# Supplementary material for: Metabolomics and biochemical analyses in functional active components of ripe mulberry fruits
Source: Research Square preprint supplement (doi:10.21203/rs.3.rs-7531724/v1), 2025-10-07
Supplement: Supplementary file 2 [file 81ba26eb5eac66b48b9b00af.xlsx]

## Sheet: AS VS DB
Map_ID	Map_Name	Test	TestAll	Ref	RefAll	Test_per	Ref_per	Over_Under	p.value	FDR	richFactor
ko00944	Flavone and flavonol biosynthesis	7	77	51	5900	9.09091	0.864407	over	3.57396e-06	0.000188537	0.137255
ko00941	Flavonoid biosynthesis	8	77	74	5900	10.3896	1.25424	over	4.38457e-06	0.000188537	0.108108
ko00940	Phenylpropanoid biosynthesis	5	77	68	5900	6.49351	1.15254	over	0.00182378	0.0522816	0.0735294
ko00943	Isoflavonoid biosynthesis	4	77	64	5900	5.1948	1.08475	over	0.00943129	0.135182	0.0625
ko00350	Tyrosine metabolism	4	77	78	5900	5.1948	1.32203	over	0.0184732	0.176521	0.0512821
ko00627	Aminobenzoate degradation	4	77	86	5900	5.1948	1.45763	over	0.0254471	0.210235	0.0465116
ko02010	ABC transporters	5	77	137	5900	6.49351	2.32203	over	0.0326932	0.210235	0.0364964
ko04152	AMPK signaling pathway	2	77	22	5900	2.5974	0.372881	over	0.0328105	0.210235	0.0909091
ko00760	Nicotinate and nicotinamide metabolism	3	77	55	5900	3.8961	0.932203	over	0.0345338	0.210235	0.0545455
ko01053	Biosynthesis of siderophore group nonribosomal peptides	2	77	24	5900	2.5974	0.40678	over	0.0385533	0.210235	0.0833333
ko00945	Stilbenoid, diarylheptanoid and gingerol biosynthesis	2	77	25	5900	2.5974	0.423729	over	0.0415581	0.210235	0.08
ko04024	cAMP signaling pathway	2	77	25	5900	2.5974	0.423729	over	0.0415581	0.210235	0.08
ko00591	Linoleic acid metabolism	2	77	28	5900	2.5974	0.474576	over	0.0510732	0.244016	0.0714286
ko00362	Benzoate degradation	3	77	72	5900	3.8961	1.22034	over	0.0672051	0.271869	0.0416667
ko01040	Biosynthesis of unsaturated fatty acids	3	77	74	5900	3.8961	1.25424	over	0.0717311	0.271869	0.0405405
ko00660	C5-Branched dibasic acid metabolism	2	77	34	5900	2.5974	0.576271	over	0.0721272	0.271869	0.0588235
ko00623	Toluene degradation	2	77	47	5900	2.5974	0.79661	over	0.124941	0.330868	0.0425532
ko00230	Purine metabolism	3	77	95	5900	3.8961	1.61017	over	0.126738	0.330868	0.0315789
ko04080	Neuroactive ligand-receptor interaction	2	77	52	5900	2.5974	0.881356	over	0.147165	0.333057	0.0384615
ko00061	Fatty acid biosynthesis	2	77	58	5900	2.5974	0.983051	over	0.174792	0.366616	0.0344828
ko04071	Sphingolipid signaling pathway	1	77	15	5900	1.2987	0.254237	over	0.179045	0.366616	0.0666667
ko00190	Oxidative phosphorylation	1	77	16	5900	1.2987	0.271186	over	0.189787	0.379573	0.0625
ko00020	Citrate cycle (TCA cycle)	1	77	20	5900	1.2987	0.338983	over	0.231383	0.432585	0.05
ko00232	Caffeine metabolism	1	77	22	5900	1.2987	0.372881	over	0.251383	0.450394	0.0454545
ko00600	Sphingolipid metabolism	1	77	25	5900	1.2987	0.423729	over	0.280424	0.472146	0.04
ko00363	Bisphenol degradation	1	77	25	5900	1.2987	0.423729	over	0.280424	0.472146	0.04
ko00998	Biosynthesis of various antibiotics	2	77	81	5900	2.5974	1.37288	over	0.285484	0.472146	0.0246914
ko00073	Cutin, suberine and wax biosynthesis	1	77	27	5900	1.2987	0.457627	over	0.299164	0.485436	0.037037
ko04216	Ferroptosis	1	77	29	5900	1.2987	0.491525	over	0.317422	0.505524	0.0344828
ko00010	Glycolysis / Gluconeogenesis	1	77	31	5900	1.2987	0.525424	over	0.335211	0.514788	0.0322581
ko00730	Thiamine metabolism	1	77	31	5900	1.2987	0.525424	over	0.335211	0.514788	0.0322581
ko00500	Starch and sucrose metabolism	1	77	37	5900	1.2987	0.627119	over	0.385876	0.582199	0.027027
ko00908	Zeatin biosynthesis	1	77	39	5900	1.2987	0.661017	over	0.401903	0.583155	0.025641
ko00062	Fatty acid elongation	1	77	40	5900	1.2987	0.677966	over	0.40976	0.583155	0.025
ko00520	Amino sugar and nucleotide sugar metabolism	2	77	108	5900	2.5974	1.83051	over	0.413633	0.583155	0.0185185
ko00650	Butanoate metabolism	1	77	42	5900	1.2987	0.711864	over	0.425171	0.589753	0.0238095
ko00052	Galactose metabolism	1	77	46	5900	1.2987	0.779661	over	0.454811	0.611152	0.0217391
ko00950	Isoquinoline alkaloid biosynthesis	2	77	122	5900	2.5974	2.0678	over	0.475781	0.619895	0.0163934
ko00053	Ascorbate and aldarate metabolism	1	77	49	5900	1.2987	0.830508	over	0.476046	0.619895	0.0204082
ko00071	Fatty acid degradation	1	77	50	5900	1.2987	0.847458	over	0.482941	0.619895	0.02
ko00983	Drug metabolism - other enzymes	1	77	52	5900	1.2987	0.881356	over	0.496464	0.627881	0.0192308
ko00051	Fructose and mannose metabolism	1	77	54	5900	1.2987	0.915254	over	0.509638	0.635201	0.0185185
ko00360	Phenylalanine metabolism	1	77	60	5900	1.2987	1.01695	over	0.547152	0.662748	0.0166667
ko00626	Naphthalene degradation	1	77	60	5900	1.2987	1.01695	over	0.547152	0.662748	0.0166667
ko00630	Glyoxylate and dicarboxylate metabolism	1	77	62	5900	1.2987	1.05085	over	0.559016	0.665419	0.016129
ko00240	Pyrimidine metabolism	1	77	65	5900	1.2987	1.1017	over	0.576239	0.667166	0.0153846
ko00942	Anthocyanin biosynthesis	1	77	66	5900	1.2987	1.11864	over	0.581831	0.667166	0.0151515
ko00590	Arachidonic acid metabolism	1	77	75	5900	1.2987	1.27119	over	0.628991	0.711753	0.0133333
ko00380	Tryptophan metabolism	1	77	83	5900	1.2987	1.40678	under	0.666479	0.744379	0.0120482
ko00130	Ubiquinone and other terpenoid-quinone biosynthesis	1	77	92	5900	1.2987	1.55932	under	0.704197	0.767947	0.0108696
ko01110	Biosynthesis of secondary metabolites	25	77	2059	5900	32.4675	34.8983	under	0.713045	0.767947	0.0121418
ko01100	Metabolic pathways	34	77	2764	5900	44.1558	46.8475	under	0.722208	0.767947	0.012301
ko00624	Polycyclic aromatic hydrocarbon degradation	1	77	107	5900	1.2987	1.81356	under	0.757923	0.794895	0.00934579
ko01212	Fatty acid metabolism	1	77	122	5900	1.2987	2.0678	under	0.801994	0.830982	0.00819672
ko01210	2-Oxocarboxylic acid metabolism	1	77	134	5900	1.2987	2.27119	under	0.831464	0.851261	0.00746269
ko01220	Degradation of aromatic compounds	2	77	263	5900	2.5974	4.45763	under	0.864598	0.87477	0.00760456
ko01120	Microbial metabolism in diverse environments	7	77	997	5900	9.09091	16.8983	under	0.983298	0.983298	0.00702106

## Sheet: MS VS DB
Map_ID	Map_Name	Test	TestAll	Ref	RefAll	Test_per	Ref_per	Over_Under	p.value	FDR	richFactor
ko00941	Flavonoid biosynthesis	7	79	74	5900	8.86076	1.25424	over	5.16369e-05	0.00314985	0.0945946
ko00940	Phenylpropanoid biosynthesis	6	79	68	5900	7.59494	1.15254	over	0.00026911	0.0109438	0.0882353
ko00944	Flavone and flavonol biosynthesis	5	79	51	5900	6.32911	0.864407	over	0.000549768	0.0122395	0.0980392
ko00970	Aminoacyl-tRNA biosynthesis	5	79	52	5900	6.32911	0.881356	over	0.000601943	0.0122395	0.0961538
ko01053	Biosynthesis of siderophore group nonribosomal peptides	3	79	24	5900	3.79747	0.40678	over	0.0038192	0.0582429	0.125
ko04080	Neuroactive ligand-receptor interaction	4	79	52	5900	5.06329	0.881356	over	0.00495343	0.0604318	0.0769231
ko02010	ABC transporters	6	79	137	5900	7.59494	2.32203	over	0.00974898	0.0782335	0.0437956
ko00660	C5-Branched dibasic acid metabolism	3	79	34	5900	3.79747	0.576271	over	0.0102601	0.0782335	0.0882353
ko00340	Histidine metabolism	3	79	47	5900	3.79747	0.79661	over	0.0245674	0.170344	0.0638298
ko00627	Aminobenzoate degradation	4	79	86	5900	5.06329	1.45763	over	0.0276454	0.170344	0.0465116
ko01230	Biosynthesis of amino acids	5	79	128	5900	6.32911	2.16949	over	0.0279253	0.170344	0.0390625
ko00760	Nicotinate and nicotinamide metabolism	3	79	55	5900	3.79747	0.932203	over	0.0368533	0.197362	0.0545455
ko00220	Arginine biosynthesis	2	79	23	5900	2.53165	0.389831	over	0.0373488	0.197362	0.0869565
ko00073	Cutin, suberine and wax biosynthesis	2	79	27	5900	2.53165	0.457627	over	0.0500749	0.231569	0.0740741
ko04150	mTOR signaling pathway	1	79	4	5900	1.26582	0.067797	over	0.0525062	0.231569	0.25
ko00943	Isoflavonoid biosynthesis	3	79	64	5900	3.79747	1.08475	over	0.0537775	0.231569	0.046875
ko04216	Ferroptosis	2	79	29	5900	2.53165	0.491525	over	0.0569431	0.231569	0.0689655
ko04068	FoxO signaling pathway	1	79	5	5900	1.26582	0.084746	over	0.0652016	0.248581	0.2
ko00362	Benzoate degradation	3	79	72	5900	3.79747	1.22034	over	0.0714309	0.264078	0.0416667
ko00330	Arginine and proline metabolism	3	79	78	5900	3.79747	1.32203	over	0.0861672	0.289238	0.0384615
ko00350	Tyrosine metabolism	3	79	78	5900	3.79747	1.32203	over	0.0861672	0.289238	0.0384615
ko00380	Tryptophan metabolism	3	79	83	5900	3.79747	1.40678	over	0.0993537	0.293336	0.0361446
ko01210	2-Oxocarboxylic acid metabolism	4	79	134	5900	5.06329	2.27119	over	0.104228	0.293336	0.0298507
ko00650	Butanoate metabolism	2	79	42	5900	2.53165	0.711864	over	0.108198	0.293336	0.047619
ko04713	Circadian entrainment	1	79	9	5900	1.26582	0.152542	over	0.114325	0.296759	0.111111
ko00331	Clavulanic acid biosynthesis	1	79	10	5900	1.26582	0.169492	over	0.126202	0.307934	0.1
ko04072	Phospholipase D signaling pathway	1	79	11	5900	1.26582	0.186441	over	0.137922	0.317481	0.0909091
ko00140	Steroid hormone biosynthesis	3	79	99	5900	3.79747	1.67797	over	0.14638	0.319954	0.030303
ko04075	Plant hormone signal transduction	1	79	12	5900	1.26582	0.20339	over	0.149487	0.319954	0.0833333
ko00997	Biosynthesis of various other secondary metabolites	2	79	52	5900	2.53165	0.881356	over	0.153297	0.322452	0.0384615
ko00624	Polycyclic aromatic hydrocarbon degradation	3	79	107	5900	3.79747	1.81356	over	0.172198	0.333462	0.0280374
ko00360	Phenylalanine metabolism	2	79	60	5900	2.53165	1.01695	over	0.191549	0.348477	0.0333333
ko00626	Naphthalene degradation	2	79	60	5900	2.53165	1.01695	over	0.191549	0.348477	0.0333333
ko00190	Oxidative phosphorylation	1	79	16	5900	1.26582	0.271186	over	0.194233	0.348477	0.0625
ko00630	Glyoxylate and dicarboxylate metabolism	2	79	62	5900	2.53165	1.05085	over	0.201312	0.355943	0.0322581
ko00910	Nitrogen metabolism	1	79	19	5900	1.26582	0.322034	over	0.22626	0.388785	0.0526316
ko00020	Citrate cycle (TCA cycle)	1	79	20	5900	1.26582	0.338983	over	0.236654	0.400997	0.05
ko00430	Taurine and hypotaurine metabolism	1	79	22	5900	1.26582	0.372881	over	0.257029	0.423751	0.0454545
ko04152	AMPK signaling pathway	1	79	22	5900	1.26582	0.372881	over	0.257029	0.423751	0.0454545
ko01040	Biosynthesis of unsaturated fatty acids	2	79	74	5900	2.53165	1.25424	over	0.260788	0.424215	0.027027
ko00791	Atrazine degradation	1	79	23	5900	1.26582	0.389831	over	0.267015	0.428629	0.0434783
ko00966	Glucosinolate biosynthesis	2	79	77	5900	2.53165	1.30509	over	0.27576	0.43305	0.025974
ko04024	cAMP signaling pathway	1	79	25	5900	1.26582	0.423729	over	0.28659	0.442582	0.04
ko00250	Alanine, aspartate and glutamate metabolism	1	79	28	5900	1.26582	0.474576	over	0.314989	0.474428	0.0357143
ko00591	Linoleic acid metabolism	1	79	28	5900	1.26582	0.474576	over	0.314989	0.474428	0.0357143
ko00770	Pantothenate and CoA biosynthesis	1	79	30	5900	1.26582	0.508475	over	0.333298	0.495883	0.0333333
ko00010	Glycolysis / Gluconeogenesis	1	79	31	5900	1.26582	0.525424	over	0.342271	0.497108	0.0322581
ko00730	Thiamine metabolism	1	79	31	5900	1.26582	0.525424	over	0.342271	0.497108	0.0322581
ko00410	beta-Alanine metabolism	1	79	32	5900	1.26582	0.542373	over	0.351124	0.498107	0.03125
ko00332	Carbapenem biosynthesis	1	79	32	5900	1.26582	0.542373	over	0.351124	0.498107	0.03125
ko00920	Sulfur metabolism	1	79	33	5900	1.26582	0.559322	over	0.35986	0.504631	0.030303
ko00400	Phenylalanine, tyrosine and tryptophan biosynthesis	1	79	34	5900	1.26582	0.576271	over	0.36848	0.510847	0.0294118
ko00500	Starch and sucrose metabolism	1	79	37	5900	1.26582	0.627119	over	0.393657	0.539619	0.027027
ko00480	Glutathione metabolism	1	79	38	5900	1.26582	0.644068	over	0.401827	0.543547	0.0263158
ko00261	Monobactam biosynthesis	1	79	39	5900	1.26582	0.661017	over	0.409888	0.543547	0.025641
ko00062	Fatty acid elongation	1	79	40	5900	1.26582	0.677966	over	0.417842	0.548137	0.025
ko01200	Carbon metabolism	2	79	114	5900	2.53165	1.9322	over	0.453834	0.579566	0.0175439
ko00460	Cyanoamino acid metabolism	1	79	45	5900	1.26582	0.762712	over	0.456052	0.579566	0.0222222
ko00623	Toluene degradation	1	79	47	5900	1.26582	0.79661	over	0.470633	0.59193	0.0212766
ko00404	Staurosporine biosynthesis	1	79	48	5900	1.26582	0.813559	over	0.477778	0.594785	0.0208333
ko00071	Fatty acid degradation	1	79	50	5900	1.26582	0.847458	over	0.491784	0.60452	0.02
ko00564	Glycerophospholipid metabolism	1	79	52	5900	1.26582	0.881356	over	0.505418	0.60452	0.0192308
ko00983	Drug metabolism - other enzymes	1	79	52	5900	1.26582	0.881356	over	0.505418	0.60452	0.0192308
ko02020	Two-component system	1	79	53	5900	1.26582	0.898305	over	0.5121	0.606564	0.0188679
ko00051	Fructose and mannose metabolism	1	79	54	5900	1.26582	0.915254	over	0.518692	0.608465	0.0185185
ko00061	Fatty acid biosynthesis	1	79	58	5900	1.26582	0.983051	over	0.544192	0.632299	0.0172414
ko00270	Cysteine and methionine metabolism	1	79	63	5900	1.26582	1.0678	over	0.574199	0.654694	0.015873
ko00621	Dioxin degradation	1	79	66	5900	1.26582	1.11864	over	0.591257	0.655758	0.0151515
ko00942	Anthocyanin biosynthesis	1	79	66	5900	1.26582	1.11864	over	0.591257	0.655758	0.0151515
ko00960	Tropane, piperidine and pyridine alkaloid biosynthesis	1	79	68	5900	1.26582	1.15254	over	0.602253	0.661936	0.0147059
ko00590	Arachidonic acid metabolism	1	79	75	5900	1.26582	1.27119	under	0.638488	0.695495	0.0133333
ko00998	Biosynthesis of various antibiotics	1	79	81	5900	1.26582	1.37288	under	0.666937	0.71374	0.0123457
ko00524	Neomycin, kanamycin and gentamicin biosynthesis	1	79	81	5900	1.26582	1.37288	under	0.666937	0.71374	0.0123457
ko00680	Methane metabolism	1	79	86	5900	1.26582	1.45763	under	0.688948	0.730884	0.0116279
ko00230	Purine metabolism	1	79	95	5900	1.26582	1.61017	under	0.725007	0.762507	0.0105263
ko00520	Amino sugar and nucleotide sugar metabolism	1	79	108	5900	1.26582	1.83051	under	0.76992	0.802822	0.00925926
ko00950	Isoquinoline alkaloid biosynthesis	1	79	122	5900	1.26582	2.0678	under	0.810205	0.823708	0.00819672
ko01212	Fatty acid metabolism	1	79	122	5900	1.26582	2.0678	under	0.810205	0.823708	0.00819672
ko00860	Porphyrin metabolism	1	79	142	5900	1.26582	2.40678	under	0.855952	0.863026	0.00704225
ko01220	Degradation of aromatic compounds	2	79	263	5900	2.53165	4.45763	under	0.874003	0.874003	0.00760456
ko01120	Microbial metabolism in diverse environments	13	79	997	5900	16.4557	16.8983	under	0.58926	0.655758	0.0130391
ko01100	Metabolic pathways	34	79	2764	5900	43.038	46.8475	under	0.786824	0.813496	0.012301
ko01110	Biosynthesis of secondary metabolites	28	79	2059	5900	35.443	34.8983	over	0.501924	0.60452	0.0135988

## Sheet: KD VS DB
Map_ID	Map_Name	Test	TestAll	Ref	RefAll	Test_per	Ref_per	Over_Under	p.value	FDR	richFactor
ko00941	Flavonoid biosynthesis	11	65	74	5900	16.9231	1.25424	over	2.9323e-10	1.84735e-08	0.148649
ko00944	Flavone and flavonol biosynthesis	7	65	51	5900	10.7692	0.864407	over	1.11956e-06	3.52661e-05	0.137255
ko00940	Phenylpropanoid biosynthesis	5	65	68	5900	7.69231	1.15254	over	0.00084805	0.0178091	0.0735294
ko01053	Biosynthesis of siderophore group nonribosomal peptides	3	65	24	5900	4.61538	0.40678	over	0.00218978	0.0306653	0.125
ko00627	Aminobenzoate degradation	5	65	86	5900	7.69231	1.45763	over	0.00243375	0.0306653	0.0581395
ko00362	Benzoate degradation	3	65	72	5900	4.61538	1.22034	over	0.0444457	0.285952	0.0416667
ko00660	C5-Branched dibasic acid metabolism	2	65	34	5900	3.07692	0.576271	over	0.0534963	0.285952	0.0588235
ko00500	Starch and sucrose metabolism	2	65	37	5900	3.07692	0.627119	over	0.0621971	0.285952	0.0540541
ko00380	Tryptophan metabolism	3	65	83	5900	4.61538	1.40678	over	0.0629417	0.285952	0.0361446
ko02010	ABC transporters	4	65	137	5900	6.15385	2.32203	over	0.063545	0.285952	0.0291971
ko00230	Purine metabolism	3	65	95	5900	4.61538	1.61017	over	0.0865421	0.296745	0.0315789
ko00052	Galactose metabolism	2	65	46	5900	3.07692	0.779661	over	0.0908199	0.296745	0.0434783
ko00623	Toluene degradation	2	65	47	5900	3.07692	0.79661	over	0.0942049	0.296745	0.0425532
ko00624	Polycyclic aromatic hydrocarbon degradation	3	65	107	5900	4.61538	1.81356	over	0.113334	0.301889	0.0280374
ko00760	Nicotinate and nicotinamide metabolism	2	65	55	5900	3.07692	0.932203	over	0.122497	0.301889	0.0363636
ko04075	Plant hormone signal transduction	1	65	12	5900	1.53846	0.20339	over	0.124589	0.301889	0.0833333
ko00360	Phenylalanine metabolism	2	65	60	5900	3.07692	1.01695	over	0.141108	0.306546	0.0333333
ko00626	Naphthalene degradation	2	65	60	5900	3.07692	1.01695	over	0.141108	0.306546	0.0333333
ko00020	Citrate cycle (TCA cycle)	1	65	20	5900	1.53846	0.338983	over	0.199022	0.413574	0.05
ko00350	Tyrosine metabolism	2	65	78	5900	3.07692	1.32203	over	0.212007	0.413574	0.025641
ko04152	AMPK signaling pathway	1	65	22	5900	1.53846	0.372881	over	0.216634	0.413574	0.0454545
ko00232	Caffeine metabolism	1	65	22	5900	1.53846	0.372881	over	0.216634	0.413574	0.0454545
ko04024	cAMP signaling pathway	1	65	25	5900	1.53846	0.423729	over	0.24234	0.424094	0.04
ko00945	Stilbenoid, diarylheptanoid and gingerol biosynthesis	1	65	25	5900	1.53846	0.423729	over	0.24234	0.424094	0.04
ko00363	Bisphenol degradation	1	65	25	5900	1.53846	0.423729	over	0.24234	0.424094	0.04
ko00770	Pantothenate and CoA biosynthesis	1	65	30	5900	1.53846	0.508475	over	0.283349	0.457718	0.0333333
ko00920	Sulfur metabolism	1	65	33	5900	1.53846	0.559322	over	0.306898	0.471865	0.030303
ko00400	Phenylalanine, tyrosine and tryptophan biosynthesis	1	65	34	5900	1.53846	0.576271	over	0.314576	0.471865	0.0294118
ko00650	Butanoate metabolism	1	65	42	5900	1.53846	0.711864	over	0.373065	0.534162	0.0238095
ko01210	2-Oxocarboxylic acid metabolism	2	65	134	5900	3.07692	2.27119	over	0.436903	0.564821	0.0149254
ko04080	Neuroactive ligand-receptor interaction	1	65	52	5900	1.53846	0.881356	over	0.439305	0.564821	0.0192308
ko00970	Aminoacyl-tRNA biosynthesis	1	65	52	5900	1.53846	0.881356	over	0.439305	0.564821	0.0192308
ko00051	Fructose and mannose metabolism	1	65	54	5900	1.53846	0.915254	over	0.451701	0.569144	0.0185185
ko00630	Glyoxylate and dicarboxylate metabolism	1	65	62	5900	1.53846	1.05085	over	0.498643	0.585683	0.016129
ko00270	Cysteine and methionine metabolism	1	65	63	5900	1.53846	1.0678	over	0.504225	0.585683	0.015873
ko00943	Isoflavonoid biosynthesis	1	65	64	5900	1.53846	1.08475	over	0.509746	0.585683	0.015625
ko00942	Anthocyanin biosynthesis	1	65	66	5900	1.53846	1.11864	over	0.520607	0.585683	0.0151515
ko00621	Dioxin degradation	1	65	66	5900	1.53846	1.11864	over	0.520607	0.585683	0.0151515
ko00966	Glucosinolate biosynthesis	1	65	77	5900	1.53846	1.30509	over	0.576239	0.635179	0.012987
ko00998	Biosynthesis of various antibiotics	1	65	81	5900	1.53846	1.37288	over	0.59485	0.635179	0.0123457
ko00520	Amino sugar and nucleotide sugar metabolism	1	65	108	5900	1.53846	1.83051	under	0.70105	0.724035	0.00925926
ko01230	Biosynthesis of amino acids	1	65	128	5900	1.53846	2.16949	under	0.761543	0.773826	0.0078125
ko01220	Degradation of aromatic compounds	2	65	263	5900	3.07692	4.45763	under	0.793524	0.793524	0.00760456
ko01110	Biosynthesis of secondary metabolites	25	65	2059	5900	38.4615	34.8983	over	0.313917	0.471865	0.0121418
ko01100	Metabolic pathways	30	65	2764	5900	46.1538	46.8475	under	0.592868	0.635179	0.0108538
ko01120	Microbial metabolism in diverse environments	10	65	997	5900	15.3846	16.8983	under	0.679184	0.713144	0.0100301

## Sheet: AS VS MS
Map_ID	Map_Name	Test	TestAll	Ref	RefAll	Test_per	Ref_per	Over_Under	p.value	FDR	richFactor
ko00941	Flavonoid biosynthesis	11	96	74	5900	11.4583	1.25424	over	2.1248e-08	1.89107e-06	0.148649
ko00944	Flavone and flavonol biosynthesis	8	96	51	5900	8.33333	0.864407	over	1.31166e-06	5.8369e-05	0.156863
ko00940	Phenylpropanoid biosynthesis	8	96	68	5900	8.33333	1.15254	over	1.2136e-05	0.000360034	0.117647
ko00627	Aminobenzoate degradation	6	96	86	5900	6.25	1.45763	over	0.00261632	0.0388087	0.0697674
ko01053	Biosynthesis of siderophore group nonribosomal peptides	3	96	24	5900	3.125	0.40678	over	0.00659512	0.0680645	0.125
ko02010	ABC transporters	7	96	137	5900	7.29167	2.32203	over	0.00667743	0.0680645	0.0510949
ko04080	Neuroactive ligand-receptor interaction	4	96	52	5900	4.16667	0.881356	over	0.00981449	0.0794081	0.0769231
ko00970	Aminoacyl-tRNA biosynthesis	4	96	52	5900	4.16667	0.881356	over	0.00981449	0.0794081	0.0769231
ko04024	cAMP signaling pathway	2	96	25	5900	2.08333	0.423729	over	0.0616951	0.353381	0.08
ko00945	Stilbenoid, diarylheptanoid and gingerol biosynthesis	2	96	25	5900	2.08333	0.423729	over	0.0616951	0.353381	0.08
ko04150	mTOR signaling pathway	1	96	4	5900	1.04167	0.067797	over	0.0635292	0.353381	0.25
ko00360	Phenylalanine metabolism	3	96	60	5900	3.125	1.01695	over	0.0735228	0.363529	0.05
ko00331	Clavulanic acid biosynthesis	1	96	10	5900	1.04167	0.169492	over	0.151408	0.497417	0.1
ko00380	Tryptophan metabolism	3	96	83	5900	3.125	1.40678	over	0.152277	0.497417	0.0361446
ko01230	Biosynthesis of amino acids	4	96	128	5900	4.16667	2.16949	over	0.154739	0.497417	0.03125
ko00340	Histidine metabolism	2	96	47	5900	2.08333	0.79661	over	0.177532	0.497417	0.0425532
ko04075	Plant hormone signal transduction	1	96	12	5900	1.04167	0.20339	over	0.178847	0.497417	0.0833333
ko00140	Steroid hormone biosynthesis	3	96	99	5900	3.125	1.67797	over	0.217706	0.525261	0.030303
ko04071	Sphingolipid signaling pathway	1	96	15	5900	1.04167	0.254237	over	0.218367	0.525261	0.0666667
ko00624	Polycyclic aromatic hydrocarbon degradation	3	96	107	5900	3.125	1.81356	over	0.252383	0.547855	0.0280374
ko00943	Isoflavonoid biosynthesis	2	96	64	5900	2.08333	1.08475	over	0.279616	0.592519	0.03125
ko04152	AMPK signaling pathway	1	96	22	5900	1.04167	0.372881	over	0.303411	0.609046	0.0454545
ko00220	Arginine biosynthesis	1	96	23	5900	1.04167	0.389831	over	0.314788	0.609046	0.0434783
ko00791	Atrazine degradation	1	96	23	5900	1.04167	0.389831	over	0.314788	0.609046	0.0434783
ko00362	Benzoate degradation	2	96	72	5900	2.08333	1.22034	over	0.32791	0.617319	0.0277778
ko00600	Sphingolipid metabolism	1	96	25	5900	1.04167	0.423729	over	0.336992	0.617319	0.04
ko01040	Biosynthesis of unsaturated fatty acids	2	96	74	5900	2.08333	1.25424	over	0.339872	0.617319	0.027027
ko00966	Glucosinolate biosynthesis	2	96	77	5900	2.08333	1.30509	over	0.357694	0.619593	0.025974
ko00073	Cutin, suberine and wax biosynthesis	1	96	27	5900	1.04167	0.457627	over	0.358485	0.619593	0.037037
ko00350	Tyrosine metabolism	2	96	78	5900	2.08333	1.32203	over	0.363598	0.619593	0.025641
ko00591	Linoleic acid metabolism	1	96	28	5900	1.04167	0.474576	over	0.368971	0.619593	0.0357143
ko00998	Biosynthesis of various antibiotics	2	96	81	5900	2.08333	1.37288	over	0.381187	0.628252	0.0246914
ko00010	Glycolysis / Gluconeogenesis	1	96	31	5900	1.04167	0.525424	over	0.399423	0.646338	0.0322581
ko00410	beta-Alanine metabolism	1	96	32	5900	1.04167	0.542373	over	0.409246	0.650409	0.03125
ko00400	Phenylalanine, tyrosine and tryptophan biosynthesis	1	96	34	5900	1.04167	0.576271	over	0.428419	0.668935	0.0294118
ko00500	Starch and sucrose metabolism	1	96	37	5900	1.04167	0.627119	over	0.45603	0.679987	0.027027
ko00230	Purine metabolism	2	96	95	5900	2.08333	1.61017	over	0.460276	0.679987	0.0210526
ko00261	Monobactam biosynthesis	1	96	39	5900	1.04167	0.661017	over	0.473699	0.679987	0.025641
ko00908	Zeatin biosynthesis	1	96	39	5900	1.04167	0.661017	over	0.473699	0.679987	0.025641
ko00460	Cyanoamino acid metabolism	1	96	45	5900	1.04167	0.762712	over	0.52337	0.724927	0.0222222
ko00052	Galactose metabolism	1	96	46	5900	1.04167	0.779661	over	0.531185	0.724927	0.0217391
ko00623	Toluene degradation	1	96	47	5900	1.04167	0.79661	over	0.538873	0.724927	0.0212766
ko00404	Staurosporine biosynthesis	1	96	48	5900	1.04167	0.813559	over	0.546437	0.724927	0.0208333
ko00053	Ascorbate and aldarate metabolism	1	96	49	5900	1.04167	0.830508	over	0.553877	0.724927	0.0204082
ko00564	Glycerophospholipid metabolism	1	96	52	5900	1.04167	0.881356	over	0.575482	0.731684	0.0192308
ko00997	Biosynthesis of various other secondary metabolites	1	96	52	5900	1.04167	0.881356	over	0.575482	0.731684	0.0192308
ko00760	Nicotinate and nicotinamide metabolism	1	96	55	5900	1.04167	0.932203	over	0.59605	0.747162	0.0181818
ko00061	Fatty acid biosynthesis	1	96	58	5900	1.04167	0.983051	over	0.615632	0.76099	0.0172414
ko00626	Naphthalene degradation	1	96	60	5900	1.04167	1.01695	over	0.628162	0.765841	0.0166667
ko00270	Cysteine and methionine metabolism	1	96	63	5900	1.04167	1.0678	under	0.646202	0.76676	0.015873
ko01210	2-Oxocarboxylic acid metabolism	2	96	134	5900	2.08333	2.27119	under	0.646314	0.76676	0.0149254
ko00942	Anthocyanin biosynthesis	1	96	66	5900	1.04167	1.11864	under	0.663376	0.76676	0.0151515
ko00621	Dioxin degradation	1	96	66	5900	1.04167	1.11864	under	0.663376	0.76676	0.0151515
ko00960	Tropane, piperidine and pyridine alkaloid biosynthesis	1	96	68	5900	1.04167	1.15254	under	0.674365	0.769467	0.0147059
ko00330	Arginine and proline metabolism	1	96	78	5900	1.04167	1.32203	under	0.724202	0.815873	0.0128205
ko00680	Methane metabolism	1	96	86	5900	1.04167	1.45763	under	0.758571	0.837872	0.0116279
ko00982	Drug metabolism - cytochrome P450	1	96	87	5900	1.04167	1.47458	under	0.762557	0.837872	0.0114943
ko00130	Ubiquinone and other terpenoid-quinone biosynthesis	1	96	92	5900	1.04167	1.55932	under	0.781533	0.848249	0.0108696
ko01220	Degradation of aromatic compounds	2	96	263	5900	2.08333	4.45763	under	0.932745	0.943344	0.00760456
ko01200	Carbon metabolism	1	96	114	5900	1.04167	1.9322	under	0.848696	0.891263	0.00877193
ko00906	Carotenoid biosynthesis	1	96	115	5900	1.04167	1.94915	under	0.851207	0.891263	0.00869565
ko00950	Isoquinoline alkaloid biosynthesis	1	96	122	5900	1.04167	2.0678	under	0.867662	0.897929	0.00819672
ko01120	Microbial metabolism in diverse environments	11	96	997	5900	11.4583	16.8983	under	0.94797	0.94797	0.0110331
ko01110	Biosynthesis of secondary metabolites	30	96	2059	5900	31.25	34.8983	under	0.805447	0.863672	0.0145702
ko01100	Metabolic pathways	39	96	2764	5900	40.625	46.8475	under	0.909469	0.930376	0.01411

## Sheet: AS VS KD
Map_ID	Map_Name	Test	TestAll	Ref	RefAll	Test_per	Ref_per	Over_Under	p.value	FDR	richFactor
ko00941	Flavonoid biosynthesis	8	64	74	5900	12.5	1.25424	over	1.05058e-06	7.77428e-05	0.108108
ko00940	Phenylpropanoid biosynthesis	6	64	68	5900	9.375	1.15254	over	8.31083e-05	0.00307501	0.0882353
ko02010	ABC transporters	6	64	137	5900	9.375	2.32203	over	0.00348802	0.0860379	0.0437956
ko00943	Isoflavonoid biosynthesis	4	64	64	5900	6.25	1.08475	over	0.00491664	0.0909579	0.0625
ko00944	Flavone and flavonol biosynthesis	3	64	51	5900	4.6875	0.864407	over	0.0175127	0.236867	0.0588235
ko00230	Purine metabolism	4	64	95	5900	6.25	1.61017	over	0.0192054	0.236867	0.0421053
ko04024	cAMP signaling pathway	2	64	25	5900	3.125	0.423729	over	0.0296046	0.312962	0.08
ko04150	mTOR signaling pathway	1	64	4	5900	1.5625	0.067797	over	0.0426996	0.368729	0.25
ko00400	Phenylalanine, tyrosine and tryptophan biosynthesis	2	64	34	5900	3.125	0.576271	over	0.0520345	0.368729	0.0588235
ko00627	Aminobenzoate degradation	3	64	86	5900	4.6875	1.45763	over	0.0660273	0.37807	0.0348837
ko00331	Clavulanic acid biosynthesis	1	64	10	5900	1.5625	0.169492	over	0.103405	0.380586	0.1
ko04080	Neuroactive ligand-receptor interaction	2	64	52	5900	3.125	0.881356	over	0.108808	0.380586	0.0384615
ko00970	Aminoacyl-tRNA biosynthesis	2	64	52	5900	3.125	0.881356	over	0.108808	0.380586	0.0384615
ko00061	Fatty acid biosynthesis	2	64	58	5900	3.125	0.983051	over	0.130267	0.385591	0.0344828
ko00360	Phenylalanine metabolism	2	64	60	5900	3.125	1.01695	over	0.137627	0.388509	0.0333333
ko04071	Sphingolipid signaling pathway	1	64	15	5900	1.5625	0.254237	over	0.151085	0.397754	0.0666667
ko01230	Biosynthesis of amino acids	3	64	128	5900	4.6875	2.16949	over	0.161252	0.397754	0.0234375
ko00232	Caffeine metabolism	1	64	22	5900	1.5625	0.372881	over	0.21367	0.461402	0.0454545
ko00220	Arginine biosynthesis	1	64	23	5900	1.5625	0.389831	over	0.222231	0.461402	0.0434783
ko00380	Tryptophan metabolism	2	64	83	5900	3.125	1.40678	over	0.227143	0.461402	0.0240964
ko00643	Styrene degradation	1	64	24	5900	1.5625	0.40678	over	0.230701	0.461402	0.0416667
ko01053	Biosynthesis of siderophore group nonribosomal peptides	1	64	24	5900	1.5625	0.40678	over	0.230701	0.461402	0.0416667
ko00945	Stilbenoid, diarylheptanoid and gingerol biosynthesis	1	64	25	5900	1.5625	0.423729	over	0.23908	0.465577	0.04
ko00073	Cutin, suberine and wax biosynthesis	1	64	27	5900	1.5625	0.457627	over	0.25557	0.483523	0.037037
ko00591	Linoleic acid metabolism	1	64	28	5900	1.5625	0.474576	over	0.263682	0.483523	0.0357143
ko00770	Pantothenate and CoA biosynthesis	1	64	30	5900	1.5625	0.508475	over	0.279646	0.483523	0.0333333
ko00010	Glycolysis / Gluconeogenesis	1	64	31	5900	1.5625	0.525424	over	0.2875	0.483523	0.0322581
ko00410	beta-Alanine metabolism	1	64	32	5900	1.5625	0.542373	over	0.29527	0.485555	0.03125
ko00660	C5-Branched dibasic acid metabolism	1	64	34	5900	1.5625	0.576271	over	0.31056	0.499596	0.0294118
ko00624	Polycyclic aromatic hydrocarbon degradation	2	64	107	5900	3.125	1.81356	over	0.323928	0.510014	0.0186916
ko00500	Starch and sucrose metabolism	1	64	37	5900	1.5625	0.627119	over	0.332884	0.513197	0.027027
ko00261	Monobactam biosynthesis	1	64	39	5900	1.5625	0.661017	over	0.34737	0.514108	0.025641
ko00908	Zeatin biosynthesis	1	64	39	5900	1.5625	0.661017	over	0.34737	0.514108	0.025641
ko00062	Fatty acid elongation	1	64	40	5900	1.5625	0.677966	over	0.354497	0.514368	0.025
ko00052	Galactose metabolism	1	64	46	5900	1.5625	0.779661	over	0.395675	0.535593	0.0217391
ko00623	Toluene degradation	1	64	47	5900	1.5625	0.79661	over	0.402282	0.535593	0.0212766
ko00053	Ascorbate and aldarate metabolism	1	64	49	5900	1.5625	0.830508	over	0.415283	0.535593	0.0204082
ko00071	Fatty acid degradation	1	64	50	5900	1.5625	0.847458	over	0.421679	0.535593	0.02
ko01210	2-Oxocarboxylic acid metabolism	2	64	134	5900	3.125	2.27119	over	0.429089	0.535593	0.0149254
ko00564	Glycerophospholipid metabolism	1	64	52	5900	1.5625	0.881356	over	0.434265	0.535593	0.0192308
ko00997	Biosynthesis of various other secondary metabolites	1	64	52	5900	1.5625	0.881356	over	0.434265	0.535593	0.0192308
ko00760	Nicotinate and nicotinamide metabolism	1	64	55	5900	1.5625	0.932203	over	0.452639	0.549103	0.0181818
ko00270	Cysteine and methionine metabolism	1	64	63	5900	1.5625	1.0678	over	0.498815	0.59536	0.015873
ko00240	Pyrimidine metabolism	1	64	65	5900	1.5625	1.1017	over	0.509746	0.598749	0.0153846
ko00960	Tropane, piperidine and pyridine alkaloid biosynthesis	1	64	68	5900	1.5625	1.15254	over	0.525704	0.607845	0.0147059
ko00362	Benzoate degradation	1	64	72	5900	1.5625	1.22034	over	0.546189	0.621815	0.0138889
ko01040	Biosynthesis of unsaturated fatty acids	1	64	74	5900	1.5625	1.25424	over	0.556102	0.623508	0.0135135
ko00966	Glucosinolate biosynthesis	1	64	77	5900	1.5625	1.30509	over	0.570573	0.626054	0.012987
ko00330	Arginine and proline metabolism	1	64	78	5900	1.5625	1.32203	over	0.575293	0.626054	0.0128205
ko00130	Ubiquinone and other terpenoid-quinone biosynthesis	1	64	92	5900	1.5625	1.55932	over	0.636247	0.681399	0.0108696
ko00906	Carotenoid biosynthesis	1	64	115	5900	1.5625	1.94915	under	0.718217	0.748564	0.00869565
ko01212	Fatty acid metabolism	1	64	122	5900	1.5625	2.0678	under	0.739338	0.759875	0.00819672
ko01220	Degradation of aromatic compounds	1	64	263	5900	1.5625	4.45763	under	0.946842	0.959812	0.00380228
ko01120	Microbial metabolism in diverse environments	5	64	997	5900	7.8125	16.8983	under	0.989328	0.989328	0.00501505
ko01110	Biosynthesis of secondary metabolites	24	64	2059	5900	37.5	34.8983	over	0.374989	0.523569	0.0116561
ko01100	Metabolic pathways	29	64	2764	5900	45.3125	46.8475	under	0.644567	0.681399	0.010492

## Sheet: KD VS MS
Map_ID	Map_Name	Test	TestAll	Ref	RefAll	Test_per	Ref_per	Over_Under	p.value	FDR	richFactor
ko00941	Flavonoid biosynthesis	11	88	74	5900	12.5	1.25424	over	8.34845e-09	8.93284e-07	0.148649
ko00944	Flavone and flavonol biosynthesis	6	88	51	5900	6.81818	0.864407	over	9.74782e-05	0.00347672	0.117647
ko00360	Phenylalanine metabolism	6	88	60	5900	6.81818	1.01695	over	0.0002434	0.00651095	0.1
ko02010	ABC transporters	8	88	137	5900	9.09091	2.32203	over	0.000927145	0.0175779	0.0583942
ko00970	Aminoacyl-tRNA biosynthesis	5	88	52	5900	5.68182	0.881356	over	0.000985675	0.0175779	0.0961538
ko00400	Phenylalanine, tyrosine and tryptophan biosynthesis	4	88	34	5900	4.54545	0.576271	over	0.00152288	0.0203686	0.117647
ko00943	Isoflavonoid biosynthesis	5	88	64	5900	5.68182	1.08475	over	0.00251396	0.0298881	0.078125
ko01053	Biosynthesis of siderophore group nonribosomal peptides	3	88	24	5900	3.40909	0.40678	over	0.00517428	0.0553648	0.125
ko04080	Neuroactive ligand-receptor interaction	4	88	52	5900	4.54545	0.881356	over	0.0072539	0.0646806	0.0769231
ko01230	Biosynthesis of amino acids	6	88	128	5900	6.81818	2.16949	over	0.0117797	0.0969561	0.046875
ko00460	Cyanoamino acid metabolism	3	88	45	5900	3.40909	0.762712	over	0.0290022	0.193953	0.0666667
ko00627	Aminobenzoate degradation	4	88	86	5900	4.54545	1.45763	over	0.038916	0.244942	0.0465116
ko00564	Glycerophospholipid metabolism	3	88	52	5900	3.40909	0.881356	over	0.0419526	0.249385	0.0576923
ko00230	Purine metabolism	4	88	95	5900	4.54545	1.61017	over	0.0528137	0.282802	0.0421053
ko04024	cAMP signaling pathway	2	88	25	5900	2.27273	0.423729	over	0.0528602	0.282802	0.08
ko04150	mTOR signaling pathway	1	88	4	5900	1.13636	0.067797	over	0.058354	0.295133	0.25
ko00073	Cutin, suberine and wax biosynthesis	2	88	27	5900	2.27273	0.457627	over	0.0606816	0.295133	0.0740741
ko00940	Phenylpropanoid biosynthesis	3	88	68	5900	3.40909	1.15254	over	0.0804692	0.344408	0.0441176
ko00960	Tropane, piperidine and pyridine alkaloid biosynthesis	3	88	68	5900	3.40909	1.15254	over	0.0804692	0.344408	0.0441176
ko00966	Glucosinolate biosynthesis	3	88	77	5900	3.40909	1.30509	over	0.106994	0.384149	0.038961
ko00261	Monobactam biosynthesis	2	88	39	5900	2.27273	0.661017	over	0.114406	0.384149	0.0512821
ko00998	Biosynthesis of various antibiotics	3	88	81	5900	3.40909	1.37288	over	0.119752	0.384149	0.037037
ko00380	Tryptophan metabolism	3	88	83	5900	3.40909	1.40678	over	0.126335	0.384149	0.0361446
ko01210	2-Oxocarboxylic acid metabolism	4	88	134	5900	4.54545	2.27119	over	0.139143	0.384149	0.0298507
ko00331	Clavulanic acid biosynthesis	1	88	10	5900	1.13636	0.169492	over	0.139629	0.384149	0.1
ko00623	Toluene degradation	2	88	47	5900	2.27273	0.79661	over	0.154924	0.384149	0.0425532
ko00340	Histidine metabolism	2	88	47	5900	2.27273	0.79661	over	0.154924	0.384149	0.0425532
ko04075	Plant hormone signal transduction	1	88	12	5900	1.13636	0.20339	over	0.165148	0.384149	0.0833333
ko00140	Steroid hormone biosynthesis	3	88	99	5900	3.40909	1.67797	over	0.183166	0.41472	0.030303
ko04071	Sphingolipid signaling pathway	1	88	15	5900	1.13636	0.254237	over	0.20203	0.432272	0.0666667
ko00061	Fatty acid biosynthesis	2	88	58	5900	2.27273	0.983051	over	0.214116	0.432272	0.0344828
ko01055	Biosynthesis of vancomycin group antibiotics	1	88	19	5900	1.13636	0.322034	over	0.248711	0.475215	0.0526316
ko00020	Citrate cycle (TCA cycle)	1	88	20	5900	1.13636	0.338983	over	0.259952	0.487981	0.05
ko04152	AMPK signaling pathway	1	88	22	5900	1.13636	0.372881	over	0.28194	0.489341	0.0454545
ko00232	Caffeine metabolism	1	88	22	5900	1.13636	0.372881	over	0.28194	0.489341	0.0454545
ko00362	Benzoate degradation	2	88	72	5900	2.27273	1.22034	over	0.291731	0.489341	0.0277778
ko00791	Atrazine degradation	1	88	23	5900	1.13636	0.389831	over	0.29269	0.489341	0.0434783
ko00220	Arginine biosynthesis	1	88	23	5900	1.13636	0.389831	over	0.29269	0.489341	0.0434783
ko00710	Carbon fixation in photosynthetic organisms	1	88	23	5900	1.13636	0.389831	over	0.29269	0.489341	0.0434783
ko00290	Valine, leucine and isoleucine biosynthesis	1	88	23	5900	1.13636	0.389831	over	0.29269	0.489341	0.0434783
ko00643	Styrene degradation	1	88	24	5900	1.13636	0.40678	over	0.303281	0.489642	0.0416667
ko00965	Betalain biosynthesis	1	88	24	5900	1.13636	0.40678	over	0.303281	0.489642	0.0416667
ko00945	Stilbenoid, diarylheptanoid and gingerol biosynthesis	1	88	25	5900	1.13636	0.423729	over	0.313715	0.489642	0.04
ko00363	Bisphenol degradation	1	88	25	5900	1.13636	0.423729	over	0.313715	0.489642	0.04
ko00330	Arginine and proline metabolism	2	88	78	5900	2.27273	1.32203	over	0.324903	0.489642	0.025641
ko00350	Tyrosine metabolism	2	88	78	5900	2.27273	1.32203	over	0.324903	0.489642	0.025641
ko00680	Methane metabolism	2	88	86	5900	2.27273	1.45763	over	0.368495	0.524783	0.0232558
ko00010	Glycolysis / Gluconeogenesis	1	88	31	5900	1.13636	0.525424	over	0.373153	0.524783	0.0322581
ko00620	Pyruvate metabolism	1	88	31	5900	1.13636	0.525424	over	0.373153	0.524783	0.0322581
ko00730	Thiamine metabolism	1	88	31	5900	1.13636	0.525424	over	0.373153	0.524783	0.0322581
ko00410	beta-Alanine metabolism	1	88	32	5900	1.13636	0.542373	over	0.382552	0.524783	0.03125
ko00401	Novobiocin biosynthesis	1	88	32	5900	1.13636	0.542373	over	0.382552	0.524783	0.03125
ko00660	C5-Branched dibasic acid metabolism	1	88	34	5900	1.13636	0.576271	over	0.400934	0.543037	0.0294118
ko00500	Starch and sucrose metabolism	1	88	37	5900	1.13636	0.627119	over	0.427497	0.571778	0.027027
ko00908	Zeatin biosynthesis	1	88	39	5900	1.13636	0.661017	over	0.444556	0.587252	0.025641
ko00062	Fatty acid elongation	1	88	40	5900	1.13636	0.677966	over	0.452895	0.590973	0.025
ko00280	Valine, leucine and isoleucine degradation	1	88	42	5900	1.13636	0.711864	over	0.469205	0.597678	0.0238095
ko00624	Polycyclic aromatic hydrocarbon degradation	2	88	107	5900	2.27273	1.81356	over	0.476937	0.60038	0.0186916
ko00052	Galactose metabolism	1	88	46	5900	1.13636	0.779661	over	0.500396	0.61543	0.0217391
ko01110	Biosynthesis of secondary metabolites	31	88	2059	5900	35.2273	34.8983	over	0.514495	0.619524	0.0150559
ko00404	Staurosporine biosynthesis	1	88	48	5900	1.13636	0.813559	over	0.515305	0.619524	0.0208333
ko00053	Ascorbate and aldarate metabolism	1	88	49	5900	1.13636	0.830508	over	0.522594	0.621306	0.0204082
ko00071	Fatty acid degradation	1	88	50	5900	1.13636	0.847458	over	0.529774	0.622921	0.02
ko00997	Biosynthesis of various other secondary metabolites	1	88	52	5900	1.13636	0.881356	over	0.543816	0.626838	0.0192308
ko00950	Isoquinoline alkaloid biosynthesis	2	88	122	5900	2.27273	2.0678	over	0.547304	0.626838	0.0163934
ko02020	Two-component system	1	88	53	5900	1.13636	0.898305	over	0.55068	0.626838	0.0188679
ko00626	Naphthalene degradation	1	88	60	5900	1.13636	1.01695	over	0.595955	0.671234	0.0166667
ko00630	Glyoxylate and dicarboxylate metabolism	1	88	62	5900	1.13636	1.05085	over	0.608041	0.677243	0.016129
ko00621	Dioxin degradation	1	88	66	5900	1.13636	1.11864	over	0.631151	0.682153	0.0151515
ko00942	Anthocyanin biosynthesis	1	88	66	5900	1.13636	1.11864	over	0.631151	0.682153	0.0151515
ko01040	Biosynthesis of unsaturated fatty acids	1	88	74	5900	1.13636	1.25424	under	0.673405	0.720543	0.0135135
ko00982	Drug metabolism - cytochrome P450	1	88	87	5900	1.13636	1.47458	under	0.732088	0.775579	0.0114943
ko00130	Ubiquinone and other terpenoid-quinone biosynthesis	1	88	92	5900	1.13636	1.55932	under	0.751769	0.78862	0.0108696
ko01100	Metabolic pathways	38	88	2764	5900	43.1818	46.8475	under	0.788392	0.819009	0.0137482
ko01200	Carbon metabolism	1	88	114	5900	1.13636	1.9322	under	0.822697	0.846428	0.00877193
ko01212	Fatty acid metabolism	1	88	122	5900	1.13636	2.0678	under	0.843167	0.859228	0.00819672
ko01220	Degradation of aromatic compounds	2	88	263	5900	2.27273	4.45763	under	0.909329	0.917908	0.00760456
ko01120	Microbial metabolism in diverse environments	9	88	997	5900	10.2273	16.8983	under	0.972533	0.972533	0.00902708
