# Supplementary material for: Metabolomics and biochemical analyses in functional active components of ripe mulberry fruits
Source: Research Square preprint supplement (doi:10.21203/rs.3.rs-7531724/v1), 2025-10-07
Supplement: Supplementary file 3 [file 863ba8ac3eafe73ad0624a77.xlsx]

## Sheet: Hub metabolites
Table S4 Hub metabolites related to antioxidant capacity.
ID	Module	Name	Category		KEGG	MetaboliteContents				Fold change (FC)			Connectivity
			Superclass	Class		AS	DB	KD	MS	AS/DB	KD/DB	MS/DB	kTotal	kWithin	kOut	kDiff
NEG_621	blue	3,4-Dihydroxybenzoic acid	Benzenoids	Benzene and substituted derivatives	C00230	279356	3021.68	50153.9	10805.7	92.4504	16.598	3.57605	71.8487	59.963	11.8856	48.0774
NEG_7061	blue	Kaempferol 7-O-glucoside(山萘酚-7-O-葡萄糖苷)	Phenylpropanoids and polyketides	Flavonoids	0	404745	16711.4	60207.8	9732.55	24.2197	3.6028	0.58239	69.9621	59.7962	10.1659	49.6304
NEG_8969	blue	Isochlorogenic acid B	0	0	0	429397	55043.1	102709	33639.8	7.80111	1.86598	0.611154	70.9167	59.5768	11.3399	48.2369
NEG_9816	blue	Flavonol base + 4O, O-MalonylHex	Phenylpropanoids and polyketides	Flavonoids	C12638	2.76365e+06	236013	854733	274735	11.7097	3.62155	1.16407	76.0894	59.5432	16.5461	42.9971
NEG_8701	blue	Quercetin-3-O-glucosyl-6''-acetate	Phenylpropanoids and polyketides	Flavonoids	0	1.7183e+07	1.49379e+06	5.55314e+06	1.8807e+06	11.503	3.71749	1.25901	76.1078	59.0712	17.0366	42.0345
NEG_13716	blue	3-[6-[[(2R,3R,4R,5S,6S)-3,5-Dihydroxy-6-methyl-4-[(2S,3R,4R,5R,6S)-3,4,5-trihydroxy-6-methyloxan-2-yl]oxyoxan-2-yl]oxymethyl]-3,4,5-trihydroxyoxan-2-yl]oxy-2-(3,4-dihydroxyphenyl)-5,7-dihydroxychromen-4-one	Phenylpropanoids and polyketides	Flavonoids	0	188124	15836.8	61593.4	17421.2	11.8789	3.88925	1.10004	76.6421	58.9635	17.6786	41.2849
NEG_3461	blue	Hydroxygenkwanin	0	0	0	78254	15726.9	31530.8	18150.4	4.97581	2.0049	1.1541	75.2146	58.7873	16.4273	42.36
POS_10854	blue	9-Methoxy-7-[4-[3,4,5-trihydroxy-6-[[3,4,5-trihydroxy-6-(hydroxymethyl)oxan-2-yl]oxymethyl]oxan-2-yl]oxyphenyl]-[1,3]dioxolo[4,5-g]chromen-8-one	Phenylpropanoids and polyketides	Isoflavonoids	0	13040.3	1738.39	2691.17	374.091	7.50135	1.54808	0.215194	68.7538	58.7838	9.96993	48.8139
NEG_11397	blue	Isorhamnetin-3-O-galactoside-6''-rhamnoside	0	0	0	70502	1902.39	20768.6	4631.52	37.0598	10.9172	2.43458	75.5546	58.2668	17.2879	40.9789
NEG_15587	blue	3-[(2S,3R,4S,5S,6R)-4,5-Dihydroxy-3-[(2S,3R,4R,5R,6S)-3,4,5-trihydroxy-6-methyloxan-2-yl]oxy-6-[[(2S,3R,4R,5R,6S)-3,4,5-trihydroxy-6-methyloxan-2-yl]oxymethyl]oxan-2-yl]oxy-5-hydroxy-2-(4-hydroxyphenyl)-6-methoxy-7-[(2S,3R,4R,5R,6S)-3,4,5-trihydroxy-6-methyloxan-2-yl]oxychromen-4-one	Phenylpropanoids and polyketides	Flavonoids	0	34165.6	6461.62	7876.8	3971.83	5.28747	1.21901	0.614679	66.9752	58.1642	8.81102	49.3532
POS_3227	yellow	Quercetin（槲皮素）	Phenylpropanoids and polyketides	Flavonoids	C00389	814833	97850	713800	105517	8.32737	7.29484	1.07835	69.7127	47.9148	21.7979	26.1169
NEG_1060	yellow	4-Methoxycinnamic acid	Phenylpropanoids and polyketides	Cinnamic acids and derivatives		11666.7	3051.67	10578	3035	3.82305	3.4663	0.994539	68.1075	46.7561	21.3514	25.4047
NEG_7124	yellow	Eriodictyol-7-O-glucoside(圣草酚-7-O-葡萄糖苷)	Phenylpropanoids and polyketides	Flavonoids		55650	4808.33	58620	9433.33	11.5737	12.1913	1.96187	61.4232	46.6407	14.7826	31.8581
NEG_270	yellow	Pyrrolidine-2-carboxamide	Organic acids and derivatives	Carboxylic acids and derivatives		87816.7	11385	82400	6618.33	7.71337	7.23759	0.58132	64.3615	46.1741	18.1874	27.9867
NEG_7611	yellow	Taxifolin-3-glucoside（花旗松素-3-葡萄糖苷）	Phenylpropanoids and polyketides	Flavonoids		1.70167e+06	262333	1660000	117950	6.48666	6.32783	0.449619	63.0062	45.4838	17.5224	27.9614
NEG_7537	yellow	Spiraeoside	Phenylpropanoids and polyketides	Flavonoids		40500	12016.7	34100	9405	3.37032	2.83773	0.782663	66.9184	42.7977	24.1207	18.6771
NEG_7127	yellow	Flavanomarein	Phenylpropanoids and polyketides	Flavonoids		285500	23933.3	201800	23800	11.929	8.43175	0.994429	74.9818	42.7301	32.2517	10.4784
NEG_10900	yellow	3'-Galloylquercitrin（3″-O-没食子酰基槲皮苷）	Phenylpropanoids and polyketides	Flavonoids		106700	1476.33	95320	20750	72.2737	64.5654	14.0551	59.2694	42.0687	17.2006	24.8681
NEG_2636	yellow	Nordazepam	Organoheterocyclic compounds	Benzodiazepines	C07486	8311.67	141.35	8978	464	58.802	63.5161	3.28263	56.2174	41.9839	14.2335	27.7504
NEG_6754	yellow	Coatlin A	Phenylpropanoids and polyketides	Linear 1,3-diarylpropanoids		1.40333e+06	39916.7	969600	107400	35.1566	24.2906	2.69061	74.5848	41.8969	32.6879	9.20895
