# Supplementary material for: Metabolomics and biochemical analyses in functional active components of ripe mulberry fruits
Source: Research Square preprint supplement (doi:10.21203/rs.3.rs-7531724/v1), 2025-10-07
Supplement: Supplementary file 4 [file 9a8286fe2ba4b6202ce70d2c.xlsx]

## Sheet: AS VS DB
ID	Name	Class	Subclass	AS-1	AS-2	AS-3	AS-4	AS-5	AS-6	DB-1	DB-2	DB-3	DB-4	DB-5	DB-6	VIP	P_value	FDR	Fold Change	log2(FC)	Type	KEGG
POS_6508	Luteolin 7-galactoside	Flavonoids	Flavonoid glycosides	2.39483e+07	2.95249e+07	2.21761e+07	2.64781e+07	4.35565e+07	2.32125e+07	10914.6	12481.2	7462.87	5408.09	6557.14	2003.49	1.24582	6.0896e-06	1.9717e-05	3767.7	11.879	up	0
POS_6506	Plantaginin	Flavonoids	Flavonoid glycosides	2.76075e+07	2.49232e+07	1.66391e+07	1.58239e+07	1.89031e+07	2.90535e+07	8947.2	7022.84	5788.44	5669.63	4908.51	7915.63	1.26259	2.7537e-06	9.955e-06	3302.9	11.69	up	0
NEG_620	2,3-Dihydroxybenzoic acid	Benzenoids	Benzoic acids and derivatives	360607	283499	385875	355706	280674	321213	4077	5792.18	4432.68	3968.55	5148.58	5747.42	1.30875	4.7069e-09	4.6128e-08	68.146	6.0906	up	C00196
NEG_908	4-Methoxysalicylic acid	Benzenoids	Benzoic acids and derivatives	1.54531e+06	1.43372e+06	1.3934e+06	1.53797e+06	1.52372e+06	1.58891e+06	5086.62	28618.9	29385.3	33092	29799.5	26755.6	1.32627	3.5198e-13	4.8171e-11	59.075	5.8845	up	0
NEG_6754	Coatlin A	Linear 1,3-diarylpropanoids	Chalcones and dihydrochalcones	1.43977e+06	1.26476e+06	1.52378e+06	1.43305e+06	1.39852e+06	1.36856e+06	44360.3	36575.8	39855	43345	38159.6	37093.4	1.32325	3.1184e-12	2.7159e-10	35.208	5.1378	up	0
NEG_7051	Cyanidin 3-O-galactoside	Flavonoids	Flavonoid glycosides	7.18519e+06	5.74591e+06	7.31895e+06	6.10523e+06	4.47625e+06	2.14875e+06	3397.98	3944.96	2200.13	2749.2	8882.56	7886.18	1.2055	4.0563e-05	0.00011264	1134.9	10.148	up	C08647
NEG_7541	Isoquercitrin	Flavonoids	Flavonoid glycosides	6.46145e+06	6.14592e+06	6.01108e+06	7.05229e+06	6.68024e+06	6.73993e+06	2.4843e+06	2.29653e+06	2.45056e+06	2.46553e+06	2.24628e+06	2.22637e+06	1.3183	2.4152e-10	4.4495e-09	2.7588	1.464	up	C05623
NEG_4515	Lactulose	Organooxygen compounds	Carbohydrates and carbohydrate conjugates	4572.22	1933.47	3853.32	5422.01	5998.65	7832.77	199037	229988	232915	179725	201434	223833	1.31602	3.7762e-10	6.5774e-09	0.023373	-5.419	down	C07064
NEG_7611	Taxifolin-3-glucoside	Flavonoids	Flavonoid glycosides	2.02542e+06	1.61363e+06	1.77789e+06	1.69057e+06	1.43607e+06	1.65612e+06	298564	233387	252653	276177	248185	264876	1.30826	6.3659e-09	5.9789e-08	6.4808	2.6962	up	0
POS_3124	Hydrocinchonine	Alkaloids and derivatives	0	2.96733e+06	2.4879e+06	3.19853e+06	2.799e+06	2.55097e+06	2.6581e+06	599313	507555	549738	532229	537940	537480	1.31101	1.9799e-09	2.5562e-08	5.1043	2.3517	up	0
NEG_14002	Quercetin 3-rutinoside 7-galactoside	Flavonoids	Flavonoid glycosides	78290.8	72268.1	82546.6	81982.1	76968.8	76218.5	15518.7	14593	15813.4	15851.5	14973.3	15220.3	1.32342	2.4653e-12	2.3618e-10	5.0916	2.3481	up	0
NEG_4756	6:3+6O Fatty acyl hexoside	Fatty Acyls	Fatty acyl glycosides	101481	94576.3	126176	143127	106092	116370	8615.83	12760.6	5844.81	8792.83	8347.11	12070.2	1.29648	5.6106e-08	3.5282e-07	12.189	3.6075	up	0
POS_6346	1-Dodecanoyl-sn-glycero-3-phosphocholine	Glycerophospholipids	Glycerophosphocholines	74457.1	62850	79117.8	63029.6	61341.6	66070.7	22519	19081.8	18561.6	20700.7	19172.3	20161.8	1.3009	2.1386e-08	1.5064e-07	3.385	1.7592	up	0
POS_3418	2,4-Dihydroxyheptadecyl acetate	Fatty Acyls	Fatty alcohols	50126.7	43143.1	69760.3	111115	69690.3	38551	144365	104799	149046	132540	122599	128472	1.14457	0.00037441	0.00083221	0.4891	-1.0318	down	0
POS_5412	[1,3-Dihydroxy-1-(7-methoxy-2-oxochromen-6-yl)-3-methylbutan-2-yl] (E)-2-methylbut-2-enoate	Coumarins and derivatives	0	2008.76	2801.07	3420.6	3575.54	1681.51	1365.68	17108.2	18003.4	19695	11738.3	19396.3	21043.9	1.27785	6.4627e-07	2.8726e-06	0.13883	-2.8486	down	0
POS_615	Tropine	Alkaloids and derivatives	0	689634	847013	1.10447e+06	721974	762887	646411	370957	487869	309958	506852	364858	279292	1.13579	0.0003655	0.0008162	2.0573	1.0407	up	C06173
POS_1333	3-n-Butylphathlide	Others	0	2419.5	2536.3	4022.02	3210.44	916.507	3280.16	8674.58	8785.69	9824.61	9131.24	6689.14	8935.88	1.26473	2.0319e-06	7.7554e-06	0.31485	-1.6673	down	0
POS_6223	Mundulone	Isoflavonoids	Isoflavans	4553.3	3789.63	5562.08	6200.61	4493.43	5316.96	16897.8	13463	13785.3	15283.8	11238.1	15458.4	1.27729	8.8015e-07	3.794e-06	0.34735	-1.5255	down	0
NEG_8385	(6,6-Dimethylbicyclo[3.1.1]hept-2-yl)methyl 6-O-[(2R,3R,4R)-3,4-dihydroxy-4-(hydroxymethyl)tetrahydro-2-furanyl]-beta-D-glucopyranoside	Prenol lipids	Terpene glycosides	955.669	716.498	806.232	798.431	719.485	486.176	519.279	133.943	136.522	436.795	288.752	239.191	1.11934	0.00050542	0.0010905	2.5549	1.3533	up	0
NEG_3261	8-(2-Oxo-5-pent-2-enylcyclopent-3-en-1-yl)octanoic acid	Fatty Acyls	Eicosanoids	10013.1	13374.8	15998.6	15312.6	16365.9	14980.2	51927.8	45478.2	49297.5	49523.2	51208.2	49768.3	1.32097	1.3565e-10	2.8879e-09	0.28952	-1.7883	down	0
NEG_3683	FA 18:3;2O	Fatty Acyls	Fatty acids and conjugates	12716	11127.6	13100.2	11431.9	10293.9	9746.17	37899.7	30409.4	31674.4	35284.3	31382.3	33831.8	1.30975	8.8754e-09	7.5662e-08	0.34126	-1.5511	down	0
NEG_3142	Salicin	Organooxygen compounds	Carbohydrates and carbohydrate conjugates	1119.24	1269.23	1288.8	1220.92	1355.87	1673.6	192.192	319.071	365.49	86.6212	550.274	321.971	1.26916	1.4845e-06	5.9011e-06	4.3188	2.1106	up	C01451
POS_3240	2-Monomyristin	Glycerolipids	Monoradylglycerols	4.21232e+06	3.11108e+06	4.38376e+06	3.67717e+06	3.37129e+06	3.93752e+06	804482	705180	742723	802992	645560	726512	1.29951	3.2842e-08	2.1698e-07	5.1256	2.3577	up	0
POS_8809	3-{7-[5-(1-hydroxynonadec-4-en-1-yl)oxolan-2-yl]heptyl}-5-methyl-5H-furan-2-one	Others	0	1.44173e+06	821447	1.34577e+06	977596	812608	957925	450485	233665	270439	347255	314121	322203	1.19042	7.2886e-05	0.00018821	3.2799	1.7137	up	0
POS_6059	Taraxasterol	Prenol lipids	Triterpenoids	33741.4	72907.7	58072.6	60399.7	47891.6	62201.3	204245	186661	185384	194911	198000	158164	1.30125	2.8015e-08	1.89e-07	0.29734	-1.7498	down	0
NEG_2615	Formononetin	Isoflavonoids	O-methylated isoflavonoids	38266.7	31750.5	37506	36858.9	32935.7	36433.6	94694.7	81881.4	88085.1	87417.1	86580.8	87347.9	1.32042	1.5719e-10	3.2041e-09	0.40637	-1.2991	down	C00858
POS_7501	Cyclo(VVFF)	Carboxylic acids and derivatives	Amino acids, peptides, and analogues	49995.9	37085.2	51781.4	45073.8	40406.5	42215.8	102429	85246.3	91349	82513.7	95277.5	100464	1.28863	2.7537e-07	1.3391e-06	0.47832	-1.0639	down	0
POS_8705	(2R,3E)-4-[(1S,6R)-1-Hydroxy-2,2,6-trimethyl-4-oxocyclohexyl]-3-buten-2-yl 6-O-beta-D-xylopyranosyl-beta-D-glucopyranoside	Fatty Acyls	Fatty acyl glycosides	133270	109063	134887	124714	115772	121325	66055.6	51527.9	56419.7	60952.6	57595.4	55992.9	1.29493	5.5112e-08	3.4965e-07	2.1203	1.0843	up	0
NEG_5563	Lactose	Others	0	3.89212e+06	3.56754e+06	5.38269e+06	5.28875e+06	4.31909e+06	4.89594e+06	3.06547e+07	3.68476e+07	5.94761e+07	2.87043e+07	4.01222e+07	3.62072e+07	1.22528	1.9259e-05	5.6079e-05	0.11787	-3.0848	down	0
NEG_11723	Rhamnetin 3-sophoroside	Flavonoids	Flavonoid glycosides	386814	195073	651713	459814	585175	282213	1641.64	1304.4	1574.75	1225.02	1591.73	1728.92	1.16822	0.00014011	0.00033809	282.45	8.1418	up	0
NEG_4520	Trehalose	Organooxygen compounds	Carbohydrates and carbohydrate conjugates	5.10251e+06	4.52595e+06	7.18291e+06	6.79221e+06	5.55642e+06	5.72219e+06	3.61143e+07	4.20221e+07	6.97087e+07	3.94609e+07	4.74479e+07	3.81872e+07	1.22975	1.5427e-05	4.5475e-05	0.1278	-2.968	down	C01083
POS_7328	(1R,2S,4R,5R)-5-Hydroxy-1,7,7-trimethylbicyclo[2.2.1]hept-2-yl 6-O-[(2R,3R,4R)-tetrahydro-3,4-dihydroxy-4-(hydroxymethyl)-2-furanyl]-beta-D-glucopyranoside	Prenol lipids	Terpene glycosides	11160.2	11869.5	24081.6	19887.8	11979.6	11530.6	30171.1	31996.7	32950.1	31367.1	35942.1	30003.2	1.21305	3.6719e-05	0.00010226	0.47035	-1.0882	down	0
POS_6354	Barbaloin	Benzenoids	0	8345.05	7554.53	8370.51	8097.4	7747.49	7954.3	27294.3	23058.9	25135.1	24394.5	24112.6	26292.9	1.32132	1.3461e-10	2.8879e-09	0.31985	-1.6445	down	0
POS_6700	Vindoline	Others	0	14327.8	14640.6	14305	14278.4	13458.8	12450.3	39062.3	28325.3	31910.1	35419.1	29591.7	31926.5	1.28491	4.6387e-07	2.1365e-06	0.42531	-1.2334	down	0
NEG_5891	Benzyl alcohol + Hex-Pen	Organooxygen compounds	Carbohydrates and carbohydrate conjugates	22922.8	20442.7	19658.4	20068.2	20099.8	19438.9	53747.6	44027.5	45764.9	51020	45688	47416.5	1.30868	9.2719e-09	7.7916e-08	0.4263	-1.2301	down	0
NEG_770	Umbelliferone	Coumarins and derivatives	Hydroxycoumarins	8303.7	7739.05	9809.97	9249.98	8334.1	8788.87	125681	105410	115275	119939	108809	113863	1.32456	8.1256e-12	5.1895e-10	0.075802	-3.7216	down	C09315
POS_10544	Thalsimine	Tannins	0	65521	47351.1	81691.6	51028.7	47658.9	49526.5	201665	190347	203050	199037	181794	179487	1.31229	3.0736e-09	3.4642e-08	0.29668	-1.753	down	0
POS_598	Trigonelline	Others	0	971796	954957	1.65824e+06	1.02789e+06	1.01935e+06	826507	205264	766335	518174	735098	477058	162108	1.01895	0.0036565	0.0067235	2.2551	1.1732	up	C01004
NEG_8336	2'-Deoxyinosine triphosphate	Nucleosides, nucleotides, and analogues	Purine deoxyribonucleotides	49040.8	41933.2	51153.5	46257.4	43573.4	43629.2	176602	155695	165373	173668	161724	162678	1.32408	1.1031e-11	5.8709e-10	0.27677	-1.8533	down	0
NEG_998	cis-Aconitic acid	Carboxylic acids and derivatives	Tricarboxylic acids and derivatives	2.14415e+06	1.93496e+06	3.00677e+06	3.22567e+06	2.3807e+06	2.49148e+06	803280	809996	1.15965e+06	888300	946228	742873	1.22737	1.593e-05	4.6813e-05	2.8379	1.5048	up	C00417
NEG_7542	Hyperoside	Flavonoids	Flavonoid glycosides	71311.3	53467.4	76466.8	66270.4	56733.3	68601.9	303456	242263	251162	274551	254955	250756	1.31403	2.214e-09	2.6604e-08	0.24909	-2.0053	down	C10073
NEG_6744	Irisxanthone	Organoheterocyclic compounds	1-benzopyrans	1.49769e+06	936458	1.21883e+06	1.01726e+06	1.04753e+06	1.39255e+06	14901.3	13224.8	14148.5	14955.7	14080.4	14781.4	1.2911	1.5841e-07	8.6228e-07	82.59	6.3679	up	0
NEG_280	Maleic acid	Carboxylic acids and derivatives	Dicarboxylic acids and derivatives	416356	890604	699997	876968	737982	629611	1.77556e+06	1.66224e+06	1.9962e+06	821942	1.33011e+06	1.12134e+06	1.02855	0.0032486	0.0060197	0.48827	-1.0343	down	C01384
NEG_3995	URIDINE-5-MONOPHOSPHATE	Others	0	74319.1	66561.5	106364	88892	70860.2	83315.4	227354	217930	372570	234384	249945	218929	1.20865	4.3532e-05	0.00011974	0.32234	-1.6334	down	0
POS_4260	5-(5-Methoxycarbonyl-5,8a-dimethyl-2-methylidene-3,4,4a,6,7,8-hexahydro-1H-naphthalen-1-yl)-3-methylpentanoic acid	Prenol lipids	Diterpenoids	67711.8	53910.1	67465.6	53106.9	53103.3	49686.6	185785	150572	151577	143797	164308	175322	1.2996	6.1569e-08	3.7569e-07	0.35516	-1.4935	down	0
NEG_11114	Rutin	Flavonoids	Flavonoid glycosides	155614	132862	137778	151022	119803	138773	55611.3	50020.4	50365.5	56851.2	50201.1	54344.3	1.30377	1.8752e-08	1.3609e-07	2.6335	1.397	up	C05625
POS_5788	6-[3-[(3,4-Dimethoxyphenyl)methyl]-4-methoxy-2-(methoxymethyl)butyl]-4-methoxy-1,3-benzodioxole	Lignans, neolignans and related compounds	0	56182.3	48049.2	65307.3	55289.8	49259.7	52503.7	126737	100419	110561	99715.7	107039	112076	1.28603	4.2483e-07	1.9853e-06	0.49744	-1.0074	down	0
NEG_2683	(2r)-1-(2,4-Dihydroxyphenyl)-2-(4-methoxyphenyl)propan-1-one	Flavonoids	0	199159	170959	186251	193522	167131	190599	585329	513933	567740	564201	552522	568014	1.32371	1.3846e-11	6.3166e-10	0.33046	-1.5974	down	0
NEG_4093	Dihidroprotolichesterinic acid	Organoheterocyclic compounds	Gamma butyrolactones	66689.2	109917	60206.4	67904.1	95585.2	95244.3	136312	282497	185852	158041	223315	182007	1.10671	0.00060436	0.0012866	0.42426	-1.237	down	0
NEG_9981	Dronedarone	Organooxygen compounds	Carbonyl compounds	36983.2	39783.8	35153.4	33140.9	36192	35555.1	176194	242296	242181	223596	242296	244879	1.30462	7.8062e-09	6.7985e-08	0.15809	-2.6612	down	0
NEG_2404	Palmitic acid	Fatty Acyls	Fatty acids and conjugates	215407	181143	250841	218697	91624.1	210979	85726.1	92746.7	47852.8	53001.4	25389.3	54374.1	1.1493	0.00028089	0.0006407	3.2546	1.7025	up	C00249
NEG_2955	trans-Vaccenic acid	Fatty Acyls	Fatty acids and conjugates	2.51834e+06	3.45641e+06	2.52256e+06	2.59642e+06	3.31551e+06	2.69882e+06	5.0459e+06	7.28809e+06	6.33934e+06	5.45493e+06	8.2257e+06	6.32168e+06	1.20726	3.3777e-05	9.5173e-05	0.44235	-1.1767	down	C08367
NEG_2583	Magnolol	Benzenoids	Biphenyls and derivatives	16082.8	18177.7	13504.2	18840.5	17211.9	18978.6	45306.6	51017.8	52625.4	46293.7	52627.5	52877.9	1.31029	2.0011e-09	2.5562e-08	0.3418	-1.5488	down	0
NEG_8753	Phosphatidylcholine lyso 18:1	Glycerophospholipids	Glycerophosphocholines	4379.36	4451.92	3902.95	4333.64	4073.01	4572.51	7458.48	11504.5	12830	8854.48	12768.4	10163.4	1.20698	3.4207e-05	9.61e-05	0.40443	-1.306	down	0
POS_894	6-methoxyquinoline	Others	0	119054	51674	134003	115807	105059	112747	14500.7	12472.4	13377.1	7480.99	7401.33	7831.18	1.23838	9.4788e-06	2.9133e-05	10.122	3.3395	up	0
POS_6510	Luteolin-4'-o-glucoside	Flavonoids	Flavonoid glycosides	161593	66973.1	236536	159018	134931	139482	4683.81	4063.59	4149.68	3003.39	2491.96	2564.11	1.19335	6.4375e-05	0.00017084	42.876	5.4221	up	0
NEG_7610	(2S,3S)-3,5,7-Trihydroxy-2-[4-hydroxy-3-[(2S,3R,4S,5S,6R)-3,4,5-trihydroxy-6-(hydroxymethyl)oxan-2-yl]oxyphenyl]-2,3-dihydrochromen-4-one	Flavonoids	Flavonoid glycosides	369176	415980	530164	455779	428898	1.04658e+06	159357	136558	139030	149715	141487	145759	1.02683	0.0033417	0.0061683	3.7235	1.8967	up	0
NEG_8700	3,4,5-Trihydroxy-6-[5-hydroxy-2-(4-hydroxy-3-methoxyphenyl)-3-methoxy-4-oxochromen-7-yl]oxyoxane-2-carboxylic acid	Flavonoids	Flavonoid glycosides	99393.8	100936	97421.1	105656	95517.3	106470	1197.23	487.676	894.605	326.279	1036.15	1213.31	1.32649	8.8372e-14	2.1165e-11	117.43	6.8757	up	0
NEG_6752	Dihydrostilbene base + 3O, 1carboxy, O-Hex	Stilbenes	Stilbene glycosides	518297	394190	520679	493040	368601	471328	3465.78	3989.85	4271.44	3611.26	4474.78	4829.58	1.30675	8.9246e-09	7.5662e-08	112.25	6.8106	up	0
NEG_9816	Flavonol base + 4O, O-MalonylHex	Flavonoids	Flavonoid glycosides	3.067e+06	2.2209e+06	3.15057e+06	2.92697e+06	2.43291e+06	2.78358e+06	271931	209919	226511	249181	218501	240036	1.30511	1.1401e-08	9.1021e-08	11.71	3.5496	up	C12638
NEG_7061	Kaempferol 7-O-glucoside	Flavonoids	Flavonoid glycosides	430314	357649	474035	423009	352498	390966	18228.3	17421.7	16306.9	18602.8	14795.7	14913.2	1.31174	1.8372e-09	2.4445e-08	24.22	4.5981	up	0
NEG_7046	Maritimein	Flavonoids	Flavonoid glycosides	521827	460307	530653	575083	563584	566656	34004	31000.2	35242.4	32128.4	31682.1	31110.1	1.3204	5.9977e-11	1.6899e-09	16.489	4.0434	up	0
NEG_2388	Purpurin	Benzenoids	Anthraquinones	157393	134467	192372	138188	144002	154405	424.982	334.081	183.604	219.427	107.113	144.585	1.30645	6.5483e-09	6.032e-08	651.32	9.3472	up	0
NEG_8701	Quercetin-3-O-glucosyl-6''-acetate	Flavonoids	Flavonoid glycosides	1.82486e+07	1.424e+07	1.88264e+07	1.90535e+07	1.51617e+07	1.75676e+07	1.63944e+06	1.28751e+06	1.50512e+06	1.58199e+06	1.48277e+06	1.46589e+06	1.31025	3.4137e-09	3.6589e-08	11.503	3.5239	up	0
POS_7044	6-[(4E,6E)-2,3-Dihydroxy-4,6-dimethyl-7-(2,4,5-trimethyl-3,6-dioxabicyclo[3.1.0]hexan-2-yl)hepta-4,6-dien-2-yl]-4-methoxy-3,5-dimethylpyran-2-one	Fatty Acyls	Fatty alcohols	177222	103098	250672	157574	114312	130573	19843.6	17685.2	19132.9	19313.9	18865.4	19052.7	1.17944	0.00010256	0.0002552	8.1958	3.0349	up	0
POS_4210	Camptothecin	Alkaloids and derivatives	0	307834	293989	312411	309269	295921	293533	7963.57	6331.24	6949.1	6726.77	7032.36	8181.77	1.32699	1.41e-15	1.3507e-12	41.981	5.3917	up	0
POS_7767	Catalposide	Organooxygen compounds	Carbohydrates and carbohydrate conjugates	76841.7	63594.5	91214.3	72021.3	64740.8	68890	27564.8	24491.2	25086.8	23708.6	25032.7	24639.6	1.27725	4.8184e-07	2.2031e-06	2.9052	1.5386	up	0
POS_2946	Fisetin	Flavonoids	Flavones	637905	1.23037e+06	420113	627029	639757	625397	1134.09	1294.59	1204.98	1120.17	1120	1490.2	1.18437	0.00010188	0.00025416	567.7	9.149	up	C10041
POS_6079	Isolupalbigenin	Isoflavonoids	Isoflav-2-enes	98545	73633.6	122734	84244.5	75481.8	88224.3	19993.6	14358.3	16449.5	18048.4	18249.5	17592.9	1.26117	1.9663e-06	7.5349e-06	5.1853	2.3744	up	0
POS_10217	Jaslanceoside A	Prenol lipids	Terpene glycosides	103727	86285.7	110667	92525.8	90588	88417.4	543.773	116.278	460.037	484.812	444.857	615.677	1.31598	3.4575e-10	6.1339e-09	214.68	7.746	up	0
POS_8297	Maltotriose	Organooxygen compounds	Carbohydrates and carbohydrate conjugates	100195	245733	301664	138788	226584	104862	2.09036e+06	1.23856e+06	1.03801e+06	2.40169e+06	734438	592713	1.02908	0.0032626	0.006034	0.13808	-2.8565	down	0
POS_3227	Quercetin	Flavonoids	Flavones	846023	775302	989237	799421	714190	765797	111194	86632.2	102260	93624.6	99045.7	94928	1.30718	5.1134e-09	4.8987e-08	8.3207	3.0567	up	C00389
POS_7890	Scutellarioside II	Cinnamic acids and derivatives	Hydroxycinnamic acids and derivatives	142520	123788	168484	130933	119249	126301	33662.6	24349	27759.9	27842.5	24789.1	28414	1.2943	5.6348e-08	3.5282e-07	4.8633	2.2819	up	0
NEG_5518	1-O-Sinapoyl-beta-D-glucose	Cinnamic acids and derivatives	Hydroxycinnamic acids and derivatives	229322	267663	274831	236324	239948	245954	21105.7	19407.8	21210.1	19598	19576.8	21561.8	1.32005	3.1169e-11	1.1944e-09	12.2	3.6088	up	0
NEG_1048	2-Isopropylmalic acid	Fatty Acyls	Fatty acids and conjugates	2.41781e+06	1.90287e+06	2.60171e+06	2.45246e+06	1.93085e+06	1.97902e+06	882950	670780	778967	801842	765930	807207	1.27425	6.4769e-07	2.8726e-06	2.8219	1.4967	up	0
NEG_1229	3-Hydroxysuberic acid	Hydroxy acids and derivatives	Medium-chain hydroxy acids and derivatives	77960.5	71132.9	86082.6	83564.2	76143.5	68685.5	7290.2	5503.52	6769.53	7011.74	6185.88	6655.49	1.31668	2.054e-10	3.9467e-09	11.761	3.5559	up	0
NEG_7122	3,5-Dihydroxy-2-(4-hydroxyphenyl)-7-[3,4,5-trihydroxy-6-(hydroxymethyl)oxan-2-yl]oxy-2,3-dihydrochromen-4-one	Flavonoids	Flavonoid glycosides	874215	816650	791635	635952	573138	688169	147815	105827	126923	141135	129162	133433	1.28766	1.9084e-07	9.7224e-07	5.5843	2.4814	up	0
NEG_10900	3'-Galloylquercitrin	Flavonoids	Flavonoid glycosides	118646	86593.9	129555	106857	85598.5	112395	1611.84	1797.49	1394.43	707.52	1494.24	1864.17	1.29802	4.427e-08	2.8656e-07	72.116	6.1722	up	0
NEG_3122	6-Hydroxyapigenin	Flavonoids	Flavones	671502	1.21828e+06	694727	860495	789409	424084	25670.7	22376.6	19646.7	22854.8	21235.5	10681.9	1.21024	3.4754e-05	9.7353e-05	38.039	5.2494	up	C10184
NEG_3129	7,3',4',5'-Tetrahydroxyflavone	Flavonoids	Flavones	415035	1.24021e+06	355989	510572	834186	866585	897.446	1384.01	562.243	682.031	509.384	627.479	1.12936	0.00047297	0.0010228	905.63	9.8228	up	0
NEG_195	Catechol	Phenols	Benzenediols	229268	185525	248260	224815	183888	206064	2276.71	2327.02	1754.77	1987.32	1522.93	2346.78	1.31156	2.0279e-09	2.5562e-08	104.61	6.7088	up	C15571
NEG_3935	Dihydromyricetin	Flavonoids	Flavans	124372	112702	140169	124045	114515	119771	1449.55	213.77	319.048	825.99	1592.76	1210.32	1.32014	3.7122e-11	1.3171e-09	131.08	7.0344	up	0
NEG_3192	Eriodictyol	Flavonoids	Flavans	159334	122859	167786	152088	117042	136420	26402.8	19048.9	21843.6	23337.9	23210.4	24453	1.29562	5.7857e-08	3.5991e-07	6.1862	2.6291	up	C05631
NEG_7127	Flavanomarein	Flavonoids	Flavonoid glycosides	320607	248477	334679	302566	235973	270341	20401.2	20764.6	18581.5	34623.7	26385.5	22777.7	1.30221	2.058e-08	1.4604e-07	11.932	3.5768	up	0
NEG_6686	Flavanone base + 3O, O-Hex	Flavonoids	Flavonoid glycosides	98902.2	74291.1	104954	89344.9	77364.3	85295.8	24221.2	22133.9	22200.1	12230.9	23892.9	25961.3	1.28716	1.8161e-07	9.5395e-07	4.0581	2.0208	up	0
NEG_10778	Kaempferol-3-Glucoside-3''-Rhamnoside	Flavonoids	Flavonoid glycosides	1.2612e+06	967524	1.23817e+06	1.18188e+06	906319	1.09553e+06	463325	358944	408832	412135	417722	420390	1.27875	4.8293e-07	2.2031e-06	2.6802	1.4224	up	0
NEG_2313	N-Phenylacetylaspartic acid	Carboxylic acids and derivatives	Amino acids, peptides, and analogues	81318.2	59752.2	100530	73066.2	62571.4	61235.4	8586.22	7722.57	7403.28	7577.25	7471.12	6495.66	1.26561	1.393e-06	5.607e-06	9.6887	3.2763	up	0
NEG_2714	Phloretin	Linear 1,3-diarylpropanoids	Chalcones and dihydrochalcones	306626	244868	308308	293805	242299	279167	14813	11929	13137.8	12990.6	12673.3	13817.5	1.31473	8.1941e-10	1.2869e-08	21.107	4.3996	up	C00774
NEG_270	Pyrrolidine-2-carboxamide	Carboxylic acids and derivatives	Amino acids, peptides, and analogues	91652.8	83650.4	95326.7	93534	75625.1	87136.1	15120.9	8108.37	12290.1	10930.1	10829.5	11070.8	1.31626	3.1536e-10	5.7002e-09	7.7092	2.9466	up	0
NEG_11429	Quercetin-3,4'-O-di-beta-glucoside	Others	0	137755	107942	121934	142120	118035	144894	9816.91	9597.03	11182.4	6320.74	10031.3	8617.23	1.31252	2.7657e-09	3.1922e-08	13.906	3.7976	up	0
NEG_1887	Resveratrol	Stilbenes	0	167337	166221	144403	163643	157557	161135	36879.3	27383.5	29680.2	32636.6	29770.2	32550.6	1.32311	9.2556e-12	5.5418e-10	5.0836	2.3459	up	C03582
NEG_10467	Rhoifolin	Flavonoids	Flavonoid glycosides	97138.1	83556.5	87577.9	92656.6	90408.8	102687	601.944	559.898	483.543	776.763	366.377	616.192	1.32312	1.6021e-11	6.6733e-10	162.72	7.3463	up	0
NEG_10773	Tiliroside	Flavonoids	Flavonoid glycosides	88199.8	73715.3	84974.2	104225	57635.5	130990	18463.9	30520.1	10994.1	7900.95	14452.7	32484.5	1.19271	8.4877e-05	0.00021568	4.7009	2.2329	up	0
NEG_6749	trans-piceid	Others	0	147510	146629	136720	146144	134563	141295	30721	27280.7	28921	30184.5	28916	29354.5	1.32575	3.0606e-13	4.8171e-11	4.863	2.2818	up	0
NEG_6751	Trilobatin	Others	0	325713	226942	356402	306331	223606	279334	4722.05	3929.49	3703.16	4360.65	4190.81	4547.85	1.2894	1.4859e-07	8.2283e-07	67.507	6.077	up	0
NEG_7422	Parishin E	Others	0	126005	99593.9	137161	120600	102342	102677	48324.1	40190.6	45451.1	44045.4	43629.3	45011.6	1.27383	6.6673e-07	2.9434e-06	2.5816	1.3682	up	0
POS_3983	(3R,5R)-1,3,5-trihydroxy-4-[(E)-3-(4-hydroxyphenyl)acryloyl]oxy-cyclohexanecarboxylic acid	Organooxygen compounds	Alcohols and polyols	4005.18	3429.66	2738.45	2348.58	695.445	3089.49	7335.42	5329.66	7527.21	7349.44	11807	8796.82	1.1418	0.00033884	0.0007602	0.3387	-1.5619	down	0
POS_6265	(5-Benzoyloxy-4,6-dihydroxy-3-methoxycyclohexen-1-yl)methyl benzoate	Benzenoids	Benzoic acids and derivatives	14714.4	15545.8	23044.9	19845	17618.7	20533.7	2269.84	1655.78	2054.79	2532.53	1714.09	2347.81	1.28622	1.8242e-07	9.5395e-07	8.8512	3.1459	up	0
POS_1458	Methylecgonine	Alkaloids and derivatives	0	18467.7	20366.4	21946.1	18506.7	17695.7	18646.2	9875.93	8744.99	8974.65	10132.4	8760.07	7767.92	1.29299	7.0241e-08	4.1795e-07	2.1312	1.0916	up	0
NEG_4146	1-(4-Hydroxyphenyl)-3-[(2R,3R,4S,5S,6R)-3,4,5-trihydroxy-6-(hydroxymethyl)oxan-2-yl]oxypropan-1-one	Fatty Acyls	Fatty acyl glycosides	12563.5	6428.04	7555.96	6677.24	7602.47	8727.96	43694	31929	37893	39108.2	36542.9	39365	1.30669	1.5329e-08	1.1748e-07	0.21684	-2.2053	down	0
NEG_4870	3-(2-Glucosyloxy-4-methoxyphenyl)propanoic acid	Organooxygen compounds	Carbohydrates and carbohydrate conjugates	24962.3	21440.4	26049.7	25112.9	22195.9	18319.1	8053.53	7669.58	8038.31	8562.45	7738.49	7797.15	1.28591	1.9301e-07	9.7318e-07	2.8851	1.5286	up	0
NEG_7493	Hydrangeifolin I	Organooxygen compounds	Carbohydrates and carbohydrate conjugates	4149.55	4867.74	5141.18	4554.39	4052.42	5426.45	18568	15853.8	16628.2	17648	16692.9	16795.8	1.32132	8.7813e-11	2.157e-09	0.27589	-1.8579	down	0
POS_6169	Pelargonidin 3-glucoside	Flavonoids	Flavonoid glycosides	744802	304484	374214	1.42551e+06	450111	988194	1091.6	500.633	456.746	518.541	449.61	479.72	1.05141	0.0023466	0.0044167	1226	10.26	up	0
NEG_10772	[6-[2-(3,4-Dihydroxyphenyl)-8-hydroxy-4-oxochromen-7-yl]oxy-3,4,5-trihydroxyoxan-2-yl]methyl (E)-3-(4-hydroxyphenyl)prop-2-enoate	Flavonoids	Flavonoid glycosides	295288	948901	240867	473445	1.02591e+06	605074	929.571	1436.97	771.304	504.759	537.149	439.287	1.08261	0.0012365	0.0024678	777.1	9.602	up	0
NEG_10780	Cyanidin 3-O-rutinoside	Flavonoids	Flavonoid glycosides	3.52475e+06	2.64816e+06	1.31575e+06	3.19684e+06	2.20327e+06	8.09934e+06	925.604	4946.66	638.007	631.72	1623.25	3035.17	1.00449	0.0049158	0.0087559	1778.6	10.797	up	C08620
NEG_7124	Eriodictyol-7-O-glucoside	Flavonoids	Flavonoid glycosides	55881.4	50000.6	64636.6	54085.6	55344.3	54026.4	5855.09	5245.49	4342	2874.8	5410.73	5115.43	1.31647	2.3488e-10	4.412e-09	11.579	3.5334	up	0
NEG_3467	Salicylic acid glucoside	Organooxygen compounds	Carbohydrates and carbohydrate conjugates	64711.4	74014.6	67066.4	69525.1	70161.2	68944.8	29965.5	33133	31769.8	29184.6	30363.4	29414.7	1.3197	1.0989e-10	2.5676e-09	2.2544	1.1727	up	0
NEG_1532	N-Acetyl-L-phenylalanine	Carboxylic acids and derivatives	Amino acids, peptides, and analogues	76526.2	44630.1	69865.8	58523.5	41890.5	53331.4	26380.4	23533.1	23091.7	25283.2	24216.8	22782.1	1.17065	0.00015082	0.00036121	2.373	1.2467	up	C03519
POS_3238	Methyltestosterone	Steroids and steroid derivatives	Androstane steroids	213575	192704	187402	183777	207001	182595	596736	607750	631484	594175	577847	580812	1.3243	1.3883e-12	1.4778e-10	0.32519	-1.6206	down	C07198
NEG_4237	(Z)-5,8,11-Trihydroxyoctadec-9-enoic acid	Fatty Acyls	Fatty acids and conjugates	28355.7	21860.9	29937.8	27672.6	26127.1	24922.3	140013	99825.7	107866	116130	109355	116351	1.30507	2.6236e-08	1.8082e-07	0.23041	-2.1177	down	0
NEG_8969	Isochlorogenic acid B	Others	0	495850	384921	494915	456847	355659	388191	59231.2	51648.9	55676.2	57651.5	54150.5	51900.1	1.29919	3.4399e-08	2.2571e-07	7.8011	2.9637	up	0
POS_2487	Lofexidine	Benzenoids	Halobenzenes	364182	272191	435537	320826	283004	313036	166081	118864	139447	139038	132181	149032	1.21895	2.1044e-05	6.1093e-05	2.3546	1.2355	up	0
NEG_444	Adenine	Organoheterocyclic compounds	Purines and purine derivatives	17724.4	16660.4	18234.6	17616	16033.2	18263.2	72685.8	56938.8	65209.4	70336.9	66751.9	71040.9	1.31612	1.3252e-09	1.9236e-08	0.25941	-1.9467	down	C00147
NEG_2605	Adenosine	Nucleosides, nucleotides, and analogues	0	14124.1	13767.1	15116.1	13489.5	13180.2	14371.3	64364.6	48997.3	56801.9	59132.7	59428	61844.3	1.31555	1.7767e-09	2.3973e-08	0.23975	-2.0604	down	C00212
NEG_1903	Myristic acid	Fatty Acyls	Fatty acids and conjugates	142453	151640	132541	155197	139268	154144	50562.5	70668.6	64565.8	55629.4	65267.1	56345.4	1.3108	7.3708e-09	6.5382e-08	2.4109	1.2696	up	C06424
POS_6623	4'-O-b-D-Glucosyl-5-O-methylvisamminol	Organoheterocyclic compounds	1-benzopyrans	6725.38	2514.56	7403.79	6126.71	4944.61	6008.28	27404.5	24873.9	30068.6	31273.5	27460.9	26464.2	1.31062	4.1223e-09	4.2464e-08	0.20128	-2.3127	down	0
POS_974	1-Deoxynojirimycin	Others	0	10894.8	11827.3	10543.5	10203.8	10068.5	17898.8	106943	60884.1	80712.2	56157.4	95923.1	79201	1.24786	7.4883e-06	2.3754e-05	0.14888	-2.7478	down	0
POS_3096	Methyl linoleate	Others	0	26696.2	23989	52495.5	27588.5	20695	20838.9	599604	602329	649647	636738	654964	634952	1.32632	8.3787e-14	2.1165e-11	0.045604	-4.4547	down	0
NEG_3234	(-)-Epicatechin	Flavonoids	Flavans	7894.1	7434.99	2971.94	8351.68	6552.34	4163.58	318903	248829	284530	293639	290949	295006	1.323	3.6315e-11	1.3171e-09	0.021577	-5.5343	down	C09727
NEG_13716	3-[6-[[(2R,3R,4R,5S,6S)-3,5-Dihydroxy-6-methyl-4-[(2S,3R,4R,5R,6S)-3,4,5-trihydroxy-6-methyloxan-2-yl]oxyoxan-2-yl]oxymethyl]-3,4,5-trihydroxyoxan-2-yl]oxy-2-(3,4-dihydroxyphenyl)-5,7-dihydroxychromen-4-one	Flavonoids	Flavonoid glycosides	202533	180068	207613	194249	169232	175046	17991.1	16117.1	16999.9	10982	16231.4	16699.5	1.3184	1.2499e-10	2.7847e-09	11.879	3.5703	up	0
NEG_621	3,4-Dihydroxybenzoic acid	Benzenoids	Benzoic acids and derivatives	301240	246867	311344	287503	256884	272298	2860.11	3028.64	2508.05	3022.62	3989.93	2720.75	1.31878	1.1911e-10	2.7169e-09	92.45	6.5306	up	C00230
NEG_6370	Mangiferin	Organoheterocyclic compounds	1-benzopyrans	156987	131915	149778	157788	141949	139062	4117.2	6046.68	5290.6	3885.52	6255.1	6202.3	1.32236	1.4711e-11	6.4061e-10	27.596	4.7864	up	0
NEG_8643	Melezitose	Organooxygen compounds	Carbohydrates and carbohydrate conjugates	374237	321488	552810	490357	373085	399741	2.33279e+06	2.25423e+06	3.75141e+06	2.47416e+06	2.6989e+06	2.04851e+06	1.24893	5.7236e-06	1.865e-05	0.16142	-2.6311	down	C08243
NEG_1184	Methyl gallate	Benzenoids	Benzoic acids and derivatives	124434	97413.7	139850	131171	106108	112514	1662.38	1410.51	2333.86	1968.83	1256.08	1769.38	1.307	6.5226e-09	6.032e-08	68.406	6.096	up	0
NEG_9829	Raffinose	Organooxygen compounds	Carbohydrates and carbohydrate conjugates	785435	649480	1.20226e+06	1.07005e+06	767540	846143	4.91484e+06	4.74279e+06	7.731e+06	5.22857e+06	5.81228e+06	4.3366e+06	1.2551	3.8459e-06	1.3301e-05	0.16239	-2.6225	down	C00492
POS_6847	Delphinidin 3-glucoside	Flavonoids	Flavonoid glycosides	86940.4	74409	57649	101396	109057	75036.9	4437.08	6114.36	2301.26	3399.53	2276.66	4132.27	1.27127	1.1896e-06	4.8704e-06	22.262	4.4765	up	0
POS_8894	Quercetin 3-O-malonylglucoside	Flavonoids	Flavonoid glycosides	609657	501223	705349	582939	540073	544721	177030	145761	154512	151772	150856	159321	1.29477	5.3866e-08	3.4403e-07	3.7093	1.8911	up	0
NEG_7482	Kaempferol 3-glucuronide	Flavonoids	Flavonoid glycosides	84921.8	62810.2	83681.1	99423.7	38022.4	75183.8	4870.04	4320.68	4504.67	3516.06	3468.34	4571.9	1.23627	1.1739e-05	3.5364e-05	17.585	4.1362	up	0
NEG_6753	Phlorizin	Flavonoids	Flavonoid glycosides	76055.7	59689.1	78533.3	77147.5	57160.1	68868.9	7803.92	6429.08	6195.13	7218.94	7361.56	5941.28	1.30434	1.4069e-08	1.0869e-07	10.194	3.3497	up	C01604
POS_5732	1-[4-[2-(7-Methoxy-1,3-benzodioxol-5-yl)ethyl]phenoxy]-3-methylbutane-2,3-diol	Stilbenes	0	14868.9	14628.8	11938.9	12031.3	15247.2	13231.2	31160.9	27370.9	27865.6	25910.8	28857.7	23013.9	1.27466	8.0741e-07	3.5e-06	0.49913	-1.0025	down	0
POS_4092	2-[(2'R,8R,8aS)-2',4,4,7,8a-Pentamethylspiro[2,3,4a,5-tetrahydro-1H-naphthalene-8,5'-oxolane]-2'-yl]acetic acid	Prenol lipids	Diterpenoids	7376.79	7981.27	5704.86	4154.74	7736.67	4630.37	43031	38961.6	37171.5	37918.6	39128.6	37588.7	1.32154	4.4841e-11	1.3857e-09	0.16076	-2.6371	down	0
POS_6664	5‐(1‐benzofuran‐2‐yl)‐N,N‐dimethyl‐2‐[4‐(piperazin‐1‐yl)phenyl]‐1,3‐thiazole‐4‐carboxamide	Organoheterocyclic compounds	Piperazines	730.183	558.13	1392.72	520.652	1167.6	562.038	3837.01	3132.8	3316.07	2951.91	3068.18	3123.59	1.29027	2.5456e-07	1.2506e-06	0.2538	-1.9782	down	0
NEG_99	2-Butyne-1,4-diol	Organooxygen compounds	Alcohols and polyols	831912	747754	1.18175e+06	1.25817e+06	924283	952577	368076	388061	510846	408947	438823	366831	1.20091	4.9933e-05	0.00013628	2.3761	1.2486	up	0
NEG_4161	9,10-Dihydroxy-8-oxooctadec-12-enoic acid	Fatty Acyls	Lineolic acids and derivatives	44168.3	32422.2	45411.9	42570.6	35681.4	37868.7	167086	126494	150619	143913	153182	156377	1.31243	4.7187e-09	4.6128e-08	0.26527	-1.9145	down	0
POS_6221	6-O-Isobutyryl-alpha-D-glucopyranosyl alpha-D-glucopyranoside	Organooxygen compounds	Carbohydrates and carbohydrate conjugates	39050.2	33238.9	40011.2	35105.5	31915.8	35795.7	5488.45	5328.61	6464.88	6188.01	5039.53	6097.24	1.31526	5.8007e-10	9.4188e-09	6.2161	2.636	up	0
POS_6081	Majdine	Organoheterocyclic compounds	0	15854.2	15804.7	20877.9	15883.3	16034.5	15519.5	51032.7	46076.5	48334.3	48010.3	46852.9	52864.1	1.31943	3.924e-10	6.7129e-09	0.34101	-1.5521	down	0
POS_10392	(1beta,3beta,9xi,11alpha,14xi)-1,3,11-Trihydroxyfurosta-5,20(22),25-trien-27-yl beta-D-glucopyranoside	Steroids and steroid derivatives	Steroidal glycosides	257800	204599	283531	241009	218523	223664	18448	15695.9	16795.5	15343.3	15401.5	17202.4	1.30866	3.9716e-09	4.1357e-08	14.452	3.8532	up	0
POS_1222	12-Hydroxydodecanoic acid	Hydroxy acids and derivatives	Medium-chain hydroxy acids and derivatives	49661.4	45296.7	57290	50569.8	46546.8	44009.3	132564	100466	115629	108160	100993	97593.3	1.27718	9.7805e-07	4.1546e-06	0.44762	-1.1596	down	C08317
POS_4238	2',5,6-Trimethoxyflavone	Flavonoids	O-methylated flavonoids	389797	423704	625651	450925	435165	360849	98283.1	259481	60258	225013	130778	128687	1.17706	0.0001239	0.00030127	2.9763	1.5735	up	0
POS_3298	5,7-Dimethoxyflavanone	Flavonoids	O-methylated flavonoids	59372.2	51969.4	126706	58503.3	60603.4	42376.2	361847	544034	346500	572927	477565	375703	1.24922	4.0588e-06	1.3887e-05	0.14916	-2.7451	down	0
POS_2511	8-Hydroxy-9,10-epoxystearic acid	Fatty Acyls	Lineolic acids and derivatives	258917	165816	257241	245188	196873	214151	150079	60987	59900.9	98259.2	114836	59858.3	1.17747	0.00010941	0.00027084	2.4603	1.2988	up	0
POS_4087	beta-Lactose	Organooxygen compounds	Carbohydrates and carbohydrate conjugates	21885.8	28025.4	84785.5	26937.4	26331.7	28250.7	126111	200287	123506	111032	158543	73485.7	1.10179	0.00076455	0.0015922	0.27267	-1.8748	down	C01970
POS_6961	Monotropitoside	Organooxygen compounds	Carbohydrates and carbohydrate conjugates	24715.6	20630.8	26968.6	25558.7	21613.2	23521.4	90262.4	77274.6	84368.9	84935.1	81513	82521.8	1.3227	4.3905e-11	1.3857e-09	0.28552	-1.8084	down	0
POS_821	Nerol	Prenol lipids	Monoterpenoids	106296	112409	130257	112000	95667.2	103693	352629	266635	292365	245721	264677	253718	1.27239	1.4195e-06	5.69e-06	0.39405	-1.3436	down	C09871
POS_4512	Palatinose	Organooxygen compounds	Carbohydrates and carbohydrate conjugates	975849	848278	1.96514e+06	898427	984960	774258	5.5613e+06	7.99504e+06	5.09497e+06	8.17342e+06	6.88894e+06	5.40318e+06	1.2539	3.0012e-06	1.0609e-05	0.16481	-2.6011	down	0
POS_5756	Stigmasterol	Steroids and steroid derivatives	Stigmastanes and derivatives	87056.6	85819.4	90692.2	86610.3	77990.7	96483	1.02535e+06	870364	972217	951329	969468	1.09258e+06	1.32238	5.0728e-11	1.5187e-09	0.089207	-3.4867	down	0
POS_7827	Verrucarin J	Prenol lipids	Sesquiterpenoids	56446.9	40307.7	69410.5	55998.6	46923.3	38911.7	2175.98	2343.74	1976.88	1790.88	1633.5	1444.57	1.2689	1.0538e-06	4.428e-06	27.099	4.7602	up	0
NEG_3341	13-HoTrE	Fatty Acyls	Lineolic acids and derivatives	56124.8	108089	55043	57845.5	48931.6	56445	433133	414955	427421	431426	437583	424874	1.32398	3.5164e-12	2.8072e-10	0.14886	-2.748	down	0
NEG_1339	2,4-Dihydroxy-6-propylbenzoic acid	Benzenoids	Benzoic acids and derivatives	103524	93184.5	102557	101985	91031.6	102396	2496.29	1924.91	2202.35	1812.77	2639.12	2386.39	1.32488	1.078e-12	1.2909e-10	44.175	5.4652	up	0
NEG_4953	3-O-Acetylpadmatin	Flavonoids	O-methylated flavonoids	51523.3	55269.4	47574	55835.4	51550.7	54904.1	146303	119330	140300	133882	139457	139957	1.31557	1.4133e-09	1.9901e-08	0.38653	-1.3713	down	0
NEG_8971	3,5-Dicaffeoylquinic acids	Organooxygen compounds	Alcohols and polyols	1.55336e+06	1.39851e+06	1.72399e+06	1.4982e+06	1.44202e+06	1.4426e+06	169021	142157	141717	140256	145337	137650	1.31886	7.2611e-11	1.8306e-09	10.339	3.3701	up	0
NEG_4498	Boscalid	Benzenoids	Diphenylmethanes	53727.6	43099.6	54855.2	51204.4	43590.3	47045.1	360.642	363.052	256.358	315.229	195.353	198.772	1.316	4.5614e-10	7.6663e-09	173.74	7.4408	up	0
NEG_1080	Caffeic acid	Cinnamic acids and derivatives	Hydroxycinnamic acids and derivatives	209926	130024	166741	174987	130708	195706	26340.3	23624.6	25171.7	24577	25743	25749.8	1.2754	9.0428e-07	3.8674e-06	6.667	2.737	up	C01481
NEG_1079	cis-Caffeic acid	Cinnamic acids and derivatives	Hydroxycinnamic acids and derivatives	151002	115482	145956	147185	114867	129415	49143.6	41041.6	47694.3	48036.7	48587	51887.3	1.28775	1.8125e-07	9.5395e-07	2.807	1.489	up	0
NEG_4762	Cryptochlorogenic acid	Organooxygen compounds	Alcohols and polyols	8.69043e+06	5.96558e+06	7.28226e+06	7.42858e+06	5.65469e+06	6.65246e+06	2.3007e+06	1.87881e+06	2.13989e+06	2.27645e+06	2.0947e+06	2.36766e+06	1.27157	1.0711e-06	4.4612e-06	3.1914	1.6742	up	0
NEG_7486	Hispidulin 4'-glucoside	Flavonoids	Flavonoid glycosides	61469.6	53324.7	55486	61618	50309.5	60395.1	2297.72	1915.2	1839.27	1388.98	2026.41	1836.01	1.321	6.9247e-11	1.7929e-09	30.309	4.9217	up	0
NEG_3461	Hydroxygenkwanin	Others	0	86364.7	69108.6	83933.7	83440.5	68576.2	78100.6	16572.7	15308.2	16047.5	16061.3	13738.8	16632.9	1.31111	2.7349e-09	3.1922e-08	4.9758	2.3149	up	0
NEG_11397	Isorhamnetin-3-O-galactoside-6''-rhamnoside	Others	0	79349.1	65253.3	74965.4	71308.5	66236.3	65899.7	3342.37	2457.27	1075.4	582.535	3057.57	899.18	1.32008	6.4157e-11	1.7561e-09	37.06	5.2118	up	0
NEG_4759	Neochlorogenic acid	Organooxygen compounds	Alcohols and polyols	2.68651e+06	1.64353e+06	3.00837e+06	2.55559e+06	1.67713e+06	2.04797e+06	989220	617369	911205	826008	802785	858409	1.17486	0.00011861	0.00028986	2.7211	1.4442	up	C17147
NEG_1815	Olivetolic acid	Benzenoids	Benzoic acids and derivatives	146828	139396	133450	152623	136837	154428	16476.8	15183.6	16206.6	16682.8	16863.5	17813.1	1.32405	6.7527e-12	4.6208e-10	8.7029	3.1215	up	0
NEG_457	Threonic acid	Organooxygen compounds	Carbohydrates and carbohydrate conjugates	137109	158818	147457	155614	174924	164476	46149.5	50756.1	55579.4	62955.1	38118.7	38779.3	1.30353	1.7473e-08	1.2876e-07	3.21	1.6826	up	C01620
POS_3618	Isobavachalcone	Linear 1,3-diarylpropanoids	Chalcones and dihydrochalcones	122592	90488.6	121313	106403	95747.6	102405	54118.5	41954	46347.8	46531.2	47290.4	48142.5	1.27008	9.8592e-07	4.1608e-06	2.2468	1.1679	up	C08648
POS_3518	Phytosphingosine	Organonitrogen compounds	Amines	36379.6	34283.3	39842.2	39106.8	33246.6	36747.4	80369.6	68550.3	74840.8	70699.2	73591.8	76606.4	1.31256	4.3993e-09	4.3902e-08	0.49388	-1.0178	down	C12144
NEG_3375	9-Hydroxy-10E,12Z-octadecadienoic acid	Fatty Acyls	Lineolic acids and derivatives	50299	83464.4	79966.8	86348.2	54902.7	83744.8	207778	199627	192991	144498	209712	196382	1.26767	1.5285e-06	6.026e-06	0.38117	-1.3915	down	0
NEG_4158	9,12,13-Trihydroxyoctadeca-10,15-dienoic acid	Fatty Acyls	Lineolic acids and derivatives	26214.1	20609.4	18922.5	17293.9	14789.6	23029.3	66547.2	50979.2	59612.7	58463.7	40543.8	57840.5	1.25447	4.7038e-06	1.5756e-05	0.36187	-1.4665	down	0
NEG_5603	cis-Piceid	Stilbenes	Stilbene glycosides	71104.2	67023	65674.1	67399.5	64326.6	66088	16805.1	14462.2	15215.3	15509.4	14735.3	16342.6	1.32563	2.1574e-13	4.1335e-11	4.3152	2.1094	up	0
NEG_7928	Isorhamnetin-3-O-glucoside	Flavonoids	Flavonoid glycosides	65611.5	54334.8	70706.1	57856.1	48516.2	54903.3	1386.5	1301.34	1494.83	1657.87	1755.97	2140.57	1.30548	9.3824e-09	7.8159e-08	36.143	5.1756	up	0
NEG_2863	Linoleic acid	Fatty Acyls	Lineolic acids and derivatives	477110	645935	624754	546362	690157	571843	957212	1.96384e+06	1.36344e+06	1.0217e+06	1.78103e+06	1.02777e+06	1.05583	0.0016841	0.0032926	0.43822	-1.1903	down	C01595
NEG_3131	Luteolin	Flavonoids	Flavones	755588	689299	785620	729237	687079	718188	393562	334837	351022	369182	358679	358123	1.31142	1.4282e-09	1.9901e-08	2.0158	1.0113	up	C01514
NEG_13570	PG 34:2	Others	0	2.15258e+06	2.57855e+06	2.37454e+06	1.98493e+06	1.61808e+06	1.49985e+06	899621	1.03523e+06	987923	863619	798159	1.06285e+06	1.1796	0.00010504	0.00026071	2.1618	1.1122	up	0
NEG_10462	Procyanidin B2	Flavonoids	Biflavonoids and polyflavonoids	233.399	587.526	591.02	410.335	1071.55	215.628	54539	43591.8	47870.8	49251.4	49753.5	48176.8	1.32406	1.3724e-11	6.3166e-10	0.010606	-6.559	down	C17639
NEG_6982	Quercitrin	Flavonoids	Flavonoid glycosides	95212.6	81292.4	86059.1	89878.6	80763.5	99126.9	30479.8	27950.8	30641.7	29865.8	30774.5	28883.2	1.31191	3.2456e-09	3.5739e-08	2.9807	1.5756	up	C01750
POS_2926	2,3-Dihydroxypropyl tetradecanoate	Glycerolipids	Monoradylglycerols	90537.4	117859	83251.4	139159	70136.4	89600.1	52093.5	36561.3	36337.4	37515.3	33040	40829.2	1.15202	0.00025503	0.0005845	2.4983	1.321	up	0
POS_2954	Dihydro-3-methylene-4-[(2E)-3-methyl-4-(tetrahydro-4-methyl-5-oxo-2-furanyl)-2-buten-1-yl]-, (4R)-2(3H)-furanone,	Prenol lipids	Terpene lactones	105214	43827.2	78425.3	70569.9	46454	97529	21182.8	15938.1	16213.7	18019.8	17474.9	16911.2	1.14874	0.00030655	0.00069101	4.1802	2.0636	up	0
POS_3157	Nephrosteranic acid	Organoheterocyclic compounds	Gamma butyrolactones	37397	31597	40413.3	31465.6	30152	28603.9	78445.2	66127.1	76450.9	74955	72200.9	75932.4	1.30604	2.2092e-08	1.5448e-07	0.4495	-1.1536	down	0
NEG_6382	Mulberrin	Flavonoids	Flavones	43014.6	45547.3	40250.3	47299.2	44910.8	48018.9	882.492	1365.85	1129.64	1212.09	1010.27	3975.52	1.32325	1.0837e-11	5.8709e-10	28.096	4.8123	up	0
NEG_2178	Uridine	Nucleosides, nucleotides, and analogues	0	193326	109085	173314	195429	186625	201774	602797	334582	344851	582192	346098	361944	1.10613	0.00086357	0.0017791	0.41188	-1.2797	down	C00299
POS_4058	Poldine	Benzenoids	Diphenylmethanes	7629.84	7833.41	10948.3	10675.1	9133.14	6029.66	32088.2	26820.6	29448.7	22033.8	29175.8	32166.8	1.2847	4.4532e-07	2.0609e-06	0.30425	-1.7167	down	0
NEG_3810	FA 18:1;2O	Fatty Acyls	Fatty acids and conjugates	16134.4	13276.7	14900.7	31578	15458.4	15109.4	50577.2	42737.9	41679.9	42465.4	44353.3	44389.5	1.24829	6.0922e-06	1.9717e-05	0.39991	-1.3222	down	0
NEG_4776	Humantenine	Others	0	4254.3	2871.4	4266.52	3405.61	5168.69	3754.79	25697.4	20884.3	23698.9	23195.5	23967.8	22289.9	1.32063	1.5365e-10	3.2e-09	0.16976	-2.5584	down	0
NEG_3039	Xanthosine	Nucleosides, nucleotides, and analogues	0	17988.1	13757.1	18946	16568.9	13418.1	15053.1	35103.5	27691.5	31820.5	36101.7	31653.4	30967.6	1.27589	9.801e-07	4.1546e-06	0.49515	-1.0141	down	C01762
POS_8101	[(2R,3S,4S,5R,6S)-3,4,5-Trihydroxy-6-[(2S,3R,4S,5S,6R)-3,4,5-trihydroxy-6-(hydroxymethyl)oxan-2-yl]oxyoxan-2-yl]methyl 8-methylnonanoate	Saccharolipids	0	6662.64	5932.33	7087	9449.05	5778.59	6719.54	55564.9	40999.1	47743.7	51453.5	46110.2	50552.8	1.31455	2.3821e-09	2.8174e-08	0.14236	-2.8124	down	0
POS_3556	6-Oxocativic acid	Prenol lipids	Diterpenoids	144532	70154.3	95855.4	98421.8	67271.6	81043.3	34794.1	25947.9	38341.1	47753.9	34034.1	44434	1.09621	0.00096931	0.0019715	2.4734	1.3065	up	0
POS_12028	gamma-Aminobutyrate	Carboxylic acids and derivatives	Amino acids, peptides, and analogues	22589.4	12704.5	18597	17507.5	11067.7	15908.9	50957.5	45466.1	63981.7	58653.4	62894.9	61915.4	1.28345	3.6659e-07	1.7472e-06	0.28608	-1.8055	down	0
NEG_10187	(2-Hydroxy-3-octadeca-9,12-dienoyloxypropyl) 2-(trimethylazaniumyl)ethyl phosphate	Glycerophospholipids	Glycerophosphocholines	249681	321545	198000	240855	297038	257976	383056	731092	560860	480989	582928	605462	1.15671	0.00017671	0.00041594	0.46798	-1.0955	down	0
NEG_1997	(E)-5-((1R,3R,6S)-2,3-Dimethyltricyclo[2.2.1.02,6]heptan-3-yl)-2-methylpent-2-enoic acid	Prenol lipids	Sesquiterpenoids	86993.5	82944	104085	128981	112413	112162	38045	43438.2	49650.9	42334.7	53402.6	32452.8	1.23562	1.221e-05	3.6669e-05	2.4201	1.275	up	0
NEG_3848	3-O-Methylquercetin	Flavonoids	O-methylated flavonoids	51619.1	44640.9	50623.9	45567.7	48213	46332.5	7231.51	8082.37	6099.05	8347.37	6957.9	6768.19	1.3224	1.2328e-11	6.2158e-10	6.5997	2.7224	up	C04443
NEG_812	4-Hydroxycinnamic acid	Cinnamic acids and derivatives	Hydroxycinnamic acids and derivatives	160844	65768.1	136864	154181	154949	69853.2	10820.4	54379.2	1464.09	55981.2	69886	69571.7	1.00961	0.0042466	0.0077343	2.8327	1.5022	up	C00811
NEG_6682	Avicularin	Flavonoids	Flavonoid glycosides	43783.8	52049.1	117060	48176.4	95185.4	57356	8762.94	7293.01	7562.71	6447.44	6782.1	7313.04	1.11752	0.00051216	0.0011026	9.3659	3.2274	up	0
NEG_1090	beta-D-Fructofuranose	Organooxygen compounds	Carbohydrates and carbohydrate conjugates	136947	121241	144517	155413	113851	136294	296404	232374	297073	250420	247506	307407	1.26544	2.5559e-06	9.3456e-06	0.49551	-1.013	down	C02336
NEG_3344	FA 19:2	Fatty Acyls	Fatty acids and conjugates	10294.3	18656	14732	11391.8	19008.3	10871.1	33606.4	88914.7	59125.3	47197	74091.6	57506.6	1.15055	0.00021178	0.00049465	0.23569	-2.085	down	0
NEG_10785	isosakuranetin-7-O-rutinoside	Others	0	124537	187846	34554.4	98751.1	216922	48803.5	838.774	1048.2	1057.58	1940.67	702.895	446.491	1.03493	0.0028142	0.0052554	117.89	6.8813	up	0
NEG_8680	Phosphatidylcholine lyso 18:2	Glycerophospholipids	Glycerophosphocholines	37681.7	50757.6	33402.3	39478.8	53211.6	44778.6	62562.6	124178	97777	84602.8	93673.1	92838.6	1.14992	0.00021222	0.00049465	0.46669	-1.0994	down	0
NEG_5852	Scopolin	Coumarins and derivatives	Coumarin glycosides	68405.9	54430.4	71536.3	70697	62056.2	58916.2	24957.4	21744.1	24018.1	23849.5	24028	24469.1	1.29434	6.3522e-08	3.8379e-07	2.6983	1.4321	up	0
POS_3265	(-)-Epitaxifolin	Flavonoids	Flavans	21925.4	17534.4	25527.8	19428.6	17323.4	17742	5203.92	3420.75	4027.01	3599.64	3916.32	3794.91	1.27997	3.5034e-07	1.6781e-06	4.9862	2.3179	up	0
POS_4314	(2,6,6-Trimethyl-4-oxo-2-cyclohexen-1-yl)methyl beta-D-glucopyranoside	Organooxygen compounds	Carbohydrates and carbohydrate conjugates	14369.8	9730.46	13321.2	8712.45	10456	13211.4	4448.68	3504.31	2430.57	3635.44	5678.63	4313.27	1.22072	2.4475e-05	7.02e-05	2.9071	1.5396	up	0
POS_7252	(2R,3S,4S,5R,6R)-2-[[(2S,3R,4R)-3,4-dihydroxy-4-(hydroxymethyl)oxolan-2-yl]oxymethyl]-6-[4-(4-hydroxyphenyl)butan-2-yloxy]oxane-3,4,5-triol	Fatty Acyls	Fatty acyl glycosides	15420.4	12285.8	13710	12958.2	10724.3	8936.71	2166.33	1875.56	2733.02	2486.03	2044.85	2602.44	1.27209	8.8315e-07	3.794e-06	5.3231	2.4123	up	0
POS_12389	(2S,3R,4S,5S,6R)-2-[4-[(3S,3aR,6S,6aR)-6-[3,5-Dimethoxy-4-[(2S,3R,4S,5S,6R)-3,4,5-trihydroxy-6-(hydroxymethyl)oxan-2-yl]oxyphenyl]-1,3,3a,4,6,6a-hexahydrofuro[3,4-c]furan-3-yl]-2,6-dimethoxyphenoxy]-6-(hydroxymethyl)oxane-3,4,5-triol	Lignans, neolignans and related compounds	0	7158.13	6535.58	7344.28	6013.3	6145.9	6066.01	236.552	175.116	289.786	255.161	531.919	193.362	1.31766	1.772e-10	3.5367e-09	23.345	4.545	up	0
POS_3633	(2S,3S)-4-Methylidene-5-oxo-2-tridecyloxolane-3-carboxylic acid	Organoheterocyclic compounds	Gamma butyrolactones	23654.8	21419.3	24097	20926.3	20240	21082.9	47962.4	41667.7	43321	43441.3	50223	45710.4	1.30496	1.8622e-08	1.3609e-07	0.48258	-1.0511	down	0
POS_3331	(3S,6R,6As,7S)-6,6a,7,8-tetrahydroxy-3-methyl-3,4,5,6,7,12a-hexahydro-2H-benzo[a]anthracene-1,12-dione	Benzenoids	0	10352.5	9561.86	11115.2	10049.7	10210.7	10999.2	672.635	5203.91	6566.45	4951.84	4744.46	5513.65	1.20494	5.4615e-05	0.00014738	2.2525	1.1715	up	0
POS_5017	(7E,13E)-9,15-Dihydroxy-4,10,16-trimethyl-1,5,11-trioxacyclohexadeca-7,13-diene-2,6,12-trione	Others	0	9777.93	7232.94	6566.36	6617.49	9633.44	7713.15	28071.5	18965.6	26106.2	20589.6	24198.9	17751.3	1.24286	9.347e-06	2.8885e-05	0.35039	-1.513	down	0
POS_5857	(E)-3-(4-Methoxyphenyl)-1-[2,4,6-trimethoxy-3-(3-methylbut-2-enyl)phenyl]prop-2-en-1-one	Linear 1,3-diarylpropanoids	Chalcones and dihydrochalcones	8163.08	6474.82	9179.09	8469.33	6918.21	7572.27	3033.03	3022.7	2966.78	2867.71	2382.31	3058.14	1.27978	4.1141e-07	1.9415e-06	2.6991	1.4325	up	0
POS_3669	(E)-4-[(1R,2S,3S,4R,8As)-2,3,4-trihydroxy-2,5,5,8a-tetramethyl-3,4,4a,6,7,8-hexahydro-1H-naphthalen-1-yl]but-3-en-2-one	Prenol lipids	Sesquiterpenoids	11238.8	8323.46	12214.8	10406.9	10179.3	10737.7	22819.1	21248	22768.9	23398.6	21485.9	24823.5	1.30612	1.5922e-08	1.201e-07	0.46213	-1.1136	down	0
POS_6035	[1-(3,4-Dihydroxy-5-methoxyphenyl)-7-(3,4-dihydroxyphenyl)heptan-3-yl] acetate	Others	Linear diarylheptanoids	16329.1	12842.2	16341.8	14530.5	14137.3	13828.3	42937	35233.7	36803.7	36294	35648.6	36670.4	1.30993	8.1177e-09	7.0061e-08	0.39362	-1.3451	down	0
POS_7676	[3,4,5-Trihydroxy-6-[(3,4,5-trihydroxyoxan-2-yl)oxymethyl]oxan-2-yl] 2,6,6-trimethylcyclohexene-1-carboxylate	Organooxygen compounds	Carbohydrates and carbohydrate conjugates	13861.6	9418.53	16831.3	11474.3	10669.7	10604.7	6772.75	5378.73	6662.08	5603.66	6217.65	5570.33	1.13811	0.00032444	0.00072961	2.0124	1.0089	up	0
POS_6966	[8-[2-(3-Methylbutanoyloxy)propan-2-yl]-2-oxo-8,9-dihydrofuro[2,3-h]chromen-9-yl] 3-methylbutanoate	Coumarins and derivatives	Furanocoumarins	1150.94	2008.94	2038.16	2725.5	868.523	2384.8	6060.54	5297.35	5938.63	5595.92	6076.03	6209.96	1.28795	2.2908e-07	1.1312e-06	0.31772	-1.6542	down	0
POS_3121	1,2-Didehydrotanshinone IIA	Prenol lipids	Diterpenoids	19563.7	15551.7	23727.1	19519.4	16077.6	17150.7	2591.6	3128.62	1988.6	2459.88	2545.23	3676.91	1.28674	1.8397e-07	9.5395e-07	6.8081	2.7672	up	0
POS_10537	2-(beta-D-Glucopyranosyloxy)benzyl-3-(hexopyranosyloxy)-6-hydroxy-2-methoxybenzoate	Organooxygen compounds	Carbohydrates and carbohydrate conjugates	33250.7	104564	49405.1	30852.7	64229.3	29644.1	8050.47	7250.31	7247.82	7356.08	8492.15	8065.55	1.00951	0.0039036	0.0071576	6.714	2.7472	up	0
POS_8732	2-(Hydroxymethyl)-6-[5-[3-(hydroxymethyl)-5-(3-hydroxypropyl)-7-methoxy-2,3-dihydro-1-benzofuran-2-yl]-2-methoxyphenoxy]oxane-3,4,5-triol	Flavonoids	0	3115.68	579.174	2009.18	1188.68	1424.93	413.077	3669.75	3637.12	4194.98	5313.32	2854.89	4767.47	1.11252	0.00070576	0.0014892	0.35727	-1.4849	down	0
POS_5686	2-[(2Z)-5-(Hexopyranosyloxy)-2-penten-1-yl]-3-oxo-, (1R,2R)-cyclopentaneacetic acid	Fatty Acyls	Fatty acyl glycosides	37833.8	26311.3	38059.9	30728.5	24919.8	30962.4	10793.7	7863.04	10501.6	8833.58	9382.37	9624.64	1.25892	2.5125e-06	9.222e-06	3.3126	1.728	up	0
POS_9072	2-[4-[4-[Hydroxy-(4-hydroxy-3-methoxyphenyl)methyl]-3-(hydroxymethyl)oxolan-2-yl]-2-methoxyphenoxy]-6-(hydroxymethyl)oxane-3,4,5-triol	Lignans, neolignans and related compounds	0	3066.04	3517.03	2297.42	3332.41	2653.33	2588.31	14468.9	11714.7	10460.5	12946.9	11851.1	11985	1.30434	1.9171e-08	1.3809e-07	0.23771	-2.0727	down	0
POS_9360	2-Methoxy-4-[tetrahydro-3a,6a-dihydroxy-4-(4-hydroxy-3-methoxyphenyl)-1H,3H-furo[3,4-c]furan-1-yl]phenyl-beta-D-glucopyranoside	Lignans, neolignans and related compounds	0	9987.69	10222.1	11872.6	11286.1	11019.8	11953.6	40597.1	30548.8	34983.1	34763.6	33972.5	32920.9	1.30871	1.1763e-08	9.3134e-08	0.31928	-1.6471	down	0
POS_4310	3-(4-Hydroxyphenyl)propanoic acid 3-(4-hydroxy-3-methoxyphenyl)propyl ester	Phenols	Methoxyphenols	240.027	200.564	211.321	126.286	194.816	526.726	2620.68	2602.47	2520.83	2308.12	2690.94	2639.38	1.31975	5.8074e-11	1.6859e-09	0.097497	-3.3585	down	0
POS_5684	3-O-Methylfunicone	Organooxygen compounds	Carbonyl compounds	3444.47	3466.02	2742.87	2799.37	2765.23	3263.97	14132.6	10651.8	11567.4	11194.2	10894.1	12095.4	1.30642	1.7417e-08	1.2876e-07	0.26202	-1.9322	down	0
POS_3053	3alpha,17beta-Dihydroxy-5alpha-androstane	Steroids and steroid derivatives	Androstane steroids	18832.5	33481.7	24568.9	31052.8	23034.2	32229.1	9923.37	8643.38	13781.9	10239.3	10335.2	13471.6	1.18714	8.6685e-05	0.00021969	2.458	1.2975	up	0
POS_7253	4-(4-Hydroxyphenyl)-2-butanyl 6-O-[(4xi)-alpha-L-threo-pentofuranosyl]-beta-D-glucopyranoside	Fatty Acyls	Fatty acyl glycosides	31763.9	22854.2	25927.8	31450.8	23280	29633.6	6710.42	5909.28	3685.34	2498.31	4616.72	3392.71	1.29295	1.2999e-07	7.3686e-07	6.1504	2.6207	up	0
POS_5633	4-[4-(beta-D-Glucopyranosyloxy)-2-hydroxy-2,6,6-trimethylcyclohexylidene]-3-buten-2-one	Prenol lipids	Terpene glycosides	29417	23804.3	31708.2	28300.1	27690.7	27931.8	66875.1	57506.8	63553.6	61746	64236.8	58269.6	1.31181	4.1871e-09	4.2565e-08	0.45367	-1.1403	down	0
POS_3235	4-[Formyl(6-methoxyquinolin-8-yl)amino]pentanoic acid	Organoheterocyclic compounds	0	10665.3	7761.08	10043.7	14050.2	9479.83	9626.19	26898.9	20124.6	31375.5	23289.5	23082.5	35503.6	1.20176	6.4963e-05	0.00017097	0.3845	-1.3789	down	0
POS_5034	4-Hydroxy-3-[(2E,6E)-4-hydroxy-3,7,11-trimethyldodeca-2,6,10-trienyl]benzoic acid	Prenol lipids	Sesquiterpenoids	2286.06	1722.68	2601	2481.18	2308.13	2255.18	4764.37	4689.38	5159.9	5861.87	5326.04	5760.56	1.29011	1.6963e-07	9.1297e-07	0.43261	-1.2088	down	0
POS_1194	4-Hydroxy-3-methoxycinnamaldehyde	Phenols	Methoxyphenols	3686.42	3776.91	4553.26	4850.57	4158.11	4171.05	13344.9	11039.2	10505.8	9966.82	10812.4	12131.1	1.29546	1.122e-07	6.5143e-07	0.37163	-1.4281	down	C02666
POS_6080	4-Hydroxy-6-methyl-3-methylidene-5-[5-[(2R,3R,4S,5S,6R)-3,4,5-trihydroxy-6-(hydroxymethyl)oxan-2-yl]oxypentan-2-yl]-3a,4,7,7a-tetrahydro-1-benzofuran-2-one	Prenol lipids	Terpene lactones	26142.7	25892.7	24434.8	26252.2	26016.5	26139.9	9712.68	8018.48	11115.7	9825.97	8321.39	10085.7	1.31998	4.3946e-11	1.3857e-09	2.7134	1.4401	up	0
POS_6732	5-Hydroxy-7-[4-hydroxy-2-methoxy-3-(3-methylbut-2-enyl)phenyl]-2,2-dimethyl-7,8-dihydropyrano[3,2-g]chromen-6-one	Isoflavonoids	Isoflavans	15930.2	12489.2	16717.7	13112.6	13680.2	13287.5	4455.23	4508.77	3698.27	4063.24	3861.44	5362.83	1.29107	1.0423e-07	6.1261e-07	3.2839	1.7154	up	0
POS_9695	5-Methoxy-3-methyl-4-[(2S,3R,4S,5S,6R)-3,4,5-trihydroxy-6-[[(2R,3R,4S,5S,6R)-3,4,5-trihydroxy-6-(hydroxymethyl)oxan-2-yl]oxymethyl]oxan-2-yl]oxy-3H-benzo[f][2]benzofuran-1-one	Organooxygen compounds	Carbohydrates and carbohydrate conjugates	2598.8	2820.78	3105.38	2871.75	2675.66	2351.94	30653.4	22097	28447.7	30034.3	27031.2	28401.9	1.31493	2.2216e-09	2.6604e-08	0.098547	-3.3431	down	0
POS_7497	6-[2-Hydroxy-3-methyl-3-[(2S,3R,4S,5S,6R)-3,4,5-trihydroxy-6-(hydroxymethyl)oxan-2-yl]oxybutyl]-5,7-dimethoxychromen-2-one	Fatty Acyls	Fatty acyl glycosides	5000.02	3944.88	4766.9	4561.04	4127.67	4825.64	10582.6	8437.08	9632.34	8894.11	9461.14	9803.61	1.29959	6.1215e-08	3.7569e-07	0.47924	-1.0612	down	0
POS_3853	8-O-Methylrabelomycin	Others	0	8491.93	7802.82	9012.75	8040.94	7014.23	8247.02	2507.16	2426.03	2259.56	2587.89	2947.04	2652.6	1.31003	3.5426e-09	3.7295e-08	3.1605	1.6602	up	0
POS_10854	9-Methoxy-7-[4-[3,4,5-trihydroxy-6-[[3,4,5-trihydroxy-6-(hydroxymethyl)oxan-2-yl]oxymethyl]oxan-2-yl]oxyphenyl]-[1,3]dioxolo[4,5-g]chromen-8-one	Isoflavonoids	Isoflavonoid O-glycosides	14525.1	10278.8	15275.3	13569.9	11840.7	12751.9	1924.1	1746.51	1678.4	1691.31	1775.58	1614.46	1.29962	3.1682e-08	2.1225e-07	7.5014	2.9072	up	0
POS_4983	9-Methoxycamptothecin	Alkaloids and derivatives	0	3262.09	5437.6	4883.69	4378.76	6924.65	5639.26	1640.18	359.358	1304.32	2966.21	1837.96	1601.39	1.15589	0.00020632	0.00048326	3.144	1.6526	up	0
POS_3914	Acebutolol	Organooxygen compounds	Carbonyl compounds	5621.33	3335.34	2083.27	4131.17	3661.74	2872.27	15998	12640.8	13096.9	13918.4	13454.4	16670.8	1.29147	1.5719e-07	8.6049e-07	0.25303	-1.9826	down	0
POS_5324	Alantrypinone	Organoheterocyclic compounds	0	78.8398	24.7194	149.383	125.23	32.6946	52.1977	4199.46	1923.25	2026.18	3675.99	3896.28	2249.56	1.21072	4.2523e-05	0.0001174	0.025768	-5.2783	down	0
POS_5329	Brucine	Strychnos alkaloids	0	24474.6	22265.3	21674.6	24743.7	21972.5	24370.9	5279.06	6906.59	7745.4	7599.61	10615.9	6817.27	1.30872	1.0114e-08	8.3529e-08	3.1025	1.6334	up	0
POS_13467	Chlorophyll b from Chlorella	Organoheterocyclic compounds	Chlorins	1109	1569.08	1885.42	784.859	303.614	500.758	37580.4	29646.2	39245.9	22890.3	29477.8	30234.8	1.28981	2.1883e-07	1.0919e-06	0.032541	-4.9416	down	0
POS_7125	Cirsimarin	Flavonoids	Flavonoid glycosides	10146.5	10185.7	11244.8	10317.5	9462.56	9264.94	2800.72	2059.53	2290.29	2284.43	2378.53	2111.5	1.31621	2.0599e-10	3.9467e-09	4.3535	2.1222	up	0
POS_5851	Cyanidin 3-arabinoside cation	Flavonoids	Flavonoid glycosides	15491.7	21551.7	30194.4	10622.1	17125.6	13034.7	614.446	431.442	254.041	399.601	538.724	341.441	1.17425	0.00011303	0.00027848	41.873	5.388	up	0
POS_7374	Cytidine 5'-diphosphocholine	Nucleosides, nucleotides, and analogues	Pyrimidine ribonucleotides	4042.3	3721.75	4523.98	4563.7	2734.76	4645.14	22693.8	19254.4	21791.4	22849.2	23818.4	25711.1	1.31385	2.0034e-09	2.5562e-08	0.17802	-2.4899	down	0
POS_9957	Diadinoxanthin A	Prenol lipids	Triterpenoids	17614.6	17515.5	16542.7	16465.3	20124.6	15930.3	3871.66	4352.96	4145.41	3726.85	3432.96	4300.49	1.31334	1.1711e-09	1.7529e-08	4.3723	2.1284	up	0
POS_3412	Dihydroxyoctadecadienoic acid	Fatty Acyls	Lineolic acids and derivatives	5989.12	7472.61	10752.3	8854.08	5597.85	5109.54	15838.9	14850.8	17062.5	17503	17250	16201.4	1.26173	2.9937e-06	1.0609e-05	0.44349	-1.173	down	0
POS_9764	Ergocristam	Ergoline and derivatives	Lysergic acids and derivatives	9517.89	7042.48	9951.82	5162.02	9017.34	7403.15	20509.4	20421	15938.6	12217.8	19765.5	20019	1.19474	7.1033e-05	0.00018492	0.44176	-1.1787	down	0
POS_5689	Isoapetalic acid	Organoheterocyclic compounds	1-benzopyrans	7616.99	6592.81	8669.36	7145.29	6806.31	7113.09	2628.22	3098.61	4081.15	3377.82	2434.07	3622.64	1.26895	1.0911e-06	4.5251e-06	2.2837	1.1914	up	0
POS_8896	Isogomphrenin I	Organooxygen compounds	Carbohydrates and carbohydrate conjugates	5087.38	3752.29	6224.91	3779.06	3887.68	3800.61	13592.6	8105.2	10646.3	9877.28	9123.09	10070.4	1.21021	5.3724e-05	0.0001458	0.43201	-1.2109	down	0
POS_1357	Isoscopoletin	Others	0	47891.1	43286.7	54632.6	46717.6	46568.8	46232.1	18741	15924.5	15926.3	16070.2	15619.7	16334.5	1.30843	3.1357e-09	3.4931e-08	2.8933	1.5327	up	0
POS_5029	Junipediol B 8-O-glucoside	Organooxygen compounds	Carbohydrates and carbohydrate conjugates	11451.9	8964.18	11216.5	11090.9	9730.14	11553.9	1583.82	1993.57	1962.23	2112.24	2242.88	2481.56	1.31124	3.4374e-09	3.6589e-08	5.1718	2.3707	up	0
POS_5079	Loratadine	Organoheterocyclic compounds	0	851.535	887.086	1697.99	512.957	805.398	316.897	5708.63	4669.35	4769.7	4797.25	4627.17	6826.79	1.27937	7.993e-07	3.4806e-06	0.16153	-2.6301	down	C06818
POS_7964	Lyalosidic acid	Prenol lipids	Terpene glycosides	2912.83	2349.25	4030.55	2742.66	2958.13	3573.26	1609.69	1137.07	1150.58	1168.1	986.698	971.325	1.21419	2.7119e-05	7.7091e-05	2.6435	1.4025	up	0
POS_9366	Lyoniside	Lignans, neolignans and related compounds	0	18698.5	14545.1	20461	16627.9	12837.7	16925.5	7894.35	6446.83	5941.64	6887.91	6936.76	5974.77	1.24563	6.1169e-06	1.973e-05	2.4973	1.3203	up	0
POS_4926	Marticin	Others	0	17468.6	15564.8	21820.3	15414	12738.3	15815.4	7408.59	5887.93	6135.83	6225.92	5843.39	6136.1	1.23377	1.0586e-05	3.2195e-05	2.6256	1.3926	up	0
POS_8494	Methyl 2-[(1R,5R,6R,13S,14S,16S)-14-acetyloxy-6-(furan-3-yl)-1,5,15,15-tetramethyl-8,17-dioxo-7-oxatetracyclo[11.3.1.02,11.05,10]heptadec-10-en-16-yl]acetate	Prenol lipids	Triterpenoids	12080.7	9681.39	13573.3	9790.35	8930.85	10042	1181.76	986.775	1348.54	871.561	1701.42	1148.15	1.28904	1.4027e-07	7.8583e-07	8.8556	3.1466	up	0
POS_265	N-Acetylimidazole	Organoheterocyclic compounds	Imidazoles	33895.1	42520.9	40935.9	35041.3	40684.7	33098	19157.2	17481.1	19749.3	22026.7	17585.9	16225.4	1.26365	1.4824e-06	5.9011e-06	2.0154	1.011	up	0
POS_6121	Nodakenin	Coumarins and derivatives	Furanocoumarins	654.892	590.799	791.506	239.798	639.166	366.085	21486.1	18503.2	19337.8	18248.8	20010.2	18432.7	1.3244	5.7651e-12	4.2485e-10	0.028291	-5.1435	down	0
POS_7158	Petunidin 3-galactoside	Flavonoids	Flavonoid glycosides	29199.1	15156.5	33485.3	21501.9	20370.6	23343.1	347.742	121.886	51.3039	152.968	305.192	112.978	1.24918	4.8666e-06	1.6245e-05	131	7.0334	up	0
POS_5685	Phenyl 6-O-[(2R,3R,4R)-3,4-dihydroxy-4-(hydroxymethyl)tetrahydro-2-furanyl]-beta-D-glucopyranoside	Organooxygen compounds	Carbohydrates and carbohydrate conjugates	32732.3	35981.3	41482.4	33708	37706.5	35880.3	16535.6	11451.6	14161.3	14570.8	13108.7	14277.1	1.2967	2.7505e-08	1.8688e-07	2.5859	1.3707	up	0
POS_5099	Prazosin	Organoheterocyclic compounds	Piperazines	10066.2	9895.91	9901.25	9479.65	9878.99	11004.2	4860.75	3677.84	4663.78	3817.95	3937.76	4097.53	1.31153	1.6977e-09	2.3235e-08	2.4037	1.2653	up	C07368
POS_591	Sabinene	Prenol lipids	Monoterpenoids	7824.75	9334.81	10485.1	9953.49	4633.76	9291.57	18667.3	18723.8	23691.2	18700.4	19418.6	20540	1.26282	2.3061e-06	8.5298e-06	0.43029	-1.2166	down	0
POS_8895	Satratoxin H	Prenol lipids	Sesquiterpenoids	41971.1	24749.3	58883.4	31710.6	25797.7	27133	1115.73	1986.77	1050.86	492.855	1113.16	579.033	1.18238	9.3276e-05	0.00023515	33.17	5.0518	up	0
POS_1181	Serotonin	Organoheterocyclic compounds	Tryptamines and derivatives	9797.47	10984	10825.3	16952.3	12574.1	14796.1	1148.72	1937.48	1257.42	827.659	975.214	1964.94	1.26755	1.6321e-06	6.3561e-06	9.3608	3.2266	up	C00780
POS_4488	Sweroside	Organooxygen compounds	Carbohydrates and carbohydrate conjugates	6705.05	5097.9	7611.21	5308.09	6115.45	5699.08	1160.62	836.382	746.524	1411.7	556.919	1330.16	1.28453	2.1308e-07	1.0688e-06	6.0468	2.5962	up	0
NEG_7426	(-)-Podophyllotoxin	Others	0	12262.4	9650.28	12249.9	11115.8	8950.22	10474.8	3641.18	3041.08	3068.47	2841.95	3178.08	3014.95	1.29285	9.2031e-08	5.4423e-07	3.4443	1.7842	up	0
NEG_4824	(2S,3S)-3,5,7-Trihydroxy-2-(4-hydroxyphenyl)-8-(3-methylbut-2-enyl)-2,3-dihydrochromen-4-one	Flavonoids	Flavans	6714.32	5651.81	6695.61	7485.75	6409.86	6899.13	27557.2	23283.9	27643.4	26532.7	26538.3	26348.1	1.32183	6.8525e-11	1.7929e-09	0.25241	-1.9862	down	0
NEG_3762	(9Z,15Z)-12,13-Dihydroxyoctadeca-9,15-dienoate	Fatty Acyls	Fatty acids and conjugates	6942.3	2842.79	9485.46	9060.15	6317.48	7129.19	16278.6	14500.4	17652.4	16217.9	16461.5	14323.9	1.24024	1.0167e-05	3.1119e-05	0.43776	-1.1918	down	0
NEG_12128	[[(2R,3S,4R,5R)-5-(6-Amino-7H-purin-9-ium-9-yl)-3,4-dihydroxyoxolan-2-yl]methoxy-oxidophosphoryl] [(2R,3S,4R,5R)-5-(3-carbamoylpyridin-1-ium-1-yl)-3,4-dihydroxyoxolan-2-yl]methyl phosphate	Nucleosides, nucleotides, and analogues	0	34394.4	13909.9	40107.5	24704.1	20097.6	23543.7	8730.18	6765.56	10069.7	10837.1	8977.84	12627.5	1.04992	0.0020692	0.0039501	2.7023	1.4342	up	0
NEG_14415	[3,4-Dihydroxy-6-[5-hydroxy-2-(4-hydroxyphenyl)-4-oxo-7-[3,4,5-trihydroxy-6-(hydroxymethyl)oxan-2-yl]oxychromen-3-yl]oxy-5-[(2S,3R,4R,5R,6S)-3,4,5-trihydroxy-6-methyloxan-2-yl]oxyoxan-2-yl]methyl acetate	Flavonoids	Flavonoid glycosides	21831.5	18544.5	26806.4	22410.8	20783	26298.1	4135.03	3843.47	3675.7	2086.5	4124.31	4360.25	1.2953	6.3698e-08	3.8379e-07	6.1495	2.6205	up	0
NEG_11728	[6-(Furan-3-yl)-6,8,12,16,21-pentahydroxy-7,15-dimethyl-9-oxo-3,17,19-trioxaheptacyclo[9.9.3.01,10.02,4.02,7.011,18.015,23]tricosan-14-yl] 2-methylbutanoate	Prenol lipids	Triterpenoids	268.819	272.704	63.4383	381.137	493.026	736.957	4442.19	3579.66	3791.41	2623.28	3879.76	3538.84	1.28924	1.89e-07	9.6823e-07	0.1014	-3.3019	down	0
NEG_3531	1-(2,4-Dihydroxyphenyl)-2-(3,5-dimethoxyphenyl)propan-1-one	Flavonoids	0	8298.66	7532.38	9756.97	8223.5	6379.85	7967.01	24755.5	19203.4	23246.6	23061.9	21869.3	23499.5	1.3076	1.6406e-08	1.2279e-07	0.35506	-1.4939	down	0
NEG_14359	1-O-[(3beta,5xi,9xi,18xi)-3-(beta-D-Glucopyranuronosyloxy)-28-oxoolean-12-en-28-yl]-beta-D-glucopyranose	Prenol lipids	Terpene glycosides	607.643	1376.32	999.626	1109.22	1237.32	453.728	1376.23	2504.28	2083.22	2103.52	2220.08	1804.78	1.10872	0.00065563	0.0013896	0.47832	-1.064	down	0
NEG_418	2-Hydroxy-4-methylvaleric acid	Fatty Acyls	Fatty acids and conjugates	40777	31170.7	42636.6	39818.3	30751.6	32333.3	16691.4	11910	14814.7	15199.3	14042	15112.4	1.25625	2.737e-06	9.9318e-06	2.4779	1.3091	up	0
NEG_10178	2-Oahsa	Fatty Acyls	Fatty acids and conjugates	8228.09	11011.8	6940.25	7041.23	10937.4	11923	9196.72	25945.5	24431.3	15183.2	25888.2	27080	1.01403	0.003407	0.0062768	0.43908	-1.1874	down	0
NEG_617	2,5-Dihydroxybenzoic acid	Benzenoids	Benzoic acids and derivatives	26203.9	17699.7	25133.6	22529.5	13481.2	17214.7	7103.35	6927.46	4315.17	3017.35	6602.03	7942.66	1.19629	6.296e-05	0.00016754	3.4049	1.7676	up	C00628
NEG_15587	3-[(2S,3R,4S,5S,6R)-4,5-Dihydroxy-3-[(2S,3R,4R,5R,6S)-3,4,5-trihydroxy-6-methyloxan-2-yl]oxy-6-[[(2S,3R,4R,5R,6S)-3,4,5-trihydroxy-6-methyloxan-2-yl]oxymethyl]oxan-2-yl]oxy-5-hydroxy-2-(4-hydroxyphenyl)-6-methoxy-7-[(2S,3R,4R,5R,6S)-3,4,5-trihydroxy-6-methyloxan-2-yl]oxychromen-4-one	Flavonoids	Flavonoid glycosides	36958.1	28320	41388.2	33886.3	30806.4	33634.7	7258.35	5302.47	7158.69	6602.01	6725.98	5722.25	1.29636	4.7078e-08	3.0269e-07	5.2875	2.4026	up	0
NEG_4571	3-[2-Hydroxy-3-[(2S,3R,4S,5S,6R)-3,4,5-trihydroxy-6-(hydroxymethyl)oxan-2-yl]oxyphenyl]propanoic acid	Organooxygen compounds	Carbohydrates and carbohydrate conjugates	12427	12112.6	11702.2	12417.8	10120.6	13658.9	31370.2	20838.4	28721.3	28479.4	26641.4	28072.3	1.27188	1.5284e-06	6.026e-06	0.44137	-1.1799	down	0
NEG_4766	4-Caffeoylquinic acid;4-O-Caffeoylquinic acid	Organooxygen compounds	Alcohols and polyols	26158.8	30015.8	21285.6	49450.2	36201.3	43024.7	7283.84	11707.3	12981.2	11863.4	13072.3	11704.3	1.13897	0.00040916	0.00089903	3.0044	1.5871	up	0
NEG_341	4-Hydroxybenzaldehyde	Organooxygen compounds	Carbonyl compounds	45572.4	32097.8	54515.8	42351	36461.7	41702.4	14418.7	13321.9	15904.7	15240.7	13207.8	16428.7	1.24328	6.5386e-06	2.102e-05	2.8547	1.5133	up	C00633
NEG_1060	4-Methoxycinnamic acid	Cinnamic acids and derivatives	Cinnamic acids	12124.7	10781.8	13045.6	11529.6	11234.5	11443.5	3357.67	2340.97	2693.65	2914.96	3301.02	3710.13	1.3135	6.4901e-10	1.0362e-08	3.83	1.9373	up	0
NEG_11127	5-Hydroxy-2-(3-hydroxy-4-methoxyphenyl)-7-[(2S,3R,4S,5S,6R)-3,4,5-trihydroxy-6-[[(2R,3R,4R,5R,6S)-3,4,5-trihydroxy-6-methyloxan-2-yl]oxymethyl]oxan-2-yl]oxy-2,3-dihydrochromen-4-one	Flavonoids	Flavonoid glycosides	31685.5	38969.7	40900.2	25222	20737.2	31321.2	1712.4	868.444	902.788	437.05	268.437	301.015	1.2612	2.0995e-06	7.9498e-06	42.056	5.3942	up	0
NEG_5592	Alfuzosin	Organoheterocyclic compounds	Benzodiazines	7917.06	7609.46	7223.03	7213.78	5259.07	6640.14	2874.92	2429.09	2298.49	2004.23	2148.04	2716.56	1.27759	5.7691e-07	2.5826e-06	2.8928	1.5325	up	0
NEG_2491	alpha-D-Mannose 1-phosphate	Organooxygen compounds	Carbohydrates and carbohydrate conjugates	35709.1	35098.8	37568.7	43727.7	41536.4	45961	15128.2	18394.5	23733.3	14351.7	14048.1	15857.8	1.26449	2.0439e-06	7.7702e-06	2.3603	1.239	up	C00636
NEG_3563	Arachidonic acid	Fatty Acyls	Fatty acids and conjugates	2464.85	3277	2109.97	2475.46	3723.22	2135.07	4589.71	10038.2	8570.24	5226.65	7992.2	5905.74	1.09878	0.00075131	0.0015715	0.38243	-1.3867	down	C00219
NEG_4403	Bavachalcone	Others	0	21551.3	13413.3	21752.6	18971.6	14262.3	18179.6	4231.63	3428.16	4077.05	3783	4003.56	4647.51	1.26113	2.2722e-06	8.4369e-06	4.4736	2.1614	up	0
NEG_4758	Chlorogenic acid	Organooxygen compounds	Alcohols and polyols	31176.6	28990	26471.8	27475.2	22568	28008.9	9517.27	7821.09	7307.78	8806.23	8032.06	8474.59	1.30305	2.2321e-08	1.5495e-07	3.2965	1.7209	up	C00852
NEG_1059	Coniferyl aldehyde	Phenols	Methoxyphenols	526.146	1815.37	1135.04	1237.54	1632.76	915.97	10824.7	8703.61	9095.48	9013.6	8190.48	8842.55	1.31316	3.3767e-09	3.6589e-08	0.13285	-2.9122	down	0
NEG_6616	Cosmosiin	Flavonoids	Flavonoid glycosides	34450.4	34092.5	30186.3	37305	32128	36794.2	9088.38	8334.88	7953.03	8454.97	8925.19	8288.98	1.31722	5.7612e-10	9.4188e-09	4.0152	2.0055	up	C04608
NEG_15390	Cy 3-coumSamb-5-Glc	Flavonoids	Flavonoid glycosides	1147.71	1381.15	863.722	1031.17	1155.82	866.494	1880.1	2190.57	2858.28	1934.39	2742.64	1639.53	1.13306	0.00038595	0.00085389	0.48666	-1.039	down	0
NEG_7055	Cynaroside	Others	0	57608.7	58790.2	29630.6	36926.9	58248.2	35080.7	9944.79	13322.4	6646.29	4554.53	9680.82	3890.03	1.20185	5.7502e-05	0.00015474	5.7513	2.5239	up	0
NEG_2493	Demethylbellidifolin	Organoheterocyclic compounds	1-benzopyrans	44180.3	28864.7	37404.6	34941.5	78212.3	45205.6	8322.26	4716.66	6192.94	2982.78	5181.22	2219.95	1.153	0.00024363	0.00056241	9.0765	3.1821	up	0
NEG_11056	Diosmetin-7-O-rutinoside	Flavonoids	Flavonoid glycosides	40325.9	29906.7	38567.4	30980.1	29061.2	29958.2	13976.3	10524.4	11841.7	12489.2	12520.6	12770.3	1.26451	1.5838e-06	6.2185e-06	2.682	1.4233	up	C10039
NEG_1924	Dodecanedioic acid	Fatty Acyls	Fatty acids and conjugates	29054.9	24857.8	32316.8	28985.5	25198.7	26747.8	62886.9	53750.3	56269.6	60086.8	57911.5	59590.2	1.31025	7.5636e-09	6.6476e-08	0.47693	-1.0682	down	C02678
NEG_2648	Estrona	Steroids and steroid derivatives	Estrane steroids	3277.68	2975.37	2776.68	3007.54	3176.17	3638.74	5728.55	7857.42	7121.87	5731.85	7338.6	7077.35	1.25679	2.1788e-06	8.1534e-06	0.46143	-1.1158	down	0
NEG_6912	FA 30:5	Fatty Acyls	Fatty acids and conjugates	20863	20213.7	21890.7	20353.1	16503.2	16929.9	7290	12846.6	10989.9	8791.34	7717.64	10500.2	1.23272	1.4811e-05	4.3794e-05	2.0083	1.006	up	0
NEG_2639	Galangin	Flavonoids	Flavones	3984.31	4285.84	4624.49	4050.63	4392.51	3706.64	1464.15	2597.44	1644.39	1587.1	2306.38	1696.97	1.26859	1.5987e-06	6.2512e-06	2.217	1.1486	up	C10044
NEG_4264	Gallic acid hexoside	Tannins	0	6589.26	1800.04	5081.38	6978.37	4873.29	2251.86	258.211	1021.92	609.781	681.57	667.961	827.967	1.08059	0.0012989	0.0025763	6.7793	2.7611	up	0
NEG_2637	Genistein	Isoflavonoids	Isoflav-2-enes	18254.7	16628.4	18901	18559	16227.6	17441.5	4522.18	3791.24	4013.09	3915.22	3960.2	3982.35	1.32028	3.915e-11	1.3395e-09	4.3835	2.1321	up	C06563
NEG_13970	Ginsenoside F3	Others	0	18502.7	12573.9	12075.7	14864.4	9031.74	12566.1	4453.37	7046.33	6019.1	4018.91	6012.26	7643.48	1.14159	0.00038867	0.00085596	2.2622	1.1777	up	0
NEG_15045	Ginsenoside-Rg1	Others	0	311.306	128.61	0	234.606	134.955	314.277	729.203	939.729	735.666	601.584	552.33	524.111	1.17629	9.9567e-05	0.00024905	0.28155	-1.8285	down	0
NEG_3036	Glycitein	Isoflavonoids	Isoflav-2-enes	8577.71	6725.73	10582.8	8024.28	6482.55	7830.69	21708.8	15779.9	19374.2	19706.3	19169	20171.6	1.28417	5.2863e-07	2.3776e-06	0.41605	-1.2652	down	C14536
NEG_5749	Hexose + C10H19O2	Organooxygen compounds	Carbohydrates and carbohydrate conjugates	4202.45	3452.06	6886.49	7894.18	5937.44	3697.75	11802.2	9584.25	13995.2	21525.9	12377.6	13734.3	1.10144	0.00091758	0.0018703	0.3863	-1.3722	down	0
NEG_1257	Hydron;2-hydroxypropane-1,2,3-tricarboxylate	Carboxylic acids and derivatives	Tricarboxylic acids and derivatives	5944.67	10636.7	9262.95	9015.78	10371.5	9088.03	2785.96	1861.68	1655.7	546.724	1368.96	1971.32	1.26151	1.8002e-06	6.9261e-06	5.3305	2.4143	up	0
NEG_337	Hydron;benzoate	Benzenoids	Benzoic acids and derivatives	13827.1	13690.9	12644.5	10496.2	9606.02	8519.49	33245.5	25691.4	28840.2	25355.7	23885	31391.4	1.26409	2.8407e-06	1.0154e-05	0.40843	-1.2918	down	0
NEG_8627	Hypericin	Benzenoids	Benzopyrenes	43768.3	38930.8	48444.7	50191.8	39660.1	45433.1	12845.1	11107.5	12681.7	12990.1	12524.7	12751	1.30504	1.0621e-08	8.6964e-08	3.5571	1.8307	up	0
NEG_2618	Inosine	Nucleosides, nucleotides, and analogues	0	11250.6	8998.06	12595.5	9425.37	8525.09	9976.26	27627.8	20315.2	22721.8	23665.3	22569.7	23996	1.28556	4.4474e-07	2.0609e-06	0.43132	-1.2132	down	0
NEG_8963	Isochlorogenic acid A	Organooxygen compounds	Alcohols and polyols	35600.4	24135.5	31698	27219	20157.7	40278.9	2748.57	4031.39	2408.35	974.452	2720.49	4073.76	1.25204	5.2669e-06	1.7399e-05	10.561	3.4007	up	0
NEG_6328	Isorhapontin	Stilbenes	Stilbene glycosides	15232.1	11210.1	16020.8	13737.2	10929.5	13310.6	4825.92	3485.18	4047.24	4092.95	3897.75	4342.37	1.27291	7.8949e-07	3.4536e-06	3.2578	1.7039	up	C10266
NEG_6266	Kaempferol-3-O-arabinoside	Others	0	4805.4	10749.8	25819	7640.24	14576.9	18108.6	415.496	293.823	297.759	224.451	530.115	348.766	1.06026	0.0016775	0.0032864	38.713	5.2747	up	0
NEG_6269	Liquiritin	Others	0	20843.3	15942.7	20685	20372.7	15126.6	17798.8	5670.16	4510.21	4762.09	4348.05	5609.93	5393.76	1.28783	1.8095e-07	9.5395e-07	3.6564	1.8704	up	0
NEG_4880	Matairesinol	Others	0	3736.76	2895.95	4194.19	3060.68	2902.64	3683.92	18886	11895.7	16298.3	17917.4	16205.6	17024	1.29416	1.5631e-07	8.6049e-07	0.20844	-2.2623	down	0
NEG_10281	Mulberroside A	Others	0	8257.7	7126.46	7814.15	8299.92	7087.51	8693.14	39157.5	30404.7	30849.3	33886.2	33905.6	37215.7	1.31152	4.882e-09	4.7242e-08	0.23016	-2.1193	down	0
NEG_7981	Myricetin-3-O-galactoside	Flavonoids	Flavonoid glycosides	36890	24892.2	48864.5	34143.1	28267.6	31708.9	381.844	310.205	251.482	651.412	565.877	134.9	1.26279	1.7872e-06	6.9261e-06	89.195	6.4789	up	0
NEG_3966	Neobavaisoflavone	Isoflavonoids	Isoflav-2-enes	6605.92	7862.19	6008.26	8095.24	7878.86	8489.85	18834.6	22477.6	21851.6	20636.1	23589.4	22678.1	1.30493	6.7985e-09	6.1443e-08	0.34552	-1.5332	down	0
NEG_12127	Nicotinamide-Adenine-Dinucleotide	Nucleosides, nucleotides, and analogues	0	17728.4	11115.2	23417.3	14565.7	11838.8	12543.3	8715.24	5401.98	7511.19	8080.88	7295.68	6197.47	1.04064	0.0023037	0.0043444	2.1112	1.0781	up	C00003
NEG_2636	Nordazepam	Organoheterocyclic compounds	1,4-benzodiazepines	8409.23	8264.83	8077.82	7938.58	8910.03	8272.14	214.686	110.544	79.1521	142.725	78.938	220.603	1.32611	5.1859e-14	2.1165e-11	58.906	5.8803	up	C07486
NEG_2950	Octyl gallate	Others	0	16373.7	13710.2	16512.3	15248.2	13630.3	14541.1	38998.7	33363	33657.3	37004.2	34045.4	34844.1	1.31312	2.8476e-09	3.2476e-08	0.42478	-1.2352	down	0
NEG_559	p-Coumaraldehyde	Cinnamic acids and derivatives	0	7189.9	5745.7	7517.37	6192.18	5967.57	5824.07	16550.2	10920.9	13337.8	13652.8	12935.9	13231.4	1.25659	5.1554e-06	1.709e-05	0.47671	-1.0688	down	0
NEG_575	p-Coumaryl alcohol	Cinnamic acids and derivatives	0	2276.96	2085.91	1790.14	2623.42	2185.39	2561.61	6431.26	4954.17	6184.73	6046.18	6307.21	6010.64	1.30113	3.7694e-08	2.4565e-07	0.37634	-1.4099	down	0
NEG_12450	Peonidin 3-(6''-acetyl)glucoside	Lignans, neolignans and related compounds	0	9433.92	15174.8	4527.03	4549.91	16273.4	4448.44	27188.6	29134.8	22576.2	25212.1	23780.9	23310.7	1.19415	6.716e-05	0.00017627	0.35983	-1.4746	down	0
NEG_14023	PG 36:3	Others	0	8803.88	11366.7	12399.9	9178.84	9276.93	6205.48	3590.32	6490.77	4684.38	2026.14	4917.44	4635.08	1.10748	0.00071874	0.0015133	2.1725	1.1193	up	0
NEG_9093	Pinoresinol 4-O-glucoside	Others	0	58179.7	57732.1	50050.9	55771.6	55942.4	46338.1	10390.6	22689.9	9584.26	5586.78	25400	25957.9	1.25488	4.3463e-06	1.4713e-05	3.2529	1.7017	up	0
NEG_3787	Porphyrillic acid	Organoheterocyclic compounds	Dibenzofurans	15140.4	8782.03	18816.3	10789.9	6820.4	9551.7	4881.19	2232.53	3017.25	3975.46	3099.85	3219.63	1.07524	0.0012932	0.0025703	3.4222	1.7749	up	0
NEG_10464	Procyanidin B1	Flavonoids	Biflavonoids and polyflavonoids	1112.55	1694.16	690.496	2004	1957.74	1207.29	4498.99	4639.31	4238.89	3247.2	4816.1	4766.67	1.25383	3.7509e-06	1.3114e-05	0.33068	-1.5965	down	C10221
NEG_8698	Protohypericin	Others	0	12155	10296.9	6761.9	4221.99	8204.57	9154.15	21938.4	11122.4	18559.2	17823.5	17719	19946.4	1.13009	0.00052986	0.0011381	0.47423	-1.0763	down	0
NEG_2940	Pseudobaptigenin	Isoflavonoids	Isoflav-2-enes	10324.1	8764.61	10087.2	9981.09	8319.73	9988.18	22478.8	19331.6	22030.7	20351.2	21007.9	20851.9	1.31383	2.218e-09	2.6604e-08	0.45588	-1.1333	down	C10522
NEG_13713	Quercetin 3-O-[2''-O-(6'''-O-p-coumaroyl)-b-D-glucopyranosyl]-a-L-rhamnopyranoside	Others	0	28681.7	28289.3	29548.4	25403.1	26278.6	24203.3	120.253	56.5269	63.6778	49.9338	88.0596	99.4228	1.32076	2.3528e-11	9.3915e-10	339.85	8.4087	up	0
NEG_11423	Quercetin 3,4'-diglucoside	Flavonoids	Flavonoid glycosides	34177.2	24049.1	29555.4	18654.3	30627.2	33213.9	9298.1	5755.74	8245.21	7212.84	8128.89	7850.94	1.24144	8.2088e-06	2.5784e-05	3.6625	1.8728	up	0
NEG_11809	Quercetin 5-Glc-Rha	Flavonoids	Flavonoid glycosides	37041.6	24228.9	32911.1	30217.1	6744.05	40932.1	1475.56	1617.52	938.631	648.891	1074.08	1437.52	1.15605	0.00025254	0.00058017	23.925	4.5805	up	C17563
NEG_1812	Sinapic acid	Cinnamic acids and derivatives	Hydroxycinnamic acids and derivatives	36438.4	25536.5	35068	30106.7	32200.2	33074.7	14494.7	13139.1	12292.8	13117.2	13116.5	11968.2	1.28205	3.6956e-07	1.7527e-06	2.4629	1.3004	up	C00482
NEG_4905	Skimmin	Coumarins and derivatives	Coumarin glycosides	3922.89	2851.27	4638.1	5271.44	3176.14	5336.27	16011	13664.8	14744.9	15338.8	15414.2	14840.1	1.31302	2.1511e-09	2.6604e-08	0.27991	-1.8369	down	0
NEG_7537	Spiraeoside	Flavonoids	Flavonoid glycosides	41817.6	38901.1	49879.8	42454.7	36148.8	33761.7	13640.3	11935.3	10688.7	12288.9	11511.4	12110.1	1.28245	2.6376e-07	1.2892e-06	3.3663	1.7512	up	0
NEG_12189	Syrosingopine	Alkaloids and derivatives	0	14322.7	12484.1	15938.8	13362.9	13074.4	13578.2	4894.78	4425.66	4514	5032.05	4372.52	4513.87	1.30681	5.7371e-09	5.4418e-08	2.9821	1.5763	up	0
NEG_6044	Tinnevellin glucoside	Others	0	9697.18	7068.17	10411.6	9127.37	6886.96	8113.6	3206.9	1974.89	2627.04	2690.84	2744.16	2909.54	1.2594	2.2408e-06	8.3528e-06	3.1761	1.6673	up	0
NEG_996	trans-Aconitic acid	Carboxylic acids and derivatives	Tricarboxylic acids and derivatives	9320.01	6948.18	10124.6	9761.37	7046.23	7641.04	2869.54	2836.98	2587.56	2807.66	2964.24	2899.87	1.26137	2.1746e-06	8.1534e-06	2.9967	1.5834	up	C02341
NEG_588	Vanillin	Phenols	Methoxyphenols	14668.2	13866.6	15863.5	13674.5	12569.8	14324.8	3871.45	4623.64	3998.71	4122.52	4294.3	3661.65	1.31434	1.0802e-09	1.6447e-08	3.4578	1.7899	up	C00755
NEG_1358	Vanillylmandelic acid	Phenols	Methoxyphenols	12185.2	15117.6	12646.2	13914.1	15198	14632.5	7328.42	6471.63	6900.9	7300.16	6455.79	6875.76	1.28935	1.4299e-07	7.964e-07	2.0249	1.0178	up	C05584

## Sheet: AS VS KD
ID	Name	Class	Subclass	AS-1	AS-2	AS-3	AS-4	AS-5	AS-6	KD-1	KD-2	KD-3	KD-4	KD-5	KD-6	VIP	P_value	FDR	Fold Change	log2(FC)	Type	KEGG
POS_1912	N-(2-Oxooxolan-3-yl)octanamide	Carboxylic acids and derivatives	Amino acids, peptides, and analogues	76278.4	66677.4	81635	70320.5	65523.5	65239.9	631731	567265	542073	645240	533423	646035	1.39139	2.6679e-09	8.4239e-08	0.1209	-3.0481	down	0
POS_5327	Syringin	Organooxygen compounds	Carbohydrates and carbohydrate conjugates	42669.9	38207.1	43094.7	39858.2	38148.7	37731.7	98220.1	86754.6	81211.8	100597	82982.6	96319.8	1.36974	2.3055e-07	1.699e-06	0.44602	-1.1648	down	0
POS_3124	Hydrocinchonine	Alkaloids and derivatives		2.96733e+06	2.4879e+06	3.19853e+06	2.799e+06	2.55097e+06	2.6581e+06	118411	92501	104246	96899.2	93586.1	108332	1.39348	3.8982e-09	1.067e-07	28.018	4.8083	up	0
POS_6346	1-Dodecanoyl-sn-glycero-3-phosphocholine	Glycerophospholipids	Glycerophosphocholines	74457.1	62850	79117.8	63029.6	61341.6	66070.7	15788.9	15573.6	15024.5	15499.5	15058.9	17791	1.3825	7.6034e-08	7.4327e-07	4.2947	2.1026	up	0
POS_3418	2,4-Dihydroxyheptadecyl acetate	Fatty Acyls	Fatty alcohols	50126.7	43143.1	69760.3	111115	69690.3	38551	174139	133534	134638	151399	132760	161862	1.25665	0.00019969	0.00058682	0.44618	-1.1643	down	0
POS_5412	[1,3-Dihydroxy-1-(7-methoxy-2-oxochromen-6-yl)-3-methylbutan-2-yl] (E)-2-methylbut-2-enoate	Coumarins and derivatives		2008.76	2801.07	3420.6	3575.54	1681.51	1365.68	59047.3	46868.3	44563.5	49599.4	39123.8	27350.4	1.35015	1.7227e-06	9.7082e-06	0.05965	-4.0673	down	0
POS_3037	Norcimifugin	Others		62036.7	48932.7	65408.1	57335.5	55349.3	58517.8	152205	146650	139619	154720	134656	160670	1.38243	2.4594e-08	3.4649e-07	0.39338	-1.346	down	0
POS_1333	3-n-Butylphathlide	Others		2419.5	2536.3	4022.02	3210.44	916.507	3280.16	10514.4	10948.6	8586.61	11820.2	6372.57	11543.7	1.28639	8.2881e-05	0.00026716	0.27712	-1.8514	down	0
POS_6356	Ginkgolide C	Others		462.074	386.908	585.461	1101.97	1028.57	1172.32	14759.9	13321.2	14350.9	13866.4	11918.4	14379.7	1.39757	3.3283e-10	2.0975e-08	0.058195	-4.103	down	0
POS_6223	Mundulone	Isoflavonoids	Isoflavans	4553.3	3789.63	5562.08	6200.61	4493.43	5316.96	37964.7	33301.4	30661.4	31365	36180.2	31884.9	1.38992	3.6861e-10	2.0975e-08	0.15258	-2.7124	down	0
POS_6964	Sucrose 6-benzoate	Organooxygen compounds	Carbohydrates and carbohydrate conjugates	4063.46	3801.38	5366.06	3782.48	3822.46	4858.42	12570.8	13161.5	13044.2	13436.4	13526.9	13541.9	1.39102	3.7221e-10	2.0975e-08	0.32097	-1.6395	down	0
POS_3240	2-Monomyristin	Glycerolipids	Monoradylglycerols	4.21232e+06	3.11108e+06	4.38376e+06	3.67717e+06	3.37129e+06	3.93752e+06	501175	431184	433305	462884	404688	490565	1.38219	1.0897e-07	9.321e-07	8.5084	3.0889	up	0
POS_8809	3-{7-[5-(1-hydroxynonadec-4-en-1-yl)oxolan-2-yl]heptyl}-5-methyl-5H-furan-2-one	Others		1.44173e+06	821447	1.34577e+06	977596	812608	957925	237777	200908	300855	47636.3	283577	77277.1	1.29743	8.5001e-05	0.00027144	5.8199	2.541	up	0
POS_6059	Taraxasterol	Prenol lipids	Triterpenoids	33741.4	72907.7	58072.6	60399.7	47891.6	62201.3	177006	263907	414930	132718	381268	141210	1.10903	0.0033141	0.0073493	0.2094	-2.2557	down	0
POS_8705	(2R,3E)-4-[(1S,6R)-1-Hydroxy-2,2,6-trimethyl-4-oxocyclohexyl]-3-buten-2-yl 6-O-beta-D-xylopyranosyl-beta-D-glucopyranoside	Fatty Acyls	Fatty acyl glycosides	133270	109063	134887	124714	115772	121325	1.21238e+06	1.12347e+06	1.02698e+06	1.21332e+06	1.03119e+06	1.29708e+06	1.39004	5.0666e-09	1.1375e-07	0.1082	-3.2083	down	0
POS_7328	(1R,2S,4R,5R)-5-Hydroxy-1,7,7-trimethylbicyclo[2.2.1]hept-2-yl 6-O-[(2R,3R,4R)-tetrahydro-3,4-dihydroxy-4-(hydroxymethyl)-2-furanyl]-beta-D-glucopyranoside	Prenol lipids	Terpene glycosides	11160.2	11869.5	24081.6	19887.8	11979.6	11530.6	588190	521872	501366	539790	548247	657400	1.38936	4.111e-09	1.094e-07	0.027242	-5.198	down	0
POS_2614	2-(6-Aminopurin-9-yl)-5-(hydroxymethyl)oxolane-3,4-diol	Nucleosides, nucleotides, and analogues		95987.8	63914.4	111457	80358.3	64378.4	74606.3	374405	264906	238122	381297	226748	393788	1.2769	0.00010661	0.00033595	0.27173	-1.8797	down	0
POS_5250	4-(1,3-Benzodioxol-5-ylmethyl)-3-[(3,4-dimethoxyphenyl)methyl]oxolan-2-one	Lignans, neolignans and related compound	Tetrahydrofuran lignans	15818.4	12320.2	17988.3	14561.6	11975.8	15086.8	172856	165554	299208	290419	141399	310361	1.29569	6.8317e-05	0.00022804	0.060588	-4.0448	down	0
POS_6910	5-[(1R,3S,5R,8S)-3-(beta-D-glucopyranosyloxy)-8-hydroxy-1,5-dimethyl-6-oxabicyclo[3.2.1]oct-8-yl]-3-methyl-, (2Z,4E)-2,4-pentadienoic acid	Prenol lipids	Sesquiterpenoids	64631	56108.9	68150.8	60994.5	54374.7	59428.7	221140	190454	187785	194484	181795	233278	1.37921	6.6773e-08	6.9531e-07	0.30682	-1.7045	down	0
POS_9002	Arctiin	Lignans, neolignans and related compound		10020.3	9729.98	10011.8	10620.2	9360.85	10820.4	69407.4	71219.9	66409.3	70267.4	65576.7	68881	1.40035	7.0292e-13	3.367e-10	0.14742	-2.762	down	0
POS_6354	Barbaloin	Benzenoids		8345.05	7554.53	8370.51	8097.4	7747.49	7954.3	267580	264683	262547	271160	247209	257925	1.40116	1.2359e-13	1.184e-10	0.03073	-5.0242	down	0
POS_8338	Chaetoglobosin C	Alkaloids and derivatives	Chaetoglobosins	7244.28	4960.32	7619.23	3932.82	2163.42	4716.16	86079.7	77367.6	75340.8	94032.1	77957.5	83436.3	1.38966	1.8044e-09	6.4022e-08	0.062553	-3.9988	down	0
POS_6325	Phenethyl 2-O-(beta-D-xylopyranosyl)-beta-D-glucopyranoside	Organooxygen compounds	Carbohydrates and carbohydrate conjugates	426075	382868	464476	394021	384751	393259	1.49246e+06	1.35709e+06	1.32666e+06	1.47097e+06	1.27117e+06	1.53086e+06	1.38988	4.5169e-09	1.1053e-07	0.29293	-1.7714	down	0
POS_5415	S-Adenosylmethionine	Nucleosides, nucleotides, and analogues	5'-deoxy-5'-thionucleosides	97786.6	98270	138112	89730.6	91634	83513	451180	378097	289751	444573	335593	482722	1.32788	1.122e-05	4.7546e-05	0.25856	-1.9514	down	0
POS_6207	Sayaendoside	Organooxygen compounds	Carbohydrates and carbohydrate conjugates	35273.8	30525.3	40451.3	30938.9	29555.5	33770.1	241993	207625	207514	246156	184156	243734	1.38316	3.8556e-08	4.6756e-07	0.15341	-2.7045	down	0
POS_6700	Vindoline	Others		14327.8	14640.6	14305	14278.4	13458.8	12450.3	77029	69996.5	66990.9	81821.7	65698.6	83028.4	1.38465	2.6848e-08	3.5839e-07	0.18923	-2.4017	down	0
POS_4718	(4-Hydroxy-3,5-dimethoxyphenyl)methyl-beta-D-glucopyranoside	Organooxygen compounds	Carbohydrates and carbohydrate conjugates	110082	86037.2	117566	112659	88073	110309	301027	262331	218014	332495	235600	329407	1.30661	2.9683e-05	0.00010731	0.37784	-1.4042	down	0
POS_10345	Asteriaceramide A	Others		85639.5	93058	77138.2	91507.3	96079.6	116039	61622.4	33922.1	36879.8	46119.1	63843.6	30788	1.27613	0.00012654	0.00039105	2.2038	1.14	up	0
POS_4260	5-(5-Methoxycarbonyl-5,8a-dimethyl-2-methylidene-3,4,4a,6,7,8-hexahydro-1H-naphthalen-1-yl)-3-methylpentanoic acid	Prenol lipids	Diterpenoids	67711.8	53910.1	67465.6	53106.9	53103.3	49686.6	225619	181183	179862	224053	190043	214027	1.3754	7.0234e-08	7.0825e-07	0.29064	-1.7827	down	0
POS_6854	4-[3-Methyl-5-(5,6,7-trihydroxy-1,2,4a,5-tetramethyl-3,4,6,7,8,8a-hexahydro-2H-naphthalen-1-yl)pentoxy]-4-oxobutanoic acid	Prenol lipids	Diterpenoids	45495.2	37811.1	51142.7	20757.8	38631.5	39863.1	88515.9	88502.2	98545.4	92729.6	102903	100018	1.34764	1.4888e-06	8.697e-06	0.40346	-1.3095	down	0
POS_7916	1-Heptadecanoyl-sn-glycero-3-phosphocholine	Glycerophospholipids	Glycerophosphocholines	80619.5	42051.3	66269	58007.5	53485.8	63849.3	88508.2	121886	137615	127276	120025	120189	1.33129	4.1764e-06	2.0838e-05	0.48417	-1.0464	down	C04230
POS_5455	6-formyl-5-hydroxy-10-(hydroxymethyl)-3-methylidene-2-oxo-2H,3H,3aH,4H,5H,8H,9H,11aH-cyclodeca[b]furan-4-yl 2-methylbutanoate	Others		17489.8	14715.2	15477	15602.9	16279.7	15247.8	53946	48133	46415.2	52822.8	48207.2	52943.9	1.39255	7.7397e-10	3.5603e-08	0.31792	-1.6533	down	0
POS_8697	Satratoxin F	Prenol lipids	Sesquiterpenoids	3444.43	3205.45	4289.03	4511.92	3649.15	3206.47	32239.7	29902.7	27057.3	29529.2	28526.9	32421.7	1.39587	1.9587e-10	1.3625e-08	0.12608	-2.9876	down	0
POS_894	6-methoxyquinoline	Others		119054	51674	134003	115807	105059	112747	269669	230405	227213	266124	217681	275937	1.31349	1.667e-05	6.6446e-05	0.43697	-1.1944	down	0
POS_6510	Luteolin-4'-o-glucoside	Flavonoids	Flavonoid glycosides	161593	66973.1	236536	159018	134931	139482	51787.7	36880.3	21214.7	53664.9	52625.7	42235.7	1.16889	0.0020036	0.0046816	3.6239	1.8575	up	0
POS_3983	(3R,5R)-1,3,5-trihydroxy-4-[(E)-3-(4-hydroxyphenyl)acryloyl]oxy-cyclohexanecarboxylic acid	Organooxygen compounds	Alcohols and polyols	4005.18	3429.66	2738.45	2348.58	695.445	3089.49	84009.7	70642.4	64199	86424	62929.9	79541.8	1.38231	3.6738e-08	4.5121e-07	0.037359	-4.7424	down	0
POS_6265	(5-Benzoyloxy-4,6-dihydroxy-3-methoxycyclohexen-1-yl)methyl benzoate	Benzenoids	Benzoic acids and derivatives	14714.4	15545.8	23044.9	19845	17618.7	20533.7	75936.9	63597.4	58981.3	78425.6	61152.6	84410.8	1.35098	2.2729e-06	1.2164e-05	0.26763	-1.9017	down	0
POS_7113	[1-[2-Aminoethoxy(hydroxy)phosphoryl]oxy-3-hydroxypropan-2-yl] octadeca-6,9,12-trienoate	Glycerophospholipids	Glycerophosphoethanolamines	48612.5	40948.4	54739.8	45149.4	41814.8	44527.4	115526	102208	105276	118404	101342	117013	1.3749	8.1498e-08	7.8298e-07	0.42229	-1.2437	down	0
POS_7078	[5-Ethenyl-3-hydroxy-4-(3-hydroxyprop-1-en-2-yl)-2-(3-methoxy-3-oxoprop-1-en-2-yl)-5-methylcyclohexyl] 4-acetyloxy-3-hydroxy-2-methylidenebutanoate	Prenol lipids	Sesquiterpenoids	24386.1	21319.1	30014.6	22302.4	21153.5	21434.8	90758.9	87448.5	84496	95453.7	75975.9	101861	1.37806	1.0168e-07	8.9366e-07	0.26318	-1.9259	down	0
POS_641	2-Hydroxyquinoline	Organoheterocyclic compounds	Quinolones and derivatives	33474.9	32294.2	40983.3	30791.4	30522.6	31802.1	243742	154706	138351	276894	155349	316144	1.22415	0.00050869	0.0013357	0.15993	-2.6445	down	0
POS_1576	2,3-Dihydro-3-hydroxy-2-oxo-1H-indole-3-acetic acid	Organoheterocyclic compounds	Indolyl carboxylic acids and derivatives	28122.9	18310.2	33713.8	22637.6	19365.1	20225.8	230130	114139	100035	254695	108582	270999	1.14841	0.0022342	0.0051699	0.13984	-2.8382	down	0
POS_4537	5,7,3'-Trihydroxy-6,4',5'-trimethoxyflavone	Others		4993.83	4562.47	5867.5	4425.66	4044.48	3967.16	171522	141951	142534	173280	140930	187247	1.38372	3.0159e-08	3.8522e-07	0.029541	-5.0811	down	0
POS_2704	alpha-Naphthoflavone	Flavonoids	Flavones	239148	205941	227835	231987	212938	223839	4279.95	97564	107542	5368.95	10725.8	3727.87	1.31297	1.965e-05	7.5603e-05	4.9708	2.3135	up	0
POS_2216	D-Pantothenic acid	Carboxylic acids and derivatives	Amino acids, peptides, and analogues	550137	330559	579161	490072	349095	414204	1.16397e+06	947659	885958	1.15708e+06	733309	1.15413e+06	1.25375	0.00020069	0.00058795	0.4635	-1.1094	down	0
POS_8210	Haploperoside C	Coumarins and derivatives	Coumarin glycosides	16513.5	9732.15	15580.2	13233.4	8437.81	11297.6	138960	108104	104108	149400	106486	156792	1.35134	2.0593e-06	1.1273e-05	0.099744	-3.3256	down	0
POS_6012	Lupenone	Others		63340	75179.9	91296.4	90237.5	74322.6	16396.1	213546	311318	352121	152225	362926	117470	1.10615	0.0033921	0.0075049	0.26412	-1.9208	down	0
POS_1458	Methylecgonine	Alkaloids and derivatives		18467.7	20366.4	21946.1	18506.7	17695.7	18646.2	92430.5	77795	60408	99515	76250.5	99707.4	1.33503	6.6189e-06	3.0745e-05	0.23293	-2.102	down	0
POS_6965	Phenethyl sophoroside	Organooxygen compounds	Carbohydrates and carbohydrate conjugates	19590.9	15687.9	18289.3	17673.5	16256.2	17674.3	114309	104977	96927.6	106170	96364.1	107187	1.39792	2.7681e-11	5.3036e-09	0.1713	-2.5454	down	0
POS_9809	Toosendanin	Others		34948.1	32920.8	37691.3	35711.8	35893.8	30185.5	186557	168679	157057	190137	167521	204373	1.38454	2.0634e-08	3.1377e-07	0.19464	-2.3611	down	0
POS_3238	Methyltestosterone	Steroids and steroid derivatives	Androstane steroids	213575	192704	187402	183777	207001	182595	1.39677e+06	732433	888128	893440	719160	1.04777e+06	1.36572	7.4426e-07	4.7219e-06	0.22718	-2.1381	down	C07198
POS_6623	4'-O-b-D-Glucosyl-5-O-methylvisamminol	Organoheterocyclic compounds	1-benzopyrans	6725.38	2514.56	7403.79	6126.71	4944.61	6008.28	61835.8	53864.9	53010.8	59875.5	55098.1	66510.9	1.3882	4.3495e-09	1.0965e-07	0.097457	-3.3591	down	0
POS_5055	6-{5a,11-dimethyl-1H,2H,3H,4H,5H,6H,7H,8H,9H,9aH-cyclopenta[a]phenanthren-1-yl}-2,3-dimethylheptane	Others		112497	130217	129173	156351	130087	99118.6	105800	65929.7	77719.3	45198.6	85135.2	32089.4	1.21723	0.00056591	0.0014574	2.0623	1.0442	up	0
POS_974	1-Deoxynojirimycin	Others		10894.8	11827.3	10543.5	10203.8	10068.5	17898.8	109350	108819	186786	202982	198555	261266	1.31498	1.9134e-05	7.4513e-05	0.062114	-4.0089	down	0
POS_3096	Methyl linoleate	Others		26696.2	23989	52495.5	27588.5	20695	20838.9	1.74086e+06	1.48032e+06	1.32576e+06	1.53979e+06	1.33102e+06	1.52742e+06	1.39722	1.0526e-10	9.1675e-09	0.019931	-5.6489	down	0
POS_5732	1-[4-[2-(7-Methoxy-1,3-benzodioxol-5-yl)ethyl]phenoxy]-3-methylbutane-2,3-diol	Stilbenes		14868.9	14628.8	11938.9	12031.3	15247.2	13231.2	74113.5	83703.2	56071.1	75714.8	72497.4	84204.4	1.3675	3.8252e-07	2.6749e-06	0.18348	-2.4463	down	0
POS_4092	2-[(2'R,8R,8aS)-2',4,4,7,8a-Pentamethylspiro[2,3,4a,5-tetrahydro-1H-naphthalene-8,5'-oxolane]-2'-yl]acetic acid	Prenol lipids	Diterpenoids	7376.79	7981.27	5704.86	4154.74	7736.67	4630.37	82392	73663.7	73390.2	85681.1	75212.8	91269.6	1.39059	4.2457e-09	1.0965e-07	0.078455	-3.672	down	0
POS_4681	3-[3-hydroxy-2-[(2S,3R,4S,5S,6R)-3,4,5-trihydroxy-6-(hydroxymethyl)oxan-2-yl]oxyphenyl]propanoic acid	Organooxygen compounds	Carbohydrates and carbohydrate conjugates	52099.5	48361.1	56270.7	54480.5	48308.5	51038.9	166310	154000	150750	165221	157670	168823	1.39424	1.4946e-10	1.1932e-08	0.32494	-1.6218	down	0
POS_6664	5‐(1‐benzofuran‐2‐yl)‐N,N‐dimethyl‐2‐[4‐(piperazin‐1‐yl)phenyl]‐1,3‐thiazole‐4‐carboxamide	Organoheterocyclic compounds	Piperazines	730.183	558.13	1392.72	520.652	1167.6	562.038	40271.3	41774.1	34707.7	43965	42989.2	46032.6	1.3895	2.1777e-09	7.1938e-08	0.019618	-5.6717	down	0
POS_4308	Bartsioside	Prenol lipids	Terpene glycosides	25192.8	19856.6	25615.1	27270.3	22908.8	24857.2	66780.5	68730.3	61927.5	64454.1	64472	65311.5	1.39027	7.2034e-10	3.5603e-08	0.37371	-1.42	down	0
POS_6462	HT-2 Toxin	Prenol lipids	Sesquiterpenoids	19740.5	5983.99	23449.9	11794.2	7704.76	8728.24	83831.1	64706.9	50990.8	73695.8	49920.6	79877.7	1.31467	1.9613e-05	7.5603e-05	0.20208	-2.307	down	0
POS_6081	Majdine	Organoheterocyclic compounds		15854.2	15804.7	20877.9	15883.3	16034.5	15519.5	6969.17	7813.52	8212.87	5604.31	7470.85	6403.86	1.33757	6.6595e-06	3.0745e-05	2.3465	1.2305	up	0
POS_5109	Methyl 2-hydroxy-6-(4-hydroxy-2-methoxy-6-methoxycarbonylphenoxy)-4-methylbenzoate	Benzenoids	Diphenylethers	18755.3	11283.9	18229	14872.6	13475.3	15733.9	71048.5	41120	46382.2	69684	39492.9	64468.1	1.27108	0.00012607	0.00039105	0.29469	-1.7627	down	0
POS_10392	(1beta,3beta,9xi,11alpha,14xi)-1,3,11-Trihydroxyfurosta-5,20(22),25-trien-27-yl beta-D-glucopyranoside	Steroids and steroid derivatives	Steroidal glycosides	257800	204599	283531	241009	218523	223664	4051.97	3567	4117.67	3932.12	3770.49	3484.23	1.38815	2.3236e-08	3.3728e-07	63.108	5.9797	up	0
POS_1222	12-Hydroxydodecanoic acid	Hydroxy acids and derivatives	Medium-chain hydroxy acids and derivatives	49661.4	45296.7	57290	50569.8	46546.8	44009.3	149143	150998	142316	156496	136222	142655	1.39151	1.306e-09	4.8123e-08	0.33551	-1.5756	down	C08317
POS_4238	2',5,6-Trimethoxyflavone	Flavonoids	O-methylated flavonoids	389797	423704	625651	450925	435165	360849	211258	211553	140968	195754	179618	136507	1.26702	0.00015271	0.00046151	2.5896	1.3727	up	0
POS_3298	5,7-Dimethoxyflavanone	Flavonoids	O-methylated flavonoids	59372.2	51969.4	126706	58503.3	60603.4	42376.2	310553	288720	220938	240617	199442	297381	1.32344	1.5863e-05	6.3851e-05	0.26697	-1.9052	down	0
POS_2511	8-Hydroxy-9,10-epoxystearic acid	Fatty Acyls	Lineolic acids and derivatives	258917	165816	257241	245188	196873	214151	71311.2	100442	107821	45805	71119.7	31919.6	1.30134	6.0233e-05	0.00020318	3.1227	1.6428	up	0
POS_4087	beta-Lactose	Organooxygen compounds	Carbohydrates and carbohydrate conjugates	21885.8	28025.4	84785.5	26937.4	26331.7	28250.7	75280	141427	110132	47391.1	81036.3	106867	1.05969	0.0074788	0.015886	0.37009	-1.434	down	C01970
POS_6961	Monotropitoside	Organooxygen compounds	Carbohydrates and carbohydrate conjugates	24715.6	20630.8	26968.6	25558.7	21613.2	23521.4	69763.4	67605.8	59516.9	73905.7	64063.4	75743.7	1.37406	1.0564e-07	9.1174e-07	0.34965	-1.516	down	0
POS_821	Nerol	Prenol lipids	Monoterpenoids	106296	112409	130257	112000	95667.2	103693	372771	418693	401533	435173	351956	399108	1.3904	5.1059e-09	1.1375e-07	0.27425	-1.8664	down	C09871
POS_4512	Palatinose	Organooxygen compounds	Carbohydrates and carbohydrate conjugates	975849	848278	1.96514e+06	898427	984960	774258	4.81029e+06	4.40388e+06	3.48403e+06	3.92203e+06	3.22751e+06	4.69844e+06	1.33384	8.3803e-06	3.6492e-05	0.27222	-1.8772	down	0
POS_5756	Stigmasterol	Steroids and steroid derivatives	Stigmastanes and derivatives	87056.6	85819.4	90692.2	86610.3	77990.7	96483	639801	1.09511e+06	1.22968e+06	559788	1.23466e+06	455717	1.21841	0.00041854	0.0011097	0.095566	-3.3874	down	0
POS_7827	Verrucarin J	Prenol lipids	Sesquiterpenoids	56446.9	40307.7	69410.5	55998.6	46923.3	38911.7	5017.4	4564.03	5117.72	7262.29	5462.82	6082.52	1.33347	1.1184e-05	4.7546e-05	9.0092	3.1714	up	0
POS_3045	9s,13r-12-Oxophytodienoic Acid	Fatty Acyls	Eicosanoids	87029.8	78921.1	93089	83665.5	77623.9	80307.1	203772	179639	198299	217068	174119	220963	1.36696	4.452e-07	3.0465e-06	0.42137	-1.2468	down	0
POS_8900	Echinenone	Prenol lipids	Tetraterpenoids	218683	260590	224787	239362	243435	228280	73844.3	101134	169020	47945.1	130059	35943	1.24905	0.00022642	0.0006553	2.436	1.2845	up	C08592
POS_375	Nicotinamide	Organoheterocyclic compounds	Pyridinecarboxylic acids and derivatives	23538.2	23827.3	53874.6	19011.8	19062.1	21268.3	70169.6	40329.5	48284.6	57085.2	86672.7	57036.4	1.01748	0.0086979	0.018114	0.46239	-1.1128	down	C00153
POS_2926	2,3-Dihydroxypropyl tetradecanoate	Glycerolipids	Monoradylglycerols	90537.4	117859	83251.4	139159	70136.4	89600.1	14977.8	16531.8	14477.7	11831.5	21394.1	6678.14	1.29609	4.8908e-05	0.00016915	6.9398	2.7949	up	0
POS_2954	Dihydro-3-methylene-4-[(2E)-3-methyl-4-(tetrahydro-4-methyl-5-oxo-2-furanyl)-2-buten-1-yl]-, (4R)-2(3H)-furanone,	Prenol lipids	Terpene lactones	105214	43827.2	78425.3	70569.9	46454	97529	30733.8	26410.2	26517.9	34165.8	25720.6	30448.6	1.13442	0.0036498	0.0080564	2.5711	1.3624	up	0
POS_3157	Nephrosteranic acid	Organoheterocyclic compounds	Gamma butyrolactones	37397	31597	40413.3	31465.6	30152	28603.9	109923	99635.3	98603	93550.2	88027.1	96735.5	1.38929	3.7494e-09	1.067e-07	0.34909	-1.5183	down	0
POS_4945	3-[(Acetyloxy)methyl]-5-[(1R,4aR,8aR)-decahydro-5,5,8a-trimethyl-2-methylene-1-naphthalenyl]-, methyl ester, (2Z)-2-pentenoic acid	Prenol lipids	Diterpenoids	6.20081e+07	6.23991e+07	6.17942e+07	6.01699e+07	5.84937e+07	5.2385e+07	1.23382e+08	1.45157e+08	1.27741e+08	1.3525e+08	1.16435e+08	1.20006e+08	1.37331	2.1975e-07	1.6576e-06	0.46186	-1.1145	down	0
POS_5986	Icariside F2	Organooxygen compounds	Carbohydrates and carbohydrate conjugates	257826	343987	282349	281291	325941	308946	560453	671028	663017	536204	738972	572201	1.3333	6.2236e-06	2.9227e-05	0.47158	-1.0844	down	0
POS_1776	Pantothenic acid	Carboxylic acids and derivatives	Amino acids, peptides, and analogues	396322	300653	444547	331783	286137	287519	971292	731277	675734	1.04632e+06	687481	998501	1.26206	0.00015549	0.00046843	0.4121	-1.2789	down	C00864
POS_363	Phenylacetaldehyde	Benzenoids	Phenylacetaldehydes	90563.9	83841.5	86969.3	88217.6	85017.6	96576.4	183194	207529	192665	184167	189385	190469	1.39149	1.0974e-09	4.3803e-08	0.45908	-1.1232	down	C00601
POS_4058	Poldine	Benzenoids	Diphenylmethanes	7629.84	7833.41	10948.3	10675.1	9133.14	6029.66	56534.1	57641.7	53456.8	64971.7	50379.9	55456.5	1.38792	8.9414e-09	1.6592e-07	0.15445	-2.6948	down	0
POS_8101	[(2R,3S,4S,5R,6S)-3,4,5-Trihydroxy-6-[(2S,3R,4S,5S,6R)-3,4,5-trihydroxy-6-(hydroxymethyl)oxan-2-yl]oxyoxan-2-yl]methyl 8-methylnonanoate	Saccharolipids		6662.64	5932.33	7087	9449.05	5778.59	6719.54	25611.9	25788.8	28529.2	36635.8	25199.8	21806.4	1.32484	9.8653e-06	4.2192e-05	0.25146	-1.9916	down	0
POS_12028	gamma-Aminobutyrate	Carboxylic acids and derivatives	Amino acids, peptides, and analogues	22589.4	12704.5	18597	17507.5	11067.7	15908.9	67286	48945.5	57689.1	52508	55179.6	55081.4	1.37137	5.6104e-08	6.1077e-07	0.3043	-1.7164	down	0
POS_4314	(2,6,6-Trimethyl-4-oxo-2-cyclohexen-1-yl)methyl beta-D-glucopyranoside	Organooxygen compounds	Carbohydrates and carbohydrate conjugates	14369.8	9730.46	13321.2	8712.45	10456	13211.4	4603.57	3808.89	1956.78	4711.56	3691.92	4960.78	1.29509	7.5297e-05	0.00024704	3.0407	1.6044	up	0
POS_12389	(2S,3R,4S,5S,6R)-2-[4-[(3S,3aR,6S,6aR)-6-[3,5-Dimethoxy-4-[(2S,3R,4S,5S,6R)-3,4,5-trihydroxy-6-(hydroxymethyl)oxan-2-yl]oxyphenyl]-1,3,3a,4,6,6a-hexahydrofuro[3,4-c]furan-3-yl]-2,6-dimethoxyphenoxy]-6-(hydroxymethyl)oxane-3,4,5-triol	Lignans, neolignans and related compound		7158.13	6535.58	7344.28	6013.3	6145.9	6066.01	1145.51	1002.72	724.268	1268.95	675.271	1030.52	1.38845	9.0061e-09	1.6592e-07	6.959	2.7989	up	0
POS_4982	(E)-1,4-Bis(4-hydroxy-3-methoxyphenyl)-2,3-dimethylbut-2-ene-1,4-dione	Others		552.902	698.228	518.267	488.765	431.799	510.315	3341.17	3258.3	3061.77	2255.88	2950.2	2642.88	1.37104	1.9726e-07	1.5118e-06	0.18822	-2.4095	down	0
POS_5857	(E)-3-(4-Methoxyphenyl)-1-[2,4,6-trimethoxy-3-(3-methylbut-2-enyl)phenyl]prop-2-en-1-one	Linear 1,3-diarylpropanoids	Chalcones and dihydrochalcones	8163.08	6474.82	9179.09	8469.33	6918.21	7572.27	1726.11	1238.97	906.116	1070.65	699.684	715.83	1.37996	1.2604e-07	1.0233e-06	8.4169	3.0733	up	0
POS_3669	(E)-4-[(1R,2S,3S,4R,8As)-2,3,4-trihydroxy-2,5,5,8a-tetramethyl-3,4,4a,6,7,8-hexahydro-1H-naphthalen-1-yl]but-3-en-2-one	Prenol lipids	Sesquiterpenoids	11238.8	8323.46	12214.8	10406.9	10179.3	10737.7	22347.7	22837.5	18508.6	22017.1	20989	25759.8	1.33384	5.7518e-06	2.7278e-05	0.47755	-1.0663	down	0
POS_7676	[3,4,5-Trihydroxy-6-[(3,4,5-trihydroxyoxan-2-yl)oxymethyl]oxan-2-yl] 2,6,6-trimethylcyclohexene-1-carboxylate	Organooxygen compounds	Carbohydrates and carbohydrate conjugates	13861.6	9418.53	16831.3	11474.3	10669.7	10604.7	4601.13	4220.17	4105.94	5499.32	4044.18	4387.37	1.2717	0.00017508	0.00052089	2.728	1.4478	up	0
POS_6966	[8-[2-(3-Methylbutanoyloxy)propan-2-yl]-2-oxo-8,9-dihydrofuro[2,3-h]chromen-9-yl] 3-methylbutanoate	Coumarins and derivatives	Furanocoumarins	1150.94	2008.94	2038.16	2725.5	868.523	2384.8	5811.52	8979.05	4998.78	5976.71	5956.51	5155.98	1.25261	0.00020384	0.00059537	0.29981	-1.7379	down	0
POS_3121	1,2-Didehydrotanshinone IIA	Prenol lipids	Diterpenoids	19563.7	15551.7	23727.1	19519.4	16077.6	17150.7	6939.21	5648.39	6254.56	8046.24	5794.45	7915.28	1.32544	1.791e-05	7.0608e-05	2.7628	1.4661	up	0
POS_4396	2-(Hydroxymethyl)-6-(6-hydroxy-6-methyl-3-propan-2-ylcyclohex-3-en-1-yl)oxyoxane-3,4,5-triol	Prenol lipids	Terpene glycosides	4600.16	2532.12	5518.18	5445.93	9471.35	2270.85	30131.6	28608.9	14871.1	31353.4	25518.7	31847.8	1.29212	5.9206e-05	0.00020113	0.18809	-2.4105	down	0
POS_8732	2-(Hydroxymethyl)-6-[5-[3-(hydroxymethyl)-5-(3-hydroxypropyl)-7-methoxy-2,3-dihydro-1-benzofuran-2-yl]-2-methoxyphenoxy]oxane-3,4,5-triol	Flavonoids		3115.68	579.174	2009.18	1188.68	1424.93	413.077	26435.3	28948.4	17711.6	24111.4	19102.6	21565.4	1.35545	1.3395e-06	7.9211e-06	0.065287	-3.9371	down	0
POS_9072	2-[4-[4-[Hydroxy-(4-hydroxy-3-methoxyphenyl)methyl]-3-(hydroxymethyl)oxolan-2-yl]-2-methoxyphenoxy]-6-(hydroxymethyl)oxane-3,4,5-triol	Lignans, neolignans and related compound		3066.04	3517.03	2297.42	3332.41	2653.33	2588.31	6435.63	7870.13	7526.96	7078.98	7819.84	7219.04	1.38264	2.3795e-08	3.4024e-07	0.38772	-1.3669	down	0
POS_6561	2-Phenylethyl 3-O-(4-carboxy-3-hydroxy-3-methylbutanoyl)-beta-D-glucopyranoside	Saccharolipids		2380.3	1603.81	2903.39	2388.64	1920.18	2190.95	19926.1	18474.3	18284.3	23299.6	17047.1	21691.1	1.38003	5.5174e-08	6.0755e-07	0.11292	-3.1466	down	0
POS_4310	3-(4-Hydroxyphenyl)propanoic acid 3-(4-hydroxy-3-methoxyphenyl)propyl ester	Phenols	Methoxyphenols	240.027	200.564	211.321	126.286	194.816	526.726	28246.6	28488.5	23793	33751.9	30704	37081.4	1.374	1.1841e-07	9.6953e-07	0.008125	-6.9434	down	0
POS_5026	3-[2-Methoxy-3-[(2S,3R,4S,5S,6R)-3,4,5-trihydroxy-6-(hydroxymethyl)oxan-2-yl]oxyphenyl]propanoic acid	Organooxygen compounds	Carbohydrates and carbohydrate conjugates	4062.66	4075.22	4584.66	3595.82	3396.48	4168.88	28390.2	20477	27383.7	30679.4	25904	35829.7	1.34891	2.5156e-06	1.3169e-05	0.14189	-2.8172	down	0
POS_5684	3-O-Methylfunicone	Organooxygen compounds	Carbonyl compounds	3444.47	3466.02	2742.87	2799.37	2765.23	3263.97	7891.23	7646	8985.62	9486.54	8442.91	9338.66	1.38006	4.4341e-08	5.1179e-07	0.35084	-1.5111	down	0
POS_5374	3,5,5-Trimethyl-4-[3-[(beta-D-glucopyranosyl)oxy]butyl]-3-cyclohexen-1-ol	Fatty Acyls	Fatty acyl glycosides	8845	6802.44	10063.1	8135.02	6762.12	6545.6	23367.6	17921.7	19626.1	16335.4	15380.1	26050.9	1.26587	0.00016827	0.00050218	0.41226	-1.2784	down	0
POS_5690	4-[3-(Beta-D-glucopyranosyloxy)-4-hydroxy-2,6,6-trimethyl-1-cyclohexen-1-yl]-2-butanone	Prenol lipids	Terpene glycosides	30550.1	33050.8	39326.3	24133.5	28668.6	18376.8	7072.46	4462.23	5635.4	9349.74	32230.9	9072.48	1.00975	0.015345	0.030062	2.3883	1.256	up	0
POS_1194	4-Hydroxy-3-methoxycinnamaldehyde	Phenols	Methoxyphenols	3686.42	3776.91	4553.26	4850.57	4158.11	4171.05	25307.7	21021.7	22452.4	24863.5	20636.6	25398.1	1.38964	6.6412e-09	1.3396e-07	0.18358	-2.4455	down	C02666
POS_6080	4-Hydroxy-6-methyl-3-methylidene-5-[5-[(2R,3R,4S,5S,6R)-3,4,5-trihydroxy-6-(hydroxymethyl)oxan-2-yl]oxypentan-2-yl]-3a,4,7,7a-tetrahydro-1-benzofuran-2-one	Prenol lipids	Terpene lactones	26142.7	25892.7	24434.8	26252.2	26016.5	26139.9	8122.83	9684.92	9000.3	9288.27	7184.51	9299.02	1.39288	9.0867e-11	9.1675e-09	2.9032	1.5376	up	0
POS_6732	5-Hydroxy-7-[4-hydroxy-2-methoxy-3-(3-methylbut-2-enyl)phenyl]-2,2-dimethyl-7,8-dihydropyrano[3,2-g]chromen-6-one	Isoflavonoids	Isoflavans	15930.2	12489.2	16717.7	13112.6	13680.2	13287.5	2122.49	2141.48	2405.91	2296.52	1459.78	2544.5	1.37954	9.7132e-08	8.8621e-07	6.5462	2.7107	up	0
POS_9695	5-Methoxy-3-methyl-4-[(2S,3R,4S,5S,6R)-3,4,5-trihydroxy-6-[[(2R,3R,4S,5S,6R)-3,4,5-trihydroxy-6-(hydroxymethyl)oxan-2-yl]oxymethyl]oxan-2-yl]oxy-3H-benzo[f][2]benzofuran-1-one	Organooxygen compounds	Carbohydrates and carbohydrate conjugates	2598.8	2820.78	3105.38	2871.75	2675.66	2351.94	9149.67	7450.98	7686.78	9787.02	7474.8	9838.62	1.35594	1.5742e-06	9.0307e-06	0.32404	-1.6257	down	0
POS_7497	6-[2-Hydroxy-3-methyl-3-[(2S,3R,4S,5S,6R)-3,4,5-trihydroxy-6-(hydroxymethyl)oxan-2-yl]oxybutyl]-5,7-dimethoxychromen-2-one	Fatty Acyls	Fatty acyl glycosides	5000.02	3944.88	4766.9	4561.04	4127.67	4825.64	20192.9	19541.3	19049	20158.9	17752.8	19557.2	1.39708	5.2655e-11	7.2062e-09	0.23619	-2.082	down	0
POS_10854	9-Methoxy-7-[4-[3,4,5-trihydroxy-6-[[3,4,5-trihydroxy-6-(hydroxymethyl)oxan-2-yl]oxymethyl]oxan-2-yl]oxyphenyl]-[1,3]dioxolo[4,5-g]chromen-8-one	Isoflavonoids	Isoflavonoid O-glycosides	14525.1	10278.8	15275.3	13569.9	11840.7	12751.9	2766.72	2743.78	2693.28	2570.67	2473.46	2974.67	1.3713	5.3632e-07	3.568e-06	4.8456	2.2767	up	0
POS_3914	Acebutolol	Organooxygen compounds	Carbonyl compounds	5621.33	3335.34	2083.27	4131.17	3661.74	2872.27	25173.4	18277.3	19864.7	27264.5	19363.7	28947.7	1.33557	7.0689e-06	3.1943e-05	0.15906	-2.6524	down	0
POS_5416	Ailanthone	Prenol lipids	Terpene lactones	1894.83	2024.42	2591.14	1970.74	2496.89	1804.3	25831.9	19251	24385	23872.9	19800.8	25169.8	1.38628	2.1485e-08	3.216e-07	0.094701	-3.4005	down	0
POS_5324	Alantrypinone	Organoheterocyclic compounds		78.8398	24.7194	149.383	125.23	32.6946	52.1977	19301.5	14909.2	15098.8	18698.3	17520.3	20051.4	1.38375	1.45e-08	2.3517e-07	0.0044726	-7.8047	down	0
POS_9730	Alkergot	Alkaloids and derivatives	Lysergic acids and derivatives	5043.35	11374.3	13600.8	11728.8	11050.9	7174.29	1933.69	1491.69	1681.53	2457.55	1791.61	2945.73	1.2144	0.00043756	0.0011548	4.8203	2.2691	up	0
POS_5350	alpha-Spinasterol	Steroids and steroid derivatives	Stigmastanes and derivatives	428998	322634	221182	430854	224593	438510	303828	205414	225053	128573	192745	83755.6	1.06354	0.0080731	0.016923	2.0613	1.0436	up	0
POS_9631	Benzyl 2-O-(D-apio-beta-D-furanosyl)-3-O-(beta-D-glucopyranosyl)-beta-D-glucopyranoside	Organooxygen compounds	Carbohydrates and carbohydrate conjugates	3566.65	2770.76	3445.67	3594.82	563.644	3152.64	23793.3	21998.8	21192.4	25138.3	16896.8	25172	1.36936	3.7635e-07	2.651e-06	0.12903	-2.9542	down	0
POS_3507	Cafestol	Organoheterocyclic compounds		10854.9	13556	17754.4	16231.9	13932	13462.6	47996.6	35464.8	33850.6	54258.9	38091.5	49131.4	1.29888	4.4071e-05	0.00015465	0.33916	-1.56	down	0
POS_13467	Chlorophyll b from Chlorella	Organoheterocyclic compounds	Chlorins	1109	1569.08	1885.42	784.859	303.614	500.758	10698.3	17825.8	16596.5	6116.23	26178	4480.46	1.06388	0.0054292	0.01178	0.072015	-3.7956	down	0
POS_490	Cinnamaldehyde	Cinnamic acids and derivatives		8681.65	7949.99	8982.44	8561.5	8305.19	9143.13	23363.2	22302.8	21211.6	24547.7	21060.4	24068	1.38785	6.712e-09	1.3396e-07	0.38007	-1.3957	down	C00903
POS_7125	Cirsimarin	Flavonoids	Flavonoid glycosides	10146.5	10185.7	11244.8	10317.5	9462.56	9264.94	1435.19	1630.33	1594.8	1496.16	1309.85	908.578	1.39384	9.8036e-10	4.0834e-08	7.2796	2.8639	up	0
POS_8212	cyclo[DL-Ala-DL-Trp-DL-Ala-DL-Val-Gly]	Carboxylic acids and derivatives	Amino acids, peptides, and analogues	8884.26	8853.23	11338.5	9391.6	7638.07	8773.6	22306.6	20247.9	19073.6	23426.1	17420	24323.2	1.33379	8.1737e-06	3.6068e-05	0.43767	-1.1921	down	0
POS_2253	Cytidine	Nucleosides, nucleotides, and analogues		5132.68	11381.9	10588.9	9255.62	13882.9	3473.57	25362.8	21091.2	15440.9	26204.6	19167.4	26270.7	1.20977	0.00085259	0.0021215	0.4138	-1.273	down	0
POS_7374	Cytidine 5'-diphosphocholine	Pyrimidine nucleotides	Pyrimidine ribonucleotides	4042.3	3721.75	4523.98	4563.7	2734.76	4645.14	33432.7	17559.5	25972.7	28001.3	10354.9	32760	1.22856	0.00054793	0.0014225	0.17613	-2.5053	down	0
POS_3579	Desmedipham	Benzenoids	Phenylcarbamic acid esters	27311.5	24838.4	28929.4	26997.6	26131.2	26770.5	6765.73	8474.73	8268.3	8467.68	6932.25	7429.15	1.39586	4.3597e-10	2.3203e-08	3.39	1.7613	up	0
POS_5322	Diflufenican	Benzenoids	Anilides	114.597	3687.87	79.3123	3247.28	2729.86	5615.96	29811.9	32160.7	30166.6	28187.1	21773.1	27439.6	1.37725	2.4991e-07	1.8276e-06	0.092292	-3.4376	down	0
POS_9764	Ergocristam	Alkaloids and derivatives	Lysergic acids and derivatives	9517.89	7042.48	9951.82	5162.02	9017.34	7403.15	3771.61	2594.77	2674.05	3808.78	2482.51	3959.3	1.24067	0.00031249	0.00086025	2.5825	1.3688	up	0
POS_5691	gamma-Tocotrienol	Prenol lipids	Quinone and hydroquinone lipids	32676.5	25354.3	25807.5	28748.7	25371.4	31489.8	8473.75	9146.95	7250.07	7884.2	9020.22	8380.61	1.37446	3.3205e-07	2.3739e-06	3.3877	1.7603	up	C14155
POS_5737	Gardneramine	Organoheterocyclic compounds	Indoles	14158.3	10576.3	16690.3	10855.5	12175.3	11163.6	5492.76	4265.27	5184.43	7110.64	3995.22	7266.38	1.24362	0.00031443	0.0008631	2.265	1.1795	up	0
POS_8334	Hypocrellin B	Others		6854.05	7437.71	8177.11	6765.79	6289.4	7973.14	17990	17806.9	18041.8	13429.8	20136.8	19843.2	1.33111	6.2019e-06	2.9227e-05	0.4061	-1.3001	down	0
POS_5689	Isoapetalic acid	Organoheterocyclic compounds	1-benzopyrans	7616.99	6592.81	8669.36	7145.29	6806.31	7113.09	4435.87	3248.93	3839.12	3658.48	3551.65	3610.92	1.35838	1.9132e-06	1.0594e-05	2.0448	1.0319	up	0
POS_5071	Jaceidin	Flavonoids	O-methylated flavonoids	14739.6	10166.8	24698.5	17396	15218.7	17034.3	23971	47181.1	44472.3	60004.9	35283.7	57105.1	1.29418	5.8753e-05	0.0002003	0.33892	-1.561	down	0
POS_4705	Jacobine N-oxide	Others		15434.2	10350.5	16420.6	13856.2	12824.7	13242.5	2701.99	2576.67	2208.49	2628.09	2577.35	2965.11	1.36515	1.1178e-06	6.7777e-06	5.2827	2.4013	up	0
POS_5073	Junipediol A 8-glucoside	Organooxygen compounds	Carbohydrates and carbohydrate conjugates	6244.68	4953.45	5756.76	12304.2	5177.56	12033.7	18641.2	15129	17579.8	14774.4	14860.3	15925.2	1.18795	0.00090659	0.0022442	0.49477	-1.0152	down	0
POS_5029	Junipediol B 8-O-glucoside	Organooxygen compounds	Carbohydrates and carbohydrate conjugates	11451.9	8964.18	11216.5	11090.9	9730.14	11553.9	2733.83	1529.1	1944.61	1885.55	2470.94	1723.73	1.38951	2.9623e-08	3.8349e-07	5.583	2.481	up	0
POS_10122	L-Glutathione (oxidized form)	Carboxylic acids and derivatives	Amino acids, peptides, and analogues	40171.3	37944	52056	54607.3	43926.6	36840.1	14394.1	16532.2	23792.3	17795.7	23283.5	11270	1.27975	0.00011449	0.00035843	2.3878	1.2557	up	0
POS_5079	Loratadine	Organoheterocyclic compounds		851.535	887.086	1697.99	512.957	805.398	316.897	24915.3	21502.8	20539.7	25337.2	24955.5	26729.9	1.38595	5.8559e-09	1.2466e-07	0.035498	-4.8161	down	C06818
POS_7964	Lyalosidic acid	Prenol lipids	Terpene glycosides	2912.83	2349.25	4030.55	2742.66	2958.13	3573.26	35326.2	29235.1	27699.5	35527.1	27916.3	37776.6	1.37642	1.1811e-07	9.6953e-07	0.09783	-3.3536	down	0
POS_8494	Methyl 2-[(1R,5R,6R,13S,14S,16S)-14-acetyloxy-6-(furan-3-yl)-1,5,15,15-tetramethyl-8,17-dioxo-7-oxatetracyclo[11.3.1.02,11.05,10]heptadec-10-en-16-yl]acetate	Prenol lipids	Triterpenoids	12080.7	9681.39	13573.3	9790.35	8930.85	10042	2263.28	1206.97	1248.91	2022	1317.55	2239.67	1.36044	1.5391e-06	8.8825e-06	6.6478	2.7329	up	0
POS_7640	Mundulone acetate	Isoflavonoids	Isoflavans	1889.4	1869.53	3019.58	1773.02	1631.95	2640.29	9037	6074.56	5664.37	6098.31	5508.39	7802.11	1.33365	7.4359e-06	3.3444e-05	0.34309	-1.5433	down	0
POS_1361	Myristicin	Organoheterocyclic compounds		5467.25	4399.59	4447.12	4286.51	3820.45	4246.62	10746.5	7623.72	8367.95	10063.8	8456.82	12456.2	1.25698	0.00018907	0.00055905	0.47315	-1.0796	down	C10480
POS_6121	Nodakenin	Coumarins and derivatives	Furanocoumarins	654.892	590.799	791.506	239.798	639.166	366.085	1645.55	2134.39	1185.38	1180.92	2441.22	1376.65	1.14471	0.0017147	0.0040659	0.32881	-1.6047	down	0
POS_7249	Paeonolide	Others		997.853	724.556	759.196	960.72	653.505	996.937	18628.6	17808.1	17422	20190.9	19594.7	21911.1	1.39098	1.275e-09	4.8123e-08	0.043785	-4.5134	down	0
POS_4026	Papaverine	Organoheterocyclic compounds	Benzylisoquinolines	19188.1	15239	22433.5	16470.7	15236.6	16253.6	4366.96	4151.16	3503.47	4008.62	2493.15	4126.93	1.35479	2.2689e-06	1.2164e-05	4.7776	2.2563	up	0
POS_7158	Petunidin 3-galactoside	Flavonoids	Flavonoid glycosides	29199.1	15156.5	33485.3	21501.9	20370.6	23343.1	1612.14	906.99	1039.16	870.824	746.753	1155.49	1.31974	2.888e-05	0.0001052	25.261	4.6589	up	0
POS_12025	Ritonavir	Carboxylic acids and derivatives	Amino acids, peptides, and analogues	9163.48	5016.89	9728.72	7977.94	7917.38	7980.09	48991.8	38230.7	37153.2	46232.3	32205.4	39645.7	1.37245	1.8635e-07	1.4397e-06	0.20582	-2.2805	down	C07240
POS_591	Sabinene	Prenol lipids	Monoterpenoids	7824.75	9334.81	10485.1	9953.49	4633.76	9291.57	34039.3	28819.9	24541.2	32969.4	26585.3	31362.1	1.35887	7.5542e-07	4.7611e-06	0.29759	-1.7486	down	0
POS_8895	Satratoxin H	Prenol lipids	Sesquiterpenoids	41971.1	24749.3	58883.4	31710.6	25797.7	27133	5081.89	5062.16	3522.65	6113.76	3097.41	8515.62	1.21024	0.00082881	0.0020731	6.6588	2.7353	up	0
POS_1181	Serotonin	Organoheterocyclic compounds	Tryptamines and derivatives	9797.47	10984	10825.3	16952.3	12574.1	14796.1	44163.8	30061.6	29399.4	44906.7	26350.2	46061.2	1.24931	0.00029016	0.00081742	0.35793	-1.4823	down	C00780
POS_4389	Staphylin	Organooxygen compounds	Carbohydrates and carbohydrate conjugates	2512.79	1105.65	1538.47	2295.41	2024.04	1078.66	8783.21	7310.8	7115.99	8814.88	7169.7	8930.6	1.36709	3.3949e-07	2.4091e-06	0.22357	-2.1612	down	0
POS_4076	Sulpiride	Benzenoids	Benzenesulfonamides	7668.25	7018.38	8159.09	7167.6	6751.31	8019.43	2196.97	2521.25	1903.38	2377.87	1217.69	2302.74	1.37927	5.8431e-08	6.1881e-07	3.6153	1.8541	up	0
POS_4488	Sweroside	Organooxygen compounds	Carbohydrates and carbohydrate conjugates	6705.05	5097.9	7611.21	5308.09	6115.45	5699.08	4082.31	1454.13	1608.71	2342.53	1455.3	2265.22	1.33855	6.8608e-06	3.115e-05	3.3364	1.7383	up	0
POS_4931	Xanthohumol	Linear 1,3-diarylpropanoids	Chalcones and dihydrochalcones	2807.32	2778.78	3308.7	2691.68	2302.64	2658.51	5472.8	5445.09	5281.94	5945.83	5309.59	7270.97	1.32171	1.5094e-05	6.1533e-05	0.47139	-1.085	down	C16417
POS_8369	Xolegel	Organoheterocyclic compounds	Piperazines	9827.37	10096.1	9885.5	9607.14	8974.67	9464.41	18414.7	23000.4	20296.4	20572.6	22610.6	20626.2	1.38516	4.6151e-09	1.1053e-07	0.45014	-1.1516	down	0
NEG_4515	Lactulose	Organooxygen compounds	Carbohydrates and carbohydrate conjugates	4572.22	1933.47	3853.32	5422.01	5998.65	7832.77	14870.3	24657	28150.4	13015.9	29272.5	24868.9	1.28136	7.0226e-05	0.0002336	0.2057	-2.2814	down	C07064
NEG_6571	5-{[4-(beta-D-Glucopyranosyloxy)benzyl]oxy}-3-hydroxy-3-methyl-5-oxopentanoic acid	Organooxygen compounds	Carbohydrates and carbohydrate conjugates	39044.4	36365	46322	38684.6	39076	42819.5	75917.8	86347.1	71775.9	74752.6	64879.2	131846	1.14842	0.0024471	0.0055951	0.47003	-1.0892	down	0
NEG_14002	Quercetin 3-rutinoside 7-galactoside	Flavonoids	Flavonoid glycosides	78290.8	72268.1	82546.6	81982.1	76968.8	76218.5	147604	225200	209481	257696	198817	310550	1.33379	9.5768e-06	4.1141e-05	0.32472	-1.6227	down	0
NEG_8385	(6,6-Dimethylbicyclo[3.1.1]hept-2-yl)methyl 6-O-[(2R,3R,4R)-3,4-dihydroxy-4-(hydroxymethyl)tetrahydro-2-furanyl]-beta-D-glucopyranoside	Prenol lipids	Terpene glycosides	955.669	716.498	806.232	798.431	719.485	486.176	5779.7	4107.39	4140.42	5208.44	4164.14	4264.65	1.38138	2.2855e-08	3.3685e-07	0.17068	-2.5506	down	0
NEG_3261	8-(2-Oxo-5-pent-2-enylcyclopent-3-en-1-yl)octanoic acid	Fatty Acyls	Eicosanoids	10013.1	13374.8	15998.6	15312.6	16365.9	14980.2	58399.7	35583.7	34226.5	38551.1	33924.3	31676.4	1.37206	2.2292e-07	1.6671e-06	0.41218	-1.2786	down	0
NEG_7090	Pentose-Hexose + C10H17	Prenol lipids	Terpene glycosides	528.903	638.82	561.611	751.768	226.902	568.608	2396.98	3334.14	2836.69	3278.18	2662.53	3556.69	1.37852	9.6136e-08	8.8556e-07	0.17427	-2.5206	down	0
NEG_3142	Salicin	Organooxygen compounds	Carbohydrates and carbohydrate conjugates	1119.24	1269.23	1288.8	1220.92	1355.87	1673.6	465.824	409.087	644.619	497.992	461.572	1194.28	1.14467	0.0017839	0.0042094	2.0596	1.0424	up	C01451
NEG_2615	Formononetin	Isoflavonoids	O-methylated isoflavonoids	38266.7	31750.5	37506	36858.9	32935.7	36433.6	154865	87016.9	81461.8	100755	77555	98624.2	1.36381	5.8901e-07	3.8649e-06	0.39991	-1.3222	down	C00858
NEG_1009	Arginine	Carboxylic acids and derivatives	Amino acids, peptides, and analogues	29993.3	44854.2	29842.9	34196	43562.3	38415.5	104148	103253	162207	108713	149403	122355	1.32241	1.2726e-05	5.3474e-05	0.28494	-1.8113	down	C00062
NEG_5563	Lactose	Others		3.89212e+06	3.56754e+06	5.38269e+06	5.28875e+06	4.31909e+06	4.89594e+06	1.51973e+07	2.98951e+07	1.82339e+07	1.63641e+07	1.45893e+07	1.52376e+07	1.2392	0.0003523	0.00095071	0.24161	-2.0493	down	0
NEG_11723	Rhamnetin 3-sophoroside	Flavonoids	Flavonoid glycosides	386814	195073	651713	459814	585175	282213	185166	131523	61640.6	122369	113852	46970.6	1.13917	0.002592	0.0058468	4.4798	2.1635	up	0
NEG_4520	Trehalose	Organooxygen compounds	Carbohydrates and carbohydrate conjugates	5.10251e+06	4.52595e+06	7.18291e+06	6.79221e+06	5.55642e+06	5.72219e+06	1.75031e+07	3.35877e+07	2.16492e+07	1.9495e+07	1.70612e+07	1.79641e+07	1.25296	0.00024198	0.00069199	0.26484	-1.9168	down	C01083
NEG_6381	3-[(7S,8S)-5-Hydroxy-2,2,7,8-tetramethyl-6-oxo-7,8-dihydropyrano[3,2-g]chromen-10-yl]-3-phenylpropanoic acid	Organoheterocyclic compounds	1-benzopyrans	88907.2	66390.2	91146.7	82378.2	60935.1	73649	14778.4	13407.9	11228.6	19586.8	10494.7	20749.7	1.35732	2.1979e-06	1.1896e-05	5.117	2.3553	up	0
NEG_9789	4-[(E)-3-[(2R,3R,4S,5S,6R)-3-[(2S,3R,4R)-3,4-Dihydroxy-4-(hydroxymethyl)oxolan-2-yl]oxy-4,5-dihydroxy-6-(hydroxymethyl)oxan-2-yl]oxybut-1-enyl]-3,5,5-trimethylcyclohex-2-en-1-one	Fatty Acyls	Fatty acyl glycosides	28236.6	22119.5	31139.7	27568.5	23567	23885.2	120583	103913	98062	133996	95263.2	137582	1.3501	2.4413e-06	1.2993e-05	0.2293	-2.1247	down	0
NEG_5891	Benzyl alcohol + Hex-Pen	Organooxygen compounds	Carbohydrates and carbohydrate conjugates	22922.8	20442.7	19658.4	20068.2	20099.8	19438.9	1.03649e+06	940834	857508	1.12345e+06	855664	1.16989e+06	1.38111	5.878e-08	6.1881e-07	0.020656	-5.5973	down	0
NEG_566	Methionine	Carboxylic acids and derivatives	Amino acids, peptides, and analogues	166354	127808	145776	179419	170751	176201	66795.1	64426.9	61468.2	58433.3	53911.1	44397.7	1.35416	1.7875e-06	1.0014e-05	2.8491	1.5105	up	C00073
NEG_9835	3,5,5-Trimethyl-4-[3-[(6-O-beta-D-xylopyranosyl-beta-D-glucopyranosyl)oxy]butyl]-2-cyclohexen-1-one	Fatty Acyls	Fatty acyl glycosides	5845.39	5791.45	5717.68	3601.73	4455.47	5807.33	45902.3	40496.3	37952.7	51000.5	38871.2	55074.3	1.36524	5.8446e-07	3.8615e-06	0.11646	-3.1021	down	0
NEG_770	Umbelliferone	Coumarins and derivatives	Hydroxycoumarins	8303.7	7739.05	9809.97	9249.98	8334.1	8788.87	47674.9	47478.2	44631.9	46771.1	40073.8	48585.2	1.39561	7.9737e-10	3.5603e-08	0.19127	-2.3863	down	C09315
NEG_9603	2-[3-[4-[1,3-Dihydroxy-1-(4-hydroxy-3-methoxyphenyl)propan-2-yl]oxy-3-methoxyphenyl]propoxy]-6-(hydroxymethyl)oxane-3,4,5-triol	Lignans, neolignans and related compound		241100	242373	262607	259617	256712	273763	545659	534752	498742	577251	484657	587912	1.37635	1.5183e-07	1.2021e-06	0.47708	-1.0677	down	0
NEG_2394	Pinocembrin	Flavonoids	Flavans	23775.2	20905.2	22304.2	25988.3	21434.4	24447.7	271166	84404.6	80470.1	102500	77560.6	81940.6	1.37512	9.8959e-08	8.909e-07	0.27107	-1.8833	down	C09827
NEG_11114	Rutin	Flavonoids	Flavonoid glycosides	155614	132862	137778	151022	119803	138773	55687	56244	55038.2	71536.4	49850.9	87181.6	1.33083	9.4354e-06	4.0717e-05	2.1777	1.1228	up	C05625
NEG_2683	(2r)-1-(2,4-Dihydroxyphenyl)-2-(4-methoxyphenyl)propan-1-one	Flavonoids		199159	170959	186251	193522	167131	190599	1.67355e+06	437022	417196	558795	403135	393819	1.33089	6.7162e-06	3.0745e-05	0.41766	-1.2596	down	0
NEG_2404	Palmitic acid	Fatty Acyls	Fatty acids and conjugates	215407	181143	250841	218697	91624.1	210979	289373	83435.5	65514.8	106578	79636.6	143930	1.08765	0.0061427	0.013224	2.0328	1.0235	up	C00249
NEG_7610	(2S,3S)-3,5,7-Trihydroxy-2-[4-hydroxy-3-[(2S,3R,4S,5S,6R)-3,4,5-trihydroxy-6-(hydroxymethyl)oxan-2-yl]oxyphenyl]-2,3-dihydrochromen-4-one	Flavonoids	Flavonoid glycosides	369176	415980	530164	455779	428898	1.04658e+06	1.32354e+06	1.22984e+06	1.14023e+06	1.36845e+06	1.08791e+06	1.49435e+06	1.22993	0.00040609	0.0010837	0.42803	-1.2242	down	0
NEG_8700	3,4,5-Trihydroxy-6-[5-hydroxy-2-(4-hydroxy-3-methoxyphenyl)-3-methoxy-4-oxochromen-7-yl]oxyoxane-2-carboxylic acid	Flavonoids	Flavonoid glycosides	99393.8	100936	97421.1	105656	95517.3	106470	39654.5	44798.8	46211.7	46211.6	49080.8	56622.4	1.38474	1.4729e-08	2.3517e-07	2.0767	1.0543	up	0
NEG_6752	Dihydrostilbene base + 3O, 1carboxy, O-Hex	Stilbenes	Stilbene glycosides	518297	394190	520679	493040	368601	471328	233335	196327	164408	226894	157189	234331	1.32549	1.8838e-05	7.3659e-05	2.3542	1.2352	up	0
NEG_9816	Flavonol base + 4O, O-MalonylHex	Flavonoids	Flavonoid glycosides	3.067e+06	2.2209e+06	3.15057e+06	2.92697e+06	2.43291e+06	2.78358e+06	742294	766037	735465	965807	595922	1.21043e+06	1.34874	3.6837e-06	1.8672e-05	3.2334	1.693	up	C12638
NEG_7061	Kaempferol 7-O-glucoside	Flavonoids	Flavonoid glycosides	430314	357649	474035	423009	352498	390966	73890.1	49368.2	51517.6	71759.5	52441.6	75952.1	1.38336	6.8859e-08	7.0177e-07	6.7225	2.749	up	0
NEG_7046	Maritimein	Flavonoids	Flavonoid glycosides	521827	460307	530653	575083	563584	566656	268895	219659	224314	246198	221300	240346	1.37678	9.2995e-08	8.7342e-07	2.3283	1.2193	up	0
NEG_2388	Purpurin	Benzenoids	Anthraquinones	157393	134467	192372	138188	144002	154405	54237.7	65081.5	77299.2	73340.6	51561.6	62187.9	1.3262	1.3883e-05	5.7575e-05	2.3291	1.2197	up	0
NEG_8701	Quercetin-3-O-glucosyl-6''-acetate	Flavonoids	Flavonoid glycosides	1.82486e+07	1.424e+07	1.88264e+07	1.90535e+07	1.51617e+07	1.75676e+07	4.79546e+06	4.8002e+06	4.82423e+06	6.46362e+06	4.30904e+06	7.36859e+06	1.35894	1.5047e-06	8.7364e-06	3.0943	1.6296	up	0
NEG_3192	Eriodictyol	Flavonoids	Flavans	159334	122859	167786	152088	117042	136420	101383	64346.2	53400.7	81344.1	52919.2	81717.2	1.29724	6.4649e-05	0.00021669	2.1363	1.0951	up	C05631
NEG_7422	Parishin E	Others		126005	99593.9	137161	120600	102342	102677	276050	405419	414173	537777	328087	618798	1.30397	4.4861e-05	0.00015685	0.24895	-2.0061	down	0
NEG_4146	1-(4-Hydroxyphenyl)-3-[(2R,3R,4S,5S,6R)-3,4,5-trihydroxy-6-(hydroxymethyl)oxan-2-yl]oxypropan-1-one	Fatty Acyls	Fatty acyl glycosides	12563.5	6428.04	7555.96	6677.24	7602.47	8727.96	120031	78620	79692.5	93812.3	72862.2	98791.3	1.38222	4.2144e-08	4.9844e-07	0.097447	-3.3592	down	0
NEG_4870	3-(2-Glucosyloxy-4-methoxyphenyl)propanoic acid	Organooxygen compounds	Carbohydrates and carbohydrate conjugates	24962.3	21440.4	26049.7	25112.9	22195.9	18319.1	92331.5	104988	72996.1	87825	71050.5	84902	1.3545	1.829e-06	1.0187e-05	0.27282	-1.874	down	0
NEG_3233	Cianidanol	Flavonoids	Flavans	45206.6	43518.8	44246	47227.7	42303.2	44314.5	163590	133491	126546	163429	130449	134490	1.37554	8.2008e-08	7.8298e-07	0.32299	-1.6304	down	C06562
NEG_4388	Coumaroyl quinic acid	Organooxygen compounds	Alcohols and polyols	105285	97502.3	105683	101590	88866.1	81460.9	1.91215e+06	1.66368e+06	1.53777e+06	2.11721e+06	1.45045e+06	2.87257e+06	1.3136	2.9139e-05	0.00010574	0.050163	-4.3172	down	0
NEG_3494	Fenhexamid	Benzenoids	Anilides	14016	14164.7	14620.5	15197.5	13402.1	14864.7	73574.5	53796.3	48277.4	53684	50357.5	54238.3	1.39672	7.5759e-11	9.0721e-09	0.27612	-1.8567	down	0
NEG_7493	Hydrangeifolin I	Organooxygen compounds	Carbohydrates and carbohydrate conjugates	4149.55	4867.74	5141.18	4554.39	4052.42	5426.45	73435.6	71936.4	68715.8	77854.5	65549.3	81148.9	1.39504	8.1761e-10	3.5603e-08	0.064329	-3.9584	down	0
NEG_1262	Quinic acid	Organooxygen compounds	Alcohols and polyols	21421.1	14147.7	18953.9	20975.8	17720.1	16586.7	333788	289299	269586	374375	255057	505656	1.31096	3.2516e-05	0.00011667	0.054018	-4.2104	down	C00296
NEG_3581	Sulfo jasmonate	Fatty Acyls	Lineolic acids and derivatives	9076.47	7857.81	11420.4	9106.47	6207.48	7242.7	82844.7	219298	151782	211650	145178	288045	1.32569	1.6715e-05	6.6446e-05	0.04176	-4.5817	down	0
NEG_4237	(Z)-5,8,11-Trihydroxyoctadec-9-enoic acid	Fatty Acyls	Fatty acids and conjugates	28355.7	21860.9	29937.8	27672.6	26127.1	24922.3	94266.7	78373.4	71168.5	97075.9	67786	99608.5	1.3371	6.7394e-06	3.0745e-05	0.31979	-1.6448	down	0
NEG_8969	Isochlorogenic acid B	Others		495850	384921	494915	456847	355659	388191	82551.9	95886.9	93255.9	104267	85188.6	134948	1.36316	1.1663e-06	7.0274e-06	4.1807	2.0637	up	0
NEG_444	Adenine	Organoheterocyclic compounds	Purines and purine derivatives	17724.4	16660.4	18234.6	17616	16033.2	18263.2	53852.8	41115.6	35073.8	43904.5	38691.1	41077.6	1.37642	5.8103e-08	6.1881e-07	0.43585	-1.1981	down	C00147
NEG_2605	Adenosine	Nucleosides, nucleotides, and analogues		14124.1	13767.1	15116.1	13489.5	13180.2	14371.3	42626.4	32391.5	29353.5	37993.6	32685.9	36267.6	1.36919	2.1034e-07	1.5993e-06	0.4152	-1.2681	down	C00212
NEG_1903	Myristic acid	Fatty Acyls	Fatty acids and conjugates	142453	151640	132541	155197	139268	154144	107159	28008.1	31137.2	53373.3	37355.7	27669.3	1.38411	1.8728e-08	2.9412e-07	4.1081	2.0385	up	C06424
NEG_2539	9-(2,3-Dihydroxypropoxy)-9-oxononanoic acid	Fatty Acyls	Fatty acids and conjugates	231259	181549	313690	221195	193392	221323	50561	57287.9	56113.7	65168.1	51898.8	77130.2	1.31618	2.8412e-05	0.00010389	3.691	1.884	up	0
NEG_3234	(-)-Epicatechin	Flavonoids	Flavans	7894.1	7434.99	2971.94	8351.68	6552.34	4163.58	104575	96681.4	93988.7	104250	81198.5	116210	1.38627	3.1622e-08	3.986e-07	0.063251	-3.9828	down	C09727
NEG_13716	3-[6-[[(2R,3R,4R,5S,6S)-3,5-Dihydroxy-6-methyl-4-[(2S,3R,4R,5R,6S)-3,4,5-trihydroxy-6-methyloxan-2-yl]oxyoxan-2-yl]oxymethyl]-3,4,5-trihydroxyoxan-2-yl]oxy-2-(3,4-dihydroxyphenyl)-5,7-dihydroxychromen-4-one	Flavonoids	Flavonoid glycosides	202533	180068	207613	194249	169232	175046	46541.4	59931.6	55710.5	61805.7	52156.1	78363	1.37941	8.2548e-08	7.8298e-07	3.0543	1.6108	up	0
NEG_621	3,4-Dihydroxybenzoic acid	Benzenoids	Benzoic acids and derivatives	301240	246867	311344	287503	256884	272298	64416.5	46645.8	46110.7	54812.8	44444.9	58755.2	1.39069	1.0557e-08	1.8729e-07	5.57	2.4777	up	C00230
NEG_6370	Mangiferin	Organoheterocyclic compounds	1-benzopyrans	156987	131915	149778	157788	141949	139062	42104.2	50579	42989.1	42968.3	41421.8	59444.7	1.38386	2.6935e-08	3.5839e-07	3.0801	1.623	up	0
NEG_8643	Melezitose	Organooxygen compounds	Carbohydrates and carbohydrate conjugates	374237	321488	552810	490357	373085	399741	923860	1.55014e+06	861104	1.00766e+06	720310	966002	1.1745	0.0014484	0.0034689	0.40999	-1.2863	down	C08243
NEG_1184	Methyl gallate	Benzenoids	Benzoic acids and derivatives	124434	97413.7	139850	131171	106108	112514	64360.7	40489.6	34975.1	50442.8	33727.8	50952.4	1.34461	5.0176e-06	2.4155e-05	2.8155	1.4934	up	0
NEG_9829	Raffinose	Organooxygen compounds	Carbohydrates and carbohydrate conjugates	785435	649480	1.20226e+06	1.07005e+06	767540	846143	1.85683e+06	3.42796e+06	1.81523e+06	2.20701e+06	1.48633e+06	2.18753e+06	1.15683	0.0019945	0.0046716	0.3986	-1.327	down	C00492
NEG_6228	2-Phenylethyl 6-O-[(2S,3R,4R)-3,4-dihydroxy-4-(hydroxymethyl)tetrahydro-2-furanyl]-beta-D-glucopyranoside	Organooxygen compounds	Carbohydrates and carbohydrate conjugates	108096	85277.4	108959	102432	73768.1	91827.6	464465	374997	337403	490676	325823	554453	1.31258	2.7035e-05	9.9232e-05	0.22814	-2.132	down	0
NEG_7497	Bioside	Organooxygen compounds	Carbohydrates and carbohydrate conjugates	96227.1	82241.8	91074	97213.6	77054.5	90366.7	425744	370261	342183	442131	334531	484893	1.35883	1.195e-06	7.1105e-06	0.22551	-2.1488	down	0
NEG_7185	Methyl (1R,4aS,9S,10S)-10-acetyloxy-5,9-dihydroxy-1,4a-dimethyl-2-oxo-7-propan-2-yl-10,10a-dihydro-9H-phenanthrene-1-carboxylate	Steroids and steroid derivatives	Hydroxysteroids	46608.1	30163.6	43130.8	44095.2	28007.7	37472.4	128194	105759	89403.2	137071	82813.4	157698	1.24496	0.00029096	0.00081742	0.33389	-1.5826	down	0
NEG_3341	13-HoTrE	Fatty Acyls	Lineolic acids and derivatives	56124.8	108089	55043	57845.5	48931.6	56445	1.26863e+06	436640	432765	490425	421425	403812	1.39089	2.9387e-09	8.7979e-08	0.14587	-2.7773	down	0
NEG_1339	2,4-Dihydroxy-6-propylbenzoic acid	Benzenoids	Benzoic acids and derivatives	103524	93184.5	102557	101985	91031.6	102396	2469.91	2111.81	2214.01	2012.25	2229.62	2373.02	1.4006	2.3304e-11	5.3036e-09	45.296	5.5013	up	0
NEG_4953	3-O-Acetylpadmatin	Flavonoids	O-methylated flavonoids	51523.3	55269.4	47574	55835.4	51550.7	54904.1	145554	127326	119612	129020	111553	132591	1.39011	1.243e-08	2.0891e-07	0.42554	-1.2326	down	0
NEG_8971	3,5-Dicaffeoylquinic acids	Organooxygen compounds	Alcohols and polyols	1.55336e+06	1.39851e+06	1.72399e+06	1.4982e+06	1.44202e+06	1.4426e+06	187638	279559	287531	321989	265944	385661	1.39053	5.3582e-09	1.1666e-07	4.8997	2.2927	up	0
NEG_4498	Boscalid	Benzenoids	Diphenylmethanes	53727.6	43099.6	54855.2	51204.4	43590.3	47045.1	4525.32	3950.63	3304.82	1582.8	2758.11	4244.2	1.39079	1.0878e-08	1.8947e-07	15.441	3.9487	up	0
NEG_1080	Caffeic acid	Cinnamic acids and derivatives	Hydroxycinnamic acids and derivatives	209926	130024	166741	174987	130708	195706	50946.7	46400.9	47705.2	52984.8	37076.9	58267.8	1.32146	2.5185e-05	9.3156e-05	3.4652	1.7929	up	C01481
NEG_1079	cis-Caffeic acid	Cinnamic acids and derivatives	Hydroxycinnamic acids and derivatives	151002	115482	145956	147185	114867	129415	56538.5	54593.2	51561.8	59905.9	47506	62140.1	1.35271	3.1421e-06	1.6271e-05	2.4298	1.2809	up	0
NEG_4762	Cryptochlorogenic acid	Organooxygen compounds	Alcohols and polyols	8.69043e+06	5.96558e+06	7.28226e+06	7.42858e+06	5.65469e+06	6.65246e+06	2.62348e+06	2.79539e+06	2.62073e+06	3.28213e+06	2.39816e+06	3.47344e+06	1.31456	3.3477e-05	0.00011967	2.3836	1.2531	up	0
NEG_7486	Hispidulin 4'-glucoside	Flavonoids	Flavonoid glycosides	61469.6	53324.7	55486	61618	50309.5	60395.1	9686.06	8759.2	8042.71	9920.27	8130.83	10023.8	1.39293	3.8381e-09	1.067e-07	6.3619	2.6695	up	0
NEG_3461	Hydroxygenkwanin	Others		86364.7	69108.6	83933.7	83440.5	68576.2	78100.6	56964.5	32812.5	29243.1	37216.5	21575.9	36805.9	1.35376	2.0386e-06	1.1224e-05	2.4818	1.3114	up	0
NEG_11397	Isorhamnetin-3-O-galactoside-6''-rhamnoside	Others		79349.1	65253.3	74965.4	71308.5	66236.3	65899.7	16906.2	16286.8	19808.8	23440.5	19042.2	25264.9	1.38427	4.3749e-08	5.1112e-07	3.3946	1.7633	up	0
NEG_4759	Neochlorogenic acid	Organooxygen compounds	Alcohols and polyols	2.68651e+06	1.64353e+06	3.00837e+06	2.55559e+06	1.67713e+06	2.04797e+06	511710	571099	501719	793766	424711	855070	1.27403	0.00016387	0.00049213	3.6071	1.8508	up	C17147
NEG_1815	Olivetolic acid	Benzenoids	Benzoic acids and derivatives	146828	139396	133450	152623	136837	154428	74834.9	16333.2	16241.3	22510.6	15520.3	13738.3	1.39637	1.9911e-10	1.3625e-08	8.5322	3.0929	up	0
NEG_457	Threonic acid	Organooxygen compounds	Carbohydrates and carbohydrate conjugates	137109	158818	147457	155614	174924	164476	49037.9	64222.2	64757.8	51648.1	65056.2	61024.4	1.36779	1.1737e-07	9.6953e-07	2.5496	1.3503	up	C01620
NEG_3340	8-hydroxyoctadeca-9,12,15-trienoic acid	Fatty Acyls	Fatty acids and conjugates	79506.9	73652.2	78685.5	79542.8	68880.1	79859.8	403868	226382	226474	239767	216068	223247	1.39648	3.5618e-11	5.687e-09	0.33875	-1.5617	down	0
NEG_3259	FA 18:4;O	Fatty Acyls	Fatty acids and conjugates	79925.2	69709.5	84425.1	79592.2	70842.1	77257.1	244981	179604	174621	208210	168140	212580	1.36699	3.9279e-07	2.7268e-06	0.40798	-1.2934	down	0
NEG_3375	9-Hydroxy-10E,12Z-octadecadienoic acid	Fatty Acyls	Lineolic acids and derivatives	50299	83464.4	79966.8	86348.2	54902.7	83744.8	638258	208664	211519	222746	212322	170427	1.35789	7.0941e-07	4.5612e-06	0.35645	-1.4882	down	0
NEG_4158	9,12,13-Trihydroxyoctadeca-10,15-dienoic acid	Fatty Acyls	Lineolic acids and derivatives	26214.1	20609.4	18922.5	17293.9	14789.6	23029.3	57986.4	49624.5	48629.2	62871	46820.9	68022.3	1.31696	1.8644e-05	7.3199e-05	0.36495	-1.4542	down	0
NEG_3131	Luteolin	Flavonoids	Flavones	755588	689299	785620	729237	687079	718188	548536	311484	315082	363282	301922	352344	1.38872	1.1563e-08	1.9782e-07	2.2124	1.1456	up	C01514
NEG_10462	Procyanidin B2	Flavonoids	Biflavonoids and polyflavonoids	233.399	587.526	591.02	410.335	1071.55	215.628	33588.9	35040.8	31603.1	24097.6	34478.5	33911.4	1.38059	3.5443e-08	4.4096e-07	0.016283	-5.9404	down	C17639
NEG_4013	Bavachin	Flavonoids	Flavans	3.13885e+06	3.80241e+06	2.42325e+06	3.7034e+06	3.59344e+06	3.97292e+06	1.82657e+07	862521	878131	2.48668e+06	909260	504967	1.23505	0.00029796	0.00082738	3.048	1.6078	up	0
NEG_4445	Licocoumarone	Flavonoids		75950.3	102248	63375.6	85919.8	101091	95731.3	284912	19342.9	22059.2	44403.5	23077.6	11298.4	1.29042	4.0397e-05	0.00014228	3.6356	1.8622	up	0
NEG_6382	Mulberrin	Flavonoids	Flavones	43014.6	45547.3	40250.3	47299.2	44910.8	48018.9	7947.23	1392.88	1518.28	2064.12	1575.7	942.266	1.39461	9.9125e-11	9.1675e-09	29.92	4.9031	up	0
NEG_2178	Uridine	Nucleosides, nucleotides, and analogues		193326	109085	173314	195429	186625	201774	458321	481988	433552	438802	467335	431036	1.36917	1.0288e-07	8.9598e-07	0.39195	-1.3512	down	C00299
NEG_3810	FA 18:1;2O	Fatty Acyls	Fatty acids and conjugates	16134.4	13276.7	14900.7	31578	15458.4	15109.4	56276.9	56957.4	56660.8	63252.8	55155.9	56732.5	1.35857	7.8435e-07	4.8793e-06	0.30723	-1.7026	down	0
NEG_2991	Guanosine	Nucleosides, nucleotides, and analogues		16524.5	14307.5	18241.9	15420.3	14835.6	15187.7	56324.3	58008.6	55903.6	66342.7	55302.2	73023.9	1.37456	1.5529e-07	1.2194e-06	0.25525	-1.97	down	0
NEG_4776	Humantenine	Others		4254.3	2871.4	4266.52	3405.61	5168.69	3754.79	72787.3	45227.2	40268.9	50237.7	38954.4	45491.3	1.3903	4.7632e-09	1.113e-07	0.08978	-3.4775	down	0
NEG_3039	Xanthosine	Nucleosides, nucleotides, and analogues		17988.1	13757.1	18946	16568.9	13418.1	15053.1	44495.8	61885.7	53728.6	72518.1	53976	81140.2	1.34371	4.0672e-06	2.04e-05	0.24679	-2.0186	down	C01762
NEG_3815	(12Z)-9,10-Dihydroxyoctadec-12-enoic acid	Fatty Acyls	Fatty acids and conjugates	2663.22	3757.91	3626.57	7844.41	4219.88	4730.03	18155	14137.2	13880.3	11948.8	12408.6	10085.9	1.30668	3.0482e-05	0.00010978	0.35812	-1.4815	down	C14828
NEG_3762	(9Z,15Z)-12,13-Dihydroxyoctadeca-9,15-dienoate	Fatty Acyls	Fatty acids and conjugates	6942.3	2842.79	9485.46	9060.15	6317.48	7129.19	39408.7	23168.5	22954.3	28317.5	22523.1	22633.1	1.35151	1.042e-06	6.3585e-06	0.2911	-1.7804	down	0
NEG_14254	[4-[4,5-Dihydroxy-6-methyl-3-[3,4,5-trihydroxy-6-(hydroxymethyl)oxan-2-yl]oxyoxan-2-yl]oxy-6-[2-(3,4-dihydroxyphenyl)ethoxy]-3,5-dihydroxyoxan-2-yl]methyl (E)-3-(3,4-dihydroxyphenyl)prop-2-enoate	Organooxygen compounds	Carbohydrates and carbohydrate conjugates	3472.91	3709.42	3036.82	3087.47	4296.03	3131.86	9804.07	7079.38	7996.43	6239.89	8541.54	5607.05	1.27819	7.9709e-05	0.00026062	0.48722	-1.0374	down	0
NEG_11728	[6-(Furan-3-yl)-6,8,12,16,21-pentahydroxy-7,15-dimethyl-9-oxo-3,17,19-trioxaheptacyclo[9.9.3.01,10.02,4.02,7.011,18.015,23]tricosan-14-yl] 2-methylbutanoate	Prenol lipids	Triterpenoids	268.819	272.704	63.4383	381.137	493.026	736.957	42338.4	11494.7	10472.7	13145.9	10537.9	9219.23	1.38126	2.6092e-08	3.5816e-07	0.033656	-4.893	down	0
NEG_3531	1-(2,4-Dihydroxyphenyl)-2-(3,5-dimethoxyphenyl)propan-1-one	Flavonoids		8298.66	7532.38	9756.97	8223.5	6379.85	7967.01	40149.3	18954	18455.8	25739.5	17114.6	23838.5	1.31466	2.1304e-05	8.0988e-05	0.3855	-1.3752	down	0
NEG_5401	1-Myristoyl-sn-glycerol 3-phosphate	Glycerophospholipids	Glycerophosphates	19096.1	25665.7	17882	21069.6	23742.2	20016	34604.5	7480.34	4665.19	11375.2	9303.39	10292.2	1.28939	4.0206e-05	0.00014213	2.4637	1.3008	up	0
NEG_3813	12,13-Dihydroxyoctadec-9-enoic acid	Fatty Acyls	Fatty acids and conjugates	10946.2	8441.84	17998.4	9571.13	9145.32	11527.9	36217.5	20468.4	20658.5	28829.1	19099.5	29655.2	1.18958	0.0009309	0.0022985	0.47476	-1.0747	down	0
NEG_8379	2-(3,4-Dimethoxyphenoxy)-6-[(3,4,5-trihydroxyoxan-2-yl)oxymethyl]oxane-3,4,5-triol	Organooxygen compounds	Carbohydrates and carbohydrate conjugates	13050.5	10528.2	7274.04	11035.4	10327.8	12252.3	6007.63	5084.86	5129.36	5353.94	5067.31	5689.32	1.25741	0.00019336	0.00056996	2.0408	1.0291	up	0
NEG_3681	2-Dodecoxyethyl hydrogen sulfate	Organic sulfuric acids and derivatives	Sulfuric acid esters	10123.9	7571.99	7755.07	8144.8	7619.5	9290.7	6384.71	2717.47	1613.04	4108.09	3284.48	6172.95	1.24967	0.00026841	0.000763	2.3518	1.2338	up	0
NEG_5885	2-O-Glucosyloxy-4-methoxycinnamic acid	Organooxygen compounds	Carbohydrates and carbohydrate conjugates	4096.06	4560.38	4552.65	4028.6	3239.57	4245.82	19836.3	18634.1	17660.7	18874.3	17185.8	22967.4	1.3801	7.4351e-08	7.3498e-07	0.21614	-2.21	down	0
NEG_1314	3-(4-Hydroxy-3-methoxyphenyl)-2-propenoic acid	Cinnamic acids and derivatives	Hydroxycinnamic acids and derivatives	3449.73	2785.02	3879.15	3525.16	2901.46	3845.95	17392	17726.1	16698.8	21088.5	14901.3	19718.7	1.37531	1.5003e-07	1.1977e-06	0.18848	-2.4075	down	0
NEG_15587	3-[(2S,3R,4S,5S,6R)-4,5-Dihydroxy-3-[(2S,3R,4R,5R,6S)-3,4,5-trihydroxy-6-methyloxan-2-yl]oxy-6-[[(2S,3R,4R,5R,6S)-3,4,5-trihydroxy-6-methyloxan-2-yl]oxymethyl]oxan-2-yl]oxy-5-hydroxy-2-(4-hydroxyphenyl)-6-methoxy-7-[(2S,3R,4R,5R,6S)-3,4,5-trihydroxy-6-methyloxan-2-yl]oxychromen-4-one	Flavonoids	Flavonoid glycosides	36958.1	28320	41388.2	33886.3	30806.4	33634.7	8334.74	6455.78	6915.25	9081.09	6589.03	10342.9	1.36688	7.731e-07	4.8407e-06	4.3375	2.1169	up	0
NEG_4571	3-[2-Hydroxy-3-[(2S,3R,4S,5S,6R)-3,4,5-trihydroxy-6-(hydroxymethyl)oxan-2-yl]oxyphenyl]propanoic acid	Organooxygen compounds	Carbohydrates and carbohydrate conjugates	12427	12112.6	11702.2	12417.8	10120.6	13658.9	28462.1	24004.9	25140.5	28569.7	24884.4	34338.7	1.32464	1.3256e-05	5.5454e-05	0.44083	-1.1817	down	0
NEG_3402	3-Hydroxy-7-methoxy-2-(4-methoxyphenyl)-4H-chromen-4-one	Flavonoids	Flavones	4745.37	201.84	5351.37	4065.79	92.8171	4067.63	17142.3	13614.3	13539.7	16800	12116.2	18353.6	1.30639	2.2972e-05	8.5966e-05	0.20742	-2.2693	down	0
NEG_4107	3-Hydroxy-N-(2-oxooxolan-3-yl)tetradecanamide	Carboxylic acids and derivatives	Amino acids, peptides, and analogues	6674.61	6382.07	6888.49	7427.74	7291.87	7334.45	40368.8	44753.4	37609.5	43654	38061.8	48956.3	1.38669	1.9477e-08	3.0095e-07	0.16429	-2.6057	down	0
NEG_556	3,4-Dihydrocoumarin	Coumarins and derivatives		3990.45	4100.24	4531.96	4985.46	4224.94	4315.58	44663.4	40725.8	38555.1	45089.9	36936.3	46056.2	1.39242	2.7259e-09	8.4239e-08	0.10508	-3.2504	down	C02274
NEG_4646	3'-Adenylic acid	Nucleosides, nucleotides, and analogues		3733.99	3027.81	3366.71	2924.05	3325	2809.65	9910.91	9856.18	10216.3	12094	10000.9	13584.4	1.36072	9.3042e-07	5.7137e-06	0.28679	-1.8019	down	C01367
NEG_5297	4-Hydroxy-5-[(2S,3R,4S,5S,6R)-3,4,5-trihydroxy-6-(hydroxymethyl)oxan-2-yl]oxy-1H-benzo[f][2]benzofuran-3-one	Organooxygen compounds	Carbohydrates and carbohydrate conjugates	272157	688626	258257	156977	418361	307281	364822	810623	1.1639e+06	1.12506e+06	1.65734e+06	3.11415e+06	1.03684	0.010171	0.020688	0.22251	-2.1681	down	0
NEG_518	4-Hydroxyquinoline	Organoheterocyclic compounds	Quinolones and derivatives	8565.9	7771.76	8679.84	8435.08	7212.79	8489.66	25466.2	25702.1	24733.3	30079.5	24055.1	30193.4	1.37705	9.4108e-08	8.7529e-07	0.30396	-1.7181	down	0
NEG_5076	4-O-Feruloylquinic acid	Organooxygen compounds	Alcohols and polyols	12205.7	10505.3	13896.7	9922.5	9325.67	11699.4	30993.2	30782.5	21554.2	33096	23070.4	33360	1.29404	5.5345e-05	0.00019072	0.39683	-1.3334	down	0
NEG_327	4-Vinylphenol	Benzenoids	Styrenes	1984.85	2295.79	1556.11	3036.84	2497.81	2385.75	9374.6	9832.1	8884.15	10585.7	9342	11790.7	1.37916	1.0096e-07	8.9366e-07	0.22731	-2.1373	down	C05627
NEG_4698	6,10a-Dihydroxy-4-(hydroxymethyl)-4,7,11b-trimethyl-1,2,3,4a,5,6,6a,7,11,11a-decahydronaphtho[2,1-f][1]benzofuran-9-one	Organoheterocyclic compounds		10682.6	9431.33	11276.7	12547.4	8794.11	10447.6	187079	18279.6	20553.2	32344.5	19576	16595.6	1.13468	0.0022626	0.005223	0.49045	-1.0278	down	0
NEG_2369	9-Hexadecenoic acid	Fatty Acyls	Fatty acids and conjugates	43881.7	52888.2	36379.3	46964.8	47260.9	50453.8	105560	9455.99	8920.04	24159.4	8157.94	8695.2	1.32437	8.2076e-06	3.6068e-05	3.8985	1.9629	up	0
NEG_4174	Adenosine 2',3'-cyclic phosphate	Nucleosides, nucleotides, and analogues	Cyclic purine nucleotides	3846.95	3008.2	4874.49	3532.48	2653.92	2676.93	13242.3	9848.24	9160.87	15093.2	9533.07	16037.7	1.25848	0.00018712	0.00055498	0.28758	-1.798	down	0
NEG_5592	Alfuzosin	Organoheterocyclic compounds	Benzodiazines	7917.06	7609.46	7223.03	7213.78	5259.07	6640.14	1732.79	1780.52	1285.91	2007.41	1419.02	2285.15	1.35959	1.1846e-06	7.0931e-06	3.9742	1.9907	up	0
NEG_4354	Altertoxin I	Benzenoids		9596.48	5940.44	7474.56	8944.04	5579.61	7339.51	8449.19	2694.95	2521.09	4122.18	2610.06	2874.85	1.26539	0.00022888	0.00065845	2.5228	1.335	up	0
NEG_2682	Arbutin	Others		4576.12	3997.35	4805.77	4195.01	3703.02	4406.44	12258.3	10247.7	9819.22	11839.5	10396.2	11997.3	1.37238	1.1322e-07	9.5391e-07	0.39416	-1.3431	down	0
NEG_4758	Chlorogenic acid	Organooxygen compounds	Alcohols and polyols	31176.6	28990	26471.8	27475.2	22568	28008.9	10638.8	13799.7	11041.6	14126.7	10889	12427.2	1.35169	2.4572e-06	1.3005e-05	2.2035	1.1398	up	C00852
NEG_1059	Coniferyl aldehyde	Phenols	Methoxyphenols	526.146	1815.37	1135.04	1237.54	1632.76	915.97	18429.7	16843.3	18409.8	19785.4	15699.6	20532.3	1.39172	7.7177e-09	1.4787e-07	0.066312	-3.9146	down	0
NEG_2493	Demethylbellidifolin	Organoheterocyclic compounds	1-benzopyrans	44180.3	28864.7	37404.6	34941.5	78212.3	45205.6	9012.26	5598	21146.8	6849.32	12220.5	12632.7	1.11285	0.0030654	0.0068137	3.8326	1.9383	up	0
NEG_11056	Diosmetin-7-O-rutinoside	Flavonoids	Flavonoid glycosides	40325.9	29906.7	38567.4	30980.1	29061.2	29958.2	13435.4	14161.7	12495.9	15539.3	13426.7	12879.4	1.33333	1.3799e-05	5.7477e-05	2.4184	1.274	up	C10039
NEG_1924	Dodecanedioic acid	Fatty Acyls	Fatty acids and conjugates	29054.9	24857.8	32316.8	28985.5	25198.7	26747.8	65656.1	60928	61529	66984.3	56331.3	73756.4	1.36217	7.2403e-07	4.6242e-06	0.43596	-1.1977	down	C02678
NEG_3876	FA 18:0;2O	Fatty Acyls	Fatty acids and conjugates	19125.7	23727	17751.4	20133.8	14454.8	17611.2	55806.9	40425.5	44265.6	44584.9	37182.2	42684.1	1.36669	6.0377e-07	3.9348e-06	0.44947	-1.1537	down	0
NEG_14001	Flavonol base + 4O, O-Hex-Hex, O-dHex	Flavonoids	Flavonoid glycosides	8759.93	10582.2	4126.67	4461.76	12958.7	7755.2	20854.2	19259.3	18123.3	16605.1	13802.4	19786.6	1.23257	0.00061904	0.0015772	0.46287	-1.1113	down	0
NEG_930	Gallic acid	Benzenoids	Benzoic acids and derivatives	36001.1	23982.9	34504.3	33326.4	23462.7	31752.7	10471.6	12913.6	10984.5	13479.4	10497.6	15522.1	1.29836	7.1406e-05	0.00023587	2.4059	1.2666	up	C01424
NEG_5746	gamma-Mangostin	Organoheterocyclic compounds	1-benzopyrans	1501.54	1124.73	1513.22	1560.87	778.574	817.678	23139.2	20025.6	16635.5	20478.4	16274.9	20115.4	1.38918	7.0299e-09	1.3744e-07	0.065012	-3.9432	down	0
NEG_2637	Genistein	Isoflavonoids	Isoflav-2-enes	18254.7	16628.4	18901	18559	16227.6	17441.5	8178.6	7899.19	6848.62	9273.67	6871.43	8612.39	1.37782	1.1351e-07	9.5391e-07	2.2362	1.1611	up	C06563
NEG_14230	Ginsenoside Rg2	Others		44010.2	37576.7	30232.5	46488.3	39652.6	44241.6	1549.64	14840.1	14166.9	32382.4	12841	18634.1	1.21258	0.00057553	0.0014757	2.1734	1.12	up	0
NEG_3036	Glycitein	Isoflavonoids	Isoflav-2-enes	8577.71	6725.73	10582.8	8024.28	6482.55	7830.69	26975.3	22270.8	20527.5	27707.9	18179.8	27266.1	1.32138	1.5837e-05	6.3851e-05	0.34658	-1.5287	down	C14536
NEG_5749	Hexose + C10H19O2	Organooxygen compounds	Carbohydrates and carbohydrate conjugates	4202.45	3452.06	6886.49	7894.18	5937.44	3697.75	30982.5	23152.1	23221.6	29456.1	21317.2	24901.5	1.3659	4.6638e-07	3.1464e-06	0.21897	-2.1912	down	0
NEG_1257	Hydron;2-hydroxypropane-1,2,3-tricarboxylate	Carboxylic acids and derivatives	Tricarboxylic acids and derivatives	5944.67	10636.7	9262.95	9015.78	10371.5	9088.03	8633.64	30434	33488.2	24810.7	24759.4	34684	1.35552	3.3001e-06	1.6816e-05	0.30549	-1.7108	down	0
NEG_412	Hydron;pentanedioate	Carboxylic acids and derivatives	Dicarboxylic acids and derivatives	21115.8	13675.4	23064.4	18450.3	17004.2	18153.3	50358.2	45665.2	48600.2	68263.7	46326.3	79286.9	1.26278	0.00016757	0.00050165	0.32236	-1.6332	down	0
NEG_8627	Hypericin	Benzenoids	Benzopyrenes	43768.3	38930.8	48444.7	50191.8	39660.1	45433.1	20516.1	15043	17281.3	22029.1	16434.9	22742.6	1.35104	2.7126e-06	1.4123e-05	2.3738	1.2472	up	0
NEG_2618	Inosine	Nucleosides, nucleotides, and analogues		11250.6	8998.06	12595.5	9425.37	8525.09	9976.26	33751.4	32505.8	30153.6	39498.7	29418.9	46636.8	1.32348	1.488e-05	6.0918e-05	0.28417	-1.8152	down	0
NEG_8963	Isochlorogenic acid A	Organooxygen compounds	Alcohols and polyols	35600.4	24135.5	31698	27219	20157.7	40278.9	13133.9	11320	13772.9	9889.96	7237.04	14208.5	1.22558	0.00055812	0.0014451	2.6448	1.4032	up	0
NEG_2392	Isoliquiritigenin	Linear 1,3-diarylpropanoids	Chalcones and dihydrochalcones	10356.5	6852.18	10845.7	9871.86	7982.88	7480.25	24562	19325.8	16985.2	23277.4	16885.3	23788.7	1.29449	4.8581e-05	0.00016862	0.44375	-1.1722	down	C08650
NEG_1221	Kynurenic acid	Organoheterocyclic compounds	Quinoline carboxylic acids	3725.39	3395.57	3837.27	3277.09	3351.93	3287.49	10689.7	10829.4	10697.2	11943.7	10319.3	12362.3	1.38912	5.9857e-09	1.2466e-07	0.3098	-1.6906	down	C01717
NEG_4880	Matairesinol	Others		3736.76	2895.95	4194.19	3060.68	2902.64	3683.92	2962.46	319.502	874.558	1967.32	804.075	1201.34	1.29504	7.1649e-05	0.00023587	3.3022	1.7234	up	0
NEG_11393	Narcissin	Flavonoids	Flavonoid glycosides	7099.32	4936.69	5711.39	5176.33	4544.76	5320.69	31641.7	29895.8	27989.9	32390.4	24321.2	35589.9	1.37385	2.2448e-07	1.6671e-06	0.18194	-2.4585	down	0
NEG_2950	Octyl gallate	Others		16373.7	13710.2	16512.3	15248.2	13630.3	14541.1	57107	46286.5	45983	54399.7	45644.6	58329.7	1.37336	1.5831e-07	1.233e-06	0.29928	-1.7404	down	0
NEG_559	p-Coumaraldehyde	Cinnamic acids and derivatives		7189.9	5745.7	7517.37	6192.18	5967.57	5824.07	45806.4	28547.7	29784.1	36601.3	28031	41466	1.35555	1.6126e-06	9.1959e-06	0.1948	-2.3599	down	0
NEG_575	p-Coumaryl alcohol	Cinnamic acids and derivatives		2276.96	2085.91	1790.14	2623.42	2185.39	2561.61	10972.5	9705.45	8630.04	7536.32	8081.51	7921.63	1.38086	4.4987e-08	5.1306e-07	0.26912	-1.8937	down	0
NEG_6485	Pentose-Hexose + C5H9	Fatty Acyls	Fatty acyl glycosides	1801.71	1460.9	2207.5	1756.84	1757.1	1986.07	13103.7	11302.6	11654.6	12953.4	10742.7	13788.2	1.38812	9.7748e-09	1.7668e-07	0.15125	-2.725	down	0
NEG_810	Phenylpyruvic acid	Benzenoids	Phenylpyruvic acid derivatives	17651.3	15853.8	17541.2	16568.8	15197.1	15371.4	43338.4	38463.3	37847.8	43610.4	37352.9	46158	1.37414	1.4418e-07	1.1607e-06	0.4022	-1.314	down	C00166
NEG_15143	PI 36:5	Others		17861.4	22822.7	16390.9	17170.6	16088.2	15931.9	1046.79	8458.39	8693.27	6591.1	8187.59	7939.81	1.30491	2.2962e-05	8.5966e-05	2.2211	1.1513	up	0
NEG_9093	Pinoresinol 4-O-glucoside	Others		58179.7	57732.1	50050.9	55771.6	55942.4	46338.1	8493.15	28317.1	27690.4	26782.8	14942.8	23484	1.32833	4.9114e-06	2.3884e-05	2.2275	1.1554	up	0
NEG_3787	Porphyrillic acid	Organoheterocyclic compounds	Dibenzofurans	15140.4	8782.03	18816.3	10789.9	6820.4	9551.7	4087.01	2603.84	3734.11	2141.49	589.03	4426.07	1.15832	0.0021533	0.0049948	4.3166	2.1099	up	0
NEG_10464	Procyanidin B1	Flavonoids	Biflavonoids and polyflavonoids	1112.55	1694.16	690.496	2004	1957.74	1207.29	40062.2	35273.8	37539.9	40016.8	38783.7	37663.3	1.39837	3.2401e-12	1.0347e-09	0.038155	-4.712	down	C10221
NEG_5790	Propoxycarbazone	Benzenoids	Benzoic acids and derivatives	1668.7	1951.85	2266.99	1491.45	1907.05	2355.57	32385.3	27480.2	34758.3	28867.2	31806.5	28874.9	1.38943	1.8819e-09	6.4387e-08	0.063914	-3.9677	down	0
NEG_8698	Protohypericin	Others		12155	10296.9	6761.9	4221.99	8204.57	9154.15	21474.3	18141.5	19979.7	27877.1	18360.1	21788.8	1.2649	0.00014901	0.00045317	0.39877	-1.3264	down	0
NEG_2940	Pseudobaptigenin	Isoflavonoids	Isoflav-2-enes	10324.1	8764.61	10087.2	9981.09	8319.73	9988.18	42355.2	22985.1	21631.9	24210.8	20459.5	24054.1	1.38155	2.9466e-08	3.8349e-07	0.42251	-1.243	down	C10522
NEG_5169	Stenophylline A	Organooxygen compounds	Carbohydrates and carbohydrate conjugates	10853.6	9413.91	10660.5	10719.4	7645.42	9805.95	24857.1	20442.2	18776.5	23322.7	20237.8	22445.6	1.35624	6.8472e-07	4.4322e-06	0.46804	-1.0953	down	C05158
NEG_6044	Tinnevellin glucoside	Others		9697.18	7068.17	10411.6	9127.37	6886.96	8113.6	2537.29	1689.18	1781.94	2745.8	1722.92	3079.44	1.34047	7.9645e-06	3.5654e-05	3.8799	1.956	up	0
NEG_996	trans-Aconitic acid	Carboxylic acids and derivatives	Tricarboxylic acids and derivatives	9320.01	6948.18	10124.6	9761.37	7046.23	7641.04	18982.5	28074.5	28725	35559.7	21635.9	37071.6	1.3251	1.5605e-05	6.3346e-05	0.28046	-1.8341	down	C02341
NEG_907	Vanillic acid	Benzenoids	Benzoic acids and derivatives	5333.3	5085.64	3466.68	5080.89	5096.73	5424.83	11229.7	13897.6	12251.2	14911.8	13759.7	10050.6	1.33494	4.5758e-06	2.2366e-05	0.3788	-1.4005	down	C06672
NEG_11401	Verbascoside	Others		16845.1	17088.2	15334.6	16200.6	16256.8	16867.2	45686.8	49060.5	45711.6	42905.1	51288.5	42601.1	1.38086	1.3684e-08	2.2602e-07	0.3548	-1.4949	down	0

## Sheet: AS VS MS
ID	Name	Class	Subclass	AS-1	AS-2	AS-3	AS-4	AS-5	AS-6	MS-1	MS-2	MS-3	MS-4	MS-5	MS-6	VIP	P_value	FDR	Fold Change	log2(FC)	Type	KEGG
POS_1912	N-(2-Oxooxolan-3-yl)octanamide	Carboxylic acids and derivatives	Amino acids, peptides, and analogues	76278.4	66677.4	81635	70320.5	65523.5	65239.9	211763	219699	197974	193701	182479	227675	1.24611	6.0672e-09	4.3702e-08	0.34515	-1.5347	down	0
POS_5327	Syringin	Organooxygen compounds	Carbohydrates and carbohydrate conjugates	42669.9	38207.1	43094.7	39858.2	38148.7	37731.7	333853	360879	294415	308966	287328	375182	1.25188	2.7794e-09	2.4884e-08	0.12226	-3.032	down	0
POS_6346	1-Dodecanoyl-sn-glycero-3-phosphocholine	Glycerophospholipids	Glycerophosphocholines	74457.1	62850	79117.8	63029.6	61341.6	66070.7	310513	326985	293043	270417	267245	331293	1.25008	2.2474e-09	2.1108e-08	0.2261	-2.145	down	0
POS_3418	2,4-Dihydroxyheptadecyl acetate	Fatty Acyls	Fatty alcohols	50126.7	43143.1	69760.3	111115	69690.3	38551	401546	461364	339353	349023	307238	489735	1.2149	1.1152e-06	3.6216e-06	0.16284	-2.6185	down	0
POS_5412	[1,3-Dihydroxy-1-(7-methoxy-2-oxochromen-6-yl)-3-methylbutan-2-yl] (E)-2-methylbut-2-enoate	Coumarins and derivatives		2008.76	2801.07	3420.6	3575.54	1681.51	1365.68	139941	88711.6	148506	144260	68627.5	121101	1.19252	5.9497e-06	1.6379e-05	0.020886	-5.5813	down	0
POS_3037	Norcimifugin	Others		62036.7	48932.7	65408.1	57335.5	55349.3	58517.8	7264.94	7992.97	6932.61	5894.44	6470.71	8228.53	1.26045	9.8451e-10	1.1096e-08	8.124	3.0222	up	0
POS_1333	3-n-Butylphathlide	Others		2419.5	2536.3	4022.02	3210.44	916.507	3280.16	54902	57812.1	49753.5	47341.9	44820.8	59407.5	1.25215	1.9132e-09	1.9293e-08	0.052175	-4.2605	down	0
POS_6356	Ginkgolide C	Others		462.074	386.908	585.461	1101.97	1028.57	1172.32	212187	227050	185022	199267	184475	228258	1.25893	1.8877e-10	3.2881e-09	0.003832	-8.0277	down	0
POS_6223	Mundulone	Isoflavonoids	Isoflavans	4553.3	3789.63	5562.08	6200.61	4493.43	5316.96	86313.1	84698.9	89277.9	90692.4	80449	98632.8	1.26198	1.7223e-11	6.7623e-10	0.056438	-4.1472	down	0
POS_6964	Sucrose 6-benzoate	Organooxygen compounds	Carbohydrates and carbohydrate conjugates	4063.46	3801.38	5366.06	3782.48	3822.46	4858.42	740393	799440	556001	569480	477626	876687	1.21476	1.1781e-06	3.7804e-06	0.0063922	-7.2895	down	0
POS_8705	(2R,3E)-4-[(1S,6R)-1-Hydroxy-2,2,6-trimethyl-4-oxocyclohexyl]-3-buten-2-yl 6-O-beta-D-xylopyranosyl-beta-D-glucopyranoside	Fatty Acyls	Fatty acyl glycosides	133270	109063	134887	124714	115772	121325	898186	943665	842346	764751	731103	934835	1.25136	2.2328e-09	2.1108e-08	0.14449	-2.791	down	0
POS_7328	(1R,2S,4R,5R)-5-Hydroxy-1,7,7-trimethylbicyclo[2.2.1]hept-2-yl 6-O-[(2R,3R,4R)-tetrahydro-3,4-dihydroxy-4-(hydroxymethyl)-2-furanyl]-beta-D-glucopyranoside	Prenol lipids	Terpene glycosides	11160.2	11869.5	24081.6	19887.8	11979.6	11530.6	1.00584e+06	1.06656e+06	1.08674e+06	981626	925128	1.07711e+06	1.26283	3.3559e-12	2.0093e-10	0.014734	-6.0847	down	0
POS_2614	2-(6-Aminopurin-9-yl)-5-(hydroxymethyl)oxolane-3,4-diol	Nucleosides, nucleotides, and analogues		95987.8	63914.4	111457	80358.3	64378.4	74606.3	352139	355470	290895	262610	208066	360963	1.18393	7.4428e-06	2.0199e-05	0.26812	-1.899	down	0
POS_5250	4-(1,3-Benzodioxol-5-ylmethyl)-3-[(3,4-dimethoxyphenyl)methyl]oxolan-2-one	Lignans, neolignans and related compounds	Tetrahydrofuran lignans	15818.4	12320.2	17988.3	14561.6	11975.8	15086.8	186178	177833	196567	177392	137886	209996	1.24565	1.3246e-08	8.1343e-08	0.080813	-3.6293	down	0
POS_6910	5-[(1R,3S,5R,8S)-3-(beta-D-glucopyranosyloxy)-8-hydroxy-1,5-dimethyl-6-oxabicyclo[3.2.1]oct-8-yl]-3-methyl-, (2Z,4E)-2,4-pentadienoic acid	Prenol lipids	Sesquiterpenoids	64631	56108.9	68150.8	60994.5	54374.7	59428.7	167907	179478	149600	150820	139910	180587	1.23398	7.4148e-08	3.2584e-07	0.37559	-1.4128	down	0
POS_9002	Arctiin	Lignans, neolignans and related compounds		10020.3	9729.98	10011.8	10620.2	9360.85	10820.4	91296.6	97085.3	85032.6	83964.1	77350.3	102779	1.25415	1.4395e-09	1.499e-08	0.11267	-3.1498	down	0
POS_6354	Barbaloin	Benzenoids		8345.05	7554.53	8370.51	8097.4	7747.49	7954.3	224507	223522	220297	217448	210615	225459	1.26631	5.1934e-16	4.9753e-13	0.036365	-4.7813	down	0
POS_8338	Chaetoglobosin C	Alkaloids and derivatives	Chaetoglobosins	7244.28	4960.32	7619.23	3932.82	2163.42	4716.16	84708.5	88756.7	77565.4	75830.3	69683.8	80419.7	1.25657	1.7219e-10	3.1124e-09	0.064232	-3.9606	down	0
POS_6325	Phenethyl 2-O-(beta-D-xylopyranosyl)-beta-D-glucopyranoside	Organooxygen compounds	Carbohydrates and carbohydrate conjugates	426075	382868	464476	394021	384751	393259	934218	955614	883138	877237	837564	952036	1.25017	1.1721e-09	1.2476e-08	0.44955	-1.1535	down	0
POS_5415	S-Adenosylmethionine	Nucleosides, nucleotides, and analogues	5'-deoxy-5'-thionucleosides	97786.6	98270	138112	89730.6	91634	83513	347447	211591	360953	402820	314391	374437	1.18089	9.17e-06	2.4402e-05	0.29779	-1.7476	down	0
POS_6207	Sayaendoside	Organooxygen compounds	Carbohydrates and carbohydrate conjugates	35273.8	30525.3	40451.3	30938.9	29555.5	33770.1	170326	177611	160161	153430	137453	190260	1.24528	1.1322e-08	7.2088e-08	0.2027	-2.3026	down	0
POS_6700	Vindoline	Others		14327.8	14640.6	14305	14278.4	13458.8	12450.3	121581	120961	112591	94299.7	93111.7	129582	1.24316	2.1042e-08	1.1519e-07	0.12417	-3.0096	down	0
POS_4260	5-(5-Methoxycarbonyl-5,8a-dimethyl-2-methylidene-3,4,4a,6,7,8-hexahydro-1H-naphthalen-1-yl)-3-methylpentanoic acid	Prenol lipids	Diterpenoids	67711.8	53910.1	67465.6	53106.9	53103.3	49686.6	400074	394312	355182	350923	312993	422097	1.24983	3.6852e-09	2.9177e-08	0.15432	-2.696	down	0
POS_6854	4-[3-Methyl-5-(5,6,7-trihydroxy-1,2,4a,5-tetramethyl-3,4,6,7,8,8a-hexahydro-2H-naphthalen-1-yl)pentoxy]-4-oxobutanoic acid	Prenol lipids	Diterpenoids	45495.2	37811.1	51142.7	20757.8	38631.5	39863.1	158268	171054	137240	135139	140036	161081	1.23754	3.3228e-08	1.6324e-07	0.25886	-1.9498	down	0
POS_7916	1-Heptadecanoyl-sn-glycero-3-phosphocholine	Glycerophospholipids	Glycerophosphocholines	80619.5	42051.3	66269	58007.5	53485.8	63849.3	176808	177330	177970	160055	148505	208435	1.2177	4.0222e-07	1.4271e-06	0.34723	-1.526	down	C04230
POS_5455	6-formyl-5-hydroxy-10-(hydroxymethyl)-3-methylidene-2-oxo-2H,3H,3aH,4H,5H,8H,9H,11aH-cyclodeca[b]furan-4-yl 2-methylbutanoate	Others		17489.8	14715.2	15477	15602.9	16279.7	15247.8	59977.6	64144.8	52495.7	53527.4	51968.6	63620.8	1.24846	6.3376e-09	4.5309e-08	0.27423	-1.8665	down	0
POS_8697	Satratoxin F	Prenol lipids	Sesquiterpenoids	3444.43	3205.45	4289.03	4511.92	3649.15	3206.47	38220.9	37770.9	39218.4	35492.4	36638.3	38856	1.264	9.6845e-14	2.1918e-11	0.098615	-3.342	down	0
POS_894	6-methoxyquinoline	Others		119054	51674	134003	115807	105059	112747	38433.9	37123.2	31949.4	32564.7	28425.5	38000.5	1.14257	0.00011051	0.00024226	3.0913	1.6282	up	0
POS_6510	Luteolin-4'-o-glucoside	Flavonoids	Flavonoid glycosides	161593	66973.1	236536	159018	134931	139482	1580.53	2421.75	1571.43	1480	1407.4	2576.03	1.16249	5.8606e-05	0.00013432	81.41	6.3471	up	0
POS_3983	(3R,5R)-1,3,5-trihydroxy-4-[(E)-3-(4-hydroxyphenyl)acryloyl]oxy-cyclohexanecarboxylic acid	Organooxygen compounds	Alcohols and polyols	4005.18	3429.66	2738.45	2348.58	695.445	3089.49	9571.41	6156.14	13413.3	5599.06	12540.3	16557.8	1.01645	0.0014443	0.0025911	0.25544	-1.9689	down	0
POS_8210	Haploperoside C	Coumarins and derivatives	Coumarin glycosides	16513.5	9732.15	15580.2	13233.4	8437.81	11297.6	33437.6	31890.4	24562.1	27224.1	19109.7	37700.3	1.08999	0.00028261	0.00056878	0.43004	-1.2175	down	0
POS_3238	Methyltestosterone	Steroids and steroid derivatives	Androstane steroids	213575	192704	187402	183777	207001	182595	501549	427967	423356	470282	324907	473424	1.20429	2.9989e-06	8.7857e-06	0.44519	-1.1675	down	C07198
POS_974	1-Deoxynojirimycin	Others		10894.8	11827.3	10543.5	10203.8	10068.5	17898.8	73348.5	96858.4	63216.3	114313	129063	75577	1.16787	1.96e-05	4.9027e-05	0.12933	-2.9509	down	0
POS_3096	Methyl linoleate	Others		26696.2	23989	52495.5	27588.5	20695	20838.9	945206	1.02372e+06	853413	801408	707552	1.06437e+06	1.24285	2.4701e-08	1.2722e-07	0.031934	-4.9688	down	0
POS_5732	1-[4-[2-(7-Methoxy-1,3-benzodioxol-5-yl)ethyl]phenoxy]-3-methylbutane-2,3-diol	Stilbenes		14868.9	14628.8	11938.9	12031.3	15247.2	13231.2	37531.5	49417.5	39449.1	34440.5	43503.3	42536.4	1.22783	2.152e-07	8.2684e-07	0.33193	-1.591	down	0
POS_4092	2-[(2'R,8R,8aS)-2',4,4,7,8a-Pentamethylspiro[2,3,4a,5-tetrahydro-1H-naphthalene-8,5'-oxolane]-2'-yl]acetic acid	Prenol lipids	Diterpenoids	7376.79	7981.27	5704.86	4154.74	7736.67	4630.37	45214.8	46876.5	44338.6	41807.5	38050.2	45638.8	1.25874	2.1825e-10	3.6049e-09	0.14349	-2.8009	down	0
POS_6664	5‐(1‐benzofuran‐2‐yl)‐N,N‐dimethyl‐2‐[4‐(piperazin‐1‐yl)phenyl]‐1,3‐thiazole‐4‐carboxamide	Organoheterocyclic compounds	Piperazines	730.183	558.13	1392.72	520.652	1167.6	562.038	9556.19	9062.31	7424.37	8644.17	6898.57	10208.6	1.24002	4.7491e-08	2.2193e-07	0.09521	-3.3927	down	0
POS_6462	HT-2 Toxin	Prenol lipids	Sesquiterpenoids	19740.5	5983.99	23449.9	11794.2	7704.76	8728.24	34548.9	38749.3	31783.1	29056.6	24660.1	37964.3	1.07753	0.00027617	0.00055699	0.39338	-1.346	down	0
POS_5109	Methyl 2-hydroxy-6-(4-hydroxy-2-methoxy-6-methoxycarbonylphenoxy)-4-methylbenzoate	Benzenoids	Diphenylethers	18755.3	11283.9	18229	14872.6	13475.3	15733.9	46064.9	45610.2	40998.1	37052.5	33065.5	47402.6	1.20438	1.4599e-06	4.6006e-06	0.36911	-1.4379	down	0
POS_10392	(1beta,3beta,9xi,11alpha,14xi)-1,3,11-Trihydroxyfurosta-5,20(22),25-trien-27-yl beta-D-glucopyranoside	Steroids and steroid derivatives	Steroidal glycosides	257800	204599	283531	241009	218523	223664	14235.1	14140	11855.6	12445.9	11913.6	14651.8	1.2583	3.4447e-09	2.9177e-08	18.035	4.1727	up	0
POS_1222	12-Hydroxydodecanoic acid	Hydroxy acids and derivatives	Medium-chain hydroxy acids and derivatives	49661.4	45296.7	57290	50569.8	46546.8	44009.3	115636	124048	102978	98654.5	93506.8	107561	1.21931	3.8986e-07	1.3936e-06	0.4567	-1.1307	down	C08317
POS_4238	2',5,6-Trimethoxyflavone	Flavonoids	O-methylated flavonoids	389797	423704	625651	450925	435165	360849	192821	228750	247033	283275	105882	182443	1.09534	0.00035196	0.00069954	2.1658	1.1149	up	0
POS_3298	5,7-Dimethoxyflavanone	Flavonoids	O-methylated flavonoids	59372.2	51969.4	126706	58503.3	60603.4	42376.2	249208	279911	291347	247397	177819	236935	1.18715	4.8609e-06	1.3576e-05	0.26948	-1.8918	down	0
POS_2511	8-Hydroxy-9,10-epoxystearic acid	Fatty Acyls	Lineolic acids and derivatives	258917	165816	257241	245188	196873	214151	105727	54325.1	93202.6	81964.2	38178.5	60990.7	1.19509	1.0005e-05	2.6404e-05	3.0806	1.6232	up	0
POS_4087	beta-Lactose	Organooxygen compounds	Carbohydrates and carbohydrate conjugates	21885.8	28025.4	84785.5	26937.4	26331.7	28250.7	134722	144729	136981	94071.9	74256.6	96238.7	1.06298	0.00050241	0.00098226	0.3175	-1.6552	down	C01970
POS_6961	Monotropitoside	Organooxygen compounds	Carbohydrates and carbohydrate conjugates	24715.6	20630.8	26968.6	25558.7	21613.2	23521.4	124023	129445	110708	105721	101432	125232	1.24937	3.4856e-09	2.9177e-08	0.20531	-2.2842	down	0
POS_821	Nerol	Prenol lipids	Monoterpenoids	106296	112409	130257	112000	95667.2	103693	312162	318834	254161	283618	214613	294479	1.21046	1.3952e-06	4.4113e-06	0.39355	-1.3454	down	C09871
POS_4512	Palatinose	Organooxygen compounds	Carbohydrates and carbohydrate conjugates	975849	848278	1.96514e+06	898427	984960	774258	3.9907e+06	3.82515e+06	4.17075e+06	3.93641e+06	2.90535e+06	3.71401e+06	1.20715	1.0508e-06	3.4476e-06	0.28599	-1.806	down	0
POS_5756	Stigmasterol	Steroids and steroid derivatives	Stigmastanes and derivatives	87056.6	85819.4	90692.2	86610.3	77990.7	96483	524254	493766	463144	471527	595475	582976	1.24786	4.0437e-09	3.1241e-08	0.16756	-2.5773	down	0
POS_7827	Verrucarin J	Prenol lipids	Sesquiterpenoids	56446.9	40307.7	69410.5	55998.6	46923.3	38911.7	2361.2	2118.25	1607.44	1866.33	2173.69	1414.77	1.2259	1.0603e-06	3.4667e-06	26.686	4.738	up	0
POS_3045	9s,13r-12-Oxophytodienoic Acid	Fatty Acyls	Eicosanoids	87029.8	78921.1	93089	83665.5	77623.9	80307.1	280311	142107	184164	181211	179008	297684	1.06775	0.00058083	0.0011151	0.39592	-1.3367	down	0
POS_8900	Echinenone	Prenol lipids	Tetraterpenoids	218683	260590	224787	239362	243435	228280	71876.4	77242.3	75616	68639.3	62077.4	73411.7	1.25093	2.4923e-10	3.9142e-09	3.2997	1.7224	up	C08592
POS_375	Nicotinamide	Organoheterocyclic compounds	Pyridinecarboxylic acids and derivatives	23538.2	23827.3	53874.6	19011.8	19062.1	21268.3	57051.7	69784.5	88041.7	89438.2	103887	81106.1	1.12033	8.5437e-05	0.00019213	0.32818	-1.6074	down	C00153
POS_2954	Dihydro-3-methylene-4-[(2E)-3-methyl-4-(tetrahydro-4-methyl-5-oxo-2-furanyl)-2-buten-1-yl]-, (4R)-2(3H)-furanone,	Prenol lipids	Terpene lactones	105214	43827.2	78425.3	70569.9	46454	97529	29634.6	29740.6	27740.8	26590.3	23611.9	28877.3	1.05264	0.0013077	0.0023629	2.6596	1.4112	up	0
POS_3157	Nephrosteranic acid	Organoheterocyclic compounds	Gamma butyrolactones	37397	31597	40413.3	31465.6	30152	28603.9	77812.7	78962.2	75321.8	64576.5	64274.2	70876.9	1.21704	3.0534e-07	1.1294e-06	0.46229	-1.1131	down	0
POS_4058	Poldine	Benzenoids	Diphenylmethanes	7629.84	7833.41	10948.3	10675.1	9133.14	6029.66	55673.5	56219	48843.5	44293	45905	49094	1.24879	3.3985e-09	2.907e-08	0.17415	-2.5216	down	0
POS_8101	[(2R,3S,4S,5R,6S)-3,4,5-Trihydroxy-6-[(2S,3R,4S,5S,6R)-3,4,5-trihydroxy-6-(hydroxymethyl)oxan-2-yl]oxyoxan-2-yl]methyl 8-methylnonanoate	Saccharolipids		6662.64	5932.33	7087	9449.05	5778.59	6719.54	29091.2	27115	24507.8	22541.5	15992.7	27345.2	1.1928	5.5456e-06	1.5355e-05	0.28398	-1.8162	down	0
POS_12028	gamma-Aminobutyrate	Carboxylic acids and derivatives	Amino acids, peptides, and analogues	22589.4	12704.5	18597	17507.5	11067.7	15908.9	49522.6	45299.9	34958	35059.3	29484.4	53039.7	1.11241	0.000146	0.00030944	0.39769	-1.3303	down	0
POS_4314	(2,6,6-Trimethyl-4-oxo-2-cyclohexen-1-yl)methyl beta-D-glucopyranoside	Organooxygen compounds	Carbohydrates and carbohydrate conjugates	14369.8	9730.46	13321.2	8712.45	10456	13211.4	2341.34	1741.98	1431.28	2122.26	891.607	4001.08	1.20781	3.291e-06	9.583e-06	5.5709	2.4779	up	0
POS_12389	(2S,3R,4S,5S,6R)-2-[4-[(3S,3aR,6S,6aR)-6-[3,5-Dimethoxy-4-[(2S,3R,4S,5S,6R)-3,4,5-trihydroxy-6-(hydroxymethyl)oxan-2-yl]oxyphenyl]-1,3,3a,4,6,6a-hexahydrofuro[3,4-c]furan-3-yl]-2,6-dimethoxyphenoxy]-6-(hydroxymethyl)oxane-3,4,5-triol	Lignans, neolignans and related compounds		7158.13	6535.58	7344.28	6013.3	6145.9	6066.01	14038.9	15560.9	12905.2	13799.3	14304.1	14697.8	1.24335	7.1763e-09	4.946e-08	0.46026	-1.1195	down	0
POS_4982	(E)-1,4-Bis(4-hydroxy-3-methoxyphenyl)-2,3-dimethylbut-2-ene-1,4-dione	Others		552.902	698.228	518.267	488.765	431.799	510.315	31152.7	28343	33789.5	36991.4	34489.2	27880.2	1.25257	1.1099e-09	1.2057e-08	0.016612	-5.9116	down	0
POS_5857	(E)-3-(4-Methoxyphenyl)-1-[2,4,6-trimethoxy-3-(3-methylbut-2-enyl)phenyl]prop-2-en-1-one	Linear 1,3-diarylpropanoids	Chalcones and dihydrochalcones	8163.08	6474.82	9179.09	8469.33	6918.21	7572.27	3848.48	3881.77	2748.68	3703.87	4259.39	4709.8	1.1925	1.1365e-05	2.9587e-05	2.0204	1.0147	up	0
POS_3669	(E)-4-[(1R,2S,3S,4R,8As)-2,3,4-trihydroxy-2,5,5,8a-tetramethyl-3,4,4a,6,7,8-hexahydro-1H-naphthalen-1-yl]but-3-en-2-one	Prenol lipids	Sesquiterpenoids	11238.8	8323.46	12214.8	10406.9	10179.3	10737.7	20786.7	25909.4	20837.1	19937.8	19376.4	20404.2	1.1985	2.0932e-06	6.3457e-06	0.49587	-1.012	down	0
POS_6966	[8-[2-(3-Methylbutanoyloxy)propan-2-yl]-2-oxo-8,9-dihydrofuro[2,3-h]chromen-9-yl] 3-methylbutanoate	Coumarins and derivatives	Furanocoumarins	1150.94	2008.94	2038.16	2725.5	868.523	2384.8	33644.3	34700.2	34993.8	35354.4	35238.1	32589.1	1.26469	3.2555e-14	1.0396e-11	0.05412	-4.2077	down	0
POS_3121	1,2-Didehydrotanshinone IIA	Prenol lipids	Diterpenoids	19563.7	15551.7	23727.1	19519.4	16077.6	17150.7	5241.44	4025.5	3742.04	3306.99	3746.75	4190.62	1.23462	4.3257e-07	1.5235e-06	4.601	2.202	up	0
POS_4396	2-(Hydroxymethyl)-6-(6-hydroxy-6-methyl-3-propan-2-ylcyclohex-3-en-1-yl)oxyoxane-3,4,5-triol	Prenol lipids	Terpene glycosides	4600.16	2532.12	5518.18	5445.93	9471.35	2270.85	35851.1	36712.2	22295.7	20122.3	25036.9	36357.4	1.16566	2.5174e-05	6.168e-05	0.16918	-2.5634	down	0
POS_8732	2-(Hydroxymethyl)-6-[5-[3-(hydroxymethyl)-5-(3-hydroxypropyl)-7-methoxy-2,3-dihydro-1-benzofuran-2-yl]-2-methoxyphenoxy]oxane-3,4,5-triol	Flavonoids		3115.68	579.174	2009.18	1188.68	1424.93	413.077	11288.3	11690.9	10219.8	11643.9	10027.1	10528.9	1.24457	4.212e-09	3.2281e-08	0.1335	-2.9051	down	0
POS_9072	2-[4-[4-[Hydroxy-(4-hydroxy-3-methoxyphenyl)methyl]-3-(hydroxymethyl)oxolan-2-yl]-2-methoxyphenoxy]-6-(hydroxymethyl)oxane-3,4,5-triol	Lignans, neolignans and related compounds		3066.04	3517.03	2297.42	3332.41	2653.33	2588.31	29286.3	30760.4	25972.1	27993	24346.2	30423.9	1.2582	3.8589e-10	5.2068e-09	0.10341	-3.2735	down	0
POS_6561	2-Phenylethyl 3-O-(4-carboxy-3-hydroxy-3-methylbutanoyl)-beta-D-glucopyranoside	Saccharolipids		2380.3	1603.81	2903.39	2388.64	1920.18	2190.95	3197.35	8832.99	7547.44	7194.58	7105.73	7144.16	1.10673	0.00017669	0.00036719	0.32634	-1.6155	down	0
POS_4310	3-(4-Hydroxyphenyl)propanoic acid 3-(4-hydroxy-3-methoxyphenyl)propyl ester	Phenols	Methoxyphenols	240.027	200.564	211.321	126.286	194.816	526.726	7869.44	8764.06	6605.64	6068.62	6690.15	8799.33	1.24047	3.6842e-08	1.7916e-07	0.033478	-4.9006	down	0
POS_5684	3-O-Methylfunicone	Organooxygen compounds	Carbonyl compounds	3444.47	3466.02	2742.87	2799.37	2765.23	3263.97	43209.1	46259.2	40658.5	45017.9	44053.7	46168.3	1.26477	4.5215e-13	4.8129e-11	0.069647	-3.8438	down	0
POS_1194	4-Hydroxy-3-methoxycinnamaldehyde	Phenols	Methoxyphenols	3686.42	3776.91	4553.26	4850.57	4158.11	4171.05	27181.9	25900	20744.3	24673.8	22437.2	29469.3	1.24515	1.9247e-08	1.0847e-07	0.16752	-2.5776	down	C02666
POS_6732	5-Hydroxy-7-[4-hydroxy-2-methoxy-3-(3-methylbut-2-enyl)phenyl]-2,2-dimethyl-7,8-dihydropyrano[3,2-g]chromen-6-one	Isoflavonoids	Isoflavans	15930.2	12489.2	16717.7	13112.6	13680.2	13287.5	5392	6248.53	4979.15	5808.17	5065.22	6976.11	1.22901	6.1777e-07	2.1521e-06	2.4723	1.3058	up	0
POS_9695	5-Methoxy-3-methyl-4-[(2S,3R,4S,5S,6R)-3,4,5-trihydroxy-6-[[(2R,3R,4S,5S,6R)-3,4,5-trihydroxy-6-(hydroxymethyl)oxan-2-yl]oxymethyl]oxan-2-yl]oxy-3H-benzo[f][2]benzofuran-1-one	Organooxygen compounds	Carbohydrates and carbohydrate conjugates	2598.8	2820.78	3105.38	2871.75	2675.66	2351.94	6674.46	6703.41	5868.96	5857.14	5158.16	6552.33	1.22888	2.01e-07	7.8917e-07	0.44614	-1.1644	down	0
POS_7497	6-[2-Hydroxy-3-methyl-3-[(2S,3R,4S,5S,6R)-3,4,5-trihydroxy-6-(hydroxymethyl)oxan-2-yl]oxybutyl]-5,7-dimethoxychromen-2-one	Fatty Acyls	Fatty acyl glycosides	5000.02	3944.88	4766.9	4561.04	4127.67	4825.64	13201.1	13943	13947.1	13485.6	12117.9	12121.1	1.2519	6.6929e-10	8.2202e-09	0.34544	-1.5335	down	0
POS_10854	9-Methoxy-7-[4-[3,4,5-trihydroxy-6-[[3,4,5-trihydroxy-6-(hydroxymethyl)oxan-2-yl]oxymethyl]oxan-2-yl]oxyphenyl]-[1,3]dioxolo[4,5-g]chromen-8-one	Isoflavonoids	Isoflavonoid O-glycosides	14525.1	10278.8	15275.3	13569.9	11840.7	12751.9	460.662	365.088	347.95	393.586	289.447	387.814	1.25482	1.0415e-08	6.7418e-08	34.859	5.1234	up	0
POS_3914	Acebutolol	Organooxygen compounds	Carbonyl compounds	5621.33	3335.34	2083.27	4131.17	3661.74	2872.27	16468.4	15851	10990.3	15713.1	13673.6	21503.4	1.18277	1.1344e-05	2.9587e-05	0.23042	-2.1177	down	0
POS_5416	Ailanthone	Prenol lipids	Terpene lactones	1894.83	2024.42	2591.14	1970.74	2496.89	1804.3	12454.4	13798	11547.1	11157.4	11057.6	12340.8	1.25491	7.0014e-10	8.4795e-09	0.17666	-2.5009	down	0
POS_5324	Alantrypinone	Organoheterocyclic compounds		78.8398	24.7194	149.383	125.23	32.6946	52.1977	20056.7	20435.4	18203.5	15872.9	15632.3	19316.2	1.25361	1.1201e-09	1.2057e-08	0.0042282	-7.8857	down	0
POS_9730	Alkergot	Alkaloids and derivatives	Lysergic acids and derivatives	5043.35	11374.3	13600.8	11728.8	11050.9	7174.29	992.123	1207.37	1024.81	1099.63	819.473	1261.29	1.14443	4.7077e-05	0.00010973	9.3638	3.2271	up	0
POS_9631	Benzyl 2-O-(D-apio-beta-D-furanosyl)-3-O-(beta-D-glucopyranosyl)-beta-D-glucopyranoside	Organooxygen compounds	Carbohydrates and carbohydrate conjugates	3566.65	2770.76	3445.67	3594.82	563.644	3152.64	19067.4	19489.2	13992.8	18591.4	10975.8	20128.7	1.19675	4.2054e-06	1.2003e-05	0.16719	-2.5805	down	0
POS_3507	Cafestol	Organoheterocyclic compounds		10854.9	13556	17754.4	16231.9	13932	13462.6	37873.3	33985.5	32512	32650.3	25637.7	33997.2	1.20623	2.1039e-06	6.358e-06	0.43625	-1.1968	down	0
POS_13467	Chlorophyll b from Chlorella	Organoheterocyclic compounds	Chlorins	1109	1569.08	1885.42	784.859	303.614	500.758	19238.1	15944.8	20267.8	24760.5	21290.3	14516.3	1.22252	3.102e-07	1.143e-06	0.053033	-4.237	down	0
POS_490	Cinnamaldehyde	Cinnamic acids and derivatives		8681.65	7949.99	8982.44	8561.5	8305.19	9143.13	38658.2	40496	34156.3	34384.7	31651.3	39653.4	1.25068	3.6322e-09	2.9177e-08	0.23573	-2.0848	down	C00903
POS_7125	Cirsimarin	Flavonoids	Flavonoid glycosides	10146.5	10185.7	11244.8	10317.5	9462.56	9264.94	852.482	961.627	603.962	663.297	525.421	636.673	1.26413	2.1744e-11	7.5997e-10	14.286	3.8365	up	0
POS_7374	Cytidine 5'-diphosphocholine	Nucleosides, nucleotides, and analogues	Pyrimidine ribonucleotides	4042.3	3721.75	4523.98	4563.7	2734.76	4645.14	11847	15779.1	10074.3	10538.3	11552.9	14395.4	1.18797	6.0716e-06	1.6666e-05	0.32663	-1.6143	down	0
POS_9764	Ergocristam	Alkaloids and derivatives	Lysergic acids and derivatives	9517.89	7042.48	9951.82	5162.02	9017.34	7403.15	837.238	1338.65	1166	759.525	1047.78	1660.72	1.20558	3.628e-06	1.05e-05	7.0625	2.8202	up	0
POS_5691	gamma-Tocotrienol	Prenol lipids	Quinone and hydroquinone lipids	32676.5	25354.3	25807.5	28748.7	25371.4	31489.8	8670.9	8467.69	7868.69	9260.73	12415.2	8312.49	1.23587	1.5953e-07	6.4463e-07	3.0811	1.6235	up	C14155
POS_4705	Jacobine N-oxide	Others		15434.2	10350.5	16420.6	13856.2	12824.7	13242.5	942.319	615.18	1065.24	267.038	430.548	1028.68	1.24914	4.1244e-08	1.9855e-07	18.884	4.2391	up	0
POS_5073	Junipediol A 8-glucoside	Organooxygen compounds	Carbohydrates and carbohydrate conjugates	6244.68	4953.45	5756.76	12304.2	5177.56	12033.7	31668.6	31443.5	28391.8	29553.3	26411.6	38907.9	1.21481	1.1799e-06	3.7804e-06	0.24934	-2.0038	down	0
POS_5029	Junipediol B 8-O-glucoside	Organooxygen compounds	Carbohydrates and carbohydrate conjugates	11451.9	8964.18	11216.5	11090.9	9730.14	11553.9	1741.15	1736.35	1847.64	1689.62	1691.31	2362.11	1.25673	2.4506e-09	2.2148e-08	5.783	2.5318	up	0
POS_5079	Loratadine	Organoheterocyclic compounds		851.535	887.086	1697.99	512.957	805.398	316.897	36179	39374.6	36954.2	32590.7	34459.1	40086.8	1.25963	3.6526e-11	1.0935e-09	0.023091	-5.4365	down	C06818
POS_8494	Methyl 2-[(1R,5R,6R,13S,14S,16S)-14-acetyloxy-6-(furan-3-yl)-1,5,15,15-tetramethyl-8,17-dioxo-7-oxatetracyclo[11.3.1.02,11.05,10]heptadec-10-en-16-yl]acetate	Prenol lipids	Triterpenoids	12080.7	9681.39	13573.3	9790.35	8930.85	10042	934.558	770.008	946.254	1099.89	403.419	452.577	1.24551	9.0494e-08	3.9051e-07	13.914	3.7985	up	0
POS_7640	Mundulone acetate	Isoflavonoids	Isoflavans	1889.4	1869.53	3019.58	1773.02	1631.95	2640.29	18478.7	21480.3	16966.4	15581	16347.7	22849.7	1.23377	9.6541e-08	4.1474e-07	0.1148	-3.1228	down	0
POS_1361	Myristicin	Organoheterocyclic compounds		5467.25	4399.59	4447.12	4286.51	3820.45	4246.62	22499.5	22427.8	21299.6	19645	18774.4	23709.1	1.25249	1.1854e-09	1.248e-08	0.20776	-2.267	down	C10480
POS_6121	Nodakenin	Coumarins and derivatives	Furanocoumarins	654.892	590.799	791.506	239.798	639.166	366.085	6208.48	7068.82	6521.17	5614.47	6602.24	6409.1	1.25647	9.5293e-11	2.0287e-09	0.085421	-3.5493	down	0
POS_7249	Paeonolide	Others		997.853	724.556	759.196	960.72	653.505	996.937	26442.9	28684.9	23760.6	23804.4	27014.2	34727.2	1.24376	1.8828e-08	1.0719e-07	0.030971	-5.0129	down	0
POS_7158	Petunidin 3-galactoside	Flavonoids	Flavonoid glycosides	29199.1	15156.5	33485.3	21501.9	20370.6	23343.1	76.2907	66.8057	206.386	208.107	116.796	378.807	1.21025	4.8546e-06	1.3576e-05	135.83	7.0857	up	0
POS_591	Sabinene	Prenol lipids	Monoterpenoids	7824.75	9334.81	10485.1	9953.49	4633.76	9291.57	21772.8	20304.5	17992.4	17419.4	18394.3	18772.4	1.19662	2.2921e-06	6.9051e-06	0.44938	-1.154	down	0
POS_8895	Satratoxin H	Prenol lipids	Sesquiterpenoids	41971.1	24749.3	58883.4	31710.6	25797.7	27133	1595.58	2919.42	2561.11	654.18	2648.52	1537.38	1.14815	0.000118	0.00025633	17.644	4.1411	up	0
POS_1181	Serotonin	Organoheterocyclic compounds	Tryptamines and derivatives	9797.47	10984	10825.3	16952.3	12574.1	14796.1	5014.52	4129.56	3349.04	4896.46	2310.59	5489.46	1.14186	3.9685e-05	9.4105e-05	3.0143	1.5918	up	C00780
POS_4389	Staphylin	Organooxygen compounds	Carbohydrates and carbohydrate conjugates	2512.79	1105.65	1538.47	2295.41	2024.04	1078.66	15361.6	16456	14921.2	13611.8	13613.9	17406.6	1.25137	2.0265e-09	1.9532e-08	0.11552	-3.1138	down	0
POS_4488	Sweroside	Organooxygen compounds	Carbohydrates and carbohydrate conjugates	6705.05	5097.9	7611.21	5308.09	6115.45	5699.08	979.525	687.882	473.821	1348.02	1031.93	1002.17	1.23904	1.6015e-07	6.4463e-07	6.615	2.7257	up	0
POS_4931	Xanthohumol	Linear 1,3-diarylpropanoids	Chalcones and dihydrochalcones	2807.32	2778.78	3308.7	2691.68	2302.64	2658.51	22801.9	24105.7	19983	20141.4	17178.1	26184.3	1.23846	5.8563e-08	2.6589e-07	0.1269	-2.9782	down	C16417
NEG_4515	Lactulose	Organooxygen compounds	Carbohydrates and carbohydrate conjugates	4572.22	1933.47	3853.32	5422.01	5998.65	7832.77	60338.5	72881	109357	88610.6	55839.3	75292.3	1.19586	4.343e-06	1.2309e-05	0.064052	-3.9646	down	C07064
NEG_6571	5-{[4-(beta-D-Glucopyranosyloxy)benzyl]oxy}-3-hydroxy-3-methyl-5-oxopentanoic acid	Organooxygen compounds	Carbohydrates and carbohydrate conjugates	39044.4	36365	46322	38684.6	39076	42819.5	1.419e+06	1.62297e+06	1.29526e+06	1.36549e+06	1.2322e+06	1.91158e+06	1.23803	7.2133e-08	3.1992e-07	0.027391	-5.1902	down	0
NEG_8385	(6,6-Dimethylbicyclo[3.1.1]hept-2-yl)methyl 6-O-[(2R,3R,4R)-3,4-dihydroxy-4-(hydroxymethyl)tetrahydro-2-furanyl]-beta-D-glucopyranoside	Prenol lipids	Terpene glycosides	955.669	716.498	806.232	798.431	719.485	486.176	208683	228245	202911	203584	183336	232250	1.26046	6.9383e-11	1.6212e-09	0.0035603	-8.1338	down	0
NEG_3261	8-(2-Oxo-5-pent-2-enylcyclopent-3-en-1-yl)octanoic acid	Fatty Acyls	Eicosanoids	10013.1	13374.8	15998.6	15312.6	16365.9	14980.2	116617	102976	118916	120886	120203	102146	1.25786	1.1275e-10	2.3482e-09	0.12621	-2.9861	down	0
NEG_7090	Pentose-Hexose + C10H17	Prenol lipids	Terpene glycosides	528.903	638.82	561.611	751.768	226.902	568.608	159662	166201	146940	150751	128302	174047	1.25729	4.7366e-10	6.2321e-09	0.0035388	-8.1425	down	0
NEG_3142	Salicin	Organooxygen compounds	Carbohydrates and carbohydrate conjugates	1119.24	1269.23	1288.8	1220.92	1355.87	1673.6	110871	110844	99186.2	96830.7	88176.3	114002	1.25791	2.8315e-10	4.3751e-09	0.012788	-6.289	down	C01451
NEG_1009	Arginine	Carboxylic acids and derivatives	Amino acids, peptides, and analogues	29993.3	44854.2	29842.9	34196	43562.3	38415.5	5692.68	8631.89	9970.47	8868.97	13788.1	9327.14	1.18759	2.4835e-06	7.4351e-06	3.9244	1.9725	up	C00062
NEG_5563	Lactose	Others		3.89212e+06	3.56754e+06	5.38269e+06	5.28875e+06	4.31909e+06	4.89594e+06	1.60806e+07	1.29792e+07	1.2697e+07	1.72952e+07	1.2883e+07	1.24376e+07	1.21407	9.811e-07	3.2863e-06	0.32411	-1.6254	down	0
NEG_11723	Rhamnetin 3-sophoroside	Flavonoids	Flavonoid glycosides	386814	195073	651713	459814	585175	282213	83646	121353	108392	83983.9	85238.7	112850	1.05272	0.0010326	0.0019023	4.3005	2.1045	up	0
NEG_4520	Trehalose	Organooxygen compounds	Carbohydrates and carbohydrate conjugates	5.10251e+06	4.52595e+06	7.18291e+06	6.79221e+06	5.55642e+06	5.72219e+06	1.81506e+07	1.68579e+07	1.59154e+07	2.10812e+07	1.37945e+07	1.52182e+07	1.20728	1.8184e-06	5.5835e-06	0.34531	-1.534	down	C01083
NEG_6381	3-[(7S,8S)-5-Hydroxy-2,2,7,8-tetramethyl-6-oxo-7,8-dihydropyrano[3,2-g]chromen-10-yl]-3-phenylpropanoic acid	Organoheterocyclic compounds	1-benzopyrans	88907.2	66390.2	91146.7	82378.2	60935.1	73649	6572.98	7184.35	6282.34	5649.74	4742.68	7852.69	1.24777	6.3638e-08	2.8757e-07	12.104	3.5974	up	0
NEG_9789	4-[(E)-3-[(2R,3R,4S,5S,6R)-3-[(2S,3R,4R)-3,4-Dihydroxy-4-(hydroxymethyl)oxolan-2-yl]oxy-4,5-dihydroxy-6-(hydroxymethyl)oxan-2-yl]oxybut-1-enyl]-3,5,5-trimethylcyclohex-2-en-1-one	Fatty Acyls	Fatty acyl glycosides	28236.6	22119.5	31139.7	27568.5	23567	23885.2	162787	174177	145174	143360	129362	178971	1.24345	1.7976e-08	1.0546e-07	0.16761	-2.5768	down	0
NEG_5891	Benzyl alcohol + Hex-Pen	Organooxygen compounds	Carbohydrates and carbohydrate conjugates	22922.8	20442.7	19658.4	20068.2	20099.8	19438.9	744566	804580	691720	665290	590595	806133	1.25327	1.9434e-09	1.9394e-08	0.0285	-5.1329	down	0
NEG_566	Methionine	Carboxylic acids and derivatives	Amino acids, peptides, and analogues	166354	127808	145776	179419	170751	176201	61831	71002	75224	78818.3	71704.1	63563.9	1.21271	1.0266e-06	3.3968e-06	2.2891	1.1948	up	C00073
NEG_9835	3,5,5-Trimethyl-4-[3-[(6-O-beta-D-xylopyranosyl-beta-D-glucopyranosyl)oxy]butyl]-2-cyclohexen-1-one	Fatty Acyls	Fatty acyl glycosides	5845.39	5791.45	5717.68	3601.73	4455.47	5807.33	60159.8	97024.4	56046.3	87151.9	48050.1	68043.1	1.18842	8.7011e-06	2.3284e-05	0.07496	-3.7377	down	0
NEG_2394	Pinocembrin	Flavonoids	Flavans	23775.2	20905.2	22304.2	25988.3	21434.4	24447.7	111569	113364	115662	117812	105849	108319	1.26371	7.7422e-13	7.4171e-11	0.20645	-2.2761	down	C09827
NEG_7610	(2S,3S)-3,5,7-Trihydroxy-2-[4-hydroxy-3-[(2S,3R,4S,5S,6R)-3,4,5-trihydroxy-6-(hydroxymethyl)oxan-2-yl]oxyphenyl]-2,3-dihydrochromen-4-one	Flavonoids	Flavonoid glycosides	369176	415980	530164	455779	428898	1.04658e+06	79045.1	87212.3	77314.3	75160.6	71175.9	86803.4	1.02971	0.0012096	0.0021947	6.8104	2.7677	up	0
NEG_8700	3,4,5-Trihydroxy-6-[5-hydroxy-2-(4-hydroxy-3-methoxyphenyl)-3-methoxy-4-oxochromen-7-yl]oxyoxane-2-carboxylic acid	Flavonoids	Flavonoid glycosides	99393.8	100936	97421.1	105656	95517.3	106470	5945.46	6074.5	4796.35	4404.72	5006.51	6387.89	1.26403	1.6015e-13	2.1918e-11	18.562	4.2142	up	0
NEG_6752	Dihydrostilbene base + 3O, 1carboxy, O-Hex	Stilbenes	Stilbene glycosides	518297	394190	520679	493040	368601	471328	30305.1	32228.8	28891	28129.8	25487.3	31294.1	1.25339	1.559e-08	9.3347e-08	15.687	3.9715	up	0
NEG_9816	Flavonol base + 4O, O-MalonylHex	Flavonoids	Flavonoid glycosides	3.067e+06	2.2209e+06	3.15057e+06	2.92697e+06	2.43291e+06	2.78358e+06	291205	293363	254668	250095	236867	322212	1.25368	1.3503e-08	8.2397e-08	10.059	3.3305	up	C12638
NEG_7061	Kaempferol 7-O-glucoside	Flavonoids	Flavonoid glycosides	430314	357649	474035	423009	352498	390966	7793.26	13962.6	10281.5	7538.43	7889.1	10930.3	1.2602	1.5557e-09	1.5855e-08	41.587	5.3781	up	0
NEG_7046	Maritimein	Flavonoids	Flavonoid glycosides	521827	460307	530653	575083	563584	566656	48251.3	57975.9	54441.3	45155	40561.4	52205.2	1.25838	9.3546e-11	2.0287e-09	10.778	3.43	up	0
NEG_2388	Purpurin	Benzenoids	Anthraquinones	157393	134467	192372	138188	144002	154405	4499.92	6020.56	4630.03	3705.94	4140.08	5080.52	1.254	8.7754e-09	5.7581e-08	32.796	5.0355	up	0
NEG_8701	Quercetin-3-O-glucosyl-6''-acetate	Flavonoids	Flavonoid glycosides	1.82486e+07	1.424e+07	1.88264e+07	1.90535e+07	1.51617e+07	1.75676e+07	1.96569e+06	2.01408e+06	1.85622e+06	1.64888e+06	1.49941e+06	2.29989e+06	1.25574	4.7079e-09	3.5236e-08	9.1365	3.1916	up	0
NEG_3192	Eriodictyol	Flavonoids	Flavans	159334	122859	167786	152088	117042	136420	8934.69	9297.28	7920.06	9202.58	6706.01	8917.91	1.25324	1.8076e-08	1.0546e-07	16.782	4.0689	up	C05631
NEG_4146	1-(4-Hydroxyphenyl)-3-[(2R,3R,4S,5S,6R)-3,4,5-trihydroxy-6-(hydroxymethyl)oxan-2-yl]oxypropan-1-one	Fatty Acyls	Fatty acyl glycosides	12563.5	6428.04	7555.96	6677.24	7602.47	8727.96	35317.9	30699.7	39465	52016.5	30273.8	31666.4	1.1792	1.1293e-05	2.9558e-05	0.22583	-2.1467	down	0
NEG_3494	Fenhexamid	Benzenoids	Anilides	14016	14164.7	14620.5	15197.5	13402.1	14864.7	4086.56	5090.28	4379.67	3741.41	3333.04	3844.58	1.26009	6.7282e-11	1.6114e-09	3.5246	1.8174	up	0
NEG_7493	Hydrangeifolin I	Organooxygen compounds	Carbohydrates and carbohydrate conjugates	4149.55	4867.74	5141.18	4554.39	4052.42	5426.45	16287.3	16046.7	15021.3	14180.3	13810.5	17060	1.25039	3.7157e-09	2.9178e-08	0.30509	-1.7127	down	0
NEG_4237	(Z)-5,8,11-Trihydroxyoctadec-9-enoic acid	Fatty Acyls	Fatty acids and conjugates	28355.7	21860.9	29937.8	27672.6	26127.1	24922.3	214453	212880	196985	180923	156030	209859	1.24801	6.5083e-09	4.5845e-08	0.13566	-2.8819	down	0
NEG_8969	Isochlorogenic acid B	Others		495850	384921	494915	456847	355659	388191	35758.9	37159.2	32559	30598.3	28381	37382.2	1.25283	2.0252e-08	1.1215e-07	12.765	3.6741	up	0
NEG_444	Adenine	Organoheterocyclic compounds	Purines and purine derivatives	17724.4	16660.4	18234.6	17616	16033.2	18263.2	99810	103504	93469.2	96941.9	85682.4	102999	1.26027	6.0992e-11	1.6037e-09	0.17948	-2.4781	down	C00147
NEG_2605	Adenosine	Nucleosides, nucleotides, and analogues		14124.1	13767.1	15116.1	13489.5	13180.2	14371.3	87644.4	87830	83835.1	84160	77421.8	89865.2	1.26323	3.0368e-12	1.9395e-10	0.16456	-2.6033	down	C00212
NEG_3234	(-)-Epicatechin	Flavonoids	Flavans	7894.1	7434.99	2971.94	8351.68	6552.34	4163.58	201866	199935	183860	187167	159875	208398	1.25921	1.9341e-10	3.3087e-09	0.032748	-4.9325	down	C09727
NEG_13716	3-[6-[[(2R,3R,4R,5S,6S)-3,5-Dihydroxy-6-methyl-4-[(2S,3R,4R,5R,6S)-3,4,5-trihydroxy-6-methyloxan-2-yl]oxyoxan-2-yl]oxymethyl]-3,4,5-trihydroxyoxan-2-yl]oxy-2-(3,4-dihydroxyphenyl)-5,7-dihydroxychromen-4-one	Flavonoids	Flavonoid glycosides	202533	180068	207613	194249	169232	175046	18373.1	18765.1	16122.1	16765.5	15817.4	18683.7	1.26408	1.2565e-10	2.5612e-09	10.799	3.4328	up	0
NEG_621	3,4-Dihydroxybenzoic acid	Benzenoids	Benzoic acids and derivatives	301240	246867	311344	287503	256884	272298	11173.6	11254.1	12345.2	11201.8	7884.58	10974.8	1.26399	1.6042e-10	2.9554e-09	25.853	4.6922	up	C00230
NEG_6370	Mangiferin	Organoheterocyclic compounds	1-benzopyrans	156987	131915	149778	157788	141949	139062	17807.3	17085.4	15360.8	12388.8	13909.1	14044.6	1.26406	3.4562e-11	1.0681e-09	9.6856	3.2758	up	0
NEG_8643	Melezitose	Organooxygen compounds	Carbohydrates and carbohydrate conjugates	374237	321488	552810	490357	373085	399741	1.81053e+06	1.64032e+06	1.40045e+06	1.85406e+06	1.44217e+06	1.40734e+06	1.22943	1.4921e-07	6.0826e-07	0.26287	-1.9276	down	C08243
NEG_1184	Methyl gallate	Benzenoids	Benzoic acids and derivatives	124434	97413.7	139850	131171	106108	112514	5750.51	5620.42	4398.55	4435.87	1884.01	5332.82	1.25449	8.5854e-09	5.6723e-08	25.946	4.6974	up	0
NEG_9829	Raffinose	Organooxygen compounds	Carbohydrates and carbohydrate conjugates	785435	649480	1.20226e+06	1.07005e+06	767540	846143	4.74957e+06	4.05815e+06	3.26246e+06	4.56227e+06	3.2984e+06	3.57089e+06	1.2177	6.5851e-07	2.2611e-06	0.22641	-2.143	down	C00492
NEG_6228	2-Phenylethyl 6-O-[(2S,3R,4R)-3,4-dihydroxy-4-(hydroxymethyl)tetrahydro-2-furanyl]-beta-D-glucopyranoside	Organooxygen compounds	Carbohydrates and carbohydrate conjugates	108096	85277.4	108959	102432	73768.1	91827.6	315158	309782	263303	247037	216061	292527	1.21139	9.0255e-07	3.0338e-06	0.34696	-1.5271	down	0
NEG_7497	Bioside	Organooxygen compounds	Carbohydrates and carbohydrate conjugates	96227.1	82241.8	91074	97213.6	77054.5	90366.7	360972	360588	321800	303450	282079	343456	1.24676	6.7381e-09	4.7117e-08	0.27083	-1.8845	down	0
NEG_7185	Methyl (1R,4aS,9S,10S)-10-acetyloxy-5,9-dihydroxy-1,4a-dimethyl-2-oxo-7-propan-2-yl-10,10a-dihydro-9H-phenanthrene-1-carboxylate	Steroids and steroid derivatives	Hydroxysteroids	46608.1	30163.6	43130.8	44095.2	28007.7	37472.4	93675.3	93438.8	80359.1	76229.1	64737.4	88360.8	1.17008	1.2113e-05	3.1193e-05	0.46191	-1.1143	down	0
NEG_3341	13-HoTrE	Fatty Acyls	Lineolic acids and derivatives	56124.8	108089	55043	57845.5	48931.6	56445	554588	512232	1.02341e+06	1.07188e+06	612127	759560	1.1571	3.7862e-05	9.0453e-05	0.084362	-3.5673	down	0
NEG_1339	2,4-Dihydroxy-6-propylbenzoic acid	Benzenoids	Benzoic acids and derivatives	103524	93184.5	102557	101985	91031.6	102396	1144.75	1632.13	1408.16	871.266	1857.57	1273.48	1.26683	9.881e-13	8.6055e-11	72.634	6.1826	up	0
NEG_4953	3-O-Acetylpadmatin	Flavonoids	O-methylated flavonoids	51523.3	55269.4	47574	55835.4	51550.7	54904.1	150215	149140	136372	137666	122509	155092	1.25068	7.5633e-09	5.0669e-08	0.3721	-1.4262	down	0
NEG_8971	3,5-Dicaffeoylquinic acids	Organooxygen compounds	Alcohols and polyols	1.55336e+06	1.39851e+06	1.72399e+06	1.4982e+06	1.44202e+06	1.4426e+06	259700	123188	98984.4	177256	163989	207937	1.26197	2.4368e-10	3.8908e-09	8.7858	3.1352	up	0
NEG_4498	Boscalid	Benzenoids	Diphenylmethanes	53727.6	43099.6	54855.2	51204.4	43590.3	47045.1	290.523	902.781	440.217	373.104	349.289	230.633	1.26261	4.7489e-10	6.2321e-09	113.48	6.8263	up	0
NEG_1080	Caffeic acid	Cinnamic acids and derivatives	Hydroxycinnamic acids and derivatives	209926	130024	166741	174987	130708	195706	21323.4	21461.5	21094.4	20406.7	16468.4	22903.7	1.22743	6.8543e-07	2.3423e-06	8.1522	3.0272	up	C01481
NEG_1079	cis-Caffeic acid	Cinnamic acids and derivatives	Hydroxycinnamic acids and derivatives	151002	115482	145956	147185	114867	129415	63661.1	60990	51222.4	57972.4	41730.8	62412.8	1.22238	1.1635e-06	3.7655e-06	2.3785	1.25	up	0
NEG_4762	Cryptochlorogenic acid	Organooxygen compounds	Alcohols and polyols	8.69043e+06	5.96558e+06	7.28226e+06	7.42858e+06	5.65469e+06	6.65246e+06	3.21976e+06	2.89693e+06	2.60333e+06	2.79977e+06	2.00496e+06	3.20536e+06	1.20163	6.6749e-06	1.8218e-05	2.491	1.3167	up	0
NEG_7486	Hispidulin 4'-glucoside	Flavonoids	Flavonoid glycosides	61469.6	53324.7	55486	61618	50309.5	60395.1	3007.06	3233.67	3401.7	3416.31	2982.93	2886.74	1.26193	8.6477e-11	1.9266e-09	18.1	4.1779	up	0
NEG_3461	Hydroxygenkwanin	Others		86364.7	69108.6	83933.7	83440.5	68576.2	78100.6	18386.7	20830.2	17641.8	17189.7	16595.3	18258.6	1.25705	4.3479e-09	3.3058e-08	4.3114	2.1082	up	0
NEG_11397	Isorhamnetin-3-O-galactoside-6''-rhamnoside	Others		79349.1	65253.3	74965.4	71308.5	66236.3	65899.7	4628.87	4815.35	4246.61	4541.71	4435.88	5120.7	1.26456	7.8879e-11	1.7992e-09	15.222	3.9281	up	0
NEG_4759	Neochlorogenic acid	Organooxygen compounds	Alcohols and polyols	2.68651e+06	1.64353e+06	3.00837e+06	2.55559e+06	1.67713e+06	2.04797e+06	647031	696467	598631	572826	435714	695318	1.17793	3.2719e-05	7.9354e-05	3.7354	1.9013	up	C17147
NEG_1815	Olivetolic acid	Benzenoids	Benzoic acids and derivatives	146828	139396	133450	152623	136837	154428	10859.8	10837.4	10668.8	10595.4	10598	10408.5	1.2621	4.117e-12	2.1911e-10	13.5	3.7549	up	0
NEG_457	Threonic acid	Organooxygen compounds	Carbohydrates and carbohydrate conjugates	137109	158818	147457	155614	174924	164476	26552.8	27248.9	28752.7	30437	36291.5	29190.2	1.24835	6.0121e-10	7.6795e-09	5.2579	2.3945	up	C01620
NEG_3340	8-hydroxyoctadeca-9,12,15-trienoic acid	Fatty Acyls	Fatty acids and conjugates	79506.9	73652.2	78685.5	79542.8	68880.1	79859.8	196344	169455	211809	216019	213329	186814	1.2392	2.0702e-08	1.1398e-07	0.38544	-1.3754	down	0
NEG_3259	FA 18:4;O	Fatty Acyls	Fatty acids and conjugates	79925.2	69709.5	84425.1	79592.2	70842.1	77257.1	293436	294520	278381	277228	260915	290977	1.26091	7.5283e-12	3.4343e-10	0.27235	-1.8765	down	0
NEG_3375	9-Hydroxy-10E,12Z-octadecadienoic acid	Fatty Acyls	Lineolic acids and derivatives	50299	83464.4	79966.8	86348.2	54902.7	83744.8	243934	213138	279861	295818	313424	194646	1.19278	4.129e-06	1.1843e-05	0.28474	-1.8123	down	0
NEG_4158	9,12,13-Trihydroxyoctadeca-10,15-dienoic acid	Fatty Acyls	Lineolic acids and derivatives	26214.1	20609.4	18922.5	17293.9	14789.6	23029.3	96962.4	105969	93522.5	91636.9	73681.7	113890	1.23193	1.4191e-07	5.8256e-07	0.20995	-2.2519	down	0
NEG_3131	Luteolin	Flavonoids	Flavones	755588	689299	785620	729237	687079	718188	210887	221331	203123	202755	183484	220719	1.26506	2.6813e-11	8.8576e-10	3.5137	1.813	up	C01514
NEG_10462	Procyanidin B2	Flavonoids	Biflavonoids and polyflavonoids	233.399	587.526	591.02	410.335	1071.55	215.628	55273	57050.5	48833.9	49014.7	45279.9	60721	1.25546	9.7973e-10	1.1096e-08	0.0098347	-6.6679	down	C17639
NEG_4013	Bavachin	Flavonoids	Flavans	3.13885e+06	3.80241e+06	2.42325e+06	3.7034e+06	3.59344e+06	3.97292e+06	1.21862e+06	1.03111e+06	1.64217e+06	1.75916e+06	1.71506e+06	931367	1.15176	2.2741e-05	5.615e-05	2.4868	1.3143	up	0
NEG_4445	Licocoumarone	Flavonoids		75950.3	102248	63375.6	85919.8	101091	95731.3	27083.9	23318.9	31422.7	29301.5	33387.9	20456.5	1.18038	3.863e-06	1.1147e-05	3.1782	1.6682	up	0
NEG_6382	Mulberrin	Flavonoids	Flavones	43014.6	45547.3	40250.3	47299.2	44910.8	48018.9	1081.89	1022.57	1104.41	1010.43	570.042	1292.48	1.25887	4.528e-12	2.2831e-10	44.237	5.4672	up	0
NEG_2991	Guanosine	Nucleosides, nucleotides, and analogues		16524.5	14307.5	18241.9	15420.3	14835.6	15187.7	38493.9	40306.5	35987.7	34403.1	34360.8	43019.6	1.23454	5.4328e-08	2.5143e-07	0.41716	-1.2613	down	0
NEG_4776	Humantenine	Others		4254.3	2871.4	4266.52	3405.61	5168.69	3754.79	24430.2	23029.3	27104.7	30189.2	24054.3	21453.9	1.24295	1.8909e-08	1.0719e-07	0.15787	-2.6632	down	0
NEG_3762	(9Z,15Z)-12,13-Dihydroxyoctadeca-9,15-dienoate	Fatty Acyls	Fatty acids and conjugates	6942.3	2842.79	9485.46	9060.15	6317.48	7129.19	19785.1	19431.1	33603.1	22883.3	34004.8	17605.8	1.08831	0.00023824	0.00048619	0.2836	-1.8181	down	0
NEG_14254	[4-[4,5-Dihydroxy-6-methyl-3-[3,4,5-trihydroxy-6-(hydroxymethyl)oxan-2-yl]oxyoxan-2-yl]oxy-6-[2-(3,4-dihydroxyphenyl)ethoxy]-3,5-dihydroxyoxan-2-yl]methyl (E)-3-(3,4-dihydroxyphenyl)prop-2-enoate	Organooxygen compounds	Carbohydrates and carbohydrate conjugates	3472.91	3709.42	3036.82	3087.47	4296.03	3131.86	7965.27	8640.72	7330.07	7347.97	5989.6	8501.62	1.20935	2.853e-06	8.4096e-06	0.45296	-1.1425	down	0
NEG_5401	1-Myristoyl-sn-glycerol 3-phosphate	Glycerophospholipids	Glycerophosphates	19096.1	25665.7	17882	21069.6	23742.2	20016	41506.3	35764.8	44797.7	45927.7	53421.4	33771	1.14871	5.312e-05	0.0001228	0.49952	-1.0014	down	0
NEG_5885	2-O-Glucosyloxy-4-methoxycinnamic acid	Organooxygen compounds	Carbohydrates and carbohydrate conjugates	4096.06	4560.38	4552.65	4028.6	3239.57	4245.82	23437.4	22871.1	19359.2	19757.2	19115.3	22898.3	1.25191	2.0023e-09	1.9532e-08	0.194	-2.3659	down	0
NEG_1314	3-(4-Hydroxy-3-methoxyphenyl)-2-propenoic acid	Cinnamic acids and derivatives	Hydroxycinnamic acids and derivatives	3449.73	2785.02	3879.15	3525.16	2901.46	3845.95	26119.1	24391.9	19640	24436.9	17233.1	26517	1.23237	1.6908e-07	6.7774e-07	0.14737	-2.7625	down	0
NEG_15587	3-[(2S,3R,4S,5S,6R)-4,5-Dihydroxy-3-[(2S,3R,4R,5R,6S)-3,4,5-trihydroxy-6-methyloxan-2-yl]oxy-6-[[(2S,3R,4R,5R,6S)-3,4,5-trihydroxy-6-methyloxan-2-yl]oxymethyl]oxan-2-yl]oxy-5-hydroxy-2-(4-hydroxyphenyl)-6-methoxy-7-[(2S,3R,4R,5R,6S)-3,4,5-trihydroxy-6-methyloxan-2-yl]oxychromen-4-one	Flavonoids	Flavonoid glycosides	36958.1	28320	41388.2	33886.3	30806.4	33634.7	4178.6	4354.27	3803.93	3422.84	3560.6	4510.71	1.25279	1.871e-08	1.0719e-07	8.602	3.1047	up	0
NEG_4571	3-[2-Hydroxy-3-[(2S,3R,4S,5S,6R)-3,4,5-trihydroxy-6-(hydroxymethyl)oxan-2-yl]oxyphenyl]propanoic acid	Organooxygen compounds	Carbohydrates and carbohydrate conjugates	12427	12112.6	11702.2	12417.8	10120.6	13658.9	35262.2	36923.1	30778	30416.2	26332.8	38518.5	1.21783	8.037e-07	2.7303e-06	0.36543	-1.4523	down	0
NEG_3402	3-Hydroxy-7-methoxy-2-(4-methoxyphenyl)-4H-chromen-4-one	Flavonoids	Flavones	4745.37	201.84	5351.37	4065.79	92.8171	4067.63	16491.4	17170.6	15843.1	15698.4	14090.2	17567.4	1.21632	2.6536e-07	9.9303e-07	0.19125	-2.3865	down	0
NEG_556	3,4-Dihydrocoumarin	Coumarins and derivatives		3990.45	4100.24	4531.96	4985.46	4224.94	4315.58	28264	28257.2	25096.7	24639.2	24695.3	27717.9	1.26006	4.934e-11	1.4274e-09	0.1648	-2.6012	down	C02274
NEG_327	4-Vinylphenol	Benzenoids	Styrenes	1984.85	2295.79	1556.11	3036.84	2497.81	2385.75	14926.8	15887.5	14147.6	13373.4	12037.5	15475.5	1.25372	2.9262e-09	2.5485e-08	0.16025	-2.6416	down	C05627
NEG_5592	Alfuzosin	Organoheterocyclic compounds	Benzodiazines	7917.06	7609.46	7223.03	7213.78	5259.07	6640.14	235.992	48.0064	163.34	277.046	75.6323	138.592	1.25263	7.4518e-09	5.0273e-08	44.601	5.479	up	0
NEG_4354	Altertoxin I	Benzenoids		9596.48	5940.44	7474.56	8944.04	5579.61	7339.51	3344.99	2275.92	2544.32	2303.97	2035.81	2637.23	1.17894	2.4718e-05	6.0716e-05	2.9635	1.5673	up	0
NEG_4758	Chlorogenic acid	Organooxygen compounds	Alcohols and polyols	31176.6	28990	26471.8	27475.2	22568	28008.9	6260.02	9393.54	8072.99	5246.7	8808.87	11108.7	1.23736	1.1839e-07	4.9559e-07	3.3685	1.7521	up	C00852
NEG_1059	Coniferyl aldehyde	Phenols	Methoxyphenols	526.146	1815.37	1135.04	1237.54	1632.76	915.97	27729.6	32736.7	25870.5	27149.4	27319.3	31430.9	1.25833	3.057e-10	4.5454e-09	0.042168	-4.5677	down	0
NEG_11056	Diosmetin-7-O-rutinoside	Flavonoids	Flavonoid glycosides	40325.9	29906.7	38567.4	30980.1	29061.2	29958.2	9251.01	11181.9	5036.46	5109.89	5764.99	9796.13	1.22999	6.3925e-07	2.2188e-06	4.3086	2.1072	up	C10039
NEG_930	Gallic acid	Benzenoids	Benzoic acids and derivatives	36001.1	23982.9	34504.3	33326.4	23462.7	31752.7	7114.91	7020.47	7060.95	6728.68	5318.07	8238.32	1.22641	1.0401e-06	3.424e-06	4.4123	2.1415	up	C01424
NEG_5746	gamma-Mangostin	Organoheterocyclic compounds	1-benzopyrans	1501.54	1124.73	1513.22	1560.87	778.574	817.678	28790.4	31972	26535.6	25767.9	20475	30808.7	1.2427	2.6841e-08	1.3509e-07	0.044397	-4.4934	down	0
NEG_2637	Genistein	Isoflavonoids	Isoflav-2-enes	18254.7	16628.4	18901	18559	16227.6	17441.5	1463.19	2148.08	1524.41	2081.42	949.622	2275.83	1.2644	1.7647e-11	6.7623e-10	10.152	3.3437	up	C06563
NEG_5749	Hexose + C10H19O2	Organooxygen compounds	Carbohydrates and carbohydrate conjugates	4202.45	3452.06	6886.49	7894.18	5937.44	3697.75	27003.4	27572.6	30604.3	30232.3	20067.1	26106.9	1.2292	1.9845e-07	7.8562e-07	0.19847	-2.333	down	0
NEG_8627	Hypericin	Benzenoids	Benzopyrenes	43768.3	38930.8	48444.7	50191.8	39660.1	45433.1	19076.3	16395.4	15074.9	9465.48	13421.4	19431	1.23187	2.8725e-07	1.0708e-06	2.869	1.5206	up	0
NEG_2618	Inosine	Nucleosides, nucleotides, and analogues		11250.6	8998.06	12595.5	9425.37	8525.09	9976.26	57633.2	64240.7	51097.7	53510.7	48995.6	70380.3	1.2357	7.4146e-08	3.2584e-07	0.17571	-2.5087	down	0
NEG_8963	Isochlorogenic acid A	Organooxygen compounds	Alcohols and polyols	35600.4	24135.5	31698	27219	20157.7	40278.9	2808.6	2130.27	1419.79	2337.06	2179.5	2552.06	1.20617	3.978e-06	1.1444e-05	13.338	3.7374	up	0
NEG_4880	Matairesinol	Others		3736.76	2895.95	4194.19	3060.68	2902.64	3683.92	13615.4	17734.3	13663	10979.1	8907.07	17674	1.15785	3.3222e-05	8.0369e-05	0.24795	-2.0119	down	0
NEG_2950	Octyl gallate	Others		16373.7	13710.2	16512.3	15248.2	13630.3	14541.1	50959.2	54428.8	47132.1	46848	44056.8	54287.2	1.24877	3.5292e-09	2.9177e-08	0.30236	-1.7257	down	0
NEG_559	p-Coumaraldehyde	Cinnamic acids and derivatives		7189.9	5745.7	7517.37	6192.18	5967.57	5824.07	18764.7	19854.5	18668.5	18610.5	14943.9	19203.8	1.23951	2.5575e-08	1.3032e-07	0.34928	-1.5175	down	0
NEG_575	p-Coumaryl alcohol	Cinnamic acids and derivativess		2276.96	2085.91	1790.14	2623.42	2185.39	2561.61	25837.1	26544.5	21891	24353.8	19591.6	26350.6	1.25247	3.6142e-09	2.9177e-08	0.093543	-3.4182	down	0
NEG_6485	Pentose-Hexose + C5H9	Fatty Acyls	Fatty acyl glycosides	1801.71	1460.9	2207.5	1756.84	1757.1	1986.07	28623.6	27568	24972.8	24374.4	21854.5	28646.2	1.25454	1.0038e-09	1.1152e-08	0.070303	-3.8303	down	0
NEG_3787	Porphyrillic acid	Organoheterocyclic compounds	Dibenzofurans	15140.4	8782.03	18816.3	10789.9	6820.4	9551.7	1118.04	5235.82	2729.19	2976.27	2037.16	4129.78	1.06308	0.0011853	0.0021547	3.8352	1.9393	up	0
NEG_10464	Procyanidin B1	Flavonoids	Biflavonoids and polyflavonoids	1112.55	1694.16	690.496	2004	1957.74	1207.29	3903.71	3736.97	2716.15	4088.09	2930.43	4161.83	1.15807	6.8956e-05	0.0001558	0.40238	-1.3134	down	C10221
NEG_5169	Stenophylline A	Organooxygen compounds	Carbohydrates and carbohydrate conjugates	10853.6	9413.91	10660.5	10719.4	7645.42	9805.95	25277.2	26756.3	25140.6	23863.6	23251.6	26576.1	1.24767	2.0388e-09	1.9532e-08	0.39173	-1.3521	down	C05158
NEG_6044	Tinnevellin glucoside	Others		9697.18	7068.17	10411.6	9127.37	6886.96	8113.6	4317.65	4105.68	3171.82	3200.97	2650.58	4111.37	1.18822	1.7046e-05	4.3201e-05	2.3798	1.2509	up	0
NEG_907	Vanillic acid	Benzenoids	Benzoic acids and derivatives	5333.3	5085.64	3466.68	5080.89	5096.73	5424.83	15092.1	7979.28	12409.5	12768.3	13776	9135.63	1.11977	0.00013408	0.00028737	0.41439	-1.271	down	C06672
POS_6508	Luteolin 7-galactoside	Flavonoids	Flavonoid glycosides	2.39483e+07	2.95249e+07	2.21761e+07	2.64781e+07	4.35565e+07	2.32125e+07	216593	499267	422970	164827	424732	159434	1.17357	6.7251e-06	1.8303e-05	89.466	6.4833	up	0
POS_6506	Plantaginin	Flavonoids	Flavonoid glycosides	2.76075e+07	2.49232e+07	1.66391e+07	1.58239e+07	1.89031e+07	2.90535e+07	465764	370634	267897	360425	174959	500843	1.19784	3.1874e-06	9.3096e-06	62.111	5.9568	up	0
POS_2462	2-(((R)-2,3-Dihydroxypropyl)phosphoryloxy)-N,N,N-trimethylethanaminium	Glycerophospholipids	Glycerophosphocholines	29957.7	34746.7	57031	35118.6	31186.9	15389.1	130772	145331	140597	121376	116468	137296	1.23003	8.3508e-08	3.6364e-07	0.25691	-1.9607	down	0
POS_615	Tropine	Alkaloids and derivatives		689634	847013	1.10447e+06	721974	762887	646411	102415	109009	117425	124003	103832	105694	1.21502	1.4698e-06	4.6167e-06	7.2049	2.849	up	C06173
POS_8072	(2-Hydroxy-3-octadeca-6,9,12-trienoyloxypropyl) 2-(trimethylazaniumyl)ethyl phosphate	Glycerophospholipids	Glycerophosphocholines	2.50672e+06	2.26749e+06	2.63194e+06	2.45182e+06	2.536e+06	2.18731e+06	5.67656e+06	6.07683e+06	5.27151e+06	6.02194e+06	4.75582e+06	7.33909e+06	1.20397	2.8484e-06	8.4096e-06	0.41493	-1.2691	down	0
POS_3309	(6E)-Heptadeca-6,16-diene-1,2,4-triol	Fatty Acyls	Fatty alcohols	49653.5	29922.1	48783.9	49637.1	49099.2	46555	168761	183405	156648	148319	145672	183535	1.24119	2.2564e-08	1.2009e-07	0.27744	-1.8497	down	0
POS_2910	[3-[(1Z,9Z)-Octadeca-1,9-dienoxy]-2-octadecanoyloxypropyl] 2-(trimethylazaniumyl)ethyl phosphate	Glycerophospholipids	Glycerophosphocholines	844923	766747	887227	845167	730265	770642	2.35124e+06	2.38278e+06	2.19773e+06	2.00618e+06	1.86539e+06	2.64741e+06	1.22606	2.473e-07	9.3273e-07	0.3602	-1.4731	down	0
POS_6661	[3-Hydroxy-1-(4-methoxy-7-oxofuro[3,2-g]chromen-9-yl)oxy-3-methylbutan-2-yl] (E)-2-methylbut-2-enoate	Coumarins and derivatives	Furanocoumarins	40693.2	37964	80487.4	51563.3	48914.5	34827.8	126618	136021	127732	143753	89717.4	125496	1.16262	2.2188e-05	5.5068e-05	0.39295	-1.3476	down	0
POS_5804	2,3-dimethyl-5-(3,7,11,15-tetramethylhexadec-2-en-1-yl)cyclohexa-2,5-diene-1,4-dione	Others		69203.3	64751	71693.7	74001.1	63767.6	64332.6	197426	207473	197755	183545	171049	214526	1.24953	3.5431e-09	2.9177e-08	0.34798	-1.5229	down	0
POS_3746	8-(3-Methoxy-2-(methoxycarbonyl)phenyl)octanoic acid	Benzenoids	Benzoic acids and derivatives	16817.7	13890.7	17326	12962.4	12320.1	13465.7	69377.9	73843	61218.8	59933.5	51025.2	77457.5	1.22778	2.1577e-07	8.2684e-07	0.2209	-2.1785	down	0
POS_3047	8-[3-Oxo-2-[(E)-pent-2-enyl]cyclopenten-1-yl]octanoic acid	Fatty Acyls	Fatty acids and conjugates	58953.4	35717.7	53564.7	51607.3	35145	44095.4	223388	207683	192374	171387	129018	203250	1.20478	1.7608e-06	5.4415e-06	0.24761	-2.0138	down	0
POS_3101	Acetylsulfamethoxazole	Benzenoids	Benzenesulfonamides	105544	105810	104180	105193	110826	86029.9	295241	313326	302363	237817	288768	271044	1.23956	2.2254e-08	1.1977e-07	0.36146	-1.4681	down	0
POS_6917	Cephaeline	Alkaloids and derivatives		16569.5	13778.2	17331.8	16308.8	8716.85	10166.5	58601.4	61899.1	68452.8	46096.6	74349.2	68695.7	1.21251	4.8801e-07	1.7125e-06	0.21918	-2.1898	down	0
POS_1295	Deethylatrazine	Organoheterocyclic compounds	Aminotriazines	525736	454650	580300	510028	453432	500451	130856	136205	114095	106725	91363.9	145996	1.25546	5.6198e-09	4.0786e-08	4.1705	2.0602	up	C06559
POS_2304	Desacetoxymatricarin	Organoheterocyclic compounds	Gamma butyrolactones	1129.64	1057.42	1033.63	1253.67	841.753	1226.42	56216.6	62032.4	51256	56745.8	52311.2	62726.4	1.26073	6.2589e-11	1.6037e-09	0.01917	-5.705	down	0
POS_5796	Diosgenin	Prenol lipids	Triterpenoids	34274.3	22560.1	17989.2	24099.1	22417.5	21144	112874	105372	46764.1	90318	77098	115054	1.13198	0.00010285	0.00022703	0.26026	-1.942	down	C08898
POS_11102	Enniatin B1	Peptidomimetics	Depsipeptides	612.074	4915.67	3143.47	5083.08	568.789	796.039	64273.8	72001.3	57610.9	55887.9	55966.7	70946	1.25135	3.3142e-09	2.8603e-08	0.040137	-4.6389	down	0
POS_3252	Fenpropimorph	Benzenoids	Phenylpropanes	242163	206986	231234	232011	214474	218766	1.29193e+06	1.38171e+06	1.33475e+06	1.36927e+06	1.10696e+06	1.54954e+06	1.25145	3.664e-09	2.9177e-08	0.16749	-2.5779	down	0
POS_2744	Nandrolone	Steroids and steroid derivatives	Estrane steroids	3569.43	12051	10519.2	14745.1	9895.82	14044.4	147220	156463	133949	125960	115036	155035	1.25095	5.2654e-09	3.8506e-08	0.077759	-3.6848	down	C07254
POS_2430	Palmitic amide	Others		1.08039e+06	684920	991390	832852	767736	770283	2.61027e+06	2.13475e+06	2.1903e+06	1.91056e+06	1.64685e+06	1.89865e+06	1.17398	9.7341e-06	2.576e-05	0.4138	-1.273	down	0
POS_11501	Solanidine base + O-Hex-dHex	Steroids and steroid derivatives	Steroidal glycosides	17558.7	12161	17897.1	15946.9	11383.9	15067.5	360091	347989	349122	245401	490376	285314	1.19811	2.0681e-06	6.2895e-06	0.043312	-4.5291	down	0
POS_4250	Vinpocetine	Alkaloids and derivatives		15316	14043.8	17615	16106.2	12129.2	15425.9	88137	86629.7	73876.4	77492.1	70242.6	91222.5	1.2492	4.5471e-09	3.4301e-08	0.18588	-2.4275	down	0
POS_6669	Amethopterin	Organoheterocyclic compounds	Pterins and derivatives	7284.08	4087.87	8513.19	6386.48	4959	5848.64	51823.6	54921.4	51146.2	51054	47852.7	52796.3	1.26112	2.6097e-12	1.7858e-10	0.11977	-3.0617	down	C00855
POS_11705	beta-Solanine	Steroids and steroid derivatives	Steroidal glycosides	17477.5	13488.3	15259.4	20397.7	10782.6	15384.8	84588.2	82026.5	34357.3	54542.6	63370.2	44653.4	1.0918	0.00029121	0.00058364	0.25524	-1.9701	down	0
POS_3299	Cimifugin	Organoheterocyclic compounds	1-benzopyrans	39332.7	37655.3	43524.7	34357.7	36313.2	37449.7	5051.46	5915.23	5470.12	5797.19	5548.49	6131.23	1.26176	2.1603e-10	3.6049e-09	6.7416	2.7531	up	0
POS_5937	Fludrocortisone acetate	Steroids and steroid derivatives	Pregnane steroids	7045.31	6983.92	7409.26	7271.98	6439.89	6578.63	43664	46884.1	50393.3	43780.9	48434.8	50042.9	1.25973	1.5757e-11	6.5629e-10	0.14735	-2.7627	down	C00762
POS_280	Histamine	Organonitrogen compounds	Amines	41280.5	46024.5	39228.3	34874.3	39421.2	40589.7	3893.56	4396.31	4635.95	4670.27	4236.73	4246.46	1.25449	3.2042e-10	4.6139e-09	9.2571	3.2106	up	C00388
POS_4589	Hydrocortisone	Steroids and steroid derivatives	Hydroxysteroids	5001.34	3008.74	2546.03	3106.33	2560.51	3433.27	49443.9	51427.3	43462	47159	32995.4	41910.7	1.24146	3.3668e-08	1.6456e-07	0.073785	-3.7605	down	C00735
POS_1248	Phosphorylcholine	Organonitrogen compounds	Quaternary ammonium salts	55578.9	56894.9	57699.7	55588.3	53115.8	56998.8	21205	18324.4	20446.6	21337.6	18408.8	17963.6	1.26406	2.5635e-12	1.7858e-10	2.854	1.513	up	0
POS_7232	1-Pentadecanoyl-sn-glycero-3-phosphocholine	Glycerophospholipids	Glycerophosphocholines	58732.4	41316.5	66115.8	54405.9	49373.8	54622.7	122403	132321	111703	97524.1	88106.3	133413	1.15543	2.8561e-05	6.9622e-05	0.4735	-1.0786	down	C04230
POS_6099	All-rac-3,4-Dehydro-alpha-tocopherol	Others		197211	162940	216017	181203	162986	172632	513697	520499	466355	435274	415134	520816	1.23334	5.8054e-08	2.6484e-07	0.3806	-1.3937	down	0
POS_1609	Dimethirimol	Others		109409	113654	105633	117891	109526	115299	38914.5	40748.4	41571.7	38459.6	38626.8	39562.2	1.26018	3.9894e-12	2.1911e-10	2.8224	1.4969	up	0
POS_1	Trimethylamine	Organonitrogen compounds	Amines	201596	206379	339892	216621	211778	181263	122662	56519.9	136789	127444	108615	122528	1.04291	0.0014119	0.0025378	2.0125	1.009	up	C00565
POS_7044	6-[(4E,6E)-2,3-Dihydroxy-4,6-dimethyl-7-(2,4,5-trimethyl-3,6-dioxabicyclo[3.1.0]hexan-2-yl)hepta-4,6-dien-2-yl]-4-methoxy-3,5-dimethylpyran-2-one	Fatty Acyls	Fatty alcohols	177222	103098	250672	157574	114312	130573	35302.9	37222.7	23201.8	28169.6	23999.6	36407.3	1.12835	0.0002211	0.00045552	5.0647	2.3405	up	0
POS_4210	Camptothecin	Alkaloids and derivatives		307834	293989	312411	309269	295921	293533	35176.3	38062.5	33662.7	31744.6	31901	37603.6	1.26745	5.8772e-15	2.8152e-12	8.7098	3.1226	up	0
POS_7767	Catalposide	Organooxygen compounds	Carbohydrates and carbohydrate conjugates	76841.7	63594.5	91214.3	72021.3	64740.8	68890	12468	13011.4	10204.2	10090.2	9977.73	13172.8	1.24842	4.6332e-08	2.1864e-07	6.3447	2.6655	up	0
POS_2946	Fisetin	Flavonoids	Flavones	637905	1.23037e+06	420113	627029	639757	625397	7003.53	19346.7	13067.2	7492.51	16347.8	8192.09	1.1097	0.00011561	0.00025171	58.511	5.8706	up	C10041
POS_6079	Isolupalbigenin	Isoflavonoids	Isoflav-2-enes	98545	73633.6	122734	84244.5	75481.8	88224.3	24950.9	24546.4	17998.7	17507.4	16132.8	28309	1.20985	4.4002e-06	1.2435e-05	4.1938	2.0682	up	0
POS_10217	Jaslanceoside A	Prenol lipids	Terpene glycosides	103727	86285.7	110667	92525.8	90588	88417.4	1097.72	1690.32	1092.03	520.529	934.534	1543.47	1.2627	3.7491e-10	5.131e-09	83.187	6.3783	up	0
POS_8297	Maltotriose	Organooxygen compounds	Carbohydrates and carbohydrate conjugates	100195	245733	301664	138788	226584	104862	907284	1.10557e+06	1.07028e+06	1.21004e+06	1.23042e+06	1.02416e+06	1.23986	3.2039e-08	1.5821e-07	0.17072	-2.5503	down	0
POS_3227	Quercetin	Flavonoids	Flavones	846023	775302	989237	799421	714190	765797	114529	120635	103774	82708	86371.1	124382	1.25576	6.4173e-09	4.5539e-08	7.7324	2.9509	up	C00389
POS_7890	Scutellarioside II	Cinnamic acids and derivatives	Hydroxycinnamic acids and derivatives	142520	123788	168484	130933	119249	126301	34375.2	38444.6	32521.1	30848.7	26122.6	40339.4	1.24242	1.2051e-07	5.0196e-07	4.0033	2.0012	up	0
POS_12759	Ginsenoside Rk1	Others		74297.5	76804.9	70692.4	77613.4	71547.3	77802.2	31595.7	33792	31837.9	30793.1	31483.3	32679.6	1.25874	2.2212e-11	7.5997e-10	2.3351	1.2235	up	0
POS_2487	Lofexidine	Benzenoids	Halobenzenes	364182	272191	435537	320826	283004	313036	101208	98160.9	76908.5	80130.5	59956.9	116456	1.21448	2.9753e-06	8.7434e-06	3.7325	1.9002	up	0
POS_3084	9-Oxooctadeca-10,12-dienoic acid	Fatty Acyls	Lineolic acids and derivatives	96323.9	74217.8	101078	79577.6	82265.5	80886.1	286626	264489	245579	240002	198508	317989	1.20749	1.617e-06	5.0294e-06	0.33116	-1.5944	down	0
POS_1313	Tilarginine	Carboxylic acids and derivatives	Amino acids, peptides, and analogues	240961	231629	432081	257704	251538	212626	128885	134621	157144	140597	93071.7	107061	1.03271	0.0017785	0.0031378	2.1363	1.0951	up	C03884
POS_8249	1-Stearoyl-sn-glycero-3-phosphocholine	Glycerophospholipids	Glycerophosphocholines	58455.7	54246.6	60402.7	43632.5	35859.1	50347.7	13455	18836.5	11437.5	12847.3	13784.7	14353.2	1.211	3.3852e-06	9.8273e-06	3.5761	1.8384	up	C04230
POS_8492	Flavone base + 4O, O-MalonylHex	Flavonoids	Flavonoid glycosides	76922.5	71370	85097.7	68329.3	69899.4	70058.9	29316.4	30963.6	23257.9	23989.4	20339.9	27002	1.24819	2.4205e-08	1.2603e-07	2.8519	1.5119	up	0
POS_6847	Delphinidin 3-glucoside	Flavonoids	Flavonoid glycosides	86940.4	74409	57649	101396	109057	75036.9	13134.2	13856.5	15197.7	19154.5	19103.6	13516	1.18168	5.4573e-06	1.5154e-05	5.369	2.4247	up	0
POS_8894	Quercetin 3-O-malonylglucoside	Flavonoids	Flavonoid glycosides	609657	501223	705349	582939	540073	544721	201845	215059	185637	181262	163492	229697	1.23859	2.0458e-07	7.9709e-07	2.9601	1.5656	up	0
POS_3618	Isobavachalcone	Linear 1,3-diarylpropanoids	Chalcones and dihydrochalcones	122592	90488.6	121313	106403	95747.6	102405	51631.5	56175.3	44480.1	47282.7	42861.8	53399	1.22079	1.778e-06	5.4768e-06	2.1599	1.1109	up	C08648
POS_3518	Phytosphingosine	Organonitrogen compounds	Amines	36379.6	34283.3	39842.2	39106.8	33246.6	36747.4	115259	111415	95561.3	93711.8	86637.6	108590	1.23389	8.7219e-08	3.7808e-07	0.35932	-1.4767	down	C12144
POS_6651	1-Hexadecanoyl-sn-glycero-3-phosphoethanolamine	Glycerophospholipids	Glycerophosphoethanolamines	722129	684839	732092	694822	705519	613555	2.608e+06	2.65137e+06	2.34516e+06	2.82677e+06	2.13762e+06	3.07691e+06	1.23879	7.2015e-08	3.1992e-07	0.26544	-1.9136	down	0
POS_6015	17(21)-Hopen-6-one	Prenol lipids	Hopanoids	146511	117751	168008	96800.3	119728	137584	49054.4	31964.2	62187.1	33572.2	54465.3	34177.4	1.18589	1.8928e-05	4.7468e-05	2.9628	1.567	up	0
POS_7148	4-[5-[[4-[5-[Acetyl(hydroxy)amino]pentylamino]-4-oxobutanoyl]-hydroxyamino]pentylamino]-4-oxobutanoic acid	Fatty Acyls	Fatty amides	136571	114050	146493	127869	113382	128241	414343	377993	314368	317392	259263	388272	1.19435	4.2693e-06	1.2136e-05	0.37005	-1.4342	down	0
POS_3969	Erucamide	Fatty Acyls	Fatty amides	6.63471e+07	4.23907e+07	7.05086e+07	5.89737e+07	5.43683e+07	5.85503e+07	1.37844e+08	1.38051e+08	1.13208e+08	1.16289e+08	9.72821e+07	1.37617e+08	1.17416	1.1077e-05	2.9073e-05	0.47433	-1.076	down	0
POS_4462	Glyceryl monooleate	Glycerolipids	Monoradylglycerols	2.7004e+06	2.39081e+06	2.28716e+06	1.94845e+06	605174	586118	7.7142e+06	7.36381e+06	7.38273e+06	8.0243e+06	2.75071e+06	7.35401e+06	1.10277	0.00022641	0.00046428	0.25913	-1.9482	down	0
POS_3304	h_61_17_Epioxandrolone	Steroids and steroid derivatives	Steroid lactones	76482.9	71584.4	71827	72388.1	70287.9	68007.9	171835	173692	90816.2	165787	157425	191878	1.12633	0.00012526	0.00027088	0.45256	-1.1438	down	0
POS_2897	Oleic acid	Fatty Acyls	Fatty acids and conjugates	379853	370409	373564	410998	402855	386026	1.03116e+06	1.03429e+06	979098	1.16043e+06	1.05471e+06	1.15878e+06	1.25677	8.162e-10	9.6533e-09	0.36203	-1.4658	down	C00712
POS_3265	(-)-Epitaxifolin	Flavonoids	Flavans	21925.4	17534.4	25527.8	19428.6	17323.4	17742	3082.2	3732.5	3057.68	2620.83	2777.44	3811.78	1.24045	2.0468e-07	7.9709e-07	6.2613	2.6465	up	0
POS_7252	(2R,3S,4S,5R,6R)-2-[[(2S,3R,4R)-3,4-dihydroxy-4-(hydroxymethyl)oxolan-2-yl]oxymethyl]-6-[4-(4-hydroxyphenyl)butan-2-yloxy]oxane-3,4,5-triol	Fatty Acyls	Fatty acyl glycosides	15420.4	12285.8	13710	12958.2	10724.3	8936.71	2671.38	2194.98	3500.37	4137.61	2525.56	3645.84	1.21209	2.7537e-06	8.189e-06	3.9643	1.9871	up	0
POS_3633	(2S,3S)-4-Methylidene-5-oxo-2-tridecyloxolane-3-carboxylic acid	Organoheterocyclic compounds	Gamma butyrolactones	23654.8	21419.3	24097	20926.3	20240	21082.9	60739.5	56505.9	46823	48934.9	47034	72702.3	1.17912	1.1699e-05	3.029e-05	0.39496	-1.3402	down	0
POS_6172	(2S)‐2‐(2‐aminoacetamido)‐3‐(4‐cyanophenyl)‐N‐(9H‐fluoren‐2‐yl)propanamide	Carboxylic acids and derivatives	Amino acids, peptides, and analogues	53779.4	40888.5	58987	46636.1	43855.7	50222.6	24396.5	26058.5	21837.8	23572.4	8643.63	27364.2	1.16369	3.883e-05	9.2535e-05	2.2322	1.1585	up	0
POS_3234	(3As,6S,7R,8aR)-8-hydroxy-6,8-dimethyl-3-methylidenespiro[4,5,6,8a-tetrahydro-3aH-cyclohepta[b]furan-7,5'-oxolane]-2,2'-dione	Prenol lipids	Terpene lactones	42674.9	32611.7	49492.8	37758.9	35702.6	34751.6	18020.6	17717.6	15445.6	16359.9	14630.8	18702	1.20141	7.8678e-06	2.1172e-05	2.3097	1.2077	up	0
POS_3331	(3S,6R,6As,7S)-6,6a,7,8-tetrahydroxy-3-methyl-3,4,5,6,7,12a-hexahydro-2H-benzo[a]anthracene-1,12-dione	Benzenoids		10352.5	9561.86	11115.2	10049.7	10210.7	10999.2	25559.6	26757.1	24409.7	23672.1	21888.3	26858.9	1.24718	7.3978e-09	5.0263e-08	0.41764	-1.2597	down	0
POS_5686	2-[(2Z)-5-(Hexopyranosyloxy)-2-penten-1-yl]-3-oxo-, (1R,2R)-cyclopentaneacetic acid	Fatty Acyls	Fatty acyl glycosides	37833.8	26311.3	38059.9	30728.5	24919.8	30962.4	10874.5	11384.7	9143.55	9108.53	8164.98	20949.9	1.15995	5.5845e-05	0.0001286	2.7119	1.4393	up	0
POS_9360	2-Methoxy-4-[tetrahydro-3a,6a-dihydroxy-4-(4-hydroxy-3-methoxyphenyl)-1H,3H-furo[3,4-c]furan-1-yl]phenyl-beta-D-glucopyranoside	Lignans, neolignans and related compounds		9987.69	10222.1	11872.6	11286.1	11019.8	11953.6	2292.52	4602.86	5283.12	2164.36	4790.51	1796.2	1.21758	1.0088e-06	3.3675e-06	3.1698	1.6644	up	0
POS_802	3-Hydroxyanthranilic acid	Benzenoids	Benzoic acids and derivatives	24785.6	8590.55	24198.1	20058.5	15847.1	15241.3	5541.16	11787.5	8775.72	7709.87	5298.03	8426.51	1.00003	0.0035816	0.0060944	2.287	1.1935	up	C00632
POS_3053	3alpha,17beta-Dihydroxy-5alpha-androstane	Steroids and steroid derivatives	Androstane steroids	18832.5	33481.7	24568.9	31052.8	23034.2	32229.1	13448.8	12884.4	9924.7	11941.9	8797.42	14425.9	1.10325	0.00013815	0.00029541	2.285	1.1922	up	0
POS_7253	4-(4-Hydroxyphenyl)-2-butanyl 6-O-[(4xi)-alpha-L-threo-pentofuranosyl]-beta-D-glucopyranoside	Fatty Acyls	Fatty acyl glycosides	31763.9	22854.2	25927.8	31450.8	23280	29633.6	2470.22	2612.07	2490.52	2451.55	2154.89	2384.38	1.24663	2.8648e-08	1.4294e-07	11.323	3.5012	up	0
POS_5034	4-Hydroxy-3-[(2E,6E)-4-hydroxy-3,7,11-trimethyldodeca-2,6,10-trienyl]benzoic acid	Prenol lipids	Sesquiterpenoids	2286.06	1722.68	2601	2481.18	2308.13	2255.18	20486.9	21946.8	19100.1	18134.3	15294.4	23791.6	1.23886	5.5407e-08	2.5519e-07	0.11498	-3.1206	down	0
POS_4983	9-Methoxycamptothecin	Alkaloids and derivatives		3262.09	5437.6	4883.69	4378.76	6924.65	5639.26	23473.6	29818.4	31005.6	18038.2	25970.2	26572.4	1.21311	1.0276e-06	3.3968e-06	0.1971	-2.343	down	0
POS_9576	Biliverdin	Others		10548.8	10917.3	12817.4	11463.5	9939.12	11930.8	3575.67	3955.63	2498.33	3054.9	2680.91	3952.27	1.24674	1.6821e-08	9.9475e-08	3.4292	1.7779	up	0
POS_5329	Brucine	Alkaloids and derivatives		24474.6	22265.3	21674.6	24743.7	21972.5	24370.9	7484.93	6603.05	10147.4	10286.7	8509.01	8526.46	1.24807	7.0309e-09	4.8808e-08	2.7057	1.436	up	0
POS_3622	Citalopram	Benzenoids	Phenylbutylamines	7984.66	6887.43	8386.95	7558.99	7107.25	7356.16	23720.4	22770.5	23864.6	22270.1	19099.8	25506	1.24461	1.1362e-08	7.2088e-08	0.32996	-1.5996	down	C07572
POS_8631	Cucurbitacin D	Steroids and steroid derivatives	Cucurbitacins	14202	7146.02	14029.9	12069.5	7071.55	6644.71	35214.7	40907.4	33592.4	32983.7	17285.2	24159.9	1.08809	0.00028725	0.00057692	0.33215	-1.5901	down	0
POS_5851	Cyanidin 3-arabinoside cation	Flavonoids	Flavonoid glycosides	15491.7	21551.7	30194.4	10622.1	17125.6	13034.7	1159.36	872.187	547.007	448.107	548.503	1911.19	1.12697	0.00014477	0.00030819	19.689	4.2993	up	0
POS_9957	Diadinoxanthin A	Prenol lipids	Triterpenoids	17614.6	17515.5	16542.7	16465.3	20124.6	15930.3	7358.51	7126.53	6961.48	7075.01	6242.53	7751.02	1.23686	1.9568e-08	1.0902e-07	2.4507	1.2932	up	0
POS_3412	Dihydroxyoctadecadienoic acid	Fatty Acyls	Lineolic acids and derivatives	5989.12	7472.61	10752.3	8854.08	5597.85	5109.54	36289.2	37149.4	36183.9	31524.6	33055	36633.8	1.25059	1.0127e-09	1.1152e-08	0.20763	-2.2679	down	0
POS_5734	Erysubin F	Isoflavonoids	Isoflav-2-enes	4600.74	2696.85	5032.53	3658.2	5053.87	3697.58	29960.8	26547.7	25618.3	24319.5	22768	28354.3	1.25011	2.8262e-09	2.5069e-08	0.15701	-2.6711	down	0
POS_895	Indole-3-acetaldehyde	Organoheterocyclic compounds	Indoles	9934.87	10572.7	11615.5	9377.81	10518.3	9389.18	4290.48	3946.09	2495.78	1628.95	2157.33	2260.27	1.23514	1.0822e-07	4.6077e-07	3.6599	1.8718	up	C00637
POS_8896	Isogomphrenin I	Organooxygen compounds	Carbohydrates and carbohydrate conjugates	5087.38	3752.29	6224.91	3779.06	3887.68	3800.61	21862.8	22106.1	19422.3	18452.5	17257	17338.1	1.23679	2.6934e-08	1.3509e-07	0.22786	-2.1338	down	0
POS_1357	Isoscopoletin	Others		47891.1	43286.7	54632.6	46717.6	46568.8	46232.1	22303.3	24545.7	19093.5	17174.6	17893.1	24128.8	1.23849	1.232e-07	5.1093e-07	2.2801	1.1891	up	0
POS_2950	Kaempferol	Flavonoids	Flavones	36950.7	34393	43395	33635.9	33688.7	33423.3	10435.2	11045.2	9438.59	8933.9	9468.63	11442.9	1.25018	2.2226e-08	1.1977e-07	3.5463	1.8263	up	C05903
POS_9366	Lyoniside	Lignans, neolignans and related compounds		18698.5	14545.1	20461	16627.9	12837.7	16925.5	7831.4	8935	7664	7216.77	6660.28	8994.67	1.18432	2.2391e-05	5.5428e-05	2.1161	1.0814	up	0
POS_4926	Marticin	Others		17468.6	15564.8	21820.3	15414	12738.3	15815.4	6651.22	7666.53	6011.06	5899.89	6139.15	7505.36	1.18905	1.653e-05	4.2006e-05	2.4784	1.3094	up	0
POS_5902	Morusin	Others		8294.77	7398.49	5980.29	6536.92	6543.86	5740.77	17172.4	16602.7	14559.2	15436.4	14867	17501.8	1.23859	4.6557e-08	2.1864e-07	0.42121	-1.2474	down	0
POS_265	N-Acetylimidazole	Organoheterocyclic compounds	Imidazoles	33895.1	42520.9	40935.9	35041.3	40684.7	33098	8859.93	8002.28	7736.2	9004.3	12485.8	9248.83	1.23918	2.3891e-08	1.2507e-07	4.0872	2.0311	up	0
POS_647	N-Methylisoleucine	Carboxylic acids and derivatives	Amino acids, peptides, and analogues	28389.7	26346.7	37830.6	24448.5	25555.8	26979	75439.1	76655.4	71853.6	63749.9	56792.6	81730	1.20546	1.4825e-06	4.6412e-06	0.3978	-1.3299	down	0
POS_4303	N(4)-Acetylsulfadimethoxine	Benzenoids	Benzenesulfonamides	15045.4	3137.99	10473.5	11725	5075.99	15411.3	25037.9	24185.5	21651.1	27416.6	27689.5	26376	1.13288	5.3198e-05	0.0001228	0.39952	-1.3237	down	0
POS_12053	Naadp	Nucleosides, nucleotides, and analogues		8887.7	8588.24	10423.1	9765.57	8152.53	8414.09	33839.7	37007.1	28698.6	28469.5	30146.7	34659.2	1.24049	2.4482e-08	1.2678e-07	0.28125	-1.8301	down	0
POS_7157	Petunidin 3-glucoside	Flavonoids	Flavonoid glycosides	4850.05	6612.52	6152.74	4284.58	5068.93	6437.79	20528.4	22803	20526.4	21218.4	19754	21914.2	1.25948	1.5584e-10	2.9273e-09	0.26357	-1.9237	down	C12139
POS_5099	Prazosin	Organoheterocyclic compounds	Piperazines	10066.2	9895.91	9901.25	9479.65	9878.99	11004.2	1411.19	1338.39	1014.91	859.513	805.564	229.969	1.26124	1.3707e-11	5.9686e-10	10.642	3.4116	up	C07368
POS_6460	Purpurein	Cinnamic acids and derivatives	Hydroxycinnamic acids and derivatives	17953.1	15141.7	17574.3	16689.3	14613.4	13417.3	3619.62	3209.56	2407.81	2398.33	2110.01	3531.52	1.25226	1.2186e-08	7.5809e-08	5.5212	2.465	up	0
POS_7271	Thalictricoside	Organooxygen compounds	Carbohydrates and carbohydrate conjugates	5281.57	4167.08	5434.28	5102.94	4257.98	4370.65	1150.38	1554.05	1226.74	971.054	1343.72	1375.98	1.24794	5.6182e-08	2.5752e-07	3.7542	1.9085	up	0
POS_3685	Tiapride	Benzenoids	Benzenesulfonyl compounds	8087.59	8259.24	12519.7	9223.87	8694.97	8924.8	4927.42	4950.64	4661.12	3436.34	3549.49	5596.1	1.14371	8.7312e-05	0.00019589	2.0541	1.0385	up	0
NEG_620	2,3-Dihydroxybenzoic acid	Benzenoids	Benzoic acids and derivatives	360607	283499	385875	355706	280674	321213	54258.3	57587.4	54107.1	52976.9	46528.1	65597	1.25115	2.6294e-08	1.3328e-07	6.0038	2.5859	up	C00196
NEG_908	4-Methoxysalicylic acid	Benzenoids	Benzoic acids and derivatives	1.54531e+06	1.43372e+06	1.3934e+06	1.53797e+06	1.52372e+06	1.58891e+06	332862	72410.2	271076	262804	270656	96772.1	1.2561	3.2268e-10	4.6139e-09	6.9058	2.7878	up	0
NEG_6754	Coatlin A	Linear 1,3-diarylpropanoids	Chalcones and dihydrochalcones	1.43977e+06	1.26476e+06	1.52378e+06	1.43305e+06	1.39852e+06	1.36856e+06	104597	110987	95656.7	114387	89689.3	128821	1.26546	5.8307e-12	2.7929e-10	13.085	3.7098	up	0
NEG_7051	Cyanidin 3-O-galactoside	Flavonoids	Flavonoid glycosides	7.18519e+06	5.74591e+06	7.31895e+06	6.10523e+06	4.47625e+06	2.14875e+06	286910	263132	175071	184518	132231	372604	1.15882	5.8584e-05	0.00013432	23.316	4.5433	up	C08647
NEG_7541	Isoquercitrin	Flavonoids	Flavonoid glycosides	6.46145e+06	6.14592e+06	6.01108e+06	7.05229e+06	6.68024e+06	6.73993e+06	1.01475e+06	1.12202e+06	1.00864e+06	1.19782e+06	959787	1.29681e+06	1.25836	1.9108e-11	7.0407e-10	5.923	2.5663	up	C05623
NEG_7611	Taxifolin-3-glucoside	Flavonoids	Flavonoid glycosides	2.02542e+06	1.61363e+06	1.77789e+06	1.69057e+06	1.43607e+06	1.65612e+06	133746	120681	113147	93719	107652	137939	1.25864	2.4239e-09	2.2148e-08	14.429	3.8509	up	0
NEG_3195	(2S,3S)-3,4',5,7-Tetrahydroxyflavanone	Flavonoids	Flavans	265174	219908	260626	247662	230062	240856	103990	106303	100804	119012	97734.7	121364	1.25149	1.282e-08	7.9238e-08	2.2555	1.1734	up	0
NEG_7059	Cyanidin 3-O-glucoside	Flavonoids	Flavonoid glycosides	587804	434015	553882	535579	429844	517302	119376	130900	114521	111073	100672	125772	1.24876	4.3027e-08	2.0507e-07	4.3548	2.1226	up	0
NEG_3683	FA 18:3;2O	Fatty Acyls	Fatty acids and conjugates	12716	11127.6	13100.2	11431.9	10293.9	9746.17	279800	222792	99183.2	92863.4	227020	278368	1.09687	0.00026563	0.00053799	0.057012	-4.1326	down	0
NEG_661	Histidine	Carboxylic acids and derivatives	Amino acids, peptides, and analogues	127402	155786	136508	158748	155342	161898	55267	48681	55254.5	63961.4	64023.2	46883.5	1.22967	4.5591e-08	2.1622e-07	2.6811	1.4228	up	C00135
NEG_824	Phenylalanine	Carboxylic acids and derivatives	Amino acids, peptides, and analogues	4.01566e+06	3.41263e+06	4.36299e+06	3.92404e+06	3.44693e+06	3.59769e+06	1.10571e+06	1.14167e+06	1.03963e+06	1.03458e+06	946397	1.14295e+06	1.25547	7.6801e-09	5.1094e-08	3.5502	1.8279	up	C00079
NEG_4085	FA 18:3;3O	Fatty Acyls	Fatty acids and conjugates	7909.82	5377.28	7977.75	6407.47	5970.02	8034.01	56454.8	56899.1	51527.3	50136.8	45786.3	61248	1.25183	2.0175e-09	1.9532e-08	0.12941	-2.95	down	0
NEG_11124	Luteolin-7,3'-di-O-gflucoside	Flavonoids	Flavonoid glycosides	67172.2	63926.7	57262.6	60616	49554.5	61931.8	19184.9	18359.1	16345.3	16013.3	14943	18459.4	1.24785	1.3687e-08	8.2988e-08	3.4893	1.8029	up	0
NEG_10269	(2-Hydroxy-3-octadec-9-enoyloxypropyl) 2-(trimethylazaniumyl)ethyl phosphate	Glycerophospholipids	Glycerophosphocholines	40007.1	60275.8	38254.9	44047.2	61688.7	43884.6	223952	232488	265070	301376	447943	239974	1.14683	4.6232e-05	0.00010802	0.16843	-2.5697	down	0
NEG_9630	1-Palmitoylphosphatidylcholine	Glycerophospholipids	Glycerophosphocholines	932577	903542	820376	811465	794962	721003	2.1668e+06	2.08921e+06	3.0693e+06	3.49564e+06	4.63693e+06	2.33321e+06	1.08012	0.00036253	0.00071906	0.28014	-1.8358	down	0
NEG_13266	PE 35:2	Others		12038.4	13464	15809.3	14243.7	11085.5	11547.8	63890.4	83462.9	81779.1	77094.4	61561.2	97942	1.22448	3.9618e-07	1.4109e-06	0.16788	-2.5745	down	0
NEG_8032	Phosphatidylcholine lyso 16:0	Glycerophospholipids	Glycerophosphocholines	196437	211896	178112	180460	157278	157347	488111	487666	727047	825518	1.22521e+06	519550	1.03045	0.001116	0.0020404	0.2531	-1.9822	down	0
NEG_8753	Phosphatidylcholine lyso 18:1	Glycerophospholipids	Glycerophosphocholines	4379.36	4451.92	3902.95	4333.64	4073.01	4572.51	37771.3	39093.3	64492.2	67429.5	81787.2	38517.4	1.13654	6.4149e-05	0.00014597	0.078135	-3.6779	down	0
NEG_475	Salicylic acid	Benzenoids	Benzoic acids and derivatives	19121.3	19948.6	20592.4	20704.7	17702.1	21417.4	47407.6	50513.6	48240.4	47866.6	44536	46653.8	1.25888	6.5287e-11	1.6037e-09	0.41893	-1.2552	down	C00805
NEG_5518	1-O-Sinapoyl-beta-D-glucose	Cinnamic acids and derivatives	Hydroxycinnamic acids and derivatives	229322	267663	274831	236324	239948	245954	35552.1	36608.8	37246.9	36640.7	33686.6	38291.8	1.25928	6.5164e-11	1.6037e-09	6.8526	2.7766	up	0
NEG_1048	2-Isopropylmalic acid	Fatty Acyls	Fatty acids and conjugates	2.41781e+06	1.90287e+06	2.60171e+06	2.45246e+06	1.93085e+06	1.97902e+06	1.07343e+06	1.17927e+06	970632	904568	754663	1.26236e+06	1.19276	1.103e-05	2.9029e-05	2.1619	1.1123	up	0
NEG_1229	3-Hydroxysuberic acid	Hydroxy acids and derivatives	Medium-chain hydroxy acids and derivatives	77960.5	71132.9	86082.6	83564.2	76143.5	68685.5	8674.32	11843.4	9615.19	8618.16	7335.24	8739.51	1.26024	3.5951e-10	4.9915e-09	8.4553	3.0799	up	0
NEG_7122	3,5-Dihydroxy-2-(4-hydroxyphenyl)-7-[3,4,5-trihydroxy-6-(hydroxymethyl)oxan-2-yl]oxy-2,3-dihydrochromen-4-one	Flavonoids	Flavonoid glycosides	874215	816650	791635	635952	573138	688169	143032	142174	133943	146138	126426	183930	1.23408	2.5959e-07	9.7525e-07	5.0018	2.3224	up	0
NEG_10900	3'-Galloylquercitrin	Flavonoids	Flavonoid glycosides	118646	86593.9	129555	106857	85598.5	112395	25348.6	14551.6	17067.4	25095.2	23018.3	19445	1.2354	4.0453e-07	1.43e-06	5.1366	2.3608	up	0
NEG_3122	6-Hydroxyapigenin	Flavonoids	Flavones	671502	1.21828e+06	694727	860495	789409	424084	49074.1	74472.7	52726.2	40751.4	68122.7	53793.2	1.13676	5.2818e-05	0.00012252	13.744	3.7808	up	C10184
NEG_3129	7,3',4',5'-Tetrahydroxyflavone	Flavonoids	Flavones	415035	1.24021e+06	355989	510572	834186	866585	4517.72	15418.2	13698.1	11053.9	75170.3	6084.52	1.04082	0.00060024	0.0011478	33.528	5.0673	up	0
NEG_195	Catechol	Phenols	Benzenediols	229268	185525	248260	224815	183888	206064	36608.6	37763.6	33156.3	33057.5	30502.4	39423.3	1.25444	1.1574e-08	7.2949e-08	6.0701	2.6017	up	C15571
NEG_3935	Dihydromyricetin	Flavonoids	Flavans	124372	112702	140169	124045	114515	119771	16458.5	17926	17279.4	15337.1	15032.2	17150.1	1.26343	1.5134e-10	2.9273e-09	7.4163	2.8907	up	0
NEG_7127	Flavanomarein	Flavonoids	Flavonoid glycosides	320607	248477	334679	302566	235973	270341	25450.1	25784	22374.9	21208.4	21715.5	26222.6	1.25329	1.8761e-08	1.0719e-07	11.997	3.5846	up	0
NEG_6686	Flavanone base + 3O, O-Hex	Flavonoids	Flavonoid glycosides	98902.2	74291.1	104954	89344.9	77364.3	85295.8	35932.8	35517.3	30042	33313.4	30952.7	39004.3	1.2288	8.5961e-07	2.8997e-06	2.5891	1.3725	up	0
NEG_10778	Kaempferol-3-Glucoside-3''-Rhamnoside	Flavonoids	Flavonoid glycosides	1.2612e+06	967524	1.23817e+06	1.18188e+06	906319	1.09553e+06	221951	235485	214066	199386	188275	236951	1.24973	3.8497e-08	1.8626e-07	5.1312	2.3593	up	0
NEG_2313	N-Phenylacetylaspartic acid	Carboxylic acids and derivatives	Amino acids, peptides, and analogues	81318.2	59752.2	100530	73066.2	62571.4	61235.4	2219.42	2729.65	2056.94	2063.57	2322.85	2887.3	1.23121	6.8704e-07	2.3423e-06	30.706	4.9404	up	0
NEG_2714	Phloretin	Linear 1,3-diarylpropanoids	Chalcones and dihydrochalcones	306626	244868	308308	293805	242299	279167	28711.8	29876.8	27449.7	27510.9	23298.5	30265.4	1.26013	1.4702e-09	1.5144e-08	10.024	3.3253	up	C00774
NEG_270	Pyrrolidine-2-carboxamide	Carboxylic acids and derivatives	Amino acids, peptides, and analogues	91652.8	83650.4	95326.7	93534	75625.1	87136.1	7052.65	7887.71	5282.63	6012.11	3996.34	9484.32	1.26267	1.5406e-10	2.9273e-09	13.267	3.7298	up	0
NEG_11429	Quercetin-3,4'-O-di-beta-glucoside	Others		137755	107942	121934	142120	118035	144894	23544.4	28759.2	30148	31004.5	20745.1	31230.8	1.24532	1.9573e-08	1.0902e-07	4.6707	2.2236	up	0
NEG_1887	Resveratrol	Stilbenes		167337	166221	144403	163643	157557	161135	17212.7	18002.7	16234.1	17093.3	12854.3	17598.2	1.26119	1.9398e-12	1.5486e-10	9.7004	3.278	up	C03582
NEG_10467	Rhoifolin	Flavonoids	Flavonoid glycosides	97138.1	83556.5	87577.9	92656.6	90408.8	102687	7034.39	6422.57	8060.88	6987.56	6402.39	6317.72	1.26104	3.389e-11	1.0681e-09	13.439	3.7483	up	0
NEG_10773	Tiliroside	Flavonoids	Flavonoid glycosides	88199.8	73715.3	84974.2	104225	57635.5	130990	27138.1	11776.9	9520.96	21680.5	9493.28	17703.5	1.1533	4.504e-05	0.00010576	5.5464	2.4716	up	0
NEG_6749	trans-piceid	Others		147510	146629	136720	146144	134563	141295	19777.5	21384	19625.9	20780.6	17565.3	20297.9	1.26472	1.4558e-13	2.1918e-11	7.141	2.8361	up	0
NEG_6751	Trilobatin	Others		325713	226942	356402	306331	223606	279334	26785.6	28538.6	23234	23183.5	19996.5	28906.8	1.23801	3.1311e-07	1.1493e-06	11.406	3.5118	up	0
NEG_3523	Morin	Flavonoids	Flavones	1.12884e+06	990944	1.11754e+06	1.11511e+06	1.02691e+06	1.12421e+06	408945	414096	384909	381575	342539	399465	1.26178	1.4675e-10	2.9273e-09	2.7894	1.48	up	C10105
NEG_7124	Eriodictyol-7-O-glucoside	Flavonoids	Flavonoid glycosides	55881.4	50000.6	64636.6	54085.6	55344.3	54026.4	8491.87	10427.5	8837.13	8857.41	8813.93	11200.2	1.25989	6.0989e-10	7.6878e-09	5.8977	2.5602	up	0
NEG_3467	Salicylic acid glucoside	Organooxygen compounds	Carbohydrates and carbohydrate conjugates	64711.4	74014.6	67066.4	69525.1	70161.2	68944.8	24637.5	25945	27276.4	27792.9	28672.3	28721.5	1.25486	5.2151e-11	1.4274e-09	2.5418	1.3458	up	0
NEG_13715	Cyanidin 3-(2G-glucosylrutinoside)	Others		50125.3	51562.9	44912.3	50361.6	45020.2	45867.8	18442.5	19033.4	16878.8	19228.1	16589	18657	1.25333	6.3523e-10	7.9033e-09	2.645	1.4033	up	0
NEG_1532	N-Acetyl-L-phenylalanine	Carboxylic acids and derivatives	Amino acids, peptides, and analogues	76526.2	44630.1	69865.8	58523.5	41890.5	53331.4	16713.5	15543.2	13877.2	14837.4	12603.3	16727	1.18836	2.031e-05	5.0668e-05	3.818	1.9328	up	C03519
NEG_11430	Quercetin 3-O-sophoroside	Flavonoids	Flavonoid glycosides	71254.3	69055.7	88740	81964.9	73350.7	77167.1	35770.1	37472.8	31707.5	32591.2	32492.7	38947.2	1.23602	1.4229e-07	5.8256e-07	2.2085	1.1431	up	0
NEG_3765	9-Hydroperoxyoctadeca-10,12-dienoic acid	Fatty Acyls	Lineolic acids and derivatives	388405	357798	384685	388768	340698	367712	1.08047e+06	1.15197e+06	1.0269e+06	1.07141e+06	1.00047e+06	1.16909e+06	1.25695	2.3217e-10	3.7698e-09	0.34276	-1.5447	down	0
NEG_3451	Demethylwedelolactone	Others		93588.1	94452.7	127023	129504	109850	232215	39762.3	40040	36685.7	33304.9	25029.7	41463.8	1.02907	0.0012179	0.0022055	3.637	1.8627	up	0
NEG_3317	Glutamylphenylalanine	Carboxylic acids and derivatives	Amino acids, peptides, and analogues	792497	598872	810565	728479	616521	690195	282161	247990	217842	238278	185679	288020	1.23515	3.4281e-07	1.244e-06	2.9022	1.5371	up	0
NEG_315	Succinic acid	Carboxylic acids and derivatives	Dicarboxylic acids and derivatives	1.00903e+06	721512	938006	1.25727e+06	1.02567e+06	1.10705e+06	406272	425473	432397	523503	426768	346086	1.17189	1.7952e-05	4.5377e-05	2.3662	1.2425	up	0
NEG_439	Thyminose	Organooxygen compounds	Carbonyl compounds	76914	76707.2	95083.3	102152	105957	104212	21409.1	14362.7	34522.9	41264.8	34225.2	23204.1	1.1982	2.496e-06	7.449e-06	3.3199	1.7311	up	0
NEG_7482	Kaempferol 3-glucuronide	Flavonoids	Flavonoid glycosides	84921.8	62810.2	83681.1	99423.7	38022.4	75183.8	17999.8	17844	16233	15942.7	14387.1	19325.4	1.15605	6.7108e-05	0.00015199	4.3648	2.1259	up	0
NEG_6753	Phlorizin	Flavonoids	Flavonoid glycosides	76055.7	59689.1	78533.3	77147.5	57160.1	68868.9	18953.1	19736.5	16845	16530.7	16341.8	20258.5	1.24348	1.0805e-07	4.6077e-07	3.8416	1.9417	up	C01604
NEG_4161	9,10-Dihydroxy-8-oxooctadec-12-enoic acid	Fatty Acyls	Lineolic acids and derivatives	44168.3	32422.2	45411.9	42570.6	35681.4	37868.7	85194.9	95161.9	82705.9	82064.5	65789.4	105979	1.17307	1.3938e-05	3.5512e-05	0.46068	-1.1182	down	0
NEG_5603	cis-Piceid	Stilbenes	Stilbene glycosides	71104.2	67023	65674.1	67399.5	64326.6	66088	11575.7	12880.2	11165.6	11303.1	9462.06	12215.5	1.26576	1.4964e-13	2.1918e-11	5.8543	2.5495	up	0
NEG_7928	Isorhamnetin-3-O-glucoside	Flavonoids	Flavonoid glycosides	65611.5	54334.8	70706.1	57856.1	48516.2	54903.3	4421.24	4895.6	3195.19	3830.6	3474.17	5378.96	1.25386	1.5367e-08	9.2591e-08	13.968	3.804	up	0
NEG_2863	Linoleic acid	Fatty Acyls	Lineolic acids and derivatives	477110	645935	624754	546362	690157	571843	888244	1.11092e+06	1.22069e+06	1.13576e+06	1.80998e+06	1.0814e+06	1.0446	0.00090655	0.0016798	0.49071	-1.0271	down	C01595
NEG_13570	PG 34:2	Others		2.15258e+06	2.57855e+06	2.37454e+06	1.98493e+06	1.61808e+06	1.49985e+06	677110	795375	883128	798327	622114	931982	1.16101	3.7187e-05	8.9064e-05	2.5931	1.3747	up	0
NEG_6982	Quercitrin	Flavonoids	Flavonoid glycosides	95212.6	81292.4	86059.1	89878.6	80763.5	99126.9	34985.6	32351.9	35446.1	30389.3	30621.8	37504.3	1.24916	1.0878e-08	6.994e-08	2.6445	1.403	up	C01750
NEG_7227	2-Azaniumylethyl (3-hexadecanoyloxy-2-hydroxypropyl) phosphate	Glycerophospholipids	Glycerophosphoethanolamines	524911	637894	424023	449878	486781	404064	1.3965e+06	1.40747e+06	2.12432e+06	2.47985e+06	3.90645e+06	1.65633e+06	1.01287	0.0016165	0.0028731	0.2257	-2.1475	down	0
NEG_4232	9,12,13-Trihydroxyoctadec-10-enoic acid	Fatty Acyls	Fatty acids and conjugates	32662.4	27579.2	34639	28556.1	29637.1	29499	108640	100240	91562.1	100370	77469.3	117473	1.22648	2.9754e-07	1.1048e-06	0.30646	-1.7062	down	0
NEG_2638	Apigenin	Flavonoids	Flavones	150490	124684	146660	149564	120206	143021	71121.6	68861.6	69296.2	68412.1	58915.2	73001.2	1.23643	2.3264e-07	8.8439e-07	2.0376	1.0269	up	C01477
NEG_5993	Astringin	Stilbenes	Stilbene glycosides	87739.3	93380.4	84348.9	100114	88403.5	91311.5	35888.1	35087.5	33967.3	36486.6	30329.3	37054.5	1.25066	5.7404e-10	7.4315e-09	2.6114	1.3848	up	C10245
NEG_530	D-Glutamine	Carboxylic acids and derivatives	Amino acids, peptides, and analogues	4.61644e+06	5.33009e+06	4.74776e+06	5.45898e+06	5.77356e+06	5.87283e+06	2.55598e+06	2.03966e+06	2.35755e+06	2.9739e+06	2.75575e+06	2.20531e+06	1.20658	6.456e-07	2.2328e-06	2.1359	1.0948	up	C00819
NEG_1055	Esculetin	Coumarins and derivatives	Hydroxycoumarins	142243	131262	176510	139669	156284	151240	61017.9	68027.7	56836.9	59272.5	54688.6	76609.7	1.22831	3.1575e-07	1.1545e-06	2.3833	1.253	up	C09263
NEG_3522	Taxifolin	Flavonoids	Flavans	82790.3	70178.6	80114.3	74053.9	67521.5	76084	27088	26534.8	24975.8	25499.7	22511.5	29160.2	1.25749	2.9088e-09	2.5485e-08	2.8936	1.5329	up	0
NEG_6682	Avicularin	Flavonoids	Flavonoid glycosides	43783.8	52049.1	117060	48176.4	95185.4	57356	12967.1	3512.92	12310.7	12468.5	13441.8	12962	1.05436	0.00087256	0.0016231	6.1128	2.6118	up	0
NEG_8680	Phosphatidylcholine lyso 18:2	Glycerophospholipids	Glycerophosphocholines	37681.7	50757.6	33402.3	39478.8	53211.6	44778.6	76536	74163.6	114408	121374	140019	72844.8	1.04733	0.00095603	0.0017647	0.43266	-1.2087	down	0
NEG_5852	Scopolin	Coumarins and derivatives	Coumarin glycosides	68405.9	54430.4	71536.3	70697	62056.2	58916.2	31460.8	27078.9	32288.9	28956.7	26597.3	29773.6	1.23352	3.6765e-07	1.3241e-06	2.1915	1.1319	up	0
NEG_7426	(-)-Podophyllotoxin	Others		12262.4	9650.28	12249.9	11115.8	8950.22	10474.8	4933.39	5027.27	3759.79	5108.78	4586.86	5343.21	1.22152	1.5955e-06	4.9788e-06	2.2498	1.1698	up	0
NEG_5006	(3R,8R)-10-[(2R,5R)-3,5-Dihydroxy-6-methyloxan-2-yl]oxy-3,8-dihydroxyundecanoic acid	Organooxygen compounds	Carbohydrates and carbohydrate conjugates	367.934	211.034	378.552	487.59	229.155	319.29	1713.12	1541.09	2289.76	2279.82	1988.22	1260.06	1.18524	5.7439e-06	1.5858e-05	0.18005	-2.4735	down	0
NEG_10119	[2-Hydroxy-3-[3,4,5-trihydroxy-6-(hydroxymethyl)oxan-2-yl]oxypropyl] octadeca-9,12-dienoate	Glycerolipids	Glycosylglycerols	6591.82	8620.18	6201.44	6394.3	8019.2	7285.2	20464.4	20379.1	31075.5	33370.6	39859.4	20831.2	1.11858	0.00013177	0.00028368	0.25974	-1.9448	down	0
NEG_14415	[3,4-Dihydroxy-6-[5-hydroxy-2-(4-hydroxyphenyl)-4-oxo-7-[3,4,5-trihydroxy-6-(hydroxymethyl)oxan-2-yl]oxychromen-3-yl]oxy-5-[(2S,3R,4R,5R,6S)-3,4,5-trihydroxy-6-methyloxan-2-yl]oxyoxan-2-yl]methyl acetate	Flavonoids	Flavonoid glycosides	21831.5	18544.5	26806.4	22410.8	20783	26298.1	2627.73	1762.72	1782.44	2241.81	1910.25	2598.1	1.24737	2.3732e-08	1.2507e-07	10.576	3.4027	up	0
NEG_10178	2-Oahsa	Fatty Acyls	Fatty acids and conjugates	8228.09	11011.8	6940.25	7041.23	10937.4	11923	17958.4	15742.4	22244.1	23423.2	16044.1	24026.1	1.13265	0.00014526	0.00030855	0.46955	-1.0907	down	0
NEG_476	2,5-Dihydroxybenzaldehyde	Organooxygen compounds	Carbonyl compounds	14872.3	2608.84	11211.9	6852.15	7626.82	10388.2	44927.2	49920.1	46524.4	45291.3	42842.9	46683.5	1.24362	3.8418e-09	2.9922e-08	0.19393	-2.3664	down	C05585
NEG_9169	3-[[2,3-Dihydro-2-(4-hydroxy-3-methoxyphenyl)-3-(hydroxymethyl)-7-methoxybenzofuran]-5-yl]propyl beta-D-glucopyranoside	Flavonoids		6864.15	6565.9	7689.88	6453.62	6754.16	6060.43	20073.5	20331.1	18648.3	21417.2	18929.1	21732.1	1.25647	3.4827e-10	4.9065e-09	0.33342	-1.5846	down	0
NEG_1194	3-Phosphoglycerate	Organooxygen compounds	Carbohydrates and carbohydrate conjugates	17699	19419.7	19004.4	20818.1	21410	20928.3	9986.71	7454.36	10068.7	9598.57	12983.1	9347.26	1.21057	8.3851e-07	2.8385e-06	2.0068	1.0049	up	C00597
NEG_1060	4-Methoxycinnamic acid	Cinnamic acids and derivatives	Cinnamic acids	12124.7	10781.8	13045.6	11529.6	11234.5	11443.5	3648.79	3480.84	3107.77	2996.03	2006.38	2961.13	1.2587	9.7864e-10	1.1096e-08	3.8547	1.9466	up	0
NEG_11127	5-Hydroxy-2-(3-hydroxy-4-methoxyphenyl)-7-[(2S,3R,4S,5S,6R)-3,4,5-trihydroxy-6-[[(2R,3R,4R,5R,6S)-3,4,5-trihydroxy-6-methyloxan-2-yl]oxymethyl]oxan-2-yl]oxy-2,3-dihydrochromen-4-one	Flavonoids	Flavonoid glycosides	31685.5	38969.7	40900.2	25222	20737.2	31321.2	4141.03	5715	4129.86	2934.07	5989.21	9317.38	1.1859	1.2634e-05	3.245e-05	5.8596	2.5508	up	0
NEG_13452	Apigenin 7-O-(2G-rhamnosyl)gentiobioside	Others		24223.4	19877.9	22002.9	22337.5	16502.4	21236.3	5342.18	5532.9	4787.68	4809.96	5120.17	5058.05	1.24817	4.2211e-08	2.0219e-07	4.1167	2.0415	up	0
NEG_2640	Baicalein	Flavonoids	Flavones	9390.06	9605.21	9568.01	10859.9	10285.3	9608.35	2807.29	2673.19	2915.11	2630.25	2347.06	2425.49	1.25715	5.1267e-11	1.4274e-09	3.7546	1.9087	up	C10023
NEG_4403	Bavachalcone	Others		21551.3	13413.3	21752.6	18971.6	14262.3	18179.6	4905.45	6557.81	6517.8	4427.33	3350.72	5095.61	1.20331	7.5764e-06	2.0503e-05	3.5045	1.8092	up	0
NEG_7354	Betulinic acid	Prenol lipids	Triterpenoids	24660.7	26215.4	23209	20620.4	19587.7	20101.4	10430.7	11477.8	11309	11016.3	8904.6	11832.8	1.20854	2.0013e-06	6.106e-06	2.0685	1.0486	up	0
NEG_844	Caffeyl alcohol	Cinnamic acids and derivativess		7942.36	6177.34	7162.09	7295.81	6622.11	6577.4	20625.8	20169.3	18051.1	18437.6	16324.2	19336.6	1.24465	9.4523e-09	6.1601e-08	0.36989	-1.4348	down	0
NEG_6616	Cosmosiin	Flavonoids	Flavonoid glycosides	34450.4	34092.5	30186.3	37305	32128	36794.2	7282.91	6680.41	6632.06	7049.28	6962	6986.29	1.25441	2.9598e-10	4.5008e-09	4.9277	2.3009	up	C04608
NEG_4052	Coumaric acid 4-O-glucoside	Organooxygen compounds	Carbohydrates and carbohydrate conjugates	3826.36	4674.99	4128.11	5095.99	4504.05	3878.45	32518.1	34767.3	31194.8	28291.7	28049.3	32796.4	1.25751	3.084e-10	4.5454e-09	0.13916	-2.8452	down	0
NEG_7055	Cynaroside	Others		57608.7	58790.2	29630.6	36926.9	58248.2	35080.7	7762.51	17168.5	21059.4	7709.66	5217.17	4356.79	1.09985	0.00019234	0.00039797	4.3665	2.1265	up	0
NEG_5086	Dehydroepiandrosterone sulfate	Steroids and steroid derivatives	Sulfated steroids	470.467	1715.53	716.016	814.352	1667.09	1972.33	33146.9	33970.4	28415.9	31031.8	27608.3	44313	1.23433	1.5506e-07	6.2945e-07	0.037059	-4.754	down	C04555
NEG_7777	Echinocystic acid	Prenol lipids	Triterpenoids	27225.7	29098.9	21522.6	26825.1	24232.7	27659.8	6191.33	5062.92	5607.26	6774.63	5661.94	4892.98	1.24278	7.3114e-09	5.0031e-08	4.5791	2.1951	up	0
NEG_3596	FA 20:3	Fatty Acyls	Fatty acids and conjugates	51945.2	73685.7	51213.1	54643.8	65624	61526.6	26644.3	23171.5	30139.2	30358.1	31763.4	28124.1	1.16584	9.5083e-06	2.5233e-05	2.1072	1.0753	up	0
NEG_6912	FA 30:5	Fatty Acyls	Fatty acids and conjugates	20863	20213.7	21890.7	20353.1	16503.2	16929.9	3758.42	3882.39	5331.71	4043.65	2741.39	4181.1	1.25008	1.8163e-08	1.0546e-07	4.8772	2.2861	up	0
NEG_3037	Genkwanin	Flavonoids	O-methylated flavonoids	16447.6	15381.7	15269.9	16723.8	15270.2	17053.6	2639.6	4156.13	1892.91	3910.19	2007.23	2441.06	1.25652	1.8874e-10	3.2881e-09	5.6401	2.4957	up	C10046
NEG_14873	Ginsenoside F2	Others		6853.63	5816.59	7299.64	5716.13	5598.77	4071.67	2637.06	3117.78	3354.5	2789.82	1339.63	3549.14	1.11103	0.00025893	0.00052553	2.1061	1.0745	up	0
NEG_14460	Ginsenoside Rf	Others		8582.33	8994.2	10991.7	8179.49	6635.64	6738.97	24957.1	28844.9	26527.8	29979.9	24583.4	33054.4	1.23156	1.1775e-07	4.9559e-07	0.29844	-1.7445	down	0
NEG_13896	Ginsenoside Rg5	Others		7602.48	13317.5	15126.1	9287.27	10923.1	7664.7	26660.2	28773.8	25013.8	31040.6	39682.1	35398.4	1.17449	1.3352e-05	3.4202e-05	0.34261	-1.5453	down	0
NEG_15045	Ginsenoside-Rg1	Others		311.306	128.61	0	234.606	134.955	314.277	869.51	1118.03	1037.31	2015.96	1759.46	1133.65	1.11763	0.00015097	0.00031857	0.14488	-2.7871	down	0
NEG_337	Hydron;benzoate	Benzenoids	Benzoic acids and derivatives	13827.1	13690.9	12644.5	10496.2	9606.02	8519.49	36627.1	34140.3	29252.9	33345.6	28751.6	37041.3	1.22887	1.7063e-07	6.811e-07	0.34537	-1.5338	down	0
NEG_627	Hydroxytyrosol	Phenols	Tyrosols and derivatives	19899.7	15951.9	17987.8	19842.3	17705.3	18541.6	8568.7	8726.83	8202.68	8288.32	7474.08	8879.41	1.24632	2.3781e-08	1.2507e-07	2.1924	1.1325	up	0
NEG_9365	Kukoamine B	Others		8500.65	6920.5	7978.63	7942.11	6238.66	8375.72	21453	19498.1	21125.2	21837.8	18043.4	19969.6	1.24628	4.8045e-09	3.568e-08	0.37692	-1.4077	down	0
NEG_5570	Laricin	Organooxygen compounds	Carbohydrates and carbohydrate conjugates	14553.6	14244.8	18209.5	14738.9	12498.4	19314	36565.2	32760.5	31953.4	32347.9	31428.7	39390.8	1.21548	6.5517e-07	2.2577e-06	0.45762	-1.1278	down	0
NEG_6269	Liquiritin	Others		20843.3	15942.7	20685	20372.7	15126.6	17798.8	4605.82	5372.82	4707.07	5045.53	4211.65	4372.09	1.24289	1.291e-07	5.3311e-07	3.912	1.9679	up	0
NEG_7980	Myricetin-3-Galactoside	Flavonoids	Flavonoid glycosides	19585.4	12413.6	20680	17383.9	14803.2	19494.8	4625.98	6083.5	5274.37	4937.09	4305.9	6479.1	1.20823	4.4188e-06	1.2451e-05	3.2915	1.7188	up	0
NEG_7981	Myricetin-3-O-galactoside	Flavonoids	Flavonoid glycosides	36890	24892.2	48864.5	34143.1	28267.6	31708.9	8513.28	8425.28	6821.63	7705.72	5004.23	11774.5	1.18182	2.3851e-05	5.8737e-05	4.2443	2.0855	up	0
NEG_3966	Neobavaisoflavone	Isoflavonoids	Isoflav-2-enes	6605.92	7862.19	6008.26	8095.24	7878.86	8489.85	17729	15407	20620.2	22117.2	20927.8	13001.5	1.16103	3.0442e-05	7.4019e-05	0.40928	-1.2888	down	0
NEG_4090	Nephromopsic acid	Organoheterocyclic compounds	Gamma butyrolactones	10244.5	10580	9571.3	12385.4	10828	10554.5	24792.7	22808.5	25887.1	27757.4	24110.7	25415.2	1.25187	4.8549e-09	3.5777e-08	0.42557	-1.2325	down	0
NEG_2636	Nordazepam	Organoheterocyclic compounds	1,4-benzodiazepines	8409.23	8264.83	8077.82	7938.58	8910.03	8272.14	585.397	469.862	502.98	312.484	217.976	695.585	1.26266	2.1508e-13	2.5755e-11	17.912	4.1629	up	C07486
NEG_14071	PG 36:2	Others		25730.1	25801.8	30822.3	25672.7	21649.3	19212	9792.09	12428	15903.7	10868.5	7717.91	11300.3	1.16118	4.7264e-05	0.0001099	2.1892	1.1304	up	0
NEG_14023	PG 36:3	Others		8803.88	11366.7	12399.9	9178.84	9276.93	6205.48	1845.16	2553.34	1811.24	2438.35	2017.75	3027.9	1.18231	1.1427e-05	2.9667e-05	4.1794	2.0633	up	0
NEG_13971	PG 36:4	Others		6325.05	6279.64	6635.28	6514.35	5457.83	5513.79	2347.93	2526.64	2081.2	2672.33	2224.89	3151.19	1.23968	7.0521e-08	3.1718e-07	2.4477	1.2914	up	0
NEG_13713	Quercetin 3-O-[2''-O-(6'''-O-p-coumaroyl)-b-D-glucopyranosyl]-a-L-rhamnopyranoside	Others		28681.7	28289.3	29548.4	25403.1	26278.6	24203.3	5820.88	5221.5	2881.54	3832.83	3531.19	6462.05	1.25653	9.3412e-10	1.0913e-08	5.8524	2.549	up	0
NEG_11423	Quercetin 3,4'-diglucoside	Flavonoids	Flavonoid glycosides	34177.2	24049.1	29555.4	18654.3	30627.2	33213.9	3296.17	4356.47	4618.69	4204.42	4003.32	4796.91	1.21167	1.716e-06	5.3201e-06	6.7367	2.752	up	0
NEG_11809	Quercetin 5-Glc-Rha	Flavonoids	Flavonoid glycosides	37041.6	24228.9	32911.1	30217.1	6744.05	40932.1	1689.2	2247.32	1790.43	1803.73	1792.37	2144.07	1.11051	0.00030833	0.00061666	15.006	3.9075	up	C17563
NEG_2350	Rubiadin	Benzenoids	Anthraquinones	8653.88	6122.09	6449.05	8901.58	4937.86	7504.8	1934	2127.22	2279.89	2301.35	1580.21	2140.81	1.18545	1.3428e-05	3.4305e-05	3.4431	1.7837	up	0
NEG_14814	Saikosaponin b2	Others		430.891	123.188	579.66	238.626	208.952	99.2779	1340.97	1029.19	2350.6	2230.98	2911.01	2003.23	1.10249	0.00016944	0.00035288	0.14163	-2.8198	up	0
NEG_349	Salicyl alcohol	Benzenoids	Benzyl alcohols	682.511	565.71	650.902	332.449	622.698	745.192	24412.6	23764.9	20833.6	18899.3	18075.8	23565.1	1.25048	3.6577e-09	2.9177e-08	0.027784	-5.1696	up	C02323
NEG_1260	Scopoletin	Coumarins and derivatives	Hydroxycoumarins	60696.5	56804.8	72516.4	73098.6	59483.8	57648.8	29837	34208.2	36812.6	26081.1	26464.2	28313.5	1.20999	2.761e-06	8.189e-06	2.0925	1.0653	down	C01752
NEG_1812	Sinapic acid	Cinnamic acids and derivatives	Hydroxycinnamic acids and derivatives	36438.4	25536.5	35068	30106.7	32200.2	33074.7	14257.2	17037.4	15537.8	13570.2	14620.8	19564.3	1.20511	4.4618e-06	1.2535e-05	2.0343	1.0246	down	C00482
NEG_7537	Spiraeoside	Flavonoids	Flavonoid glycosides	41817.6	38901.1	49879.8	42454.7	36148.8	33761.7	8920.18	10121	8115.4	9873.05	9420.37	10008	1.24205	1.0901e-07	4.6209e-07	4.3034	2.1055	down	0
NEG_12189	Syrosingopine	Alkaloids and derivatives		14322.7	12484.1	15938.8	13362.9	13074.4	13578.2	5809.08	5133.62	4469.5	5043.03	5697.14	5915.32	1.25013	2.549e-08	1.3032e-07	2.5808	1.3678	down	0
NEG_588	Vanillin	Phenols	Methoxyphenols	14668.2	13866.6	15863.5	13674.5	12569.8	14324.8	4935.8	4658.09	6118.65	5696.48	4518.51	5900.39	1.25166	1.2013e-08	7.5216e-08	2.6696	1.4166	down	C00755
NEG_1358	Vanillylmandelic acid	Phenols	Methoxyphenols	12185.2	15117.6	12646.2	13914.1	15198	14632.5	6694.48	6275.91	6479.53	6864.6	6867.9	6173.23	1.22273	7.9538e-08	3.4793e-07	2.1266	1.0885	down	C05584

## Sheet: KD VS DB
ID	Name	Class	Subclass	KD-1	KD-2	KD-3	KD-4	KD-5	KD-6	DB-1	DB-2	DB-3	DB-4	DB-5	DB-6	VIP	P_value	FDR	Fold Change	log2(FC)	Type	KEGG
POS_6964	Sucrose 6-benzoate	Organooxygen compounds	Carbohydrates and carbohydrate conjugates	12570.8	13161.5	13044.2	13436.4	13526.9	13541.9	2787.67	2030.44	1605.83	2367.33	2166.15	2235.27	1.37968	8.8664e-13	2.8313e-10	6.06796	2.60121	up	0
POS_8705	(2R,3E)-4-[(1S,6R)-1-Hydroxy-2,2,6-trimethyl-4-oxocyclohexyl]-3-buten-2-yl 6-O-beta-D-xylopyranosyl-beta-D-glucopyranoside	Fatty Acyls	Fatty acyl glycosides	1.21238e+06	1.12347e+06	1.02698e+06	1.21332e+06	1.03119e+06	1.29708e+06	66055.6	51527.9	56419.7	60952.6	57595.4	55992.9	1.37305	2.8363e-09	7.9917e-08	19.5971	4.29257	up	0
POS_7328	(1R,2S,4R,5R)-5-Hydroxy-1,7,7-trimethylbicyclo[2.2.1]hept-2-yl 6-O-[(2R,3R,4R)-tetrahydro-3,4-dihydroxy-4-(hydroxymethyl)-2-furanyl]-beta-D-glucopyranoside	Prenol lipids	Terpene glycosides	588190	521872	501366	539790	548247	657400	30171.1	31996.7	32950.1	31367.1	35942.1	30003.2	1.37264	5.2536e-09	1.1704e-07	17.2655	4.10982	up	0
POS_6325	Phenethyl 2-O-(beta-D-xylopyranosyl)-beta-D-glucopyranoside	Organooxygen compounds	Carbohydrates and carbohydrate conjugates	1.49246e+06	1.35709e+06	1.32666e+06	1.47097e+06	1.27117e+06	1.53086e+06	432509	376529	400103	419367	393486	420634	1.37124	3.4493e-09	8.6958e-08	3.41763	1.773	up	0
POS_3096	Methyl linoleate	Others	0	1.74086e+06	1.48032e+06	1.32576e+06	1.53979e+06	1.33102e+06	1.52742e+06	599604	602329	649647	636738	654964	634952	1.36651	1.7589e-08	2.9052e-07	2.28817	1.1942	up	0
NEG_6571	5-{[4-(beta-D-Glucopyranosyloxy)benzyl]oxy}-3-hydroxy-3-methyl-5-oxopentanoic acid	Organooxygen compounds	Carbohydrates and carbohydrate conjugates	75917.8	86347.1	71775.9	74752.6	64879.2	131846	25580	22135.6	24995	26615.5	25869.6	24779	1.2363	0.00032757	0.00087904	3.43737	1.78131	up	0
NEG_5563	Lactose	Others	0	1.51973e+07	2.98951e+07	1.82339e+07	1.63641e+07	1.45893e+07	1.52376e+07	3.06547e+07	3.68476e+07	5.94761e+07	2.87043e+07	4.01222e+07	3.62072e+07	1.04994	0.0063017	0.012683	0.487829	-1.03555	down	0
NEG_4520	Trehalose	Organooxygen compounds	Carbohydrates and carbohydrate conjugates	1.75031e+07	3.35877e+07	2.16492e+07	1.9495e+07	1.70612e+07	1.79641e+07	3.61143e+07	4.20221e+07	6.97087e+07	3.94609e+07	4.74479e+07	3.81872e+07	1.07548	0.0044763	0.0092222	0.482556	-1.05123	down	C01083
NEG_5891	Benzyl alcohol + Hex-Pen	Organooxygen compounds	Carbohydrates and carbohydrate conjugates	1.03649e+06	940834	857508	1.12345e+06	855664	1.16989e+06	53747.6	44027.5	45764.9	51020	45688	47416.5	1.36014	7.5784e-08	8.0667e-07	20.6381	4.36724	up	0
NEG_7610	(2S,3S)-3,5,7-Trihydroxy-2-[4-hydroxy-3-[(2S,3R,4S,5S,6R)-3,4,5-trihydroxy-6-(hydroxymethyl)oxan-2-yl]oxyphenyl]-2,3-dihydrochromen-4-one	Flavonoids	Flavonoid glycosides	1.32354e+06	1.22984e+06	1.14023e+06	1.36845e+06	1.08791e+06	1.49435e+06	159357	136558	139030	149715	141487	145759	1.36363	4.7207e-08	5.798e-07	8.69943	3.12092	up	0
NEG_6752	Dihydrostilbene base + 3O, 1carboxy, O-Hex	Stilbenes	Stilbene glycosides	233335	196327	164408	226894	157189	234331	3465.78	3989.85	4271.44	3611.26	4474.78	4829.58	1.35303	2.7556e-07	2.0151e-06	47.6804	5.57532	up	0
NEG_9816	Flavonol base + 4O, O-MalonylHex	Flavonoids	Flavonoid glycosides	742294	766037	735465	965807	595922	1.21043e+06	271931	209919	226511	249181	218501	240036	1.25922	0.00012752	0.0003736	3.62148	1.85658	up	C12638
NEG_7061	Kaempferol 7-O-glucoside	Flavonoids	Flavonoid glycosides	73890.1	49368.2	51517.6	71759.5	52441.6	75952.1	18228.3	17421.7	16306.9	18602.8	14795.7	14913.2	1.3055	1.4058e-05	5.5652e-05	3.60282	1.84913	up	0
NEG_7046	Maritimein	Flavonoids	Flavonoid glycosides	268895	219659	224314	246198	221300	240346	34004	31000.2	35242.4	32128.4	31682.1	31110.1	1.37782	1.8709e-11	2.5605e-09	7.08215	2.82419	up	0
NEG_8701	Quercetin-3-O-glucosyl-6''-acetate	Flavonoids	Flavonoid glycosides	4.79546e+06	4.8002e+06	4.82423e+06	6.46362e+06	4.30904e+06	7.36859e+06	1.63944e+06	1.28751e+06	1.50512e+06	1.58199e+06	1.48277e+06	1.46589e+06	1.29212	3.0377e-05	0.00010859	3.71747	1.89432	up	0
NEG_8643	Melezitose	Organooxygen compounds	Carbohydrates and carbohydrate conjugates	923860	1.55014e+06	861104	1.00766e+06	720310	966002	2.33279e+06	2.25423e+06	3.75141e+06	2.47416e+06	2.6989e+06	2.04851e+06	1.19349	0.00056522	0.0014174	0.393716	-1.34477	down	C08243
NEG_9829	Raffinose	Organooxygen compounds	Carbohydrates and carbohydrate conjugates	1.85683e+06	3.42796e+06	1.81523e+06	2.20701e+06	1.48633e+06	2.18753e+06	4.91484e+06	4.74279e+06	7.731e+06	5.22857e+06	5.81228e+06	4.3366e+06	1.19158	0.0005774	0.0014405	0.407398	-1.29549	down	C00492
NEG_8971	3,5-Dicaffeoylquinic acids	Organooxygen compounds	Alcohols and polyols	187638	279559	287531	321989	265944	385661	169021	142157	141717	140256	145337	137650	1.30213	2.0515e-05	7.6474e-05	2.11019	1.07738	up	0
POS_6508	Luteolin 7-galactoside	Flavonoids	Flavonoid glycosides	2.29637e+07	2.9542e+07	1.134e+07	3.14924e+07	4.23569e+07	2.88929e+07	10914.6	12481.2	7462.87	5408.09	6557.14	2003.49	1.25007	0.00012741	0.0003736	3844.68	11.9086	up	0
POS_6506	Plantaginin	Flavonoids	Flavonoid glycosides	1.90741e+07	1.60453e+07	1.84261e+07	1.11522e+07	2.10864e+06	2.1028e+07	8947.2	7022.84	5788.44	5669.63	4908.51	7915.63	1.17082	0.0013533	0.0030795	2049.89	11.0013	up	0
POS_2946	Fisetin	Flavonoids	Flavones	542582	624206	255273	314789	359214	446207	1134.09	1294.59	1204.98	1120.17	1120	1490.2	1.28051	7.1724e-05	0.00022981	325.86	8.34811	up	C10041
POS_3227	Quercetin	Flavonoids	Flavones	793553	651722	629512	799701	618026	868811	111194	86632.2	102260	93624.6	99045.7	94928	1.35147	3.0134e-07	2.1615e-06	7.28491	2.86491	up	C00389
POS_8894	Quercetin 3-O-malonylglucoside	Flavonoids	Flavonoid glycosides	396516	335837	323342	402212	334895	445350	177030	145761	154512	151772	150856	159321	1.3224	4.908e-06	2.239e-05	2.35289	1.23443	up	0
NEG_908	4-Methoxysalicylic acid	Benzenoids	Benzoic acids and derivatives	1.00488e+06	803561	796161	1.07729e+06	761355	504767	5086.62	28618.9	29385.3	33092	29799.5	26755.6	1.30438	6.5497e-06	2.8915e-05	30.9799	4.95326	up	0
NEG_6754	Coatlin A	Linear 1,3-diarylpropanoids	Chalcones and dihydrochalcones	992310	987175	801868	1.04992e+06	859412	1.15487e+06	44360.3	36575.8	39855	43345	38159.6	37093.4	1.36331	5.8926e-08	6.7418e-07	24.3279	4.60454	up	0
NEG_7051	Cyanidin 3-O-galactoside	Flavonoids	Flavonoid glycosides	2.43515e+06	3.58644e+06	3.29871e+06	4.90848e+06	1.11927e+06	1.44592e+06	3397.98	3944.96	2200.13	2749.2	8882.56	7886.18	1.13959	0.0014807	0.0033376	592.909	9.21167	up	C08647
NEG_7541	Isoquercitrin	Flavonoids	Flavonoid glycosides	5.60256e+06	5.5264e+06	5.32969e+06	5.52083e+06	5.35676e+06	5.82287e+06	2.4843e+06	2.29653e+06	2.45056e+06	2.46553e+06	2.24628e+06	2.22637e+06	1.37877	1.0659e-10	7.2941e-09	2.33372	1.22263	up	C05623
NEG_7611	Taxifolin-3-glucoside	Flavonoids	Flavonoid glycosides	1.77029e+06	1.52486e+06	1.41679e+06	1.9864e+06	1.31194e+06	2.05784e+06	298564	233387	252653	276177	248185	264876	1.32817	3.1851e-06	1.5893e-05	6.32671	2.66146	up	0
NEG_1048	2-Isopropylmalic acid	Fatty Acyls	Fatty acids and conjugates	2.05638e+06	2.40545e+06	2.33811e+06	2.85313e+06	2.10459e+06	3.15793e+06	882950	670780	778967	801842	765930	807207	1.32983	2.9259e-06	1.4831e-05	3.27783	1.71274	up	0
NEG_7122	3,5-Dihydroxy-2-(4-hydroxyphenyl)-7-[3,4,5-trihydroxy-6-(hydroxymethyl)oxan-2-yl]oxy-2,3-dihydrochromen-4-one	Flavonoids	Flavonoid glycosides	774014	461880	690409	396630	726288	973482	147815	105827	126923	141135	129162	133433	1.22742	0.00034505	0.00092078	4.97067	2.31344	up	0
NEG_3122	6-Hydroxyapigenin	Flavonoids	Flavones	315302	226376	236013	394693	402259	872712	25670.7	22376.6	19646.7	22854.8	21235.5	10681.9	1.10189	0.0040859	0.0085279	20.8912	4.38482	up	C10184
NEG_3129	7,3',4',5'-Tetrahydroxyflavone	Flavonoids	Flavones	207169	382254	122448	194731	636725	301561	897.446	1384.01	562.243	682.031	509.384	627.479	1.11416	0.0028401	0.0060732	421.496	8.71938	up	0
NEG_10778	Kaempferol-3-Glucoside-3''-Rhamnoside	Flavonoids	Flavonoid glycosides	1.52182e+06	1.34526e+06	1.24668e+06	1.6639e+06	1.12943e+06	1.84112e+06	463325	358944	408832	412135	417722	420390	1.30822	1.3235e-05	5.305e-05	3.49479	1.80521	up	0
NEG_3523	Morin	Flavonoids	Flavones	2.24855e+06	1.12878e+06	1.09175e+06	1.28377e+06	1.06064e+06	1.22356e+06	581763	559064	554176	564302	545140	565918	1.35729	7.8066e-08	8.2183e-07	2.06096	1.04332	up	C10105
POS_9778	Quercetin 3,7-dirhamnoside	Flavonoids	Flavonoid glycosides	396442	1.19067e+06	573937	807412	342046	983493	4762.74	1927.52	2325.15	1798.82	3102.37	2608.07	1.24043	0.00026998	0.00074251	283.038	8.14485	up	0
POS_6169	Pelargonidin 3-glucoside	Flavonoids	Flavonoid glycosides	2.02028e+06	747015	1.19904e+06	2.76255e+06	168029	2.45102e+06	1091.6	500.633	456.746	518.541	449.61	479.72	1.01944	0.0096723	0.018474	2514.58	11.2961	up	0
POS_6167	Pelargonidin-3-O-glucoside	Flavonoids	Flavonoid glycosides	1.56226e+06	651482	123332	1.60127e+06	623353	1.49947e+06	186.138	308.509	571.887	206.962	171.337	1033.55	1.05684	0.0064068	0.012814	2178.32	11.089	up	0
NEG_10776	Biorobin	Flavonoids	Flavonoid glycosides	1.26747e+06	6.92495e+06	2.86996e+06	893449	3.82036e+06	4.98593e+06	1204.08	2564.64	685.743	1166.81	1834.31	414.082	1.1532	0.0020756	0.0045398	2972.65	11.5375	up	0
NEG_10772	[6-[2-(3,4-Dihydroxyphenyl)-8-hydroxy-4-oxochromen-7-yl]oxy-3,4,5-trihydroxyoxan-2-yl]methyl (E)-3-(4-hydroxyphenyl)prop-2-enoate	Flavonoids	Flavonoid glycosides	285276	465403	547151	354222	723175	319624	929.571	1436.97	771.304	504.759	537.149	439.287	1.27302	4.3589e-05	0.00015075	625.978	9.28997	up	0
NEG_10780	Cyanidin 3-O-rutinoside	Flavonoids	Flavonoid glycosides	1.49159e+06	1.82912e+06	936856	263145	1.75446e+06	1.07816e+06	925.604	4946.66	638.007	631.72	1623.25	3035.17	1.16157	0.0014914	0.0033539	596.09	9.21939	up	C08620
POS_1912	N-(2-Oxooxolan-3-yl)octanamide	Carboxylic acids and derivatives	Amino acids, peptides, and analogues	631731	567265	542073	645240	533423	646035	45759.6	43004.1	47167.4	42878.7	38902.9	37635.4	1.37308	1.5693e-09	5.1841e-08	13.7883	3.78538	up	0
POS_5327	Syringin	Organooxygen compounds	Carbohydrates and carbohydrate conjugates	98220.1	86754.6	81211.8	100597	82982.6	96319.8	40526.1	27478.4	35761.2	34049	33865.4	35323	1.34869	1.9816e-07	1.6226e-06	2.59626	1.37643	up	0
POS_5412	[1,3-Dihydroxy-1-(7-methoxy-2-oxochromen-6-yl)-3-methylbutan-2-yl] (E)-2-methylbut-2-enoate	Coumarins and derivatives	0	59047.3	46868.3	44563.5	49599.4	39123.8	27350.4	17108.2	18003.4	19695	11738.3	19396.3	21043.9	1.22876	0.00016869	0.0004853	2.32748	1.21877	up	0
POS_6356	Ginkgolide C	Others	0	14759.9	13321.2	14350.9	13866.4	11918.4	14379.7	4547.65	3102.4	4086.1	1288.58	1149.76	1765.15	1.35262	2.0447e-07	1.6589e-06	5.10699	2.35247	up	0
POS_6223	Mundulone	Isoflavonoids	Isoflavans	37964.7	33301.4	30661.4	31365	36180.2	31884.9	16897.8	13463	13785.3	15283.8	11238.1	15458.4	1.35167	1.3931e-07	1.2373e-06	2.27656	1.18685	up	0
POS_2614	2-(6-Aminopurin-9-yl)-5-(hydroxymethyl)oxolane-3,4-diol	Nucleosides, nucleotides, and analogues	0	374405	264906	238122	381297	226748	393788	145126	69931.2	135224	139620	135970	138803	1.18185	0.00076433	0.0018537	2.36155	1.23974	up	0
POS_5250	4-(1,3-Benzodioxol-5-ylmethyl)-3-[(3,4-dimethoxyphenyl)methyl]oxolan-2-one	Lignans, neolignans and related compounds	Tetrahydrofuran lignans	172856	165554	299208	290419	141399	310361	13556.4	9909.18	11311.9	12625.7	9415.87	11645.3	1.27141	6.1166e-05	0.00019863	21.1546	4.4029	up	0
POS_6910	5-[(1R,3S,5R,8S)-3-(beta-D-glucopyranosyloxy)-8-hydroxy-1,5-dimethyl-6-oxabicyclo[3.2.1]oct-8-yl]-3-methyl-, (2Z,4E)-2,4-pentadienoic acid	Prenol lipids	Sesquiterpenoids	221140	190454	187785	194484	181795	233278	55443.9	42356.9	46765.3	51542.3	47619.1	48838.7	1.36637	2.9673e-08	4.2278e-07	4.05154	2.01847	up	0
POS_9002	Arctiin	Lignans, neolignans and related compounds	0	69407.4	71219.9	66409.3	70267.4	65576.7	68881	14869.7	10398.8	10753.3	11727.7	9242.76	11024.9	1.37906	8.5556e-12	1.3661e-09	6.04011	2.59457	up	0
POS_6354	Barbaloin	Benzenoids	0	267580	264683	262547	271160	247209	257925	27294.3	23058.9	25135.1	24394.5	24112.6	26292.9	1.38012	2.7066e-13	1.2965e-10	10.4082	3.37965	up	0
POS_8338	Chaetoglobosin C	Alkaloids and derivatives	Chaetoglobosins	86079.7	77367.6	75340.8	94032.1	77957.5	83436.3	2339.24	7030.02	6379.38	1842.75	1688.61	1057.13	1.37095	1.8544e-09	5.7306e-08	24.0819	4.58988	up	0
POS_5415	S-Adenosylmethionine	Nucleosides, nucleotides, and analogues	5'-deoxy-5'-thionucleosides	451180	378097	289751	444573	335593	482722	107712	106304	85858.2	114536	90219.5	72964.7	1.31707	9.161e-06	3.8157e-05	4.01123	2.00405	up	0
POS_6207	Sayaendoside	Organooxygen compounds	Carbohydrates and carbohydrate conjugates	241993	207625	207514	246156	184156	243734	74084.5	62172.2	62861.3	63366	65149.1	69257.2	1.35153	2.1908e-07	1.7203e-06	3.29316	1.71947	up	0
POS_6700	Vindoline	Others	0	77029	69996.5	66990.9	81821.7	65698.6	83028.4	39062.3	28325.3	31910.1	35419.1	29591.7	31926.5	1.33103	1.9502e-06	1.0496e-05	2.24754	1.16835	up	0
POS_5455	6-formyl-5-hydroxy-10-(hydroxymethyl)-3-methylidene-2-oxo-2H,3H,3aH,4H,5H,8H,9H,11aH-cyclodeca[b]furan-4-yl 2-methylbutanoate	Others	0	53946	48133	46415.2	52822.8	48207.2	52943.9	19947.8	17180.7	16424.9	16958.2	17472.4	17121.7	1.37178	1.6827e-09	5.3735e-08	2.83736	1.50455	up	0
POS_8697	Satratoxin F	Prenol lipids	Sesquiterpenoids	32239.7	29902.7	27057.3	29529.2	28526.9	32421.7	3150.66	2143.04	2708.41	2295.96	3396.47	2568.1	1.37867	1.2581e-10	7.3829e-09	10.8793	3.44351	up	0
POS_894	6-methoxyquinoline	Others	0	269669	230405	227213	266124	217681	275937	14500.7	12472.4	13377.1	7480.99	7401.33	7831.18	1.37142	3.7205e-09	8.9106e-08	23.1642	4.53383	up	0
POS_6510	Luteolin-4'-o-glucoside	Flavonoids	Flavonoid glycosides	51787.7	36880.3	21214.7	53664.9	52625.7	42235.7	4683.81	4063.59	4149.68	3003.39	2491.96	2564.11	1.2672	6.0671e-05	0.00019794	11.8314	3.56455	up	0
POS_3983	(3R,5R)-1,3,5-trihydroxy-4-[(E)-3-(4-hydroxyphenyl)acryloyl]oxy-cyclohexanecarboxylic acid	Organooxygen compounds	Alcohols and polyols	84009.7	70642.4	64199	86424	62929.9	79541.8	7335.42	5329.66	7527.21	7349.44	11807	8796.82	1.35629	8.6973e-08	8.7705e-07	9.06618	3.1805	up	0
POS_8210	Haploperoside C	Coumarins and derivatives	Coumarin glycosides	138960	108104	104108	149400	106486	156792	13998.6	9466.07	11189.3	10341.7	11445.2	12974.3	1.33389	1.8164e-06	9.9435e-06	10.8026	3.43331	up	0
POS_974	1-Deoxynojirimycin	Others	0	109350	108819	186786	202982	198555	261266	106943	60884.1	80712.2	56157.4	95923.1	79201	1.16153	0.0011082	0.002583	2.39693	1.26119	up	0
POS_5732	1-[4-[2-(7-Methoxy-1,3-benzodioxol-5-yl)ethyl]phenoxy]-3-methylbutane-2,3-diol	Stilbenes	0	74113.5	83703.2	56071.1	75714.8	72497.4	84204.4	31160.9	27370.9	27865.6	25910.8	28857.7	23013.9	1.32999	4.0956e-06	1.952e-05	2.72035	1.44379	up	0
POS_4092	2-[(2'R,8R,8aS)-2',4,4,7,8a-Pentamethylspiro[2,3,4a,5-tetrahydro-1H-naphthalene-8,5'-oxolane]-2'-yl]acetic acid	Prenol lipids	Diterpenoids	82392	73663.7	73390.2	85681.1	75212.8	91269.6	43031	38961.6	37171.5	37918.6	39128.6	37588.7	1.34281	8.1542e-07	4.9756e-06	2.04901	1.03493	up	0
POS_6664	5‐(1‐benzofuran‐2‐yl)‐N,N‐dimethyl‐2‐[4‐(piperazin‐1‐yl)phenyl]‐1,3‐thiazole‐4‐carboxamide	Organoheterocyclic compounds	Piperazines	40271.3	41774.1	34707.7	43965	42989.2	46032.6	3837.01	3132.8	3316.07	2951.91	3068.18	3123.59	1.37148	3.6868e-09	8.9106e-08	12.9371	3.69344	up	0
POS_6462	HT-2 Toxin	Prenol lipids	Sesquiterpenoids	83831.1	64706.9	50990.8	73695.8	49920.6	79877.7	4743.45	2847.51	4066.83	3267.99	4493.41	2003.31	1.33973	1.4562e-06	8.3533e-06	17.8798	4.16026	up	0
POS_5109	Methyl 2-hydroxy-6-(4-hydroxy-2-methoxy-6-methoxycarbonylphenoxy)-4-methylbenzoate	Benzenoids	Diphenylethers	71048.5	41120	46382.2	69684	39492.9	64468.1	15289	9364.3	11481.2	13708.3	9836.33	11697	1.26992	5.887e-05	0.0001938	4.39059	2.13441	up	0
POS_10392	(1beta,3beta,9xi,11alpha,14xi)-1,3,11-Trihydroxyfurosta-5,20(22),25-trien-27-yl beta-D-glucopyranoside	Steroids and steroid derivatives	Steroidal glycosides	4051.97	3567	4117.67	3932.12	3770.49	3484.23	18448	15695.9	16795.5	15343.3	15401.5	17202.4	1.37422	3.2166e-09	8.6958e-08	0.229006	-2.12654	down	0
POS_7827	Verrucarin J	Prenol lipids	Sesquiterpenoids	5017.4	4564.03	5117.72	7262.29	5462.82	6082.52	2175.98	2343.74	1976.88	1790.88	1633.5	1444.57	1.30114	1.2794e-05	5.1497e-05	3.00797	1.58879	up	0
POS_12389	(2S,3R,4S,5S,6R)-2-[4-[(3S,3aR,6S,6aR)-6-[3,5-Dimethoxy-4-[(2S,3R,4S,5S,6R)-3,4,5-trihydroxy-6-(hydroxymethyl)oxan-2-yl]oxyphenyl]-1,3,3a,4,6,6a-hexahydrofuro[3,4-c]furan-3-yl]-2,6-dimethoxyphenoxy]-6-(hydroxymethyl)oxane-3,4,5-triol	Lignans, neolignans and related compounds	0	1145.51	1002.72	724.268	1268.95	675.271	1030.52	236.552	175.116	289.786	255.161	531.919	193.362	1.22559	0.0002705	0.00074251	3.35458	1.74613	up	0
POS_5857	(E)-3-(4-Methoxyphenyl)-1-[2,4,6-trimethoxy-3-(3-methylbut-2-enyl)phenyl]prop-2-en-1-one	Linear 1,3-diarylpropanoids	Chalcones and dihydrochalcones	1726.11	1238.97	906.116	1070.65	699.684	715.83	3033.03	3022.7	2966.78	2867.71	2382.31	3058.14	1.34793	3.4802e-07	2.4336e-06	0.320677	-1.64081	down	0
POS_3121	1,2-Didehydrotanshinone IIA	Prenol lipids	Diterpenoids	6939.21	5648.39	6254.56	8046.24	5794.45	7915.28	2591.6	3128.62	1988.6	2459.88	2545.23	3676.91	1.28134	4.0327e-05	0.00013998	2.46421	1.30112	up	0
POS_4396	2-(Hydroxymethyl)-6-(6-hydroxy-6-methyl-3-propan-2-ylcyclohex-3-en-1-yl)oxyoxane-3,4,5-triol	Prenol lipids	Terpene glycosides	30131.6	28608.9	14871.1	31353.4	25518.7	31847.8	9679.54	7506.94	8525.07	7038.23	9102.05	7330.34	1.25711	0.00012302	0.00036486	3.2256	1.68957	up	0
POS_8732	2-(Hydroxymethyl)-6-[5-[3-(hydroxymethyl)-5-(3-hydroxypropyl)-7-methoxy-2,3-dihydro-1-benzofuran-2-yl]-2-methoxyphenoxy]oxane-3,4,5-triol	Flavonoids	0	26435.3	28948.4	17711.6	24111.4	19102.6	21565.4	3669.75	3637.12	4194.98	5313.32	2854.89	4767.47	1.32688	3.9054e-06	1.8896e-05	5.47226	2.45214	up	0
POS_6561	2-Phenylethyl 3-O-(4-carboxy-3-hydroxy-3-methylbutanoyl)-beta-D-glucopyranoside	Saccharolipids	0	19926.1	18474.3	18284.3	23299.6	17047.1	21691.1	2286.71	2493.5	1468.9	1014.43	1276.57	2910.39	1.35839	6.2304e-08	6.8606e-07	10.3538	3.37209	up	0
POS_4310	3-(4-Hydroxyphenyl)propanoic acid 3-(4-hydroxy-3-methoxyphenyl)propyl ester	Phenols	Methoxyphenols	28246.6	28488.5	23793	33751.9	30704	37081.4	2620.68	2602.47	2520.83	2308.12	2690.94	2639.38	1.35349	2.3428e-07	1.7956e-06	11.9996	3.58492	up	0
POS_1194	4-Hydroxy-3-methoxycinnamaldehyde	Phenols	Methoxyphenols	25307.7	21021.7	22452.4	24863.5	20636.6	25398.1	13344.9	11039.2	10505.8	9966.82	10812.4	12131.1	1.33315	1.4545e-06	8.3533e-06	2.02429	1.01742	up	C02666
POS_9695	5-Methoxy-3-methyl-4-[(2S,3R,4S,5S,6R)-3,4,5-trihydroxy-6-[[(2R,3R,4S,5S,6R)-3,4,5-trihydroxy-6-(hydroxymethyl)oxan-2-yl]oxymethyl]oxan-2-yl]oxy-3H-benzo[f][2]benzofuran-1-one	Organooxygen compounds	Carbohydrates and carbohydrate conjugates	9149.67	7450.98	7686.78	9787.02	7474.8	9838.62	30653.4	22097	28447.7	30034.3	27031.2	28401.9	1.35397	3.5869e-07	2.4901e-06	0.304118	-1.7173	down	0
POS_7497	6-[2-Hydroxy-3-methyl-3-[(2S,3R,4S,5S,6R)-3,4,5-trihydroxy-6-(hydroxymethyl)oxan-2-yl]oxybutyl]-5,7-dimethoxychromen-2-one	Fatty Acyls	Fatty acyl glycosides	20192.9	19541.3	19049	20158.9	17752.8	19557.2	10582.6	8437.08	9632.34	8894.11	9461.14	9803.61	1.36364	1.0761e-08	2.0213e-07	2.02901	1.02078	up	0
POS_5416	Ailanthone	Prenol lipids	Terpene lactones	25831.9	19251	24385	23872.9	19800.8	25169.8	4408.25	4148.27	3435.03	3404.32	3578.76	3566.49	1.36039	4.6659e-08	5.798e-07	5.98802	2.58208	up	0
POS_5324	Alantrypinone	Organoheterocyclic compounds	0	19301.5	14909.2	15098.8	18698.3	17520.3	20051.4	4199.46	1923.25	2026.18	3675.99	3896.28	2249.56	1.35094	2.0606e-07	1.6589e-06	5.76136	2.52641	up	0
POS_9730	Alkergot	Alkaloids and derivatives	Lysergic acids and derivatives	1933.69	1491.69	1681.53	2457.55	1791.61	2945.73	13582.6	9202.62	10916.3	15397.3	12486.7	7704.22	1.27776	4.8485e-05	0.0001653	0.179562	-2.47744	down	0
POS_9631	Benzyl 2-O-(D-apio-beta-D-furanosyl)-3-O-(beta-D-glucopyranosyl)-beta-D-glucopyranoside	Organooxygen compounds	Carbohydrates and carbohydrate conjugates	23793.3	21998.8	21192.4	25138.3	16896.8	25172	5196.24	4154.74	5867.58	5541.84	5474.48	5434.25	1.34253	7.8406e-07	4.8255e-06	4.18323	2.06462	up	0
POS_13467	Chlorophyll b from Chlorella	Organoheterocyclic compounds	Chlorins	10698.3	17825.8	16596.5	6116.23	26178	4480.46	37580.4	29646.2	39245.9	22890.3	29477.8	30234.8	1.0972	0.0041024	0.0085438	0.451855	-1.14607	down	0
POS_490	Cinnamaldehyde	Cinnamic acids and derivatives	0	23363.2	22302.8	21211.6	24547.7	21060.4	24068	10854.2	10946.5	9407.7	9428.88	9851.82	10587.4	1.36327	3.333e-08	4.4817e-07	2.2239	1.15309	up	C00903
POS_9764	Ergocristam	Alkaloids and derivatives	Lysergic acids and derivatives	3771.61	2594.77	2674.05	3808.78	2482.51	3959.3	20509.4	20421	15938.6	12217.8	19765.5	20019	1.32056	4.5912e-06	2.1351e-05	0.171057	-2.54745	down	0
POS_4705	Jacobine N-oxide	Others	0	2701.99	2576.67	2208.49	2628.09	2577.35	2965.11	7281.97	7775.26	6048.42	7743.21	8089.55	8408.07	1.34356	4.6145e-07	3.1352e-06	0.342841	-1.54439	down	0
POS_5079	Loratadine	Organoheterocyclic compounds	0	24915.3	21502.8	20539.7	25337.2	24955.5	26729.9	5708.63	4669.35	4769.7	4797.25	4627.17	6826.79	1.35844	5.5849e-08	6.6054e-07	4.55042	2.186	up	C06818
POS_7640	Mundulone acetate	Isoflavonoids	Isoflavans	9037	6074.56	5664.37	6098.31	5508.39	7802.11	1923.58	1016.59	994.109	1330.54	1232.23	1257.75	1.34859	6.0303e-07	3.9299e-06	4.81997	2.26903	up	0
POS_1361	Myristicin	Organoheterocyclic compounds	0	10746.5	7623.72	8367.95	10063.8	8456.82	12456.2	4089.09	3074.73	3814.97	3489.42	4141.14	3673.52	1.2769	5.6337e-05	0.00018611	2.5294	1.3388	up	C10480
POS_6121	Nodakenin	Coumarins and derivatives	Furanocoumarins	1645.55	2134.39	1185.38	1180.92	2441.22	1376.65	21486.1	18503.2	19337.8	18248.8	20010.2	18432.7	1.37625	3.3991e-10	1.6282e-08	0.0860437	-3.53879	down	0
POS_7249	Paeonolide	Others	0	18628.6	17808.1	17422	20190.9	19594.7	21911.1	2170.55	530.06	953.498	854.369	803.881	1389.36	1.371	2.3853e-09	6.9247e-08	17.3557	4.11734	up	0
POS_7158	Petunidin 3-galactoside	Flavonoids	Flavonoid glycosides	1612.14	906.99	1039.16	870.824	746.753	1155.49	347.742	121.886	51.3039	152.968	305.192	112.978	1.31855	7.1393e-06	3.0948e-05	5.18565	2.37452	up	0
POS_8895	Satratoxin H	Prenol lipids	Sesquiterpenoids	5081.89	5062.16	3522.65	6113.76	3097.41	8515.62	1115.73	1986.77	1050.86	492.855	1113.16	579.033	1.17617	0.0012823	0.002953	4.98132	2.31653	up	0
POS_1181	Serotonin	Organoheterocyclic compounds	Tryptamines and derivatives	44163.8	30061.6	29399.4	44906.7	26350.2	46061.2	1148.72	1937.48	1257.42	827.659	975.214	1964.94	1.31383	8.6618e-06	3.6555e-05	26.1527	4.70889	up	C00780
POS_4389	Staphylin	Organooxygen compounds	Carbohydrates and carbohydrate conjugates	8783.21	7310.8	7115.99	8814.88	7169.7	8930.6	2171.85	732.832	2170.87	1757.99	1792.41	1856.3	1.34823	2.2455e-07	1.7348e-06	4.5039	2.17117	up	0
POS_4931	Xanthohumol	Linear 1,3-diarylpropanoids	Chalcones and dihydrochalcones	5472.8	5445.09	5281.94	5945.83	5309.59	7270.97	2839.01	1825.32	2110.34	2359.51	1738	2380.64	1.32116	5.6496e-06	2.5291e-05	2.6488	1.40534	up	C16417
NEG_4515	Lactulose	Organooxygen compounds	Carbohydrates and carbohydrate conjugates	14870.3	24657	28150.4	13015.9	29272.5	24868.9	199037	229988	232915	179725	201434	223833	1.36341	1.4351e-08	2.4998e-07	0.113627	-3.13762	down	C07064
NEG_8385	(6,6-Dimethylbicyclo[3.1.1]hept-2-yl)methyl 6-O-[(2R,3R,4R)-3,4-dihydroxy-4-(hydroxymethyl)tetrahydro-2-furanyl]-beta-D-glucopyranoside	Prenol lipids	Terpene glycosides	5779.7	4107.39	4140.42	5208.44	4164.14	4264.65	519.279	133.943	136.522	436.795	288.752	239.191	1.36282	8.2744e-09	1.7615e-07	14.9685	3.90386	up	0
NEG_7090	Pentose-Hexose + C10H17	Prenol lipids	Terpene glycosides	2396.98	3334.14	2836.69	3278.18	2662.53	3556.69	121.284	307.878	455.174	123.795	379.914	761.231	1.3588	1.1036e-07	1.0468e-06	8.74814	3.12898	up	0
NEG_11723	Rhamnetin 3-sophoroside	Flavonoids	Flavonoid glycosides	185166	131523	61640.6	122369	113852	46970.6	1641.64	1304.4	1574.75	1225.02	1591.73	1728.92	1.23132	0.00018608	0.00052898	63.0477	5.97837	up	0
NEG_6381	3-[(7S,8S)-5-Hydroxy-2,2,7,8-tetramethyl-6-oxo-7,8-dihydropyrano[3,2-g]chromen-10-yl]-3-phenylpropanoic acid	Organoheterocyclic compounds	1-benzopyrans	14778.4	13407.9	11228.6	19586.8	10494.7	20749.7	101224	68284.7	92291.6	96733.9	87918.4	87899.2	1.3544	2.9042e-07	2.1077e-06	0.16948	-2.56081	down	0
NEG_9789	4-[(E)-3-[(2R,3R,4S,5S,6R)-3-[(2S,3R,4R)-3,4-Dihydroxy-4-(hydroxymethyl)oxolan-2-yl]oxy-4,5-dihydroxy-6-(hydroxymethyl)oxan-2-yl]oxybut-1-enyl]-3,5,5-trimethylcyclohex-2-en-1-one	Fatty Acyls	Fatty acyl glycosides	120583	103913	98062	133996	95263.2	137582	45134.8	36471.8	37434.4	27572.6	42072.2	43352.3	1.30619	1.2258e-05	4.9551e-05	2.9417	1.55665	up	0
NEG_566	Methionine	Carboxylic acids and derivatives	Amino acids, peptides, and analogues	66795.1	64426.9	61468.2	58433.3	53911.1	44397.7	204815	251770	239527	228398	279132	280923	1.35168	2.1841e-07	1.7203e-06	0.228462	-2.12998	down	C00073
NEG_9835	3,5,5-Trimethyl-4-[3-[(6-O-beta-D-xylopyranosyl-beta-D-glucopyranosyl)oxy]butyl]-2-cyclohexen-1-one	Fatty Acyls	Fatty acyl glycosides	45902.3	40496.3	37952.7	51000.5	38871.2	55074.3	3834.27	2968.49	2945.11	2069.59	2637.73	3234.57	1.35045	3.4601e-07	2.4336e-06	15.1543	3.92165	up	0
NEG_2394	Pinocembrin	Flavonoids	Flavans	271166	84404.6	80470.1	102500	77560.6	81940.6	28019.4	25386.5	25538.8	25668.3	27067.1	26938.5	1.34951	1.377e-07	1.2373e-06	3.22945	1.69129	up	C09827
NEG_8700	3,4,5-Trihydroxy-6-[5-hydroxy-2-(4-hydroxy-3-methoxyphenyl)-3-methoxy-4-oxochromen-7-yl]oxyoxane-2-carboxylic acid	Flavonoids	Flavonoid glycosides	39654.5	44798.8	46211.7	46211.6	49080.8	56622.4	1197.23	487.676	894.605	326.279	1036.15	1213.31	1.37493	1.3679e-09	4.9054e-08	56.5451	5.82133	up	0
NEG_2388	Purpurin	Benzenoids	Anthraquinones	54237.7	65081.5	77299.2	73340.6	51561.6	62187.9	424.982	334.081	183.604	219.427	107.113	144.585	1.35683	5.9114e-08	6.7418e-07	279.65	8.12748	up	0
NEG_3192	Eriodictyol	Flavonoids	Flavans	101383	64346.2	53400.7	81344.1	52919.2	81717.2	26402.8	19048.9	21843.6	23337.9	23210.4	24453	1.28423	3.8681e-05	0.00013475	2.89578	1.53395	up	C05631
NEG_4146	1-(4-Hydroxyphenyl)-3-[(2R,3R,4S,5S,6R)-3,4,5-trihydroxy-6-(hydroxymethyl)oxan-2-yl]oxypropan-1-one	Fatty Acyls	Fatty acyl glycosides	120031	78620	79692.5	93812.3	72862.2	98791.3	43694	31929	37893	39108.2	36542.9	39365	1.32137	4.2838e-06	2.0216e-05	2.22524	1.15396	up	0
NEG_3494	Fenhexamid	Benzenoids	Anilides	73574.5	53796.3	48277.4	53684	50357.5	54238.3	10344.1	10657.5	9163.4	9646.75	9269.39	9503.65	1.38009	2.5874e-11	3.0985e-09	5.33276	2.41488	up	0
NEG_7493	Hydrangeifolin I	Organooxygen compounds	Carbohydrates and carbohydrate conjugates	73435.6	71936.4	68715.8	77854.5	65549.3	81148.9	18568	15853.8	16628.2	17648	16692.9	16795.8	1.37072	5.1656e-09	1.1704e-07	4.28872	2.10055	up	0
NEG_3234	(-)-Epicatechin	Flavonoids	Flavans	104575	96681.4	93988.7	104250	81198.5	116210	318903	248829	284530	293639	290949	295006	1.36355	4.9007e-08	5.9429e-07	0.341134	-1.55159	down	C09727
NEG_13716	3-[6-[[(2R,3R,4R,5S,6S)-3,5-Dihydroxy-6-methyl-4-[(2S,3R,4R,5R,6S)-3,4,5-trihydroxy-6-methyloxan-2-yl]oxyoxan-2-yl]oxymethyl]-3,4,5-trihydroxyoxan-2-yl]oxy-2-(3,4-dihydroxyphenyl)-5,7-dihydroxychromen-4-one	Flavonoids	Flavonoid glycosides	46541.4	59931.6	55710.5	61805.7	52156.1	78363	17991.1	16117.1	16999.9	10982	16231.4	16699.5	1.3394	1.8373e-06	1.0001e-05	3.88923	1.95949	up	0
NEG_621	3,4-Dihydroxybenzoic acid	Benzenoids	Benzoic acids and derivatives	64416.5	46645.8	46110.7	54812.8	44444.9	58755.2	2860.11	3028.64	2508.05	3022.62	3989.93	2720.75	1.36695	1.7515e-08	2.9052e-07	16.5981	4.05294	up	C00230
NEG_6370	Mangiferin	Organoheterocyclic compounds	1-benzopyrans	42104.2	50579	42989.1	42968.3	41421.8	59444.7	4117.2	6046.68	5290.6	3885.52	6255.1	6202.3	1.3591	2.6121e-07	1.9704e-06	8.95897	3.16333	up	0
NEG_1184	Methyl gallate	Benzenoids	Benzoic acids and derivatives	64360.7	40489.6	34975.1	50442.8	33727.8	50952.4	1662.38	1410.51	2333.86	1968.83	1256.08	1769.38	1.34455	7.0364e-07	4.4641e-06	24.296	4.60265	up	0
NEG_6228	2-Phenylethyl 6-O-[(2S,3R,4R)-3,4-dihydroxy-4-(hydroxymethyl)tetrahydro-2-furanyl]-beta-D-glucopyranoside	Organooxygen compounds	Carbohydrates and carbohydrate conjugates	464465	374997	337403	490676	325823	554453	170932	127588	151387	113771	144548	152815	1.2609	0.00010595	0.0003212	2.90352	1.5378	up	0
NEG_7497	Bioside	Organooxygen compounds	Carbohydrates and carbohydrate conjugates	425744	370261	342183	442131	334531	484893	181412	152993	172118	172461	165617	170636	1.30534	1.531e-05	5.9141e-05	2.33323	1.22233	up	0
NEG_7185	Methyl (1R,4aS,9S,10S)-10-acetyloxy-5,9-dihydroxy-1,4a-dimethyl-2-oxo-7-propan-2-yl-10,10a-dihydro-9H-phenanthrene-1-carboxylate	Steroids and steroid derivatives	Hydroxysteroids	128194	105759	89403.2	137071	82813.4	157698	53865	41534.8	49157.1	48752.1	47416.3	48916.4	1.19774	0.00065568	0.0016135	2.37293	1.24667	up	0
NEG_4498	Boscalid	Benzenoids	Diphenylmethanes	4525.32	3950.63	3304.82	1582.8	2758.11	4244.2	360.642	363.052	256.358	315.229	195.353	198.772	1.28058	8.4404e-05	0.0002645	11.2516	3.49206	up	0
NEG_7486	Hispidulin 4'-glucoside	Flavonoids	Flavonoid glycosides	9686.06	8759.2	8042.71	9920.27	8130.83	10023.8	2297.72	1915.2	1839.27	1388.98	2026.41	1836.01	1.36363	3.0451e-08	4.2278e-07	4.76417	2.25223	up	0
NEG_3461	Hydroxygenkwanin	Others	0	56964.5	32812.5	29243.1	37216.5	21575.9	36805.9	16572.7	15308.2	16047.5	16061.3	13738.8	16632.9	1.24023	0.0002101	0.00059199	2.00489	1.00352	up	0
NEG_11397	Isorhamnetin-3-O-galactoside-6''-rhamnoside	Others	0	16906.2	16286.8	19808.8	23440.5	19042.2	25264.9	3342.37	2457.27	1075.4	582.535	3057.57	899.18	1.3431	6.5888e-07	4.2363e-06	10.9171	3.44852	up	0
NEG_4445	Licocoumarone	Flavonoids	0	284912	19342.9	22059.2	44403.5	23077.6	11298.4	49579	60028.7	54985.4	53033.9	55810.1	53946	1.24315	0.00023677	0.00065746	0.440509	-1.18276	down	0
NEG_2991	Guanosine	Nucleosides, nucleotides, and analogues	0	56324.3	58008.6	55903.6	66342.7	55302.2	73023.9	33297.3	27430.5	28297.1	30846.2	28515.5	28152.3	1.32613	3.983e-06	1.9174e-05	2.09754	1.0687	up	0
NEG_14254	[4-[4,5-Dihydroxy-6-methyl-3-[3,4,5-trihydroxy-6-(hydroxymethyl)oxan-2-yl]oxyoxan-2-yl]oxy-6-[2-(3,4-dihydroxyphenyl)ethoxy]-3,5-dihydroxyoxan-2-yl]methyl (E)-3-(3,4-dihydroxyphenyl)prop-2-enoate	Organooxygen compounds	Carbohydrates and carbohydrate conjugates	9804.07	7079.38	7996.43	6239.89	8541.54	5607.05	2380.67	2274.24	2057.86	1408.08	2314.43	1976.93	1.31556	4.3538e-06	2.0446e-05	3.42865	1.77764	up	0
NEG_5885	2-O-Glucosyloxy-4-methoxycinnamic acid	Organooxygen compounds	Carbohydrates and carbohydrate conjugates	19836.3	18634.1	17660.7	18874.3	17185.8	22967.4	5000.92	4561.01	4579.3	4942.19	4659.67	5115.98	1.36212	9.3703e-08	9.2544e-07	3.96369	1.98685	up	0
NEG_1314	3-(4-Hydroxy-3-methoxyphenyl)-2-propenoic acid	Cinnamic acids and derivatives	Hydroxycinnamic acids and derivatives	17392	17726.1	16698.8	21088.5	14901.3	19718.7	4736.96	3848.56	4653.13	5310.02	4343.74	4870.92	1.34786	3.2863e-07	2.3321e-06	3.89575	1.9619	up	0
NEG_3402	3-Hydroxy-7-methoxy-2-(4-methoxyphenyl)-4H-chromen-4-one	Flavonoids	Flavones	17142.3	13614.3	13539.7	16800	12116.2	18353.6	4612.76	3347.38	4142.83	3860.75	3785.01	4427.05	1.32824	3.0578e-06	1.5337e-05	3.69413	1.88523	up	0
NEG_556	3,4-Dihydrocoumarin	Coumarins and derivatives	0	44663.4	40725.8	38555.1	45089.9	36936.3	46056.2	8715.76	7936.45	9118.05	9313.36	8279.66	8653.07	1.3689	8.4996e-09	1.7701e-07	4.78377	2.25815	up	C02274
NEG_327	4-Vinylphenol	Benzenoids	Styrenes	9374.6	9832.1	8884.15	10585.7	9342	11790.7	3961.53	3829.87	3670.44	3718.42	3898.41	3236.95	1.35452	3.0234e-07	2.1615e-06	2.71209	1.4394	up	C05627
NEG_4354	Altertoxin I	Benzenoids	0	8449.19	2694.95	2521.09	4122.18	2610.06	2874.85	5795.21	4559.87	6633.55	7572.31	6282.65	6683.4	1.25745	0.00015715	0.00045621	0.474001	-1.07704	down	0
NEG_1059	Coniferyl aldehyde	Phenols	Methoxyphenols	18429.7	16843.3	18409.8	19785.4	15699.6	20532.3	10824.7	8703.61	9095.48	9013.6	8190.48	8842.55	1.32518	3.2905e-06	1.6333e-05	2.00337	1.00243	up	0
NEG_5746	gamma-Mangostin	Organoheterocyclic compounds	1-benzopyrans	23139.2	20025.6	16635.5	20478.4	16274.9	20115.4	2185.55	1348.1	1899.19	1586.22	1476.19	1999.29	1.36871	8.9879e-09	1.7938e-07	10.6946	3.41881	up	0
NEG_8963	Isochlorogenic acid A	Organooxygen compounds	Alcohols and polyols	13133.9	11320	13772.9	9889.96	7237.04	14208.5	2748.57	4031.39	2408.35	974.452	2720.49	4073.76	1.27055	9.3547e-05	0.00028552	3.99329	1.99758	up	0
NEG_4880	Matairesinol	Others	0	2962.46	319.502	874.558	1967.32	804.075	1201.34	18886	11895.7	16298.3	17917.4	16205.6	17024	1.35833	2.4471e-07	1.8606e-06	0.0631194	-3.98577	down	0
NEG_559	p-Coumaraldehyde	Cinnamic acids and derivatives	0	45806.4	28547.7	29784.1	36601.3	28031	41466	16550.2	10920.9	13337.8	13652.8	12935.9	13231.4	1.28992	2.9417e-05	0.00010555	2.4472	1.29113	up	0
NEG_6485	Pentose-Hexose + C5H9	Fatty Acyls	Fatty acyl glycosides	13103.7	11302.6	11654.6	12953.4	10742.7	13788.2	5085.15	2110.46	4756.65	1832.84	3609.51	4553.72	1.32429	2.5132e-06	1.3302e-05	3.30458	1.72447	up	0
NEG_10464	Procyanidin B1	Flavonoids	Biflavonoids and polyflavonoids	40062.2	35273.8	37539.9	40016.8	38783.7	37663.3	4498.99	4639.31	4238.89	3247.2	4816.1	4766.67	1.37688	7.6824e-12	1.3661e-09	8.66701	3.11553	up	C10221
NEG_907	Vanillic acid	Benzenoids	Benzoic acids and derivatives	11229.7	13897.6	12251.2	14911.8	13759.7	10050.6	4037.62	7038.28	6175.21	7722.64	7140.42	6428.92	1.26002	7.7101e-05	0.00024377	2.01967	1.01412	up	C06672
POS_2462	2-(((R)-2,3-Dihydroxypropyl)phosphoryloxy)-N,N,N-trimethylethanaminium	Glycerophospholipids	Glycerophosphocholines	67733.2	71312.4	52815.6	56820.9	53637.9	64988.8	11212.9	25655.7	10621.7	27855.8	67538.1	7355.1	1.03308	0.0095859	0.018367	2.3928	1.2587	up	0
POS_7044	6-[(4E,6E)-2,3-Dihydroxy-4,6-dimethyl-7-(2,4,5-trimethyl-3,6-dioxabicyclo[3.1.0]hexan-2-yl)hepta-4,6-dien-2-yl]-4-methoxy-3,5-dimethylpyran-2-one	Fatty Acyls	Fatty alcohols	97830	66680.3	59789.9	98837.9	54040.4	119026	19843.6	17685.2	19132.9	19313.9	18865.4	19052.7	1.21444	0.00045253	0.0011749	4.19727	2.06945	up	0
POS_4210	Camptothecin	Alkaloids and derivatives	0	337055	331159	337999	337684	346219	359373	7963.57	6331.24	6949.1	6726.77	7032.36	8181.77	1.38178	5.7304e-14	5.4897e-11	47.5851	5.57244	up	0
POS_7767	Catalposide	Organooxygen compounds	Carbohydrates and carbohydrate conjugates	70020.8	61054.8	57720.5	63690.4	53592.4	71791	27564.8	24491.2	25086.8	23708.6	25032.7	24639.6	1.35157	4.1464e-07	2.8577e-06	2.45423	1.29527	up	0
POS_6079	Isolupalbigenin	Isoflavonoids	Isoflav-2-enes	137387	101610	97503.8	141915	101831	153047	19993.6	14358.3	16449.5	18048.4	18249.5	17592.9	1.32153	5.0586e-06	2.2752e-05	6.8306	2.77201	up	0
POS_10217	Jaslanceoside A	Prenol lipids	Terpene glycosides	63840.8	57238.7	55106.3	60500.5	53710.6	62854.4	543.773	116.278	460.037	484.812	444.857	615.677	1.37926	3.2953e-11	3.5076e-09	130.295	7.02564	up	0
POS_7890	Scutellarioside II	Cinnamic acids and derivatives	Hydroxycinnamic acids and derivatives	217464	174082	152702	214047	159583	223958	33662.6	24349	27759.9	27842.5	24789.1	28414	1.34327	7.8579e-07	4.8255e-06	6.64938	2.73322	up	0
POS_12759	Ginsenoside Rk1	Others	0	111337	148188	134179	97161.6	140932	73782.5	54280.6	44386	43675.1	41653.9	43829.5	44626.8	1.21353	0.00032397	0.0008718	2.61732	1.38809	up	0
POS_6847	Delphinidin 3-glucoside	Flavonoids	Flavonoid glycosides	43961.8	60765.3	52091	40094.2	55668	44213.9	4437.08	6114.36	2301.26	3399.53	2276.66	4132.27	1.35262	2.7311e-07	2.0126e-06	13.3885	3.74292	up	0
POS_3265	(-)-Epitaxifolin	Flavonoids	Flavans	33916	28759.4	26970.5	34321.3	25915.9	36909.9	5203.92	3420.75	4027.01	3599.64	3916.32	3794.91	1.35234	2.6811e-07	2.0066e-06	7.6558	2.93655	up	0
POS_7252	(2R,3S,4S,5R,6R)-2-[[(2S,3R,4R)-3,4-dihydroxy-4-(hydroxymethyl)oxolan-2-yl]oxymethyl]-6-[4-(4-hydroxyphenyl)butan-2-yloxy]oxane-3,4,5-triol	Fatty Acyls	Fatty acyl glycosides	13220.5	14424.5	12047.6	15521.8	12630.7	13523.9	2166.33	1875.56	2733.02	2486.03	2044.85	2602.44	1.36481	1.159e-08	2.1352e-07	5.87993	2.5558	up	0
POS_3331	(3S,6R,6As,7S)-6,6a,7,8-tetrahydroxy-3-methyl-3,4,5,6,7,12a-hexahydro-2H-benzo[a]anthracene-1,12-dione	Benzenoids	0	9533.77	9157.99	10074.6	9159.94	9814.93	9616.54	672.635	5203.91	6566.45	4951.84	4744.46	5513.65	1.20939	0.00048003	0.0012329	2.07533	1.05334	up	0
POS_5686	2-[(2Z)-5-(Hexopyranosyloxy)-2-penten-1-yl]-3-oxo-, (1R,2R)-cyclopentaneacetic acid	Fatty Acyls	Fatty acyl glycosides	39222.8	31654.9	29000.1	42203	27886.8	42264.3	10793.7	7863.04	10501.6	8833.58	9382.37	9624.64	1.30668	1.1976e-05	4.8615e-05	3.64232	1.86486	up	0
POS_9360	2-Methoxy-4-[tetrahydro-3a,6a-dihydroxy-4-(4-hydroxy-3-methoxyphenyl)-1H,3H-furo[3,4-c]furan-1-yl]phenyl-beta-D-glucopyranoside	Lignans, neolignans and related compounds	0	5809.34	5919.11	5933.11	6960.78	5270.43	7224.38	40597.1	30548.8	34983.1	34763.6	33972.5	32920.9	1.36767	1.8965e-08	3.0794e-07	0.180809	-2.46746	down	0
POS_7253	4-(4-Hydroxyphenyl)-2-butanyl 6-O-[(4xi)-alpha-L-threo-pentofuranosyl]-beta-D-glucopyranoside	Fatty Acyls	Fatty acyl glycosides	16814.6	15022.6	14003.7	15417.3	13204.8	14371.8	6710.42	5909.28	3685.34	2498.31	4616.72	3392.71	1.3452	5.8649e-07	3.8749e-06	3.22321	1.6885	up	0
POS_5851	Cyanidin 3-arabinoside cation	Flavonoids	Flavonoid glycosides	20320	15685.3	18191	23442.3	20671.5	22279.4	614.446	431.442	254.041	399.601	538.724	341.441	1.35425	8.5879e-08	8.7705e-07	46.6418	5.54355	up	0
POS_9957	Diadinoxanthin A	Prenol lipids	Triterpenoids	21203.7	14597.2	16659.6	19238.5	18376.4	17799.7	3871.66	4352.96	4145.41	3726.85	3432.96	4300.49	1.35971	2.2888e-08	3.4804e-07	4.36433	2.12576	up	0
POS_3412	Dihydroxyoctadecadienoic acid	Fatty Acyls	Lineolic acids and derivatives	8703.74	7608.92	2711.15	7997.82	8379.04	12425.2	15838.9	14850.8	17062.5	17503	17250	16201.4	1.22294	0.00023451	0.00065307	0.475624	-1.07211	down	0
POS_5734	Erysubin F	Isoflavonoids	Isoflav-2-enes	3088.54	2985.48	4525.68	3037.4	3037.19	3933.89	8215.14	4381.08	6328.53	10260.1	5590.29	7468.77	1.07365	0.0056494	0.011442	0.497661	-1.00676	down	0
POS_895	Indole-3-acetaldehyde	Organoheterocyclic compounds	Indoles	3830.25	4458.75	4800.87	5605.63	4809.18	6551.45	16379.2	13298.1	12028.1	12955.4	11897.7	12657.2	1.32116	4.4527e-06	2.0808e-05	0.397283	-1.33176	down	C00637
POS_1357	Isoscopoletin	Others	0	42781.8	36348.6	31503.8	41146	36764.6	44804.1	18741	15924.5	15926.3	16070.2	15619.7	16334.5	1.33022	2.8514e-06	1.4681e-05	2.31889	1.21344	up	0
POS_2950	Kaempferol	Flavonoids	Flavones	50413.4	42214.5	46208.2	52789.5	45979.1	60430.8	25596	19131.5	24308.2	18430.8	22237.5	24781.1	1.30202	1.4246e-05	5.6058e-05	2.20951	1.14372	up	C05903
POS_4926	Marticin	Others	0	16484.6	13888.5	11885.2	17905.2	11852.6	17457.7	7408.59	5887.93	6135.83	6225.92	5843.39	6136.1	1.26805	7.4134e-05	0.00023595	2.3271	1.21853	up	0
POS_7271	Thalictricoside	Organooxygen compounds	Carbohydrates and carbohydrate conjugates	10619.7	9372.17	8116.16	10466.2	8322.22	9292.77	2622.07	2285.25	2576.04	2675.57	2717.53	2575.93	1.35977	3.9502e-08	4.9793e-07	3.53882	1.82327	up	0
POS_3685	Tiapride	Benzenoids	Benzenesulfonyl compounds	18194.7	17329	16368.1	21884.6	16779.2	19980.1	6772.56	5432.4	5304.71	5421.67	5481.44	4115.29	1.34423	4.873e-07	3.2876e-06	3.40657	1.76832	up	0
NEG_620	2,3-Dihydroxybenzoic acid	Benzenoids	Benzoic acids and derivatives	189360	218960	181144	238228	183449	267109	4077	5792.18	4432.68	3968.55	5148.58	5747.42	1.35809	1.6214e-07	1.3869e-06	44.8009	5.48545	up	C00196
NEG_475	Salicylic acid	Benzenoids	Benzoic acids and derivatives	27961.9	23103.6	18609.9	22264.1	21634.8	21759	10098.7	9562.97	11803.1	10671.1	10410.5	10316	1.35411	1.6462e-07	1.3957e-06	2.04964	1.03537	up	C00805
NEG_5518	1-O-Sinapoyl-beta-D-glucose	Cinnamic acids and derivatives	Hydroxycinnamic acids and derivatives	252044	175008	162158	209866	189817	163743	21105.7	19407.8	21210.1	19598	19576.8	21561.8	1.36161	1.0022e-08	1.9377e-07	8.82535	3.14165	up	0
NEG_1229	3-Hydroxysuberic acid	Hydroxy acids and derivatives	Medium-chain hydroxy acids and derivatives	77780.9	139710	94568	120256	93184	137866	7290.2	5503.52	6769.53	7011.74	6185.88	6655.49	1.3495	6.9577e-07	4.4436e-06	17.8275	4.15604	up	0
NEG_10900	3'-Galloylquercitrin	Flavonoids	Flavonoid glycosides	88881.8	102870	76799	87543.5	73254.7	136090	1611.84	1797.49	1394.43	707.52	1494.24	1864.17	1.32494	7.8077e-06	3.357e-05	64.4745	6.01066	up	0
NEG_195	Catechol	Phenols	Benzenediols	125393	142579	115650	153591	121570	169043	2276.71	2327.02	1754.77	1987.32	1522.93	2346.78	1.3614	8.6435e-08	8.7705e-07	69.0036	6.1086	up	C15571
NEG_3935	Dihydromyricetin	Flavonoids	Flavans	92709.6	77650	77881.7	96481.6	78768.2	86345.5	1449.55	213.77	319.048	825.99	1592.76	1210.32	1.37047	1.2427e-09	4.9054e-08	89.2061	6.47907	up	0
NEG_7127	Flavanomarein	Flavonoids	Flavonoid glycosides	232404	182264	169631	238901	157316	260597	20401.2	20764.6	18581.5	34623.7	26385.5	22777.7	1.32385	4.9723e-06	2.2469e-05	8.43313	3.07607	up	0
NEG_6686	Flavanone base + 3O, O-Hex	Flavonoids	Flavonoid glycosides	139023	132594	110190	162886	98447.1	181011	24221.2	22133.9	22200.1	12230.9	23892.9	25961.3	1.30234	1.9744e-05	7.3886e-05	6.29327	2.65381	up	0
NEG_2313	N-Phenylacetylaspartic acid	Carboxylic acids and derivatives	Amino acids, peptides, and analogues	47554.2	71956.1	53181.7	88082.9	54401.6	146156	8586.22	7722.57	7403.28	7577.25	7471.12	6495.66	1.19217	0.00087883	0.0020943	10.9716	3.45571	up	0
NEG_2714	Phloretin	Linear 1,3-diarylpropanoids	Chalcones and dihydrochalcones	302685	161240	145821	198808	143368	186163	14813	11929	13137.8	12990.6	12673.3	13817.5	1.35738	8.5701e-08	8.7705e-07	12.6318	3.65899	up	C00774
NEG_270	Pyrrolidine-2-carboxamide	Carboxylic acids and derivatives	Amino acids, peptides, and analogues	59604.5	73094.9	68717	90321.9	64942.7	115338	15120.9	8108.37	12290.1	10930.1	10829.5	11070.8	1.30838	1.4761e-05	5.7483e-05	7.24061	2.85611	up	0
NEG_11429	Quercetin-3,4'-O-di-beta-glucoside	Others	0	104143	113632	111011	102342	106814	120730	9816.91	9597.03	11182.4	6320.74	10031.3	8617.23	1.38069	6.3788e-11	5.5553e-09	11.9756	3.58203	up	0
NEG_1887	Resveratrol	Stilbenes	0	99051.7	91839.3	82969.9	94200.1	86951.8	89768.8	36879.3	27383.5	29680.2	32636.6	29770.2	32550.6	1.3705	1.2651e-09	4.9054e-08	2.8315	1.50157	up	C03582
NEG_10467	Rhoifolin	Flavonoids	Flavonoid glycosides	127673	131281	134590	131718	121117	136416	601.944	559.898	483.543	776.763	366.377	616.192	1.38123	1.1832e-12	2.8337e-10	230.899	7.85112	up	0
NEG_10773	Tiliroside	Flavonoids	Flavonoid glycosides	45699.7	97633	101661	97011.6	45477.9	115115	18463.9	30520.1	10994.1	7900.95	14452.7	32484.5	1.25273	0.00016551	0.00047758	4.77532	2.2556	up	0
NEG_6749	trans-piceid	Others	0	96954.8	85250.6	78231.4	90891.6	79628.9	91012.3	30721	27280.7	28921	30184.5	28916	29354.5	1.37092	3.3892e-09	8.6958e-08	2.90808	1.54006	up	0
NEG_6751	Trilobatin	Others	0	248574	177786	157071	224407	144819	259729	4722.05	3929.49	3703.16	4360.65	4190.81	4547.85	1.32612	4.633e-06	2.1441e-05	45.438	5.50583	up	0
NEG_7124	Eriodictyol-7-O-glucoside	Flavonoids	Flavonoid glycosides	65032.2	53190.4	48166.6	64553	51662.8	75381.6	5855.09	5245.49	4342	2874.8	5410.73	5115.43	1.34431	8.8158e-07	5.3117e-06	12.188	3.60739	up	0
NEG_3467	Salicylic acid glucoside	Organooxygen compounds	Carbohydrates and carbohydrate conjugates	83382.2	103035	97310.8	89940.1	102781	92580.2	29965.5	33133	31769.8	29184.6	30363.4	29414.7	1.37527	6.7425e-10	2.9361e-08	3.17017	1.66456	up	0
NEG_13715	Cyanidin 3-(2G-glucosylrutinoside)	Others	0	73252.8	70977.1	69958.3	75125.6	69465.9	75681.2	33346.1	31671.5	30808.4	31791.5	31729.8	32121.2	1.37687	1.2581e-10	7.3829e-09	2.26383	1.17876	up	0
NEG_1532	N-Acetyl-L-phenylalanine	Carboxylic acids and derivatives	Amino acids, peptides, and analogues	58237.8	75835.6	74884.9	99982.4	66356.8	140330	26380.4	23533.1	23091.7	25283.2	24216.8	22782.1	1.2265	0.00036147	0.00095925	3.77786	1.91757	up	C03519
NEG_11430	Quercetin 3-O-sophoroside	Flavonoids	Flavonoid glycosides	102195	145601	132782	170843	123886	189568	58607.8	48428.3	49954.1	53790.9	50824.9	51133.1	1.3169	8.2685e-06	3.5205e-05	2.92646	1.54916	up	0
NEG_7482	Kaempferol 3-glucuronide	Flavonoids	Flavonoid glycosides	43410	53530.8	51768.5	61010.4	46332.3	63276.9	4870.04	4320.68	4504.67	3516.06	3468.34	4571.9	1.36598	2.1468e-08	3.3172e-07	13.1122	3.71284	up	0
NEG_6753	Phlorizin	Flavonoids	Flavonoid glycosides	64741.6	47957.4	43172.7	61131.3	40493	30890.8	7803.92	6429.08	6195.13	7218.94	7361.56	5941.28	1.29207	1.4278e-05	5.6058e-05	6.55351	2.71227	up	C01604
NEG_4161	9,10-Dihydroxy-8-oxooctadec-12-enoic acid	Fatty Acyls	Lineolic acids and derivatives	75122.7	65680.8	60878.4	82608.7	57505.9	82484.4	167086	126494	150619	143913	153182	156377	1.3325	3.0577e-06	1.5337e-05	0.466744	-1.0993	down	0
NEG_5603	cis-Piceid	Stilbenes	Stilbene glycosides	48401.4	39640.6	36528.3	44673	37601.5	43028.1	16805.1	14462.2	15215.3	15509.4	14735.3	16342.6	1.36023	3.9488e-08	4.9793e-07	2.59767	1.37722	up	0
NEG_7928	Isorhamnetin-3-O-glucoside	Flavonoids	Flavonoid glycosides	25022.9	24563.7	22806.7	35011.3	21349.1	49342.7	1386.5	1301.34	1494.83	1657.87	1755.97	2140.57	1.25002	0.00017866	0.00051092	18.8647	4.23762	up	0
NEG_6682	Avicularin	Flavonoids	Flavonoid glycosides	26079.8	37406.8	38715.2	43560.3	28168.4	73415.3	8762.94	7293.01	7562.71	6447.44	6782.1	7313.04	1.21683	0.00049532	0.001262	6.01251	2.58797	up	0
NEG_8680	Phosphatidylcholine lyso 18:2	Glycerophospholipids	Glycerophosphocholines	880023	27226.8	29976.2	94749.5	34809.1	19568.2	62562.6	124178	97777	84602.8	93673.1	92838.6	1.03853	0.0082273	0.016053	0.445613	-1.16614	down	0
NEG_5852	Scopolin	Coumarins and derivatives	Coumarin glycosides	63126	53166	44214.1	51930.4	40543.5	52777.5	24957.4	21744.1	24018.1	23849.5	24028	24469.1	1.33174	2.6872e-06	1.3943e-05	2.03513	1.02512	up	0
NEG_7426	(-)-Podophyllotoxin	Others	0	5803.48	5740.74	6864.46	7396.27	5670.38	7556.52	3641.18	3041.08	3068.47	2841.95	3178.08	3014.95	1.31289	7.1313e-06	3.0948e-05	2.12256	1.0858	up	0
NEG_10119	[2-Hydroxy-3-[3,4,5-trihydroxy-6-(hydroxymethyl)oxan-2-yl]oxypropyl] octadeca-9,12-dienoate	Glycerolipids	Glycosylglycerols	99170.3	2276.37	2602.42	9666.92	2712.04	2615.9	7651.15	15687.5	12410.6	9837.44	12678.4	12801.2	1.14293	0.0017487	0.0038777	0.335582	-1.57526	down	0
NEG_14415	[3,4-Dihydroxy-6-[5-hydroxy-2-(4-hydroxyphenyl)-4-oxo-7-[3,4,5-trihydroxy-6-(hydroxymethyl)oxan-2-yl]oxychromen-3-yl]oxy-5-[(2S,3R,4R,5R,6S)-3,4,5-trihydroxy-6-methyloxan-2-yl]oxyoxan-2-yl]methyl acetate	Flavonoids	Flavonoid glycosides	10192	10417.8	10046.4	9928.82	8577.83	19387.6	4135.03	3843.47	3675.7	2086.5	4124.31	4360.25	1.16141	0.0016733	0.003728	3.1509	1.65576	up	0
NEG_1060	4-Methoxycinnamic acid	Cinnamic acids and derivatives	Cinnamic acids	13346.6	10002.1	10152.7	11594.7	9189.41	11894.3	3357.67	2340.97	2693.65	2914.96	3301.02	3710.13	1.35316	1.3767e-07	1.2373e-06	3.46105	1.79121	up	0
NEG_11127	5-Hydroxy-2-(3-hydroxy-4-methoxyphenyl)-7-[(2S,3R,4S,5S,6R)-3,4,5-trihydroxy-6-[[(2R,3R,4R,5R,6S)-3,4,5-trihydroxy-6-methyloxan-2-yl]oxymethyl]oxan-2-yl]oxy-2,3-dihydrochromen-4-one	Flavonoids	Flavonoid glycosides	38100.2	19855.2	25801	34194.2	20386.9	43289.7	1712.4	868.444	902.788	437.05	268.437	301.015	1.27345	6.8882e-05	0.00022218	38.3583	5.26147	up	0
NEG_4403	Bavachalcone	Others	0	22682.5	20895.6	18304.6	25680.5	17039.6	32862.1	4231.63	3428.16	4077.05	3783	4003.56	4647.51	1.28531	4.8144e-05	0.00016472	5.69866	2.51062	up	0
NEG_6616	Cosmosiin	Flavonoids	Flavonoid glycosides	27563.8	25586.1	24547.3	25164.3	22258.8	28443	9088.38	8334.88	7953.03	8454.97	8925.19	8288.98	1.36876	2.081e-08	3.3172e-07	2.96209	1.56661	up	C04608
NEG_7055	Cynaroside	Others	0	20937.7	25954.6	20369.8	34779.5	35878.5	27617.2	9944.79	13322.4	6646.29	4554.53	9680.82	3890.03	1.2635	7.8681e-05	0.00024795	3.61206	1.85282	up	0
NEG_6269	Liquiritin	Others	0	15164	13273.2	10860.2	16348	11510.3	15552.6	5670.16	4510.21	4762.09	4348.05	5609.93	5393.76	1.3016	1.5179e-05	5.8871e-05	2.67551	1.41982	up	0
NEG_7981	Myricetin-3-O-galactoside	Flavonoids	Flavonoid glycosides	12727	18447.3	15696	23391.4	12297.9	26242.6	381.844	310.205	251.482	651.412	565.877	134.9	1.30553	1.7262e-05	6.5105e-05	50.2185	5.65015	up	0
NEG_3966	Neobavaisoflavone	Isoflavonoids	Isoflav-2-enes	35229.4	3521.15	2986.91	6349.3	4223	1945.09	18834.6	22477.6	21851.6	20636.1	23589.4	22678.1	1.36519	2.8135e-08	4.0839e-07	0.175528	-2.51023	down	0
NEG_2636	Nordazepam	Organoheterocyclic compounds	1,4-benzodiazepines	10433.9	9546.32	8149.81	9346.04	8506.3	9328.57	214.686	110.544	79.1521	142.725	78.938	220.603	1.3789	5.3627e-11	5.1375e-09	63.6051	5.99107	up	C07486
NEG_13713	Quercetin 3-O-[2''-O-(6'''-O-p-coumaroyl)-b-D-glucopyranosyl]-a-L-rhamnopyranoside	Others	0	24948.7	21594.5	27709.8	39543.9	26407.3	43327.8	120.253	56.5269	63.6778	49.9338	88.0596	99.4228	1.30403	1.4045e-05	5.5652e-05	398.216	8.63741	up	0
NEG_11423	Quercetin 3,4'-diglucoside	Flavonoids	Flavonoid glycosides	32034.5	35142.1	23743.3	31329.5	27810.5	35834.9	9298.1	5755.74	8245.21	7212.84	8128.89	7850.94	1.33821	1.7904e-06	9.8694e-06	3.97125	1.98959	up	0
NEG_11809	Quercetin 5-Glc-Rha	Flavonoids	Flavonoid glycosides	26402.2	20477.3	22108.6	26748.4	14775.4	22483	1475.56	1617.52	938.631	648.891	1074.08	1437.52	1.33609	1.14e-06	6.6593e-06	17.7847	4.15257	up	C17563
NEG_1812	Sinapic acid	Cinnamic acids and derivatives	Hydroxycinnamic acids and derivatives	24746.3	30050.3	31452.7	28614.5	29380.2	32076.8	14494.7	13139.1	12292.8	13117.2	13116.5	11968.2	1.37531	1.4247e-09	4.9054e-08	2.32807	1.21914	up	C00482
NEG_7537	Spiraeoside	Flavonoids	Flavonoid glycosides	48834.6	34492.7	30139.4	37460.8	26535.7	41888.9	13640.3	11935.3	10688.7	12288.9	11511.4	12110.1	1.31733	9.0464e-06	3.7845e-05	2.83511	1.5034	up	0
NEG_12189	Syrosingopine	Alkaloids and derivatives	0	23162.5	24943.7	22244	28357	21339.7	33984.3	4894.78	4425.66	4514	5032.05	4372.52	4513.87	1.33422	2.6925e-06	1.3943e-05	5.65867	2.50046	up	0
NEG_588	Vanillin	Phenols	Methoxyphenols	24482.2	20871.4	20153.5	25512.5	20201.3	26129.3	3871.45	4623.64	3998.71	4122.52	4294.3	3661.65	1.35871	9.9999e-08	9.6416e-07	5.51207	2.46259	up	C00755
POS_3124	Hydrocinchonine	Alkaloids and derivatives	0	118411	92501	104246	96899.2	93586.1	108332	599313	507555	549738	532229	537940	537480	1.37833	1.5097e-10	7.612e-09	0.182179	-2.45657	down	0
POS_4718	(4-Hydroxy-3,5-dimethoxyphenyl)methyl-beta-D-glucopyranoside	Organooxygen compounds	Carbohydrates and carbohydrate conjugates	301027	262331	218014	332495	235600	329407	56851.6	51127.6	54083.9	53039.2	48707.2	54408.4	1.33023	2.6045e-06	1.3709e-05	5.19588	2.37737	up	0
POS_10345	Asteriaceramide A	Others	0	61622.4	33922.1	36879.8	46119.1	63843.6	30788	113412	173595	175863	138723	175170	161987	1.3112	8.37e-06	3.548e-05	0.270424	-1.88671	down	0
POS_6265	(5-Benzoyloxy-4,6-dihydroxy-3-methoxycyclohexen-1-yl)methyl benzoate	Benzenoids	Benzoic acids and derivatives	75936.9	63597.4	58981.3	78425.6	61152.6	84410.8	2269.84	1655.78	2054.79	2532.53	1714.09	2347.81	1.35673	1.3949e-07	1.2373e-06	33.0721	5.04754	up	0
POS_7113	[1-[2-Aminoethoxy(hydroxy)phosphoryl]oxy-3-hydroxypropan-2-yl] octadeca-6,9,12-trienoate	Glycerophospholipids	Glycerophosphoethanolamines	115526	102208	105276	118404	101342	117013	60024.2	48901	52922	52759.3	53506.9	53923.9	1.35256	1.183e-07	1.1003e-06	2.02799	1.02005	up	0
POS_7078	[5-Ethenyl-3-hydroxy-4-(3-hydroxyprop-1-en-2-yl)-2-(3-methoxy-3-oxoprop-1-en-2-yl)-5-methylcyclohexyl] 4-acetyloxy-3-hydroxy-2-methylidenebutanoate	Prenol lipids	Sesquiterpenoids	90758.9	87448.5	84496	95453.7	75975.9	101861	18460	14950.2	16672.3	16243.7	14811.4	18135.9	1.36526	2.6423e-08	3.9552e-07	5.38184	2.4281	up	0
POS_641	2-Hydroxyquinoline	Organoheterocyclic compounds	Quinolones and derivatives	243742	154706	138351	276894	155349	316144	54620	36665.9	44172.1	49257.8	38396.7	39691.3	1.18674	0.00079573	0.0019154	4.75534	2.24955	up	0
POS_1576	2,3-Dihydro-3-hydroxy-2-oxo-1H-indole-3-acetic acid	Organoheterocyclic compounds	Indolyl carboxylic acids and derivatives	230130	114139	100035	254695	108582	270999	49651.6	24933.1	40548.4	42338.3	32213.6	37043.1	1.08798	0.004198	0.0087238	4.49055	2.16689	up	0
POS_4537	5,7,3'-Trihydroxy-6,4',5'-trimethoxyflavone	Others	0	171522	141951	142534	173280	140930	187247	5779.3	5388.84	5753.25	5215.01	5096.85	5003.59	1.36424	3.131e-08	4.2849e-07	29.256	4.87066	up	0
POS_2704	alpha-Naphthoflavone	Flavonoids	Flavones	4279.95	97564	107542	5368.95	10725.8	3727.87	125688	119473	116801	110161	124150	129586	1.05178	0.0064007	0.012814	0.371858	-1.42718	down	0
POS_2216	D-Pantothenic acid	Carboxylic acids and derivatives	Amino acids, peptides, and analogues	1.16397e+06	947659	885958	1.15708e+06	733309	1.15413e+06	428986	306938	379640	328151	384053	387135	1.29443	2.28e-05	8.4008e-05	2.64292	1.40213	up	0
POS_6012	Lupenone	Others	0	213546	311318	352121	152225	362926	117470	140450	87439.9	104152	116593	44264.2	96757.2	1.0111	0.0094175	0.018111	2.63762	1.39924	up	0
POS_1458	Methylecgonine	Alkaloids and derivatives	0	92430.5	77795	60408	99515	76250.5	99707.4	9875.93	8744.99	8974.65	10132.4	8760.07	7767.92	1.33435	1.8478e-06	1.0001e-05	9.14913	3.19363	up	0
POS_6965	Phenethyl sophoroside	Organooxygen compounds	Carbohydrates and carbohydrate conjugates	114309	104977	96927.6	106170	96364.1	107187	30339.1	23953	27535.6	27749.2	24876.6	25972.5	1.37703	1.3784e-10	7.3829e-09	3.82702	1.93622	up	0
POS_9809	Toosendanin	Others	0	186557	168679	157057	190137	167521	204373	27688.1	21138.7	27783.4	25792.5	26214.2	24500.4	1.36788	1.1885e-08	2.1484e-07	6.95749	2.79857	up	0
POS_6623	4'-O-b-D-Glucosyl-5-O-methylvisamminol	Organoheterocyclic compounds	1-benzopyrans	61835.8	53864.9	53010.8	59875.5	55098.1	66510.9	27404.5	24873.9	30068.6	31273.5	27460.9	26464.2	1.3433	8.3095e-07	5.0383e-06	2.0653	1.04635	up	0
POS_5055	6-{5a,11-dimethyl-1H,2H,3H,4H,5H,6H,7H,8H,9H,9aH-cyclopenta[a]phenanthren-1-yl}-2,3-dimethylheptane	Others	0	105800	65929.7	77719.3	45198.6	85135.2	32089.4	126729	125767	120802	125054	130503	136248	1.28311	5.3756e-05	0.00017944	0.480054	-1.05873	down	0
POS_4681	3-[3-hydroxy-2-[(2S,3R,4S,5S,6R)-3,4,5-trihydroxy-6-(hydroxymethyl)oxan-2-yl]oxyphenyl]propanoic acid	Organooxygen compounds	Carbohydrates and carbohydrate conjugates	166310	154000	150750	165221	157670	168823	72129.1	57554.2	63484.1	59854.5	59777	66267.4	1.37069	1.4337e-09	4.9054e-08	2.52137	1.33421	up	0
POS_4308	Bartsioside	Prenol lipids	Terpene glycosides	66780.5	68730.3	61927.5	64454.1	64472	65311.5	15544	11625.1	15799.5	10362.1	10806.4	9987.23	1.37783	7.9814e-11	6.3718e-09	5.25984	2.39502	up	0
POS_6081	Majdine	Organoheterocyclic compounds	0	6969.17	7813.52	8212.87	5604.31	7470.85	6403.86	51032.7	46076.5	48334.3	48010.3	46852.9	52864.1	1.37913	9.2647e-11	6.8274e-09	0.14533	-2.7826	down	0
POS_2926	2,3-Dihydroxypropyl tetradecanoate	Glycerolipids	Monoradylglycerols	14977.8	16531.8	14477.7	11831.5	21394.1	6678.14	52093.5	36561.3	36337.4	37515.3	33040	40829.2	1.27339	8.5139e-05	0.00026568	0.359997	-1.47394	down	0
POS_5026	3-[2-Methoxy-3-[(2S,3R,4S,5S,6R)-3,4,5-trihydroxy-6-(hydroxymethyl)oxan-2-yl]oxyphenyl]propanoic acid	Organooxygen compounds	Carbohydrates and carbohydrate conjugates	28390.2	20477	27383.7	30679.4	25904	35829.7	7204.43	5184.52	5129.6	5581.99	5584.46	5432.04	1.32019	4.9476e-06	2.2464e-05	4.93389	2.30272	up	0
POS_5374	3,5,5-Trimethyl-4-[3-[(beta-D-glucopyranosyl)oxy]butyl]-3-cyclohexen-1-ol	Fatty Acyls	Fatty acyl glycosides	23367.6	17921.7	19626.1	16335.4	15380.1	26050.9	9884.7	8578.86	8386.07	8989.07	5779.7	10232.4	1.23328	0.00031915	0.00086125	2.2059	1.14137	up	0
POS_8212	cyclo[DL-Ala-DL-Trp-DL-Ala-DL-Val-Gly]	Carboxylic acids and derivatives	Amino acids, peptides, and analogues	22306.6	20247.9	19073.6	23426.1	17420	24323.2	7712.63	5501.74	5216.6	5402.49	5641.35	5824.92	1.34322	7.5072e-07	4.7006e-06	3.55215	1.82869	up	0
POS_2253	Cytidine	Nucleosides, nucleotides, and analogues	0	25362.8	21091.2	15440.9	26204.6	19167.4	26270.7	6222.51	5475.02	5867.9	6541.59	6149.07	6265.83	1.30152	1.7802e-05	6.6879e-05	3.55429	1.82956	up	0
POS_5322	Diflufenican	Benzenoids	Anilides	29811.9	32160.7	30166.6	28187.1	21773.1	27439.6	2164.49	2512.04	2840.84	2117.34	371.757	2533.03	1.36096	6.8418e-08	7.3645e-07	13.3715	3.74109	up	0
POS_5737	Gardneramine	Organoheterocyclic compounds	Indoles	5492.76	4265.27	5184.43	7110.64	3995.22	7266.38	12992.3	15751.6	16488.1	10762.6	16662.2	17290.8	1.27517	5.2167e-05	0.00017474	0.371181	-1.4298	down	0
POS_8334	Hypocrellin B	Others	0	17990	17806.9	18041.8	13429.8	20136.8	19843.2	8219.9	8399.77	8128.23	8871.84	8057.55	7818.56	1.31689	1.0547e-05	4.3181e-05	2.16403	1.11372	up	0
POS_5071	Jaceidin	Flavonoids	O-methylated flavonoids	23971	47181.1	44472.3	60004.9	35283.7	57105.1	27054.8	16548	21301.6	17014.4	21809.1	21123.7	1.24927	0.00012691	0.0003736	2.34566	1.22999	up	0
POS_7964	Lyalosidic acid	Prenol lipids	Terpene glycosides	35326.2	29235.1	27699.5	35527.1	27916.3	37776.6	1609.69	1137.07	1150.58	1168.1	986.698	971.325	1.36113	6.1997e-08	6.8606e-07	27.0219	4.75606	up	0
POS_4026	Papaverine	Organoheterocyclic compounds	Benzylisoquinolines	4366.96	4151.16	3503.47	4008.62	2493.15	4126.93	16135	12287.3	12216.2	13755.3	13639.4	13916.6	1.35523	1.7883e-07	1.4897e-06	0.267723	-1.90119	down	0
POS_12025	Ritonavir	Carboxylic acids and derivatives	Amino acids, peptides, and analogues	48991.8	38230.7	37153.2	46232.3	32205.4	39645.7	6344.77	5125.96	4869.14	5764.35	5331.08	4742.87	1.35765	5.8526e-08	6.7418e-07	7.21501	2.851	up	C07240
POS_4076	Sulpiride	Benzenoids	Benzenesulfonamides	2196.97	2521.25	1903.38	2377.87	1217.69	2302.74	7891.76	6778.56	6639.61	5335.03	7292.13	5944.99	1.32087	4.0298e-06	1.9303e-05	0.310607	-1.68684	down	0
POS_8369	Xolegel	Organoheterocyclic compounds	Piperazines	18414.7	23000.4	20296.4	20572.6	22610.6	20626.2	8038.39	7136.5	8387.78	8478.86	5886.69	8393.41	1.36625	1.0114e-08	1.9377e-07	2.77469	1.47233	up	0
NEG_14002	Quercetin 3-rutinoside 7-galactoside	Flavonoids	Flavonoid glycosides	147604	225200	209481	257696	198817	310550	15518.7	14593	15813.4	15851.5	14973.3	15220.3	1.34887	5.9904e-07	3.9299e-06	15.6801	3.97087	up	0
NEG_770	Umbelliferone	Coumarins and derivatives	Hydroxycoumarins	47674.9	47478.2	44631.9	46771.1	40073.8	48585.2	125681	105410	115275	119939	108809	113863	1.3679	1.2179e-08	2.1607e-07	0.396306	-1.33531	down	C09315
NEG_9603	2-[3-[4-[1,3-Dihydroxy-1-(4-hydroxy-3-methoxyphenyl)propan-2-yl]oxy-3-methoxyphenyl]propoxy]-6-(hydroxymethyl)oxane-3,4,5-triol	Lignans, neolignans and related compounds	0	545659	534752	498742	577251	484657	587912	166213	136054	150437	152835	152248	147758	1.36867	8.0733e-09	1.7578e-07	3.55581	1.83018	up	0
NEG_7422	Parishin E	Others	0	276050	405419	414173	537777	328087	618798	48324.1	40190.6	45451.1	44045.4	43629.3	45011.6	1.3148	9.3875e-06	3.8932e-05	10.3697	3.3743	up	0
NEG_4870	3-(2-Glucosyloxy-4-methoxyphenyl)propanoic acid	Organooxygen compounds	Carbohydrates and carbohydrate conjugates	92331.5	104988	72996.1	87825	71050.5	84902	8053.53	7669.58	8038.31	8562.45	7738.49	7797.15	1.35551	2.2277e-07	1.7348e-06	10.575	3.40258	up	0
NEG_3233	Cianidanol	Flavonoids	Flavans	163590	133491	126546	163429	130449	134490	59191.1	51736.5	56899.3	55240.3	55299.6	56183	1.3438	2.7144e-07	2.0126e-06	2.46926	1.30408	up	C06562
NEG_4388	Coumaroyl quinic acid	Organooxygen compounds	Alcohols and polyols	1.91215e+06	1.66368e+06	1.53777e+06	2.11721e+06	1.45045e+06	2.87257e+06	103257	82709	91503.2	96781.1	90113.4	91591.7	1.29747	2.8611e-05	0.00010343	20.8112	4.37929	up	0
NEG_1262	Quinic acid	Organooxygen compounds	Alcohols and polyols	333788	289299	269586	374375	255057	505656	23112	19285.9	20046.6	22453.3	19931.9	21153.8	1.29325	3.4676e-05	0.00012124	16.1353	4.01215	up	C00296
NEG_3581	Sulfo jasmonate	Fatty Acyls	Lineolic acids and derivatives	82844.7	219298	151782	211650	145178	288045	6248.41	7823.39	8263.74	9133.81	8520.11	8700.1	1.31121	1.6406e-05	6.2619e-05	25.0394	4.64613	up	0
NEG_3039	Xanthosine	Nucleosides, nucleotides, and analogues	0	44495.8	61885.7	53728.6	72518.1	53976	81140.2	35103.5	27691.5	31820.5	36101.7	31653.4	30967.6	1.25894	0.00011832	0.00035311	2.00634	1.00457	up	C01762
NEG_11728	[6-(Furan-3-yl)-6,8,12,16,21-pentahydroxy-7,15-dimethyl-9-oxo-3,17,19-trioxaheptacyclo[9.9.3.01,10.02,4.02,7.011,18.015,23]tricosan-14-yl] 2-methylbutanoate	Prenol lipids	Triterpenoids	42338.4	11494.7	10472.7	13145.9	10537.9	9219.23	4442.19	3579.66	3791.41	2623.28	3879.76	3538.84	1.328	1.2556e-06	7.2902e-06	3.01277	1.59109	up	0
NEG_4107	3-Hydroxy-N-(2-oxooxolan-3-yl)tetradecanamide	Carboxylic acids and derivatives	Amino acids, peptides, and analogues	40368.8	44753.4	37609.5	43654	38061.8	48956.3	11952.6	11618.2	11297.4	11501.3	10549.7	11214.9	1.36471	6.1754e-08	6.8606e-07	3.75206	1.90768	up	0
NEG_4646	3'-Adenylic acid	Nucleosides, nucleotides, and analogues	0	9910.91	9856.18	10216.3	12094	10000.9	13584.4	6535.36	5143.75	6052.41	5453.4	5086.23	5080.98	1.29355	2.6252e-05	9.5989e-05	2.00594	1.00428	up	C01367
NEG_518	4-Hydroxyquinoline	Organoheterocyclic compounds	Quinolones and derivatives	25466.2	25702.1	24733.3	30079.5	24055.1	30193.4	12064.5	10851.5	10985.9	11677.7	10974.1	11532.3	1.34694	4.3608e-07	2.984e-06	2.37518	1.24804	up	0
NEG_2369	9-Hexadecenoic acid	Fatty Acyls	Fatty acids and conjugates	105560	9455.99	8920.04	24159.4	8157.94	8695.2	23819.5	45705.4	39593	27314.9	38868.8	33600.7	1.18018	0.00078506	0.0018944	0.341146	-1.55154	down	0
NEG_4174	Adenosine 2',3'-cyclic phosphate	Nucleosides, nucleotides, and analogues	Cyclic purine nucleotides	13242.3	9848.24	9160.87	15093.2	9533.07	16037.7	6433.68	4172.75	5133.81	6886.94	4911.82	5118.62	1.15619	0.0013702	0.0031031	2.19269	1.1327	up	0
NEG_2682	Arbutin	Others	0	12258.3	10247.7	9819.22	11839.5	10396.2	11997.3	4115.23	3618.75	3688.26	3299.8	3654.96	3693.15	1.36208	3.3683e-08	4.4817e-07	2.95238	1.56188	up	0
NEG_14001	Flavonol base + 4O, O-Hex-Hex, O-dHex	Flavonoids	Flavonoid glycosides	20854.2	19259.3	18123.3	16605.1	13802.4	19786.6	4027.62	3755.42	5479.89	1484.59	4783.99	4449.28	1.34482	9.3166e-07	5.5436e-06	4.38231	2.13169	up	0
NEG_1257	Hydron;2-hydroxypropane-1,2,3-tricarboxylate	Carboxylic acids and derivatives	Tricarboxylic acids and derivatives	8633.64	30434	33488.2	24810.7	24759.4	34684	2785.96	1861.68	1655.7	546.724	1368.96	1971.32	1.35979	1.4873e-07	1.3072e-06	17.449	4.12507	up	0
NEG_412	Hydron;pentanedioate	Carboxylic acids and derivatives	Dicarboxylic acids and derivatives	50358.2	45665.2	48600.2	68263.7	46326.3	79286.9	27324.7	19348.8	21206.8	31030.1	21269.6	25111	1.19779	0.00060245	0.0014913	2.37988	1.25089	up	0
NEG_1221	Kynurenic acid	Organoheterocyclic compounds	Quinoline carboxylic acids	10689.7	10829.4	10697.2	11943.7	10319.3	12362.3	4675.59	4798.14	4743.67	4941.76	4562.37	4686.56	1.36644	2.1446e-08	3.3172e-07	2.37192	1.24605	up	C01717
NEG_11393	Narcissin	Flavonoids	Flavonoid glycosides	31641.7	29895.8	27989.9	32390.4	24321.2	35589.9	3717.09	3167.84	3026.21	1778.78	3450.77	3271.13	1.3606	9.1104e-08	9.0914e-07	9.78857	3.2911	up	0
NEG_5790	Propoxycarbazone	Benzenoids	Benzoic acids and derivatives	32385.3	27480.2	34758.3	28867.2	31806.5	28874.9	4110.6	3469.13	3462.43	2957.87	3669.44	3837.27	1.36691	3.2797e-09	8.6958e-08	8.46883	3.08216	up	0
NEG_996	trans-Aconitic acid	Carboxylic acids and derivatives	Tricarboxylic acids and derivatives	18982.5	28074.5	28725	35559.7	21635.9	37071.6	2869.54	2836.98	2587.56	2807.66	2964.24	2899.87	1.33558	1.7926e-06	9.8694e-06	10.685	3.41752	up	C02341
NEG_11401	Verbascoside	Others	0	45686.8	49060.5	45711.6	42905.1	51288.5	42601.1	12337.8	11614.5	12038.4	12846.1	12545.3	12164.7	1.36865	3.9548e-09	9.2408e-08	3.77829	1.91773	up	0
POS_10544	Thalsimine	Tannins	0	80434.4	67439.3	78013.7	77217.7	67765.6	95657.1	201665	190347	203050	199037	181794	179487	1.36002	2.7715e-08	4.0839e-07	0.401011	-1.31829	down	0
POS_598	Trigonelline	Others	0	1.64445e+06	1.66103e+06	1.17857e+06	1.09763e+06	1.24234e+06	1.4959e+06	205264	766335	518174	735098	477058	162108	1.24938	0.00027702	0.00075546	2.79697	1.48386	up	C01004
POS_9127	7-[3-[(2R,3R,4R)-3,4-Dihydroxy-4-(hydroxymethyl)oxolan-2-yl]oxy-4,5-dihydroxy-6-(hydroxymethyl)oxan-2-yl]oxy-3-(4-methoxyphenyl)chromen-4-one	Isoflavonoids	Isoflavonoid O-glycosides	212627	147680	118395	186001	69374.7	92952.1	33149.8	24854.4	40967.2	46054.4	51581.3	36790.6	1.13478	0.0016518	0.0036973	3.15896	1.65945	up	0
POS_3745	Tetrahydrosappanone A Trimethyl Ether	Others	0	121730	108117	103976	124022	93217.1	123994	49917.6	40402.2	41424.7	41785.6	42397.1	44142.6	1.34193	7.6469e-07	4.757e-06	2.5531	1.35225	up	0
POS_9511	Vitexin 2''-O-rhamnoside	Flavonoids	Flavonoid glycosides	176870	179598	155181	188261	171419	199167	86583.2	74690.7	80983.1	77557.8	79460.9	78638.6	1.35503	1.8294e-07	1.5108e-06	2.24381	1.16595	up	0
POS_4619	Sucrose	Organooxygen compounds	Carbohydrates and carbohydrate conjugates	191950	185642	208960	237251	176253	179295	134288	57756.5	89398	58965.1	40079.9	91577.7	1.23813	0.00011802	0.00035311	2.50998	1.32767	up	C00089
POS_6221	6-O-Isobutyryl-alpha-D-glucopyranosyl alpha-D-glucopyranoside	Organooxygen compounds	Carbohydrates and carbohydrate conjugates	59312.4	49868.8	45676.5	56654.8	48297.7	64645	5488.45	5328.61	6464.88	6188.01	5039.53	6097.24	1.36011	9.8333e-08	9.6125e-07	9.19371	3.20065	up	0
POS_5615	Khelloside	Organoheterocyclic compounds	1-benzopyrans	139820	118132	133870	148771	112986	153107	76961.4	58140.8	62787.9	65847.3	61538.1	63795.8	1.30702	1.0124e-05	4.1806e-05	2.05681	1.04041	up	0
POS_1034	N3-Methyl-L-histidine	Carboxylic acids and derivatives	Amino acids, peptides, and analogues	59547.7	58502.9	43497.3	54905.9	49088.4	55902.2	17449.9	21487.6	15087.4	20822.2	19274.7	15127.2	1.35188	5.5769e-07	3.7245e-06	2.8767	1.52442	up	0
POS_10737	(15S,16Z,17S)-16-ethylidene-4-hydroxy-15-[(2S,3R,4S,5S,6R)-3,4,5-trihydroxy-6-(hydroxymethyl)oxan-2-yl]oxy-2,10,14,20-tetraoxatetracyclo[21.2.2.13,7.012,17]octacosa-1(25),3,5,7(28),12,23,26-heptaene-11,19-dione	Others	0	14217.9	10676.4	10663.5	7107.75	8374.38	10918.6	14106.2	12974.1	21799.5	30595.2	18784.5	27829.7	1.04982	0.0070409	0.013936	0.45436	-1.13809	down	0
POS_6035	[1-(3,4-Dihydroxy-5-methoxyphenyl)-7-(3,4-dihydroxyphenyl)heptan-3-yl] acetate	Others	Linear diarylheptanoids	9774.03	12824	10211.3	14416.5	13674.1	12004.2	42937	35233.7	36803.7	36294	35648.6	36670.4	1.36584	3.6046e-08	4.6665e-07	0.338822	-1.5614	down	0
POS_10537	2-(beta-D-Glucopyranosyloxy)benzyl-3-(hexopyranosyloxy)-6-hydroxy-2-methoxybenzoate	Organooxygen compounds	Carbohydrates and carbohydrate conjugates	9203.23	26820.5	20687.2	12403.1	28140.1	13390.6	8050.47	7250.31	7247.82	7356.08	8492.15	8065.55	1.12698	0.0021988	0.0047875	2.62	1.38956	up	0
POS_5633	4-[4-(beta-D-Glucopyranosyloxy)-2-hydroxy-2,6,6-trimethylcyclohexylidene]-3-buten-2-one	Prenol lipids	Terpene glycosides	26148.6	27156.5	24770.1	27106.9	26085.4	30889.4	66875.1	57506.8	63553.6	61746	64236.8	58269.6	1.3648	1.7246e-08	2.9052e-07	0.43852	-1.18929	down	0
POS_5391	6-{9a,11a-dimethyl-1H,2H,3H,3aH,3bH,4H,8H,9H,9bH,10H,11H-cyclopenta[a]phenanthren-1-yl}-3-ethyl-2-methylheptane	Others	0	1.22504e+06	374798	380257	247256	575772	208126	732229	798629	691564	672145	829809	676462	1.2276	0.00027758	0.00075546	0.487045	-1.03787	down	0
POS_5556	6,7-Dimethoxy-8-(beta-D-glucopyranosyloxy)-2H-1-benzopyran-2-one	Coumarins and derivatives	Coumarin glycosides	6270.54	5815.42	6055.88	6883.84	5608.53	7983	4153.51	3127.39	3089.94	2984.11	3248.86	2737.16	1.28077	5.0855e-05	0.00017108	2.00694	1.005	up	0
POS_3853	8-O-Methylrabelomycin	Others	0	6101.15	5561.97	5663.36	6836.27	5334.99	6864.48	2507.16	2426.03	2259.56	2587.89	2947.04	2652.6	1.33449	1.5595e-06	8.84e-06	2.36105	1.23943	up	0
POS_10077	Cyanin	Flavonoids	Flavonoid glycosides	43606.5	28836.6	24558.5	48576.6	24998.7	60566	5067.09	4105.14	3194.04	9006.73	7139.1	4753.6	1.18235	0.00093865	0.0022258	6.76498	2.75809	up	0
POS_5245	Fraxin	Others	0	36506.6	35298.1	27861.1	34087.5	33388.6	38371	15093.3	11013	14584.2	13490.4	13362.1	11881.4	1.34567	7.1277e-07	4.4923e-06	2.55343	1.35244	up	0
POS_3455	Pantoyl lactone glucoside	Fatty Acyls	Fatty acyl glycosides	13507.7	14122.6	13813.1	14377	11487.9	16132.2	6457.96	5929.87	5696.88	5441.01	5838.08	5912.24	1.34539	8.9742e-07	5.3733e-06	2.37891	1.2503	up	0
POS_5685	Phenyl 6-O-[(2R,3R,4R)-3,4-dihydroxy-4-(hydroxymethyl)tetrahydro-2-furanyl]-beta-D-glucopyranoside	Organooxygen compounds	Carbohydrates and carbohydrate conjugates	38691	41962.9	37514.8	46597.4	45384.3	45571	16535.6	11451.6	14161.3	14570.8	13108.7	14277.1	1.35963	3.0317e-08	4.2278e-07	3.09655	1.63066	up	0
POS_6393	Pomiferin	Isoflavonoids	Isoflavans	20437.5	16329	17535.3	20186.9	13247.6	23270.3	9386.84	7083.06	7388.32	8173.52	9028.45	9875.43	1.23707	0.00021743	0.00061084	2.13374	1.09339	up	C10519
NEG_4756	6:3+6O Fatty acyl hexoside	Fatty Acyls	Fatty acyl glycosides	66299.6	100730	66264.9	62898.5	55127.8	60563.3	8615.83	12760.6	5844.81	8792.83	8347.11	12070.2	1.30273	2.0917e-05	7.7669e-05	7.34862	2.87747	up	0
NEG_8336	2'-Deoxyinosine triphosphate	Nucleosides, nucleotides, and analogues	Purine deoxyribonucleotides	40545.7	36553.5	35882	41441.5	32727.9	44144.6	176602	155695	165373	173668	161724	162678	1.37725	1.3872e-10	7.3829e-09	0.22988	-2.12105	down	0
NEG_998	cis-Aconitic acid	Carboxylic acids and derivatives	Tricarboxylic acids and derivatives	2.06764e+06	5.11334e+06	2.8765e+06	3.15112e+06	2.49029e+06	2.5251e+06	803280	809996	1.15965e+06	888300	946228	742873	1.20783	0.00051247	0.0012988	3.62358	1.85742	up	C00417
NEG_7542	Hyperoside	Flavonoids	Flavonoid glycosides	53044.5	111066	103007	138267	99839	52451	303456	242263	251162	274551	254955	250756	1.33529	3.5117e-06	1.7341e-05	0.383951	-1.38101	down	C10073
NEG_6744	Irisxanthone	Organoheterocyclic compounds	1-benzopyrans	990516	868306	1.04804e+06	901025	864016	856926	14901.3	13224.8	14148.5	14955.7	14080.4	14781.4	1.37212	5.2824e-10	2.4098e-08	63.2591	5.9832	up	0
NEG_280	Maleic acid	Carboxylic acids and derivatives	Dicarboxylic acids and derivatives	280296	510752	444144	320519	507071	458088	1.77556e+06	1.66224e+06	1.9962e+06	821942	1.33011e+06	1.12134e+06	1.18116	0.00074423	0.0018096	0.308785	-1.69533	down	C01384
NEG_3995	URIDINE-5-MONOPHOSPHATE	Others	0	87640	146386	81279.8	96762.8	68180.2	97096.8	227354	217930	372570	234384	249945	218929	1.19986	0.00049893	0.0012678	0.386324	-1.37212	down	0
NEG_6498	Adenosine-3'-5'-diphosphate	Nucleosides, nucleotides, and analogues	Purine ribonucleotides	83718.4	151804	86147.5	100270	71583.7	91283.5	45037.3	45920.4	55451	45280.3	50293.2	39318.9	1.1389	0.002217	0.004816	2.13757	1.09597	up	C00054
NEG_9981	Dronedarone	Organooxygen compounds	Carbonyl compounds	1.3299e+06	27909.7	29265.8	86420.3	30670.8	21535.5	176194	242296	242181	223596	242296	244879	1.34159	9.573e-07	5.6263e-06	0.171324	-2.5452	down	0
NEG_8059	Apigenin-6-C-arabinoside-8-C-glucoside	Lignans, neolignans and related compounds	0	115897	76200.1	62882	77686	112379	88510.2	2339.62	1917.83	2247.82	2539.43	1927.77	1574.64	1.33256	1.7475e-06	9.7332e-06	39.9441	5.31991	up	0
NEG_11221	3-{(E)-2-[4-(beta-D-Glucopyranosyloxy)-2-hydroxyphenyl]vinyl}-5-hydroxyphenyl beta-D-glucopyranoside	Stilbenes	Stilbene glycosides	254751	157060	132342	162204	126711	108320	8583.55	6121.33	6943.24	8085.27	6993.66	7622.06	1.3488	1.582e-07	1.3653e-06	18.5791	4.21561	up	0
NEG_7056	Astragalin	Flavonoids	Flavonoid glycosides	207051	257507	244856	121412	231730	324248	48040.9	39798.6	34652.4	39403.3	35049.9	34507.2	1.27621	9.3584e-05	0.00028552	6.11658	2.61273	up	C12249
NEG_2676	Naringenin	Flavonoids	Flavans	188904	133769	130639	138196	155821	110156	13842.5	12749.3	125236	14011.7	13351.8	12770.3	1.15767	0.0011234	0.0026121	4.17938	2.06329	up	C00509
NEG_99	2-Butyne-1,4-diol	Organooxygen compounds	Alcohols and polyols	834630	2.06303e+06	1.11804e+06	1.24422e+06	982841	1.01815e+06	368076	388061	510846	408947	438823	366831	1.17928	0.00098574	0.0023317	3.10752	1.63576	up	0
NEG_3848	3-O-Methylquercetin	Flavonoids	O-methylated flavonoids	43230	27329.5	28024.6	30517	25591	30117	7231.51	8082.37	6099.05	8347.37	6957.9	6768.19	1.37262	2.3745e-09	6.9247e-08	3.90686	1.96601	up	C04443
NEG_10785	isosakuranetin-7-O-rutinoside	Others	0	107173	35061.4	15542.6	29649.4	84510.4	27733.7	838.774	1048.2	1057.58	1940.67	702.895	446.491	1.04059	0.0069528	0.013819	38.279	5.25848	up	0
NEG_522	(S)-3-Amino-5-methyl-hexanoic acid	Carboxylic acids and derivatives	Amino acids, peptides, and analogues	5435.54	5235.24	4827.59	5134.43	5402.46	5265.49	10107.1	9958.04	10709.7	11359	10808.4	11269.7	1.36887	8.7178e-09	1.7769e-07	0.483372	-1.04879	down	0
NEG_5573	12:4+3O Fatty acyl hexoside	Fatty Acyls	Fatty acyl glycosides	8446.2	9867.59	7933.25	12847.1	7040.82	15029.6	4572.77	4359.2	3340.68	2493.3	4126.78	4350.02	1.17913	0.0010284	0.0024266	2.72183	1.44458	up	0
NEG_418	2-Hydroxy-4-methylvaleric acid	Fatty Acyls	Fatty acids and conjugates	37194.1	37798.9	37919.1	50452.7	33569.1	51029	16691.4	11910	14814.7	15199.3	14042	15112.4	1.29978	1.669e-05	6.3197e-05	2.88168	1.52691	up	0
NEG_617	2,5-Dihydroxybenzoic acid	Benzenoids	Benzoic acids and derivatives	24527.1	27130.5	14585.5	28623.1	30972.6	29352	7103.35	6927.46	4315.17	3017.35	6602.03	7942.66	1.27805	5.0896e-05	0.00017108	4.36662	2.12652	up	C00628
NEG_341	4-Hydroxybenzaldehyde	Organooxygen compounds	Carbonyl compounds	41732.8	43423.5	40768.8	55377	39459.7	71684.4	14418.7	13321.9	15904.7	15240.7	13207.8	16428.7	1.26039	0.00012341	0.00036489	3.39859	1.76493	up	C00633
NEG_2491	alpha-D-Mannose 1-phosphate	Organooxygen compounds	Carbohydrates and carbohydrate conjugates	36000.9	45122.4	47351.5	39586	40167.2	36845.4	15128.2	18394.5	23733.3	14351.7	14048.1	15857.8	1.32761	2.6644e-06	1.3943e-05	2.47145	1.30536	up	C00636
NEG_4140	Androsin	Organooxygen compounds	Carbohydrates and carbohydrate conjugates	39070.8	42378.2	39498.2	40186	38081.6	50370.1	22042.7	20909	20072.8	12737.5	20459.7	19286.3	1.32358	6.8868e-06	3.0126e-05	2.18699	1.12894	up	0
NEG_2639	Galangin	Flavonoids	Flavones	41262.5	8111.73	7993.21	11382.6	7025.89	5528.75	1464.15	2597.44	1644.39	1587.1	2306.38	1696.97	1.25638	7.3644e-05	0.00023517	4.25369	2.08871	up	C10044
NEG_4264	Gallic acid hexoside	Tannins	0	6884.16	4534.91	3908.66	5053.76	3646.51	3565.85	258.211	1021.92	609.781	681.57	667.961	827.967	1.34146	6.1359e-07	3.9717e-06	6.10986	2.61114	up	0
NEG_6328	Isorhapontin	Stilbenes	Stilbene glycosides	14444.2	10981.5	10824.1	14705.7	10459.1	16556.2	4825.92	3485.18	4047.24	4092.95	3897.75	4342.37	1.28859	3.3417e-05	0.00011813	3.08737	1.62638	up	C10266
NEG_6266	Kaempferol-3-O-arabinoside	Others	0	18327.9	6102.54	6566.92	5400.23	892.636	8634.54	415.496	293.823	297.759	224.451	530.115	348.766	1.16337	0.0015267	0.0034253	15.6919	3.97195	up	0
NEG_10281	Mulberroside A	Others	0	8823.64	8862.39	5703.61	8794.87	6265.53	8335.25	39157.5	30404.7	30849.3	33886.2	33905.6	37215.7	1.36239	6.5792e-08	7.1624e-07	0.221759	-2.17294	down	0
NEG_12450	Peonidin 3-(6''-acetyl)glucoside	Lignans, neolignans and related compounds	0	6688.65	6274.4	8821.11	6245.12	7204.84	3951.49	27188.6	29134.8	22576.2	25212.1	23780.9	23310.7	1.35004	2.1755e-07	1.7203e-06	0.257905	-1.95509	down	0

## Sheet: KD VS MS
ID	Name	Class	Subclass	KD-1	KD-2	KD-3	KD-4	KD-5	KD-6	MS-1	MS-2	MS-3	MS-4	MS-5	MS-6	VIP	P_value	FDR	Fold Change	log2(FC)	Type	KEGG
POS_6964	Sucrose 6-benzoate	Organooxygen compounds	Carbohydrates and carbohydrate conjugates	12570.8	13161.5	13044.2	13436.4	13526.9	13541.9	740393	799440	556001	569480	477626	876687	1.30052	7.0172e-06	2.9615e-05	0.019916	-5.65	down	0
NEG_6571	5-{[4-(beta-D-Glucopyranosyloxy)benzyl]oxy}-3-hydroxy-3-methyl-5-oxopentanoic acid	Organooxygen compounds	Carbohydrates and carbohydrate conjugates	75917.8	86347.1	71775.9	74752.6	64879.2	131846	1.419e+06	1.62297e+06	1.29526e+06	1.36549e+06	1.2322e+06	1.91158e+06	1.32222	7.0376e-07	4.8799e-06	0.058274	-4.101	down	0
NEG_7610	(2S,3S)-3,5,7-Trihydroxy-2-[4-hydroxy-3-[(2S,3R,4S,5S,6R)-3,4,5-trihydroxy-6-(hydroxymethyl)oxan-2-yl]oxyphenyl]-2,3-dihydrochromen-4-one	Flavonoids	Flavonoid glycosides	1.32354e+06	1.22984e+06	1.14023e+06	1.36845e+06	1.08791e+06	1.49435e+06	79045.1	87212.3	77314.3	75160.6	71175.9	86803.4	1.33751	2.8452e-08	3.7261e-07	15.911	3.9919	up	0
NEG_6752	Dihydrostilbene base + 3O, 1carboxy, O-Hex	Stilbenes	Stilbene glycosides	233335	196327	164408	226894	157189	234331	30305.1	32228.8	28891	28129.8	25487.3	31294.1	1.31525	9.4721e-07	6.1313e-06	6.6633	2.7362	up	0
NEG_9816	Flavonol base + 4O, O-MalonylHex	Flavonoids	Flavonoid glycosides	742294	766037	735465	965807	595922	1.21043e+06	291205	293363	254668	250095	236867	322212	1.21626	0.0002154	0.00057801	3.1111	1.6374	up	C12638
NEG_7061	Kaempferol 7-O-glucoside	Flavonoids	Flavonoid glycosides	73890.1	49368.2	51517.6	71759.5	52441.6	75952.1	7793.26	13962.6	10281.5	7538.43	7889.1	10930.3	1.29406	4.6548e-06	2.1477e-05	6.1862	2.6291	up	0
NEG_7046	Maritimein	Flavonoids	Flavonoid glycosides	268895	219659	224314	246198	221300	240346	48251.3	57975.9	54441.3	45155	40561.4	52205.2	1.34553	1.4398e-10	6.8968e-09	4.629	2.2107	up	0
NEG_8701	Quercetin-3-O-glucosyl-6''-acetate	Flavonoids	Flavonoid glycosides	4.79546e+06	4.8002e+06	4.82423e+06	6.46362e+06	4.30904e+06	7.36859e+06	1.96569e+06	2.01408e+06	1.85622e+06	1.64888e+06	1.49941e+06	2.29989e+06	1.24115	7.9568e-05	0.00023895	2.9527	1.562	up	0
POS_6508	Luteolin 7-galactoside	Flavonoids	Flavonoid glycosides	2.29637e+07	2.9542e+07	1.134e+07	3.14924e+07	4.23569e+07	2.88929e+07	216593	499267	422970	164827	424732	159434	1.22245	0.00013823	0.00039295	91.295	6.5125	up	0
POS_6506	Plantaginin	Flavonoids	Flavonoid glycosides	1.90741e+07	1.60453e+07	1.84261e+07	1.11522e+07	2.10864e+06	2.1028e+07	465764	370634	267897	360425	174959	500843	1.13629	0.001601	0.0035422	38.548	5.2686	up	0
POS_2946	Fisetin	Flavonoids	Flavones	542582	624206	255273	314789	359214	446207	7003.53	19346.7	13067.2	7492.51	16347.8	8192.09	1.24852	8.886e-05	0.00026274	33.585	5.0697	up	C10041
POS_3227	Quercetin	Flavonoids	Flavones	793553	651722	629512	799701	618026	868811	114529	120635	103774	82708	86371.1	124382	1.32142	3.6931e-07	2.764e-06	6.77	2.7592	up	C00389
NEG_908	4-Methoxysalicylic acid	Benzenoids	Benzoic acids and derivatives	1.00488e+06	803561	796161	1.07729e+06	761355	504767	332862	72410.2	271076	262804	270656	96772.1	1.2047	0.00020055	0.00054427	3.6215	1.8566	up	0
NEG_6754	Coatlin A	Linear 1,3-diarylpropanoids	Chalcones and dihydrochalcones	992310	987175	801868	1.04992e+06	859412	1.15487e+06	104597	110987	95656.7	114387	89689.3	128821	1.33099	1.1916e-07	1.057e-06	9.0414	3.1765	up	0
NEG_7051	Cyanidin 3-O-galactoside	Flavonoids	Flavonoid glycosides	2.43515e+06	3.58644e+06	3.29871e+06	4.90848e+06	1.11927e+06	1.44592e+06	286910	263132	175071	184518	132231	372604	1.08533	0.002548	0.0053296	12.182	3.6066	up	C08647
NEG_7541	Isoquercitrin	Flavonoids	Flavonoid glycosides	5.60256e+06	5.5264e+06	5.32969e+06	5.52083e+06	5.35676e+06	5.82287e+06	1.01475e+06	1.12202e+06	1.00864e+06	1.19782e+06	959787	1.29681e+06	1.3503	6.9201e-12	1.3389e-09	5.0104	2.3249	up	C05623
NEG_7611	Taxifolin-3-glucoside	Flavonoids	Flavonoid glycosides	1.77029e+06	1.52486e+06	1.41679e+06	1.9864e+06	1.31194e+06	2.05784e+06	133746	120681	113147	93719	107652	137939	1.31088	1.378e-06	8.1994e-06	14.086	3.8162	up	0
NEG_1048	2-Isopropylmalic acid	Fatty Acyls	Fatty acids and conjugates	2.05638e+06	2.40545e+06	2.33811e+06	2.85313e+06	2.10459e+06	3.15793e+06	1.07343e+06	1.17927e+06	970632	904568	754663	1.26236e+06	1.26859	2.0055e-05	7.2952e-05	2.5112	1.3284	up	0
NEG_7122	3,5-Dihydroxy-2-(4-hydroxyphenyl)-7-[3,4,5-trihydroxy-6-(hydroxymethyl)oxan-2-yl]oxy-2,3-dihydrochromen-4-one	Flavonoids	Flavonoid glycosides	774014	461880	690409	396630	726288	973482	143032	142174	133943	146138	126426	183930	1.18967	0.00043317	0.0010863	4.4521	2.1545	up	0
NEG_3122	6-Hydroxyapigenin	Flavonoids	Flavones	315302	226376	236013	394693	402259	872712	49074.1	74472.7	52726.2	40751.4	68122.7	53793.2	1.04021	0.0069709	0.01312	7.5484	2.9162	up	C10184
NEG_3129	7,3',4',5'-Tetrahydroxyflavone	Flavonoids	Flavones	207169	382254	122448	194731	636725	301561	4517.72	15418.2	13698.1	11053.9	75170.3	6084.52	1.06346	0.0044389	0.008786	15.604	3.9639	up	0
NEG_10778	Kaempferol-3-Glucoside-3''-Rhamnoside	Flavonoids	Flavonoid glycosides	1.52182e+06	1.34526e+06	1.24668e+06	1.6639e+06	1.12943e+06	1.84112e+06	221951	235485	214066	199386	188275	236951	1.30332	3.0018e-06	1.5378e-05	6.6905	2.7421	up	0
NEG_3523	Morin	Flavonoids	Flavones	2.24855e+06	1.12878e+06	1.09175e+06	1.28377e+06	1.06064e+06	1.22356e+06	408945	414096	384909	381575	342539	399465	1.33629	1.1376e-08	1.9461e-07	2.9792	1.5749	up	C10105
POS_9778	Quercetin 3,7-dirhamnoside	Flavonoids	Flavonoid glycosides	396442	1.19067e+06	573937	807412	342046	983493	121535	130148	82321.5	28687.3	24075.1	45156.9	1.18606	0.00057054	0.0013908	10.828	3.4368	up	0
POS_6167	Pelargonidin-3-O-glucoside	Flavonoids	Flavonoid glycosides	1.56226e+06	651482	123332	1.60127e+06	623353	1.49947e+06	2930.33	3517.48	1923.51	949.642	1482.02	1268.75	1.03807	0.0064703	0.012266	447.22	8.8048	up	0
NEG_10776	Biorobin	Flavonoids	Flavonoid glycosides	1.26747e+06	6.92495e+06	2.86996e+06	893449	3.82036e+06	4.98593e+06	542515	651558	713211	655788	1.05569e+06	682267	1.04845	0.0070015	0.013129	5.4391	2.4434	up	0
NEG_10772	[6-[2-(3,4-Dihydroxyphenyl)-8-hydroxy-4-oxochromen-7-yl]oxy-3,4,5-trihydroxyoxan-2-yl]methyl (E)-3-(4-hydroxyphenyl)prop-2-enoate	Flavonoids	Flavonoid glycosides	285276	465403	547151	354222	723175	319624	9023.09	12902.7	28563.5	9425.78	49357.1	13296.2	1.23673	6.315e-05	0.00019642	23.591	4.5602	up	0
POS_1912	N-(2-Oxooxolan-3-yl)octanamide	Carboxylic acids and derivatives	Amino acids, peptides, and analogues	631731	567265	542073	645240	533423	646035	211763	219699	197974	193701	182479	227675	1.33021	5.8064e-08	6.1806e-07	2.8548	1.5134	up	0
POS_5327	Syringin	Organooxygen compounds	Carbohydrates and carbohydrate conjugates	98220.1	86754.6	81211.8	100597	82982.6	96319.8	333853	360879	294415	308966	287328	375182	1.33254	1.7202e-07	1.4455e-06	0.27412	-1.8671	down	0
POS_5412	[1,3-Dihydroxy-1-(7-methoxy-2-oxochromen-6-yl)-3-methylbutan-2-yl] (E)-2-methylbut-2-enoate	Coumarins and derivatives		59047.3	46868.3	44563.5	49599.4	39123.8	27350.4	139941	88711.6	148506	144260	68627.5	121101	1.17489	0.00069231	0.0016581	0.35015	-1.514	down	0
POS_6356	Ginkgolide C	Others		14759.9	13321.2	14350.9	13866.4	11918.4	14379.7	212187	227050	185022	199267	184475	228258	1.34616	4.4024e-09	1.0293e-07	0.065847	-3.9247	down	0
POS_6223	Mundulone	Isoflavonoids	Isoflavans	37964.7	33301.4	30661.4	31365	36180.2	31884.9	86313.1	84698.9	89277.9	90692.4	80449	98632.8	1.34122	1.438e-08	2.2584e-07	0.3699	-1.4348	down	0
POS_894	6-methoxyquinoline	Others		269669	230405	227213	266124	217681	275937	38433.9	37123.2	31949.4	32564.7	28425.5	38000.5	1.33892	1.0126e-08	1.8304e-07	7.0743	2.8226	up	0
POS_6510	Luteolin-4'-o-glucoside	Flavonoids	Flavonoid glycosides	51787.7	36880.3	21214.7	53664.9	52625.7	42235.7	1580.53	2421.75	1571.43	1480	1407.4	2576.03	1.25001	4.2788e-05	0.00014135	22.465	4.4896	up	0
POS_3983	(3R,5R)-1,3,5-trihydroxy-4-[(E)-3-(4-hydroxyphenyl)acryloyl]oxy-cyclohexanecarboxylic acid	Organooxygen compounds	Alcohols and polyols	84009.7	70642.4	64199	86424	62929.9	79541.8	9571.41	6156.14	13413.3	5599.06	12540.3	16557.8	1.32402	2.3815e-07	1.87e-06	6.8374	2.7734	up	0
POS_8210	Haploperoside C	Coumarins and derivatives	Coumarin glycosides	138960	108104	104108	149400	106486	156792	33437.6	31890.4	24562.1	27224.1	19109.7	37700.3	1.28123	9.9007e-06	3.9356e-05	4.3115	2.1082	up	0
POS_974	1-Deoxynojirimycin	Others		109350	108819	186786	202982	198555	261266	73348.5	96858.4	63216.3	114313	129063	75577	1.09042	0.0031253	0.0063434	2.0821	1.058	up	0
POS_6664	5‐(1‐benzofuran‐2‐yl)‐N,N‐dimethyl‐2‐[4‐(piperazin‐1‐yl)phenyl]‐1,3‐thiazole‐4‐carboxamide	Organoheterocyclic compounds	Piperazines	40271.3	41774.1	34707.7	43965	42989.2	46032.6	9556.19	9062.31	7424.37	8644.17	6898.57	10208.6	1.33537	2.1141e-08	3.1646e-07	4.8531	2.2789	up	0
POS_10392	(1beta,3beta,9xi,11alpha,14xi)-1,3,11-Trihydroxyfurosta-5,20(22),25-trien-27-yl beta-D-glucopyranoside	Steroids and steroid derivatives	Steroidal glycosides	4051.97	3567	4117.67	3932.12	3770.49	3484.23	14235.1	14140	11855.6	12445.9	11913.6	14651.8	1.33913	5.8998e-08	6.211e-07	0.28578	-1.807	down	0
POS_7827	Verrucarin J	Prenol lipids	Sesquiterpenoids	5017.4	4564.03	5117.72	7262.29	5462.82	6082.52	2361.2	2118.25	1607.44	1866.33	2173.69	1414.77	1.27215	1.4614e-05	5.5897e-05	2.9621	1.5666	up	0
POS_12389	(2S,3R,4S,5S,6R)-2-[4-[(3S,3aR,6S,6aR)-6-[3,5-Dimethoxy-4-[(2S,3R,4S,5S,6R)-3,4,5-trihydroxy-6-(hydroxymethyl)oxan-2-yl]oxyphenyl]-1,3,3a,4,6,6a-hexahydrofuro[3,4-c]furan-3-yl]-2,6-dimethoxyphenoxy]-6-(hydroxymethyl)oxane-3,4,5-triol	Lignans, neolignans and related compounds		1145.51	1002.72	724.268	1268.95	675.271	1030.52	14038.9	15560.9	12905.2	13799.3	14304.1	14697.8	1.3487	1.3713e-10	6.8968e-09	0.066139	-3.9184	down	0
POS_5857	(E)-3-(4-Methoxyphenyl)-1-[2,4,6-trimethoxy-3-(3-methylbut-2-enyl)phenyl]prop-2-en-1-one	Linear 1,3-diarylpropanoids	Chalcones and dihydrochalcones	1726.11	1238.97	906.116	1070.65	699.684	715.83	3848.48	3881.77	2748.68	3703.87	4259.39	4709.8	1.29317	5.6472e-06	2.5046e-05	0.24004	-2.0586	down	0
POS_8732	2-(Hydroxymethyl)-6-[5-[3-(hydroxymethyl)-5-(3-hydroxypropyl)-7-methoxy-2,3-dihydro-1-benzofuran-2-yl]-2-methoxyphenoxy]oxane-3,4,5-triol	Flavonoids		26435.3	28948.4	17711.6	24111.4	19102.6	21565.4	11288.3	11690.9	10219.8	11643.9	10027.1	10528.9	1.22534	0.00015308	0.00042879	2.0448	1.032	up	0
POS_6561	2-Phenylethyl 3-O-(4-carboxy-3-hydroxy-3-methylbutanoyl)-beta-D-glucopyranoside	Saccharolipids		19926.1	18474.3	18284.3	23299.6	17047.1	21691.1	3197.35	8832.99	7547.44	7194.58	7105.73	7144.16	1.29216	5.5065e-06	2.4536e-05	2.89	1.5311	up	0
POS_4310	3-(4-Hydroxyphenyl)propanoic acid 3-(4-hydroxy-3-methoxyphenyl)propyl ester	Phenols	Methoxyphenols	28246.6	28488.5	23793	33751.9	30704	37081.4	7869.44	8764.06	6605.64	6068.62	6690.15	8799.33	1.30771	1.5751e-06	8.9284e-06	4.1204	2.0428	up	0
POS_9764	Ergocristam	Alkaloids and derivatives	Lysergic acids and derivatives	3771.61	2594.77	2674.05	3808.78	2482.51	3959.3	837.238	1338.65	1166	759.525	1047.78	1660.72	1.21213	0.00019461	0.00052966	2.7347	1.4514	up	0
POS_4705	Jacobine N-oxide	Others		2701.99	2576.67	2208.49	2628.09	2577.35	2965.11	942.319	615.18	1065.24	267.038	430.548	1028.68	1.29636	3.5229e-06	1.7045e-05	3.5748	1.8379	up	0
POS_7640	Mundulone acetate	Isoflavonoids	Isoflavans	9037	6074.56	5664.37	6098.31	5508.39	7802.11	18478.7	21480.3	16966.4	15581	16347.7	22849.7	1.29179	8.5961e-06	3.4805e-05	0.33461	-1.5794	down	0
POS_1361	Myristicin	Organoheterocyclic compounds		10746.5	7623.72	8367.95	10063.8	8456.82	12456.2	22499.5	22427.8	21299.6	19645	18774.4	23709.1	1.3054	2.5133e-06	1.3157e-05	0.43911	-1.1873	down	C10480
POS_6121	Nodakenin	Coumarins and derivatives	Furanocoumarins	1645.55	2134.39	1185.38	1180.92	2441.22	1376.65	6208.48	7068.82	6521.17	5614.47	6602.24	6409.1	1.32521	1.2871e-07	1.121e-06	0.25979	-1.9446	down	0
POS_7158	Petunidin 3-galactoside	Flavonoids	Flavonoid glycosides	1612.14	906.99	1039.16	870.824	746.753	1155.49	76.2907	66.8057	206.386	208.107	116.796	378.807	1.29061	6.5792e-06	2.8138e-05	5.377	2.4268	up	0
POS_8895	Satratoxin H	Prenol lipids	Sesquiterpenoids	5081.89	5062.16	3522.65	6113.76	3097.41	8515.62	1595.58	2919.42	2561.11	654.18	2648.52	1537.38	1.03662	0.0079095	0.014572	2.6497	1.4058	up	0
POS_1181	Serotonin	Organoheterocyclic compounds	Tryptamines and derivatives	44163.8	30061.6	29399.4	44906.7	26350.2	46061.2	5014.52	4129.56	3349.04	4896.46	2310.59	5489.46	1.27241	1.8822e-05	6.935e-05	8.4215	3.0741	up	C00780
POS_4931	Xanthohumol	Linear 1,3-diarylpropanoids	Chalcones and dihydrochalcones	5472.8	5445.09	5281.94	5945.83	5309.59	7270.97	22801.9	24105.7	19983	20141.4	17178.1	26184.3	1.31197	2.307e-06	1.2278e-05	0.26921	-1.8932	down	C16417
NEG_4515	Lactulose	Organooxygen compounds	Carbohydrates and carbohydrate conjugates	14870.3	24657	28150.4	13015.9	29272.5	24868.9	60338.5	72881	109357	88610.6	55839.3	75292.3	1.19951	0.00027811	0.00072794	0.31138	-1.6832	down	C07064
NEG_8385	(6,6-Dimethylbicyclo[3.1.1]hept-2-yl)methyl 6-O-[(2R,3R,4R)-3,4-dihydroxy-4-(hydroxymethyl)tetrahydro-2-furanyl]-beta-D-glucopyranoside	Prenol lipids	Terpene glycosides	5779.7	4107.39	4140.42	5208.44	4164.14	4264.65	208683	228245	202911	203584	183336	232250	1.34887	1.1767e-09	4.0261e-08	0.020859	-5.5832	down	0
NEG_7090	Pentose-Hexose + C10H17	Prenol lipids	Terpene glycosides	2396.98	3334.14	2836.69	3278.18	2662.53	3556.69	159662	166201	146940	150751	128302	174047	1.34579	6.5726e-09	1.3688e-07	0.020307	-5.6219	down	0
NEG_6381	3-[(7S,8S)-5-Hydroxy-2,2,7,8-tetramethyl-6-oxo-7,8-dihydropyrano[3,2-g]chromen-10-yl]-3-phenylpropanoic acid	Organoheterocyclic compounds	1-benzopyrans	14778.4	13407.9	11228.6	19586.8	10494.7	20749.7	6572.98	7184.35	6282.34	5649.74	4742.68	7852.69	1.11972	0.0017747	0.0038906	2.3655	1.2421	up	0
NEG_8700	3,4,5-Trihydroxy-6-[5-hydroxy-2-(4-hydroxy-3-methoxyphenyl)-3-methoxy-4-oxochromen-7-yl]oxyoxane-2-carboxylic acid	Flavonoids	Flavonoid glycosides	39654.5	44798.8	46211.7	46211.6	49080.8	56622.4	5945.46	6074.5	4796.35	4404.72	5006.51	6387.89	1.34285	3.7767e-09	9.5214e-08	8.9378	3.1599	up	0
NEG_2388	Purpurin	Benzenoids	Anthraquinones	54237.7	65081.5	77299.2	73340.6	51561.6	62187.9	4499.92	6020.56	4630.03	3705.94	4140.08	5080.52	1.32424	1.1255e-07	1.0077e-06	14.081	3.8157	up	0
NEG_3192	Eriodictyol	Flavonoids	Flavans	101383	64346.2	53400.7	81344.1	52919.2	81717.2	8934.69	9297.28	7920.06	9202.58	6706.01	8917.91	1.30101	3.3091e-06	1.6425e-05	7.8557	2.9737	up	C05631
NEG_4146	1-(4-Hydroxyphenyl)-3-[(2R,3R,4S,5S,6R)-3,4,5-trihydroxy-6-(hydroxymethyl)oxan-2-yl]oxypropan-1-one	Fatty Acyls	Fatty acyl glycosides	120031	78620	79692.5	93812.3	72862.2	98791.3	35317.9	30699.7	39465	52016.5	30273.8	31666.4	1.27664	1.674e-05	6.2644e-05	2.3174	1.2125	up	0
NEG_3494	Fenhexamid	Benzenoids	Anilides	73574.5	53796.3	48277.4	53684	50357.5	54238.3	4086.56	5090.28	4379.67	3741.41	3333.04	3844.58	1.35109	8.3859e-12	1.3389e-09	12.765	3.6741	up	0
NEG_7493	Hydrangeifolin I	Organooxygen compounds	Carbohydrates and carbohydrate conjugates	73435.6	71936.4	68715.8	77854.5	65549.3	81148.9	16287.3	16046.7	15021.3	14180.3	13810.5	17060	1.34198	4.4052e-09	1.0293e-07	4.7426	2.2457	up	0
NEG_13716	3-[6-[[(2R,3R,4R,5S,6S)-3,5-Dihydroxy-6-methyl-4-[(2S,3R,4R,5R,6S)-3,4,5-trihydroxy-6-methyloxan-2-yl]oxyoxan-2-yl]oxymethyl]-3,4,5-trihydroxyoxan-2-yl]oxy-2-(3,4-dihydroxyphenyl)-5,7-dihydroxychromen-4-one	Flavonoids	Flavonoid glycosides	46541.4	59931.6	55710.5	61805.7	52156.1	78363	18373.1	18765.1	16122.1	16765.5	15817.4	18683.7	1.30981	1.9991e-06	1.1006e-05	3.5356	1.8219	up	0
NEG_621	3,4-Dihydroxybenzoic acid	Benzenoids	Benzoic acids and derivatives	64416.5	46645.8	46110.7	54812.8	44444.9	58755.2	11173.6	11254.1	12345.2	11201.8	7884.58	10974.8	1.32874	1.1124e-07	1.0062e-06	4.6414	2.2146	up	C00230
NEG_6370	Mangiferin	Organoheterocyclic compounds	1-benzopyrans	42104.2	50579	42989.1	42968.3	41421.8	59444.7	17807.3	17085.4	15360.8	12388.8	13909.1	14044.6	1.30704	3.2344e-06	1.6308e-05	3.1445	1.6529	up	0
NEG_1184	Methyl gallate	Benzenoids	Benzoic acids and derivatives	64360.7	40489.6	34975.1	50442.8	33727.8	50952.4	5750.51	5620.42	4398.55	4435.87	1884.01	5332.82	1.30827	1.512e-06	8.6219e-06	9.2154	3.204	up	0
NEG_4498	Boscalid	Benzenoids	Diphenylmethanes	4525.32	3950.63	3304.82	1582.8	2758.11	4244.2	290.523	902.781	440.217	373.104	349.289	230.633	1.23273	0.00015633	0.00043537	7.3491	2.8776	up	0
NEG_7486	Hispidulin 4'-glucoside	Flavonoids	Flavonoid glycosides	9686.06	8759.2	8042.71	9920.27	8130.83	10023.8	3007.06	3233.67	3401.7	3416.31	2982.93	2886.74	1.32922	1.3938e-07	1.203e-06	2.845	1.5085	up	0
NEG_11397	Isorhamnetin-3-O-galactoside-6''-rhamnoside	Others		16906.2	16286.8	19808.8	23440.5	19042.2	25264.9	4628.87	4815.35	4246.61	4541.71	4435.88	5120.7	1.3065	1.4837e-06	8.6146e-06	4.4842	2.1648	up	0
NEG_8963	Isochlorogenic acid A	Organooxygen compounds	Alcohols and polyols	13133.9	11320	13772.9	9889.96	7237.04	14208.5	2808.6	2130.27	1419.79	2337.06	2179.5	2552.06	1.26664	3.1058e-05	0.00010588	5.043	2.3343	up	0
NEG_4880	Matairesinol	Others		2962.46	319.502	874.558	1967.32	804.075	1201.34	13615.4	17734.3	13663	10979.1	8907.07	17674	1.28008	2.4771e-05	8.7568e-05	0.075087	-3.7353	down	0
NEG_6485	Pentose-Hexose + C5H9	Fatty Acyls	Fatty acyl glycosides	13103.7	11302.6	11654.6	12953.4	10742.7	13788.2	28623.6	27568	24972.8	24374.4	21854.5	28646.2	1.31017	2.4631e-06	1.2965e-05	0.46482	-1.1053	down	0
NEG_10464	Procyanidin B1	Flavonoids	Biflavonoids and polyflavonoids	40062.2	35273.8	37539.9	40016.8	38783.7	37663.3	3903.71	3736.97	2716.15	4088.09	2930.43	4161.83	1.34716	6.5994e-12	1.3389e-09	10.546	3.3986	up	C10221
POS_2462	2-(((R)-2,3-Dihydroxypropyl)phosphoryloxy)-N,N,N-trimethylethanaminium	Glycerophospholipids	Glycerophosphocholines	67733.2	71312.4	52815.6	56820.9	53637.9	64988.8	130772	145331	140597	121376	116468	137296	1.31374	7.8969e-07	5.2536e-06	0.45399	-1.1393	down	0
POS_7044	6-[(4E,6E)-2,3-Dihydroxy-4,6-dimethyl-7-(2,4,5-trimethyl-3,6-dioxabicyclo[3.1.0]hexan-2-yl)hepta-4,6-dien-2-yl]-4-methoxy-3,5-dimethylpyran-2-one	Fatty Acyls	Fatty alcohols	97830	66680.3	59789.9	98837.9	54040.4	119026	35302.9	37222.7	23201.8	28169.6	23999.6	36407.3	1.10646	0.0023192	0.0049373	2.5938	1.3751	up	0
POS_4210	Camptothecin	Alkaloids and derivatives		337055	331159	337999	337684	346219	359373	35176.3	38062.5	33662.7	31744.6	31901	37603.6	1.35178	1.7032e-13	1.6317e-10	9.8723	3.3034	up	0
POS_7767	Catalposide	Organooxygen compounds	Carbohydrates and carbohydrate conjugates	70020.8	61054.8	57720.5	63690.4	53592.4	71791	12468	13011.4	10204.2	10090.2	9977.73	13172.8	1.33679	2.8533e-08	3.7261e-07	5.3598	2.4222	up	0
POS_6079	Isolupalbigenin	Isoflavonoids	Isoflav-2-enes	137387	101610	97503.8	141915	101831	153047	24950.9	24546.4	17998.7	17507.4	16132.8	28309	1.28579	8.3094e-06	3.4165e-05	5.5243	2.4658	up	0
POS_10217	Jaslanceoside A	Prenol lipids	Terpene glycosides	63840.8	57238.7	55106.3	60500.5	53710.6	62854.4	1097.72	1690.32	1092.03	520.529	934.534	1543.47	1.35012	3.8982e-11	3.3792e-09	50.489	5.6579	up	0
POS_7890	Scutellarioside II	Cinnamic acids and derivatives	Hydroxycinnamic acids and derivatives	217464	174082	152702	214047	159583	223958	34375.2	38444.6	32521.1	30848.7	26122.6	40339.4	1.31114	1.1807e-06	7.2974e-06	5.4737	2.4525	up	0
POS_12759	Ginsenoside Rk1	Others		111337	148188	134179	97161.6	140932	73782.5	31595.7	33792	31837.9	30793.1	31483.3	32679.6	1.22934	8.6019e-05	0.00025592	3.7105	1.8916	up	0
POS_6847	Delphinidin 3-glucoside	Flavonoids	Flavonoid glycosides	43961.8	60765.3	52091	40094.2	55668	44213.9	13134.2	13856.5	15197.7	19154.5	19103.6	13516	1.29714	4.7938e-06	2.1869e-05	3.2289	1.6911	up	0
POS_3265	(-)-Epitaxifolin	Flavonoids	Flavans	33916	28759.4	26970.5	34321.3	25915.9	36909.9	3082.2	3732.5	3057.68	2620.83	2777.44	3811.78	1.32655	1.9931e-07	1.6181e-06	9.6137	3.2651	up	0
POS_7252	(2R,3S,4S,5R,6R)-2-[[(2S,3R,4R)-3,4-dihydroxy-4-(hydroxymethyl)oxolan-2-yl]oxymethyl]-6-[4-(4-hydroxyphenyl)butan-2-yloxy]oxane-3,4,5-triol	Fatty Acyls	Fatty acyl glycosides	13220.5	14424.5	12047.6	15521.8	12630.7	13523.9	2671.38	2194.98	3500.37	4137.61	2525.56	3645.84	1.32999	6.3943e-08	6.6584e-07	4.3788	2.1305	up	0
POS_3331	(3S,6R,6As,7S)-6,6a,7,8-tetrahydroxy-3-methyl-3,4,5,6,7,12a-hexahydro-2H-benzo[a]anthracene-1,12-dione	Benzenoids		9533.77	9157.99	10074.6	9159.94	9814.93	9616.54	25559.6	26757.1	24409.7	23672.1	21888.3	26858.9	1.3411	3.2519e-08	3.9548e-07	0.38478	-1.3779	down	0
POS_5686	2-[(2Z)-5-(Hexopyranosyloxy)-2-penten-1-yl]-3-oxo-, (1R,2R)-cyclopentaneacetic acid	Fatty Acyls	Fatty acyl glycosides	39222.8	31654.9	29000.1	42203	27886.8	42264.3	10874.5	11384.7	9143.55	9108.53	8164.98	20949.9	1.22241	0.0001205	0.00034682	2.9818	1.5762	up	0
POS_7253	4-(4-Hydroxyphenyl)-2-butanyl 6-O-[(4xi)-alpha-L-threo-pentofuranosyl]-beta-D-glucopyranoside	Fatty Acyls	Fatty acyl glycosides	16814.6	15022.6	14003.7	15417.3	13204.8	14371.8	2470.22	2612.07	2490.52	2451.55	2154.89	2384.38	1.34774	9.1202e-11	5.8247e-09	5.9343	2.5691	up	0
POS_5851	Cyanidin 3-arabinoside cation	Flavonoids	Flavonoid glycosides	20320	15685.3	18191	23442.3	20671.5	22279.4	1159.36	872.187	547.007	448.107	548.503	1911.19	1.32284	1.2492e-07	1.0979e-06	21.931	4.4549	up	0
POS_9957	Diadinoxanthin A	Prenol lipids	Triterpenoids	21203.7	14597.2	16659.6	19238.5	18376.4	17799.7	7358.51	7126.53	6961.48	7075.01	6242.53	7751.02	1.31334	2.7854e-07	2.1551e-06	2.4463	1.2906	up	0
POS_3412	Dihydroxyoctadecadienoic acid	Fatty Acyls	Lineolic acids and derivatives	8703.74	7608.92	2711.15	7997.82	8379.04	12425.2	36289.2	37149.4	36183.9	31524.6	33055	36633.8	1.32797	7.3659e-08	7.3506e-07	0.22267	-2.167	down	0
POS_5734	Erysubin F	Isoflavonoids	Isoflav-2-enes	3088.54	2985.48	4525.68	3037.4	3037.19	3933.89	29960.8	26547.7	25618.3	24319.5	22768	28354.3	1.34162	1.6642e-08	2.5306e-07	0.13342	-2.9059	down	0
POS_2950	Kaempferol	Flavonoids	Flavones	50413.4	42214.5	46208.2	52789.5	45979.1	60430.8	10435.2	11045.2	9438.59	8933.9	9468.63	11442.9	1.32234	2.9584e-07	2.2673e-06	4.8901	2.2899	up	C05903
POS_4926	Marticin	Others		16484.6	13888.5	11885.2	17905.2	11852.6	17457.7	6651.22	7666.53	6011.06	5899.89	6139.15	7505.36	1.228	0.00012055	0.00034682	2.1966	1.1353	up	0
POS_7271	Thalictricoside	Organooxygen compounds	Carbohydrates and carbohydrate conjugates	10619.7	9372.17	8116.16	10466.2	8322.22	9292.77	1150.38	1554.05	1226.74	971.054	1343.72	1375.98	1.33867	8.8405e-09	1.6938e-07	7.1745	2.8429	up	0
POS_3685	Tiapride	Benzenoids	Benzenesulfonyl compounds	18194.7	17329	16368.1	21884.6	16779.2	19980.1	4927.42	4950.64	4661.12	3436.34	3549.49	5596.1	1.31848	2.7895e-07	2.1551e-06	4.0857	2.0306	up	0
NEG_620	2,3-Dihydroxybenzoic acid	Benzenoids	Benzoic acids and derivatives	189360	218960	181144	238228	183449	267109	54258.3	57587.4	54107.1	52976.9	46528.1	65597	1.3088	1.8873e-06	1.061e-05	3.947	1.9808	up	C00196
NEG_475	Salicylic acid	Benzenoids	Benzoic acids and derivatives	27961.9	23103.6	18609.9	22264.1	21634.8	21759	47407.6	50513.6	48240.4	47866.6	44536	46653.8	1.34322	2.4024e-09	7.192e-08	0.45174	-1.1464	down	C00805
NEG_5518	1-O-Sinapoyl-beta-D-glucose	Cinnamic acids and derivatives	Hydroxycinnamic acids and derivatives	252044	175008	162158	209866	189817	163743	35552.1	36608.8	37246.9	36640.7	33686.6	38291.8	1.32943	2.5785e-08	3.5288e-07	4.9568	2.3094	up	0
NEG_1229	3-Hydroxysuberic acid	Hydroxy acids and derivatives	Medium-chain hydroxy acids and derivatives	77780.9	139710	94568	120256	93184	137866	8674.32	11843.4	9615.19	8618.16	7335.24	8739.51	1.31972	8.6684e-07	5.6492e-06	12.817	3.68	up	0
NEG_10900	3'-Galloylquercitrin	Flavonoids	Flavonoid glycosides	88881.8	102870	76799	87543.5	73254.7	136090	25348.6	14551.6	17067.4	25095.2	23018.3	19445	1.2621	5.6814e-05	0.00017963	4.5924	2.1992	up	0
NEG_195	Catechol	Phenols	Benzenediols	125393	142579	115650	153591	121570	169043	36608.6	37763.6	33156.3	33057.5	30502.4	39423.3	1.31485	1.0206e-06	6.4752e-06	4.0042	2.0015	up	C15571
NEG_3935	Dihydromyricetin	Flavonoids	Flavans	92709.6	77650	77881.7	96481.6	78768.2	86345.5	16458.5	17926	17279.4	15337.1	15032.2	17150.1	1.33644	8.6134e-09	1.684e-07	5.0467	2.3354	up	0
NEG_7127	Flavanomarein	Flavonoids	Flavonoid glycosides	232404	182264	169631	238901	157316	260597	25450.1	25784	22374.9	21208.4	21715.5	26222.6	1.29766	4.5938e-06	2.1363e-05	8.4792	3.0839	up	0
NEG_6686	Flavanone base + 3O, O-Hex	Flavonoids	Flavonoid glycosides	139023	132594	110190	162886	98447.1	181011	35932.8	35517.3	30042	33313.4	30952.7	39004.3	1.25846	4.605e-05	0.00015057	4.0152	2.0055	up	0
NEG_2313	N-Phenylacetylaspartic acid	Carboxylic acids and derivatives	Amino acids, peptides, and analogues	47554.2	71956.1	53181.7	88082.9	54401.6	146156	2219.42	2729.65	2056.94	2063.57	2322.85	2887.3	1.18752	0.00055723	0.0013653	34.772	5.1199	up	0
NEG_2714	Phloretin	Linear 1,3-diarylpropanoids	Chalcones and dihydrochalcones	302685	161240	145821	198808	143368	186163	28711.8	29876.8	27449.7	27510.9	23298.5	30265.4	1.3237	2.1371e-07	1.7061e-06	5.9988	2.5847	up	C00774
NEG_270	Pyrrolidine-2-carboxamide	Carboxylic acids and derivatives	Amino acids, peptides, and analogues	59604.5	73094.9	68717	90321.9	64942.7	115338	7052.65	7887.71	5282.63	6012.11	3996.34	9484.32	1.29002	8.5622e-06	3.4805e-05	12.461	3.6393	up	0
NEG_11429	Quercetin-3,4'-O-di-beta-glucoside	Others		104143	113632	111011	102342	106814	120730	23544.4	28759.2	30148	31004.5	20745.1	31230.8	1.34442	1.6558e-09	5.2876e-08	4.0224	2.0081	up	0
NEG_1887	Resveratrol	Stilbenes		99051.7	91839.3	82969.9	94200.1	86951.8	89768.8	17212.7	18002.7	16234.1	17093.3	12854.3	17598.2	1.34769	3.6734e-11	3.3792e-09	5.403	2.4338	up	C03582
NEG_10467	Rhoifolin	Flavonoids	Flavonoid glycosides	127673	131281	134590	131718	121117	136416	7034.39	6422.57	8060.88	6987.56	6402.39	6317.72	1.35183	1.9715e-12	9.4434e-10	19.069	4.2532	up	0
NEG_10773	Tiliroside	Flavonoids	Flavonoid glycosides	45699.7	97633	101661	97011.6	45477.9	115115	27138.1	11776.9	9520.96	21680.5	9493.28	17703.5	1.24012	9.0637e-05	0.00026635	5.6342	2.4942	up	0
NEG_6749	trans-piceid	Others		96954.8	85250.6	78231.4	90891.6	79628.9	91012.3	19777.5	21384	19625.9	20780.6	17565.3	20297.9	1.3451	8.9847e-10	3.3105e-08	4.2704	2.0944	up	0
NEG_6751	Trilobatin	Others		248574	177786	157071	224407	144819	259729	26785.6	28538.6	23234	23183.5	19996.5	28906.8	1.28381	1.2455e-05	4.8306e-05	7.6775	2.9406	up	0
NEG_7124	Eriodictyol-7-O-glucoside	Flavonoids	Flavonoid glycosides	65032.2	53190.4	48166.6	64553	51662.8	75381.6	8491.87	10427.5	8837.13	8857.41	8813.93	11200.2	1.30873	1.8939e-06	1.061e-05	6.208	2.6341	up	0
NEG_3467	Salicylic acid glucoside	Organooxygen compounds	Carbohydrates and carbohydrate conjugates	83382.2	103035	97310.8	89940.1	102781	92580.2	24637.5	25945	27276.4	27792.9	28672.3	28721.5	1.34592	4.4614e-10	1.7808e-08	3.5743	1.8377	up	0
NEG_13715	Cyanidin 3-(2G-glucosylrutinoside)	Others		73252.8	70977.1	69958.3	75125.6	69465.9	75681.2	18442.5	19033.4	16878.8	19228.1	16589	18657	1.34936	1.2632e-11	1.3447e-09	3.9829	1.9938	up	0
NEG_1532	N-Acetyl-L-phenylalanine	Carboxylic acids and derivatives	Amino acids, peptides, and analogues	58237.8	75835.6	74884.9	99982.4	66356.8	140330	16713.5	15543.2	13877.2	14837.4	12603.3	16727	1.23106	0.00014256	0.00040353	6.0782	2.6036	up	C03519
NEG_11430	Quercetin 3-O-sophoroside	Flavonoids	Flavonoid glycosides	102195	145601	132782	170843	123886	189568	35770.1	37472.8	31707.5	32591.2	32492.7	38947.2	1.30714	2.1505e-06	1.1574e-05	4.3794	2.1307	up	0
NEG_7482	Kaempferol 3-glucuronide	Flavonoids	Flavonoid glycosides	43410	53530.8	51768.5	61010.4	46332.3	63276.9	17999.8	17844	16233	15942.7	14387.1	19325.4	1.32038	3.5472e-07	2.6758e-06	3.2547	1.7025	up	0
NEG_6753	Phlorizin	Flavonoids	Flavonoid glycosides	64741.6	47957.4	43172.7	61131.3	40493	30890.8	18953.1	19736.5	16845	16530.7	16341.8	20258.5	1.19012	0.00024086	0.00064097	2.4697	1.3044	up	C01604
NEG_5603	cis-Piceid	Stilbenes	Stilbene glycosides	48401.4	39640.6	36528.3	44673	37601.5	43028.1	11575.7	12880.2	11165.6	11303.1	9462.06	12215.5	1.33599	1.2753e-08	2.0366e-07	3.5242	1.8173	up	0
NEG_7928	Isorhamnetin-3-O-glucoside	Flavonoids	Flavonoid glycosides	25022.9	24563.7	22806.7	35011.3	21349.1	49342.7	4421.24	4895.6	3195.19	3830.6	3474.17	5378.96	1.2002	0.00035887	0.00091193	7.2904	2.866	up	0
NEG_6682	Avicularin	Flavonoids	Flavonoid glycosides	26079.8	37406.8	38715.2	43560.3	28168.4	73415.3	12967.1	3512.92	12310.7	12468.5	13441.8	12962	1.15157	0.0012869	0.0029424	3.9241	1.9724	up	0
NEG_10119	[2-Hydroxy-3-[3,4,5-trihydroxy-6-(hydroxymethyl)oxan-2-yl]oxypropyl] octadeca-9,12-dienoate	Glycerolipids	Glycosylglycerols	99170.3	2276.37	2602.42	9666.92	2712.04	2615.9	20464.4	20379.1	31075.5	33370.6	39859.4	20831.2	1.19309	0.00020747	0.00056145	0.14368	-2.799	down	0
NEG_14415	[3,4-Dihydroxy-6-[5-hydroxy-2-(4-hydroxyphenyl)-4-oxo-7-[3,4,5-trihydroxy-6-(hydroxymethyl)oxan-2-yl]oxychromen-3-yl]oxy-5-[(2S,3R,4R,5R,6S)-3,4,5-trihydroxy-6-methyloxan-2-yl]oxyoxan-2-yl]methyl acetate	Flavonoids	Flavonoid glycosides	10192	10417.8	10046.4	9928.82	8577.83	19387.6	2627.73	1762.72	1782.44	2241.81	1910.25	2598.1	1.19611	0.00045099	0.0011251	5.419	2.438	up	0
NEG_1060	4-Methoxycinnamic acid	Cinnamic acids and derivatives	Cinnamic acids	13346.6	10002.1	10152.7	11594.7	9189.41	11894.3	3648.79	3480.84	3107.77	2996.03	2006.38	2961.13	1.32288	1.7519e-07	1.4468e-06	3.4833	1.8005	up	0
NEG_11127	5-Hydroxy-2-(3-hydroxy-4-methoxyphenyl)-7-[(2S,3R,4S,5S,6R)-3,4,5-trihydroxy-6-[[(2R,3R,4R,5R,6S)-3,4,5-trihydroxy-6-methyloxan-2-yl]oxymethyl]oxan-2-yl]oxy-2,3-dihydrochromen-4-one	Flavonoids	Flavonoid glycosides	38100.2	19855.2	25801	34194.2	20386.9	43289.7	4141.03	5715	4129.86	2934.07	5989.21	9317.38	1.19884	0.00032779	0.00084643	5.3444	2.418	up	0
NEG_4403	Bavachalcone	Others		22682.5	20895.6	18304.6	25680.5	17039.6	32862.1	4905.45	6557.81	6517.8	4427.33	3350.72	5095.61	1.24314	8.9699e-05	0.00026441	4.4641	2.1584	up	0
NEG_6616	Cosmosiin	Flavonoids	Flavonoid glycosides	27563.8	25586.1	24547.3	25164.3	22258.8	28443	7282.91	6680.41	6632.06	7049.28	6962	6986.29	1.3431	8.2508e-09	1.6467e-07	3.6352	1.862	up	C04608
NEG_7055	Cynaroside	Others		20937.7	25954.6	20369.8	34779.5	35878.5	27617.2	7762.51	17168.5	21059.4	7709.66	5217.17	4356.79	1.12348	0.0014194	0.0031846	2.7423	1.4554	up	0
NEG_6269	Liquiritin	Others		15164	13273.2	10860.2	16348	11510.3	15552.6	4605.82	5372.82	4707.07	5045.53	4211.65	4372.09	1.28459	9.8209e-06	3.9202e-05	2.8625	1.5173	up	0
NEG_7981	Myricetin-3-O-galactoside	Flavonoids	Flavonoid glycosides	12727	18447.3	15696	23391.4	12297.9	26242.6	8513.28	8425.28	6821.63	7705.72	5004.23	11774.5	1.12581	0.0015349	0.0034275	2.3897	1.2568	up	0
NEG_3966	Neobavaisoflavone	Isoflavonoids	Isoflav-2-enes	35229.4	3521.15	2986.91	6349.3	4223	1945.09	17729	15407	20620.2	22117.2	20927.8	13001.5	1.26473	1.6143e-05	6.0766e-05	0.20792	-2.2659	down	0
NEG_2636	Nordazepam	Organoheterocyclic compounds	1,4-benzodiazepines	10433.9	9546.32	8149.81	9346.04	8506.3	9328.57	585.397	469.862	502.98	312.484	217.976	695.585	1.34851	1.0909e-10	6.5319e-09	19.342	4.2736	up	C07486
NEG_13713	Quercetin 3-O-[2''-O-(6'''-O-p-coumaroyl)-b-D-glucopyranosyl]-a-L-rhamnopyranoside	Others		24948.7	21594.5	27709.8	39543.9	26407.3	43327.8	5820.88	5221.5	2881.54	3832.83	3531.19	6462.05	1.24776	5.391e-05	0.00017215	6.8577	2.7777	up	0
NEG_11423	Quercetin 3,4'-diglucoside	Flavonoids	Flavonoid glycosides	32034.5	35142.1	23743.3	31329.5	27810.5	35834.9	3296.17	4356.47	4618.69	4204.42	4003.32	4796.91	1.32524	4.2488e-07	3.1553e-06	7.3047	2.8688	up	0
NEG_11809	Quercetin 5-Glc-Rha	Flavonoids	Flavonoid glycosides	26402.2	20477.3	22108.6	26748.4	14775.4	22483	1689.2	2247.32	1790.43	1803.73	1792.37	2144.07	1.30576	1.509e-06	8.6219e-06	11.155	3.4796	up	C17563
NEG_7537	Spiraeoside	Flavonoids	Flavonoid glycosides	48834.6	34492.7	30139.4	37460.8	26535.7	41888.9	8920.18	10121	8115.4	9873.05	9420.37	10008	1.30352	3.4159e-06	1.6624e-05	3.6243	1.8577	up	0
NEG_12189	Syrosingopine	Alkaloids and derivatives		23162.5	24943.7	22244	28357	21339.7	33984.3	5809.08	5133.62	4469.5	5043.03	5697.14	5915.32	1.30291	3.7447e-06	1.8027e-05	4.8972	2.292	up	0
NEG_588	Vanillin	Phenols	Methoxyphenols	24482.2	20871.4	20153.5	25512.5	20201.3	26129.3	4935.8	4658.09	6118.65	5696.48	4518.51	5900.39	1.32467	2.2118e-07	1.7512e-06	4.2554	2.0893	up	C00755
POS_3124	Hydrocinchonine	Alkaloids and derivatives		118411	92501	104246	96899.2	93586.1	108332	2.07893e+06	2.12993e+06	1.94985e+06	1.81572e+06	1.70929e+06	2.1032e+06	1.34775	1.7605e-09	5.4404e-08	0.050452	-4.3089	down	0
POS_6265	(5-Benzoyloxy-4,6-dihydroxy-3-methoxycyclohexen-1-yl)methyl benzoate	Benzenoids	Benzoic acids and derivatives	75936.9	63597.4	58981.3	78425.6	61152.6	84410.8	22208.3	24542.1	19367.5	18519.4	18161.4	22167	1.30098	2.9085e-06	1.498e-05	3.328	1.7346	up	0
POS_7113	[1-[2-Aminoethoxy(hydroxy)phosphoryl]oxy-3-hydroxypropan-2-yl] octadeca-6,9,12-trienoate	Glycerophospholipids	Glycerophosphoethanolamines	115526	102208	105276	118404	101342	117013	37288.2	38119.1	33780.6	31171.2	30437.8	40034.6	1.33509	1.1013e-08	1.9461e-07	3.0977	1.6312	up	0
POS_7078	[5-Ethenyl-3-hydroxy-4-(3-hydroxyprop-1-en-2-yl)-2-(3-methoxy-3-oxoprop-1-en-2-yl)-5-methylcyclohexyl] 4-acetyloxy-3-hydroxy-2-methylidenebutanoate	Prenol lipids	Sesquiterpenoids	90758.9	87448.5	84496	95453.7	75975.9	101861	30926.2	31776.9	27569.7	27274.3	25827.8	31644	1.3261	1.7479e-07	1.4468e-06	3.0527	1.6101	up	0
POS_641	2-Hydroxyquinoline	Organoheterocyclic compounds	Quinolones and derivatives	243742	154706	138351	276894	155349	316144	34898.1	35638.8	28532.1	24957.5	27664.5	38028.8	1.18523	0.00047932	0.0011896	6.5873	2.7197	up	0
POS_1576	2,3-Dihydro-3-hydroxy-2-oxo-1H-indole-3-acetic acid	Organoheterocyclic compounds	Indolyl carboxylic acids and derivatives	230130	114139	100035	254695	108582	270999	29838.7	31022.1	23943	16091	20196.6	35135.3	1.10216	0.0024871	0.0052153	6.5171	2.7042	up	0
POS_4537	5,7,3'-Trihydroxy-6,4',5'-trimethoxyflavone	Others		171522	141951	142534	173280	140930	187247	6239.91	6384.83	5433.32	5309.9	4778.12	5587.68	1.33579	3.1858e-08	3.9548e-07	27.958	4.8052	up	0
POS_2704	alpha-Naphthoflavone	Flavonoids	Flavones	4279.95	97564	107542	5368.95	10725.8	3727.87	169728	171461	173118	181380	154048	185416	1.20676	0.00024772	0.00065739	0.26075	-1.9393	down	0
POS_2216	D-Pantothenic acid	Carboxylic acids and derivatives	Amino acids, peptides, and analogues	1.16397e+06	947659	885958	1.15708e+06	733309	1.15413e+06	475744	434858	227283	198895	109415	505580	1.20847	0.00016239	0.00045093	2.9992	1.5846	up	0
POS_1458	Methylecgonine	Alkaloids and derivatives		92430.5	77795	60408	99515	76250.5	99707.4	21854.6	19404.3	19147.3	21174.3	19950.9	21307.3	1.28953	7.574e-06	3.1685e-05	4.0412	2.0148	up	0
POS_6965	Phenethyl sophoroside	Organooxygen compounds	Carbohydrates and carbohydrate conjugates	114309	104977	96927.6	106170	96364.1	107187	15790.5	17306	13301.3	14484.3	13718.8	19432.7	1.34882	4.2329e-11	3.3792e-09	6.5291	2.7069	up	0
POS_9809	Toosendanin	Others		186557	168679	157057	190137	167521	204373	36103.4	39766.8	36809.4	33012.5	31733.6	40613.1	1.33624	2.4944e-08	3.5288e-07	4.8859	2.2886	up	0
POS_6623	4'-O-b-D-Glucosyl-5-O-methylvisamminol	Organoheterocyclic compounds	1-benzopyrans	61835.8	53864.9	53010.8	59875.5	55098.1	66510.9	8238.53	8218.37	8511.67	7781.82	6965.61	9585.4	1.342	4.74e-09	1.0812e-07	7.0187	2.8112	up	0
POS_5055	6-{5a,11-dimethyl-1H,2H,3H,4H,5H,6H,7H,8H,9H,9aH-cyclopenta[a]phenanthren-1-yl}-2,3-dimethylheptane	Others		105800	65929.7	77719.3	45198.6	85135.2	32089.4	238812	212775	233268	238675	221708	207814	1.32949	1.0119e-07	9.5037e-07	0.27145	-1.8812	down	0
POS_6081	Majdine	Organoheterocyclic compounds		6969.17	7813.52	8212.87	5604.31	7470.85	6403.86	16802.9	19208.3	17317	15296.6	14121.3	20003.1	1.2968	7.7505e-06	3.2283e-05	0.41466	-1.27	down	0
POS_2926	2,3-Dihydroxypropyl tetradecanoate	Glycerolipids	Monoradylglycerols	14977.8	16531.8	14477.7	11831.5	21394.1	6678.14	56469.7	77123.1	53247.9	26407	45350	35140.5	1.10598	0.0023819	0.0050348	0.2897	-1.7874	down	0
POS_5026	3-[2-Methoxy-3-[(2S,3R,4S,5S,6R)-3,4,5-trihydroxy-6-(hydroxymethyl)oxan-2-yl]oxyphenyl]propanoic acid	Organooxygen compounds	Carbohydrates and carbohydrate conjugates	28390.2	20477	27383.7	30679.4	25904	35829.7	4034.17	4414.89	3277.98	3238.34	3224.77	4280.27	1.30152	2.3679e-06	1.2533e-05	7.4911	2.9052	up	0
POS_5374	3,5,5-Trimethyl-4-[3-[(beta-D-glucopyranosyl)oxy]butyl]-3-cyclohexen-1-ol	Fatty Acyls	Fatty acyl glycosides	23367.6	17921.7	19626.1	16335.4	15380.1	26050.9	7234.1	5573.93	4913.23	6280.05	3858.03	8717.02	1.24573	6.9575e-05	0.00021369	3.1271	1.6448	up	0
POS_5322	Diflufenican	Benzenoids	Anilides	29811.9	32160.7	30166.6	28187.1	21773.1	27439.6	5418.85	6071.65	5462.49	4908.55	5121.65	5194.29	1.32646	1.7944e-07	1.4693e-06	5.2109	2.3815	up	0
POS_8334	Hypocrellin B	Others		17990	17806.9	18041.8	13429.8	20136.8	19843.2	7907.04	8802.84	8896.86	8979.42	8359.38	9478.44	1.27527	1.7979e-05	6.6759e-05	2.0432	1.0308	up	0
POS_7964	Lyalosidic acid	Prenol lipids	Terpene glycosides	35326.2	29235.1	27699.5	35527.1	27916.3	37776.6	11203.1	10538.5	9206.93	22116.2	6978.76	29461.9	1.04745	0.0043503	0.0086344	2.1204	1.0843	up	0
POS_4026	Papaverine	Organoheterocyclic compounds	Benzylisoquinolines	4366.96	4151.16	3503.47	4008.62	2493.15	4126.93	34731	38310.5	29474.7	28984.8	25698.2	40284.1	1.31759	1.402e-06	8.2907e-06	0.1111	-3.1701	down	0
POS_12025	Ritonavir	Carboxylic acids and derivatives	Amino acids, peptides, and analogues	48991.8	38230.7	37153.2	46232.3	32205.4	39645.7	33779.5	5535.03	22698.1	4914.33	5712.8	5892.67	1.11181	0.0018677	0.0040664	2.9562	1.5638	up	C07240
POS_4076	Sulpiride	Benzenoids	Benzenesulfonamides	2196.97	2521.25	1903.38	2377.87	1217.69	2302.74	16994.6	16821.5	13079.5	11712.3	12945.5	15857.6	1.31902	7.8111e-07	5.2329e-06	0.14172	-2.8189	down	0
NEG_14002	Quercetin 3-rutinoside 7-galactoside	Flavonoids	Flavonoid glycosides	147604	225200	209481	257696	198817	310550	55460.1	55231.1	50434.9	48282.3	51495.9	55706	1.30561	2.8609e-06	1.4895e-05	4.5548	2.1874	up	0
NEG_770	Umbelliferone	Coumarins and derivatives	Hydroxycoumarins	47674.9	47478.2	44631.9	46771.1	40073.8	48585.2	15721.2	14879.2	13721.5	16759.6	13618.8	17944.9	1.33777	1.2756e-08	2.0366e-07	2.9472	1.5594	up	C09315
NEG_7422	Parishin E	Others		276050	405419	414173	537777	328087	618798	79432.9	84716	71558.7	69445	61900.1	91454.9	1.27539	1.8682e-05	6.9103e-05	6.0307	2.5923	up	0
NEG_4870	3-(2-Glucosyloxy-4-methoxyphenyl)propanoic acid	Organooxygen compounds	Carbohydrates and carbohydrate conjugates	92331.5	104988	72996.1	87825	71050.5	84902	32921.5	36406.4	36906.5	32227.2	29160.4	32828.7	1.28974	8.4889e-06	3.4754e-05	2.5249	1.3362	up	0
NEG_3233	Cianidanol	Flavonoids	Flavans	163590	133491	126546	163429	130449	134490	24768.1	26154.1	23485.3	24049.6	22129	27133.4	1.3332	1.5332e-08	2.3691e-07	5.5923	2.4834	up	C06562
NEG_4388	Coumaroyl quinic acid	Organooxygen compounds	Alcohols and polyols	1.91215e+06	1.66368e+06	1.53777e+06	2.11721e+06	1.45045e+06	2.87257e+06	81735.8	91592.9	78127.1	72239.7	67285.4	89469.7	1.27195	2.7118e-05	9.4814e-05	24.082	4.5899	up	0
NEG_1262	Quinic acid	Organooxygen compounds	Alcohols and polyols	333788	289299	269586	374375	255057	505656	18271.4	20370.8	16457.5	16150.4	15893.1	19969.3	1.26835	3.2106e-05	0.00010868	18.978	4.2462	up	C00296
NEG_3581	Sulfo jasmonate	Fatty Acyls	Lineolic acids and derivatives	82844.7	219298	151782	211650	145178	288045	14224.4	15099.3	13314	12742.3	11987.1	16575.8	1.27967	2.1027e-05	7.5727e-05	14.524	3.8603	up	0
NEG_3039	Xanthosine	Nucleosides, nucleotides, and analogues		44495.8	61885.7	53728.6	72518.1	53976	81140.2	30007.3	33072.7	27995.8	25553.1	22057.1	33435.8	1.24212	7.3019e-05	0.00022276	2.2536	1.1722	up	C01762
NEG_11728	[6-(Furan-3-yl)-6,8,12,16,21-pentahydroxy-7,15-dimethyl-9-oxo-3,17,19-trioxaheptacyclo[9.9.3.01,10.02,4.02,7.011,18.015,23]tricosan-14-yl] 2-methylbutanoate	Prenol lipids	Triterpenoids	42338.4	11494.7	10472.7	13145.9	10537.9	9219.23	452.48	206.448	430.894	236.741	256.517	627.068	1.33015	2.4423e-08	3.5288e-07	29.792	4.8968	up	0
NEG_4107	3-Hydroxy-N-(2-oxooxolan-3-yl)tetradecanamide	Carboxylic acids and derivatives	Amino acids, peptides, and analogues	40368.8	44753.4	37609.5	43654	38061.8	48956.3	11984	12850.1	12590.1	12940.1	12377	14237.5	1.33303	1.0252e-07	9.5353e-07	3.3209	1.7316	up	0
NEG_4646	3'-Adenylic acid	Nucleosides, nucleotides, and analogues		9910.91	9856.18	10216.3	12094	10000.9	13584.4	3266.18	3174.26	3176.45	3139.61	2753.87	3112.24	1.31638	7.1437e-07	4.8883e-06	3.5925	1.845	up	C01367
NEG_518	4-Hydroxyquinoline	Organoheterocyclic compounds	Quinolones and derivatives	25466.2	25702.1	24733.3	30079.5	24055.1	30193.4	7517.97	7259.19	6525.07	7172.88	6009.72	7630.03	1.33095	5.7501e-08	6.1806e-07	3.8399	1.9411	up	0
NEG_2369	9-Hexadecenoic acid	Fatty Acyls	Fatty acids and conjugates	105560	9455.99	8920.04	24159.4	8157.94	8695.2	19020.5	21694	31668.9	29739.8	35034.7	21089.9	1.02124	0.0061471	0.011731	0.45035	-1.1509	down	0
NEG_4174	Adenosine 2',3'-cyclic phosphate	Nucleosides, nucleotides, and analogues	Cyclic purine nucleotides	13242.3	9848.24	9160.87	15093.2	9533.07	16037.7	2770.61	2371.4	1895.67	1800.54	1645.48	2660.7	1.25031	5.4435e-05	0.00017325	5.4478	2.4457	up	0
NEG_14001	Flavonol base + 4O, O-Hex-Hex, O-dHex	Flavonoids	Flavonoid glycosides	20854.2	19259.3	18123.3	16605.1	13802.4	19786.6	4698.42	5121.15	5637.42	4327.6	3827.53	4671.49	1.32244	4.9092e-07	3.5901e-06	3.7157	1.8936	up	0
NEG_1257	Hydron;2-hydroxypropane-1,2,3-tricarboxylate	Carboxylic acids and derivatives	Tricarboxylic acids and derivatives	8633.64	30434	33488.2	24810.7	24759.4	34684	12663.3	13075.5	14897.2	14880.9	15774.5	14621.3	1.27512	2.7684e-05	9.644e-05	2.0697	1.0494	up	0
NEG_1221	Kynurenic acid	Organoheterocyclic compounds	Quinoline carboxylic acids	10689.7	10829.4	10697.2	11943.7	10319.3	12362.3	3153.94	3181.58	2539.56	2409.88	2882.4	2976.64	1.34182	4.0041e-09	9.8356e-08	3.9304	1.9747	up	C01717
NEG_11393	Narcissin	Flavonoids	Flavonoid glycosides	31641.7	29895.8	27989.9	32390.4	24321.2	35589.9	10634.4	10240.1	10628.9	10689.7	9644.39	10813.2	1.31311	1.3114e-06	7.9016e-06	2.8767	1.5244	up	0
NEG_5790	Propoxycarbazone	Benzenoids	Benzoic acids and derivatives	32385.3	27480.2	34758.3	28867.2	31806.5	28874.9	4109.09	4228.74	3367.99	3331.23	3029.1	4065.9	1.33612	3.6188e-09	9.3697e-08	8.2299	3.0409	up	0
NEG_996	trans-Aconitic acid	Carboxylic acids and derivatives	Tricarboxylic acids and derivatives	18982.5	28074.5	28725	35559.7	21635.9	37071.6	7531.43	8331.31	7704.29	6392.37	5971.98	7639.67	1.28685	8.6104e-06	3.4805e-05	4.1606	2.0568	up	C02341
NEG_11401	Verbascoside	Others		45686.8	49060.5	45711.6	42905.1	51288.5	42601.1	22635.9	21882.5	22291.8	20330.1	22752.9	22277.7	1.32654	9.5983e-08	9.1041e-07	2.1024	1.0721	up	0
POS_4619	Sucrose	Organooxygen compounds	Carbohydrates and carbohydrate conjugates	191950	185642	208960	237251	176253	179295	125910	111367	88872	90374.6	49759.4	118393	1.19378	0.00016691	0.00046081	2.0266	1.019	up	C00089
POS_5391	6-{9a,11a-dimethyl-1H,2H,3H,3aH,3bH,4H,8H,9H,9bH,10H,11H-cyclopenta[a]phenanthren-1-yl}-3-ethyl-2-methylheptane	Others		1.22504e+06	374798	380257	247256	575772	208126	747497	671497	777335	687107	680709	735530	1.21382	0.00023891	0.00063754	0.49851	-1.0043	down	0
POS_5685	Phenyl 6-O-[(2R,3R,4R)-3,4-dihydroxy-4-(hydroxymethyl)tetrahydro-2-furanyl]-beta-D-glucopyranoside	Organooxygen compounds	Carbohydrates and carbohydrate conjugates	38691	41962.9	37514.8	46597.4	45384.3	45571	22014.2	23830.9	20323.7	18444.3	15309.2	24912.1	1.29001	2.8858e-06	1.4944e-05	2.0863	1.0609	up	0
NEG_4756	6:3+6O Fatty acyl hexoside	Fatty Acyls	Fatty acyl glycosides	66299.6	100730	66264.9	62898.5	55127.8	60563.3	154409	130076	124413	196824	124923	106640	1.10875	0.0018481	0.0040329	0.49529	-1.0136	down	0
NEG_7542	Hyperoside	Flavonoids	Flavonoid glycosides	53044.5	111066	103007	138267	99839	52451	44295.2	68185	41062.1	43190.5	41850.8	49988.7	1.05493	0.0033452	0.0067609	2.0985	1.0693	up	C10073
NEG_8059	Apigenin-6-C-arabinoside-8-C-glucoside	Lignans, neolignans and related compounds		115897	76200.1	62882	77686	112379	88510.2	41051.5	52897.6	34607.3	31748.6	33730.9	37615.9	1.17939	0.00040703	0.0010289	2.1635	1.1134	up	0
NEG_11221	3-{(E)-2-[4-(beta-D-Glucopyranosyloxy)-2-hydroxyphenyl]vinyl}-5-hydroxyphenyl beta-D-glucopyranoside	Stilbenes	Stilbene glycosides	254751	157060	132342	162204	126711	108320	32515.7	46245.1	42171.3	7860.36	17251.2	22849.7	1.28709	4.4824e-06	2.0947e-05	4.8786	2.2865	up	0
NEG_7056	Astragalin	Flavonoids	Flavonoid glycosides	207051	257507	244856	121412	231730	324248	15986.4	23368.7	16983.5	15515.1	14736.6	15979.3	1.26549	4.1468e-05	0.00013746	13.802	3.7868	up	C12249
NEG_2676	Naringenin	Flavonoids	Flavans	188904	133769	130639	138196	155821	110156	12440.7	8077.46	8606.97	11376.9	150369	9253.37	1.07686	0.0045076	0.0089037	4.009	2.0032	up	C00509
NEG_522	(S)-3-Amino-5-methyl-hexanoic acid	Carboxylic acids and derivatives	Amino acids, peptides, and analogues	5435.54	5235.24	4827.59	5134.43	5402.46	5265.49	15508.8	15224.5	14995.9	14226	16261.9	15471.2	1.34501	1.357e-10	6.8968e-09	0.33852	-1.5627	down	0
NEG_418	2-Hydroxy-4-methylvaleric acid	Fatty Acyls	Fatty acids and conjugates	37194.1	37798.9	37919.1	50452.7	33569.1	51029	19518	21328.7	17573.2	16202.1	13176.4	23670	1.22261	0.00011884	0.00034397	2.269	1.1821	up	0
NEG_341	4-Hydroxybenzaldehyde	Organooxygen compounds	Carbonyl compounds	41732.8	43423.5	40768.8	55377	39459.7	71684.4	23844.6	23110.9	17727.8	22723.8	18885.4	25082.5	1.16809	0.00073177	0.0017396	2.2901	1.1954	up	C00633
NEG_2639	Galangin	Flavonoids	Flavones	41262.5	8111.73	7993.21	11382.6	7025.89	5528.75	3991.14	3473.6	4169.18	3591.74	3468.44	3754	1.13724	0.00089622	0.0020992	2.1405	1.098	up	C10044
NEG_8969	Isochlorogenic acid B	Others		82551.9	95886.9	93255.9	104267	85188.6	134948	35758.9	37159.2	32559	30598.3	28381	37382.2	1.28519	1.1451e-05	4.4961e-05	3.0532	1.6103	up	0
POS_615	Tropine	Alkaloids and derivatives		737078	641866	392005	720991	574285	721189	102415	109009	117425	124003	103832	105694	1.29041	8.1756e-06	3.376e-05	5.5262	2.4663	up	C06173
POS_8072	(2-Hydroxy-3-octadeca-6,9,12-trienoyloxypropyl) 2-(trimethylazaniumyl)ethyl phosphate	Glycerophospholipids	Glycerophosphocholines	2.82272e+06	2.76035e+06	3.01024e+06	2.58922e+06	2.48168e+06	2.7595e+06	5.67656e+06	6.07683e+06	5.27151e+06	6.02194e+06	4.75582e+06	7.33909e+06	1.27619	2.8512e-05	9.8608e-05	0.46444	-1.1064	down	0
POS_2910	[3-[(1Z,9Z)-Octadeca-1,9-dienoxy]-2-octadecanoyloxypropyl] 2-(trimethylazaniumyl)ethyl phosphate	Glycerophospholipids	Glycerophosphocholines	808159	834755	848393	732113	809003	687139	2.35124e+06	2.38278e+06	2.19773e+06	2.00618e+06	1.86539e+06	2.64741e+06	1.31878	1.3564e-06	8.1212e-06	0.34895	-1.5189	down	0
POS_1295	Deethylatrazine	Organoheterocyclic compounds	Aminotriazines	390866	338849	325907	394648	322139	396716	130856	136205	114095	106725	91363.9	145996	1.31749	3.0701e-07	2.3342e-06	2.9423	1.557	up	C06559
POS_3252	Fenpropimorph	Benzenoids	Phenylpropanes	243869	235814	250103	203743	234539	266120	1.29193e+06	1.38171e+06	1.33475e+06	1.36927e+06	1.10696e+06	1.54954e+06	1.33863	4.175e-08	4.7615e-07	0.17779	-2.4918	down	0
POS_2430	Palmitic amide	Others		777391	919956	899444	902555	743923	756461	2.61027e+06	2.13475e+06	2.1903e+06	1.91056e+06	1.64685e+06	1.89865e+06	1.27471	2.2549e-05	8.0908e-05	0.4089	-1.2902	down	0
POS_8297	Maltotriose	Organooxygen compounds	Carbohydrates and carbohydrate conjugates	359738	333799	206636	442803	339700	522422	907284	1.10557e+06	1.07028e+06	1.21004e+06	1.23042e+06	1.02416e+06	1.28442	3.8022e-06	1.8194e-05	0.3382	-1.5641	down	0
NEG_7059	Cyanidin 3-O-glucoside	Flavonoids	Flavonoid glycosides	430498	372975	346400	448325	312989	485671	119376	130900	114521	111073	100672	125772	1.29312	5.9879e-06	2.6194e-05	3.3598	1.7484	up	0
NEG_824	Phenylalanine	Carboxylic acids and derivatives	Amino acids, peptides, and analogues	2.71006e+06	2.37717e+06	2.21139e+06	2.78211e+06	2.21685e+06	2.83737e+06	1.10571e+06	1.14167e+06	1.03963e+06	1.03458e+06	946397	1.14295e+06	1.30705	1.4962e-06	8.6219e-06	2.3257	1.2177	up	C00079
NEG_3765	9-Hydroperoxyoctadeca-10,12-dienoic acid	Fatty Acyls	Lineolic acids and derivatives	641932	389192	378579	452054	354974	439007	1.08047e+06	1.15197e+06	1.0269e+06	1.07141e+06	1.00047e+06	1.16909e+06	1.34269	1.0008e-08	1.8304e-07	0.37176	-1.4275	down	0
NEG_3317	Glutamylphenylalanine	Carboxylic acids and derivatives	Amino acids, peptides, and analogues	573597	593420	537019	953876	520603	800145	282161	247990	217842	238278	185679	288020	1.18916	0.00033725	0.00086617	2.7987	1.4848	up	0
NEG_315	Succinic acid	Carboxylic acids and derivatives	Dicarboxylic acids and derivatives	1.58156e+06	1.46184e+06	1.03975e+06	1.07986e+06	937857	796845	406272	425473	432397	523503	426768	346086	1.21926	0.00016829	0.00046196	2.4915	1.317	up	0
POS_6346	1-Dodecanoyl-sn-glycero-3-phosphocholine	Glycerophospholipids	Glycerophosphocholines	15788.9	15573.6	15024.5	15499.5	15058.9	17791	310513	326985	293043	270417	267245	331293	1.34649	2.8771e-09	7.8749e-08	0.052646	-4.2475	down	0
POS_3418	2,4-Dihydroxyheptadecyl acetate	Fatty Acyls	Fatty alcohols	174139	133534	134638	151399	132760	161862	401546	461364	339353	349023	307238	489735	1.27139	3.6883e-05	0.00012311	0.36496	-1.4542	down	0
POS_3037	Norcimifugin	Others		152205	146650	139619	154720	134656	160670	7264.94	7992.97	6932.61	5894.44	6470.71	8228.53	1.34915	1.2246e-10	6.8968e-09	20.652	4.3682	up	0
POS_1333	3-n-Butylphathlide	Others		10514.4	10948.6	8586.61	11820.2	6372.57	11543.7	54902	57812.1	49753.5	47341.9	44820.8	59407.5	1.33339	1.1133e-07	1.0062e-06	0.18828	-2.4091	down	0
POS_4982	(E)-1,4-Bis(4-hydroxy-3-methoxyphenyl)-2,3-dimethylbut-2-ene-1,4-dione	Others		3341.17	3258.3	3061.77	2255.88	2950.2	2642.88	31152.7	28343	33789.5	36991.4	34489.2	27880.2	1.32845	2.4543e-08	3.5288e-07	0.088259	-3.5021	down	0
POS_6966	[8-[2-(3-Methylbutanoyloxy)propan-2-yl]-2-oxo-8,9-dihydrofuro[2,3-h]chromen-9-yl] 3-methylbutanoate	Coumarins and derivatives	Furanocoumarins	5811.52	8979.05	4998.78	5976.71	5956.51	5155.98	33644.3	34700.2	34993.8	35354.4	35238.1	32589.1	1.34506	6.8641e-11	4.697e-09	0.18052	-2.4698	down	0
POS_9072	2-[4-[4-[Hydroxy-(4-hydroxy-3-methoxyphenyl)methyl]-3-(hydroxymethyl)oxolan-2-yl]-2-methoxyphenoxy]-6-(hydroxymethyl)oxane-3,4,5-triol	Lignans, neolignans and related compounds		6435.63	7870.13	7526.96	7078.98	7819.84	7219.04	29286.3	30760.4	25972.1	27993	24346.2	30423.9	1.34189	2.5462e-08	3.5288e-07	0.26672	-1.9066	down	0
POS_5684	3-O-Methylfunicone	Organooxygen compounds	Carbonyl compounds	7891.23	7646	8985.62	9486.54	8442.91	9338.66	43209.1	46259.2	40658.5	45017.9	44053.7	46168.3	1.35029	5.6291e-11	4.1482e-09	0.19852	-2.3327	down	0
POS_6732	5-Hydroxy-7-[4-hydroxy-2-methoxy-3-(3-methylbut-2-enyl)phenyl]-2,2-dimethyl-7,8-dihydropyrano[3,2-g]chromen-6-one	Isoflavonoids	Isoflavans	2122.49	2141.48	2405.91	2296.52	1459.78	2544.5	5392	6248.53	4979.15	5808.17	5065.22	6976.11	1.2954	6.7944e-06	2.8801e-05	0.37767	-1.4048	down	0
POS_10854	9-Methoxy-7-[4-[3,4,5-trihydroxy-6-[[3,4,5-trihydroxy-6-(hydroxymethyl)oxan-2-yl]oxymethyl]oxan-2-yl]oxyphenyl]-[1,3]dioxolo[4,5-g]chromen-8-one	Isoflavonoids	Isoflavonoid O-glycosides	2766.72	2743.78	2693.28	2570.67	2473.46	2974.67	460.662	365.088	347.95	393.586	289.447	387.814	1.34803	3.7969e-10	1.5815e-08	7.1939	2.8468	up	0
POS_8494	Methyl 2-[(1R,5R,6R,13S,14S,16S)-14-acetyloxy-6-(furan-3-yl)-1,5,15,15-tetramethyl-8,17-dioxo-7-oxatetracyclo[11.3.1.02,11.05,10]heptadec-10-en-16-yl]acetate	Prenol lipids	Triterpenoids	2263.28	1206.97	1248.91	2022	1317.55	2239.67	934.558	770.008	946.254	1099.89	403.419	452.577	1.04115	0.0059031	0.01131	2.0931	1.0656	up	0
NEG_3261	8-(2-Oxo-5-pent-2-enylcyclopent-3-en-1-yl)octanoic acid	Fatty Acyls	Eicosanoids	58399.7	35583.7	34226.5	38551.1	33924.3	31676.4	116617	102976	118916	120886	120203	102146	1.33255	1.1666e-08	1.9607e-07	0.30621	-1.7074	down	0
NEG_3142	Salicin	Organooxygen compounds	Carbohydrates and carbohydrate conjugates	465.824	409.087	644.619	497.992	461.572	1194.28	110871	110844	99186.2	96830.7	88176.3	114002	1.34693	3.3616e-09	8.9455e-08	0.0062091	-7.3314	down	C01451
NEG_1009	Arginine	Carboxylic acids and derivatives	Amino acids, peptides, and analogues	104148	103253	162207	108713	149403	122355	5692.68	8631.89	9970.47	8868.97	13788.1	9327.14	1.30473	1.119e-06	7.0066e-06	13.773	3.7837	up	C00062
NEG_4237	(Z)-5,8,11-Trihydroxyoctadec-9-enoic acid	Fatty Acyls	Fatty acids and conjugates	94266.7	78373.4	71168.5	97075.9	67786	99608.5	214453	212880	196985	180923	156030	209859	1.29759	5.9565e-06	2.6176e-05	0.42422	-1.2371	down	0
NEG_444	Adenine	Organoheterocyclic compounds	Purines and purine derivatives	53852.8	41115.6	35073.8	43904.5	38691.1	41077.6	99810	103504	93469.2	96941.9	85682.4	102999	1.33965	3.4116e-08	4.035e-07	0.4118	-1.28	down	C00147
NEG_2605	Adenosine	Nucleosides, nucleotides, and analogues		42626.4	32391.5	29353.5	37993.6	32685.9	36267.6	87644.4	87830	83835.1	84160	77421.8	89865.2	1.34448	5.5121e-09	1.228e-07	0.39633	-1.3352	down	C00212
NEG_1080	Caffeic acid	Cinnamic acids and derivatives	Hydroxycinnamic acids and derivatives	50946.7	46400.9	47705.2	52984.8	37076.9	58267.8	21323.4	21461.5	21094.4	20406.7	16468.4	22903.7	1.27528	1.6018e-05	6.0653e-05	2.3526	1.2343	up	C01481
NEG_457	Threonic acid	Organooxygen compounds	Carbohydrates and carbohydrate conjugates	49037.9	64222.2	64757.8	51648.1	65056.2	61024.4	26552.8	27248.9	28752.7	30437	36291.5	29190.2	1.31607	1.1992e-06	7.3643e-06	2.0622	1.0442	up	C01620
NEG_5401	1-Myristoyl-sn-glycerol 3-phosphate	Glycerophospholipids	Glycerophosphates	34604.5	7480.34	4665.19	11375.2	9303.39	10292.2	41506.3	35764.8	44797.7	45927.7	53421.4	33771	1.28173	3.8174e-06	1.8194e-05	0.20275	-2.3022	down	0
NEG_5592	Alfuzosin	Organoheterocyclic compounds	Benzodiazines	1732.79	1780.52	1285.91	2007.41	1419.02	2285.15	235.992	48.0064	163.34	277.046	75.6323	138.592	1.29579	6.2373e-06	2.7038e-05	11.223	3.4883	up	0
NEG_2637	Genistein	Isoflavonoids	Isoflav-2-enes	8178.6	7899.19	6848.62	9273.67	6871.43	8612.39	1463.19	2148.08	1524.41	2081.42	949.622	2275.83	1.31396	5.1056e-07	3.6776e-06	4.5397	2.1826	up	C06563
NEG_575	p-Coumaryl alcohol	Cinnamic acids and derivatives		10972.5	9705.45	8630.04	7536.32	8081.51	7921.63	25837.1	26544.5	21891	24353.8	19591.6	26350.6	1.32274	7.7287e-07	5.2329e-06	0.34759	-1.5246	down	0
POS_3309	(6E)-Heptadeca-6,16-diene-1,2,4-triol	Fatty Acyls	Fatty alcohols	51771.7	19688.1	33113	36254.7	25428.8	31582.4	168761	183405	156648	148319	145672	183535	1.33969	4.2251e-08	4.7619e-07	0.17771	-2.4924	down	0
POS_6661	[3-Hydroxy-1-(4-methoxy-7-oxofuro[3,2-g]chromen-9-yl)oxy-3-methylbutan-2-yl] (E)-2-methylbut-2-enoate	Coumarins and derivatives	Furanocoumarins	34839.6	33823.5	27017.2	44430.6	27267.8	44055.6	126618	136021	127732	143753	89717.4	125496	1.30197	4.0071e-06	1.891e-05	0.2828	-1.8221	down	0
POS_5804	2,3-dimethyl-5-(3,7,11,15-tetramethylhexadec-2-en-1-yl)cyclohexa-2,5-diene-1,4-dione	Others		48598.4	32114.1	56866.4	37341.7	62290	22276.7	197426	207473	197755	183545	171049	214526	1.33868	8.4871e-08	8.2965e-07	0.21597	-2.2111	down	0
POS_3746	8-(3-Methoxy-2-(methoxycarbonyl)phenyl)octanoic acid	Benzenoids	Benzoic acids and derivatives	19304.4	16008	16357.8	20639.1	11564.2	22386	69377.9	73843	61218.8	59933.5	51025.2	77457.5	1.30717	3.3567e-06	1.6576e-05	0.26561	-1.9126	down	0
POS_3047	8-[3-Oxo-2-[(E)-pent-2-enyl]cyclopenten-1-yl]octanoic acid	Fatty Acyls	Fatty acids and conjugates	75480	37049.8	55363.9	46010.3	25961.2	39081.9	223388	207683	192374	171387	129018	203250	1.30083	6.424e-06	2.7722e-05	0.21663	-2.2067	down	0
POS_3101	Acetylsulfamethoxazole	Benzenoids	Benzenesulfonamides	88114.7	86970.2	101576	100575	90768.4	89289.6	295241	313326	302363	237817	288768	271044	1.32841	9.5404e-08	9.1041e-07	0.32953	-1.6015	down	0
POS_6917	Cephaeline	Alkaloids and derivatives		25034.4	19503.1	17291.6	14416.7	25121.7	17015.5	58601.4	61899.1	68452.8	46096.6	74349.2	68695.7	1.28204	6.7286e-06	2.8649e-05	0.29627	-1.755	down	0
POS_2304	Desacetoxymatricarin	Organoheterocyclic compounds	Gamma butyrolactones	3260.97	1899.42	3559.43	1514.63	1319.6	3240.9	56216.6	62032.4	51256	56745.8	52311.2	62726.4	1.34776	1.304e-09	4.3077e-08	0.040555	-4.624	down	0
POS_5796	Diosgenin	Prenol lipids	Triterpenoids	32639.9	35110.8	31473	24305.2	31984.2	26877.6	112874	105372	46764.1	90318	77098	115054	1.18569	0.00060975	0.0014826	0.32823	-1.6072	down	C08898
POS_11102	Enniatin B1	Peptidomimetics	Depsipeptides	1425.63	359.774	1959.33	3371.37	3190.98	5115.01	64273.8	72001.3	57610.9	55887.9	55966.7	70946	1.33992	2.8817e-08	3.7261e-07	0.044588	-4.4872	down	0
POS_2744	Nandrolone	Steroids and steroid derivatives	Estrane steroids	20887.2	17761.1	19201.5	19907.7	18804.3	21808.3	147220	156463	133949	125960	115036	155035	1.33715	7.3061e-08	7.3506e-07	0.14032	-2.8332	down	C07254
POS_11501	Solanidine base + O-Hex-dHex	Steroids and steroid derivatives	Steroidal glycosides	22635.1	33026.8	27781.6	32063.2	20138.6	29585.3	360091	347989	349122	245401	490376	285314	1.2621	1.4645e-05	5.5897e-05	0.082334	-3.6024	down	0
POS_4250	Vinpocetine	Alkaloids and derivatives		13319.9	10618.8	16079.2	14853.4	10268.1	18074	88137	86629.7	73876.4	77492.1	70242.6	91222.5	1.33807	5.1463e-08	5.6024e-07	0.17201	-2.5394	down	0
POS_6669	Amethopterin	Organoheterocyclic compounds	Pterins and derivatives	9690.19	5215.9	5161.67	7414.86	2890.97	9937.13	51823.6	54921.4	51146.2	51054	47852.7	52796.3	1.34752	2.306e-10	1.052e-08	0.11869	-3.0748	down	C00855
POS_11705	beta-Solanine	Steroids and steroid derivatives	Steroidal glycosides	17476.8	16052.8	12822.9	21157.4	17429.9	22598.7	84588.2	82026.5	34357.3	54542.6	63370.2	44653.4	1.1382	0.0012528	0.002878	0.29728	-1.7501	down	0
POS_3299	Cimifugin	Organoheterocyclic compounds	1-benzopyrans	69565.4	64497.5	62788.7	69624.9	59571.8	74597.4	5051.46	5915.23	5470.12	5797.19	5548.49	6131.23	1.34617	1.1606e-09	4.0261e-08	11.715	3.5503	up	0
POS_5937	Fludrocortisone acetate	Steroids and steroid derivatives	Pregnane steroids	7386.83	7590.16	7150.7	7932.93	7311.91	7695.02	43664	46884.1	50393.3	43780.9	48434.8	50042.9	1.34488	2.9171e-10	1.2703e-08	0.15966	-2.6469	down	C00762
POS_280	Histamine	Organonitrogen compounds	Amines	92716.6	57119.3	54722.3	59487	61389.9	62648.5	3893.56	4396.31	4635.95	4670.27	4236.73	4246.46	1.35045	1.2018e-11	1.3447e-09	13.591	3.7646	up	C00388
POS_4589	Hydrocortisone	Steroids and steroid derivatives	Hydroxysteroids	2282.09	3140.81	2015.41	2619.29	2400.81	2684.99	49443.9	51427.3	43462	47159	32995.4	41910.7	1.32994	2.098e-07	1.689e-06	0.057934	-4.1094	down	C00735
POS_1248	Phosphorylcholine	Organonitrogen compounds	Quaternary ammonium salts	76293.3	75888.6	72859.1	76832.8	76822	80342.5	21205	18324.4	20446.6	21337.6	18408.8	17963.6	1.35132	7.6795e-12	1.3389e-09	3.9027	1.9645	up	0
POS_2487	Lofexidine	Benzenoids	Halobenzenes	306150	253439	254088	317622	230693	325706	101208	98160.9	76908.5	80130.5	59956.9	116456	1.28899	4.8794e-06	2.2154e-05	3.1115	1.6376	up	0
POS_3084	9-Oxooctadeca-10,12-dienoic acid	Fatty Acyls	Lineolic acids and derivatives	115780	112681	113054	125373	100276	138149	286626	264489	245579	240002	198508	317989	1.26362	4.8608e-05	0.00015785	0.45547	-1.1346	down	0
POS_1313	Tilarginine	Carboxylic acids and derivatives	Amino acids, peptides, and analogues	607314	591074	333668	398547	458110	544824	128885	134621	157144	140597	93071.7	107061	1.2737	2.8254e-05	9.807e-05	3.6663	1.8743	up	C03884
POS_8249	1-Stearoyl-sn-glycero-3-phosphocholine	Glycerophospholipids	Glycerophosphocholines	64351.3	66133.4	51895.6	63817	57074.6	64068	13455	18836.5	11437.5	12847.3	13784.7	14353.2	1.33606	2.9171e-08	3.7261e-07	4.2919	2.1016	up	C04230
POS_8492	Flavone base + 4O, O-MalonylHex	Flavonoids	Flavonoid glycosides	75496.9	64221.6	62988	76187.6	64216.3	80711.6	29316.4	30963.6	23257.9	23989.4	20339.9	27002	1.3087	9.9889e-07	6.4224e-06	2.699	1.4324	up	0
POS_3234	(3As,6S,7R,8aR)-8-hydroxy-6,8-dimethyl-3-methylidenespiro[4,5,6,8a-tetrahydro-3aH-cyclohepta[b]furan-7,5'-oxolane]-2,2'-dione	Prenol lipids	Terpene lactones	53558.8	46515.9	46479.9	58657.1	43014	59311.6	18020.6	17717.6	15445.6	16359.9	14630.8	18702	1.30384	1.9276e-06	1.0736e-05	3.0213	1.5952	up	0
POS_5034	4-Hydroxy-3-[(2E,6E)-4-hydroxy-3,7,11-trimethyldodeca-2,6,10-trienyl]benzoic acid	Prenol lipids	Sesquiterpenoids	4356.99	3561.97	3087.1	3111.73	3673.99	4435.53	20486.9	21946.8	19100.1	18134.3	15294.4	23791.6	1.32147	8.4156e-07	5.522e-06	0.18058	-2.4693	down	0
POS_4983	9-Methoxycamptothecin	Alkaloids and derivatives		2955.17	2888.97	1449.91	2512.9	3476.51	3869.05	23473.6	29818.4	31005.6	18038.2	25970.2	26572.4	1.30109	2.023e-06	1.1074e-05	0.11	-3.1844	down	0
POS_9576	Biliverdin	Others		7236.16	6751.23	7416.13	6262.45	6896.83	7690.83	3575.67	3955.63	2498.33	3054.9	2680.91	3952.27	1.29168	3.1246e-06	1.5838e-05	2.1311	1.0916	up	0
POS_3622	Citalopram	Benzenoids	Phenylbutylamines	10366.9	10315	10308	8910.47	7623.14	8810.5	23720.4	22770.5	23864.6	22270.1	19099.8	25506	1.32417	4.7184e-07	3.4771e-06	0.40195	-1.3149	down	C07572
POS_8631	Cucurbitacin D	Steroids and steroid derivatives	Cucurbitacins	11037.2	4719.29	12740.9	15093.1	9253	17820	35214.7	40907.4	33592.4	32983.7	17285.2	24159.9	1.12366	0.0019631	0.0042549	0.38856	-1.3638	down	0
POS_8896	Isogomphrenin I	Organooxygen compounds	Carbohydrates and carbohydrate conjugates	9767.56	6881.07	7883.56	7967.63	8177.5	8660.61	21862.8	22106.1	19422.3	18452.5	17257	17338.1	1.31357	1.167e-06	7.2597e-06	0.40781	-1.294	down	0
POS_5902	Morusin	Others		1873.57	2581.93	11960.4	3301.95	10510.5	2576.43	17172.4	16602.7	14559.2	15436.4	14867	17501.8	1.18172	0.0007138	0.0017053	0.38608	-1.373	down	0
POS_265	N-Acetylimidazole	Organoheterocyclic compounds	Imidazoles	20776.9	21851.8	17566.5	20043.9	20705.2	19187.5	8859.93	8002.28	7736.2	9004.3	12485.8	9248.83	1.31005	2.2687e-06	1.2142e-05	2.1545	1.1074	up	0
POS_4303	N(4)-Acetylsulfadimethoxine	Benzenoids	Benzenesulfonamides	7694.62	9016.63	7588.58	14387.9	8061.11	3355.43	25037.9	24185.5	21651.1	27416.6	27689.5	26376	1.28835	9.2371e-06	3.7181e-05	0.33403	-1.582	down	0
POS_12053	Naadp	Nucleosides, nucleotides, and analogues		10232.6	8675.53	9342.27	9106.56	9071.49	9774.26	33839.7	37007.1	28698.6	28469.5	30146.7	34659.2	1.33084	1.6703e-07	1.4161e-06	0.28609	-1.8055	down	0
POS_7157	Petunidin 3-glucoside	Flavonoids	Flavonoid glycosides	8040.26	4145.69	6203.87	3224.05	4270.61	6708.82	20528.4	22803	20526.4	21218.4	19754	21914.2	1.34057	6.1837e-09	1.3464e-07	0.23247	-2.1049	down	C12139
POS_6460	Purpurein	Cinnamic acids and derivatives	Hydroxycinnamic acids and derivatives	11937	10679.8	10157.9	11306.7	11177.7	12683.3	3619.62	3209.56	2407.81	2398.33	2110.01	3531.52	1.33175	3.2933e-08	3.9548e-07	3.89	1.9598	up	0
NEG_3195	(2S,3S)-3,4',5,7-Tetrahydroxyflavanone	Flavonoids	Flavans	273547	249832	207613	258174	215089	269465	103990	106303	100804	119012	97734.7	121364	1.30987	1.4519e-06	8.5334e-06	2.2184	1.1495	up	0
NEG_3683	FA 18:3;2O	Fatty Acyls	Fatty acids and conjugates	18816.4	5944.44	18845.9	20373.1	16487.8	25216.9	279800	222792	99183.2	92863.4	227020	278368	1.15599	0.00098035	0.002274	0.086866	-3.5251	down	0
NEG_661	Histidine	Carboxylic acids and derivatives	Amino acids, peptides, and analogues	129802	164372	157660	131882	153978	137167	55267	48681	55254.5	63961.4	64023.2	46883.5	1.32858	1.6266e-07	1.3914e-06	2.6763	1.4202	up	C00135
NEG_4085	FA 18:3;3O	Fatty Acyls	Fatty acids and conjugates	13893.1	12501.6	10852.7	12741.7	10714.7	14691.9	56454.8	56899.1	51527.3	50136.8	45786.3	61248	1.33621	6.6515e-08	6.8518e-07	0.22917	-2.1255	down	0
NEG_11124	Luteolin-7,3'-di-O-gflucoside	Flavonoids	Flavonoid glycosides	69292.4	74891.6	72765.3	81525.5	66983	80760.1	19184.9	18359.1	16345.3	16013.3	14943	18459.4	1.3418	2.7447e-09	7.8749e-08	4.3784	2.1304	up	0
NEG_10269	(2-Hydroxy-3-octadec-9-enoyloxypropyl) 2-(trimethylazaniumyl)ethyl phosphate	Glycerophospholipids	Glycerophosphocholines	2.94226e+06	33594	34020.5	230595	30555	29789.4	223952	232488	265070	301376	447943	239974	1.07864	0.0027747	0.0057535	0.2515	-1.9914	down	0
NEG_8753	Phosphatidylcholine lyso 18:1	Glycerophospholipids	Glycerophosphocholines	482707	5153.35	4679.94	32669.9	6136.87	4952.18	37771.3	39093.3	64492.2	67429.5	81787.2	38517.4	1.10755	0.0015437	0.0034311	0.19542	-2.3554	down	0
NEG_3451	Demethylwedelolactone	Others		177310	164845	81984.9	107234	76876.4	227359	39762.3	40040	36685.7	33304.9	25029.7	41463.8	1.07205	0.0050268	0.0097483	3.6524	1.8688	up	0
NEG_476	2,5-Dihydroxybenzaldehyde	Organooxygen compounds	Carbonyl compounds	12894.5	13283.3	10801.8	12067.2	9324.03	13330.1	44927.2	49920.1	46524.4	45291.3	42842.9	46683.5	1.34565	6.2874e-10	2.4093e-08	0.2555	-1.9686	down	C05585
NEG_9169	3-[[2,3-Dihydro-2-(4-hydroxy-3-methoxyphenyl)-3-(hydroxymethyl)-7-methoxybenzofuran]-5-yl]propyl beta-D-glucopyranoside	Flavonoids		7271.54	7873.75	7196.52	8139.48	7724.83	10432.9	20073.5	20331.1	18648.3	21417.2	18929.1	21732.1	1.32993	7.7009e-08	7.6056e-07	0.40981	-1.287	down	0
NEG_1194	3-Phosphoglycerate	Organooxygen compounds	Carbohydrates and carbohydrate conjugates	29218.1	37103.6	31442.6	31425.5	32032.4	41952.8	9986.71	7454.36	10068.7	9598.57	12983.1	9347.26	1.3267	6.8523e-07	4.7916e-06	3.512	1.8123	up	C00597
NEG_13452	Apigenin 7-O-(2G-rhamnosyl)gentiobioside	Others		10999	12247.3	11679.6	13680.7	10879.3	15895.7	5342.18	5532.9	4787.68	4809.96	5120.17	5058.05	1.29863	4.9411e-06	2.2328e-05	2.5206	1.3338	up	0
NEG_2640	Baicalein	Flavonoids	Flavones	14418.7	12000.3	10863.1	12413.9	11850.9	13630.6	2807.29	2673.19	2915.11	2630.25	2347.06	2425.49	1.34466	2.8157e-09	7.8749e-08	4.6151	2.2063	up	C10023
NEG_844	Caffeyl alcohol	Cinnamic acids and derivatives		4689.24	4122.33	3492.96	3861.49	3801.8	4380.95	20625.8	20169.3	18051.1	18437.6	16324.2	19336.6	1.34394	6.8508e-09	1.3964e-07	0.20888	-2.2593	down	0
NEG_4052	Coumaric acid 4-O-glucoside	Organooxygen compounds	Carbohydrates and carbohydrate conjugates	8198.75	8103.19	7670.18	6288.18	6188.59	7158.32	32518.1	34767.3	31194.8	28291.7	28049.3	32796.4	1.34146	1.1922e-08	1.9693e-07	0.22647	-2.1426	down	0
NEG_5086	Dehydroepiandrosterone sulfate	Steroids and steroid derivatives	Sulfated steroids	2443.35	2366.11	1618.66	2609.91	1732.73	1281.74	33146.9	33970.4	28415.9	31031.8	27608.3	44313	1.31854	1.2098e-06	7.3823e-06	0.058095	-4.1055	down	C04555
NEG_14460	Ginsenoside Rf	Others		853.482	7356.89	5839.55	29858.3	6546.89	8289.94	24957.1	28844.9	26527.8	29979.9	24583.4	33054.4	1.07122	0.004671	0.0091696	0.41364	-1.2736	down	0
NEG_9365	Kukoamine B	Others		22772.7	6260.48	6237.22	6313.42	5039.68	6432.03	21453	19498.1	21125.2	21837.8	18043.4	19969.6	1.34084	6.3927e-09	1.3609e-07	0.29804	-1.7464	down	0
NEG_5570	Laricin	Organooxygen compounds	Carbohydrates and carbohydrate conjugates	24624.4	15617.5	15565.4	17625	13507.1	20697.6	36565.2	32760.5	31953.4	32347.9	31428.7	39390.8	1.29583	4.7246e-06	2.1656e-05	0.48724	-1.0373	down	0
NEG_7980	Myricetin-3-Galactoside	Flavonoids	Flavonoid glycosides	16882.3	15308.4	16056.2	20660.7	13597.8	19154.4	4625.98	6083.5	5274.37	4937.09	4305.9	6479.1	1.2883	5.4081e-06	2.421e-05	3.2086	1.682	up	0
NEG_4090	Nephromopsic acid	Organoheterocyclic compounds	Gamma butyrolactones	10249.1	10451.7	12364.2	10667.9	9229.15	10294.9	24792.7	22808.5	25887.1	27757.4	24110.7	25415.2	1.33142	5.1293e-08	5.6024e-07	0.42189	-1.2451	down	0
NEG_2350	Rubiadin	Benzenoids	Anthraquinones	6553.87	10500.1	9341.44	4538.84	9400.16	4845.75	1934	2127.22	2279.89	2301.35	1580.21	2140.81	1.15435	0.00077313	0.0018288	3.7491	1.9065	up	0
NEG_14814	Saikosaponin b2	Others		95894.1	336.287	216.845	508.387	377.034	281.829	1340.97	1029.19	2350.6	2230.98	2911.01	2003.23	1.15349	0.00056876	0.00139	0.17398	-2.523	down	0
NEG_349	Salicyl alcohol	Benzenoids	Benzyl alcohols	267.155	615.106	336.915	349.358	531.48	376.56	24412.6	23764.9	20833.6	18899.3	18075.8	23565.1	1.33978	3.3025e-08	3.9548e-07	0.020465	-5.6107	down	C02323
POS_3240	2-Monomyristin	Glycerolipids	Monoradylglycerols	501175	431184	433305	462884	404688	490565	2.43104e+06	2.58545e+06	2.18351e+06	1.7653e+06	1.84689e+06	2.61781e+06	1.31256	1.9843e-06	1.0988e-05	0.1986	-2.3321	down	0
POS_8809	3-{7-[5-(1-hydroxynonadec-4-en-1-yl)oxolan-2-yl]heptyl}-5-methyl-5H-furan-2-one	Others		237777	200908	300855	47636.3	283577	77277.1	1.01867e+06	1.17674e+06	958191	992421	771758	963337	1.31263	2.1419e-06	1.1574e-05	0.18573	-2.4287	down	0
POS_6059	Taraxasterol	Prenol lipids	Triterpenoids	177006	263907	414930	132718	381268	141210	59698.3	70203.1	74674.1	67384.1	74438.7	81096.4	1.03725	0.0050251	0.0097483	3.7447	1.9048	up	0
POS_7676	[3,4,5-Trihydroxy-6-[(3,4,5-trihydroxyoxan-2-yl)oxymethyl]oxan-2-yl] 2,6,6-trimethylcyclohexene-1-carboxylate	Organooxygen compounds	Carbohydrates and carbohydrate conjugates	4601.13	4220.17	4105.94	5499.32	4044.18	4387.37	12735.4	14376.4	12577.2	12236.1	12297.9	14106.9	1.33977	2.7993e-08	3.7261e-07	0.34097	-1.5523	down	0
POS_6080	4-Hydroxy-6-methyl-3-methylidene-5-[5-[(2R,3R,4S,5S,6R)-3,4,5-trihydroxy-6-(hydroxymethyl)oxan-2-yl]oxypentan-2-yl]-3a,4,7,7a-tetrahydro-1-benzofuran-2-one	Prenol lipids	Terpene lactones	8122.83	9684.92	9000.3	9288.27	7184.51	9299.02	27639.2	29030.5	24814.3	27296.5	25429.6	30707.3	1.33852	3.1063e-08	3.9156e-07	0.32349	-1.6282	down	0
POS_3579	Desmedipham	Benzenoids	Phenylcarbamic acid esters	6765.73	8474.73	8268.3	8467.68	6932.25	7429.15	45790.9	49361.4	43222.7	41941.9	42109.2	52327.6	1.34315	1.1229e-08	1.9461e-07	0.17283	-2.5325	down	0
POS_10122	L-Glutathione (oxidized form)	Carboxylic acids and derivatives	Amino acids, peptides, and analogues	14394.1	16532.2	23792.3	17795.7	23283.5	11270	55754.3	57712.5	54075.1	45018.1	43884.2	42916.8	1.28701	1.2784e-05	4.9385e-05	0.37149	-1.4286	down	0
NEG_2615	Formononetin	Isoflavonoids	O-methylated isoflavonoids	154865	87016.9	81461.8	100755	77555	98624.2	37223.7	37991.9	36048	36649.6	33149.5	39649.7	1.31499	6.3843e-07	4.4972e-06	2.4217	1.276	up	C00858
NEG_2683	(2r)-1-(2,4-Dihydroxyphenyl)-2-(4-methoxyphenyl)propan-1-one	Flavonoids		1.67355e+06	437022	417196	558795	403135	393819	210412	211173	205809	203977	187452	205558	1.27043	1.1576e-05	4.5266e-05	2.166	1.115	up	0
NEG_2404	Palmitic acid	Fatty Acyls	Fatty acids and conjugates	289373	83435.5	65514.8	106578	79636.6	143930	187157	242618	194058	206424	346677	212754	1.10932	0.0013125	0.0029867	0.4137	-1.2733	down	C00249
NEG_1903	Myristic acid	Fatty Acyls	Fatty acids and conjugates	107159	28008.1	31137.2	53373.3	37355.7	27669.3	82008.4	85786.7	118679	113323	119446	81437.6	1.22709	8.1625e-05	0.0002436	0.35468	-1.4954	down	C06424
NEG_2539	9-(2,3-Dihydroxypropoxy)-9-oxononanoic acid	Fatty Acyls	Fatty acids and conjugates	50561	57287.9	56113.7	65168.1	51898.8	77130.2	199592	212091	192695	186535	185996	226246	1.33581	3.9925e-08	4.6082e-07	0.30679	-1.7047	down	0
NEG_3531	1-(2,4-Dihydroxyphenyl)-2-(3,5-dimethoxyphenyl)propan-1-one	Flavonoids		40149.3	18954	18455.8	25739.5	17114.6	23838.5	10137.4	10668.4	8232.47	8208.89	7882.03	10765.8	1.24152	5.9191e-05	0.00018653	2.235	1.1603	up	0
NEG_8379	2-(3,4-Dimethoxyphenoxy)-6-[(3,4,5-trihydroxyoxan-2-yl)oxymethyl]oxane-3,4,5-triol	Organooxygen compounds	Carbohydrates and carbohydrate conjugates	6007.63	5084.86	5129.36	5353.94	5067.31	5689.32	23642.7	21446.2	23156.9	21759.2	17056.6	21662.2	1.33339	9.4387e-08	9.1041e-07	0.24541	-2.0267	down	0
NEG_3681	2-Dodecoxyethyl hydrogen sulfate	Organic sulfuric acids and derivatives	Sulfuric acid esters	6384.71	2717.47	1613.04	4108.09	3284.48	6172.95	7677.15	9461.39	7675.18	8669.57	6386	6021.1	1.11848	0.0015386	0.0034278	0.46797	-1.0955	down	0
NEG_5076	4-O-Feruloylquinic acid	Organooxygen compounds	Alcohols and polyols	30993.2	30782.5	21554.2	33096	23070.4	33360	8342.9	8943.35	12136.3	8644.95	7434.69	8357.37	1.27685	2.0104e-05	7.2952e-05	3.1607	1.6603	up	0
NEG_1924	Dodecanedioic acid	Fatty Acyls	Fatty acids and conjugates	65656.1	60928	61529	66984.3	56331.3	73756.4	28957.7	29638.7	25946.7	26504.9	24808.9	31227.8	1.31574	5.9854e-07	4.2474e-06	2.2949	1.1984	up	C02678
NEG_2392	Isoliquiritigenin	Linear 1,3-diarylpropanoids	Chalcones and dihydrochalcones	24562	19325.8	16985.2	23277.4	16885.3	23788.7	9767.42	9994.59	9624.08	9201.4	8254.22	10150.6	1.26252	3.1606e-05	0.00010737	2.1111	1.078	up	C08650
NEG_810	Phenylpyruvic acid	Benzenoids	Phenylpyruvic acid derivatives	43338.4	38463.3	37847.8	43610.4	37352.9	46158	14129.4	13945.2	12803.7	12278.3	11126.7	15235.8	1.32937	6.9507e-08	7.0838e-07	3.0699	1.6182	up	C00166
NEG_8698	Protohypericin	Others		21474.3	18141.5	19979.7	27877.1	18360.1	21788.8	5120.38	6305.9	4550.39	3771.69	3639.08	5111.07	1.28799	4.069e-06	1.9108e-05	4.4696	2.1601	up	0
NEG_2940	Pseudobaptigenin	Isoflavonoids	Isoflav-2-enes	42355.2	22985.1	21631.9	24210.8	20459.5	24054.1	9319.01	9949.25	9721.56	9319.94	9292.61	9785.45	1.33983	9.9935e-09	1.8304e-07	2.37	1.2449	up	C10522
POS_7501	Cyclo(VVFF)	Carboxylic acids and derivatives	Amino acids, peptides, and analogues	74792.5	69703	72049.4	82135.4	62087	81990.1	29020.5	28031	20447.4	28551.3	22934.1	30284.8	1.31156	7.0805e-07	4.8799e-06	2.7724	1.4711	up	0
POS_5930	5-Chloro-3-[(E)-3,4-dihydroxy-3,5-dimethylhept-1-enyl]-7,8-dihydroxy-7-methyl-8H-isochromen-6-one	Organoheterocyclic compounds		43138.1	37444.8	29458.8	40159.9	36342.2	40308.8	60741.3	140728	183788	200851	149909	58479.6	1.00872	0.0067627	0.012778	0.27748	-1.8495	down	0
POS_483	L-Norleucine	Carboxylic acids and derivatives	Amino acids, peptides, and analogues	998586	745280	689010	1.02017e+06	688964	1.10284e+06	341350	358929	237275	183197	179783	380629	1.22189	0.00013271	0.0003784	3.031	1.5998	up	C01933
POS_646	4-Guanidinobutyric acid	Carboxylic acids and derivatives	Amino acids, peptides, and analogues	535301	520492	372541	207367	390853	497128	651639	877118	951949	930449	616232	812454	1.15578	0.00072955	0.0017386	0.493	-1.0203	down	C01035
POS_577	2-Phenylacetamide	Benzenoids	Phenylacetamides	484152	485297	537891	513168	475979	547808	241158	208583	219758	265179	243326	235208	1.33652	2.5097e-08	3.5288e-07	2.1739	1.1203	up	C02505
POS_5465	7-Ketocholesterol	Steroids and steroid derivatives	Cholestane steroids	75885.1	63599.9	78815.4	78704.3	74065	35963	146659	185950	190438	150627	146159	210374	1.26818	4.3856e-05	0.00014438	0.38573	-1.3744	down	0
POS_5095	Campesterol	Steroids and steroid derivatives	Ergostane steroids	113541	130040	141054	76164.5	202523	58615.9	336098	307820	330736	325231	323504	263506	1.25616	4.0445e-05	0.00013453	0.38692	-1.3699	down	0
POS_3288	Cyclic cmp	Organooxygen compounds	Carbohydrates and carbohydrate conjugates	959731	1.09193e+06	1.07131e+06	781441	1.07172e+06	604345	281809	308538	280570	259301	248497	312458	1.23894	5.3061e-05	0.00017011	3.2787	1.7131	up	0
POS_642	Indole-3-carboxaldehyde	Organoheterocyclic compounds	Indoles	109201	91128.2	86516.8	115631	81172.2	113167	47946.3	52895	44437.6	42756.4	39380	55006.5	1.24831	4.7483e-05	0.00015472	2.0719	1.0509	up	C08493
POS_1504	N,N-Dimethylarginine	Carboxylic acids and derivatives	Amino acids, peptides, and analogues	250912	242515	136869	209133	148896	200938	63246.7	103116	89427.2	77754.8	33193.8	61756.7	1.19501	0.00035049	0.00089301	2.6279	1.3939	up	C03626
POS_1252	Phosphocholine	Organonitrogen compounds	Quaternary ammonium salts	165743	162634	37132.8	144111	117928	141820	18400.1	46700.1	58114.2	54393.6	33466.4	45615.9	1.0652	0.0048251	0.0094335	2.8219	1.4967	up	C00588
POS_722	Triethanolamine	Organonitrogen compounds	Amines	913180	429862	356153	431906	325109	484306	192889	139833	362668	175174	97948.1	116881	1.13423	0.0015814	0.003507	2.2414	1.1644	up	C06771
POS_4584	alpha-Aminoorcein	Organoheterocyclic compounds	Phenoxazines	2243.31	19169.6	5577.98	4210.26	24788.4	5788.21	30157.2	32654.1	24118.8	24792.6	19344.5	32535.1	1.03222	0.0078047	0.014416	0.43668	-1.1954	down	0
POS_343	Norvaline	Carboxylic acids and derivatives	Amino acids, peptides, and analogues	24290.2	20488.4	19381.2	25118.1	18570.7	26420.4	11743.5	12031.4	10343.9	9457.82	8875.36	12857.8	1.24141	6.5802e-05	0.00020401	2.0207	1.0149	up	C01826
POS_623	Tryptophol	Organoheterocyclic compounds	Indoles	41117.8	34473.4	32990.9	44957.8	30868.1	46092.4	19040.5	19879.7	16877.8	16666.3	15915.2	20360.4	1.23269	9.8984e-05	0.0002891	2.0899	1.0635	up	C00955
NEG_3428	9,10-Epoxystearic acid	Fatty Acyls	Lineolic acids and derivatives	425079	60610.3	51995.8	98228.9	65245	72710.3	138427	129376	201172	232307	246817	133660	1.09816	0.0016625	0.0036529	0.38691	-1.3699	down	C19620
NEG_435	L-Malic acid	Hydroxy acids and derivatives	Beta hydroxy acids and derivatives	395770	882385	882494	807774	743423	278913	711547	1.72348e+06	1.54539e+06	1.93079e+06	1.7734e+06	1.55255e+06	1.05497	0.0046425	0.0091325	0.46703	-1.0984	down	C00149
NEG_2393	Liquiritigenin	Flavonoids	Flavans	277176	122046	107295	133296	106297	117474	49578.5	49799.8	48916.3	49465.5	47711.5	48718.1	1.3274	1.0748e-07	9.9007e-07	2.392	1.2582	up	C09762
NEG_1113	Tyrosine	Carboxylic acids and derivatives	Amino acids, peptides, and analogues	4.7399e+06	3.53451e+06	3.36849e+06	4.11365e+06	3.41309e+06	4.09976e+06	1.98212e+06	2.14442e+06	969880	902653	1.97031e+06	2.04784e+06	1.23678	7.6813e-05	0.00023161	2.2197	1.1504	up	C00082
NEG_1677	Di-tert-butyl dicarbonate	Organic carbonic acids and derivatives		5918.18	5963.49	5953.24	7117.76	5194.78	8220.01	16887.5	15759.1	13491.1	14299.8	12466.1	15709.2	1.29577	6.1029e-06	2.6575e-05	0.43943	-1.1863	down	0
NEG_395	l-Isoleucine	Carboxylic acids and derivatives	Amino acids, peptides, and analogues	4114.64	3072.78	3470.03	3740.21	3481.28	3926.06	1849.23	1498.6	706.437	1686.24	2003.51	2166.54	1.24179	6.0462e-05	0.00018929	2.142	1.099	up	C00407
NEG_4878	Pinoresinol	Lignans, neolignans and related compounds		16182.6	15195.2	14050.3	17048	13754.3	19943.4	33085.8	34150.2	34374.8	33672.1	28755.7	38660.3	1.30179	3.3077e-06	1.6425e-05	0.47356	-1.0784	down	0

## Sheet: MS VS DB
ID	Name	Class	Subclass	MS-1	MS-2	MS-3	MS-4	MS-5	MS-6	DB-1	DB-2	DB-3	DB-4	DB-5	DB-6	VIP	P_value	FDR	Fold Change	log2(FC)	Type	KEGG
POS_6964	Sucrose 6-benzoate	Organooxygen compounds	Carbohydrates and carbohydrate conjugates	740393	799440	556001	569480	477626	876687	2787.67	2030.44	1605.83	2367.33	2166.15	2235.27	1.27528	1.1446e-06	4.4754e-06	304.683	8.25117	up	0
NEG_6571	5-{[4-(beta-D-Glucopyranosyloxy)benzyl]oxy}-3-hydroxy-3-methyl-5-oxopentanoic acid	Organooxygen compounds	Carbohydrates and carbohydrate conjugates	1.419e+06	1.62297e+06	1.29526e+06	1.36549e+06	1.2322e+06	1.91158e+06	25580	22135.6	24995	26615.5	25869.6	24779	1.29936	6.5089e-08	3.8712e-07	58.9866	5.88232	up	0
POS_6508	Luteolin 7-galactoside	Flavonoids	Flavonoid glycosides	216593	499267	422970	164827	424732	159434	10914.6	12481.2	7462.87	5408.09	6557.14	2003.49	1.12184	0.00055393	0.0011819	42.1141	5.39623	up	0
[truncated: 322 more rows]
