# Supplementary material for: Metabolomics and biochemical analyses in functional active components of ripe mulberry fruits
Source: Research Square preprint supplement (doi:10.21203/rs.3.rs-7531724/v1), 2025-10-07
Supplement: Supplementary file 5 [file e549df352a8140d9658c465d.xlsx]

## Sheet: Sheet1
Supplementary Table S1. The identified metabolites information of four mulberry fruit varieties
ID	rt(min)	m/z	Name	adduct	Formula	Superclass	Class	KEGG	score	AS-1	AS-2	AS-3	AS-4	AS-5	AS-6	DB-1	DB-2	DB-3	DB-4	DB-5	DB-6	KD-1	KD-2	KD-3	KD-4	KD-5	MS-1	MS-2	MS-3	MS-4	MS-5	MS-6	QC-1	QC-2	QC-3	QC-4
NEG_4430	0.567	338.989	alpha-D-Glucose 1,6-bisphosphate	[M-H]-	C6H14O12P2	Organic oxygen compounds	Organooxygen compounds	C01231	0.883	53105.4	54526.2	56091	52588.4	56387.8	51744.2	40967.8	37103.1	40099.6	43312.8	36925.2	37598.1	49410.8	50100	50876.1	52964.1	57525.8	39915.5	39098.3	38194.6	35916.3	45739.8	41245.4	22183	27334.4	27328.6	26868.1
NEG_1556	0.577	209.034	Galactaric acid	[M-H]-	C6H10O8	Organic oxygen compounds	Organooxygen compounds	C00879	0.953	375898	336939	359529	339711	421724	363402	360561	351211	422977	337195	337043	380469	267695	249284	195323	252089	256798	238568	192091	225272	215717	213554	231292	191883	183917	243699	184286
POS_2501	0.58	261.035	beta-D-Mannose 6-phosphate	[M+H]+	C6H13O9P	Organic oxygen compounds	Organooxygen compounds	C00275	0.881	15807.9	14029.8	18415.4	16682.7	14712.5	14044.6	17435	15348.5	14270	16409.8	16792.2	15569	19729.2	19598	21634.8	18919	18703.2	13412	14254.1	13042.6	12950.9	8151.49	14072.2	14294.2	13098.9	14911.4	14120.7
NEG_1194	0.581	184.986	3-Phosphoglycerate	[M-H]-	C3H7O7P	Organic oxygen compounds	Organooxygen compounds	C00597	0.886	17699	19419.7	19004.4	20818.1	21410	20928.3	32482.5	34964.6	34336.9	33167.8	30181.3	27212.3	37103.6	31442.6	31425.5	32032.4	41952.8	9986.71	7454.36	10068.7	9598.57	12983.1	9347.26	15701.7	14653.7	21597.6	14700.3
NEG_457	0.582	135.032	Threonic acid	[M-H]-	C4H8O5	Organic oxygen compounds	Organooxygen compounds	C01620	0.814	137109	158818	147457	155614	174924	164476	46149.5	50756.1	55579.4	62955.1	38118.7	38779.3	64222.2	64757.8	51648.1	65056.2	61024.4	26552.8	27248.9	28752.7	30437	36291.5	29190.2	39946.5	36365.2	58553.5	36438.1
NEG_2498	0.583	259.025	Glucose 6-phosphate	[M-H]-	C6H13O9P	Organic oxygen compounds	Organooxygen compounds	C00092	0.938	290515	327351	288798	294053	322603	350677	387350	406910	533159	344814	320965	362207	454344	371811	369137	372379	378634	273120	255566	271163	297768	270105	228914	257576	246271	312117	249390
POS_502	0.586	134.046	2-Aminobutanedioate;hydron	[M+H]+	C4H7NO4	Organic acids and derivatives	Carboxylic acids and derivatives		0.947	28981.1	23957.1	33746.9	28436.5	25173.5	24765.1	27842.4	25634.6	26185.8	24602.3	29263.5	26166.6	30266.5	30440.9	35009.5	28939.1	27008.2	22801.4	23048	24087.9	22821.1	17404.2	22753.5	23789.7	23122.6	26369.6	23446.6
NEG_1313	0.586	193.036	2-Dehydro-D-gluconic acid	[M-H]-	C12H24O9	Organic oxygen compounds	Organooxygen compounds		0.88	92003.8	233830	117862	215912	263591	63863.2	82167	151461	122107	158597	92901.9	72937.5	36.4963	5.36819	95086.8	229398	81785.2	67825.6	49036	79681.3	79202.2	179210	53345.1	90552.2	91647	162324	103252
POS_974	0.587	164.091	1-Deoxynojirimycin	[M+H]+	C6H13NO4				0.836	10894.8	11827.3	10543.5	10203.8	10068.5	17898.8	106943	60884.1	80712.2	56157.4	95923.1	79201	108819	186786	202982	198555	261266	73348.5	96858.4	63216.3	114313	129063	75577	83354	87630.7	97113.8	73001.9
POS_1248	0.588	184.072	Phosphorylcholine	[M+H]+	C5H15NO4P+	Organic nitrogen compounds	Organonitrogen compounds		0.947	55578.9	56894.9	57699.7	55588.3	53115.8	56998.8	68795.2	57788.2	60453.4	53682.3	67810.8	60107.6	75888.6	72859.1	76832.8	76822	80342.5	21205	18324.4	20446.6	21337.6	18408.8	17963.6	48336.9	44441.8	51875.5	47563.7
NEG_2738	0.59	275.022	6-Phosphogluconic acid	[M-H]-	C6H13O10P	Organic oxygen compounds	Organooxygen compounds	C00345	0.8	38589.7	41764.7	40971.9	42071.2	40370.3	43599.7	27313.4	29234	36899.4	28588.1	25558.8	23988.3	39055.1	37452.5	35603.9	38448.1	38687.1	22860.6	21614.7	23446.2	23024.4	25825.1	22340.6	25891.5	25185.6	30794.5	25192.8
NEG_1335	0.59	195.051	Gluconic acid	[M-H]-	C6H12O7	Organic acids and derivatives	Hydroxy acids and derivatives	C00257	0.862	385106	521395	416474	533324	453262	557159	533586	333572	793439	346791	305161	300817	419940	410557	383687	432517	320577	236539	245551	266902	281665	302215	219811	440042	419860	482621	449566
POS_3101	0.602	296.067	Acetylsulfamethoxazole	[M+H]+	C12H13N3O4S	Benzenoids	Benzene and substituted derivatives		0.714	105544	105810	104180	105193	110826	86029.9	84281	96812.6	81881.4	84209.9	108519	75033.4	86970.2	101576	100575	90768.4	89289.6	295241	313326	302363	237817	288768	271044	127032	129241	142486	125274
NEG_661	0.613	154.063	Histidine	[M-H]-	C6H9N3O2	Organic acids and derivatives	Carboxylic acids and derivatives	C00135	0.944	127402	155786	136508	158748	155342	161898	141290	158658	236832	137235	140515	119881	164372	157660	131882	153978	137167	55267	48681	55254.5	63961.4	64023.2	46883.5	107316	101696	134660	102643
NEG_187	0.614	104.037	Serine	[M-H]-	C3H7NO3	Organic acids and derivatives	Carboxylic acids and derivatives	C00065	0.937	147216	169001	142359	158887	165249	177446	158771	181776	274154	157333	161207	146677	156062	143661	119577	149419	130811	150137	135905	146606	172514	174475	141893	123156	113809	151198	118142
NEG_536	0.617	146.052	Glutamic acid	[M-H]-	C5H9NO4	Organic acids and derivatives	Carboxylic acids and derivatives	C00025	0.89	244530	258388	230550	269426	269103	292305	147893	183498	236430	130069	158083	153615	269542	234171	215976	226771	216469	477356	362645	385456	484881	428237	415027	254072	225012	275425	248505
NEG_415	0.619	131.049	Asparagine	[M-H]-	C4H8N2O3	Organic acids and derivatives	Carboxylic acids and derivatives	C00152	0.805	3.0205e+06	3.66208e+06	3.13311e+06	3.6305e+06	3.82329e+06	3.77248e+06	3.5544e+06	3.93805e+06	6.48687e+06	3.55543e+06	3.67834e+06	3.09573e+06	4.99867e+06	4.50476e+06	3.70251e+06	4.34718e+06	3.95835e+06	3.07372e+06	2.41739e+06	2.85348e+06	3.68593e+06	3.56634e+06	2.70975e+06	2.98596e+06	2.69359e+06	3.80781e+06	2.84055e+06
NEG_530	0.622	145.064	D-Glutamine	[M-H]-	C5H10N2O3	Organic acids and derivatives	Carboxylic acids and derivatives	C00819	0.798	4.61644e+06	5.33009e+06	4.74776e+06	5.45898e+06	5.77356e+06	5.87283e+06	3.57677e+06	3.96138e+06	6.44088e+06	3.68062e+06	3.81314e+06	3.17542e+06	4.11405e+06	3.5755e+06	3.03942e+06	3.46789e+06	3.2052e+06	2.55598e+06	2.03966e+06	2.35755e+06	2.9739e+06	2.75575e+06	2.20531e+06	2.961e+06	2.68384e+06	3.70387e+06	2.83038e+06
NEG_1009	0.625	173.105	Arginine	[M-H]-	C6H14N4O2	Organic acids and derivatives	Carboxylic acids and derivatives	C00062	0.833	29993.3	44854.2	29842.9	34196	43562.3	38415.5	58806.9	119498	143295	57224.3	50944.3	43593.5	103253	162207	108713	149403	122355	5692.68	8631.89	9970.47	8868.97	13788.1	9327.14	50549.1	51158.7	74585.9	51048.7
POS_414	0.631	130.049	DL-Pyroglutamic acid	[M+H]+	C5H7NO3	Organic acids and derivatives	Carboxylic acids and derivatives	C02237	0.858	1.3896e+06	1.49405e+06	2.40092e+06	1.2398e+06	1.52257e+06	1.24283e+06	1.32458e+06	736190	1.06732e+06	710684	1.37952e+06	1.11155e+06	566352	1.3383e+06	1.49606e+06	1.10527e+06	1.74294e+06	1.45839e+06	1.62435e+06	1.46169e+06	766740	1.25364e+06	1.55333e+06	1.18073e+06	1.17888e+06	1.32758e+06	881398
NEG_280	0.635	115.005	Maleic acid	[M-H]-	C4H4O4	Organic acids and derivatives	Carboxylic acids and derivatives	C01384	0.861	416356	890604	699997	876968	737982	629611	1.77556e+06	1.66224e+06	1.9962e+06	821942	1.33011e+06	1.12134e+06	510752	444144	320519	507071	458088	301726	368400	295367	383698	640274	414799	631888	719102	957681	639529
NEG_2491	0.637	258.997	alpha-D-Mannose 1-phosphate	[M-H]-	C6H13O9P	Organic oxygen compounds	Organooxygen compounds	C00636	0.842	35709.1	35098.8	37568.7	43727.7	41536.4	45961	15128.2	18394.5	23733.3	14351.7	14048.1	15857.8	45122.4	47351.5	39586	40167.2	36845.4	42117.5	39045.8	42619.5	55042.6	51815.5	38870.4	31379.9	28471.7	41128.2	29922
POS_6661	0.642	455.113	[3-Hydroxy-1-(4-methoxy-7-oxofuro[3,2-g]chromen-9-yl)oxy-3-methylbutan-2-yl] (E)-2-methylbut-2-enoate	[M+K]+	C22H24O8	Phenylpropanoids and polyketides	Coumarins and derivatives		0.774	40693.2	37964	80487.4	51563.3	48914.5	34827.8	43857.9	52013.7	42788.1	30503.3	74993.4	37776.1	33823.5	27017.2	44430.6	27267.8	44055.6	126618	136021	127732	143753	89717.4	125496	46066.6	43483.5	61978.7	44024.9
POS_664	0.646	147.075	Glutamine Analogue, 1	[M+H]+	C5H10N2O3	Organic acids and derivatives	Carboxylic acids and derivatives		0.925	768510	999355	1.51705e+06	451904	979474	711743	822466	377005	610798	465401	771823	601736	626109	795931	910991	506153	1.19462e+06	858400	1.07101e+06	843365	468631	881556	1.04029e+06	612868	656997	749940	507097
NEG_1098	0.649	179.059	9-Fluorenone	[M-H]-	C13H8O	Benzenoids	Fluorenes		0.902	9.10001e+06	7.17293e+06	1.25065e+07	1.16057e+07	8.48072e+06	9.73761e+06	1.00496e+07	8.49981e+06	1.43583e+07	5.60739e+06	9.67176e+06	7.77934e+06	1.45701e+07	9.5893e+06	1.13754e+07	8.1142e+06	1.2814e+07	1.4808e+07	1.2812e+07	1.01115e+07	1.62925e+07	9.27064e+06	1.27839e+07	7.9908e+06	6.9534e+06	1.22634e+07	6.63736e+06
NEG_122	0.651	89.0255	L-Lactic acid	[M+FA-H]-	C3H6O3	Organic acids and derivatives	Hydroxy acids and derivatives	C00186	0.704	657113	627640	789446	911599	810228	860718	650165	864126	1.0722e+06	698780	757725	627906	1.14985e+06	818135	761443	804714	724749	964992	921586	750502	1.23105e+06	839047	707065	735634	556370	782802	709797
NEG_573	0.655	149.045	D-Ribose	[M-H]-	C5H10O5	Organic oxygen compounds	Organooxygen compounds		0.758	233158	188243	327287	363542	223368	256023	133379	235609	391361	120334	268149	217530	389428	242829	316738	202885	349871	427040	388119	238142	435522	222707	290871	215086	184412	321952	166467
NEG_105	0.66	87.0084	Pyruvic acid	[M-H]-	C3H4O3	Organic acids and derivatives	Keto acids and derivatives	C00022	0.705	225535	195193	231726	269409	217650	261171	145880	163549	209097	139334	150586	132760	351854	230801	219947	215883	227058	330113	290280	277649	374349	295374	265220	215671	177062	239011	209229
POS_1211	0.662	180.086	D-Glucosamine	[M+H]+	C6H13NO5	Organic oxygen compounds	Organooxygen compounds	C00329	0.831	2.4559e+06	2.17866e+06	4.37618e+06	2.491e+06	2.34669e+06	2.05532e+06	2.58541e+06	3.40713e+06	2.44812e+06	3.24234e+06	3.17634e+06	2.42847e+06	4.00597e+06	3.1449e+06	3.60272e+06	3.04511e+06	3.9528e+06	4.77143e+06	4.59398e+06	4.87796e+06	4.84596e+06	3.49717e+06	4.40347e+06	2.87699e+06	2.80324e+06	3.19233e+06	2.67576e+06
POS_6	0.662	69.0332	Furan	[M+H]+	C4H4O				0.756	364980	347261	623368	373549	359051	314527	424554	477625	390503	490321	506339	379227	614288	485710	536172	477677	580321	689941	697223	697385	738822	555432	675811	441578	427139	465678	417091
POS_176	0.663	99.0442	alpha-Methylene-gamma-butyrolactone	[M+H]+	C5H6O2	Organoheterocyclic compounds	Lactones		0.719	123389	118310	218130	125143	122091	108287	141747	159207	127121	161363	166752	124760	199488	162212	184913	162019	200261	227624	235898	236960	243922	192586	227092	149346	147520	159563	143255
POS_401	0.665	127.038	4-Hydroxy-6-methyl-2-pyrone	[M+H]+	C6H6O3	Organoheterocyclic compounds	Pyrans		0.715	757963	681809	1.32251e+06	759739	729539	626065	926122	1.18247e+06	869723	1.18097e+06	1.12417e+06	853240	1.27437e+06	1.00876e+06	1.1685e+06	1.00607e+06	1.28519e+06	1.43001e+06	1.51141e+06	1.47692e+06	1.50316e+06	1.11024e+06	1.37043e+06	925055	890715	1.02432e+06	870956
NEG_4756	0.665	353.071	6:3+6O Fatty acyl hexoside	[M-H]-	C12H18O12	Lipids and lipid-like molecules	Fatty Acyls		0.769	101481	94576.3	126176	143127	106092	116370	8615.83	12760.6	5844.81	8792.83	8347.11	12070.2	100730	66264.9	62898.5	55127.8	60563.3	154409	130076	124413	196824	124923	106640	87941.1	68076.2	93786	85362.1
POS_228	0.668	104.108	Choline	[M]+	C5H14NO	Organic nitrogen compounds	Organonitrogen compounds	C00114	0.882	4.40647e+06	4.51347e+06	7.85855e+06	4.72297e+06	4.66482e+06	3.76977e+06	4.90627e+06	5.9433e+06	4.34977e+06	5.90918e+06	5.34299e+06	4.15641e+06	5.82271e+06	4.03807e+06	2.00384e+06	1.817e+06	5.60875e+06	2.59926e+06	2.81586e+06	2.96032e+06	2.85837e+06	2.38786e+06	2.61533e+06	3.83619e+06	3.77649e+06	4.26457e+06	3.7475e+06
POS_1	0.672	60.0808	Trimethylamine	[M-C6H8O6+H]+	C3H9N	Organic nitrogen compounds	Organonitrogen compounds	C00565	0.773	201596	206379	339892	216621	211778	181263	214460	255891	192786	257281	238792	190146	249431	178808	91582.2	137104	244899	122662	56519.9	136789	127444	108615	122528	173878	171517	186337	165982
POS_4512	0.673	360.15	Palatinose	[M+NH4]+	C12H22O11	Organic oxygen compounds	Organooxygen compounds		0.922	975849	848278	1.96514e+06	898427	984960	774258	5.5613e+06	7.99504e+06	5.09497e+06	8.17342e+06	6.88894e+06	5.40318e+06	4.40388e+06	3.48403e+06	3.92203e+06	3.22751e+06	4.69844e+06	3.9907e+06	3.82515e+06	4.17075e+06	3.93641e+06	2.90535e+06	3.71401e+06	3.22911e+06	3.1496e+06	3.72534e+06	3.04343e+06
POS_3298	0.675	307.1	5,7-Dimethoxyflavanone	[M+Na]+	C17H16O4	Phenylpropanoids and polyketides	Flavonoids		0.717	59372.2	51969.4	126706	58503.3	60603.4	42376.2	361847	544034	346500	572927	477565	375703	288720	220938	240617	199442	297381	249208	279911	291347	247397	177819	236935	212174	205532	247397	199320
NEG_554	0.679	147.029	(S)-2-Hydroxy-2-methylsuccinic acid	[M-H]-	C5H8O5	Lipids and lipid-like molecules	Fatty Acyls	C00815	0.761	297950	279956	383386	442832	356434	357693	288098	335275	411252	336619	357284	276085	425364	272579	90302.4	245563	94723.2	322887	149196	300099	418478	337830	231587	248322	190315	247593	247529
NEG_3995	0.679	323.033	URIDINE-5-MONOPHOSPHATE	[M-H]-	C9H13N2O9P				0.971	74319.1	66561.5	106364	88892	70860.2	83315.4	227354	217930	372570	234384	249945	218929	146386	81279.8	96762.8	68180.2	97096.8	110709	94545	84278.2	117483	81260.2	81696.4	88380.8	73190.3	97374.2	86059.9
NEG_5563	0.68	387.118	Lactose	[M-H]-	C12H22O11				0.747	3.89212e+06	3.56754e+06	5.38269e+06	5.28875e+06	4.31909e+06	4.89594e+06	3.06547e+07	3.68476e+07	5.94761e+07	2.87043e+07	4.01222e+07	3.62072e+07	2.98951e+07	1.82339e+07	1.63641e+07	1.45893e+07	1.52376e+07	1.60806e+07	1.29792e+07	1.2697e+07	1.72952e+07	1.2883e+07	1.24376e+07	1.36776e+07	1.04493e+07	1.36704e+07	1.33095e+07
NEG_4520	0.681	341.112	Trehalose	[M-H]-	C12H22O11	Organic oxygen compounds	Organooxygen compounds	C01083	0.979	5.10251e+06	4.52595e+06	7.18291e+06	6.79221e+06	5.55642e+06	5.72219e+06	3.61143e+07	4.20221e+07	6.97087e+07	3.94609e+07	4.74479e+07	3.81872e+07	3.35877e+07	2.16492e+07	1.9495e+07	1.70612e+07	1.79641e+07	1.81506e+07	1.68579e+07	1.59154e+07	2.10812e+07	1.37945e+07	1.52182e+07	1.69848e+07	1.24189e+07	1.69911e+07	1.64786e+07
NEG_4645	0.682	346.053	Adenosine monophosphate	[M-H]-	C10H14N5O7P	Nucleosides, nucleotides, and analogues	Purine nucleotides	C00020	0.938	9304.57	8848.72	10397	10349.5	9739.55	8580.74	7922.48	4673.16	1331.26	6824.85	6056.76	5948.31	8345.88	9024.53	11493.9	11640.4	8470.95	8398.78	10500.9	11768.6	8951.65	9250.2	7677.4	69463.5	47834.5	67925	69462.7
NEG_276	0.682	114.056	Proline	[M-H]-	C5H9NO2	Organic acids and derivatives	Carboxylic acids and derivatives	C00148	0.801	55480.2	50417.9	79256	75764.6	59082.3	66189.4	62677.1	70163.9	84774	63639.2	69136.5	63225.4	128616	87536.7	86515.5	70184.5	87912.6	92791.7	74174.8	67844.6	98501.2	72855.2	61988.4	59429.6	45779.5	59834.9	57916.4
POS_4087	0.684	343.143	beta-Lactose	[M+H]+	C12H22O11	Organic oxygen compounds	Organooxygen compounds	C01970	0.733	21885.8	28025.4	84785.5	26937.4	26331.7	28250.7	126111	200287	123506	111032	158543	73485.7	141427	110132	47391.1	81036.3	106867	134722	144729	136981	94071.9	74256.6	96238.7	59437.2	102119	59134.3	65403.1
NEG_8643	0.686	503.164	Melezitose	[M-H]-	C18H32O16	Organic oxygen compounds	Organooxygen compounds	C08243	0.956	374237	321488	552810	490357	373085	399741	2.33279e+06	2.25423e+06	3.75141e+06	2.47416e+06	2.6989e+06	2.04851e+06	1.55014e+06	861104	1.00766e+06	720310	966002	1.81053e+06	1.64032e+06	1.40045e+06	1.85406e+06	1.44217e+06	1.40734e+06	822811	639037	823496	802086
POS_646	0.687	146.081	4-Guanidinobutyric acid	[M+H]+	C5H11N3O2	Organic acids and derivatives	Carboxylic acids and derivatives	C01035	0.799	682303	651623	1.30103e+06	711086	710356	560778	324613	429875	303319	430385	392526	300766	520492	372541	207367	390853	497128	651639	877118	951949	930449	616232	812454	448491	441062	488280	420938
NEG_9829	0.688	549.172	Raffinose	[M-H]-	C18H32O16	Organic oxygen compounds	Organooxygen compounds	C00492	0.931	785435	649480	1.20226e+06	1.07005e+06	767540	846143	4.91484e+06	4.74279e+06	7.731e+06	5.22857e+06	5.81228e+06	4.3366e+06	3.42796e+06	1.81523e+06	2.20701e+06	1.48633e+06	2.18753e+06	4.74957e+06	4.05815e+06	3.26246e+06	4.56227e+06	3.2984e+06	3.57089e+06	1.75907e+06	1.36015e+06	1.8148e+06	1.71216e+06
POS_315	0.689	116.07	Pyrrolidin-1-ium-2-carboxylate	[M+H]+	C5H9NO2	Organic acids and derivatives	Carboxylic acids and derivatives		0.924	305121	367314	650128	383230	387147	256715	384226	498447	362638	498669	447639	348648	800719	568762	720853	618794	760820	646821	694046	740551	776304	541348	640171	453847	444161	492098	423725
POS_598	0.689	138.054	Trigonelline	[M+H]+	C7H7NO2	Alkaloids and derivatives		C01004	0.932	971796	954957	1.65824e+06	1.02789e+06	1.01935e+06	826507	205264	766335	518174	735098	477058	162108	1.66103e+06	1.17857e+06	1.09763e+06	1.24234e+06	1.4959e+06	1.42724e+06	1.35145e+06	1.65814e+06	1.65814e+06	1.1714e+06	1.37161e+06	918423	902188	1.00077e+06	885050
POS_1313	0.69	189.132	Tilarginine	[M+H]+	C7H16N4O2	Organic acids and derivatives	Carboxylic acids and derivatives	C03884	0.95	240961	231629	432081	257704	251538	212626	191911	363105	120559	321811	268091	209708	591074	333668	398547	458110	544824	128885	134621	157144	140597	93071.7	107061	258866	254473	279313	241643
NEG_6498	0.691	426.025	Adenosine-3'-5'-diphosphate	[M-H]-	C10H15N5O10P2	Nucleosides, nucleotides, and analogues	Purine nucleotides	C00054	0.955	58686.7	49758.7	92104.3	86578.6	57457.3	67931.9	45037.3	45920.4	55451	45280.3	50293.2	39318.9	151804	86147.5	100270	71583.7	91283.5	126527	111704	90083.3	129928	94404.6	93156.8	45290.7	35390.4	45306.4	44114.9
POS_1504	0.692	203.149	N,N-Dimethylarginine	[M+H]+	C8H18N4O2	Organic acids and derivatives	Carboxylic acids and derivatives	C03626	0.946	93582.1	59939.2	266016	119881	91834.1	40149	110261	368219	131469	356834	121674	83706.4	242515	136869	209133	148896	200938	63246.7	103116	89427.2	77754.8	33193.8	61756.7	114473	87289.5	109202	87103.6
NEG_375	0.692	128.035	L-Pyroglutamic acid	[M-H]-	C5H7NO3	Organic acids and derivatives	Carboxylic acids and derivatives	C01879	0.845	559733	460327	736272	719674	542009	603234	331167	407112	486305	341933	402690	396694	890388	532743	594266	406112	489055	497471	404956	319040	484899	330550	317809	378474	324038	356408	349474
POS_2462	0.694	258.108	2-(((R)-2,3-Dihydroxypropyl)phosphoryloxy)-N,N,N-trimethylethanaminium	[M]+	[C8H21NO6P]+	Lipids and lipid-like molecules	Glycerophospholipids		0.871	29957.7	34746.7	57031	35118.6	31186.9	15389.1	11212.9	25655.7	10621.7	27855.8	67538.1	7355.1	71312.4	52815.6	56820.9	53637.9	64988.8	130772	145331	140597	121376	116468	137296	44000.2	44848.8	45434.9	40143.8
POS_4238	0.706	351.068	2',5,6-Trimethoxyflavone	[M+K]+	C18H16O5	Phenylpropanoids and polyketides	Flavonoids		0.788	389797	423704	625651	450925	435165	360849	98283.1	259481	60258	225013	130778	128687	211553	140968	195754	179618	136507	192821	228750	247033	283275	105882	182443	175629	97145.2	184010	166512
POS_1034	0.706	170.092	N3-Methyl-L-histidine	[M+Li]+	C7H11N3O2	Organic acids and derivatives	Carboxylic acids and derivatives		0.757	24035.2	26491.2	36670.5	30154.2	28417.9	20386.4	17449.9	21487.6	15087.4	20822.2	19274.7	15127.2	58502.9	43497.3	54905.9	49088.4	55902.2	29298.5	33026.6	33797.2	35251.7	36255.9	29514.3	29828.1	29246.8	34355	29247.5
NEG_998	0.709	173.008	cis-Aconitic acid	[M-H]-	C6H6O6	Organic acids and derivatives	Carboxylic acids and derivatives	C00417	0.896	2.14415e+06	1.93496e+06	3.00677e+06	3.22567e+06	2.3807e+06	2.49148e+06	803280	809996	1.15965e+06	888300	946228	742873	5.11334e+06	2.8765e+06	3.15112e+06	2.49029e+06	2.5251e+06	2.61654e+06	1.2188e+06	2.04762e+06	2.86161e+06	2.30723e+06	1.95039e+06	1.64366e+06	1.2622e+06	1.64088e+06	1.59313e+06
NEG_99	0.716	85.0292	2-Butyne-1,4-diol	[M-H]-	C4H6O2	Organic oxygen compounds	Organooxygen compounds		0.799	831912	747754	1.18175e+06	1.25817e+06	924283	952577	368076	388061	510846	408947	438823	366831	2.06303e+06	1.11804e+06	1.24422e+06	982841	1.01815e+06	890485	408250	691340	965778	777277	659109	627083	479564	625745	609058
POS_4982	0.718	379.118	(E)-1,4-Bis(4-hydroxy-3-methoxyphenyl)-2,3-dimethylbut-2-ene-1,4-dione	[M+Na]+	C20H20O6	Lignans, neolignans and related compounds			0.796	552.902	698.228	518.267	488.765	431.799	510.315	336.532	255.337	468.358	489.29	3990.68	467.928	3258.3	3061.77	2255.88	2950.2	2642.88	31152.7	28343	33789.5	36991.4	34489.2	27880.2	8843.4	10312.8	10100	10313.2
NEG_1222	0.72	188.057	N-Acetyl-L-glutamic acid	[M-H]-	C7H11NO5	Organic acids and derivatives	Carboxylic acids and derivatives	C00624	0.721	35259.6	34034	43910.7	50854.6	42113.3	31422.8	33995.9	41758.3	39400.3	34322.2	40838.9	34729.6	82429	41219	56957.7	54020.8	50518.9	43903	36581.9	36455.4	49937	41009.9	31771.7	31882.4	26925	33037.3	33022.1
POS_1252	0.729	184.074	Phosphocholine	[M]+	[C5H15NO4P]+	Organic nitrogen compounds	Organonitrogen compounds	C00588	0.914	84782.9	68824.8	121855	84868.5	70630.8	59437.6	62682.7	76477.8	65775.1	86557	80590.4	63029.4	162634	37132.8	144111	117928	141820	18400.1	46700.1	58114.2	54393.6	33466.4	45615.9	70373.9	33630.1	67317.9	62785.4
POS_344	0.736	118.084	Valine	[M+H]+	C5H11NO2				0.903	114151	146397	205029	141513	144208	103797	121866	168204	97823.6	177213	128781	95811.3	196229	110027	207510	162074	222162	120702	130170	145489	181307	109438	122656	109767	107398	124707	104301
NEG_555	0.739	147.031	(-)-Citramalic acid	[M-H]-	C5H8O5				0.772	293486	277047	383122	432377	352860	355122	290139	334766	397572	347201	353638	270185	423171	272319	150620	244429	106671	318602	128202	297609	414667	336945	233864	249482	189348	251473	245747
POS_8297	0.742	527.156	Maltotriose	[M+Na]+	C18H32O16	Organic oxygen compounds	Organooxygen compounds		0.869	100195	245733	301664	138788	226584	104862	2.09036e+06	1.23856e+06	1.03801e+06	2.40169e+06	734438	592713	333799	206636	442803	339700	522422	907284	1.10557e+06	1.07028e+06	1.21004e+06	1.23042e+06	1.02416e+06	839177	1.06322e+06	904787	834900
NEG_2523	0.748	260.026	O(4)-Phosphotyrosine	[M-H]-	C9H12NO6P	Organic acids and derivatives	Carboxylic acids and derivatives		0.715	32668.5	22412.3	42523.7	51363.5	27703.1	18961.1	28514.3	24250.7	29097.8	30006.1	30835.3	29750.2	48931.2	21292.7	40049.6	13150.3	28206.2	46080.5	41938.8	20670.6	27747.2	20353.4	15749	20623.6	19232.4	20090.2	21238.3
POS_615	0.76	142.122	Tropine	[M+H]+		Alkaloids and derivatives	Tropane alkaloids	C06173	0.742	689634	847013	1.10447e+06	721974	762887	646411	370957	487869	309958	506852	364858	279292	641866	392005	720991	574285	721189	102415	109009	117425	124003	103832	105694	335770	341521	364913	335727
POS_5415	0.769	399.141	S-Adenosylmethionine	[M+H]+	C15H22N6O5S	Nucleosides, nucleotides, and analogues	5'-deoxyribonucleosides		0.96	97786.6	98270	138112	89730.6	91634	83513	107712	106304	85858.2	114536	90219.5	72964.7	378097	289751	444573	335593	482722	347447	211591	360953	402820	314391	374437	152794	154708	162790	144922
POS_1484	0.77	203.052	Fructose (Generic Ketohexose)	[M+Na]+	C6H12O6	Organic oxygen compounds	Organooxygen compounds		0.793	907534	1.19662e+06	1.44775e+06	1.10843e+06	1.11791e+06	899116	712805	1.20335e+06	643423	1.06005e+06	831335	560568	1.26426e+06	756554	1.16957e+06	1.07106e+06	1.18751e+06	1.14305e+06	1.09456e+06	1.34036e+06	1.72513e+06	1.18937e+06	1.03495e+06	1.02989e+06	1.01123e+06	1.10723e+06	949730
NEG_439	0.77	133.055	Thyminose	[M-H]-	C5H10O4	Organic oxygen compounds	Organooxygen compounds		0.701	76914	76707.2	95083.3	102152	105957	104212	55080.5	58247.3	60733.6	56821.3	58094.8	37433.1	182545	45861.6	113268	41113	95518.7	21409.1	14362.7	34522.9	41264.8	34225.2	23204.1	48431.9	44221.6	53002.1	50899.8
POS_3544	0.776	321.112	Corylin	[M+H]+	C20H16O4	Phenylpropanoids and polyketides	Isoflavonoids		0.84	31849.3	41037.5	36084.3	30149.9	28380.6	39958.4	26560.3	36683.8	27618.3	34458.6	32530.6	20626.3	24671.9	18822.9	16753.2	21997.5	20213	19645.1	19268.3	25516.6	23080.8	20165.8	19733	20743.2	17662.8	23739	19929.2
POS_265	0.777	111.055	N-Acetylimidazole	[M+H]+	C5H6N2O	Organoheterocyclic compounds	Azoles		0.703	33895.1	42520.9	40935.9	35041.3	40684.7	33098	19157.2	17481.1	19749.3	22026.7	17585.9	16225.4	21851.8	17566.5	20043.9	20705.2	19187.5	8859.93	8002.28	7736.2	9004.3	12485.8	9248.83	15246.4	15271.7	16782.4	15288.1
NEG_1997	0.793	233.156	(E)-5-((1R,3R,6S)-2,3-Dimethyltricyclo[2.2.1.02,6]heptan-3-yl)-2-methylpent-2-enoic acid	[M-H]-	C15H22O2	Lipids and lipid-like molecules	Prenol lipids		0.798	86993.5	82944	104085	128981	112413	112162	38045	43438.2	49650.9	42334.7	53402.6	32452.8	118148	54958.3	53564.8	95191	39520.8	34232.3	73372.3	59035.3	93706.8	94780.2	46573	48592.7	18763.3	53237.7	52936.3
POS_2505	0.795	261.06	7-Hydroxyflavone	[M+Na]+	C15H10O3	Phenylpropanoids and polyketides	Flavonoids	C11264	0.763	119415	282635	102546	96214.3	120922	333630	61460.1	147909	120580	150294	157700	43914.2	156967	276612	145591	208273	175423	286629	69121.8	320453	306312	358509	113137	221055	307932	213682	255410
POS_2253	0.797	244.092	Cytidine	[M+H]+	C9H13N3O5	Nucleosides, nucleotides, and analogues	Pyrimidine nucleosides		0.718	5132.68	11381.9	10588.9	9255.62	13882.9	3473.57	6222.51	5475.02	5867.9	6541.59	6149.07	6265.83	21091.2	15440.9	26204.6	19167.4	26270.7	18029.5	13927.3	17652.4	19530.4	12843.8	17531.7	10431.3	10403.1	10849.6	9837.54
NEG_378	0.798	128.072	Pipecolic acid	[M-H]-	C6H11NO2	Organic acids and derivatives	Carboxylic acids and derivatives	C00408	0.857	24216.1	20624.9	29530.8	32743.4	28488.8	28162.9	26426	30767	25813.9	26616.4	29427.3	25490.2	25899.4	21445.6	22840.4	21471.2	20046	29057.9	32188.1	26796.8	34568.2	31260.8	25003	11294	10141.1	11791.8	11782
POS_1458	0.808	200.127	Methylecgonine	[M+H]+	C10H17NO3	Alkaloids and derivatives	Tropane alkaloids		0.723	18467.7	20366.4	21946.1	18506.7	17695.7	18646.2	9875.93	8744.99	8974.65	10132.4	8760.07	7767.92	77795	60408	99515	76250.5	99707.4	21854.6	19404.3	19147.3	21174.3	19950.9	21307.3	18828.8	20058.5	19430	19242.2
POS_5245	0.811	393.077	Fraxin	[M+H]+	C16H18O10				0.71	18036.1	19006.5	18940.2	15828.2	15164.8	19008.6	15093.3	11013	14584.2	13490.4	13362.1	11881.4	35298.1	27861.1	34087.5	33388.6	38371	24888.7	22493.6	22710.3	30035.2	24417	25045.8	18458.1	18462.8	18978.5	18664.6
NEG_435	0.813	133.016	L-Malic acid	[M-H]-	C4H6O5	Organic acids and derivatives	Hydroxy acids and derivatives	C00149	0.867	1.11023e+06	648331	820527	328994	1.18846e+06	1.08427e+06	990372	1.15051e+06	1.04895e+06	1.0836e+06	1.19943e+06	1.47148e+06	882385	882494	807774	743423	278913	711547	1.72348e+06	1.54539e+06	1.93079e+06	1.7734e+06	1.55255e+06	172220	164555	177976	177899
NEG_4264	0.815	331.064	Gallic acid hexoside	[M-H]-	C13H16O10	Phenylpropanoids and polyketides	Tannins		0.788	6589.26	1800.04	5081.38	6978.37	4873.29	2251.86	258.211	1021.92	609.781	681.57	667.961	827.967	4534.91	3908.66	5053.76	3646.51	3565.85	4686.23	6953.15	5044.53	4758.69	4410.32	4981.05	54832.9	52410.5	56464	56408.8
POS_577	0.817	136.075	2-Phenylacetamide	[M+H]+	C8H9NO	Benzenoids	Benzene and substituted derivatives	C02505	0.833	329910	342664	316863	277557	296171	326034	352898	367881	337111	336408	362133	269665	485297	537891	513168	475979	547808	241158	208583	219758	265179	243326	235208	255484	284212	284103	278362
NEG_315	0.818	117.021	Succinic acid	[M-H]-	C4H6O4	Organic acids and derivatives	Carboxylic acids and derivatives		0.906	1.00903e+06	721512	938006	1.25727e+06	1.02567e+06	1.10705e+06	729522	913755	657751	815121	1.01026e+06	872144	1.46184e+06	1.03975e+06	1.07986e+06	937857	796845	406272	425473	432397	523503	426768	346086	504196	429815	522523	520405
POS_280	0.819	112.086	Histamine	[M+H]+	C5H9N3	Organic nitrogen compounds	Organonitrogen compounds	C00388	0.738	41280.5	46024.5	39228.3	34874.3	39421.2	40589.7	49367.9	52761.6	49083.2	47456.2	48825.1	40300.3	57119.3	54722.3	59487	61389.9	62648.5	3893.56	4396.31	4635.95	4670.27	4236.73	4246.46	29654.3	30518	31106.9	30445.7
NEG_12128	0.822	662.108	[[(2R,3S,4R,5R)-5-(6-Amino-7H-purin-9-ium-9-yl)-3,4-dihydroxyoxolan-2-yl]methoxy-oxidophosphoryl] [(2R,3S,4R,5R)-5-(3-carbamoylpyridin-1-ium-1-yl)-3,4-dihydroxyoxolan-2-yl]methyl phosphate	[M-H]-	C21H27N7O14P2	Nucleosides, nucleotides, and analogues	(5'->5')-dinucleotides		0.885	34394.4	13909.9	40107.5	24704.1	20097.6	23543.7	8730.18	6765.56	10069.7	10837.1	8977.84	12627.5	25786.2	25127.5	37057	16371.9	565.394	48840.2	55700.5	35965	38469.4	27569	47283.3	6379.77	6071.62	5353.31	6303.24
POS_3543	0.824	321.096	N(4)-Acetylsulfamethazine	[M+H]+	C14H16N4O3S	Benzenoids	Benzene and substituted derivatives		0.789	29035.3	28023.1	25883.4	24965.1	26044.3	26014.2	17583.3	20314.6	15337.3	19110	15816.3	15878.6	24171.2	24096.2	16604.3	23645.4	17860.6	17646	15992.4	18231.7	21921.8	17362.5	17967.9	18797.8	18816.4	19796	18937.8
POS_3778	0.824	332.133	Pyridoxine + O-Hex	[M+H]+	C14H21NO8	Organoheterocyclic compounds	Pyridines and derivatives		0.716	17321	5158.55	13940	11272.3	5336.21	8146.2	16305.1	10220.1	21345.6	20974.1	20877.9	18595.7	24044.6	17342.4	5772.44	15466.8	3893.75	20846.2	17545.2	18807.2	15968.8	5721.53	16709.3	31694.6	15704	22516	15496
POS_5930	0.825	423.089	5-Chloro-3-[(E)-3,4-dihydroxy-3,5-dimethylhept-1-enyl]-7,8-dihydroxy-7-methyl-8H-isochromen-6-one	[M+K]+	C19H25ClO6	Organoheterocyclic compounds	Azaphilones		0.807	34444.4	44941	32055.8	39040.1	41949.6	43573.2	24795.2	51976.9	50071.1	24800.8	62355.6	52044.5	37444.8	29458.8	40159.9	36342.2	40308.8	60741.3	140728	183788	200851	149909	58479.6	61089.6	64108.4	64093.5	63307.3
POS_3267	0.829	305.118	8,8-Dimethyl-2-phenyl-4H,8H-benzo[1,2-b:3,4-b']dipyran-4-one	[M+H]+	C20H16O3	Phenylpropanoids and polyketides	Flavonoids		0.763	24571.6	27498	25105.9	21999.8	24043.8	27517.7	18161.9	19559.2	17846.1	18335.9	17573.4	14763.8	20971.2	23917.6	14378.5	22528.6	16271.6	18120.5	16468.8	19356.4	20301.6	18053.6	18577	18332.7	21394.8	20930.3	21187.7
POS_4303	0.83	353.082	N(4)-Acetylsulfadimethoxine	[M+H]+	C14H16N4O5S	Benzenoids	Benzene and substituted derivatives		0.753	15045.4	3137.99	10473.5	11725	5075.99	15411.3	12684.2	21226.4	8677.21	17067.6	4936.57	10018.5	9016.63	7588.58	14387.9	8061.11	3355.43	25037.9	24185.5	21651.1	27416.6	27689.5	26376	9197.98	9546.4	11231.5	9194.74
NEG_3851	0.836	315.07	Benzoic acid + 2O, O-Hex	[M-H]-	C13H16O9	Organic oxygen compounds	Organooxygen compounds		0.867	267618	160877	284119	287130	226969	231661	117126	121478	123431	127872	131288	122345	269293	191447	292011	187716	253673	137031	160009	129451	142413	130096	124998	217831	192194	217713	217459
NEG_566	0.836	148.043	Methionine	[M-H]-	C5H11NO2S	Organic acids and derivatives	Carboxylic acids and derivatives	C00073	0.861	166354	127808	145776	179419	170751	176201	204815	251770	239527	228398	279132	280923	64426.9	61468.2	58433.3	53911.1	44397.7	61831	71002	75224	78818.3	71704.1	63563.9	69546.7	61768.3	67945.7	70624.4
NEG_782	0.837	161.047	Meglutol	[M-H]-	C6H10O5	Lipids and lipid-like molecules	Fatty Acyls	C03761	0.913	539311	420927	463490	522786	515082	563139	386390	508780	435290	407857	503169	531495	758259	740626	657511	714550	614128	179259	663050	653948	714440	690279	622095	289305	260820	301132	300892
POS_375	0.838	123.053	Nicotinamide	[M+H]+	C6H6N2O	Organoheterocyclic compounds	Pyridines and derivatives	C00153	0.916	23538.2	23827.3	53874.6	19011.8	19062.1	21268.3	67966.5	20137.9	30234.1	39802.3	39986.9	60183.3	40329.5	48284.6	57085.2	86672.7	57036.4	57051.7	69784.5	88041.7	89438.2	103887	81106.1	30129.1	53408.3	14144.2	51361.1
POS_476	0.841	132.102	DL-Isoleucine	[M+H]+	C6H13NO2	Organic acids and derivatives	Carboxylic acids and derivatives	C16434	0.914	160818	118366	162968	116390	102997	125314	152538	110868	155021	145277	154355	122125	123441	119523	11403.3	109805	13111.1	97235.1	94046.3	99801.8	122025	80693.3	99647.3	180018	109453	132377	119068
NEG_4766	0.841	353.091	4-Caffeoylquinic acid;4-O-Caffeoylquinic acid	[M-H]-	C16H18O9	Organic oxygen compounds	Organooxygen compounds		0.708	26158.8	30015.8	21285.6	49450.2	36201.3	43024.7	7283.84	11707.3	12981.2	11863.4	13072.3	11704.3	8220.25	26179.7	16041.3	24478	4363.12	29686.7	34047.9	27594.9	32810.1	22966	35403	10926.4	9334.59	11493.8	10678.9
NEG_812	0.841	163.04	4-Hydroxycinnamic acid	[M-H]-	C9H8O3	Phenylpropanoids and polyketides	Cinnamic acids and derivatives	C00811	0.732	160844	65768.1	136864	154181	154949	69853.2	10820.4	54379.2	1464.09	55981.2	69886	69571.7	174585	162976	1463.94	160965	1196.12	79423.8	82029.1	44478.2	48727.6	88547.1	80673.1	46040.5	41169.8	47430.9	47389.3
NEG_1207	0.842	186.08	3-Hydroxy-N-(2-oxooxolan-3-yl)butanamide	[M-H]-	C8H13NO4	Organic acids and derivatives	Carboxylic acids and derivatives		0.831	21497	19256.5	18879.6	21856.4	22889.9	23926	14467.5	18839.1	15962.5	15045.1	17197.9	15718.2	25580.1	22920.2	21068.2	21568.3	18601	18027.2	20791.5	21932.4	23719.9	24565.9	18403	9942.22	9167.77	10463.9	10448.7
NEG_586	0.85	151.027	Xanthine	[M-H]-	C5H4N4O2	Organoheterocyclic compounds	Imidazopyrimidines	C00385	0.731	54.6791	68.4943	42.6394	151.296	29936.5	533.598	73.3448	5751.79	458.486	52.2943	7107.73	1271.93	38.7198	79.4875	61.1571	72.355	85.9053	90.7443	38.1025	53.0853	42.4463	6869.35	42.9215	10182.3	9853.15	10550.3	10540.7
NEG_395	0.88	130.087	l-Isoleucine	[M-H]-	C6H13NO2	Organic acids and derivatives	Carboxylic acids and derivatives	C00407	0.887	1841.71	2010.21	2079.4	2159.26	2528.85	1779.61	2520.77	2023.58	1715.45	2097.59	1838.87	1865.91	3072.78	3470.03	3740.21	3481.28	3926.06	1849.23	1498.6	706.437	1686.24	2003.51	2166.54	311270	291850	311024	149782
NEG_344	0.913	122.023	Hydron;pyridine-3-carboxylate	[M-H]-	C6H5NO2	Organoheterocyclic compounds	Pyridines and derivatives		0.804	13408.4	10817.1	10690.3	15124.9	6240.22	15228.9	12613.3	10271.5	15330.4	14635.7	11638.7	15293.2	14900.5	11015.2	10160.2	11469.2	11025.2	6465.34	7138.72	8633.56	9745.77	7431.26	7275.02	4588.54	971.256	4554.84	4529.34
POS_4193	0.926	348.126	Nitidine chloride	[M+H]+	C21H18NO4+.Cl-				0.825	203095	92525.4	105916	140972	52652	156076	26364.7	57543.5	96270.4	60570.2	81140.7	76464.2	70380.4	68370.7	195744	64490.1	173457	190034	193731	228952	292615	209443	463538	113311	109888	97416	113622
NEG_1113	0.932	180.068	Tyrosine	[M-H]-	C9H11NO3	Organic acids and derivatives	Carboxylic acids and derivatives	C00082	0.941	3.58571e+06	1.51059e+06	3.34431e+06	3.18451e+06	1.67996e+06	1.8442e+06	2.93437e+06	1.46455e+06	2.72808e+06	3.01772e+06	1.45737e+06	2.83733e+06	3.53451e+06	3.36849e+06	4.11365e+06	3.41309e+06	4.09976e+06	1.98212e+06	2.14442e+06	969880	902653	1.97031e+06	2.04784e+06	249330	273561	251322	276133
NEG_5297	0.942	377.095	4-Hydroxy-5-[(2S,3R,4S,5S,6R)-3,4,5-trihydroxy-6-(hydroxymethyl)oxan-2-yl]oxy-1H-benzo[f][2]benzofuran-3-one	[M-H]-	C18H18O9	Organic oxygen compounds	Organooxygen compounds		0.708	272157	688626	258257	156977	418361	307281	2.60622e+06	1.27541e+06	858360	1.21809e+06	919151	1.00139e+06	810623	1.1639e+06	1.12506e+06	1.65734e+06	3.11415e+06	833677	1.28625e+06	626041	613479	2.42146e+06	2.1076e+06	169491	307083	434134	171648
NEG_12127	0.957	662.101	Nicotinamide-Adenine-Dinucleotide	[M-H]-	[C21H28N7O14P2]+	Nucleosides, nucleotides, and analogues	(5'->5')-dinucleotides	C00003	0.875	17728.4	11115.2	23417.3	14565.7	11838.8	12543.3	8715.24	5401.98	7511.19	8080.88	7295.68	6197.47	18301.3	14068.2	38405.2	16377.6	68571.4	24616.9	27165.7	15548.2	17508.6	15984.6	31333.7	3024.55	3115.44	2279.66	3120.41
POS_578	0.958	136.076	p-Hydroxyphenylethanolamine	[M-H2O+H]+	C8H11NO2	Benzenoids	Phenols	C04227	0.79	85140.4	60772.4	95214.3	64271.9	59184.3	71364.9	100679	73165.4	63924.7	78286.4	57570.8	72321.8	120266	527218	166708	107836	174125	55138.8	59655.7	52314.5	38773.1	40956	65088	47878.4	51650.7	49257.6	50310.3
POS_4983	0.973	379.118	9-Methoxycamptothecin	[M+H]+	C21H18N2O5	Alkaloids and derivatives	Camptothecins		0.749	3262.09	5437.6	4883.69	4378.76	6924.65	5639.26	1640.18	359.358	1304.32	2966.21	1837.96	1601.39	2888.97	1449.91	2512.9	3476.51	3869.05	23473.6	29818.4	31005.6	18038.2	25970.2	26572.4	7711.08	7886.08	7211.35	8549.86
NEG_2178	1.035	243.063	Uridine	[M-H]-	C9H12N2O6	Nucleosides, nucleotides, and analogues	Pyrimidine nucleosides	C00299	0.765	193326	109085	173314	195429	186625	201774	602797	334582	344851	582192	346098	361944	481988	433552	438802	467335	431036	301109	316133	333183	318423	188103	302663	39785.3	40562.4	41801.5	41754.5
POS_483	1.101	132.102	L-Norleucine	[M+H]+	C6H13NO2	Organic acids and derivatives	Carboxylic acids and derivatives	C01933	0.895	695119	548907	1.10941e+06	687530	487775	330444	1.00191e+06	467580	632717	869165	637630	632307	745280	689010	1.02017e+06	688964	1.10284e+06	341350	358929	237275	183197	179783	380629	373175	350982	356132	352784
NEG_2682	1.154	271.082	Arbutin	[M-H]-	C12H16O7				0.858	4576.12	3997.35	4805.77	4195.01	3703.02	4406.44	4115.23	3618.75	3688.26	3299.8	3654.96	3693.15	10247.7	9819.22	11839.5	10396.2	11997.3	7905.59	6659.49	7134.08	7167.21	3614.83	7284.69	897.474	1097.08	594.544	1051.31
NEG_617	1.176	153.019	2,5-Dihydroxybenzoic acid	[M-H]-	C7H6O4	Benzenoids	Benzene and substituted derivatives	C00628	0.786	26203.9	17699.7	25133.6	22529.5	13481.2	17214.7	7103.35	6927.46	4315.17	3017.35	6602.03	7942.66	27130.5	14585.5	28623.1	30972.6	29352	16745.9	17375.1	16122.6	16928.3	11363.2	17326.6	2430.63	3345.05	2904.88	3717.35
NEG_522	1.217	144.105	(S)-3-Amino-5-methyl-hexanoic acid	[M-H]-	C7H15NO2	Organic acids and derivatives	Carboxylic acids and derivatives		0.839	8355.9	8803.07	8423.53	7978.66	7712.33	8128.7	10107.1	9958.04	10709.7	11359	10808.4	11269.7	5235.24	4827.59	5134.43	5402.46	5265.49	15508.8	15224.5	14995.9	14226	16261.9	15471.2	1224.87	1567.76	588.239	1468.05
POS_647	1.228	146.116	N-Methylisoleucine	[M+H]+	C7H15NO2	Organic acids and derivatives	Carboxylic acids and derivatives		0.807	28389.7	26346.7	37830.6	24448.5	25555.8	26979	41931.3	37268.6	46954.6	42493.4	41034.8	42787.1	41310.2	40758.3	46676	24235.1	48078.9	75439.1	76655.4	71853.6	63749.9	56792.6	81730	31948.9	30911.6	31751.1	31949.5
POS_2704	1.262	273.095	alpha-Naphthoflavone	[M+H]+	C19H12O2	Phenylpropanoids and polyketides	Flavonoids		0.846	239148	205941	227835	231987	212938	223839	125688	119473	116801	110161	124150	129586	97564	107542	5368.95	10725.8	3727.87	169728	171461	173118	181380	154048	185416	148422	148247	148252	155044
NEG_3467	1.288	299.077	Salicylic acid glucoside	[M-H]-	C13H16O8	Organic oxygen compounds	Organooxygen compounds		0.789	64711.4	74014.6	67066.4	69525.1	70161.2	68944.8	29965.5	33133	31769.8	29184.6	30363.4	29414.7	103035	97310.8	89940.1	102781	92580.2	24637.5	25945	27276.4	27792.9	28672.3	28721.5	9795.73	11429.4	10909.6	11407.4
NEG_4806	1.321	355.066	2,3,4-Trihydroxy-5-[3-(4-hydroxyphenyl)prop-2-enoyloxy]hexanedioic acid	[M-H]-	C15H16O10	Organic oxygen compounds	Organooxygen compounds		0.745	14208.8	18397.7	13162.2	15874.8	19357.5	15102.2	8761.93	16556.4	10235.2	9554.21	11601.7	8827.18	16803.4	17608.2	13356.1	18690.5	14759.9	9802.96	10317.9	12475.5	11978.8	15516	10245.9	1635.49	1844.35	1863.42	1861.88
POS_4718	1.353	369.115	(4-Hydroxy-3,5-dimethoxyphenyl)methyl-beta-D-glucopyranoside	[M+Na]+	C15H22O9	Organic oxygen compounds	Organooxygen compounds		0.807	110082	86037.2	117566	112659	88073	110309	56851.6	51127.6	54083.9	53039.2	48707.2	54408.4	262331	218014	332495	235600	329407	174330	183036	179682	164554	245892	193976	131544	133155	120112	136533
POS_802	1.377	154.05	3-Hydroxyanthranilic acid	[M+H]+	C7H7NO3	Benzenoids	Benzene and substituted derivatives	C00632	0.778	24785.6	8590.55	24198.1	20058.5	15847.1	15241.3	21812.5	21393.9	21052	21334.4	23347.3	22549.8	8628.55	10936.5	19392.9	13951	8975.64	5541.16	11787.5	8775.72	7709.87	5298.03	8426.51	8077.49	11726.9	3273.34	8902.77
POS_7280	1.386	485.126	beta-D-Fructofuranosyl 6-O-(4-hydroxybenzoyl)-alpha-D-glucopyranoside	[M+Na]+	C19H26O13	Organic oxygen compounds	Organooxygen compounds		0.783	14193.4	969.744	22121.2	7166.55	705.383	6385.94	19822	4205.19	7003.37	12987.9	910.326	5396.18	7031	7017.28	20944.1	8793.68	21829.4	9540.34	14277.7	3939.91	355.152	335.928	11968.5	1155.14	3403.98	1094.56	1789.3
NEG_2618	1.395	267.074	Inosine	[M-H]-	C10H12N4O5	Nucleosides, nucleotides, and analogues	Purine nucleosides		0.896	11250.6	8998.06	12595.5	9425.37	8525.09	9976.26	27627.8	20315.2	22721.8	23665.3	22569.7	23996	32505.8	30153.6	39498.7	29418.9	46636.8	57633.2	64240.7	51097.7	53510.7	48995.6	70380.3	5565.92	5702.94	6374.61	5524.14
NEG_412	1.409	131.034	Hydron;pentanedioate	[M-H]-	C5H8O4	Organic acids and derivatives	Carboxylic acids and derivatives		0.829	21115.8	13675.4	23064.4	18450.3	17004.2	18153.3	27324.7	19348.8	21206.8	31030.1	21269.6	25111	45665.2	48600.2	68263.7	46326.3	79286.9	33585.1	37863	29022.4	28518.8	24346.3	56626.9	4369.12	5735.78	4965.77	5116.65
POS_4584	1.449	363.128	alpha-Aminoorcein	[M+H]+	C21H18N2O4	Organoheterocyclic compounds	Benzoxazines		0.727	17266.2	9842.34	21592.3	12834.4	10146.7	11391.5	9281.15	2854.5	5062.4	6388.26	3289.4	14225.1	19169.6	5577.98	4210.26	24788.4	5788.21	30157.2	32654.1	24118.8	24792.6	19344.5	32535.1	12854.7	12870.8	11241.3	12411.4
NEG_2991	1.457	282.084	Guanosine	[M-H]-	C10H13N5O5	Nucleosides, nucleotides, and analogues	Purine nucleosides		0.935	16524.5	14307.5	18241.9	15420.3	14835.6	15187.7	33297.3	27430.5	28297.1	30846.2	28515.5	28152.3	58008.6	55903.6	66342.7	55302.2	73023.9	38493.9	40306.5	35987.7	34403.1	34360.8	43019.6	5568.4	6229.72	5833.01	5735.74
NEG_930	1.478	169.015	Gallic acid	[M-H]-	C7H6O5	Benzenoids	Benzene and substituted derivatives	C01424	0.745	36001.1	23982.9	34504.3	33326.4	23462.7	31752.7	18390.7	15525.5	17806.2	16662.8	17575.4	18065.8	12913.6	10984.5	13479.4	10497.6	15522.1	7114.91	7020.47	7060.95	6728.68	5318.07	8238.32	4190.91	3823.52	4355.65	4346.28
POS_5250	1.567	393.135	4-(1,3-Benzodioxol-5-ylmethyl)-3-[(3,4-dimethoxyphenyl)methyl]oxolan-2-one	[M+Na]+	C21H22O6	Lignans, neolignans and related compounds	Furanoid lignans		0.822	15818.4	12320.2	17988.3	14561.6	11975.8	15086.8	13556.4	9909.18	11311.9	12625.7	9415.87	11645.3	165554	299208	290419	141399	310361	186178	177833	196567	177392	137886	209996	51878.3	37675.1	51801.2	50153.8
POS_6221	1.579	435.147	6-O-Isobutyryl-alpha-D-glucopyranosyl alpha-D-glucopyranoside	[M+Na]+	C16H28O12	Organic oxygen compounds	Organooxygen compounds		0.881	39050.2	33238.9	40011.2	35105.5	31915.8	35795.7	5488.45	5328.61	6464.88	6188.01	5039.53	6097.24	49868.8	45676.5	56654.8	48297.7	64645	38146.5	32519.9	26860.9	28280.2	29563.2	38429.8	16776.5	23520.2	17118.5	17997.7
POS_5109	1.587	385.088	Methyl 2-hydroxy-6-(4-hydroxy-2-methoxy-6-methoxycarbonylphenoxy)-4-methylbenzoate	[M+Na]+	C18H18O8	Benzenoids	Benzene and substituted derivatives		0.719	18755.3	11283.9	18229	14872.6	13475.3	15733.9	15289	9364.3	11481.2	13708.3	9836.33	11697	41120	46382.2	69684	39492.9	64468.1	46064.9	45610.2	40998.1	37052.5	33065.5	47402.6	22241.7	23437.6	20230.4	21687.2
NEG_1169	1.62	182.047	4-Pyridoxic acid	[M-H]-	C8H9NO4	Organoheterocyclic compounds	Pyridines and derivatives	C00847	0.867	10969.1	9766.68	10976.5	9836.39	9431.91	9202.34	8547.63	7142.75	7786.68	9219.33	7709.89	8624.23	8389.67	8566.6	10006.6	9030.98	9517.48	13115.2	13690.4	12021.5	11595.1	11760.4	14138	2357.35	2543.72	2217.83	3173.14
NEG_518	1.621	144.044	4-Hydroxyquinoline	[M-H]-	C9H7NO	Organoheterocyclic compounds	Quinolines and derivatives		0.864	8565.9	7771.76	8679.84	8435.08	7212.79	8489.66	12064.5	10851.5	10985.9	11677.7	10974.1	11532.3	25702.1	24733.3	30079.5	24055.1	30193.4	7517.97	7259.19	6525.07	7172.88	6009.72	7630.03	2696.15	2695.4	2695.75	2936.45
NEG_1221	1.624	188.035	Kynurenic acid	[M-H]-	C10H7NO3	Organoheterocyclic compounds	Quinolines and derivatives	C01717	0.856	3725.39	3395.57	3837.27	3277.09	3351.93	3287.49	4675.59	4798.14	4743.67	4941.76	4562.37	4686.56	10829.4	10697.2	11943.7	10319.3	12362.3	3153.94	3181.58	2539.56	2409.88	2882.4	2976.64	851.659	1144.49	795.088	1059.44
POS_1576	1.627	208.06	2,3-Dihydro-3-hydroxy-2-oxo-1H-indole-3-acetic acid	[M+H]+	C10H9NO4	Organoheterocyclic compounds	Indoles and derivatives		0.878	28122.9	18310.2	33713.8	22637.6	19365.1	20225.8	49651.6	24933.1	40548.4	42338.3	32213.6	37043.1	114139	100035	254695	108582	270999	29838.7	31022.1	23943	16091	20196.6	35135.3	31189.2	31531	30447.4	30421.4
POS_641	1.628	146.058	2-Hydroxyquinoline	[M+H]+	C9H7NO	Organoheterocyclic compounds	Quinolines and derivatives		0.769	33474.9	32294.2	40983.3	30791.4	30522.6	31802.1	54620	36665.9	44172.1	49257.8	38396.7	39691.3	154706	138351	276894	155349	316144	34898.1	35638.8	28532.1	24957.5	27664.5	38028.8	38786.9	39876.2	42795.6	38781.7
NEG_3039	1.634	283.068	Xanthosine	[M-H]-	C10H12N4O6	Nucleosides, nucleotides, and analogues	Purine nucleosides	C01762	0.934	17988.1	13757.1	18946	16568.9	13418.1	15053.1	35103.5	27691.5	31820.5	36101.7	31653.4	30967.6	61885.7	53728.6	72518.1	53976	81140.2	30007.3	33072.7	27995.8	25553.1	22057.1	33435.8	3142.7	3248.68	2901.59	3652.92
NEG_907	1.694	167.035	Vanillic acid	[M-H]-	C8H8O4	Benzenoids	Benzene and substituted derivatives	C06672	0.714	5333.3	5085.64	3466.68	5080.89	5096.73	5424.83	4037.62	7038.28	6175.21	7722.64	7140.42	6428.92	13897.6	12251.2	14911.8	13759.7	10050.6	15092.1	7979.28	12409.5	12768.3	13776	9135.63	2734.76	2551.49	3251.59	1437.33
NEG_4174	1.718	328.04	Adenosine 2',3'-cyclic phosphate	[M-H]-	C10H12N5O6P	Nucleosides, nucleotides, and analogues	Purine nucleotides		0.751	3846.95	3008.2	4874.49	3532.48	2653.92	2676.93	6433.68	4172.75	5133.81	6886.94	4911.82	5118.62	9848.24	9160.87	15093.2	9533.07	16037.7	2770.61	2371.4	1895.67	1800.54	1645.48	2660.7	894.551	1022.57	432.952	961.058
NEG_620	1.735	153.021	2,3-Dihydroxybenzoic acid	[M-H]-	C7H6O4	Benzenoids	Benzene and substituted derivatives	C00196	0.915	360607	283499	385875	355706	280674	321213	4077	5792.18	4432.68	3968.55	5148.58	5747.42	218960	181144	238228	183449	267109	54258.3	57587.4	54107.1	52976.9	46528.1	65597	69482.4	69484.7	69510.1	71839.4
NEG_195	1.735	109.03	Catechol	[M-H]-	C6H6O2	Benzenoids	Phenols	C15571	0.901	229268	185525	248260	224815	183888	206064	2276.71	2327.02	1754.77	1987.32	1522.93	2346.78	142579	115650	153591	121570	169043	36608.6	37763.6	33156.3	33057.5	30502.4	39423.3	42138.2	43242	42448.6	46013
POS_894	1.741	160.074	6-methoxyquinoline	[M+H]+	C10H9NO				0.72	119054	51674	134003	115807	105059	112747	14500.7	12472.4	13377.1	7480.99	7401.33	7831.18	230405	227213	266124	217681	275937	38433.9	37123.2	31949.4	32564.7	28425.5	38000.5	73682.3	70307.8	70307.4	70905
POS_1181	1.753	177.103	Serotonin	[M+H]+	C10H12N2O	Organoheterocyclic compounds	Indoles and derivatives	C00780	0.919	9797.47	10984	10825.3	16952.3	12574.1	14796.1	1148.72	1937.48	1257.42	827.659	975.214	1964.94	30061.6	29399.4	44906.7	26350.2	46061.2	5014.52	4129.56	3349.04	4896.46	2310.59	5489.46	10911	10706.9	9992.87	10420.6
POS_4308	1.799	353.123	Bartsioside	[M+Na]+	C15H22O8	Lipids and lipid-like molecules	Prenol lipids		0.843	25192.8	19856.6	25615.1	27270.3	22908.8	24857.2	15544	11625.1	15799.5	10362.1	10806.4	9987.23	68730.3	61927.5	64454.1	64472	65311.5	42994.3	43510	41450.9	36436.8	37683.2	53450.3	25418.6	24269.9	26773.9	25069.6
POS_3521	1.806	319.076	Fenofibric acid	[M+H]+	C17H15ClO4	Benzenoids	Benzene and substituted derivatives		0.725	12039.7	13093	16531.1	16789.5	11732.6	13011.2	11499.9	11544.9	7757.05	6679.61	8876.29	7541.67	10302.6	9749.64	8576.08	9459.52	10009.8	7260.71	7484.66	8698.27	5533.18	4698.46	8376.34	7992.05	7608.7	10259.7	7619.63
POS_3456	1.822	315.107	Pyraclonil	[M+H]+	C15H15ClN6	Organic nitrogen compounds	Organonitrogen compounds		0.774	16990.2	17235.4	27891	15816.5	18757.7	20547.4	11683.4	14592	9163.63	10068.4	12740	8740.52	28066.5	27968.2	14246.6	14196.7	22495.8	20488.9	21960.6	16970.3	14621.7	14421.2	22984.6	16567.3	19489	16575.3	16963.8
POS_1609	1.87	210.05	Dimethirimol	[M+H]+	C11H19N3O				0.715	109409	113654	105633	117891	109526	115299	142405	148210	146796	128824	152775	136513	75360.5	73809.2	76327.1	73040.7	73039.5	38914.5	40748.4	41571.7	38459.6	38626.8	39562.2	90650.3	89042.7	89747.9	91715
POS_1295	1.872	188.069	Deethylatrazine	[M+H]+	C6H10ClN5	Organoheterocyclic compounds	Triazines	C06559	0.747	525736	454650	580300	510028	453432	500451	550325	447555	463991	450864	477548	457198	338849	325907	394648	322139	396716	130856	136205	114095	106725	91363.9	145996	312271	300204	309883	308206
NEG_1090	1.879	179.057	beta-D-Fructofuranose	[M-H]-	C6H12O6	Organic oxygen compounds	Organooxygen compounds	C02336	0.847	136947	121241	144517	155413	113851	136294	296404	232374	297073	250420	247506	307407	155633	125340	183250	133562	192507	175376	188047	148313	164603	123639	171231	109162	110278	112519	112431
NEG_824	1.884	164.074	Phenylalanine	[M-H]-	C9H11NO2	Organic acids and derivatives	Carboxylic acids and derivatives	C00079	0.88	4.01566e+06	3.41263e+06	4.36299e+06	3.92404e+06	3.44693e+06	3.59769e+06	4.72355e+06	3.76205e+06	4.4572e+06	4.13813e+06	4.17216e+06	4.37963e+06	2.37717e+06	2.21139e+06	2.78211e+06	2.21685e+06	2.83737e+06	1.10571e+06	1.14167e+06	1.03963e+06	1.03458e+06	946397	1.14295e+06	1.26292e+06	1.25615e+06	1.25617e+06	1.28769e+06
NEG_4759	1.897	353.088	Neochlorogenic acid	[M-H]-		Organic oxygen compounds	Organooxygen compounds	C17147	0.945	2.68651e+06	1.64353e+06	3.00837e+06	2.55559e+06	1.67713e+06	2.04797e+06	989220	617369	911205	826008	802785	858409	571099	501719	793766	424711	855070	647031	696467	598631	572826	435714	695318	255411	210285	224195	231193
POS_2564	1.934	264.082	Gemcitabine	[M+H]+	C9H11F2N3O4	Nucleosides, nucleotides, and analogues	Pyrimidine nucleosides	C07650	0.721	8802.05	8983.97	7871.78	8993.8	8496.35	7856.1	14617.7	12533	12157.5	11207.2	12881.3	12482.1	7943.29	8980.13	6350.06	7607.08	6379.91	6814.13	3394	7706.08	4678.44	4359.52	7282.85	9743.02	9723.87	9724.66	10279.7
POS_2954	1.939	287.111	Dihydro-3-methylene-4-[(2E)-3-methyl-4-(tetrahydro-4-methyl-5-oxo-2-furanyl)-2-buten-1-yl]-, (4R)-2(3H)-furanone,	[M+H-2H2O]+	C15H20O4	Lipids and lipid-like molecules	Prenol lipids		0.756	105214	43827.2	78425.3	70569.9	46454	97529	21182.8	15938.1	16213.7	18019.8	17474.9	16911.2	26410.2	26517.9	34165.8	25720.6	30448.6	29634.6	29740.6	27740.8	26590.3	23611.9	28877.3	14778.7	14604.6	14434.1	15485.6
NEG_4646	1.942	346.053	3'-Adenylic acid	[M-H]-	C10H14N5O7P	Nucleosides, nucleotides, and analogues	Ribonucleoside 3'-phosphates	C01367	0.825	3733.99	3027.81	3366.71	2924.05	3325	2809.65	6535.36	5143.75	6052.41	5453.4	5086.23	5080.98	9856.18	10216.3	12094	10000.9	13584.4	3266.18	3174.26	3176.45	3139.61	2753.87	3112.24	1529.68	1823.44	1531.32	1529.87
POS_2216	1.954	242.1	D-Pantothenic acid	[M+Na]+	C9H17NO5	Organic acids and derivatives	Carboxylic acids and derivatives		0.831	550137	330559	579161	490072	349095	414204	428986	306938	379640	328151	384053	387135	947659	885958	1.15708e+06	733309	1.15413e+06	475744	434858	227283	198895	109415	505580	291564	215501	236110	222826
POS_1912	1.954	228.159	N-(2-Oxooxolan-3-yl)octanamide	[M+H]+	C12H21NO3	Organic acids and derivatives	Carboxylic acids and derivatives		0.722	76278.4	66677.4	81635	70320.5	65523.5	65239.9	45759.6	43004.1	47167.4	42878.7	38902.9	37635.4	567265	542073	645240	533423	646035	211763	219699	197974	193701	182479	227675	156040	156744	157500	157501
POS_5071	1.963	383.091	Jaceidin	[M+Na]+	C18H16O8	Phenylpropanoids and polyketides	Flavonoids		0.72	14739.6	10166.8	24698.5	17396	15218.7	17034.3	27054.8	16548	21301.6	17014.4	21809.1	21123.7	47181.1	44472.3	60004.9	35283.7	57105.1	35665.5	34322.7	25278.9	30282.4	26353.3	2962.77	25114.9	17820.6	27778.9	18113.5
POS_1776	1.992	220.119	Pantothenic acid	[M+H]+	C9H17NO5	Organic acids and derivatives	Carboxylic acids and derivatives	C00864	0.947	396322	300653	444547	331783	286137	287519	542886	372115	427704	438359	420016	414210	731277	675734	1.04632e+06	687481	998501	511124	552726	435049	377685	378581	521485	229921	333286	229840	242830
NEG_1686	1.997	218.104	Calcium pantothenate	[M-H]-	C9H17NO5.1/2 Ca				0.921	860369	742677	890770	892544	751213	793993	1.238e+06	1.05162e+06	1.18813e+06	1.17529e+06	1.14913e+06	1.16723e+06	1.27098e+06	1.2014e+06	1.52086e+06	1.23835e+06	1.61315e+06	1.16476e+06	1.20508e+06	1.10228e+06	1.07474e+06	948558	1.24624e+06	240598	246185	240846	266717
NEG_7422	2.009	459.112	Parishin E	[M-H]-	C19H24O13				0.828	126005	99593.9	137161	120600	102342	102677	48324.1	40190.6	45451.1	44045.4	43629.3	45011.6	405419	414173	537777	328087	618798	79432.9	84716	71558.7	69445	61900.1	91454.9	20153.6	20243.8	18905.1	20248.2
POS_2995	2.015	289.124	Myclobutanil	[M+H]+	C15H17ClN4	Phenylpropanoids and polyketides	Homoisoflavonoids		0.794	17759.9	18030	15132.2	18664	16734.6	18222.5	27371.1	23461.7	26345.7	24739	26076.4	27531.2	24165.7	24205.2	21121.5	22559.2	20807.7	17368.5	17673.2	12018.9	11583.5	10627.5	18461.5	17395.8	16233.2	16411.5	16610.9
NEG_996	2.017	173.008	trans-Aconitic acid	[M-H]-	C6H6O6	Organic acids and derivatives	Carboxylic acids and derivatives	C02341	0.819	9320.01	6948.18	10124.6	9761.37	7046.23	7641.04	2869.54	2836.98	2587.56	2807.66	2964.24	2899.87	28074.5	28725	35559.7	21635.9	37071.6	7531.43	8331.31	7704.29	6392.37	5971.98	7639.67	1476.68	1444.1	1275.3	1476.07
NEG_1048	2.023	175.063	2-Isopropylmalic acid	[M-H]-	C7H12O5	Lipids and lipid-like molecules	Fatty Acyls		0.866	2.41781e+06	1.90287e+06	2.60171e+06	2.45246e+06	1.93085e+06	1.97902e+06	882950	670780	778967	801842	765930	807207	2.40545e+06	2.33811e+06	2.85313e+06	2.10459e+06	3.15793e+06	1.07343e+06	1.17927e+06	970632	904568	754663	1.26236e+06	211267	215099	211462	221214
NEG_418	2.026	131.071	2-Hydroxy-4-methylvaleric acid	[M-H]-	C6H12O3	Lipids and lipid-like molecules	Fatty Acyls		0.716	40777	31170.7	42636.6	39818.3	30751.6	32333.3	16691.4	11910	14814.7	15199.3	14042	15112.4	37798.9	37919.1	50452.7	33569.1	51029	19518	21328.7	17573.2	16202.1	13176.4	23670	4441.37	4542.72	4319.72	5003.64
NEG_1358	2.03	197.043	Vanillylmandelic acid	[M-H]-	C9H10O5	Benzenoids	Phenols	C05584	0.714	12185.2	15117.6	12646.2	13914.1	15198	14632.5	7328.42	6471.63	6900.9	7300.16	6455.79	6875.76	10383.9	10621.4	9831.25	11482.4	9497.79	6694.48	6275.91	6479.53	6864.6	6867.9	6173.23	2689.49	2723.29	2493.02	2783.64
NEG_1257	2.042	191.021	Hydron;2-hydroxypropane-1,2,3-tricarboxylate	[M-H]-	C6H8O7	Organic acids and derivatives	Carboxylic acids and derivatives		0.871	5944.67	10636.7	9262.95	9015.78	10371.5	9088.03	2785.96	1861.68	1655.7	546.724	1368.96	1971.32	30434	33488.2	24810.7	24759.4	34684	12663.3	13075.5	14897.2	14880.9	15774.5	14621.3	1938.91	1950.18	2976.3	1985.02
NEG_7981	2.044	479.086	Myricetin-3-O-galactoside	[M-H]-	C21H20O13	Phenylpropanoids and polyketides	Flavonoids		0.709	36890	24892.2	48864.5	34143.1	28267.6	31708.9	381.844	310.205	251.482	651.412	565.877	134.9	18447.3	15696	23391.4	12297.9	26242.6	8513.28	8425.28	6821.63	7705.72	5004.23	11774.5	2393.66	1365.71	1759.23	1558.42
POS_10077	2.058	611.158	Cyanin	[M]+	[C27H31O16]+	Phenylpropanoids and polyketides	Flavonoids		0.789	10500.3	3267.48	17978.1	33262.6	10215.3	7279.82	5067.09	4105.14	3194.04	9006.73	7139.1	4753.6	28836.6	24558.5	48576.6	24998.7	60566	12009.4	7849.33	9917.48	29697.9	5674.02	19739.1	4741.75	3589.93	4681.23	3290.7
POS_6172	2.06	433.164	(2S)‐2‐(2‐aminoacetamido)‐3‐(4‐cyanophenyl)‐N‐(9H‐fluoren‐2‐yl)propanamide	[M+Na]+	C25H22N4O2	Organic acids and derivatives	Carboxylic acids and derivatives		0.848	53779.4	40888.5	58987	46636.1	43855.7	50222.6	48697.7	34590.5	39377.3	40242.9	39018.2	41247.1	36952.6	31761	34695	30107.4	40678.8	24396.5	26058.5	21837.8	23572.4	8643.63	27364.2	27185	19901.1	28587.5	21588.4
POS_2614	2.074	268.104	2-(6-Aminopurin-9-yl)-5-(hydroxymethyl)oxolane-3,4-diol	[M+H]+	C10H13N5O4	Nucleosides, nucleotides, and analogues	Purine nucleosides		0.931	95987.8	63914.4	111457	80358.3	64378.4	74606.3	145126	69931.2	135224	139620	135970	138803	264906	238122	381297	226748	393788	352139	355470	290895	262610	208066	360963	121852	102109	105974	102076
POS_654	2.075	146.164	Spermidine	[M+H]+	C7H19N3	Organic nitrogen compounds	Organonitrogen compounds	C00315	0.899	19024.2	62570.4	54997	47731.2	18521.5	41757.5	65988.5	51085.2	51995.3	27758	34888.4	39063.4	25040.6	30210.4	52639.3	66286.4	73220.7	68781.4	83129.6	76665.9	65858.5	32843.9	30143.8	39675	42125.1	36211.9	51277.9
NEG_2605	2.087	266.089	Adenosine	[M-H]-	C10H13N5O4	Nucleosides, nucleotides, and analogues	Purine nucleosides	C00212	0.892	14124.1	13767.1	15116.1	13489.5	13180.2	14371.3	64364.6	48997.3	56801.9	59132.7	59428	61844.3	32391.5	29353.5	37993.6	32685.9	36267.6	87644.4	87830	83835.1	84160	77421.8	89865.2	18934.2	20300.8	19115.4	22509.6
NEG_444	2.088	134.047	Adenine	[M-H]-	C5H5N5	Organoheterocyclic compounds	Imidazopyrimidines	C00147	0.93	17724.4	16660.4	18234.6	17616	16033.2	18263.2	72685.8	56938.8	65209.4	70336.9	66751.9	71040.9	41115.6	35073.8	43904.5	38691.1	41077.6	99810	103504	93469.2	96941.9	85682.4	102999	23091.9	25760.9	24953.5	27920.9
NEG_1108	2.096	180.034	Acamprosate	[M-H]-	C5H11NO4S	Organic acids and derivatives	Organic sulfonic acids and derivatives		0.801	7332.54	6267.83	8824.59	6342.37	6286.32	6207.15	12757.9	8521.04	9397.18	11244.6	10649.9	10476	6225.05	6113.15	7610.02	5727.92	8687.61	10554	11851.4	9851.1	8908.7	9534.05	13332.4	5280.05	6015.12	5422.49	5281.92
POS_3455	2.124	315.103	Pantoyl lactone glucoside	[M+Na]+	C12H20O8	Lipids and lipid-like molecules	Fatty Acyls		0.766	13284.2	10336.5	14926.7	10817.6	9685.72	10082	6457.96	5929.87	5696.88	5441.01	5838.08	5912.24	14122.6	13813.1	14377	11487.9	16132.2	9906.6	9368.31	7793.1	7477.97	7014.65	10419.8	7250.49	7598.85	6834.04	7323.62
NEG_5746	2.135	395.16	gamma-Mangostin	[M-H]-	C23H24O6	Organoheterocyclic compounds	Benzopyrans		0.709	1501.54	1124.73	1513.22	1560.87	778.574	817.678	2185.55	1348.1	1899.19	1586.22	1476.19	1999.29	20025.6	16635.5	20478.4	16274.9	20115.4	28790.4	31972	26535.6	25767.9	20475	30808.7	6446.26	6141.36	6656.08	6392.84
NEG_8974	2.138	515.137	Coumarin + 1O + 1MeO, O-Hex-Hex	[M-H]-	C22H28O14	Phenylpropanoids and polyketides	Coumarins and derivatives		0.765	371989	349909	427003	398190	332157	353740	360920	283923	328562	340461	330868	338211	438172	421699	492397	364933	520591	396282	445848	370444	359648	314408	436833	69828	75282.1	73513.1	79296.2
POS_2487	2.158	259.043	Lofexidine	[M+H]+	C11H12Cl2N2O	Benzenoids	Benzene and substituted derivatives		0.744	364182	272191	435537	320826	283004	313036	166081	118864	139447	139038	132181	149032	253439	254088	317622	230693	325706	101208	98160.9	76908.5	80130.5	59956.9	116456	150868	150890	148415	149465
NEG_4052	2.162	325.094	Coumaric acid 4-O-glucoside	[M-H]-	C15H18O8	Organic oxygen compounds	Organooxygen compounds		0.82	3826.36	4674.99	4128.11	5095.99	4504.05	3878.45	4498.41	3309.5	3712.18	3645.01	4040.48	3831.78	8103.19	7670.18	6288.18	6188.59	7158.32	32518.1	34767.3	31194.8	28291.7	28049.3	32796.4	4107.25	5212.77	5036.55	5205.47
POS_4681	2.185	367.1	3-[3-hydroxy-2-[(2S,3R,4S,5S,6R)-3,4,5-trihydroxy-6-(hydroxymethyl)oxan-2-yl]oxyphenyl]propanoic acid	[M+Na]+	C15H20O9	Organic oxygen compounds	Organooxygen compounds		0.837	52099.5	48361.1	56270.7	54480.5	48308.5	51038.9	72129.1	57554.2	63484.1	59854.5	59777	66267.4	154000	150750	165221	157670	168823	102880	105741	99193.2	87909.5	89739	109857	84165.8	84779.1	83582	83577.9
POS_5073	2.185	383.124	Junipediol A 8-glucoside	[M+Na]+	C16H24O9	Organic oxygen compounds	Organooxygen compounds		0.764	6244.68	4953.45	5756.76	12304.2	5177.56	12033.7	9625.16	7967.94	7650.57	13114.5	8057.52	9581.62	15129	17579.8	14774.4	14860.3	15925.2	31668.6	31443.5	28391.8	29553.3	26411.6	38907.9	13792.8	11350.8	12753.8	12030.3
NEG_4507	2.222	341.087	Caffeic acid hexoside	[M-H]-	C15H18O9	Phenylpropanoids and polyketides	Cinnamic acids and derivatives		0.848	45204.9	33746.9	44866.4	38489.8	32712.8	36988.4	47649	36088.9	42233.1	48694.7	40348.8	43995.4	58114	52812.2	70664	55322.2	75056.2	63357.7	74194.3	61015	56643.5	49785.5	70881.9	20587.1	20419.9	19705.8	20588.4
NEG_3935	2.245	319.047	Dihydromyricetin	[M-H]-	C15H12O8	Phenylpropanoids and polyketides	Flavonoids		0.764	124372	112702	140169	124045	114515	119771	1449.55	213.77	319.048	825.99	1592.76	1210.32	77650	77881.7	96481.6	78768.2	86345.5	16458.5	17926	17279.4	15337.1	15032.2	17150.1	20719	23420.4	22958.4	23710.5
NEG_475	2.248	137.025	Salicylic acid	[M-H]-	C7H6O3	Benzenoids	Benzene and substituted derivatives	C00805	0.864	19121.3	19948.6	20592.4	20704.7	17702.1	21417.4	10098.7	9562.97	11803.1	10671.1	10410.5	10316	23103.6	18609.9	22264.1	21634.8	21759	47407.6	50513.6	48240.4	47866.6	44536	46653.8	14134.1	15107.8	14604.6	15945.7
NEG_341	2.254	121.03	4-Hydroxybenzaldehyde	[M-H]-	C7H6O2	Organic oxygen compounds	Organooxygen compounds	C00633	0.857	45572.4	32097.8	54515.8	42351	36461.7	41702.4	14418.7	13321.9	15904.7	15240.7	13207.8	16428.7	43423.5	40768.8	55377	39459.7	71684.4	23844.6	23110.9	17727.8	22723.8	18885.4	25082.5	12172.3	12376.3	13113.7	12179.6
NEG_7482	2.259	461.076	Kaempferol 3-glucuronide	[M-H]-	C21H18O12	Phenylpropanoids and polyketides	Flavonoids		0.711	84921.8	62810.2	83681.1	99423.7	38022.4	75183.8	4870.04	4320.68	4504.67	3516.06	3468.34	4571.9	53530.8	51768.5	61010.4	46332.3	63276.9	17999.8	17844	16233	15942.7	14387.1	19325.4	16630.6	16041	17284.1	16844.4
POS_722	2.265	150.111	Triethanolamine	[M+H]+	C6H15NO3	Organic nitrogen compounds	Organonitrogen compounds	C06771	0.85	661660	342384	401515	675611	378254	352378	122018	293807	549032	161976	865138	402669	429862	356153	431906	325109	484306	192889	139833	362668	175174	97948.1	116881	380482	317460	234451	352679
NEG_5169	2.267	371.093	Stenophylline A	[M+FA-H]-	C15H18O8	Organic oxygen compounds	Organooxygen compounds	C05158	0.909	10853.6	9413.91	10660.5	10719.4	7645.42	9805.95	11342.5	10560.7	11887.2	11392	11905	11638.4	20442.2	18776.5	23322.7	20237.8	22445.6	25277.2	26756.3	25140.6	23863.6	23251.6	26576.1	7727.6	7907.34	7060.02	8497.4
NEG_327	2.28	119.051	4-Vinylphenol	[M-H]-	C8H8O	Benzenoids	Benzene and substituted derivatives	C05627	0.716	1984.85	2295.79	1556.11	3036.84	2497.81	2385.75	3961.53	3829.87	3670.44	3718.42	3898.41	3236.95	9832.1	8884.15	10585.7	9342	11790.7	14926.8	15887.5	14147.6	13373.4	12037.5	15475.5	2759.88	2946.63	2883.55	2987.13
POS_3685	2.293	329.149	Tiapride	[M+H]+	C15H24N2O4S	Benzenoids	Benzene and substituted derivatives		0.732	8087.59	8259.24	12519.7	9223.87	8694.97	8924.8	6772.56	5432.4	5304.71	5421.67	5481.44	4115.29	17329	16368.1	21884.6	16779.2	19980.1	4927.42	4950.64	4661.12	3436.34	3549.49	5596.1	6271.99	4703.72	6267.81	6081.59
POS_3579	2.326	323.109	Desmedipham	[M+Na]+	C16H16N2O4	Benzenoids	Benzene and substituted derivatives		0.709	27311.5	24838.4	28929.4	26997.6	26131.2	26770.5	15296.2	14224.7	14206.7	13997.4	13494.3	14429.4	8474.73	8268.3	8467.68	6932.25	7429.15	45790.9	49361.4	43222.7	41941.9	42109.2	52327.6	19211.2	20846.7	19215.1	19426.5
NEG_627	2.331	153.057	Hydroxytyrosol	[M-H]-	C8H10O3	Benzenoids	Phenols		0.849	19899.7	15951.9	17987.8	19842.3	17705.3	18541.6	17334.7	12824.5	16308.2	16365.1	16053.1	15377.8	13063.8	9722.32	12016.3	11297.3	12044.7	8568.7	8726.83	8202.68	8288.32	7474.08	8879.41	6544.17	6962.22	6762.98	7005.71
POS_4931	2.338	377.14	Xanthohumol	[M+Na]+	C21H22O5	Phenylpropanoids and polyketides	Linear 1,3-diarylpropanoids	C16417	0.811	2807.32	2778.78	3308.7	2691.68	2302.64	2658.51	2839.01	1825.32	2110.34	2359.51	1738	2380.64	5445.09	5281.94	5945.83	5309.59	7270.97	22801.9	24105.7	19983	20141.4	17178.1	26184.3	7333.29	7799.42	7300.16	7312.33
NEG_10462	2.342	577.134	Procyanidin B2	[M-H]-	C30H26O12	Phenylpropanoids and polyketides	Flavonoids	C17639	0.863	233.399	587.526	591.02	410.335	1071.55	215.628	54539	43591.8	47870.8	49251.4	49753.5	48176.8	35040.8	31603.1	24097.6	34478.5	33911.4	55273	57050.5	48833.9	49014.7	45279.9	60721	19253.6	19616.4	19615.5	19615.8
POS_889	2.352	159.091	1-Benzylimidazole	[M+H]+	C10H10N2	Organoheterocyclic compounds	Azoles		0.707	37025.9	30027.4	45187.4	33284.1	30965.6	33862.7	46681.3	35112.6	41366.1	37583.3	40084.1	40720.4	41183.6	37914.4	50244.1	37250.3	47073.2	24967.3	24251	21846	21029.4	19672	26015.6	25015.9	24170.2	25077.3	24919.2
POS_642	2.352	146.059	Indole-3-carboxaldehyde	[M+H]+	C9H7NO	Organoheterocyclic compounds	Indoles and derivatives	C08493	0.776	84149.1	72514.5	97688.9	81586.7	68278.5	80133.9	91520.6	73511.6	78857.3	79666.3	76188	83426.7	91128.2	86516.8	115631	81172.2	113167	47946.3	52895	44437.6	42756.4	39380	55006.5	54142.3	53922	55413	53923.6
POS_623	2.353	144.079	Tryptophol	[M+H-H2O]+	C10H11NO	Organoheterocyclic compounds	Indoles and derivatives	C00955	0.711	33413.8	26464.4	37757	29161.5	25325.8	28715.3	33746.5	27763.4	31379.9	30359.7	30287	31856.5	34473.4	32990.9	44957.8	30868.1	46092.4	19040.5	19879.7	16877.8	16666.3	15915.2	20360.4	21338.9	22065.1	21732	21822.5
POS_461	2.356	132.08	2-Methylindole	[M+H]+	C9H9N	Organoheterocyclic compounds	Indoles and derivatives	C04635	0.729	21822.3	18233.4	24632.4	18798.9	18081.1	19089.9	25733.1	22598.2	21212.4	22094.8	22473.4	23400.2	24859.2	23171.5	29826.6	23157.7	31520.8	13755.7	13829.7	12786.4	12508.8	12316.9	15172.5	15793	14703.3	15794	15668.2
POS_343	2.357	118.064	Norvaline	[M+H]+	C5H11NO2	Organic acids and derivatives	Carboxylic acids and derivatives	C01826	0.837	15948.7	13698.2	20616.4	15933.2	14729.2	15977	21919.8	17371.6	18292.3	19108.1	18059.6	19409.6	20488.4	19381.2	25118.1	18570.7	26420.4	11743.5	12031.4	10343.9	9457.82	8875.36	12857.8	11997.2	11619	12240.9	11938.3
NEG_3129	2.358	285.041	7,3',4',5'-Tetrahydroxyflavone	[M-H]-	C15H10O6	Phenylpropanoids and polyketides	Flavonoids		0.768	415035	1.24021e+06	355989	510572	834186	866585	897.446	1384.01	562.243	682.031	509.384	627.479	382254	122448	194731	636725	301561	4517.72	15418.2	13698.1	11053.9	75170.3	6084.52	104620	128880	169310	133563
NEG_4515	2.358	341.11	Lactulose	[M-H]-	C12H22O11	Organic oxygen compounds	Organooxygen compounds	C07064	0.735	4572.22	1933.47	3853.32	5422.01	5998.65	7832.77	199037	229988	232915	179725	201434	223833	24657	28150.4	13015.9	29272.5	24868.9	60338.5	72881	109357	88610.6	55839.3	75292.3	30380.4	30572.7	32528.1	32432
POS_415	2.359	130.063	Quinoline	[M+H]+	C9H7N	Organoheterocyclic compounds	Quinolines and derivatives	C06413	0.74	15008.5	12417.9	15843	14889.9	12472.5	12909.8	22758.3	17517.9	20746.9	20437.4	18756.3	21471.6	23314.4	20214	26048.6	19843.1	26743.6	12971.2	12277.9	11925.8	11291.5	8962.59	14560.9	13624	13518.6	12716.1	13625.6
NEG_1460	2.359	203.083	Tryptophan	[M-H]-	C11H12N2O2	Organoheterocyclic compounds	Indoles and derivatives	C00078	0.971	1.45171e+06	1.18685e+06	1.47538e+06	1.36742e+06	1.22074e+06	1.33332e+06	1.70145e+06	1.44311e+06	1.63286e+06	1.60777e+06	1.58056e+06	1.58713e+06	1.26438e+06	1.25957e+06	1.59854e+06	1.2567e+06	1.67147e+06	832346	849068	767175	756014	727609	856805	530058	531205	530778	528383
POS_840	2.361	157.077	2,2'-Bipyridine	[M+H]+	C10H8N2	Organoheterocyclic compounds	Pyridines and derivatives		0.701	21693.3	24302.5	30233.6	30763.1	13793.8	19946.8	39645.4	18936.8	23342.4	20387.6	18489.1	24102.4	20295.6	24397.1	22737.5	28796	24322.7	16001.9	21936.2	19486.2	24864.7	17601.3	32596.8	19815.4	30024.4	24184.7	23972.8
NEG_4571	2.361	343.102	3-[2-Hydroxy-3-[(2S,3R,4S,5S,6R)-3,4,5-trihydroxy-6-(hydroxymethyl)oxan-2-yl]oxyphenyl]propanoic acid	[M-H]-	C15H20O9	Organic oxygen compounds	Organooxygen compounds		0.791	12427	12112.6	11702.2	12417.8	10120.6	13658.9	31370.2	20838.4	28721.3	28479.4	26641.4	28072.3	24004.9	25140.5	28569.7	24884.4	34338.7	35262.2	36923.1	30778	30416.2	26332.8	38518.5	8846.29	9361.37	8864.5	9273.7
NEG_270	2.387	113.06	Pyrrolidine-2-carboxamide	[M-H]-	C5H10N2O	Organic acids and derivatives	Carboxylic acids and derivatives		0.717	91652.8	83650.4	95326.7	93534	75625.1	87136.1	15120.9	8108.37	12290.1	10930.1	10829.5	11070.8	73094.9	68717	90321.9	64942.7	115338	7052.65	7887.71	5282.63	6012.11	3996.34	9484.32	6100.15	6318.54	6465.76	6468.46
POS_4101	2.467	344.131	Coumaric acid O-glucoside	[M+NH4]+	C15H18O8	Organic oxygen compounds	Organooxygen compounds		0.814	33970.6	24440.3	40607.9	33162.4	26389	27551.3	40159.1	31685.9	33303	36443.3	37444.6	35482.5	24780.5	24875.9	31810.9	17470	30557.9	38120.1	37873.9	31916.9	30988.6	29763	40382	23180.9	23388.6	21674.5	23388
POS_6393	2.467	443.156	Pomiferin	[M+Na]+	C25H24O6	Phenylpropanoids and polyketides	Isoflavonoids	C10519	0.726	13443.5	9548.57	15777.6	11997	8851.97	11434.5	9386.84	7083.06	7388.32	8173.52	9028.45	9875.43	16329	17535.3	20186.9	13247.6	23270.3	19069.3	16615.9	11124	13567	11991.1	21053	10756.7	9332.42	9667.14	9305.71
POS_5556	2.472	407.096	6,7-Dimethoxy-8-(beta-D-glucopyranosyloxy)-2H-1-benzopyran-2-one	[M+Na]+	C17H20O10	Phenylpropanoids and polyketides	Coumarins and derivatives		0.729	5175.56	5401.58	6179.38	4783.7	5127.44	4051.88	4153.51	3127.39	3089.94	2984.11	3248.86	2737.16	5815.42	6055.88	6883.84	5608.53	7983	5789	5339.27	4940.82	5276.36	4826.72	6092.37	3510.28	3924.49	3510.19	3509.28
NEG_13713	2.485	755.167	Quercetin 3-O-[2''-O-(6'''-O-p-coumaroyl)-b-D-glucopyranosyl]-a-L-rhamnopyranoside	[M-H]-	C36H36O18				0.753	28681.7	28289.3	29548.4	25403.1	26278.6	24203.3	120.253	56.5269	63.6778	49.9338	88.0596	99.4228	21594.5	27709.8	39543.9	26407.3	43327.8	5820.88	5221.5	2881.54	3832.83	3531.19	6462.05	4384.76	4674.99	4644.44	3411.74
NEG_476	2.505	137.025	2,5-Dihydroxybenzaldehyde	[M-H]-	C7H6O3	Organic oxygen compounds	Organooxygen compounds	C05585	0.839	14872.3	2608.84	11211.9	6852.15	7626.82	10388.2	16145.6	13523.4	13519.1	9419.98	11487.2	7561.76	13283.3	10801.8	12067.2	9324.03	13330.1	44927.2	49920.1	46524.4	45291.3	42842.9	46683.5	14446.1	14775.8	15060	15058.8
NEG_7051	2.508	447.093	Cyanidin 3-O-galactoside	[M-2H]-	[C21H21O11]+	Phenylpropanoids and polyketides	Flavonoids	C08647	0.914	7.18519e+06	5.74591e+06	7.31895e+06	6.10523e+06	4.47625e+06	2.14875e+06	3397.98	3944.96	2200.13	2749.2	8882.56	7886.18	3.58644e+06	3.29871e+06	4.90848e+06	1.11927e+06	1.44592e+06	286910	263132	175071	184518	132231	372604	1.36577e+06	1.52246e+06	776370	1.44698e+06
NEG_3317	2.519	293.125	Glutamylphenylalanine	[M-H]-	C14H18N2O5	Organic acids and derivatives	Carboxylic acids and derivatives		0.74	792497	598872	810565	728479	616521	690195	404598	324405	355378	370510	343791	382966	593420	537019	953876	520603	800145	282161	247990	217842	238278	185679	288020	158847	158194	156250	159371
NEG_10772	2.525	593.127	[6-[2-(3,4-Dihydroxyphenyl)-8-hydroxy-4-oxochromen-7-yl]oxy-3,4,5-trihydroxyoxan-2-yl]methyl (E)-3-(4-hydroxyphenyl)prop-2-enoate	[M-H]-	C30H26O13	Phenylpropanoids and polyketides	Flavonoids		0.778	295288	948901	240867	473445	1.02591e+06	605074	929.571	1436.97	771.304	504.759	537.149	439.287	465403	547151	354222	723175	319624	9023.09	12902.7	28563.5	9425.78	49357.1	13296.2	83710	79163.4	219833	72345.8
POS_5732	2.543	413.139	1-[4-[2-(7-Methoxy-1,3-benzodioxol-5-yl)ethyl]phenoxy]-3-methylbutane-2,3-diol	[M+K]+	C21H26O6	Phenylpropanoids and polyketides	Stilbenes		0.817	14868.9	14628.8	11938.9	12031.3	15247.2	13231.2	31160.9	27370.9	27865.6	25910.8	28857.7	23013.9	83703.2	56071.1	75714.8	72497.4	84204.4	37531.5	49417.5	39449.1	34440.5	43503.3	42536.4	27601.5	37160.5	34504.6	35689.9
POS_6506	2.563	449.107	Plantaginin	[M+H]+	C21H20O11	Phenylpropanoids and polyketides	Flavonoids		0.932	2.76075e+07	2.49232e+07	1.66391e+07	1.58239e+07	1.89031e+07	2.90535e+07	8947.2	7022.84	5788.44	5669.63	4908.51	7915.63	1.60453e+07	1.84261e+07	1.11522e+07	2.10864e+06	2.1028e+07	465764	370634	267897	360425	174959	500843	6.65817e+06	5.32181e+06	5.61509e+06	5.31101e+06
NEG_461	2.565	135.047	Phenylacetic acid	[M-H]-	C8H8O2	Benzenoids	Benzene and substituted derivatives	C07086	0.729	31889.3	22291.3	26295.3	26782.9	21352.5	29318.9	14251.5	13347.3	14721.5	15040.2	14348.6	14933.4	16681.9	14659.5	17082.3	16280.9	19947.8	17531.9	16753.5	14807.8	16929.1	13825.7	17906.1	8205.47	8176.7	8318.61	8316.88
NEG_4762	2.566	353.09	Cryptochlorogenic acid	[M-H]-	C16H18O9	Organic oxygen compounds	Organooxygen compounds		0.985	8.69043e+06	5.96558e+06	7.28226e+06	7.42858e+06	5.65469e+06	6.65246e+06	2.3007e+06	1.87881e+06	2.13989e+06	2.27645e+06	2.0947e+06	2.36766e+06	2.79539e+06	2.62073e+06	3.28213e+06	2.39816e+06	3.47344e+06	3.21976e+06	2.89693e+06	2.60333e+06	2.79977e+06	2.00496e+06	3.20536e+06	1.14735e+06	1.13043e+06	1.13064e+06	1.20328e+06
NEG_1079	2.567	179.034	cis-Caffeic acid	[M-H]-	C9H8O4	Phenylpropanoids and polyketides	Cinnamic acids and derivatives		0.916	151002	115482	145956	147185	114867	129415	49143.6	41041.6	47694.3	48036.7	48587	51887.3	54593.2	51561.8	59905.9	47506	62140.1	63661.1	60990	51222.4	57972.4	41730.8	62412.8	25437.3	25031.7	25059.1	26217.5
NEG_5885	2.581	401.108	2-O-Glucosyloxy-4-methoxycinnamic acid	[M+FA-H]-	C16H20O9	Organic oxygen compounds	Organooxygen compounds		0.827	4096.06	4560.38	4552.65	4028.6	3239.57	4245.82	5000.92	4561.01	4579.3	4942.19	4659.67	5115.98	18634.1	17660.7	18874.3	17185.8	22967.4	23437.4	22871.1	19359.2	19757.2	19115.3	22898.3	5070.5	5425.74	5152	5070.66
NEG_1314	2.583	193.05	3-(4-Hydroxy-3-methoxyphenyl)-2-propenoic acid	[M-H]-	C10H10O4	Phenylpropanoids and polyketides	Cinnamic acids and derivatives		0.825	3449.73	2785.02	3879.15	3525.16	2901.46	3845.95	4736.96	3848.56	4653.13	5310.02	4343.74	4870.92	17726.1	16698.8	21088.5	14901.3	19718.7	26119.1	24391.9	19640	24436.9	17233.1	26517	5551.53	5551.44	5575.07	5622.07
NEG_844	2.591	165.055	Caffeyl alcohol	[M-H]-	C9H10O3	Phenylpropanoids and polyketides	Cinnamyl alcohols		0.817	7942.36	6177.34	7162.09	7295.81	6622.11	6577.4	6667.26	4944.58	5327.53	5914.97	5996.53	6014	4122.33	3492.96	3861.49	3801.8	4380.95	20625.8	20169.3	18051.1	18437.6	16324.2	19336.6	4968.87	5340.03	5177.26	5834.32
POS_8210	2.592	523.142	Haploperoside C	[M+Na]+	C22H28O13	Phenylpropanoids and polyketides	Coumarins and derivatives		0.765	16513.5	9732.15	15580.2	13233.4	8437.81	11297.6	13998.6	9466.07	11189.3	10341.7	11445.2	12974.3	108104	104108	149400	106486	156792	33437.6	31890.4	24562.1	27224.1	19109.7	37700.3	28597.9	27331.9	27322.9	27693
NEG_4403	2.592	337.149	Bavachalcone	[M-H]-	C20H20O4				0.778	21551.3	13413.3	21752.6	18971.6	14262.3	18179.6	4231.63	3428.16	4077.05	3783	4003.56	4647.51	20895.6	18304.6	25680.5	17039.6	32862.1	4905.45	6557.81	6517.8	4427.33	3350.72	5095.61	2578.65	2567.51	2387.47	2578.45
POS_6121	2.607	431.13	Nodakenin	[M+Na]+		Phenylpropanoids and polyketides	Coumarins and derivatives		0.839	654.892	590.799	791.506	239.798	639.166	366.085	21486.1	18503.2	19337.8	18248.8	20010.2	18432.7	2134.39	1185.38	1180.92	2441.22	1376.65	6208.48	7068.82	6521.17	5614.47	6602.24	6409.1	3059.86	3547.89	3428.77	3357.37
NEG_1532	2.607	206.082	N-Acetyl-L-phenylalanine	[M-H]-	C11H13NO3	Organic acids and derivatives	Carboxylic acids and derivatives	C03519	0.802	76526.2	44630.1	69865.8	58523.5	41890.5	53331.4	26380.4	23533.1	23091.7	25283.2	24216.8	22782.1	75835.6	74884.9	99982.4	66356.8	140330	16713.5	15543.2	13877.2	14837.4	12603.3	16727	9081.05	9000.2	9115.4	9065.99
POS_5099	2.608	384.163	Prazosin	[M+H]+	C19H21N5O4	Organoheterocyclic compounds	Diazinanes	C07368	0.784	10066.2	9895.91	9901.25	9479.65	9878.99	11004.2	4860.75	3677.84	4663.78	3817.95	3937.76	4097.53	1059.97	5324.47	17265.5	1119.02	1143.41	1411.19	1338.39	1014.91	859.513	805.564	229.969	5582.5	5484.34	5471.26	5410.08
POS_490	2.621	133.064	Cinnamaldehyde	[M+H]+	C9H8O	Phenylpropanoids and polyketides	Cinnamaldehydes	C00903	0.811	8681.65	7949.99	8982.44	8561.5	8305.19	9143.13	10854.2	10946.5	9407.7	9428.88	9851.82	10587.4	22302.8	21211.6	24547.7	21060.4	24068	38658.2	40496	34156.3	34384.7	31651.3	39653.4	14551.8	15264.8	14360.5	15097.1
NEG_575	2.628	149.062	p-Coumaryl alcohol	[M-H]-	C9H10O2	Phenylpropanoids and polyketides	Cinnamyl alcohols		0.873	2276.96	2085.91	1790.14	2623.42	2185.39	2561.61	6431.26	4954.17	6184.73	6046.18	6307.21	6010.64	9705.45	8630.04	7536.32	8081.51	7921.63	25837.1	26544.5	21891	24353.8	19591.6	26350.6	6245.28	6511.68	6265.54	7265.04
NEG_10464	2.653	577.136	Procyanidin B1	[M-H]-	C30H26O12	Phenylpropanoids and polyketides	Flavonoids	C10221	0.715	1112.55	1694.16	690.496	2004	1957.74	1207.29	4498.99	4639.31	4238.89	3247.2	4816.1	4766.67	35273.8	37539.9	40016.8	38783.7	37663.3	3903.71	3736.97	2716.15	4088.09	2930.43	4161.83	6936.51	8487.59	8308.16	8480.5
NEG_8059	2.683	481.109	Apigenin-6-C-arabinoside-8-C-glucoside	[M-H]-	C25H22O10	Lignans, neolignans and related compounds	Flavonolignans		0.745	62094.3	261811	103590	130105	88854.5	49654.3	2339.62	1917.83	2247.82	2539.43	1927.77	1574.64	76200.1	62882	77686	112379	88510.2	41051.5	52897.6	34607.3	31748.6	33730.9	37615.9	13001.3	21692.2	18233.9	19189.4
POS_6081	2.684	429.204	Majdine	[M+H]+	C23H28N2O6	Organoheterocyclic compounds	Indolizidines		0.792	15854.2	15804.7	20877.9	15883.3	16034.5	15519.5	51032.7	46076.5	48334.3	48010.3	46852.9	52864.1	7813.52	8212.87	5604.31	7470.85	6403.86	16802.9	19208.3	17317	15296.6	14121.3	20003.1	23251.1	22807	22757.5	22753.7
POS_4537	2.701	361.09	5,7,3'-Trihydroxy-6,4',5'-trimethoxyflavone	[M+H]+	C18H16O8				0.749	4993.83	4562.47	5867.5	4425.66	4044.48	3967.16	5779.3	5388.84	5753.25	5215.01	5096.85	5003.59	141951	142534	173280	140930	187247	6239.91	6384.83	5433.32	5309.9	4778.12	5587.68	20949.8	21042.8	20853.8	21318
NEG_1262	2.703	191.055	Quinic acid	[M-H]-	C7H12O6	Organic oxygen compounds	Organooxygen compounds	C00296	0.848	21421.1	14147.7	18953.9	20975.8	17720.1	16586.7	23112	19285.9	20046.6	22453.3	19931.9	21153.8	289299	269586	374375	255057	505656	18271.4	20370.8	16457.5	16150.4	15893.1	19969.3	25188.1	27646.7	27117.2	27622.9
NEG_4388	2.704	337.092	Coumaroyl quinic acid	[M-H]-	C16H18O8	Organic oxygen compounds	Organooxygen compounds		0.881	105285	97502.3	105683	101590	88866.1	81460.9	103257	82709	91503.2	96781.1	90113.4	91591.7	1.66368e+06	1.53777e+06	2.11721e+06	1.45045e+06	2.87257e+06	81735.8	91592.9	78127.1	72239.7	67285.4	89469.7	128464	143241	140313	145243
NEG_479	2.705	137.026	3,4-Dihydroxybenzaldehyde	[M-H]-	C7H6O3	Organic oxygen compounds	Organooxygen compounds	C16700	0.903	143058	120267	165276	125118	104693	99804.2	78086.7	62261	65233.4	73384.3	65271.3	69061.9	52638	63860.2	70231.2	58666.2	99172.9	103605	106930	84750.6	87392.9	80654.7	114441	35980.3	41877.9	41877.3	41607.6
NEG_2313	2.719	250.07	N-Phenylacetylaspartic acid	[M-H]-	C12H13NO5	Organic acids and derivatives	Carboxylic acids and derivatives		0.758	81318.2	59752.2	100530	73066.2	62571.4	61235.4	8586.22	7722.57	7403.28	7577.25	7471.12	6495.66	71956.1	53181.7	88082.9	54401.6	146156	2219.42	2729.65	2056.94	2063.57	2322.85	2887.3	4160.5	4506.65	4582.55	4406.64
POS_3235	2.726	303.14	4-[Formyl(6-methoxyquinolin-8-yl)amino]pentanoic acid	[M+H]+	C16H18N2O4	Organoheterocyclic compounds	Quinolines and derivatives		0.83	10665.3	7761.08	10043.7	14050.2	9479.83	9626.19	26898.9	20124.6	31375.5	23289.5	23082.5	35503.6	13492.6	17524.4	20594.3	13315.7	12867.5	19428.6	19951.3	15597.7	22180.5	12451.4	21204.5	17962.1	14788.3	14787.2	15276.1
NEG_3122	2.726	285.041	6-Hydroxyapigenin	[M-H]-	C15H10O6	Phenylpropanoids and polyketides	Flavonoids	C10184	0.793	671502	1.21828e+06	694727	860495	789409	424084	25670.7	22376.6	19646.7	22854.8	21235.5	10681.9	226376	236013	394693	402259	872712	49074.1	74472.7	52726.2	40751.4	68122.7	53793.2	114065	167474	167268	158486
POS_3983	2.732	339.105	(3R,5R)-1,3,5-trihydroxy-4-[(E)-3-(4-hydroxyphenyl)acryloyl]oxy-cyclohexanecarboxylic acid	[M+H]+	C16H18O8	Organic oxygen compounds	Organooxygen compounds		0.885	4005.18	3429.66	2738.45	2348.58	695.445	3089.49	7335.42	5329.66	7527.21	7349.44	11807	8796.82	70642.4	64199	86424	62929.9	79541.8	9571.41	6156.14	13413.3	5599.06	12540.3	16557.8	14141	13515.8	14019.3	14138.5
POS_6508	2.745	449.109	Luteolin 7-galactoside	[M+H]+	C21H20O11	Phenylpropanoids and polyketides	Flavonoids		0.942	2.39483e+07	2.95249e+07	2.21761e+07	2.64781e+07	4.35565e+07	2.32125e+07	10914.6	12481.2	7462.87	5408.09	6557.14	2003.49	2.9542e+07	1.134e+07	3.14924e+07	4.23569e+07	2.88929e+07	216593	499267	422970	164827	424732	159434	8.82593e+06	1.21224e+07	1.0975e+07	1.10961e+07
POS_2508	2.748	261.134	Diaveridine	[M+H]+	C13H16N4O2	Benzenoids	Benzene and substituted derivatives		0.841	12241	9279.12	16668.9	21079.7	10699.4	15792.4	17118.5	3062.33	10176.5	16067.6	9606.56	13153.1	14787.3	9492.7	20855	11061.9	19189.7	14342.4	22502.5	20462.2	19804	19383.9	22622	32331.4	37363.6	33352.8	32284
POS_2946	2.748	287.05	Fisetin	[M+H]+	C15H10O6	Phenylpropanoids and polyketides	Flavonoids	C10041	0.839	637905	1.23037e+06	420113	627029	639757	625397	1134.09	1294.59	1204.98	1120.17	1120	1490.2	624206	255273	314789	359214	446207	7003.53	19346.7	13067.2	7492.51	16347.8	8192.09	155352	291281	240184	254931
NEG_4905	2.752	359.058	Skimmin	[M+Cl]-	C15H16O8	Phenylpropanoids and polyketides	Coumarins and derivatives		0.755	3922.89	2851.27	4638.1	5271.44	3176.14	5336.27	16011	13664.8	14744.9	15338.8	15414.2	14840.1	6949.96	7538.66	9943.72	6145.71	7208.15	5147.13	6442.55	5839.25	5403.28	4971.4	5798.22	3112.14	3263.23	3130.46	3498.09
NEG_3234	2.756	289.076	(-)-Epicatechin	[M-H]-	C15H14O6	Phenylpropanoids and polyketides	Flavonoids	C09727	0.894	7894.1	7434.99	2971.94	8351.68	6552.34	4163.58	318903	248829	284530	293639	290949	295006	96681.4	93988.7	104250	81198.5	116210	201866	199935	183860	187167	159875	208398	72233.6	82218.2	79824.4	84338.1
NEG_11221	2.761	613.178	3-{(E)-2-[4-(beta-D-Glucopyranosyloxy)-2-hydroxyphenyl]vinyl}-5-hydroxyphenyl beta-D-glucopyranoside	[M+FA-H]-	C26H32O14	Phenylpropanoids and polyketides	Stilbenes		0.788	351861	861185	222035	178568	371429	177669	8583.55	6121.33	6943.24	8085.27	6993.66	7622.06	157060	132342	162204	126711	108320	32515.7	46245.1	42171.3	7860.36	17251.2	22849.7	46405	75860	46750.8	50324.9
NEG_4140	2.763	327.105	Androsin	[M-H]-	C15H20O8	Organic oxygen compounds	Organooxygen compounds		0.749	20111.6	24527.9	20193.6	22139.1	21794.3	20023.8	22042.7	20909	20072.8	12737.5	20459.7	19286.3	42378.2	39498.2	40186	38081.6	50370.1	27708.2	33920.6	30138.8	27295	29311.9	31146.3	12983.2	13574.3	13616.4	13619.5
NEG_2388	2.766	255.03	Purpurin	[M-H]-	C14H8O5	Benzenoids	Anthracenes		0.773	157393	134467	192372	138188	144002	154405	424.982	334.081	183.604	219.427	107.113	144.585	65081.5	77299.2	73340.6	51561.6	62187.9	4499.92	6020.56	4630.03	3705.94	4140.08	5080.52	18998.6	23975.5	21824.9	22582.3
POS_6167	2.782	433.11	Pelargonidin-3-O-glucoside	[M]+	[C21H21O10]+	Phenylpropanoids and polyketides	Flavonoids		0.884	1.14311e+06	599497	1.03735e+06	115374	577164	119483	186.138	308.509	571.887	206.962	171.337	1033.55	651482	123332	1.60127e+06	623353	1.49947e+06	2930.33	3517.48	1923.51	949.642	1482.02	1268.75	202526	238397	171679	192852
NEG_10281	2.797	567.176	Mulberroside A	[M-H]-	C26H32O14				0.901	8257.7	7126.46	7814.15	8299.92	7087.51	8693.14	39157.5	30404.7	30849.3	33886.2	33905.6	37215.7	8862.39	5703.61	8794.87	6265.53	8335.25	8721.38	6769.36	7478.35	6070.43	5796.35	7472.18	5839.8	5250.62	5840.2	5837.99
POS_5615	2.813	409.11	Khelloside	[M+H]+	C19H20O10	Organoheterocyclic compounds	Benzopyrans		0.868	116365	99224.5	136667	113053	100782	100358	76961.4	58140.8	62787.9	65847.3	61538.1	63795.8	118132	133870	148771	112986	153107	88166.7	98353	80344.8	68023.5	63147.3	96223.6	83347.7	83359.3	82346.7	82328.4
POS_4926	2.82	377.085	Marticin	[M+H]+	C18H16O9	Phenylpropanoids and polyketides	Isochromanequinones		0.804	17468.6	15564.8	21820.3	15414	12738.3	15815.4	7408.59	5887.93	6135.83	6225.92	5843.39	6136.1	13888.5	11885.2	17905.2	11852.6	17457.7	6651.22	7666.53	6011.06	5899.89	6139.15	7505.36	6857.23	6711.67	7416.43	6119.48
NEG_1812	2.82	223.061	Sinapic acid	[M-H]-	C11H12O5	Phenylpropanoids and polyketides	Cinnamic acids and derivatives	C00482	0.786	36438.4	25536.5	35068	30106.7	32200.2	33074.7	14494.7	13139.1	12292.8	13117.2	13116.5	11968.2	30050.3	31452.7	28614.5	29380.2	32076.8	14257.2	17037.4	15537.8	13570.2	14620.8	19564.3	8599.3	9724.03	9492.03	9707.64
POS_4388	2.823	355.098	1-Caffeoylquinic acid	[M+H]+	C16H18O9	Organic oxygen compounds	Organooxygen compounds		0.775	6131.93	8390.3	9471.67	8247.29	7643.92	8597.61	7937.85	7772.87	7882.17	8705.06	8205.69	9749.31	8788.07	10729.4	10125.6	9038.56	10638.9	9419.76	9607.2	8434.08	8425.88	9878.87	10594.7	6172.61	6579.35	6576.17	6470.22
POS_5322	2.832	395.093	Diflufenican	[M+H]+	C19H11F5N2O2	Benzenoids	Benzene and substituted derivatives		0.703	114.597	3687.87	79.3123	3247.28	2729.86	5615.96	2164.49	2512.04	2840.84	2117.34	371.757	2533.03	32160.7	30166.6	28187.1	21773.1	27439.6	5418.85	6071.65	5462.49	4908.55	5121.65	5194.29	7683.78	137.39	7732.08	6970.51
NEG_6744	2.835	435.097	Irisxanthone	[M-H]-	C20H20O11	Organoheterocyclic compounds	Benzopyrans		0.772	1.49769e+06	936458	1.21883e+06	1.01726e+06	1.04753e+06	1.39255e+06	14901.3	13224.8	14148.5	14955.7	14080.4	14781.4	868306	1.04804e+06	901025	864016	856926	876436	945367	981678	769708	761269	890895	402561	406377	402629	419664
POS_5902	2.877	421.166	Morusin	[M+H]+	C25H24O6				0.806	8294.77	7398.49	5980.29	6536.92	6543.86	5740.77	8325.83	7291.21	7546.4	7915.6	7672.24	8229.84	2581.93	11960.4	3301.95	10510.5	2576.43	17172.4	16602.7	14559.2	15436.4	14867	17501.8	12943.2	13439.1	11971.4	13112
NEG_8379	2.889	493.153	2-(3,4-Dimethoxyphenoxy)-6-[(3,4,5-trihydroxyoxan-2-yl)oxymethyl]oxane-3,4,5-triol	[M+FA-H]-	C19H28O12	Organic oxygen compounds	Organooxygen compounds		0.71	13050.5	10528.2	7274.04	11035.4	10327.8	12252.3	7943.27	7053.26	8699.93	9037.91	8294.47	8360.34	5084.86	5129.36	5353.94	5067.31	5689.32	23642.7	21446.2	23156.9	21759.2	17056.6	21662.2	5605.23	5391.71	5109.41	6391.55
NEG_10780	2.903	593.152	Cyanidin 3-O-rutinoside	[M-2H]-	[C27H31O15]+	Phenylpropanoids and polyketides	Flavonoids	C08620	0.83	3.52475e+06	2.64816e+06	1.31575e+06	3.19684e+06	2.20327e+06	8.09934e+06	925.604	4946.66	638.007	631.72	1623.25	3035.17	1.82912e+06	936856	263145	1.75446e+06	1.07816e+06	45453.4	301114	201585	883744	90751.3	74162.7	176082	117842	367324	134478
POS_6910	2.907	467.188	5-[(1R,3S,5R,8S)-3-(beta-D-glucopyranosyloxy)-8-hydroxy-1,5-dimethyl-6-oxabicyclo[3.2.1]oct-8-yl]-3-methyl-, (2Z,4E)-2,4-pentadienoic acid	[M+Na]+	C21H32O10	Lipids and lipid-like molecules	Prenol lipids		0.83	64631	56108.9	68150.8	60994.5	54374.7	59428.7	55443.9	42356.9	46765.3	51542.3	47619.1	48838.7	190454	187785	194484	181795	233278	167907	179478	149600	150820	139910	180587	136324	136340	134952	134951
POS_5851	2.911	419.095	Cyanidin 3-arabinoside cation	[M]+	[C20H19O10]+	Phenylpropanoids and polyketides	Flavonoids		0.811	15491.7	21551.7	30194.4	10622.1	17125.6	13034.7	614.446	431.442	254.041	399.601	538.724	341.441	15685.3	18191	23442.3	20671.5	22279.4	1159.36	872.187	547.007	448.107	548.503	1911.19	4854.23	5013.4	3631.58	5007.86
POS_6223	2.919	435.179	Mundulone	[M+H]+	C26H26O6	Phenylpropanoids and polyketides	Isoflavonoids		0.82	4553.3	3789.63	5562.08	6200.61	4493.43	5316.96	16897.8	13463	13785.3	15283.8	11238.1	15458.4	33301.4	30661.4	31365	36180.2	31884.9	86313.1	84698.9	89277.9	90692.4	80449	98632.8	34817.4	34159.3	35817.2	34226.5
NEG_1080	2.92	179.036	Caffeic acid	[M-H]-	C9H8O4	Phenylpropanoids and polyketides	Cinnamic acids and derivatives	C01481	0.897	209926	130024	166741	174987	130708	195706	26340.3	23624.6	25171.7	24577	25743	25749.8	46400.9	47705.2	52984.8	37076.9	58267.8	21323.4	21461.5	21094.4	20406.7	16468.4	22903.7	20607	20603.8	20617.7	21913.6
POS_6169	2.922	433.112	Pelargonidin 3-glucoside	[M]+	C21H21O10	Phenylpropanoids and polyketides	Flavonoids		0.885	744802	304484	374214	1.42551e+06	450111	988194	1091.6	500.633	456.746	518.541	449.61	479.72	747015	1.19904e+06	2.76255e+06	168029	2.45102e+06	13811.6	13560.7	3093.03	4667.91	3736.83	12252.1	163708	249063	93339.9	136884
NEG_6958	2.922	443.22	Mitragynine	[M+FA-H]-	C23H30N2O4				0.705	4527.58	3944.47	3505.06	3195.97	4466.94	2872.64	5118.37	2491.07	3869.9	12435.5	2761.94	1740.47	6122.39	7306.01	11768.5	17572.2	3432.03	2677.15	6993.21	4419.38	2917.99	2491.82	5168.14	2024.31	2104.52	4148.22	2033.43
POS_6265	2.926	437.102	(5-Benzoyloxy-4,6-dihydroxy-3-methoxycyclohexen-1-yl)methyl benzoate	[M+K]+	C22H22O7	Benzenoids	Benzene and substituted derivatives		0.761	14714.4	15545.8	23044.9	19845	17618.7	20533.7	2269.84	1655.78	2054.79	2532.53	1714.09	2347.81	63597.4	58981.3	78425.6	61152.6	84410.8	22208.3	24542.1	19367.5	18519.4	18161.4	22167	22468.4	22714.6	22328.4	22336.7
POS_7157	2.926	479.11	Petunidin 3-glucoside	[M]+	C22H23O12	Phenylpropanoids and polyketides	Flavonoids	C12139	0.857	4850.05	6612.52	6152.74	4284.58	5068.93	6437.79	11887.8	8916.54	9086.32	9352.95	8948.95	9219.4	4145.69	6203.87	3224.05	4270.61	6708.82	20528.4	22803	20526.4	21218.4	19754	21914.2	11231.3	11422.3	11096.8	11132.6
NEG_5570	2.929	387.13	Laricin	[M+HCOO]-	C16H22O8	Organic oxygen compounds	Organooxygen compounds		0.73	14553.6	14244.8	18209.5	14738.9	12498.4	19314	26019.3	19915.7	31241.9	32368.2	18387.4	19432.4	15617.5	15565.4	17625	13507.1	20697.6	36565.2	32760.5	31953.4	32347.9	31428.7	39390.8	10476.7	9077.51	9679.17	9485.76
NEG_4434	2.932	339.071	Esculin	[M-H]-	C15H16O9	Phenylpropanoids and polyketides	Coumarins and derivatives		0.849	68724.8	60299.8	38136.7	71500.6	60898.2	73180.9	45481.4	33114.7	39665.3	41114.9	37683.1	39102.5	53927.2	50299.3	51154.2	37284.3	46938.6	74160.2	69426.2	70890.6	71115.8	62320.9	70692.1	28146.7	28153.9	28177.6	30669.7
NEG_4146	2.945	327.112	1-(4-Hydroxyphenyl)-3-[(2R,3R,4S,5S,6R)-3,4,5-trihydroxy-6-(hydroxymethyl)oxan-2-yl]oxypropan-1-one	[M-H]-	C15H20O8	Lipids and lipid-like molecules	Fatty Acyls		0.75	12563.5	6428.04	7555.96	6677.24	7602.47	8727.96	43694	31929	37893	39108.2	36542.9	39365	78620	79692.5	93812.3	72862.2	98791.3	35317.9	30699.7	39465	52016.5	30273.8	31666.4	20544.9	21780.8	21365.4	23135.6
NEG_559	2.946	147.048	p-Coumaraldehyde	[M-H]-	C9H8O2	Phenylpropanoids and polyketides	Cinnamaldehydes		0.786	7189.9	5745.7	7517.37	6192.18	5967.57	5824.07	16550.2	10920.9	13337.8	13652.8	12935.9	13231.4	28547.7	29784.1	36601.3	28031	41466	18764.7	19854.5	18668.5	18610.5	14943.9	19203.8	8864.48	9202.83	9130.74	9201.62
POS_9778	2.949	595.181	Quercetin 3,7-dirhamnoside	[M+H]+	C27H30O15	Phenylpropanoids and polyketides	Flavonoids		0.811	1.24049e+06	615573	4.88544e+06	920221	1.06659e+06	1.92176e+06	4762.74	1927.52	2325.15	1798.82	3102.37	2608.07	1.19067e+06	573937	807412	342046	983493	121535	130148	82321.5	28687.3	24075.1	45156.9	454159	363128	345816	375929
POS_9360	2.958	575.169	2-Methoxy-4-[tetrahydro-3a,6a-dihydroxy-4-(4-hydroxy-3-methoxyphenyl)-1H,3H-furo[3,4-c]furan-1-yl]phenyl-beta-D-glucopyranoside	[M+Na]+	C26H32O13	Lignans, neolignans and related compounds	Lignan glycosides		0.727	9987.69	10222.1	11872.6	11286.1	11019.8	11953.6	40597.1	30548.8	34983.1	34763.6	33972.5	32920.9	5919.11	5933.11	6960.78	5270.43	7224.38	2292.52	4602.86	5283.12	2164.36	4790.51	1796.2	10175.8	9017.54	9205.58	9006.44
POS_6966	2.977	469.164	[8-[2-(3-Methylbutanoyloxy)propan-2-yl]-2-oxo-8,9-dihydrofuro[2,3-h]chromen-9-yl] 3-methylbutanoate	[M+K]+	C24H30O7	Phenylpropanoids and polyketides	Coumarins and derivatives		0.816	1150.94	2008.94	2038.16	2725.5	868.523	2384.8	6060.54	5297.35	5938.63	5595.92	6076.03	6209.96	8979.05	4998.78	5976.71	5956.51	5155.98	33644.3	34700.2	34993.8	35354.4	35238.1	32589.1	14496.1	14351.4	13794.7	14496.6
POS_10537	2.984	637.165	2-(beta-D-Glucopyranosyloxy)benzyl-3-(hexopyranosyloxy)-6-hydroxy-2-methoxybenzoate	[M+Na]+	C27H34O16	Organic oxygen compounds	Organooxygen compounds		0.735	33250.7	104564	49405.1	30852.7	64229.3	29644.1	8050.47	7250.31	7247.82	7356.08	8492.15	8065.55	26820.5	20687.2	12403.1	28140.1	13390.6	20572.5	21585.3	21360.5	19590.7	21994	19698.1	23204	31766.7	17159.5	26555.5
NEG_1184	2.993	183.03	Methyl gallate	[M-H]-	C8H8O5	Benzenoids	Benzene and substituted derivatives		0.858	124434	97413.7	139850	131171	106108	112514	1662.38	1410.51	2333.86	1968.83	1256.08	1769.38	40489.6	34975.1	50442.8	33727.8	50952.4	5750.51	5620.42	4398.55	4435.87	1884.01	5332.82	12010.9	13518	13265.4	13588.9
NEG_11723	2.995	639.155	Rhamnetin 3-sophoroside	[M-H]-	C28H32O17	Phenylpropanoids and polyketides	Flavonoids		0.717	386814	195073	651713	459814	585175	282213	1641.64	1304.4	1574.75	1225.02	1591.73	1728.92	131523	61640.6	122369	113852	46970.6	83646	121353	108392	83983.9	85238.7	112850	66096	63636.7	71974.9	51904.6
POS_1357	3.002	193.048	Isoscopoletin	[M+H]+	C10H8O4				0.928	47891.1	43286.7	54632.6	46717.6	46568.8	46232.1	18741	15924.5	15926.3	16070.2	15619.7	16334.5	36348.6	31503.8	41146	36764.6	44804.1	22303.3	24545.7	19093.5	17174.6	17893.1	24128.8	23238.9	23377	23239.5	24064
NEG_1260	3.004	191.035	Scopoletin	[M-H]-	C10H8O4	Phenylpropanoids and polyketides	Coumarins and derivatives	C01752	0.895	60696.5	56804.8	72516.4	73098.6	59483.8	57648.8	40239.5	27212.1	33964.9	36339	32683.4	35904.9	44741.8	35064.3	48887.2	34257.8	42814.6	29837	34208.2	36812.6	26081.1	26464.2	28313.5	18711.5	21389.9	20865.2	22216.1
NEG_5852	3.006	399.095	Scopolin	[M-H]-	C16H18O9	Phenylpropanoids and polyketides	Coumarins and derivatives		0.866	68405.9	54430.4	71536.3	70697	62056.2	58916.2	24957.4	21744.1	24018.1	23849.5	24028	24469.1	53166	44214.1	51930.4	40543.5	52777.5	31460.8	27078.9	32288.9	28956.7	26597.3	29773.6	16663.7	15215.6	16663.4	16488.1
POS_7497	3.016	493.169	6-[2-Hydroxy-3-methyl-3-[(2S,3R,4S,5S,6R)-3,4,5-trihydroxy-6-(hydroxymethyl)oxan-2-yl]oxybutyl]-5,7-dimethoxychromen-2-one	[M+Na]+	C22H30O11	Lipids and lipid-like molecules	Fatty Acyls		0.8	5000.02	3944.88	4766.9	4561.04	4127.67	4825.64	10582.6	8437.08	9632.34	8894.11	9461.14	9803.61	19541.3	19049	20158.9	17752.8	19557.2	13201.1	13943	13947.1	13485.6	12117.9	12121.1	11562	8746.37	11488	11563.3
POS_9072	3.019	561.188	2-[4-[4-[Hydroxy-(4-hydroxy-3-methoxyphenyl)methyl]-3-(hydroxymethyl)oxolan-2-yl]-2-methoxyphenoxy]-6-(hydroxymethyl)oxane-3,4,5-triol	[M+Na]+	C26H34O12	Lignans, neolignans and related compounds	Lignan glycosides		0.805	3066.04	3517.03	2297.42	3332.41	2653.33	2588.31	14468.9	11714.7	10460.5	12946.9	11851.1	11985	7870.13	7526.96	7078.98	7819.84	7219.04	29286.3	30760.4	25972.1	27993	24346.2	30423.9	10308.3	11655.9	10818.3	10973
NEG_5076	3.024	367.103	4-O-Feruloylquinic acid	[M-H]-	C17H20O9	Organic oxygen compounds	Organooxygen compounds		0.74	12205.7	10505.3	13896.7	9922.5	9325.67	11699.4	22331.8	15812.2	18600.8	20400.2	19627.2	20238.5	30782.5	21554.2	33096	23070.4	33360	8342.9	8943.35	12136.3	8644.95	7434.69	8357.37	5532.33	5583.91	5327.69	5734.17
POS_7249	3.062	483.147	Paeonolide	[M+H]+	C20H28O12				0.79	997.853	724.556	759.196	960.72	653.505	996.937	2170.55	530.06	953.498	854.369	803.881	1389.36	17808.1	17422	20190.9	19594.7	21911.1	26442.9	28684.9	23760.6	23804.4	27014.2	34727.2	11759.1	12424.4	12099	11140.8
NEG_4870	3.069	357.119	3-(2-Glucosyloxy-4-methoxyphenyl)propanoic acid	[M-H]-	C16H22O9	Organic oxygen compounds	Organooxygen compounds		0.773	24962.3	21440.4	26049.7	25112.9	22195.9	18319.1	8053.53	7669.58	8038.31	8562.45	7738.49	7797.15	104988	72996.1	87825	71050.5	84902	32921.5	36406.4	36906.5	32227.2	29160.4	32828.7	15022.7	15201.2	15027	15828.7
NEG_1229	3.079	189.076	3-Hydroxysuberic acid	[M-H]-	C8H14O5	Organic acids and derivatives	Hydroxy acids and derivatives		0.847	77960.5	71132.9	86082.6	83564.2	76143.5	68685.5	7290.2	5503.52	6769.53	7011.74	6185.88	6655.49	139710	94568	120256	93184	137866	8674.32	11843.4	9615.19	8618.16	7335.24	8739.51	7441.23	8171.52	7938.18	8589.17
NEG_6370	3.099	421.081	Mangiferin	[M-H]-	C19H18O11	Organoheterocyclic compounds	Benzopyrans		0.809	156987	131915	149778	157788	141949	139062	4117.2	6046.68	5290.6	3885.52	6255.1	6202.3	50579	42989.1	42968.3	41421.8	59444.7	17807.3	17085.4	15360.8	12388.8	13909.1	14044.6	19574.1	21193.6	18209.1	19874
NEG_3581	3.102	305.067	Sulfo jasmonate	[M-H]-	C12H18O7S	Lipids and lipid-like molecules	Fatty Acyls		0.826	9076.47	7857.81	11420.4	9106.47	6207.48	7242.7	6248.41	7823.39	8263.74	9133.81	8520.11	8700.1	219298	151782	211650	145178	288045	14224.4	15099.3	13314	12742.3	11987.1	16575.8	7780.21	8556.22	8344.93	9000.73
POS_6964	3.131	469.132	Sucrose 6-benzoate	[M+Na]+	C19H26O12	Organic oxygen compounds	Organooxygen compounds		0.784	4063.46	3801.38	5366.06	3782.48	3822.46	4858.42	2787.67	2030.44	1605.83	2367.33	2166.15	2235.27	13161.5	13044.2	13436.4	13526.9	13541.9	740393	799440	556001	569480	477626	876687	181849	180232	180225	180223
NEG_10776	3.136	593.149	Biorobin	[M-H]-	C27H30O15	Phenylpropanoids and polyketides	Flavonoids		0.912	2.14442e+06	5.26084e+06	8.86535e+06	1.81961e+07	5.39265e+06	1.501e+07	1204.08	2564.64	685.743	1166.81	1834.31	414.082	6.92495e+06	2.86996e+06	893449	3.82036e+06	4.98593e+06	542515	651558	713211	655788	1.05569e+06	682267	888235	577120	1.52165e+06	711250
NEG_10900	3.138	599.102	3'-Galloylquercitrin	[M-H]-	C28H24O15	Phenylpropanoids and polyketides	Flavonoids		0.733	118646	86593.9	129555	106857	85598.5	112395	1611.84	1797.49	1394.43	707.52	1494.24	1864.17	102870	76799	87543.5	73254.7	136090	25348.6	14551.6	17067.4	25095.2	23018.3	19445	21929.3	21979.5	11263.1	21938.8
NEG_7122	3.141	449.104	3,5-Dihydroxy-2-(4-hydroxyphenyl)-7-[3,4,5-trihydroxy-6-(hydroxymethyl)oxan-2-yl]oxy-2,3-dihydrochromen-4-one	[M-H]-	C21H22O11	Phenylpropanoids and polyketides	Flavonoids		0.893	874215	816650	791635	635952	573138	688169	147815	105827	126923	141135	129162	133433	461880	690409	396630	726288	973482	143032	142174	133943	146138	126426	183930	360860	403240	329803	429161
POS_4389	3.153	355.098	Staphylin	[M+H]+	C16H18O9	Organic oxygen compounds	Organooxygen compounds		0.836	2512.79	1105.65	1538.47	2295.41	2024.04	1078.66	2171.85	732.832	2170.87	1757.99	1792.41	1856.3	7310.8	7115.99	8814.88	7169.7	8930.6	15361.6	16456	14921.2	13611.8	13613.9	17406.6	4654.93	4938.37	4655.32	4688.74
POS_6080	3.154	429.203	4-Hydroxy-6-methyl-3-methylidene-5-[5-[(2R,3R,4S,5S,6R)-3,4,5-trihydroxy-6-(hydroxymethyl)oxan-2-yl]oxypentan-2-yl]-3a,4,7,7a-tetrahydro-1-benzofuran-2-one	[M+H]+	C21H32O9	Lipids and lipid-like molecules	Prenol lipids		0.834	26142.7	25892.7	24434.8	26252.2	26016.5	26139.9	9712.68	8018.48	11115.7	9825.97	8321.39	10085.7	9684.92	9000.3	9288.27	7184.51	9299.02	27639.2	29030.5	24814.3	27296.5	25429.6	30707.3	17539.1	18385.8	17655.2	18031.8
NEG_14415	3.156	797.214	[3,4-Dihydroxy-6-[5-hydroxy-2-(4-hydroxyphenyl)-4-oxo-7-[3,4,5-trihydroxy-6-(hydroxymethyl)oxan-2-yl]oxychromen-3-yl]oxy-5-[(2S,3R,4R,5R,6S)-3,4,5-trihydroxy-6-methyloxan-2-yl]oxyoxan-2-yl]methyl acetate	[M-H]-	C35H42O21	Phenylpropanoids and polyketides	Flavonoids		0.855	21831.5	18544.5	26806.4	22410.8	20783	26298.1	4135.03	3843.47	3675.7	2086.5	4124.31	4360.25	10417.8	10046.4	9928.82	8577.83	19387.6	2627.73	1762.72	1782.44	2241.81	1910.25	2598.1	2573.18	2653.67	2105.4	2632.19
NEG_6571	3.169	429.139	5-{[4-(beta-D-Glucopyranosyloxy)benzyl]oxy}-3-hydroxy-3-methyl-5-oxopentanoic acid	[M-H]-	C19H26O11	Organic oxygen compounds	Organooxygen compounds		0.788	39044.4	36365	46322	38684.6	39076	42819.5	25580	22135.6	24995	26615.5	25869.6	24779	86347.1	71775.9	74752.6	64879.2	131846	1.419e+06	1.62297e+06	1.29526e+06	1.36549e+06	1.2322e+06	1.91158e+06	145510	151035	144830	156543
NEG_5086	3.17	367.16	Dehydroepiandrosterone sulfate	[M-H]-	C19H28O5S	Lipids and lipid-like molecules	Steroids and steroid derivatives	C04555	0.731	470.467	1715.53	716.016	814.352	1667.09	1972.33	1384.59	1258.5	1740.54	1018.09	519.017	654.697	2366.11	1618.66	2609.91	1732.73	1281.74	33146.9	33970.4	28415.9	31031.8	27608.3	44313	4349.97	4450.44	4299.48	4934.4
POS_6356	3.18	441.132	Ginkgolide C	[M+H]+	C20H24O11				0.739	462.074	386.908	585.461	1101.97	1028.57	1172.32	4547.65	3102.4	4086.1	1288.58	1149.76	1765.15	13321.2	14350.9	13866.4	11918.4	14379.7	212187	227050	185022	199267	184475	228258	49369.1	49370	46691.1	49372.2
POS_6847	3.186	465.103	Delphinidin 3-glucoside	[M]+	[C21H21O12]+	Phenylpropanoids and polyketides	Flavonoids		0.855	86940.4	74409	57649	101396	109057	75036.9	4437.08	6114.36	2301.26	3399.53	2276.66	4132.27	60765.3	52091	40094.2	55668	44213.9	13134.2	13856.5	15197.7	19154.5	19103.6	13516	24404.4	24481.2	26243.9	25783.2
NEG_1055	3.194	177.02	Esculetin	[M-H]-	C9H6O4	Phenylpropanoids and polyketides	Coumarins and derivatives	C09263	0.952	142243	131262	176510	139669	156284	151240	117333	98904	107260	113819	107874	108198	116297	93680	116294	87639.7	165907	61017.9	68027.7	56836.9	59272.5	54688.6	76609.7	54739.9	54975.9	54427.3	56126.2
POS_5684	3.2	411.099	3-O-Methylfunicone	[M+Na]+	C20H20O8	Organic oxygen compounds	Organooxygen compounds		0.75	3444.47	3466.02	2742.87	2799.37	2765.23	3263.97	14132.6	10651.8	11567.4	11194.2	10894.1	12095.4	7646	8985.62	9486.54	8442.91	9338.66	43209.1	46259.2	40658.5	45017.9	44053.7	46168.3	10675.9	10701.8	10495.1	10618
POS_1361	3.2	193.084	Myristicin	[M+H]+	C11H12O3	Organoheterocyclic compounds	Benzodioxoles	C10480	0.749	5467.25	4399.59	4447.12	4286.51	3820.45	4246.62	4089.09	3074.73	3814.97	3489.42	4141.14	3673.52	7623.72	8367.95	10063.8	8456.82	12456.2	22499.5	22427.8	21299.6	19645	18774.4	23709.1	7627.77	7101.01	7470.39	7544.77
POS_5327	3.201	395.13	Syringin	[M+Na]+		Organic oxygen compounds	Organooxygen compounds		0.792	42669.9	38207.1	43094.7	39858.2	38148.7	37731.7	40526.1	27478.4	35761.2	34049	33865.4	35323	86754.6	81211.8	100597	82982.6	96319.8	333853	360879	294415	308966	287328	375182	94532.4	94560.4	90303.5	93413.4
NEG_5573	3.203	387.163	12:4+3O Fatty acyl hexoside	[M-H]-	C18H28O9	Lipids and lipid-like molecules	Fatty Acyls		0.704	6634.53	6282.97	7266.98	4721.48	6664.19	7107.52	4572.77	4359.2	3340.68	2493.3	4126.78	4350.02	9867.59	7933.25	12847.1	7040.82	15029.6	6377.24	5550.08	5610.82	5279.22	4868.73	7385.64	2556.25	2669.99	1691.16	2663.88
NEG_6266	3.245	417.085	Kaempferol-3-O-arabinoside	[M-H]-	C20H18O10				0.702	4805.4	10749.8	25819	7640.24	14576.9	18108.6	415.496	293.823	297.759	224.451	530.115	348.766	6102.54	6566.92	5400.23	892.636	8634.54	2774.25	3061.56	3890.71	3706.38	4009.61	2645.72	3066.93	2861.39	2450.54	3810.26
NEG_10785	3.284	593.18	isosakuranetin-7-O-rutinoside	[M-H]-	C28H34O14				0.762	124537	187846	34554.4	98751.1	216922	48803.5	838.774	1048.2	1057.58	1940.67	702.895	446.491	35061.4	15542.6	29649.4	84510.4	27733.7	14447.6	20290.5	16214.8	16367.5	29011.3	12934.4	17930.3	20334.3	39518.3	20608.5
NEG_11127	3.347	609.18	5-Hydroxy-2-(3-hydroxy-4-methoxyphenyl)-7-[(2S,3R,4S,5S,6R)-3,4,5-trihydroxy-6-[[(2R,3R,4R,5R,6S)-3,4,5-trihydroxy-6-methyloxan-2-yl]oxymethyl]oxan-2-yl]oxy-2,3-dihydrochromen-4-one	[M-H]-	C28H34O15	Phenylpropanoids and polyketides	Flavonoids		0.787	31685.5	38969.7	40900.2	25222	20737.2	31321.2	1712.4	868.444	902.788	437.05	268.437	301.015	19855.2	25801	34194.2	20386.9	43289.7	4141.03	5715	4129.86	2934.07	5989.21	9317.38	13821.1	15332.9	16658.7	6558.53
NEG_337	3.347	121.03	Hydron;benzoate	[M-H]-	C7H6O2	Benzenoids	Benzene and substituted derivatives		0.846	13827.1	13690.9	12644.5	10496.2	9606.02	8519.49	33245.5	25691.4	28840.2	25355.7	23885	31391.4	18498.1	18361.2	28534.9	21005.5	20290.5	36627.1	34140.3	29252.9	33345.6	28751.6	37041.3	13874.1	13301.9	13875	13874.4
NEG_5518	3.351	385.115	1-O-Sinapoyl-beta-D-glucose	[M-H]-	C17H22O10	Phenylpropanoids and polyketides	Cinnamic acids and derivatives		0.891	229322	267663	274831	236324	239948	245954	21105.7	19407.8	21210.1	19598	19576.8	21561.8	175008	162158	209866	189817	163743	35552.1	36608.8	37246.9	36640.7	33686.6	38291.8	59623.7	64302.9	61972.9	64214.1
POS_5685	3.366	411.13	Phenyl 6-O-[(2R,3R,4R)-3,4-dihydroxy-4-(hydroxymethyl)tetrahydro-2-furanyl]-beta-D-glucopyranoside	[M+Na]+	C17H24O10	Organic oxygen compounds	Organooxygen compounds		0.837	32732.3	35981.3	41482.4	33708	37706.5	35880.3	16535.6	11451.6	14161.3	14570.8	13108.7	14277.1	41962.9	37514.8	46597.4	45384.3	45571	22014.2	23830.9	20323.7	18444.3	15309.2	24912.1	26503.3	27229.1	23163.1	26953.3
NEG_14254	3.369	785.254	[4-[4,5-Dihydroxy-6-methyl-3-[3,4,5-trihydroxy-6-(hydroxymethyl)oxan-2-yl]oxyoxan-2-yl]oxy-6-[2-(3,4-dihydroxyphenyl)ethoxy]-3,5-dihydroxyoxan-2-yl]methyl (E)-3-(3,4-dihydroxyphenyl)prop-2-enoate	[M-H]-	C35H46O20	Organic oxygen compounds	Organooxygen compounds		0.741	3472.91	3709.42	3036.82	3087.47	4296.03	3131.86	2380.67	2274.24	2057.86	1408.08	2314.43	1976.93	7079.38	7996.43	6239.89	8541.54	5607.05	7965.27	8640.72	7330.07	7347.97	5989.6	8501.62	3576.42	3575.67	3577.06	3163.95
POS_4210	3.389	349.125	Camptothecin	[M+H]+	C20H16N2O4	Alkaloids and derivatives	Camptothecins		0.754	307834	293989	312411	309269	295921	293533	7963.57	6331.24	6949.1	6726.77	7032.36	8181.77	331159	337999	337684	346219	359373	35176.3	38062.5	33662.7	31744.6	31901	37603.6	144220	149694	148122	148636
POS_4619	3.391	365.102	Sucrose	[M+Na]+	C12H22O11	Organic oxygen compounds	Organooxygen compounds	C00089	0.94	98511.3	98255	106238	113269	115892	96466.9	134288	57756.5	89398	58965.1	40079.9	91577.7	185642	208960	237251	176253	179295	125910	111367	88872	90374.6	49759.4	118393	181870	190170	178168	178144
POS_2357	3.395	252.133	Dimethachlor OXA	[M+H]+	C13H17NO4	Organic acids and derivatives	Carboxylic acids and derivatives		0.74	9293.79	10250.6	8774.92	8945.23	13037.7	9404.32	21245.4	12962.4	19481.8	16244.7	13488.8	3983.23	12738	10503.5	21367.8	15532.5	33152.7	7331.43	11710.8	13131.7	3759.87	10791.6	8159.26	13478.3	20193.2	13801.9	13232.2
NEG_3233	3.407	289.073	Cianidanol	[M-H]-	C15H14O6	Phenylpropanoids and polyketides	Flavonoids	C06562	0.782	45206.6	43518.8	44246	47227.7	42303.2	44314.5	59191.1	51736.5	56899.3	55240.3	55299.6	56183	133491	126546	163429	130449	134490	24768.1	26154.1	23485.3	24049.6	22129	27133.4	36443	39459.9	37968.8	42074.5
POS_9695	3.429	591.165	5-Methoxy-3-methyl-4-[(2S,3R,4S,5S,6R)-3,4,5-trihydroxy-6-[[(2R,3R,4S,5S,6R)-3,4,5-trihydroxy-6-(hydroxymethyl)oxan-2-yl]oxymethyl]oxan-2-yl]oxy-3H-benzo[f][2]benzofuran-1-one	[M+Na]+	C26H32O14	Organic oxygen compounds	Organooxygen compounds		0.754	2598.8	2820.78	3105.38	2871.75	2675.66	2351.94	30653.4	22097	28447.7	30034.3	27031.2	28401.9	7450.98	7686.78	9787.02	7474.8	9838.62	6674.46	6703.41	5868.96	5857.14	5158.16	6552.33	16208.7	16551.2	16230.4	16208.8
NEG_12450	3.433	681.173	Peonidin 3-(6''-acetyl)glucoside	[M-H]-	C32H42O16	Lignans, neolignans and related compounds	Lignan glycosides		0.738	9433.92	15174.8	4527.03	4549.91	16273.4	4448.44	27188.6	29134.8	22576.2	25212.1	23780.9	23310.7	6274.4	8821.11	6245.12	7204.84	3951.49	3601.32	5667.94	5727.01	4301.59	5411.82	4583.09	8773.39	10232	10864.3	9753.89
POS_3501	3.457	317.155	Bupirimate	[M+H]+	C13H24N4O3S	Organoheterocyclic compounds	Diazines		0.739	8393.63	9204.87	9946.69	9719.82	7264.49	8036.31	9774.4	7519.47	9060.93	9354.4	8749.5	9724.47	7003.4	6668.95	8887.6	6711.68	9666.36	7536.53	6815.87	6683.89	6165.18	4862.13	6095.99	6503.17	6505.25	5844.34	6505.32
POS_5686	3.467	411.161	2-[(2Z)-5-(Hexopyranosyloxy)-2-penten-1-yl]-3-oxo-, (1R,2R)-cyclopentaneacetic acid	[M+Na]+	C18H28O9	Lipids and lipid-like molecules	Fatty Acyls		0.831	37833.8	26311.3	38059.9	30728.5	24919.8	30962.4	10793.7	7863.04	10501.6	8833.58	9382.37	9624.64	31654.9	29000.1	42203	27886.8	42264.3	10874.5	11384.7	9143.55	9108.53	8164.98	20949.9	17383.7	17315.6	17135.5	17136.6
NEG_1088	3.473	179.057	D-Glucose	[M-H]-	C6H12O6	Organic oxygen compounds	Organooxygen compounds	C00221	0.769	4437.72	2896.28	13474.9	17342.2	4136.67	10555.6	10768.9	9258.69	9225.66	6890.46	6616.9	9763.83	6729.94	17946.9	7220.31	12693.9	20393.9	22741.4	6315.62	25305.7	9852.26	9275.13	19546	4549.26	4550.39	4706.98	4628.13
POS_7253	3.476	483.186	4-(4-Hydroxyphenyl)-2-butanyl 6-O-[(4xi)-alpha-L-threo-pentofuranosyl]-beta-D-glucopyranoside	[M+Na]+	C21H32O11	Lipids and lipid-like molecules	Fatty Acyls		0.86	31763.9	22854.2	25927.8	31450.8	23280	29633.6	6710.42	5909.28	3685.34	2498.31	4616.72	3392.71	15022.6	14003.7	15417.3	13204.8	14371.8	2470.22	2612.07	2490.52	2451.55	2154.89	2384.38	9869.9	9359.91	8068.17	10367.4
POS_4105	3.482	344.225	Hydroxybutorphanol	[M+H]+	C21H29NO3	Benzenoids	Phenanthrenes and derivatives		0.806	120088	98748.2	116977	98376.8	96008.2	95100.5	93267	84967.2	94401.5	92007.2	89326.9	132101	85911.1	120652	95716	87332	97137.7	129074	88321.2	84729	107391	72907.5	128393	141642	131917	134167	130150
POS_4212	3.485	349.184	Imidocarb	[M+H]+	C19H20N6O	Benzenoids	Benzene and substituted derivatives		0.81	11400.9	12098.2	13194	10292.3	11889.4	10436.9	8810.51	7244.34	6486.34	6796.78	6154.38	8846.68	9818.32	12145.7	11259.3	11010.9	10933	10622.8	7182.35	7461.06	9995.41	7475.48	11730.9	11636.7	12726.3	11808.1	11641.8
POS_5017	3.488	381.077	(7E,13E)-9,15-Dihydroxy-4,10,16-trimethyl-1,5,11-trioxacyclohexadeca-7,13-diene-2,6,12-trione	[M+K]+	C16H22O8	Phenylpropanoids and polyketides	Macrolides and analogues		0.774	9777.93	7232.94	6566.36	6617.49	9633.44	7713.15	28071.5	18965.6	26106.2	20589.6	24198.9	17751.3	11535.5	11042.8	17449.2	9638.4	11901.3	14514.7	14138.6	11655	14579.4	7992.08	18973.5	14776.5	12425.6	15093.2	9379.52
NEG_5790	3.505	397.074	Propoxycarbazone	[M-H]-	C15H18N4O7S	Benzenoids	Benzene and substituted derivatives		0.765	1668.7	1951.85	2266.99	1491.45	1907.05	2355.57	4110.6	3469.13	3462.43	2957.87	3669.44	3837.27	27480.2	34758.3	28867.2	31806.5	28874.9	4109.09	4228.74	3367.99	3331.23	3029.1	4065.9	5738.66	5738.73	5696.87	5500.59
NEG_3386	3.515	296.08	5'-Deoxy-5'-methylthioadenosine	[M-H]-	C11H15N5O3S	Nucleosides, nucleotides, and analogues	5'-deoxyribonucleosides	C00170	0.819	3922.72	4569.62	4353.35	4754.98	4393.04	4610.41	6084.29	5843.49	5456.81	5841.97	5986.27	6000.21	7036.72	6895.86	6371.46	6199.36	6420.17	4361.2	4545.75	4691.43	5165.07	4718.61	5068.56	2967.89	2970.8	3124.57	3056.52
NEG_10467	3.52	577.154	Rhoifolin	[M-H]-	C27H30O14	Phenylpropanoids and polyketides	Flavonoids		0.827	97138.1	83556.5	87577.9	92656.6	90408.8	102687	601.944	559.898	483.543	776.763	366.377	616.192	131281	134590	131718	121117	136416	7034.39	6422.57	8060.88	6987.56	6402.39	6317.72	34111.7	28904.3	37068.5	33006.5
NEG_7056	3.54	447.096	Astragalin	[M-H]-	C21H20O11	Phenylpropanoids and polyketides	Flavonoids	C12249	0.739	160537	189817	708529	180529	185307	171686	48040.9	39798.6	34652.4	39403.3	35049.9	34507.2	257507	244856	121412	231730	324248	15986.4	23368.7	16983.5	15515.1	14736.6	15979.3	71290.3	75130.4	78379	60321.1
POS_9631	3.543	587.188	Benzyl 2-O-(D-apio-beta-D-furanosyl)-3-O-(beta-D-glucopyranosyl)-beta-D-glucopyranoside	[M+Na]+	C24H36O15	Organic oxygen compounds	Organooxygen compounds		0.775	3566.65	2770.76	3445.67	3594.82	563.644	3152.64	5196.24	4154.74	5867.58	5541.84	5474.48	5434.25	21998.8	21192.4	25138.3	16896.8	25172	19067.4	19489.2	13992.8	18591.4	10975.8	20128.7	13846.7	12915.8	14081.7	13149.5
POS_6430	3.547	445.18	Tetracycline	[M+H]+	C22H24N2O8	Phenylpropanoids and polyketides	Tetracyclines		0.848	20762.7	17903	22444.6	21261	18907.6	21320.6	15521.8	13680.9	14057.6	12812.2	13116.2	13840.6	18860.8	17938.2	24262.4	17628.6	18469.8	26823.8	27857.1	26734.7	25235.9	25224.1	29235.7	15098.8	14841.5	15305.8	14124
NEG_10621	3.548	583.204	Tanegoside	[M+HCOO]-	C26H34O12	Lignans, neolignans and related compounds	Lignan glycosides		0.802	19769.6	24721.9	21299.1	21804.3	24400.6	23330.6	19083.3	17067.6	20510.3	14130.4	17031.9	22536.3	31079.4	31981	35920.7	36352.3	31321.3	29991.1	24401.9	31650	34718.8	34106	32415	12003.4	14508.4	12639.1	13614.6
NEG_11124	3.553	609.152	Luteolin-7,3'-di-O-gflucoside	[M-H]-	C27H30O16	Phenylpropanoids and polyketides	Flavonoids		0.861	67172.2	63926.7	57262.6	60616	49554.5	61931.8	101409	81280.6	90239.6	100658	88893.1	89451.4	74891.6	72765.3	81525.5	66983	80760.1	19184.9	18359.1	16345.3	16013.3	14943	18459.4	27332.6	31609.9	30368.9	30931.8
POS_3037	3.557	293.1	Norcimifugin	[M+H]+	C15H16O6				0.795	62036.7	48932.7	65408.1	57335.5	55349.3	58517.8	83717.8	72375.9	77691.9	71441.1	72272.2	76312.9	146650	139619	154720	134656	160670	7264.94	7992.97	6932.61	5894.44	6470.71	8228.53	54825	54484.2	53226.1	54823.7
NEG_5993	3.574	405.12	Astringin	[M-H]-	C20H22O9	Phenylpropanoids and polyketides	Stilbenes	C10245	0.893	87739.3	93380.4	84348.9	100114	88403.5	91311.5	67144.7	56419.5	61463.8	64065.4	59315.5	61429.3	61515.5	58208	57416.1	55774.4	57634.1	35888.1	35087.5	33967.3	36486.6	30329.3	37054.5	32343.8	35719.2	34360.1	37042.5
POS_7767	3.579	505.129	Catalposide	[M+Na]+	C22H26O12	Organic oxygen compounds	Organooxygen compounds		0.747	76841.7	63594.5	91214.3	72021.3	64740.8	68890	27564.8	24491.2	25086.8	23708.6	25032.7	24639.6	61054.8	57720.5	63690.4	53592.4	71791	12468	13011.4	10204.2	10090.2	9977.73	13172.8	25163.7	25167.7	26757.6	25326.2
POS_4705	3.583	368.168	Jacobine N-oxide	[M+H]+	C18H25NO7	Alkaloids and derivatives			0.792	15434.2	10350.5	16420.6	13856.2	12824.7	13242.5	7281.97	7775.26	6048.42	7743.21	8089.55	8408.07	2576.67	2208.49	2628.09	2577.35	2965.11	942.319	615.18	1065.24	267.038	430.548	1028.68	6167.71	5702.63	5906.68	5841.87
NEG_6485	3.586	425.162	Pentose-Hexose + C5H9	[M+HCOO]-	C16H28O10	Lipids and lipid-like molecules	Fatty Acyls		0.78	1801.71	1460.9	2207.5	1756.84	1757.1	1986.07	5085.15	2110.46	4756.65	1832.84	3609.51	4553.72	11302.6	11654.6	12953.4	10742.7	13788.2	28623.6	27568	24972.8	24374.4	21854.5	28646.2	4767.52	5217.28	4322.75	5197.85
POS_6035	3.596	427.173	[1-(3,4-Dihydroxy-5-methoxyphenyl)-7-(3,4-dihydroxyphenyl)heptan-3-yl] acetate	[M+Na]+	C22H28O7	Phenylpropanoids and polyketides	Diarylheptanoids		0.805	16329.1	12842.2	16341.8	14530.5	14137.3	13828.3	42937	35233.7	36803.7	36294	35648.6	36670.4	12824	10211.3	14416.5	13674.1	12004.2	10863	6203.49	10549.6	9915.54	10736.4	4614.52	14057.1	14358	12672.6	14275.1
NEG_13715	3.627	755.202	Cyanidin 3-(2G-glucosylrutinoside)	[M-2H]-	C33H41O20				0.777	50125.3	51562.9	44912.3	50361.6	45020.2	45867.8	33346.1	31671.5	30808.4	31791.5	31729.8	32121.2	70977.1	69958.3	75125.6	69465.9	75681.2	18442.5	19033.4	16878.8	19228.1	16589	18657	21220.5	21228.5	21657.9	21894.4
NEG_1887	3.629	227.073	Resveratrol	[M-H]-	C14H12O3	Phenylpropanoids and polyketides	Stilbenes	C03582	0.858	167337	166221	144403	163643	157557	161135	36879.3	27383.5	29680.2	32636.6	29770.2	32550.6	91839.3	82969.9	94200.1	86951.8	89768.8	17212.7	18002.7	16234.1	17093.3	12854.3	17598.2	46037.3	55749.9	53455.8	57406.8
NEG_5603	3.63	389.126	cis-Piceid	[M-H]-	C20H22O8	Phenylpropanoids and polyketides	Stilbenes		0.875	71104.2	67023	65674.1	67399.5	64326.6	66088	16805.1	14462.2	15215.3	15509.4	14735.3	16342.6	39640.6	36528.3	44673	37601.5	43028.1	11575.7	12880.2	11165.6	11303.1	9462.06	12215.5	20635.5	22521.2	22032.5	23533
NEG_6749	3.631	435.129	trans-piceid	[M+FA-H]-	C20H22O8				0.818	147510	146629	136720	146144	134563	141295	30721	27280.7	28921	30184.5	28916	29354.5	85250.6	78231.4	90891.6	79628.9	91012.3	19777.5	21384	19625.9	20780.6	17565.3	20297.9	43790.9	47325.4	46431.6	48233.2
NEG_5749	3.636	395.19	Hexose + C10H19O2	[M+HCOO]-	C16H30O8	Organic oxygen compounds	Organooxygen compounds		0.753	4202.45	3452.06	6886.49	7894.18	5937.44	3697.75	11802.2	9584.25	13995.2	21525.9	12377.6	13734.3	23152.1	23221.6	29456.1	21317.2	24901.5	27003.4	27572.6	30604.3	30232.3	20067.1	26106.9	9102.38	8401.46	8678.05	9857.66
NEG_810	3.637	163.039	Phenylpyruvic acid	[M-H]-	C9H8O3	Benzenoids	Benzene and substituted derivatives	C00166	0.917	17651.3	15853.8	17541.2	16568.8	15197.1	15371.4	22985.6	20703.5	20920.9	23791.5	21559.5	21632.4	38463.3	37847.8	43610.4	37352.9	46158	14129.4	13945.2	12803.7	12278.3	11126.7	15235.8	12575.2	12777.9	12408	13752.4
NEG_2950	3.642	281.137	Octyl gallate	[M-H]-	C15H22O5				0.737	16373.7	13710.2	16512.3	15248.2	13630.3	14541.1	38998.7	33363	33657.3	37004.2	34045.4	34844.1	46286.5	45983	54399.7	45644.6	58329.7	50959.2	54428.8	47132.1	46848	44056.8	54287.2	15412	15413.8	15447	15447
POS_3265	3.648	305.066	(-)-Epitaxifolin	[M+H]+	C15H12O7	Phenylpropanoids and polyketides	Flavonoids		0.804	21925.4	17534.4	25527.8	19428.6	17323.4	17742	5203.92	3420.75	4027.01	3599.64	3916.32	3794.91	28759.4	26970.5	34321.3	25915.9	36909.9	3082.2	3732.5	3057.68	2620.83	2777.44	3811.78	10007.8	9885.43	9993.41	9805.67
NEG_7611	3.649	465.104	Taxifolin-3-glucoside	[M-H]-	C21H22O12	Phenylpropanoids and polyketides	Flavonoids		0.828	2.02542e+06	1.61363e+06	1.77789e+06	1.69057e+06	1.43607e+06	1.65612e+06	298564	233387	252653	276177	248185	264876	1.52486e+06	1.41679e+06	1.9864e+06	1.31194e+06	2.05784e+06	133746	120681	113147	93719	107652	137939	298991	328533	253182	338562
POS_7640	3.65	499.175	Mundulone acetate	[M+Na]+	C28H28O7	Phenylpropanoids and polyketides	Isoflavonoids		0.783	1889.4	1869.53	3019.58	1773.02	1631.95	2640.29	1923.58	1016.59	994.109	1330.54	1232.23	1257.75	6074.56	5664.37	6098.31	5508.39	7802.11	18478.7	21480.3	16966.4	15581	16347.7	22849.7	7753.36	8490.92	8390.67	8266.12
POS_6354	3.656	441.116	Barbaloin	[M+Na]+		Benzenoids	Anthracenes		0.83	8345.05	7554.53	8370.51	8097.4	7747.49	7954.3	27294.3	23058.9	25135.1	24394.5	24112.6	26292.9	264683	262547	271160	247209	257925	224507	223522	220297	217448	210615	225459	127479	130242	119860	128531
NEG_11397	3.656	623.165	Isorhamnetin-3-O-galactoside-6''-rhamnoside	[M-H]-	C28H32O16				0.728	79349.1	65253.3	74965.4	71308.5	66236.3	65899.7	3342.37	2457.27	1075.4	582.535	3057.57	899.18	16286.8	19808.8	23440.5	19042.2	25264.9	4628.87	4815.35	4246.61	4541.71	4435.88	5120.7	4609.5	4999.62	3991.2	4726.77
NEG_11056	3.657	607.168	Diosmetin-7-O-rutinoside	[M-H]-	C28H32O15	Phenylpropanoids and polyketides	Flavonoids	C10039	0.793	40325.9	29906.7	38567.4	30980.1	29061.2	29958.2	13976.3	10524.4	11841.7	12489.2	12520.6	12770.3	14161.7	12495.9	15539.3	13426.7	12879.4	9251.01	11181.9	5036.46	5109.89	5764.99	9796.13	5942.34	6502.71	6131.09	6431.77
NEG_5891	3.661	401.143	Benzyl alcohol + Hex-Pen	[M-H]-	C18H26O10	Organic oxygen compounds	Organooxygen compounds		0.765	22922.8	20442.7	19658.4	20068.2	20099.8	19438.9	53747.6	44027.5	45764.9	51020	45688	47416.5	940834	857508	1.12345e+06	855664	1.16989e+06	744566	804580	691720	665290	590595	806133	161975	182102	177784	187526
POS_6462	3.664	447.196	HT-2 Toxin	[M+Na]+	C22H32O8	Lipids and lipid-like molecules	Prenol lipids		0.732	19740.5	5983.99	23449.9	11794.2	7704.76	8728.24	4743.45	2847.51	4066.83	3267.99	4493.41	2003.31	64706.9	50990.8	73695.8	49920.6	79877.7	34548.9	38749.3	31783.1	29056.6	24660.1	37964.3	15239.3	14819.5	14491.1	15845.9
POS_9957	3.669	605.218	Diadinoxanthin A	[M+Na]+	C40H54O3	Lipids and lipid-like molecules	Prenol lipids		0.746	17614.6	17515.5	16542.7	16465.3	20124.6	15930.3	3871.66	4352.96	4145.41	3726.85	3432.96	4300.49	14597.2	16659.6	19238.5	18376.4	17799.7	7358.51	7126.53	6961.48	7075.01	6242.53	7751.02	8457.72	10299.9	9192.78	10191
POS_7964	3.68	513.193	Lyalosidic acid	[M+H]+	C26H28N2O9	Lipids and lipid-like molecules	Prenol lipids		0.802	2912.83	2349.25	4030.55	2742.66	2958.13	3573.26	1609.69	1137.07	1150.58	1168.1	986.698	971.325	29235.1	27699.5	35527.1	27916.3	37776.6	11203.1	10538.5	9206.93	22116.2	6978.76	29461.9	8601.46	8705.39	8707.9	8351.72
POS_8895	3.687	551.227	Satratoxin H	[M+Na]+	C29H36O9	Lipids and lipid-like molecules	Prenol lipids		0.771	41971.1	24749.3	58883.4	31710.6	25797.7	27133	1115.73	1986.77	1050.86	492.855	1113.16	579.033	5062.16	3522.65	6113.76	3097.41	8515.62	1595.58	2919.42	2561.11	654.18	2648.52	1537.38	2780.22	3242.22	2708.94	2788.43
NEG_8700	3.689	505.101	3,4,5-Trihydroxy-6-[5-hydroxy-2-(4-hydroxy-3-methoxyphenyl)-3-methoxy-4-oxochromen-7-yl]oxyoxane-2-carboxylic acid	[M-H]-	C23H22O13	Phenylpropanoids and polyketides	Flavonoids		0.792	99393.8	100936	97421.1	105656	95517.3	106470	1197.23	487.676	894.605	326.279	1036.15	1213.31	44798.8	46211.7	46211.6	49080.8	56622.4	5945.46	6074.5	4796.35	4404.72	5006.51	6387.89	6698.15	9386.52	9362.18	8916.43
NEG_11401	3.703	623.199	Verbascoside	[M-H]-	C29H36O15				0.701	16845.1	17088.2	15334.6	16200.6	16256.8	16867.2	12337.8	11614.5	12038.4	12846.1	12545.3	12164.7	49060.5	45711.6	42905.1	51288.5	42601.1	22635.9	21882.5	22291.8	20330.1	22752.9	22277.7	15632.8	15306.7	15394.2	15302.9
POS_7890	3.738	509.169	Scutellarioside II	[M+H]+	C24H28O12	Phenylpropanoids and polyketides	Cinnamic acids and derivatives		0.718	142520	123788	168484	130933	119249	126301	33662.6	24349	27759.9	27842.5	24789.1	28414	174082	152702	214047	159583	223958	34375.2	38444.6	32521.1	30848.7	26122.6	40339.4	53547.1	55681.8	55093	55391.4
POS_3745	3.742	331.151	Tetrahydrosappanone A Trimethyl Ether	[M+H]+	C19H22O5				0.771	89690.2	76253.8	105762	83417.9	73502.9	81469.1	49917.6	40402.2	41424.7	41785.6	42397.1	44142.6	108117	103976	124022	93217.1	123994	129237	127545	123702	112902	98453.9	140459	62956.4	62224.8	62855	62955.9
POS_1556	3.743	207.099	Ethyl 4-methoxycinnamate	[M+H]+	C12H14O3				0.734	27754.4	24979.4	30743.5	24138.1	23860.4	24398.2	17352	13855	15698.1	14841.7	15298.2	17672.5	32746.8	29016	32907.1	29669.8	32981.1	35097.8	33394.9	32347.5	30776.7	27666.2	37996.1	19444.3	20317.8	19177.6	20075.9
NEG_2636	3.743	269.046	Nordazepam	[M-H]-	C15H11ClN2O	Organoheterocyclic compounds	Benzodiazepines	C07486	0.784	8409.23	8264.83	8077.82	7938.58	8910.03	8272.14	214.686	110.544	79.1521	142.725	78.938	220.603	9546.32	8149.81	9346.04	8506.3	9328.57	585.397	469.862	502.98	312.484	217.976	695.585	2712.01	3117.54	3034.48	3112.08
POS_10217	3.744	619.161	Jaslanceoside A	[M+Na]+	C27H32O15	Lipids and lipid-like molecules	Prenol lipids		0.736	103727	86285.7	110667	92525.8	90588	88417.4	543.773	116.278	460.037	484.812	444.857	615.677	57238.7	55106.3	60500.5	53710.6	62854.4	1097.72	1690.32	1092.03	520.529	934.534	1543.47	14708.4	15583.7	15256.9	15369.6
POS_7252	3.748	483.18	(2R,3S,4S,5R,6R)-2-[[(2S,3R,4R)-3,4-dihydroxy-4-(hydroxymethyl)oxolan-2-yl]oxymethyl]-6-[4-(4-hydroxyphenyl)butan-2-yloxy]oxane-3,4,5-triol	[M+Na]+	C21H32O11	Lipids and lipid-like molecules	Fatty Acyls		0.814	15420.4	12285.8	13710	12958.2	10724.3	8936.71	2166.33	1875.56	2733.02	2486.03	2044.85	2602.44	14424.5	12047.6	15521.8	12630.7	13523.9	2671.38	2194.98	3500.37	4137.61	2525.56	3645.84	6448.92	6325.08	5648.35	6450.54
POS_5262	3.763	393.206	Cylindrol B	[M+Na]+	C23H30O4	Organic oxygen compounds	Organooxygen compounds		0.863	13542.7	9786.74	12281	11878.7	9615.02	10577.4	6530.78	6275.49	5697.69	6546.68	5589.19	8074.04	9766.94	12722.2	10314	9664.92	8779.31	11892.7	8127.18	6771.99	9854.74	6570	13094.9	10169.2	8589.2	9853.33	9651.6
POS_9002	3.811	557.195	Arctiin	[M+Na]+	C27H34O11	Lignans, neolignans and related compounds	Lignan glycosides		0.788	10020.3	9729.98	10011.8	10620.2	9360.85	10820.4	14869.7	10398.8	10753.3	11727.7	9242.76	11024.9	71219.9	66409.3	70267.4	65576.7	68881	91296.6	97085.3	85032.6	83964.1	77350.3	102779	35842.1	36678.8	36025.7	35841.4
POS_1559	3.816	207.139	Dexibuprofen	[M+H]+	C13H18O2	Phenylpropanoids and polyketides	Phenylpropanoic acids		0.702	23064.7	23156.2	22241.3	23529.2	23080	23699.9	51916.1	43980.4	45258.2	42167.7	45328.8	45540.7	42622.2	41089.2	38993.5	35625.4	36957.7	48610.6	43377	45433.8	36348.2	37805.6	46517.2	28922.8	28924.1	29168	29165.8
NEG_6381	3.849	421.165	3-[(7S,8S)-5-Hydroxy-2,2,7,8-tetramethyl-6-oxo-7,8-dihydropyrano[3,2-g]chromen-10-yl]-3-phenylpropanoic acid	[M-H]-	C25H26O6	Organoheterocyclic compounds	Benzopyrans		0.729	88907.2	66390.2	91146.7	82378.2	60935.1	73649	101224	68284.7	92291.6	96733.9	87918.4	87899.2	13407.9	11228.6	19586.8	10494.7	20749.7	6572.98	7184.35	6282.34	5649.74	4742.68	7852.69	13067.6	15609.4	15065.4	16599
NEG_8971	3.849	515.123	3,5-Dicaffeoylquinic acids	[M-H]-	C25H24O12	Organic oxygen compounds	Organooxygen compounds		0.956	1.55336e+06	1.39851e+06	1.72399e+06	1.4982e+06	1.44202e+06	1.4426e+06	169021	142157	141717	140256	145337	137650	279559	287531	321989	265944	385661	259700	123188	98984.4	177256	163989	207937	121122	121141	134948	121141
POS_6965	3.851	469.163	Phenethyl sophoroside	[M+Na]+	C20H30O11	Organic oxygen compounds	Organooxygen compounds		0.838	19590.9	15687.9	18289.3	17673.5	16256.2	17674.3	30339.1	23953	27535.6	27749.2	24876.6	25972.5	104977	96927.6	106170	96364.1	107187	15790.5	17306	13301.3	14484.3	13718.8	19432.7	30328.3	34003.4	28152	30887
NEG_3142	3.853	285.097	Salicin	[M-H]-	C13H18O7	Organic oxygen compounds	Organooxygen compounds	C01451	0.734	1119.24	1269.23	1288.8	1220.92	1355.87	1673.6	192.192	319.071	365.49	86.6212	550.274	321.971	409.087	644.619	497.992	461.572	1194.28	110871	110844	99186.2	96830.7	88176.3	114002	10049.4	11152.5	10814.1	11508
NEG_349	3.855	123.046	Salicyl alcohol	[M-H]-	C7H8O2	Benzenoids	Benzene and substituted derivatives	C02323	0.918	682.511	565.71	650.902	332.449	622.698	745.192	392.61	720.624	352.712	337.733	405.987	452.396	615.106	336.915	349.358	531.48	376.56	24412.6	23764.9	20833.6	18899.3	18075.8	23565.1	2790.36	2951.94	2798.48	3625.91
NEG_14002	3.857	771.199	Quercetin 3-rutinoside 7-galactoside	[M-H]-	C33H40O21	Phenylpropanoids and polyketides	Flavonoids		0.871	78290.8	72268.1	82546.6	81982.1	76968.8	76218.5	15518.7	14593	15813.4	15851.5	14973.3	15220.3	225200	209481	257696	198817	310550	55460.1	55231.1	50434.9	48282.3	51495.9	55706	25915.1	25916.1	26105.4	26105.1
NEG_4953	3.868	361.139	3-O-Acetylpadmatin	[M-C6H10O4-H]-	C18H16O8	Phenylpropanoids and polyketides	Flavonoids		0.734	51523.3	55269.4	47574	55835.4	51550.7	54904.1	146303	119330	140300	133882	139457	139957	127326	119612	129020	111553	132591	150215	149140	136372	137666	122509	155092	43008.4	45725.5	44411.6	45940.5
POS_7158	3.893	479.113	Petunidin 3-galactoside	[M]+	C22H23O12	Phenylpropanoids and polyketides	Flavonoids		0.824	29199.1	15156.5	33485.3	21501.9	20370.6	23343.1	347.742	121.886	51.3039	152.968	305.192	112.978	906.99	1039.16	870.824	746.753	1155.49	76.2907	66.8057	206.386	208.107	116.796	378.807	1646.83	1839.5	1529.25	1685.69
POS_6961	3.916	469.129	Monotropitoside	[M+Na]+	C19H26O12	Organic oxygen compounds	Organooxygen compounds		0.875	24715.6	20630.8	26968.6	25558.7	21613.2	23521.4	90262.4	77274.6	84368.9	84935.1	81513	82521.8	67605.8	59516.9	73905.7	64063.4	75743.7	124023	129445	110708	105721	101432	125232	64459.5	74061.7	66888.4	67980.5
POS_10854	3.93	659.155	9-Methoxy-7-[4-[3,4,5-trihydroxy-6-[[3,4,5-trihydroxy-6-(hydroxymethyl)oxan-2-yl]oxymethyl]oxan-2-yl]oxyphenyl]-[1,3]dioxolo[4,5-g]chromen-8-one	[M+Na]+	C29H32O16	Phenylpropanoids and polyketides	Isoflavonoids		0.72	14525.1	10278.8	15275.3	13569.9	11840.7	12751.9	1924.1	1746.51	1678.4	1691.31	1775.58	1614.46	2743.78	2693.28	2570.67	2473.46	2974.67	460.662	365.088	347.95	393.586	289.447	387.814	3214.85	3217.51	2908.44	3219.07
POS_8705	3.946	543.242	(2R,3E)-4-[(1S,6R)-1-Hydroxy-2,2,6-trimethyl-4-oxocyclohexyl]-3-buten-2-yl 6-O-beta-D-xylopyranosyl-beta-D-glucopyranoside	[M+Na]+	C24H40O12	Lipids and lipid-like molecules	Fatty Acyls		0.841	133270	109063	134887	124714	115772	121325	66055.6	51527.9	56419.7	60952.6	57595.4	55992.9	1.12347e+06	1.02698e+06	1.21332e+06	1.03119e+06	1.29708e+06	898186	943665	842346	764751	731103	934835	464935	486045	479925	482807
NEG_11430	3.972	625.142	Quercetin 3-O-sophoroside	[M-H]-		Phenylpropanoids and polyketides	Flavonoids		0.854	71254.3	69055.7	88740	81964.9	73350.7	77167.1	58607.8	48428.3	49954.1	53790.9	50824.9	51133.1	145601	132782	170843	123886	189568	35770.1	37472.8	31707.5	32591.2	32492.7	38947.2	25321.3	25535.7	25323.7	26607
NEG_5602	3.986	389.124	Polydatin	[M-H]-	C20H22O8	Phenylpropanoids and polyketides	Stilbenes	C10275	0.725	7779.4	7036.81	8341.14	7031.5	7134.56	7592.97	6776.3	4817.16	7022.4	6012.46	5867.81	6004.4	6971.48	5727.21	6850.19	5816.03	6577.15	4909.59	4698.01	4539.33	4668.95	4727.16	5168.27	3351.6	3476.46	2903.47	3863.42
POS_8212	3.988	523.213	cyclo[DL-Ala-DL-Trp-DL-Ala-DL-Val-Gly]	[M+K]+	C24H32N6O5	Organic acids and derivatives	Carboxylic acids and derivatives		0.712	8884.26	8853.23	11338.5	9391.6	7638.07	8773.6	7712.63	5501.74	5216.6	5402.49	5641.35	5824.92	20247.9	19073.6	23426.1	17420	24323.2	16076.3	17173.9	13802.2	15040.6	12004.3	17669.7	9604.36	9269.09	9547.04	9506.98
NEG_9603	3.988	539.212	2-[3-[4-[1,3-Dihydroxy-1-(4-hydroxy-3-methoxyphenyl)propan-2-yl]oxy-3-methoxyphenyl]propoxy]-6-(hydroxymethyl)oxane-3,4,5-triol	[M-H]-	C26H36O12	Lignans, neolignans and related compounds	Lignan glycosides		0.917	241100	242373	262607	259617	256712	273763	166213	136054	150437	152835	152248	147758	534752	498742	577251	484657	587912	460703	480275	456757	438726	409211	501461	146319	154854	151284	155131
POS_9127	3.989	563.184	7-[3-[(2R,3R,4R)-3,4-Dihydroxy-4-(hydroxymethyl)oxolan-2-yl]oxy-4,5-dihydroxy-6-(hydroxymethyl)oxan-2-yl]oxy-3-(4-methoxyphenyl)chromen-4-one	[M+H]+	C27H30O13	Phenylpropanoids and polyketides	Isoflavonoids		0.709	138201	57442.2	135534	172536	43726.5	131437	33149.8	24854.4	40967.2	46054.4	51581.3	36790.6	147680	118395	186001	69374.7	92952.1	124404	84288.7	121715	133000	45009.1	70257.2	102713	41795.4	124366	93164.1
POS_9511	3.99	579.185	Vitexin 2''-O-rhamnoside	[M+H]+	C27H30O14	Phenylpropanoids and polyketides	Flavonoids		0.729	100948	83839.6	109048	90620.9	94204.1	94863.9	86583.2	74690.7	80983.1	77557.8	79460.9	78638.6	179598	155181	188261	171419	199167	195877	195007	183176	169493	167603	193885	101161	105546	104122	104349
POS_6284	4.007	437.237	Nonaethylene glycol	[M+Na]+	C18H38O10	Organic oxygen compounds	Organooxygen compounds		0.884	8341.57	5899.34	9231.18	7450.84	6947.7	7901.54	4750.84	4432.49	4613.64	4035.82	4447.02	5271.01	7138.97	7483.47	7775.14	6095	8331.57	7329.25	5511.34	4811.3	6244.79	4186.96	7065.42	7626.98	6556.03	6750.68	6571.97
NEG_908	4.011	167.036	4-Methoxysalicylic acid	[M-H]-	C8H8O4	Benzenoids	Benzene and substituted derivatives		0.835	1.54531e+06	1.43372e+06	1.3934e+06	1.53797e+06	1.52372e+06	1.58891e+06	5086.62	28618.9	29385.3	33092	29799.5	26755.6	803561	796161	1.07729e+06	761355	504767	332862	72410.2	271076	262804	270656	96772.1	331703	314690	336060	112223
POS_7271	4.013	484.14	Thalictricoside	[M+Na]+	C19H27NO12	Organic oxygen compounds	Organooxygen compounds		0.767	5281.57	4167.08	5434.28	5102.94	4257.98	4370.65	2622.07	2285.25	2576.04	2675.57	2717.53	2575.93	9372.17	8116.16	10466.2	8322.22	9292.77	1150.38	1554.05	1226.74	971.054	1343.72	1375.98	3813.16	3763.23	3761.62	3979.72
NEG_7610	4.026	465.104	(2S,3S)-3,5,7-Trihydroxy-2-[4-hydroxy-3-[(2S,3R,4S,5S,6R)-3,4,5-trihydroxy-6-(hydroxymethyl)oxan-2-yl]oxyphenyl]-2,3-dihydrochromen-4-one	[M-H]-	C21H22O12	Phenylpropanoids and polyketides	Flavonoids		0.902	369176	415980	530164	455779	428898	1.04658e+06	159357	136558	139030	149715	141487	145759	1.22984e+06	1.14023e+06	1.36845e+06	1.08791e+06	1.49435e+06	79045.1	87212.3	77314.3	75160.6	71175.9	86803.4	169775	183599	179639	183352
NEG_770	4.031	161.025	Umbelliferone	[M-H]-	C9H6O3	Phenylpropanoids and polyketides	Coumarins and derivatives	C09315	0.949	8303.7	7739.05	9809.97	9249.98	8334.1	8788.87	125681	105410	115275	119939	108809	113863	47478.2	44631.9	46771.1	40073.8	48585.2	15721.2	14879.2	13721.5	16759.6	13618.8	17944.9	18176.7	18178.1	18346.6	18344.9
NEG_7493	4.032	461.163	Hydrangeifolin I	[M+FA-H]-	C19H28O10	Organic oxygen compounds	Organooxygen compounds		0.754	4149.55	4867.74	5141.18	4554.39	4052.42	5426.45	18568	15853.8	16628.2	17648	16692.9	16795.8	71936.4	68715.8	77854.5	65549.3	81148.9	16287.3	16046.7	15021.3	14180.3	13810.5	17060	12083.7	12198	12084.7	12742.6
POS_5633	4.034	409.183	4-[4-(beta-D-Glucopyranosyloxy)-2-hydroxy-2,6,6-trimethylcyclohexylidene]-3-buten-2-one	[M+Na]+	C19H30O8	Lipids and lipid-like molecules	Prenol lipids		0.817	29417	23804.3	31708.2	28300.1	27690.7	27931.8	66875.1	57506.8	63553.6	61746	64236.8	58269.6	27156.5	24770.1	27106.9	26085.4	30889.4	51412.8	46827.6	48945.2	43324.5	43539.7	48659.9	34920.6	34920.4	34957	35249
NEG_2539	4.05	261.136	9-(2,3-Dihydroxypropoxy)-9-oxononanoic acid	[M-H]-	C12H22O6	Lipids and lipid-like molecules	Fatty Acyls		0.758	231259	181549	313690	221195	193392	221323	126756	108020	114991	122147	113028	116121	57287.9	56113.7	65168.1	51898.8	77130.2	199592	212091	192695	186535	185996	226246	48576	48140.4	48286.2	47997.9
NEG_3556	4.071	303.054	Dihydroquercetin	[M-H]-	C15H12O7	Phenylpropanoids and polyketides	Flavonoids		0.95	1.44556e+06	1.33422e+06	1.56833e+06	1.49488e+06	1.33683e+06	1.513e+06	1.68414e+06	1.4426e+06	1.54649e+06	1.57934e+06	1.54526e+06	1.57496e+06	1.06261e+06	964561	1.10691e+06	944089	1.1629e+06	922859	963024	906883	894492	847792	999951	602436	624757	609988	640446
NEG_1057	4.075	177.02	5,7-Dihydroxychromone	[M-H]-	C9H6O4				0.711	37843.6	32444.1	41519.4	37191.3	32894.2	37486.6	41115.5	34191.1	36947.5	38626.6	37846.9	38104.4	25597	23442.8	28857.2	22520.7	29955.7	22875.5	24901.4	20867.5	21935	19020.6	24996.5	14721.2	16382.9	15975.2	16691.6
POS_4110	4.077	344.242	Dibucaine	[M+H]+	C20H29N3O2	Organoheterocyclic compounds	Quinolines and derivatives	C07879	0.711	19820.3	17753.3	20471	20319.6	18181.7	16654.1	20638.9	14835.9	19865.9	20715.6	19133.8	17789.7	21733.8	24200.3	32157.1	25572.3	34549	22595.7	17897	17665.8	16597.3	12669.6	22145.2	15818.8	15513.2	15516.5	17086.6
POS_3121	4.082	297.152	1,2-Didehydrotanshinone IIA	[M+H]+	C19H20O3	Lipids and lipid-like molecules	Prenol lipids		0.7	19563.7	15551.7	23727.1	19519.4	16077.6	17150.7	2591.6	3128.62	1988.6	2459.88	2545.23	3676.91	5648.39	6254.56	8046.24	5794.45	7915.28	5241.44	4025.5	3742.04	3306.99	3746.75	4190.62	6850.74	7272.78	6538.5	7030.9
NEG_5078	4.096	367.104	(E)-3-(3,4-Dihydroxyphenyl)acrylic acid (1R,2R,3R)-2,3,5-trihydroxy-5-(methoxycarbonyl)cyclohexyl ester	[M-H]-	C17H20O9	Organic oxygen compounds	Organooxygen compounds		0.732	6539.68	5179.86	7159.44	6542.92	5463.9	7076.8	3200.92	3130.68	3952.34	2958.37	3138.91	3854.42	4175.96	3778.37	5113.4	2991.54	3540.41	4166.48	3258.12	4142.62	3774.36	2097.3	4048.26	1638.87	1728.85	1639.26	2077.07
NEG_1540	4.096	207.012	2-Naphthalenesulfonic acid	[M-H]-	C10H8O3S	Benzenoids	Naphthalenes		0.919	10728.8	7527.44	11625.4	9534.33	8128.25	9479.54	7936.75	5010.6	6579.38	6728	6291.86	6287.49	6952.75	5557.61	7298.55	5757.61	8164.59	8022.22	8591.86	7039.89	7162.21	7615.79	8295.65	4656.54	5201.39	4742.09	5582.76
NEG_3522	4.096	301.039	Taxifolin	[M-H]-	C15H12O7	Phenylpropanoids and polyketides	Flavonoids		0.723	82790.3	70178.6	80114.3	74053.9	67521.5	76084	61017.9	51729.9	58199.3	60357.3	59092.7	60520.3	45470.9	40792.9	51392.6	40244.5	48941.8	27088	26534.8	24975.8	25499.7	22511.5	29160.2	23558.7	26870.8	26084.9	27780.6
POS_6664	4.097	455.147	5‐(1‐benzofuran‐2‐yl)‐N,N‐dimethyl‐2‐[4‐(piperazin‐1‐yl)phenyl]‐1,3‐thiazole‐4‐carboxamide	[M+Na]+	C24H24N4O2S	Organoheterocyclic compounds	Diazinanes		0.844	730.183	558.13	1392.72	520.652	1167.6	562.038	3837.01	3132.8	3316.07	2951.91	3068.18	3123.59	41774.1	34707.7	43965	42989.2	46032.6	9556.19	9062.31	7424.37	8644.17	6898.57	10208.6	10526.3	11541.7	10631.6	11046.1
NEG_13716	4.127	755.21	3-[6-[[(2R,3R,4R,5S,6S)-3,5-Dihydroxy-6-methyl-4-[(2S,3R,4R,5R,6S)-3,4,5-trihydroxy-6-methyloxan-2-yl]oxyoxan-2-yl]oxymethyl]-3,4,5-trihydroxyoxan-2-yl]oxy-2-(3,4-dihydroxyphenyl)-5,7-dihydroxychromen-4-one	[M-H]-	C33H40O20	Phenylpropanoids and polyketides	Flavonoids		0.921	202533	180068	207613	194249	169232	175046	17991.1	16117.1	16999.9	10982	16231.4	16699.5	59931.6	55710.5	61805.7	52156.1	78363	18373.1	18765.1	16122.1	16765.5	15817.4	18683.7	17996.5	18739.3	18737.2	18737.9
POS_7078	4.128	475.189	[5-Ethenyl-3-hydroxy-4-(3-hydroxyprop-1-en-2-yl)-2-(3-methoxy-3-oxoprop-1-en-2-yl)-5-methylcyclohexyl] 4-acetyloxy-3-hydroxy-2-methylidenebutanoate	[M+Na]+	C23H32O9	Lipids and lipid-like molecules	Prenol lipids		0.809	24386.1	21319.1	30014.6	22302.4	21153.5	21434.8	18460	14950.2	16672.3	16243.7	14811.4	18135.9	87448.5	84496	95453.7	75975.9	101861	30926.2	31776.9	27569.7	27274.3	25827.8	31644	26578.4	28803.8	28380.4	29250.2
POS_5026	4.138	381.111	3-[2-Methoxy-3-[(2S,3R,4S,5S,6R)-3,4,5-trihydroxy-6-(hydroxymethyl)oxan-2-yl]oxyphenyl]propanoic acid	[M+Na]+	C16H22O9	Organic oxygen compounds	Organooxygen compounds		0.768	4062.66	4075.22	4584.66	3595.82	3396.48	4168.88	7204.43	5184.52	5129.6	5581.99	5584.46	5432.04	20477	27383.7	30679.4	25904	35829.7	4034.17	4414.89	3277.98	3238.34	3224.77	4280.27	8121.22	8313.22	8179.33	8070.36
NEG_7928	4.149	477.107	Isorhamnetin-3-O-glucoside	[M-H]-	C22H22O12	Phenylpropanoids and polyketides	Flavonoids		0.759	65611.5	54334.8	70706.1	57856.1	48516.2	54903.3	1386.5	1301.34	1494.83	1657.87	1755.97	2140.57	24563.7	22806.7	35011.3	21349.1	49342.7	4421.24	4895.6	3195.19	3830.6	3474.17	5378.96	3749.5	4188.15	3907.65	3795.06
NEG_8969	4.179	515.12	Isochlorogenic acid B	[M-H]-	C25H24O12				0.944	495850	384921	494915	456847	355659	388191	59231.2	51648.9	55676.2	57651.5	54150.5	51900.1	95886.9	93255.9	104267	85188.6	134948	35758.9	37159.2	32559	30598.3	28381	37382.2	43350.7	44202.5	44069.3	44198.5
NEG_4758	4.185	353.087	Chlorogenic acid	[M-H]-	C16H18O9	Organic oxygen compounds	Organooxygen compounds	C00852	0.775	31176.6	28990	26471.8	27475.2	22568	28008.9	9517.27	7821.09	7307.78	8806.23	8032.06	8474.59	13799.7	11041.6	14126.7	10889	12427.2	6260.02	9393.54	8072.99	5246.7	8808.87	11108.7	5990.92	6126.74	6180.09	6073.05
NEG_8963	4.185	515.095	Isochlorogenic acid A	[M-H]-	C25H24O12	Organic oxygen compounds	Organooxygen compounds		0.812	35600.4	24135.5	31698	27219	20157.7	40278.9	2748.57	4031.39	2408.35	974.452	2720.49	4073.76	11320	13772.9	9889.96	7237.04	14208.5	2808.6	2130.27	1419.79	2337.06	2179.5	2552.06	3914.97	4227.37	2996.35	4702.07
POS_3234	4.209	303.118	(3As,6S,7R,8aR)-8-hydroxy-6,8-dimethyl-3-methylidenespiro[4,5,6,8a-tetrahydro-3aH-cyclohepta[b]furan-7,5'-oxolane]-2,2'-dione	[M+Na]+	C15H20O5	Lipids and lipid-like molecules	Prenol lipids		0.83	42674.9	32611.7	49492.8	37758.9	35702.6	34751.6	36271.8	30275.4	33046.1	36838.8	34086	34983.6	46515.9	46479.9	58657.1	43014	59311.6	18020.6	17717.6	15445.6	16359.9	14630.8	18702	25087.3	25090.4	25767.3	25234.7
NEG_1677	4.215	217.109	Di-tert-butyl dicarbonate	[M-H]-	C10H18O5	Organic acids and derivatives	Organic carbonic acids and derivatives		0.731	10342.4	7290.46	11696.2	9782.56	7520.03	8213.31	6496.04	5702.8	5830.03	6096.53	5849.99	6275.62	5963.49	5953.24	7117.76	5194.78	8220.01	16887.5	15759.1	13491.1	14299.8	12466.1	15709.2	3755.42	3581.85	3983.26	3716.94
POS_7203	4.216	481.257	Decaethylene glycol	[M+Na]+	C20H42O11	Organic oxygen compounds	Organooxygen compounds		0.819	5781.06	4779.91	6538.82	5507.51	4252.46	5371.88	3623.91	3547.6	3561.26	3484.76	3842.88	5119.44	4541.92	5945.87	5167.21	4498.09	5855.55	5621.94	4621.52	4265.47	5526.43	3889.26	5685.85	5720.38	5198.78	5309.29	5122.83
POS_12389	4.246	765.253	(2S,3R,4S,5S,6R)-2-[4-[(3S,3aR,6S,6aR)-6-[3,5-Dimethoxy-4-[(2S,3R,4S,5S,6R)-3,4,5-trihydroxy-6-(hydroxymethyl)oxan-2-yl]oxyphenyl]-1,3,3a,4,6,6a-hexahydrofuro[3,4-c]furan-3-yl]-2,6-dimethoxyphenoxy]-6-(hydroxymethyl)oxane-3,4,5-triol	[M+Na]+	C34H46O18	Lignans, neolignans and related compounds	Lignan glycosides		0.801	7158.13	6535.58	7344.28	6013.3	6145.9	6066.01	236.552	175.116	289.786	255.161	531.919	193.362	1002.72	724.268	1268.95	675.271	1030.52	14038.9	15560.9	12905.2	13799.3	14304.1	14697.8	2546.45	2582.51	2663.72	2594.23
POS_6325	4.255	439.159	Phenethyl 2-O-(beta-D-xylopyranosyl)-beta-D-glucopyranoside	[M+Na]+	C19H28O10	Organic oxygen compounds	Organooxygen compounds		0.869	426075	382868	464476	394021	384751	393259	432509	376529	400103	419367	393486	420634	1.35709e+06	1.32666e+06	1.47097e+06	1.27117e+06	1.53086e+06	934218	955614	883138	877237	837564	952036	659049	659076	665475	665404
POS_6207	4.255	434.199	Sayaendoside	[M+NH4]+	C19H28O10	Organic oxygen compounds	Organooxygen compounds		0.805	35273.8	30525.3	40451.3	30938.9	29555.5	33770.1	74084.5	62172.2	62861.3	63366	65149.1	69257.2	207625	207514	246156	184156	243734	170326	177611	160161	153430	137453	190260	81801.6	81801.7	82835.4	82059.1
NEG_7185	4.255	451.137	Methyl (1R,4aS,9S,10S)-10-acetyloxy-5,9-dihydroxy-1,4a-dimethyl-2-oxo-7-propan-2-yl-10,10a-dihydro-9H-phenanthrene-1-carboxylate	[M+Cl]-	C23H28O7	Lipids and lipid-like molecules	Steroids and steroid derivatives		0.756	46608.1	30163.6	43130.8	44095.2	28007.7	37472.4	53865	41534.8	49157.1	48752.1	47416.3	48916.4	105759	89403.2	137071	82813.4	157698	93675.3	93438.8	80359.1	76229.1	64737.4	88360.8	23885.4	27829.7	26632.5	29267.5
NEG_6228	4.256	415.16	2-Phenylethyl 6-O-[(2S,3R,4R)-3,4-dihydroxy-4-(hydroxymethyl)tetrahydro-2-furanyl]-beta-D-glucopyranoside	[M-H]-	C19H28O10	Organic oxygen compounds	Organooxygen compounds		0.793	108096	85277.4	108959	102432	73768.1	91827.6	170932	127588	151387	113771	144548	152815	374997	337403	490676	325823	554453	315158	309782	263303	247037	216061	292527	97200.2	102481	93147.5	115589
NEG_7497	4.256	461.166	Bioside	[M-H]-	C20H30O12	Organic oxygen compounds	Organooxygen compounds		0.772	96227.1	82241.8	91074	97213.6	77054.5	90366.7	181412	152993	172118	172461	165617	170636	370261	342183	442131	334531	484893	360972	360588	321800	303450	282079	343456	96682	102854	100976	104972
NEG_556	4.276	147.044	3,4-Dihydrocoumarin	[M-H]-	C9H8O2	Phenylpropanoids and polyketides	3,4-dihydrocoumarins	C02274	0.797	3990.45	4100.24	4531.96	4985.46	4224.94	4315.58	8715.76	7936.45	9118.05	9313.36	8279.66	8653.07	40725.8	38555.1	45089.9	36936.3	46056.2	28264	28257.2	25096.7	24639.2	24695.3	27717.9	9658.81	10310.5	10155.7	10305.4
POS_5412	4.28	399.138	[1,3-Dihydroxy-1-(7-methoxy-2-oxochromen-6-yl)-3-methylbutan-2-yl] (E)-2-methylbut-2-enoate	[M+Na]+	C20H24O7	Phenylpropanoids and polyketides	Coumarins and derivatives		0.817	2008.76	2801.07	3420.6	3575.54	1681.51	1365.68	17108.2	18003.4	19695	11738.3	19396.3	21043.9	46868.3	44563.5	49599.4	39123.8	27350.4	139941	88711.6	148506	144260	68627.5	121101	38313	34536.3	36613.4	40609.4
POS_660	4.28	147.044	3-(4-Hydroxyphenyl)-2-propenoic acid	[M+H-H2O]+	C9H8O3	Phenylpropanoids and polyketides	Cinnamic acids and derivatives		0.769	9864.14	9284.68	11148.2	8890.66	8592.63	8596.44	12206.8	11620	11275	10443.2	10787.3	11890.3	12360.4	12543.2	12526.5	11874.4	14497.2	7593.87	8422.1	7464.59	7158.9	6536.82	8384.44	7740.51	8260.13	8283.89	8116.05
NEG_11114	4.287	609.145	Rutin	[M-H]-	C27H30O16	Phenylpropanoids and polyketides	Flavonoids	C05625	0.935	155614	132862	137778	151022	119803	138773	55611.3	50020.4	50365.5	56851.2	50201.1	54344.3	56244	55038.2	71536.4	49850.9	87181.6	132168	126165	115234	106069	103525	119189	33146	33882.6	33436.7	34693.1
NEG_8698	4.293	505.097	Protohypericin	[M-H]-	C30H18O8				0.719	12155	10296.9	6761.9	4221.99	8204.57	9154.15	21938.4	11122.4	18559.2	17823.5	17719	19946.4	18141.5	19979.7	27877.1	18360.1	21788.8	5120.38	6305.9	4550.39	3771.69	3639.08	5111.07	3687.01	4291.93	1881.63	3938.98
NEG_3787	4.3	313.036	Porphyrillic acid	[M-H]-	C16H10O7	Organoheterocyclic compounds	Benzofurans		0.898	15140.4	8782.03	18816.3	10789.9	6820.4	9551.7	4881.19	2232.53	3017.25	3975.46	3099.85	3219.63	2603.84	3734.11	2141.49	589.03	4426.07	1118.04	5235.82	2729.19	2976.27	2037.16	4129.78	2931.45	2934.76	2716.35	2330.66
POS_3299	4.308	307.114	Cimifugin	[M+H]+	C16H18O6	Organoheterocyclic compounds	Benzopyrans		0.853	39332.7	37655.3	43524.7	34357.7	36313.2	37449.7	58581.7	52304.2	52746.5	55939.2	54678.8	53562.1	64497.5	62788.7	69624.9	59571.8	74597.4	5051.46	5915.23	5470.12	5797.19	5548.49	6131.23	27966.6	29372.8	29368.8	29369.2
POS_4314	4.322	353.154	(2,6,6-Trimethyl-4-oxo-2-cyclohexen-1-yl)methyl beta-D-glucopyranoside	[M+Na]+	C16H26O7	Organic oxygen compounds	Organooxygen compounds		0.715	14369.8	9730.46	13321.2	8712.45	10456	13211.4	4448.68	3504.31	2430.57	3635.44	5678.63	4313.27	3808.89	1956.78	4711.56	3691.92	4960.78	2341.34	1741.98	1431.28	2122.26	891.607	4001.08	4865.59	3871.67	4867.63	4862.6
NEG_5308	4.345	377.179	(2R,3S,4S,5R,6S)-2-(hydroxymethyl)-6-[4-(hydroxymethyl)-1-propan-2-ylcyclohex-3-en-1-yl]oxyoxane-3,4,5-triol	[M+FA-H]-	C16H28O7	Lipids and lipid-like molecules	Prenol lipids		0.701	7236.92	6579.39	7955.03	9354.71	6454.54	7290.82	10365	9270.76	11030.4	10288	10309.9	10025.3	7905.99	7545.43	10201	7015.27	8700.05	9890.83	10449.8	11288.2	10019.1	3065.25	10049	3269.1	3356.68	2547.62	3351.58
POS_3746	4.355	331.151	8-(3-Methoxy-2-(methoxycarbonyl)phenyl)octanoic acid	[M+Na]+	C17H24O5	Benzenoids	Benzene and substituted derivatives		0.735	16817.7	13890.7	17326	12962.4	12320.1	13465.7	15479.6	11243.9	12779.3	13045.7	13796.5	13779.5	16008	16357.8	20639.1	11564.2	22386	69377.9	73843	61218.8	59933.5	51025.2	77457.5	20357.9	20359.9	20163.9	20162.1
POS_1197	4.382	179.115	Isoproturon-didemethyl	[M+H]+	C10H14N2O	Benzenoids	Benzene and substituted derivatives		0.7	24213.8	20240.6	25387.7	23851.8	19511.9	21277.8	26034.2	22478.1	23746.3	24360.9	19715.3	32645.7	22279	31298	22512.6	22665.4	26092.2	31077.2	23554.9	20016.5	35287.5	20014	35056.6	26011.1	23712.1	23704.3	24231.3
NEG_7542	4.409	463.092	Hyperoside	[M-H]-	C21H20O12	Phenylpropanoids and polyketides	Flavonoids	C10073	0.937	71311.3	53467.4	76466.8	66270.4	56733.3	68601.9	303456	242263	251162	274551	254955	250756	111066	103007	138267	99839	52451	44295.2	68185	41062.1	43190.5	41850.8	49988.7	40010.2	44530.3	44503.4	43566.9
POS_8334	4.415	529.143	Hypocrellin B	[M+H]+	C30H26O10				0.703	6854.05	7437.71	8177.11	6765.79	6289.4	7973.14	8219.9	8399.77	8128.23	8871.84	8057.55	7818.56	17806.9	18041.8	13429.8	20136.8	19843.2	7907.04	8802.84	8896.86	8979.42	8359.38	9478.44	10539	11515.7	10671.8	10796.3
POS_9366	4.417	575.206	Lyoniside	[M+Na]+	C27H36O12	Lignans, neolignans and related compounds	Lignan glycosides		0.783	18698.5	14545.1	20461	16627.9	12837.7	16925.5	7894.35	6446.83	5941.64	6887.91	6936.76	5974.77	9308.85	13663.7	13309.5	10593.8	15002.5	7831.4	8935	7664	7216.77	6660.28	8994.67	7746.33	7347.3	7657.86	7027.49
NEG_1059	4.424	177.056	Coniferyl aldehyde	[M-H]-	C10H10O3	Benzenoids	Phenols		0.865	526.146	1815.37	1135.04	1237.54	1632.76	915.97	10824.7	8703.61	9095.48	9013.6	8190.48	8842.55	16843.3	18409.8	19785.4	15699.6	20532.3	27729.6	32736.7	25870.5	27149.4	27319.3	31430.9	7638.93	9163.01	9156.12	8936.07
POS_5455	4.427	401.153	6-formyl-5-hydroxy-10-(hydroxymethyl)-3-methylidene-2-oxo-2H,3H,3aH,4H,5H,8H,9H,11aH-cyclodeca[b]furan-4-yl 2-methylbutanoate	[M+Na]+					0.785	17489.8	14715.2	15477	15602.9	16279.7	15247.8	19947.8	17180.7	16424.9	16958.2	17472.4	17121.7	48133	46415.2	52822.8	48207.2	52943.9	59977.6	64144.8	52495.7	53527.4	51968.6	63620.8	28728.2	28862.7	28863.1	28247.9
POS_1194	4.438	179.07	4-Hydroxy-3-methoxycinnamaldehyde	[M+H]+	C10H10O3	Benzenoids	Phenols	C02666	0.839	3686.42	3776.91	4553.26	4850.57	4158.11	4171.05	13344.9	11039.2	10505.8	9966.82	10812.4	12131.1	21021.7	22452.4	24863.5	20636.6	25398.1	27181.9	25900	20744.3	24673.8	22437.2	29469.3	12630.9	12382.3	13351.4	11412.9
NEG_13452	4.438	739.213	Apigenin 7-O-(2G-rhamnosyl)gentiobioside	[M-H]-	C33H40O19				0.839	24223.4	19877.9	22002.9	22337.5	16502.4	21236.3	11195.3	9761.99	10521	11081.3	11169.6	9942.73	12247.3	11679.6	13680.7	10879.3	15895.7	5342.18	5532.9	4787.68	4809.96	5120.17	5058.05	4793.95	4795	4978.22	4872.03
NEG_7426	4.456	459.132	(-)-Podophyllotoxin	[M+FA-H]-	C22H22O8				0.767	12262.4	9650.28	12249.9	11115.8	8950.22	10474.8	3641.18	3041.08	3068.47	2841.95	3178.08	3014.95	5740.74	6864.46	7396.27	5670.38	7556.52	4933.39	5027.27	3759.79	5108.78	4586.86	5343.21	2237.93	2363.64	2363.68	2343.16
NEG_4878	4.471	357.134	Pinoresinol	[M-H]-	C20H22O6	Lignans, neolignans and related compounds	Furanoid lignans		0.763	25535.4	20669.6	26881.4	25293.7	22276.3	23222.8	15990.5	14050	9377.67	15181.3	15635	15833.6	15195.2	14050.3	17048	13754.3	19943.4	33085.8	34150.2	34374.8	33672.1	28755.7	38660.3	8946.98	8054.58	8910.82	8944.23
NEG_9816	4.503	549.092	Flavonol base + 4O, O-MalonylHex	[M-H]-	C24H22O15	Phenylpropanoids and polyketides	Flavonoids	C12638	0.899	3.067e+06	2.2209e+06	3.15057e+06	2.92697e+06	2.43291e+06	2.78358e+06	271931	209919	226511	249181	218501	240036	766037	735465	965807	595922	1.21043e+06	291205	293363	254668	250095	236867	322212	169340	179520	170904	169280
NEG_8701	4.503	505.102	Quercetin-3-O-glucosyl-6''-acetate	[M-H]-	C23H22O13	Phenylpropanoids and polyketides	Flavonoids		0.94	1.82486e+07	1.424e+07	1.88264e+07	1.90535e+07	1.51617e+07	1.75676e+07	1.63944e+06	1.28751e+06	1.50512e+06	1.58199e+06	1.48277e+06	1.46589e+06	4.8002e+06	4.82423e+06	6.46362e+06	4.30904e+06	7.36859e+06	1.96569e+06	2.01408e+06	1.85622e+06	1.64888e+06	1.49941e+06	2.29989e+06	992088	972939	1.02408e+06	990445
NEG_6982	4.503	445.077	Quercitrin	[M-C6H10O4-H]-	C21H20O11	Phenylpropanoids and polyketides	Flavonoids	C01750	0.778	95212.6	81292.4	86059.1	89878.6	80763.5	99126.9	30479.8	27950.8	30641.7	29865.8	30774.5	28883.2	48417.2	44439.4	58177.7	44613.5	56296.9	34985.6	32351.9	35446.1	30389.3	30621.8	37504.3	22951.9	22150.5	23925.8	22755.4
POS_8894	4.504	551.105	Quercetin 3-O-malonylglucoside	[M+H]+	C24H22O15	Phenylpropanoids and polyketides	Flavonoids		0.871	609657	501223	705349	582939	540073	544721	177030	145761	154512	151772	150856	159321	335837	323342	402212	334895	445350	201845	215059	185637	181262	163492	229697	237039	234631	244580	235940
NEG_14001	4.504	771.195	Flavonol base + 4O, O-Hex-Hex, O-dHex	[M-H]-	C33H40O21	Phenylpropanoids and polyketides	Flavonoids		0.791	8759.93	10582.2	4126.67	4461.76	12958.7	7755.2	4027.62	3755.42	5479.89	1484.59	4783.99	4449.28	19259.3	18123.3	16605.1	13802.4	19786.6	4698.42	5121.15	5637.42	4327.6	3827.53	4671.49	2825.71	2978.86	1943.87	3148.58
NEG_8627	4.507	503.082	Hypericin	[M-H]-	C30H16O8	Benzenoids	Pyrenes		0.748	43768.3	38930.8	48444.7	50191.8	39660.1	45433.1	12845.1	11107.5	12681.7	12990.1	12524.7	12751	15043	17281.3	22029.1	16434.9	22742.6	19076.3	16395.4	15074.9	9465.48	13421.4	19431	6564.02	5885.34	7063.36	6434.14
POS_2304	4.509	247.13	Desacetoxymatricarin	[M+H]+	C15H18O3	Organoheterocyclic compounds	Lactones		0.72	1129.64	1057.42	1033.63	1253.67	841.753	1226.42	394.57	2888.47	2772.68	2017.75	1002.39	1536.07	1899.42	3559.43	1514.63	1319.6	3240.9	56216.6	62032.4	51256	56745.8	52311.2	62726.4	11914.4	11916.9	12096.7	12176.1
NEG_3451	4.515	299.021	Demethylwedelolactone	[M-H]-	C15H8O7				0.791	93588.1	94452.7	127023	129504	109850	232215	70942.7	48854.8	70143.1	86953.6	68572.9	65335.2	164845	81984.9	107234	76876.4	227359	39762.3	40040	36685.7	33304.9	25029.7	41463.8	22369.1	19009.7	21959.1	22248.3
NEG_9093	4.518	519.173	Pinoresinol 4-O-glucoside	[M-H]-	C26H32O11				0.746	58179.7	57732.1	50050.9	55771.6	55942.4	46338.1	10390.6	22689.9	9584.26	5586.78	25400	25957.9	28317.1	27690.4	26782.8	14942.8	23484	45130.2	24273.5	44980.6	45770.9	25066.6	47197.1	12320.2	15925.6	5596.8	13384.4
NEG_7046	4.52	447.089	Maritimein	[M-H]-	C21H20O11	Phenylpropanoids and polyketides	Flavonoids		0.899	521827	460307	530653	575083	563584	566656	34004	31000.2	35242.4	32128.4	31682.1	31110.1	219659	224314	246198	221300	240346	48251.3	57975.9	54441.3	45155	40561.4	52205.2	127960	132279	104152	133458
POS_9809	4.539	597.23	Toosendanin	[M+H]+	C30H38O11				0.818	34948.1	32920.8	37691.3	35711.8	35893.8	30185.5	27688.1	21138.7	27783.4	25792.5	26214.2	24500.4	168679	157057	190137	167521	204373	36103.4	39766.8	36809.4	33012.5	31733.6	40613.1	50460.8	46682.3	47788.7	47226.8
POS_6510	4.541	449.109	Luteolin-4'-o-glucoside	[M+H]+	C21H20O11	Phenylpropanoids and polyketides	Flavonoids		0.919	161593	66973.1	236536	159018	134931	139482	4683.81	4063.59	4149.68	3003.39	2491.96	2564.11	36880.3	21214.7	53664.9	52625.7	42235.7	1580.53	2421.75	1571.43	1480	1407.4	2576.03	17467.5	17191.1	17469.1	15219.9
NEG_11126	4.563	609.177	Hesperetin-7-O-rutinoside	[M-H]-	C28H34O15				0.912	192889	1.35603e+06	356708	639628	9.06505e+06	154434	67756.3	52234.9	38112.7	205324	25300.8	11110.8	423415	758776	284044	6.09757e+06	176193	14044.1	95219.9	50209	36583.1	236434	36701.8	421957	77119.5	463882	70791.2
POS_7328	4.57	487.215	(1R,2S,4R,5R)-5-Hydroxy-1,7,7-trimethylbicyclo[2.2.1]hept-2-yl 6-O-[(2R,3R,4R)-tetrahydro-3,4-dihydroxy-4-(hydroxymethyl)-2-furanyl]-beta-D-glucopyranoside	[M+Na]+	C21H36O11	Lipids and lipid-like molecules	Prenol lipids		0.822	11160.2	11869.5	24081.6	19887.8	11979.6	11530.6	30171.1	31996.7	32950.1	31367.1	35942.1	30003.2	521872	501366	539790	548247	657400	1.00584e+06	1.06656e+06	1.08674e+06	981626	925128	1.07711e+06	293474	188540	293728	281773
POS_6079	4.571	429.171	Isolupalbigenin	[M+Na]+	C25H26O5	Phenylpropanoids and polyketides	Isoflavonoids		0.775	98545	73633.6	122734	84244.5	75481.8	88224.3	19993.6	14358.3	16449.5	18048.4	18249.5	17592.9	101610	97503.8	141915	101831	153047	24950.9	24546.4	17998.7	17507.4	16132.8	28309	35320.4	34849.7	34041.7	36269.4
NEG_11809	4.576	645.12	Quercetin 5-Glc-Rha	[M+Cl]-	C27H30O16	Phenylpropanoids and polyketides	Flavonoids	C17563	0.844	37041.6	24228.9	32911.1	30217.1	6744.05	40932.1	1475.56	1617.52	938.631	648.891	1074.08	1437.52	20477.3	22108.6	26748.4	14775.4	22483	1689.2	2247.32	1790.43	1803.73	1792.37	2144.07	3025.5	3235.84	2241.51	3795.32
NEG_11429	4.577	625.14	Quercetin-3,4'-O-di-beta-glucoside	[M-H]-	C27H30O17				0.808	137755	107942	121934	142120	118035	144894	9816.91	9597.03	11182.4	6320.74	10031.3	8617.23	113632	111011	102342	106814	120730	23544.4	28759.2	30148	31004.5	20745.1	31230.8	32782.6	30634.2	33909.5	33310.6
POS_6623	4.582	453.17	4'-O-b-D-Glucosyl-5-O-methylvisamminol	[M+H]+	C22H28O10	Organoheterocyclic compounds	Benzopyrans		0.845	6725.38	2514.56	7403.79	6126.71	4944.61	6008.28	27404.5	24873.9	30068.6	31273.5	27460.9	26464.2	53864.9	53010.8	59875.5	55098.1	66510.9	8238.53	8218.37	8511.67	7781.82	6965.61	9585.4	20133.9	19838.1	18225.6	20136.4
POS_7827	4.583	507.207	Verrucarin J	[M+Na]+	C27H32O8	Lipids and lipid-like molecules	Prenol lipids		0.731	56446.9	40307.7	69410.5	55998.6	46923.3	38911.7	2175.98	2343.74	1976.88	1790.88	1633.5	1444.57	4564.03	5117.72	7262.29	5462.82	6082.52	2361.2	2118.25	1607.44	1866.33	2173.69	1414.77	5344.73	4907.81	5327.09	5345.4
POS_3227	4.586	303.051	Quercetin	[M+H]+	C15H10O7	Phenylpropanoids and polyketides	Flavonoids	C00389	0.942	846023	775302	989237	799421	714190	765797	111194	86632.2	102260	93624.6	99045.7	94928	651722	629512	799701	618026	868811	114529	120635	103774	82708	86371.1	124382	301240	288764	288752	291521
POS_7044	4.587	473.196	6-[(4E,6E)-2,3-Dihydroxy-4,6-dimethyl-7-(2,4,5-trimethyl-3,6-dioxabicyclo[3.1.0]hexan-2-yl)hepta-4,6-dien-2-yl]-4-methoxy-3,5-dimethylpyran-2-one	[M+K]+	C24H34O7	Lipids and lipid-like molecules	Fatty Acyls		0.745	177222	103098	250672	157574	114312	130573	19843.6	17685.2	19132.9	19313.9	18865.4	19052.7	66680.3	59789.9	98837.9	54040.4	119026	35302.9	37222.7	23201.8	28169.6	23999.6	36407.3	27115.2	24317.8	26669.1	26348.7
NEG_11423	4.605	624.997	Quercetin 3,4'-diglucoside	[M-H]-	C27H30O17	Phenylpropanoids and polyketides	Flavonoids		0.84	34177.2	24049.1	29555.4	18654.3	30627.2	33213.9	9298.1	5755.74	8245.21	7212.84	8128.89	7850.94	35142.1	23743.3	31329.5	27810.5	35834.9	3296.17	4356.47	4618.69	4204.42	4003.32	4796.91	7090.8	7652.23	7309.54	8205.45
NEG_7541	4.607	463.089	Isoquercitrin	[M-H]-	C21H20O12	Phenylpropanoids and polyketides	Flavonoids	C05623	0.971	6.46145e+06	6.14592e+06	6.01108e+06	7.05229e+06	6.68024e+06	6.73993e+06	2.4843e+06	2.29653e+06	2.45056e+06	2.46553e+06	2.24628e+06	2.22637e+06	5.5264e+06	5.32969e+06	5.52083e+06	5.35676e+06	5.82287e+06	1.01475e+06	1.12202e+06	1.00864e+06	1.19782e+06	959787	1.29681e+06	1.79433e+06	1.79518e+06	1.88758e+06	1.80008e+06
NEG_7980	4.613	479.079	Myricetin-3-Galactoside	[M-H]-	C21H20O13	Phenylpropanoids and polyketides	Flavonoids		0.715	19585.4	12413.6	20680	17383.9	14803.2	19494.8	9143.41	8182.17	9019.27	9823.36	8800.23	8712.92	15308.4	16056.2	20660.7	13597.8	19154.4	4625.98	6083.5	5274.37	4937.09	4305.9	6479.1	5387.11	5408.6	4838.6	5408.94
NEG_3195	4.642	287.063	(2S,3S)-3,4',5,7-Tetrahydroxyflavanone	[M-H]-	C15H12O6	Phenylpropanoids and polyketides	Flavonoids		0.918	265174	219908	260626	247662	230062	240856	495035	439475	464456	501897	449093	454168	249832	207613	258174	215089	269465	103990	106303	100804	119012	97734.7	121364	136324	151464	150913	151261
POS_405	4.648	128.106	N-Cyclohexylformamide	[M+H]+	C7H13NO	Organic acids and derivatives	Carboxylic acids and derivatives		0.821	123511	104281	116702	126536	108715	110095	120311	109806	116227	117367	127480	177401	105164	151477	106021	99290.7	109849	178715	107824	136698	182409	104349	179531	145189	116764	118415	116856
NEG_6754	4.66	435.132	Coatlin A	[M-H]-	C21H24O10	Phenylpropanoids and polyketides	Linear 1,3-diarylpropanoids		0.753	1.43977e+06	1.26476e+06	1.52378e+06	1.43305e+06	1.39852e+06	1.36856e+06	44360.3	36575.8	39855	43345	38159.6	37093.4	987175	801868	1.04992e+06	859412	1.15487e+06	104597	110987	95656.7	114387	89689.3	128821	187548	213836	209083	213429
NEG_7124	4.669	449.109	Eriodictyol-7-O-glucoside	[M-H]-	C21H22O11	Phenylpropanoids and polyketides	Flavonoids		0.839	55881.4	50000.6	64636.6	54085.6	55344.3	54026.4	5855.09	5245.49	4342	2874.8	5410.73	5115.43	53190.4	48166.6	64553	51662.8	75381.6	8491.87	10427.5	8837.13	8857.41	8813.93	11200.2	13395.8	14235.8	14257.6	13949.5
NEG_9169	4.671	521.204	3-[[2,3-Dihydro-2-(4-hydroxy-3-methoxyphenyl)-3-(hydroxymethyl)-7-methoxybenzofuran]-5-yl]propyl beta-D-glucopyranoside	[M-H]-	C26H34O11	Phenylpropanoids and polyketides	2-arylbenzofuran flavonoids		0.754	6864.15	6565.9	7689.88	6453.62	6754.16	6060.43	5723.22	4938.62	5275.01	4003.9	6240.65	4905.81	7873.75	7196.52	8139.48	7724.83	10432.9	20073.5	20331.1	18648.3	21417.2	18929.1	21732.1	4495.7	4496.75	4560.59	4560.19
POS_6700	4.688	457.236	Vindoline	[M+H]+	C25H32N2O6				0.797	14327.8	14640.6	14305	14278.4	13458.8	12450.3	39062.3	28325.3	31910.1	35419.1	29591.7	31926.5	69996.5	66990.9	81821.7	65698.6	83028.4	121581	120961	112591	94299.7	93111.7	129582	42943.6	48696.9	45617.1	46279.6
NEG_6682	4.695	433.08	Avicularin	[M-H]-	C20H18O11	Phenylpropanoids and polyketides	Flavonoids		0.86	43783.8	52049.1	117060	48176.4	95185.4	57356	8762.94	7293.01	7562.71	6447.44	6782.1	7313.04	37406.8	38715.2	43560.3	28168.4	73415.3	12967.1	3512.92	12310.7	12468.5	13441.8	12962	16178.8	21345.9	20359.7	21060.5
POS_1233	4.71	182.19	Dicyclohexylamine	[M+H]+	C12H23N	Organic nitrogen compounds	Organonitrogen compounds		0.964	94524.2	76391	83368.3	99530.6	84924.8	79763.1	90156.6	80881	94660.3	92849.8	92629.4	136002	84326.9	115166	84118.6	77552.3	82452.9	138243	93308.3	98699	133805	76205.6	141456	112932	94135.2	94055.6	94196.3
POS_7125	4.712	477.134	Cirsimarin	[M+H]+	C23H24O11	Phenylpropanoids and polyketides	Flavonoids		0.715	10146.5	10185.7	11244.8	10317.5	9462.56	9264.94	2800.72	2059.53	2290.29	2284.43	2378.53	2111.5	1630.33	1594.8	1496.16	1309.85	908.578	852.482	961.627	603.962	663.297	525.421	636.673	2858.48	3134.8	2627.64	3048.35
NEG_4107	4.714	326.233	3-Hydroxy-N-(2-oxooxolan-3-yl)tetradecanamide	[M-H]-	C18H33NO4	Organic acids and derivatives	Carboxylic acids and derivatives		0.734	6674.61	6382.07	6888.49	7427.74	7291.87	7334.45	11952.6	11618.2	11297.4	11501.3	10549.7	11214.9	44753.4	37609.5	43654	38061.8	48956.3	11984	12850.1	12590.1	12940.1	12377	14237.5	9152.71	7766.82	9141.43	9140.76
POS_1074	4.719	172.094	N-Butyrylhomoserine lactone	[M+H]+	C8H13NO3	Organic acids and derivatives	Carboxylic acids and derivatives	C11837	0.74	190695	319000	173873	359138	132515	105894	133586	116005	168235	264198	309844	358092	107612	191456	258551	126158	99768.4	162875	180633	218151	90866.7	58004.4	123409	93147.3	269986	238337	257540
POS_8369	4.724	531.163	Xolegel	[M+H]+	C26H28Cl2N4O4	Organoheterocyclic compounds	Diazinanes		0.811	9827.37	10096.1	9885.5	9607.14	8974.67	9464.41	8038.39	7136.5	8387.78	8478.86	5886.69	8393.41	23000.4	20296.4	20572.6	22610.6	20626.2	18529	14154.2	19987.4	17545.3	16792.4	17439.5	13540.4	14658.5	13577	14448.8
POS_8101	4.742	519.239	[(2R,3S,4S,5R,6S)-3,4,5-Trihydroxy-6-[(2S,3R,4S,5S,6R)-3,4,5-trihydroxy-6-(hydroxymethyl)oxan-2-yl]oxyoxan-2-yl]methyl 8-methylnonanoate	[M+Na]+	C22H40O12	Lipids and lipid-like molecules	Saccharolipids		0.794	6662.64	5932.33	7087	9449.05	5778.59	6719.54	55564.9	40999.1	47743.7	51453.5	46110.2	50552.8	25788.8	28529.2	36635.8	25199.8	21806.4	29091.2	27115	24507.8	22541.5	15992.7	27345.2	20030.2	27246.9	18615.2	20919.3
POS_5734	4.742	413.176	Erysubin F	[M+Na]+	C25H26O4	Phenylpropanoids and polyketides	Isoflavonoids		0.785	4600.74	2696.85	5032.53	3658.2	5053.87	3697.58	8215.14	4381.08	6328.53	10260.1	5590.29	7468.77	2985.48	4525.68	3037.4	3037.19	3933.89	29960.8	26547.7	25618.3	24319.5	22768	28354.3	7782.64	8027.2	7142.27	8947.77
NEG_6686	4.757	433.111	Flavanone base + 3O, O-Hex	[M-H]-	C21H22O10	Phenylpropanoids and polyketides	Flavonoids		0.892	98902.2	74291.1	104954	89344.9	77364.3	85295.8	24221.2	22133.9	22200.1	12230.9	23892.9	25961.3	132594	110190	162886	98447.1	181011	35932.8	35517.3	30042	33313.4	30952.7	39004.3	37934.4	41308.9	32782.8	44061.1
NEG_12189	4.759	665.283	Syrosingopine	[M-H]-	C35H42N2O11	Alkaloids and derivatives	Yohimbine alkaloids		0.71	14322.7	12484.1	15938.8	13362.9	13074.4	13578.2	4894.78	4425.66	4514	5032.05	4372.52	4513.87	24943.7	22244	28357	21339.7	33984.3	5809.08	5133.62	4469.5	5043.03	5697.14	5915.32	4833.21	5201.27	4926.58	4874.84
POS_6561	4.764	451.155	2-Phenylethyl 3-O-(4-carboxy-3-hydroxy-3-methylbutanoyl)-beta-D-glucopyranoside	[M+Na]+	C20H28O10	Lipids and lipid-like molecules	Saccharolipids		0.769	2380.3	1603.81	2903.39	2388.64	1920.18	2190.95	2286.71	2493.5	1468.9	1014.43	1276.57	2910.39	18474.3	18284.3	23299.6	17047.1	21691.1	3197.35	8832.99	7547.44	7194.58	7105.73	7144.16	5923.23	6726.74	6419.64	6392.95
NEG_1673	4.766	217.043	2-Benzyl-4-chlorophenol	[M-H]-	C13H11ClO	Benzenoids	Benzene and substituted derivatives		0.818	38404.2	32607.5	43346.2	37147.9	34061	33957	43997.4	35495	40707.5	40967.3	38768.7	40889.4	43165.1	42390.8	53249.5	38468.6	58780.1	44790.9	45759.1	39862.6	41898.8	35537.9	52428.4	19217.9	18224.8	19217.9	19102.9
POS_5523	4.768	405.151	Neosolaniol	[M+Na]+	C19H26O8	Lipids and lipid-like molecules	Prenol lipids		0.736	5931.17	4395.77	5975.89	5502.02	4662.79	5104.86	6527.4	5255.5	5525.21	6104.65	5358.39	6349.22	4007.53	4534.02	4482.94	4576.86	4695.78	7488.65	6371.75	6525.34	5616.81	6227.79	6856.2	4522.82	4523.22	4782.14	4522.94
POS_895	4.785	160.074	Indole-3-acetaldehyde	[M+H]+	C10H9NO	Organoheterocyclic compounds	Indoles and derivatives	C00637	0.752	9934.87	10572.7	11615.5	9377.81	10518.3	9389.18	16379.2	13298.1	12028.1	12955.4	11897.7	12657.2	4458.75	4800.87	5605.63	4809.18	6551.45	4290.48	3946.09	2495.78	1628.95	2157.33	2260.27	6014.47	7120.71	6266.35	6008.29
POS_7676	4.79	501.172	[3,4,5-Trihydroxy-6-[(3,4,5-trihydroxyoxan-2-yl)oxymethyl]oxan-2-yl] 2,6,6-trimethylcyclohexene-1-carboxylate	[M+K]+	C21H34O11	Organic oxygen compounds	Organooxygen compounds		0.725	13861.6	9418.53	16831.3	11474.3	10669.7	10604.7	6772.75	5378.73	6662.08	5603.66	6217.65	5570.33	4220.17	4105.94	5499.32	4044.18	4387.37	12735.4	14376.4	12577.2	12236.1	12297.9	14106.9	5272.45	5379.43	4496.95	5375.83
NEG_588	4.792	151.04	Vanillin	[M-H]-	C8H8O3	Benzenoids	Phenols	C00755	0.843	14668.2	13866.6	15863.5	13674.5	12569.8	14324.8	3871.45	4623.64	3998.71	4122.52	4294.3	3661.65	20871.4	20153.5	25512.5	20201.3	26129.3	4935.8	4658.09	6118.65	5696.48	4518.51	5900.39	5663.71	6830.99	6173.99	6595.75
NEG_15587	4.807	915.261	3-[(2S,3R,4S,5S,6R)-4,5-Dihydroxy-3-[(2S,3R,4R,5R,6S)-3,4,5-trihydroxy-6-methyloxan-2-yl]oxy-6-[[(2S,3R,4R,5R,6S)-3,4,5-trihydroxy-6-methyloxan-2-yl]oxymethyl]oxan-2-yl]oxy-5-hydroxy-2-(4-hydroxyphenyl)-6-methoxy-7-[(2S,3R,4R,5R,6S)-3,4,5-trihydroxy-6-methyloxan-2-yl]oxychromen-4-one	[M-H]-	C40H52O24	Phenylpropanoids and polyketides	Flavonoids		0.726	36958.1	28320	41388.2	33886.3	30806.4	33634.7	7258.35	5302.47	7158.69	6602.01	6725.98	5722.25	6455.78	6915.25	9081.09	6589.03	10342.9	4178.6	4354.27	3803.93	3422.84	3560.6	4510.71	6858.37	7059.57	6842.35	6841.65
POS_5690	4.841	411.194	4-[3-(Beta-D-glucopyranosyloxy)-4-hydroxy-2,6,6-trimethyl-1-cyclohexen-1-yl]-2-butanone	[M+Na]+	C19H32O8	Lipids and lipid-like molecules	Prenol lipids		0.83	30550.1	33050.8	39326.3	24133.5	28668.6	18376.8	101166	8055.78	56221.2	13874.6	52616.8	62541.2	4462.23	5635.4	9349.74	32230.9	9072.48	13125.2	33939.1	9546.94	31059.2	26120.9	19227.8	13402.9	32964.5	13896	16235.6
NEG_9789	4.896	547.239	4-[(E)-3-[(2R,3R,4S,5S,6R)-3-[(2S,3R,4R)-3,4-Dihydroxy-4-(hydroxymethyl)oxolan-2-yl]oxy-4,5-dihydroxy-6-(hydroxymethyl)oxan-2-yl]oxybut-1-enyl]-3,5,5-trimethylcyclohex-2-en-1-one	[M+FA-H]-	C24H38O11	Lipids and lipid-like molecules	Fatty Acyls		0.765	28236.6	22119.5	31139.7	27568.5	23567	23885.2	45134.8	36471.8	37434.4	27572.6	42072.2	43352.3	103913	98062	133996	95263.2	137582	162787	174177	145174	143360	129362	178971	38284.2	40544.5	37143.2	38674.9
POS_8732	4.928	545.181	2-(Hydroxymethyl)-6-[5-[3-(hydroxymethyl)-5-(3-hydroxypropyl)-7-methoxy-2,3-dihydro-1-benzofuran-2-yl]-2-methoxyphenoxy]oxane-3,4,5-triol	[M+Na]+	C26H34O11	Phenylpropanoids and polyketides	2-arylbenzofuran flavonoids		0.76	3115.68	579.174	2009.18	1188.68	1424.93	413.077	3669.75	3637.12	4194.98	5313.32	2854.89	4767.47	28948.4	17711.6	24111.4	19102.6	21565.4	11288.3	11690.9	10219.8	11643.9	10027.1	10528.9	8632.94	10168.6	8165.13	8832.63
NEG_6616	4.928	431.101	Cosmosiin	[M-H]-	C21H20O10	Phenylpropanoids and polyketides	Flavonoids	C04608	0.906	34450.4	34092.5	30186.3	37305	32128	36794.2	9088.38	8334.88	7953.03	8454.97	8925.19	8288.98	25586.1	24547.3	25164.3	22258.8	28443	7282.91	6680.41	6632.06	7049.28	6962	6986.29	10839.9	11455	11375.5	11451.2
NEG_2637	4.944	269.048	Genistein	[M-H]-	C15H10O5	Phenylpropanoids and polyketides	Isoflavonoids	C06563	0.812	18254.7	16628.4	18901	18559	16227.6	17441.5	4522.18	3791.24	4013.09	3915.22	3960.2	3982.35	7899.19	6848.62	9273.67	6871.43	8612.39	1463.19	2148.08	1524.41	2081.42	949.622	2275.83	3992.84	4570.11	4565.45	4564.4
POS_8492	4.947	535.107	Flavone base + 4O, O-MalonylHex	[M+H]+	C24H22O14	Phenylpropanoids and polyketides	Flavonoids		0.804	76922.5	71370	85097.7	68329.3	69899.4	70058.9	50202.8	34645.8	46845.8	39739.6	42984.1	46600.1	64221.6	62988	76187.6	64216.3	80711.6	29316.4	30963.6	23257.9	23989.4	20339.9	27002	37511.6	42948.6	37152.6	39575.1
NEG_7127	4.95	449.11	Flavanomarein	[M-H]-	C21H22O11	Phenylpropanoids and polyketides	Flavonoids		0.921	320607	248477	334679	302566	235973	270341	20401.2	20764.6	18581.5	34623.7	26385.5	22777.7	182264	169631	238901	157316	260597	25450.1	25784	22374.9	21208.4	21715.5	26222.6	41003.8	44527.3	43743.6	44495
NEG_6753	4.952	435.132	Phlorizin	[M-H]-	C21H24O10	Phenylpropanoids and polyketides	Flavonoids	C01604	0.792	76055.7	59689.1	78533.3	77147.5	57160.1	68868.9	7803.92	6429.08	6195.13	7218.94	7361.56	5941.28	47957.4	43172.7	61131.3	40493	30890.8	18953.1	19736.5	16845	16530.7	16341.8	20258.5	12172.5	13166.8	12974.8	13133.3
POS_8338	4.955	529.256	Chaetoglobosin C	[M+H]+	C32H36N2O5	Alkaloids and derivatives	Cytochalasans		0.727	7244.28	4960.32	7619.23	3932.82	2163.42	4716.16	2339.24	7030.02	6379.38	1842.75	1688.61	1057.13	77367.6	75340.8	94032.1	77957.5	83436.3	84708.5	88756.7	77565.4	75830.3	69683.8	80419.7	37280.9	40219.8	39431.4	41018.4
POS_5416	4.956	399.144	Ailanthone	[M+Na]+		Lipids and lipid-like molecules	Prenol lipids		0.767	1894.83	2024.42	2591.14	1970.74	2496.89	1804.3	4408.25	4148.27	3435.03	3404.32	3578.76	3566.49	19251	24385	23872.9	19800.8	25169.8	12454.4	13798	11547.1	11157.4	11057.6	12340.8	7475.33	8644.89	6097.47	7718.65
POS_797	4.97	153.136	10-Hydroxydecanoic acid	[M-2H2O+H]+	C10H20O3	Organic acids and derivatives	Hydroxy acids and derivatives	C02774	0.704	26492.7	28953	26679.8	37820.8	25854.1	26128.5	31834.2	31380.6	30283.9	25605.6	32071.6	39067	32841.3	37659.5	40175.6	33509.7	41875.1	47261.7	34915.4	33555.9	39308	27537.4	47677.7	35763.2	34518.5	33382	33382.8
NEG_10778	4.99	593.15	Kaempferol-3-Glucoside-3''-Rhamnoside	[M-H]-	C27H30O15	Phenylpropanoids and polyketides	Flavonoids		0.95	1.2612e+06	967524	1.23817e+06	1.18188e+06	906319	1.09553e+06	463325	358944	408832	412135	417722	420390	1.34526e+06	1.24668e+06	1.6639e+06	1.12943e+06	1.84112e+06	221951	235485	214066	199386	188275	236951	284514	298288	294300	298135
POS_12025	4.992	743.288	Ritonavir	[M+Na]+	C37H48N6O5S2	Organic acids and derivatives	Carboxylic acids and derivatives	C07240	0.734	9163.48	5016.89	9728.72	7977.94	7917.38	7980.09	6344.77	5125.96	4869.14	5764.35	5331.08	4742.87	38230.7	37153.2	46232.3	32205.4	39645.7	33779.5	5535.03	22698.1	4914.33	5712.8	5892.67	10321	10639.7	10330	11968
NEG_10773	4.992	593.129	Tiliroside	[M-H]-	C30H26O13	Phenylpropanoids and polyketides	Flavonoids		0.941	88199.8	73715.3	84974.2	104225	57635.5	130990	18463.9	30520.1	10994.1	7900.95	14452.7	32484.5	97633	101661	97011.6	45477.9	115115	27138.1	11776.9	9520.96	21680.5	9493.28	17703.5	23493.7	26369.9	11392.3	31753
POS_2950	4.994	287.054	Kaempferol	[M+H]+	C15H10O6	Phenylpropanoids and polyketides	Flavonoids	C05903	0.887	36950.7	34393	43395	33635.9	33688.7	33423.3	25596	19131.5	24308.2	18430.8	22237.5	24781.1	42214.5	46208.2	52789.5	45979.1	60430.8	10435.2	11045.2	9438.59	8933.9	9468.63	11442.9	22610.6	23625.2	22858.2	24469.2
NEG_7486	4.994	461.11	Hispidulin 4'-glucoside	[M-H]-	C22H22O11	Phenylpropanoids and polyketides	Flavonoids		0.852	61469.6	53324.7	55486	61618	50309.5	60395.1	2297.72	1915.2	1839.27	1388.98	2026.41	1836.01	8759.2	8042.71	9920.27	8130.83	10023.8	3007.06	3233.67	3401.7	3416.31	2982.93	2886.74	9979	10018.2	10169.4	10218.6
POS_4310	4.996	353.133	3-(4-Hydroxyphenyl)propanoic acid 3-(4-hydroxy-3-methoxyphenyl)propyl ester	[M+Na]+	C19H22O5	Benzenoids	Phenols		0.854	240.027	200.564	211.321	126.286	194.816	526.726	2620.68	2602.47	2520.83	2308.12	2690.94	2639.38	28488.5	23793	33751.9	30704	37081.4	7869.44	8764.06	6605.64	6068.62	6690.15	8799.33	7222.65	7373.97	7378.4	6748.3
NEG_7059	5.011	447.096	Cyanidin 3-O-glucoside	[M-2H]-	[C21H21O11]+	Phenylpropanoids and polyketides	Flavonoids		0.928	587804	434015	553882	535579	429844	517302	607566	479598	553569	576630	563141	571704	372975	346400	448325	312989	485671	119376	130900	114521	111073	100672	125772	160686	176049	172666	177149
NEG_1215	5.038	187.098	Hydron;nonanedioate	[M-H]-	C9H16O4	Lipids and lipid-like molecules	Fatty Acyls		0.86	49945	44849.6	49997.2	49567.7	42789	46871.1	67044.4	53549.8	59250.3	60762	59049.8	68505.8	53832.9	60940.6	64669.6	49378.8	65222	67913.4	63440.2	54516.2	60794.2	51060.6	70650.2	37321.9	32730.3	37009	36065.5
POS_7374	5.039	489.222	Cytidine 5'-diphosphocholine	[M+H]+	C14H26N4O11P2	Nucleosides, nucleotides, and analogues	Pyrimidine nucleotides		0.765	4042.3	3721.75	4523.98	4563.7	2734.76	4645.14	22693.8	19254.4	21791.4	22849.2	23818.4	25711.1	17559.5	25972.7	28001.3	10354.9	32760	11847	15779.1	10074.3	10538.3	11552.9	14395.4	14000.6	14030.8	18345.3	14063.2
POS_5324	5.068	395.11	Alantrypinone	[M+Na]+	C21H16N4O3	Organoheterocyclic compounds	Pyridopyrimidines		0.795	78.8398	24.7194	149.383	125.23	32.6946	52.1977	4199.46	1923.25	2026.18	3675.99	3896.28	2249.56	14909.2	15098.8	18698.3	17520.3	20051.4	20056.7	20435.4	18203.5	15872.9	15632.3	19316.2	7461.35	10432.9	7462.28	7832.03
NEG_11393	5.068	623.161	Narcissin	[M-H]-	C28H32O16	Phenylpropanoids and polyketides	Flavonoids		0.896	7099.32	4936.69	5711.39	5176.33	4544.76	5320.69	3717.09	3167.84	3026.21	1778.78	3450.77	3271.13	29895.8	27989.9	32390.4	24321.2	35589.9	10634.4	10240.1	10628.9	10689.7	9644.39	10813.2	4887.09	4996.1	4962.1	5011.93
POS_3546	5.07	321.13	[2-[(E)-3,4-Dihydroxypent-1-enyl]-6-oxooxan-3-yl] (E)-2-methylbut-2-enoate	[M+Na]+	C15H22O6	Organoheterocyclic compounds	Lactones		0.791	10632.1	9292.62	4055.75	9245.87	11746.5	12219	9953.42	7175.26	11178.4	9184.8	10152	10480.2	10702.1	11974.7	11699.4	11555	13090.6	13551.1	11564.1	10160.5	13751	9644.31	13050.3	14992.4	13144.4	13471.8	13164
POS_9730	5.086	592.349	Alkergot	[M+H]+	C33H45N5O5	Alkaloids and derivatives	Ergoline and derivatives		0.828	5043.35	11374.3	13600.8	11728.8	11050.9	7174.29	13582.6	9202.62	10916.3	15397.3	12486.7	7704.22	1491.69	1681.53	2457.55	1791.61	2945.73	992.123	1207.37	1024.81	1099.63	819.473	1261.29	7915.14	8603.08	5819.56	8202.91
POS_5079	5.093	383.149	Loratadine	[M+H]+	C22H23ClN2O2	Organoheterocyclic compounds	Benzocycloheptapyridines	C06818	0.772	851.535	887.086	1697.99	512.957	805.398	316.897	5708.63	4669.35	4769.7	4797.25	4627.17	6826.79	21502.8	20539.7	25337.2	24955.5	26729.9	36179	39374.6	36954.2	32590.7	34459.1	40086.8	14379.4	17667.6	14674.2	15073.7
POS_5374	5.134	397.22	3,5,5-Trimethyl-4-[3-[(beta-D-glucopyranosyl)oxy]butyl]-3-cyclohexen-1-ol	[M+Na]+	C19H34O7	Lipids and lipid-like molecules	Fatty Acyls		0.821	8845	6802.44	10063.1	8135.02	6762.12	6545.6	9884.7	8578.86	8386.07	8989.07	5779.7	10232.4	17921.7	19626.1	16335.4	15380.1	26050.9	7234.1	5573.93	4913.23	6280.05	3858.03	8717.02	7903.71	6910.09	7325.67	7058.9
POS_9764	5.141	594.302	Ergocristam	[M+H]+	C35H39N5O4	Alkaloids and derivatives	Ergoline and derivatives		0.728	9517.89	7042.48	9951.82	5162.02	9017.34	7403.15	20509.4	20421	15938.6	12217.8	19765.5	20019	2594.77	2674.05	3808.78	2482.51	3959.3	837.238	1338.65	1166	759.525	1047.78	1660.72	7029.37	5503	6776.47	6596.54
NEG_6752	5.141	435.132	Dihydrostilbene base + 3O, 1carboxy, O-Hex	[M-H]-	C21H24O10	Phenylpropanoids and polyketides	Stilbenes		0.837	518297	394190	520679	493040	368601	471328	3465.78	3989.85	4271.44	3611.26	4474.78	4829.58	196327	164408	226894	157189	234331	30305.1	32228.8	28891	28129.8	25487.3	31294.1	66152.9	75962.7	72813.8	79379.2
NEG_6269	5.148	417.12	Liquiritin	[M-H]-	C21H22O9				0.876	20843.3	15942.7	20685	20372.7	15126.6	17798.8	5670.16	4510.21	4762.09	4348.05	5609.93	5393.76	13273.2	10860.2	16348	11510.3	15552.6	4605.82	5372.82	4707.07	5045.53	4211.65	4372.09	5496.95	7175.23	6908.15	7160.33
POS_5691	5.15	411.196	gamma-Tocotrienol	[M+H]+	C28H42O2	Lipids and lipid-like molecules	Prenol lipids	C14155	0.815	32676.5	25354.3	25807.5	28748.7	25371.4	31489.8	15018	13971.6	15762.2	15339.2	14278.3	14779	9146.95	7250.07	7884.2	9020.22	8380.61	8670.9	8467.69	7868.69	9260.73	12415.2	8312.49	12075.6	11967.6	11982.7	13138.9
POS_1675	5.161	215.124	Harmaline	[M+H]+	C13H14N2O	Alkaloids and derivatives	Harmala alkaloids	C06536	0.714	60549.1	63281.9	59460.6	61715.1	51329.1	49826.7	52035.6	51720.1	53670.8	70663	46741	48235.1	57813.2	25111.9	52970.1	33674.2	58301.4	34079.6	54743.3	21625.5	52984.3	75013.9	61140.5	44749.9	55885.8	46424.5	47626.9
POS_3622	5.203	325.163	Citalopram	[M+H]+	C20H21FN2O	Benzenoids	Benzene and substituted derivatives	C07572	0.76	7984.66	6887.43	8386.95	7558.99	7107.25	7356.16	12803.6	12787.1	13474.3	14453.3	15729.7	15118.8	10315	10308	8910.47	7623.14	8810.5	23720.4	22770.5	23864.6	22270.1	19099.8	25506	12601.5	11286.8	11523	11285.7
NEG_3402	5.24	297.081	3-Hydroxy-7-methoxy-2-(4-methoxyphenyl)-4H-chromen-4-one	[M-H]-	C17H14O5	Phenylpropanoids and polyketides	Flavonoids		0.713	4745.37	201.84	5351.37	4065.79	92.8171	4067.63	4612.76	3347.38	4142.83	3860.75	3785.01	4427.05	13614.3	13539.7	16800	12116.2	18353.6	16491.4	17170.6	15843.1	15698.4	14090.2	17567.4	4457.94	5006.27	4500.61	4947.55
NEG_2392	5.24	255.068	Isoliquiritigenin	[M-H]-	C15H12O4	Phenylpropanoids and polyketides	Linear 1,3-diarylpropanoids	C08650	0.885	10356.5	6852.18	10845.7	9871.86	7982.88	7480.25	18552.1	15405	16552.2	16059.8	16661.3	16147.6	19325.8	16985.2	23277.4	16885.3	23788.7	9767.42	9994.59	9624.08	9201.4	8254.22	10150.6	7354.1	8568.59	8354.19	8559.1
NEG_3192	5.245	287.058	Eriodictyol	[M-H]-	C15H12O6	Phenylpropanoids and polyketides	Flavonoids	C05631	0.889	159334	122859	167786	152088	117042	136420	26402.8	19048.9	21843.6	23337.9	23210.4	24453	64346.2	53400.7	81344.1	52919.2	81717.2	8934.69	9297.28	7920.06	9202.58	6706.01	8917.91	23641.6	24574.9	23845.7	27277
NEG_3494	5.252	300.054	Fenhexamid	[M-H]-	C14H17Cl2NO2	Benzenoids	Benzene and substituted derivatives		0.818	14016	14164.7	14620.5	15197.5	13402.1	14864.7	10344.1	10657.5	9163.4	9646.75	9269.39	9503.65	53796.3	48277.4	53684	50357.5	54238.3	4086.56	5090.28	4379.67	3741.41	3333.04	3844.58	10193.8	10242.7	10226.2	10706.3
NEG_7537	5.258	463.089	Spiraeoside	[M-H]-	C21H20O12	Phenylpropanoids and polyketides	Flavonoids		0.898	41817.6	38901.1	49879.8	42454.7	36148.8	33761.7	13640.3	11935.3	10688.7	12288.9	11511.4	12110.1	34492.7	30139.4	37460.8	26535.7	41888.9	8920.18	10121	8115.4	9873.05	9420.37	10008	10038.5	12751.2	10888.3	11225.4
NEG_6328	5.267	419.137	Isorhapontin	[M-H]-	C21H24O9	Phenylpropanoids and polyketides	Stilbenes	C10266	0.854	15232.1	11210.1	16020.8	13737.2	10929.5	13310.6	4825.92	3485.18	4047.24	4092.95	3897.75	4342.37	10981.5	10824.1	14705.7	10459.1	16556.2	9510.98	9641.16	9011.71	8325.94	7050.78	9791.62	4701.16	5110.19	5028.26	5107.64
NEG_7061	5.285	447.096	Kaempferol 7-O-glucoside	[M]-	C21H20O11	Phenylpropanoids and polyketides	Flavonoids		0.91	430314	357649	474035	423009	352498	390966	18228.3	17421.7	16306.9	18602.8	14795.7	14913.2	49368.2	51517.6	71759.5	52441.6	75952.1	7793.26	13962.6	10281.5	7538.43	7889.1	10930.3	59344.3	62194.4	62165.1	62160.4
NEG_6751	5.308	435.132	Trilobatin	[M-H]-	C21H24O10				0.885	325713	226942	356402	306331	223606	279334	4722.05	3929.49	3703.16	4360.65	4190.81	4547.85	177786	157071	224407	144819	259729	26785.6	28538.6	23234	23183.5	19996.5	28906.8	48402.5	51791.9	50843	51746.6
NEG_6235	5.331	415.199	Hexose + C13H19O	[M+HCOO]-	C19H30O7	Lipids and lipid-like molecules	Fatty Acyls		0.799	9866.75	9382.83	10741.4	10780.5	10190.2	9333.33	9002.16	8418.24	8522.89	9118.4	8712.38	8931.44	13168.4	12858.5	14524.8	12728.1	13556.2	9234.81	9888.13	8377.23	8701.63	7676.46	8923.09	4671.28	4631.53	4802.57	4646.97
NEG_6044	5.333	407.137	Tinnevellin glucoside	[M-H]-	C20H24O9				0.785	9697.18	7068.17	10411.6	9127.37	6886.96	8113.6	3206.9	1974.89	2627.04	2690.84	2744.16	2909.54	1689.18	1781.94	2745.8	1722.92	3079.44	4317.65	4105.68	3171.82	3200.97	2650.58	4111.37	1896.71	2211.27	2141.92	2200.47
POS_4396	5.352	355.17	2-(Hydroxymethyl)-6-(6-hydroxy-6-methyl-3-propan-2-ylcyclohex-3-en-1-yl)oxyoxane-3,4,5-triol	[M+Na]+	C16H28O7	Lipids and lipid-like molecules	Prenol lipids		0.715	4600.16	2532.12	5518.18	5445.93	9471.35	2270.85	9679.54	7506.94	8525.07	7038.23	9102.05	7330.34	28608.9	14871.1	31353.4	25518.7	31847.8	35851.1	36712.2	22295.7	20122.3	25036.9	36357.4	5809.51	5899.36	6201.6	5611.12
NEG_1734	5.357	219.179	Butylated hydroxytoluene	[M-H]-	C15H24O	Benzenoids	Benzene and substituted derivatives	C14693	0.869	75789.2	47504.6	77784.7	65927.9	95761.5	60936.3	56389.7	82867.1	70547.9	225996	60453.5	105719	68862.9	63822.8	157824	48574.5	121332	118164	96190.9	89143	59126.7	49082.9	77120	88064.2	45764	88451.1	83474.3
POS_1763	5.36	219.136	Pterosin B	[M+H]+	C14H18O2	Benzenoids	Indanes		0.752	11963.6	9903.06	12194.7	11105	9800.08	10286.1	12887.1	10952.2	10479.8	9386.94	12039.7	13606.4	13664.2	13005.3	14612.1	10720	15486.5	13943.7	13638.7	11892.6	11931.1	10805.3	15100.4	12639.5	10442.9	11760.4	10651.7
POS_2305	5.361	247.131	(9E)-11a-hydroxy-3,6,10-trimethyl-6,7,8,11-tetrahydro-4H-cyclodeca[b]furan-2,5-dione	[M-H2O+H]+	C15H20O4	Lipids and lipid-like molecules	Prenol lipids		0.742	112128	102917	129095	108932	98467.5	102030	120843	101797	108227	103837	107782	108535	116461	115311	143844	113714	142632	121537	126235	108724	100719	98143.8	134884	85316.6	87366.3	87538.6	86804.3
NEG_2557	5.361	263.128	Dormin	[M-H]-	C15H20O4	Lipids and lipid-like molecules	Prenol lipids		0.862	165838	137920	176177	159312	143164	150993	166663	140907	152394	162557	151883	155253	131333	128079	155679	124593	167481	167914	175074	155903	154441	141024	182833	64491.4	64954.8	64749.4	65128.6
NEG_4498	5.388	341.031	Boscalid	[M-H]-	C18H12Cl2N2O	Benzenoids	Benzene and substituted derivatives		0.709	53727.6	43099.6	54855.2	51204.4	43590.3	47045.1	360.642	363.052	256.358	315.229	195.353	198.772	3950.63	3304.82	1582.8	2758.11	4244.2	290.523	902.781	440.217	373.104	349.289	230.633	6186.4	6777.49	5453.4	6842.81
POS_1330	5.428	191.104	Ligustilide	[M+H]+	C12H14O2	Organoheterocyclic compounds	Isobenzofurans		0.701	22066.5	19367.2	21044.2	26976.8	20353.6	18457.6	22451.6	18758.6	19375.4	22277	18953.9	28068.7	17025.7	25883.2	24048.9	17154.8	22557.4	27232.2	26064.1	21647.4	28454.6	19859.8	28384.7	25925.5	21686	22516.8	21649.8
POS_5737	5.429	413.213	Gardneramine	[M+H]+	C23H28N2O5	Organoheterocyclic compounds	Indoles and derivatives		0.8	14158.3	10576.3	16690.3	10855.5	12175.3	11163.6	12992.3	15751.6	16488.1	10762.6	16662.2	17290.8	4265.27	5184.43	7110.64	3995.22	7266.38	5851.68	5614.38	8539.2	8332.9	7304.2	8309.79	7300.05	7707.09	6984.96	9427.91
NEG_1099	5.444	179.059	Propylparaben	[M-H]-	C10H12O3	Benzenoids	Benzene and substituted derivatives		0.746	10588.4	6544.52	10986	10295.7	4502.02	9811.43	8033.33	5651.26	8630.24	9129.33	8297.77	10242.4	7892.75	8265.92	31032.3	9977.84	21246.4	23577.9	28310.6	24045.2	6191.89	9507.53	17793.9	7700.22	7712.88	7455.22	7462.21
NEG_861	5.447	165.987	2-Mercaptobenzothiazole	[M-H]-	C7H5NS2	Organoheterocyclic compounds	Benzothiazoles		0.93	32026.9	27529	21646.4	45102.7	23490.4	21242.5	86601	33343.4	41218.3	34650.4	55191.1	67621.8	32322.4	31661.6	25071.1	27249.7	76784.4	39063.7	94650.3	55089.6	58829.4	24468.1	71734.5	41188.1	47743.1	41160.3	65170.2
NEG_621	5.469	153.021	3,4-Dihydroxybenzoic acid	[M-H]-	C7H6O4	Benzenoids	Benzene and substituted derivatives	C00230	0.794	301240	246867	311344	287503	256884	272298	2860.11	3028.64	2508.05	3022.62	3989.93	2720.75	46645.8	46110.7	54812.8	44444.9	58755.2	11173.6	11254.1	12345.2	11201.8	7884.58	10974.8	27128.8	31116.9	29336.2	30396.1
POS_6460	5.472	447.152	Purpurein	[M+Na]+	C21H28O9	Phenylpropanoids and polyketides	Cinnamic acids and derivatives		0.753	17953.1	15141.7	17574.3	16689.3	14613.4	13417.3	8968.06	7792.88	7422.3	7943.65	8390.23	8189.7	10679.8	10157.9	11306.7	11177.7	12683.3	3619.62	3209.56	2407.81	2398.33	2110.01	3531.52	6042.99	6572.19	5845.25	6302.72
NEG_5592	5.485	388.205	Alfuzosin	[M-H]-	C19H27N5O4	Organoheterocyclic compounds	Diazanaphthalenes		0.725	7917.06	7609.46	7223.03	7213.78	5259.07	6640.14	2874.92	2429.09	2298.49	2004.23	2148.04	2716.56	1780.52	1285.91	2007.41	1419.02	2285.15	235.992	48.0064	163.34	277.046	75.6323	138.592	910.441	1355.91	995.557	1074.78
NEG_2640	5.506	269.048	Baicalein	[M-H]-	C15H10O5	Phenylpropanoids and polyketides	Flavonoids	C10023	0.795	9390.06	9605.21	9568.01	10859.9	10285.3	9608.35	9738.6	8999.73	8853.24	8945.89	9002.81	8926.45	12000.3	10863.1	12413.9	11850.9	13630.6	2807.29	2673.19	2915.11	2630.25	2347.06	2425.49	4529.39	4864.56	4858.09	4858.35
NEG_2350	5.514	253.048	Rubiadin	[M-H]-	C15H10O4	Benzenoids	Anthracenes		0.848	8653.88	6122.09	6449.05	8901.58	4937.86	7504.8	4393.52	2133.36	5872.94	5225.84	5871.44	5527.04	10500.1	9341.44	4538.84	9400.16	4845.75	1934	2127.22	2279.89	2301.35	1580.21	2140.81	2158.19	1445.56	2035.94	2145.06
POS_5029	5.523	381.116	Junipediol B 8-O-glucoside	[M+Na]+	C16H22O9	Organic oxygen compounds	Organooxygen compounds		0.703	11451.9	8964.18	11216.5	11090.9	9730.14	11553.9	1583.82	1993.57	1962.23	2112.24	2242.88	2481.56	1529.1	1944.61	1885.55	2470.94	1723.73	1741.15	1736.35	1847.64	1689.62	1691.31	2362.11	3709.44	3269.7	4345.92	3559.77
POS_4488	5.528	359.132	Sweroside	[M+H]+	C16H22O9	Organic oxygen compounds	Organooxygen compounds		0.755	6705.05	5097.9	7611.21	5308.09	6115.45	5699.08	1160.62	836.382	746.524	1411.7	556.919	1330.16	1454.13	1608.71	2342.53	1455.3	2265.22	979.525	687.882	473.821	1348.02	1031.93	1002.17	2925.79	2456.37	2891.5	2836.79
POS_8697	5.543	543.216	Satratoxin F	[M+H]+	C29H34O10	Lipids and lipid-like molecules	Prenol lipids		0.756	3444.43	3205.45	4289.03	4511.92	3649.15	3206.47	3150.66	2143.04	2708.41	2295.96	3396.47	2568.1	29902.7	27057.3	29529.2	28526.9	32421.7	38220.9	37770.9	39218.4	35492.4	36638.3	38856	16328.5	15710	16709.9	16706.7
NEG_9835	5.544	549.253	3,5,5-Trimethyl-4-[3-[(6-O-beta-D-xylopyranosyl-beta-D-glucopyranosyl)oxy]butyl]-2-cyclohexen-1-one	[M+FA-H]-	C24H40O11	Lipids and lipid-like molecules	Fatty Acyls		0.793	5845.39	5791.45	5717.68	3601.73	4455.47	5807.33	3834.27	2968.49	2945.11	2069.59	2637.73	3234.57	40496.3	37952.7	51000.5	38871.2	55074.3	60159.8	97024.4	56046.3	87151.9	48050.1	68043.1	14759.1	16165.2	16149.3	16162.7
NEG_1060	5.565	177.057	4-Methoxycinnamic acid	[M-H]-	C10H10O3	Phenylpropanoids and polyketides	Cinnamic acids and derivatives		0.932	12124.7	10781.8	13045.6	11529.6	11234.5	11443.5	3357.67	2340.97	2693.65	2914.96	3301.02	3710.13	10002.1	10152.7	11594.7	9189.41	11894.3	3648.79	3480.84	3107.77	2996.03	2006.38	2961.13	2973.87	3130.95	2547.31	3543.66
NEG_3523	5.577	301.04	Morin	[M-H]-	C15H10O7	Phenylpropanoids and polyketides	Flavonoids	C10105	0.949	1.12884e+06	990944	1.11754e+06	1.11511e+06	1.02691e+06	1.12421e+06	581763	559064	554176	564302	545140	565918	1.12878e+06	1.09175e+06	1.28377e+06	1.06064e+06	1.22356e+06	408945	414096	384909	381575	342539	399465	423571	451086	443449	450753
POS_10392	5.583	629.335	(1beta,3beta,9xi,11alpha,14xi)-1,3,11-Trihydroxyfurosta-5,20(22),25-trien-27-yl beta-D-glucopyranoside	[M+Na]+	C33H50O10	Lipids and lipid-like molecules	Steroids and steroid derivatives		0.757	257800	204599	283531	241009	218523	223664	18448	15695.9	16795.5	15343.3	15401.5	17202.4	3567	4117.67	3932.12	3770.49	3484.23	14235.1	14140	11855.6	12445.9	11913.6	14651.8	50963.3	54355.9	53810.7	54356.2
POS_1586	5.62	209.125	Pilocarpine	[M+H]+	C11H16N2O2	Alkaloids and derivatives		C07474	0.718	82888.8	67929.8	76365.2	81720.2	67542.3	72213.9	84477.6	68786.4	80652.4	77548.9	77054.4	109011	74790.5	90726.3	77303.5	66754.7	75579.7	103086	81099	76281.8	104186	65591.5	106910	84902.9	78240.2	78179.4	79585.9
NEG_3036	5.648	283.061	Glycitein	[M-H]-	C16H12O5	Phenylpropanoids and polyketides	Isoflavonoids	C14536	0.902	8577.71	6725.73	10582.8	8024.28	6482.55	7830.69	21708.8	15779.9	19374.2	19706.3	19169	20171.6	22270.8	20527.5	27707.9	18179.8	27266.1	14156.9	12634	13086.5	12917.7	10640.6	14582.1	7904.06	8424.27	7724.71	8475.5
NEG_6646	5.737	431.226	Bufalin	[M+FA-H]-	C24H34O4				0.713	6587.14	3769.55	5125.79	5543.65	3439.11	5248.29	4652.44	3719.37	4924.85	2945.88	4943.31	4949.55	4744.41	4644.09	5881.17	4436.51	7134.06	4216.67	4274.21	3550.69	3881.91	2670.54	4640.85	1954.88	2004.16	1951.28	2441.58
NEG_1444	5.76	201.114	Sebacic acid	[M-H]-	C10H18O4	Lipids and lipid-like molecules	Fatty Acyls	C08277	0.867	18188.4	16229.9	18603.4	17825.6	15349.4	17543.9	22479.1	20084.6	20497.9	21495.6	21200.8	25621.3	18607.1	21665.1	20852.9	16770.8	20223.7	25866.9	21971.8	21739.3	25813.6	19943.2	27398.1	18712.7	16639.5	17949.7	17700.7
NEG_3131	5.77	285.043	Luteolin	[M-H]-	C15H10O6	Phenylpropanoids and polyketides	Flavonoids	C01514	0.918	755588	689299	785620	729237	687079	718188	393562	334837	351022	369182	358679	358123	311484	315082	363282	301922	352344	210887	221331	203123	202755	183484	220719	216474	227186	227153	227146
POS_5689	5.793	411.178	Isoapetalic acid	[M+Na]+	C22H28O6	Organoheterocyclic compounds	Benzopyrans		0.858	7616.99	6592.81	8669.36	7145.29	6806.31	7113.09	2628.22	3098.61	4081.15	3377.82	2434.07	3622.64	3248.93	3839.12	3658.48	3551.65	3610.92	4480.57	3664.7	3657.65	4056.27	3956.37	3843.21	4210.56	4281.62	4281.44	4281.41
POS_5329	5.795	395.2	Brucine	[M+H]+	C23H26N2O4	Alkaloids and derivatives	Strychnos alkaloids		0.8	24474.6	22265.3	21674.6	24743.7	21972.5	24370.9	5279.06	6906.59	7745.4	7599.61	10615.9	6817.27	13391.1	12366.9	12169	14563.1	9735.44	7484.93	6603.05	10147.4	10286.7	8509.01	8526.46	10006.7	8315.78	10458.5	10450.1
NEG_2676	5.841	271.062	Naringenin	[M-H]-	C15H12O5	Phenylpropanoids and polyketides	Flavonoids	C00509	0.748	20083.7	19863.8	183636	191451	196852	191413	13842.5	12749.3	125236	14011.7	13351.8	12770.3	133769	130639	138196	155821	110156	12440.7	8077.46	8606.97	11376.9	150369	9253.37	19182.8	93419	14614.5	74913.2
NEG_2714	5.853	273.078	Phloretin	[M-H]-	C15H14O5	Phenylpropanoids and polyketides	Linear 1,3-diarylpropanoids	C00774	0.939	306626	244868	308308	293805	242299	279167	14813	11929	13137.8	12990.6	12673.3	13817.5	161240	145821	198808	143368	186163	28711.8	29876.8	27449.7	27510.9	23298.5	30265.4	62404.6	69217.2	67770	69486.5
POS_6669	5.879	455.185	Amethopterin	[M+H]+	C20H22N8O5	Organoheterocyclic compounds	Pteridines and derivatives	C00855	0.731	7284.08	4087.87	8513.19	6386.48	4959	5848.64	9798.99	3370.06	5779.05	10504.1	7723.08	10516	5215.9	5161.67	7414.86	2890.97	9937.13	51823.6	54921.4	51146.2	51054	47852.7	52796.3	1731.72	1266	1527.7	1461.04
NEG_3848	5.884	315.051	3-O-Methylquercetin	[M-H]-	C16H12O7	Phenylpropanoids and polyketides	Flavonoids	C04443	0.848	51619.1	44640.9	50623.9	45567.7	48213	46332.5	7231.51	8082.37	6099.05	8347.37	6957.9	6768.19	27329.5	28024.6	30517	25591	30117	28674.5	29901	27799.7	27883.4	27485.9	29698.1	13514.5	14032	13807	14134.4
POS_3948	5.965	338.182	Olopatadine	[M+H]+	C21H23NO3	Organoheterocyclic compounds	Benzoxepines	C07789	0.782	22100.5	18432.6	20434.7	21590.3	21587.5	21655.2	18763.4	20897	24090.8	19577.3	20804.9	31258	19266.9	23149.6	19334.3	18856.7	19690.1	27949.9	20288.7	21673.6	29143.1	19043.3	26601.2	25727.8	22264.4	22263.7	22694.5
POS_1218	5.989	181.122	Jasmolone	[M+H]+	C11H16O2				0.731	46712.6	34189.4	33239.1	39498.6	31460.5	40026.5	28027.5	43409.3	47677.9	39280.7	34363.2	47783.4	37334	46401.1	34910	39999.9	37622	40882.4	28552.5	32166.3	36209.5	26999.2	29911.4	37497.5	36442.5	35823.8	39318.5
NEG_1924	6.036	229.142	Dodecanedioic acid	[M-H]-	C12H22O4	Lipids and lipid-like molecules	Fatty Acyls	C02678	0.791	29054.9	24857.8	32316.8	28985.5	25198.7	26747.8	62886.9	53750.3	56269.6	60086.8	57911.5	59590.2	60928	61529	66984.3	56331.3	73756.4	28957.7	29638.7	25946.7	26504.9	24808.9	31227.8	20235.2	20236.1	20901	20256.7
NEG_1339	6.04	195.068	2,4-Dihydroxy-6-propylbenzoic acid	[M-H]-	C10H12O4	Benzenoids	Benzene and substituted derivatives		0.837	103524	93184.5	102557	101985	91031.6	102396	2496.29	1924.91	2202.35	1812.77	2639.12	2386.39	2111.81	2214.01	2012.25	2229.62	2373.02	1144.75	1632.13	1408.16	871.266	1857.57	1273.48	14296.2	15108.1	14825.7	15079.6
POS_8494	6.124	535.23	Methyl 2-[(1R,5R,6R,13S,14S,16S)-14-acetyloxy-6-(furan-3-yl)-1,5,15,15-tetramethyl-8,17-dioxo-7-oxatetracyclo[11.3.1.02,11.05,10]heptadec-10-en-16-yl]acetate	[M+Na]+	C29H36O8	Lipids and lipid-like molecules	Prenol lipids		0.729	12080.7	9681.39	13573.3	9790.35	8930.85	10042	1181.76	986.775	1348.54	871.561	1701.42	1148.15	1206.97	1248.91	2022	1317.55	2239.67	934.558	770.008	946.254	1099.89	403.419	452.577	3232.21	3151.29	3751.96	3037.73
NEG_4880	6.143	357.142	Matairesinol	[M-H]-	C20H22O6				0.709	3736.76	2895.95	4194.19	3060.68	2902.64	3683.92	18886	11895.7	16298.3	17917.4	16205.6	17024	319.502	874.558	1967.32	804.075	1201.34	13615.4	17734.3	13663	10979.1	8907.07	17674	2688.86	3121.57	2069.06	2807.95
NEG_2638	6.175	269.048	Apigenin	[M-H]-	C15H10O5	Phenylpropanoids and polyketides	Flavonoids	C01477	0.926	150490	124684	146660	149564	120206	143021	118741	102557	112291	110973	111690	112661	91746.1	81375.8	109984	78114.1	103473	71121.6	68861.6	69296.2	68412.1	58915.2	73001.2	51270	59091.6	57485.5	58992.1
POS_6732	6.179	459.18	5-Hydroxy-7-[4-hydroxy-2-methoxy-3-(3-methylbut-2-enyl)phenyl]-2,2-dimethyl-7,8-dihydropyrano[3,2-g]chromen-6-one	[M+Na]+	C26H28O6	Phenylpropanoids and polyketides	Isoflavonoids		0.737	15930.2	12489.2	16717.7	13112.6	13680.2	13287.5	4455.23	4508.77	3698.27	4063.24	3861.44	5362.83	2141.48	2405.91	2296.52	1459.78	2544.5	5392	6248.53	4979.15	5808.17	5065.22	6976.11	6043.39	5745.67	6430.61	5889.61
POS_5857	6.181	419.192	(E)-3-(4-Methoxyphenyl)-1-[2,4,6-trimethoxy-3-(3-methylbut-2-enyl)phenyl]prop-2-en-1-one	[M+Na]+	C24H28O5	Phenylpropanoids and polyketides	Linear 1,3-diarylpropanoids		0.717	8163.08	6474.82	9179.09	8469.33	6918.21	7572.27	3033.03	3022.7	2966.78	2867.71	2382.31	3058.14	1238.97	906.116	1070.65	699.684	715.83	3848.48	3881.77	2748.68	3703.87	4259.39	4709.8	3620.26	3523.8	3229.57	3844.9
POS_2330	6.203	249.195	Matrine	[M+H]+	C15H24N2O	Alkaloids and derivatives	Lupin alkaloids		0.869	74289.2	57506.4	75017.2	67208.9	62445.7	63639.9	69039.5	61712.2	69898.6	69579.9	72893.9	101118	67037.6	87369.6	68191.3	60630.5	67293.5	100458	74989.7	71495.3	90796.8	60174.8	95096.1	78440.5	69320.2	69264	71079.2
NEG_3461	6.232	299.055	Hydroxygenkwanin	[M-H]-	C16H12O6				0.818	86364.7	69108.6	83933.7	83440.5	68576.2	78100.6	16572.7	15308.2	16047.5	16061.3	13738.8	16632.9	32812.5	29243.1	37216.5	21575.9	36805.9	18386.7	20830.2	17641.8	17189.7	16595.3	18258.6	17101.8	19717.6	19195	19686.9
NEG_2393	6.24	255.068	Liquiritigenin	[M-H]-	C15H12O4	Phenylpropanoids and polyketides	Flavonoids	C09762	0.944	90454.6	81803.7	86624.6	92408.9	77386.9	89643.9	81531	77915.2	81684	79969	85561.7	83694.1	122046	107295	133296	106297	117474	49578.5	49799.8	48916.3	49465.5	47711.5	48718.1	43167.2	47570.2	46131.9	47441.9
POS_7011	6.248	471.208	(R)-Linalyl beta-vicianoside	[M+Na]+	C21H36O10	Lipids and lipid-like molecules	Fatty Acyls		0.769	1310.71	840.409	800.78	6953.09	6632.85	1110.74	7314.28	1547.08	868.612	7245.75	7434.38	7244.99	8882	3815.08	2334.78	6092.1	9184.4	206752	10277.4	10950.2	16129.3	16830.1	234665	3888.21	3546.28	5147.71	3629.57
POS_4182	6.255	347.227	Corticosterone	[M+H]+	C21H30O4	Lipids and lipid-like molecules	Steroids and steroid derivatives	C02140	0.75	6464.35	7308.79	9133.72	7300.25	7545.43	7432.99	12699.1	12109.9	11238.4	11774.7	11356.7	12128.1	7086.64	11328.2	7891.92	7085.07	7697.96	8062.61	7729.59	8297.09	8452.26	5227.01	7134.19	64302.8	64302.2	64625.6	65144.8
POS_1660	6.35	214.18	N-(9-Oxodecyl)acetamide	[M+H]+	C12H23NO2	Organic acids and derivatives	Carboxylic acids and derivatives		0.804	49694.7	38642.7	49501	49655.3	41425.5	45681.6	46783.4	46109	51639.3	46313.1	51020.3	71609.6	51522.8	59942.2	50749.8	41610.9	51173.9	63162.5	46326.4	45479.7	61829.3	42760.9	59465.3	53006.1	48238.9	48224.4	49201.2
POS_5418	6.358	399.178	8-Hydroxy-2,7,7,11,15-pentamethyl-5,12,16-trioxapentacyclo[9.8.0.0(2),.0,.0(1)(3),(1)]nonadec-13(18)-ene-3,17-dione	[M+Na]+	C21H28O6	Organoheterocyclic compounds	Naphthopyrans		0.765	10312.6	8878.23	9666.19	9555.95	8556.16	10269.4	8656.54	10244.6	9816.95	9183.51	13698.1	12065.6	9983.17	10224.7	9972.82	7791.86	9262.28	11039.2	9842.54	13398.5	11811.8	9891.06	11078.8	10430.7	9717.46	9966.16	10198.3
NEG_8385	6.393	493.233	(6,6-Dimethylbicyclo[3.1.1]hept-2-yl)methyl 6-O-[(2R,3R,4R)-3,4-dihydroxy-4-(hydroxymethyl)tetrahydro-2-furanyl]-beta-D-glucopyranoside	[M+FA-H]-	C21H36O10	Lipids and lipid-like molecules	Prenol lipids		0.898	955.669	716.498	806.232	798.431	719.485	486.176	519.279	133.943	136.522	436.795	288.752	239.191	4107.39	4140.42	5208.44	4164.14	4264.65	208683	228245	202911	203584	183336	232250	23478.1	23881	24330.7	24327.9
NEG_7090	6.393	447.222	Pentose-Hexose + C10H17	[M-H]-	C21H36O10	Lipids and lipid-like molecules	Prenol lipids		0.79	528.903	638.82	561.611	751.768	226.902	568.608	121.284	307.878	455.174	123.795	379.914	761.231	3334.14	2836.69	3278.18	2662.53	3556.69	159662	166201	146940	150751	128302	174047	16463.2	17726.2	17406.7	17692
POS_406	6.399	128.143	Coniine	[M+H]+	C8H17N	Alkaloids and derivatives			0.765	6271.32	5324.5	6111.85	6392.29	5367.66	6605.74	6370.18	5765.95	6915.84	6599.52	6677.23	9700.67	5697.22	8076.65	6386.09	5334.28	6649.52	8880.66	7026.31	6974.05	8653.79	5005.8	9069.13	7526.82	6465.57	6454.86	6456.59
POS_838	6.4	156.137	2,2,6,6-Tetramethyl-4-piperidone	[M+H]+	C9H17NO	Organoheterocyclic compounds	Piperidines		0.717	68230	66410.8	69598.7	68971.7	63655.5	67928.9	69294.7	61139.2	70945.4	64722.9	68929.8	93510.3	70207.8	83920.5	63540.7	61210.6	68032.9	87023.4	71299.2	65518.6	92252.9	61606.9	85881.4	76336.6	67431.2	71637.2	70661.8
NEG_8336	6.432	491.287	2'-Deoxyinosine triphosphate	[M-H]-	C10H15N4O13P3	Nucleosides, nucleotides, and analogues	Purine nucleotides		0.717	49040.8	41933.2	51153.5	46257.4	43573.4	43629.2	176602	155695	165373	173668	161724	162678	36553.5	35882	41441.5	32727.9	44144.6	82579.5	39608.8	72005.9	76668.4	69166.4	88233.3	37469.3	37302	38077.2	37068.1
NEG_2940	6.514	281.048	Pseudobaptigenin	[M-C6H10O4-H]-	C16H10O5	Phenylpropanoids and polyketides	Isoflavonoids	C10522	0.859	10324.1	8764.61	10087.2	9981.09	8319.73	9988.18	22478.8	19331.6	22030.7	20351.2	21007.9	20851.9	22985.1	21631.9	24210.8	20459.5	24054.1	9319.01	9949.25	9721.56	9319.94	9292.61	9785.45	7873.91	8111.41	7893.98	8402.69
POS_1819	6.57	223.094	Diethyl phthalate	[M+H]+	C12H14O4	Benzenoids	Benzene and substituted derivatives	C14175	0.901	15854.9	16480.6	20398.2	11761.3	12779.7	14727.2	16236.2	9517.32	15065.4	18071.7	13481.8	19469.5	16067.1	17646.2	18032.2	20023.6	18319.8	19622.8	16940.4	19870.9	20531.2	15921	21469.9	22326.6	21673	22506	20834.3
POS_694	6.572	149.023	Phthalic anhydride	[M+H]+	C8H4O3				0.768	551859	565562	528617	590544	537092	478281	635618	548073	650819	649328	593978	672445	657123	599984	646716	604052	627315	733149	621307	595701	775324	534534	647065	724050	698321	852035	697601
NEG_2615	6.601	267.07	Formononetin	[M-H]-	C16H12O4	Phenylpropanoids and polyketides	Isoflavonoids	C00858	0.939	38266.7	31750.5	37506	36858.9	32935.7	36433.6	94694.7	81881.4	88085.1	87417.1	86580.8	87347.9	87016.9	81461.8	100755	77555	98624.2	37223.7	37991.9	36048	36649.6	33149.5	39649.7	30084.6	30103.4	30677.9	30670.4
POS_4286	6.691	352.243	Jacobine	[M+H]+	C18H25NO6	Alkaloids and derivatives			0.805	110777	96185.8	108707	112883	95564.8	105083	108810	102659	115664	113801	114169	162107	109098	134571	108720	96156.6	113044	146915	106347	110138	156120	89358.1	153301	125956	102412	113159	109775
POS_1236	6.694	183.114	Tetradeca-4,6,8-trien-10,12-diyn-3-ol	[M+H-H2O]+	C14H16O				0.777	10151.3	12132.1	10996.6	10930	13204	9189.32	11766.6	10366.1	13128.8	11201.3	10900.7	13533.8	9897.11	12854.7	10926.6	10532.8	10760.5	13849.9	12233.4	10724.6	14315.5	11201	14726	13347.2	11696.1	12847	12607
POS_179	6.758	100.073	1-Methyl-2-pyrrolidinone	[M+H]+	C5H9NO	Organoheterocyclic compounds	Pyrrolidines		0.839	15474	12478.9	13423.3	17472.4	12852.2	15512.9	12777.5	15302.1	11773.9	12782.5	14864.2	17945.2	18090.8	17613	13601.6	12331.4	16338	18184	12277	17184.9	17649.9	13533.3	18490.4	17425.3	13459.4	14268.5	13442.5
POS_4076	6.769	342.155	Sulpiride	[M+H]+	C15H23N3O4S	Benzenoids	Benzene and substituted derivatives		0.708	7668.25	7018.38	8159.09	7167.6	6751.31	8019.43	7891.76	6778.56	6639.61	5335.03	7292.13	5944.99	2521.25	1903.38	2377.87	1217.69	2302.74	16994.6	16821.5	13079.5	11712.3	12945.5	15857.6	5897.74	6629.7	6559.49	6447.31
POS_4026	6.77	340.156	Papaverine	[M+H]+	C20H21NO4.HCl	Organoheterocyclic compounds	Isoquinolines and derivatives		0.721	19188.1	15239	22433.5	16470.7	15236.6	16253.6	16135	12287.3	12216.2	13755.3	13639.4	13916.6	4151.16	3503.47	4008.62	2493.15	4126.93	34731	38310.5	29474.7	28984.8	25698.2	40284.1	14425.9	14427.2	14291.9	14246.7
NEG_4158	6.771	327.218	9,12,13-Trihydroxyoctadeca-10,15-dienoic acid	[M-H]-	C18H32O5	Lipids and lipid-like molecules	Fatty Acyls		0.767	26214.1	20609.4	18922.5	17293.9	14789.6	23029.3	66547.2	50979.2	59612.7	58463.7	40543.8	57840.5	49624.5	48629.2	62871	46820.9	68022.3	96962.4	105969	93522.5	91636.9	73681.7	113890	24114.7	19494.4	20327.5	19449.3
NEG_3531	6.797	301.113	1-(2,4-Dihydroxyphenyl)-2-(3,5-dimethoxyphenyl)propan-1-one	[M-H]-	C17H18O5	Phenylpropanoids and polyketides	Alpha-methyldeoxybenzoin flavonoids		0.796	8298.66	7532.38	9756.97	8223.5	6379.85	7967.01	24755.5	19203.4	23246.6	23061.9	21869.3	23499.5	18954	18455.8	25739.5	17114.6	23838.5	10137.4	10668.4	8232.47	8208.89	7882.03	10765.8	7304.55	8108.91	7895.27	8656.75
NEG_1318	6.863	193.088	Butylparaben	[M-H]-	C11H14O3	Benzenoids	Benzene and substituted derivatives		0.783	39329.2	31090.6	37715.2	37740.8	31839.9	36723.8	40444.1	34947.7	40059.7	40291.4	38959.1	53948.9	35797.2	45225.6	41840.9	31192	40180.8	51076.9	39666.2	38718.7	51542.1	32197.5	52930.4	49917.7	44543.5	44953.4	45212
NEG_4085	6.886	325.202	FA 18:3;3O	[M-H]-	C18H30O5	Lipids and lipid-like molecules	Fatty Acyls		0.789	7909.82	5377.28	7977.75	6407.47	5970.02	8034.01	14742.4	9000.05	9950.46	13571.4	10385.6	13407.5	12501.6	10852.7	12741.7	10714.7	14691.9	56454.8	56899.1	51527.3	50136.8	45786.3	61248	10209.5	10272	9766.9	10271.7
POS_231	6.929	105.031	3-Cyanopyridine	[M+H]+	C6H4N2	Organoheterocyclic compounds	Pyridines and derivatives		0.754	13616.7	11222.4	13903.9	13405.2	10878	11631.3	14369.7	10542.4	12930.4	13972.2	11855.1	16601.9	13298.3	14601.1	16895.6	11459.8	14177	16318.8	14049.6	14056.7	15632.8	11435.7	16603.3	13162.7	11855.8	11838.9	12214
POS_1008	6.945	167.084	Fluorene	[M+H]+	C13H10	Benzenoids	Fluorenes		0.719	18445.5	16520.6	23530.9	14828.1	14377	16197.6	19755.3	17527.5	16554.4	19632.9	17858.8	25557	16796.9	20033.7	16931.8	15072.2	17626.3	23497.3	17913.1	16828.1	20784.7	15303.9	26566.6	19734.3	20434.3	19311.1	19419.3
POS_2789	6.968	279.092	Triphenylphosphine oxide	[M+H]+	C18H15OP	Benzenoids	Benzene and substituted derivatives		0.721	38251.3	33643.7	39558.5	35615.1	34343	33679.9	39586.3	33832.6	43344.5	37129	37144.9	46059.5	33573.3	39095.3	32747.4	32583.6	37010.9	42530.3	37536.1	37330.6	42475.2	31155.4	45794.3	43797.1	41779.7	41762.6	42425.2
POS_2338	6.99	250.178	N-Desmethyltramadol	[M+H]+	C15H23NO2	Benzenoids	Phenol ethers		0.825	564480	506672	559836	533825	482296	521834	541874	448507	496964	520959	550615	718550	505441	649708	520614	477855	533912	663811	524507	526873	663697	468042	692411	604344	560146	559761	568643
NEG_3463	7.032	299.056	Hispidulin	[M-H]-	C16H12O6	Phenylpropanoids and polyketides	Flavonoids	C10058	0.831	10834.4	9781.61	11150.1	9852.95	10213.2	11480.2	9429.85	10575	6841.81	9733.65	9279.33	12724.4	13463.3	16130	13886.4	12764.4	13449.2	12021.1	9280.19	8976.17	12740.1	8697.72	12249.9	11377.3	9190.53	10127.7	9817.65
NEG_2394	7.033	255.071	Pinocembrin	[M-H]-	C15H12O4	Phenylpropanoids and polyketides	Flavonoids	C09827	0.899	23775.2	20905.2	22304.2	25988.3	21434.4	24447.7	28019.4	25386.5	25538.8	25668.3	27067.1	26938.5	84404.6	80470.1	102500	77560.6	81940.6	111569	113364	115662	117812	105849	108319	31669.9	32314.4	32329.2	32422
POS_4915	7.067	376.258	7''-ethyl-6-methyl-4'',7''-dihydro-3''H-dispiro[oxane-2,6'-[7,9,12]triazatricyclo[6.3.1.04,12]dodecane-10',2''-oxepin]-8'-en-3-ol	[M+H]+	C21H33N3O3				0.937	785215	681037	854741	745302	687338	730116	706686	614350	634072	618380	641722	754191	950602	967871	1.11868e+06	905592	1.18216e+06	845897	806852	762113	783914	681873	919649	1.78489e+06	1.74577e+06	1.85015e+06	1.77202e+06
NEG_4237	7.134	329.233	(Z)-5,8,11-Trihydroxyoctadec-9-enoic acid	[M-H]-	C18H34O5	Lipids and lipid-like molecules	Fatty Acyls		0.901	28355.7	21860.9	29937.8	27672.6	26127.1	24922.3	140013	99825.7	107866	116130	109355	116351	78373.4	71168.5	97075.9	67786	99608.5	214453	212880	196985	180923	156030	209859	35084	32254.5	34643.4	35084.8
POS_3472	7.139	316.188	(E)-Piperolein A	[M+H]+	C19H25NO3	Organoheterocyclic compounds	Benzodioxoles		0.769	298572	253948	255309	280734	252611	278990	254992	277537	137599	260470	290672	420421	249813	328751	270037	245222	247637	354321	252671	289211	388542	243760	346107	342556	298028	301707	302168
NEG_4354	7.152	335.092	Altertoxin I	[M+H-H2O]-	C20H16O6	Benzenoids	Perylenequinones		0.729	9596.48	5940.44	7474.56	8944.04	5579.61	7339.51	5795.21	4559.87	6633.55	7572.31	6282.65	6683.4	2694.95	2521.09	4122.18	2610.06	2874.85	3344.99	2275.92	2544.32	2303.97	2035.81	2637.23	2748.01	3374.96	2720.5	2845.22
POS_1477	7.16	202.213	1-Decanamine, N,N-dimethyl-, N-oxide	[M+H]+	C12H27NO	Organic nitrogen compounds	Organonitrogen compounds		0.823	50744.2	41844.5	52131.6	43789.6	38972	46342.8	52463.4	48932.8	53145.9	51026.7	58391.1	67085.4	61423.6	67265.6	59662.8	55653	58714.8	55548.4	49472.3	49189	63881.2	44585.6	64079.3	57685	51949.9	54022.4	53217.4
NEG_924	7.164	168.14	Pyridoxine	[M-H]-	C8H11NO3	Organoheterocyclic compounds	Pyridines and derivatives	C00314	0.748	61712.5	43524	57599.7	59626.5	44195.7	54245.5	65442.9	54198.7	66354.6	65528.7	67156.3	90756.7	55817.7	67711.3	66378.5	45756.8	65080	93074.4	63219.9	65266.3	85834.3	49788.4	88942.2	61683.1	58306.9	58305.5	59028.5
POS_400	7.165	127.038	Phloroglucinol	[M+H]+	C6H6O3	Benzenoids	Phenols	C02183	0.802	19623.7	23412.8	19284.2	19741.5	20904.2	19030.2	29216.6	32278.3	31028.8	29830.7	33719.2	31953.8	40841.4	38919.1	39847.6	42999.1	36728.2	25549.3	26655.7	27085.5	28478.5	33562.9	25103.7	1204.7	1463.38	1371.84	1660.08
POS_363	7.166	121.062	Phenylacetaldehyde	[M+H]+	C8H8O	Benzenoids	Benzene and substituted derivatives	C00601	0.808	90563.9	83841.5	86969.3	88217.6	85017.6	96576.4	152722	169470	146711	124679	178269	160901	207529	192665	184167	189385	190469	105341	122213	124817	141099	125215	121640	1724.81	1609.52	2283.81	1619.72
POS_5986	7.168	425.134	Icariside F2	[M+Na]+	C18H26O10	Organic oxygen compounds	Organooxygen compounds		0.782	257826	343987	282349	281291	325941	308946	449404	635974	476618	358028	485330	465524	671028	663017	536204	738972	572201	300283	330783	359336	407169	472458	362268	389.389	394.817	512.362	396.81
NEG_4009	7.211	323.132	Isobavachin	[M-H]-	C20H20O4	Phenylpropanoids and polyketides	Flavonoids		0.844	13520.6	11386.6	13334.5	12890.6	11245.2	13427.3	9154.76	7424.58	8187.86	9006.46	8281.31	8270.82	10776.9	10189.4	12775	7746.69	10726.8	11606.6	10915.6	9991.17	10013.9	8791.61	11339.3	6355.07	6682.13	6275.95	7028.9
POS_601	7.234	139.074	2,5-Dimethylresorcinol	[M+H]+	C8H10O2	Benzenoids	Benzene and substituted derivatives		0.753	28570.9	22686.8	27784	25952.3	26681.1	28197	29973.6	28050.1	33154.9	28020.9	34070.4	39599.5	26304.2	32813.8	29317.1	23134.5	27995.7	35766.3	26354.1	27687.4	37525.2	23748.7	37016.4	32303.4	29935.5	29878.3	29901.4
POS_1011	7.235	167.142	Dihydrojasmone	[M+H]+	C11H18O				0.714	42827.8	39474.4	43979.9	42584.4	36907.7	40458.2	47080.5	43212.2	52561.3	40955.5	48764	59320.8	40181.8	54387.8	39615.1	37257.7	40918.8	53618.4	38645.4	41095.7	64054.1	36319.8	54471.9	51149.9	43557.9	44912.7	43542.5
POS_2063	7.235	235.132	Pterosin G	[M+H]+	C14H18O3	Benzenoids	Indanes		0.746	55387.5	46819.5	53985.4	55706.5	49995.2	51477.4	52975	60029	71133.3	55056.2	66917.9	83325.9	56452.8	74633.8	59007.1	47126.7	50966.4	75098.9	52720.3	61734.4	79824.6	52892.9	74997.2	68204	58350.6	61475.7	59935.8
POS_2510	7.283	261.196	Ropinirole	[M+H]+	C16H24N2O	Organoheterocyclic compounds	Indoles and derivatives	C07564	0.71	8841.79	9201.62	9177.4	10134.7	9347.24	10269.9	8901.1	9714.87	9987.27	8626.39	10033	10529.7	10931.7	12259.4	10637.6	7888.54	7808.01	11132.5	7663.03	9257.14	12984.8	8076.69	13307.4	12913.1	10562.7	12043.4	10848.4
POS_3646	7.311	327.009	Tris(1-chloro-2-propyl)phosphate	[M+H]+	C9H18Cl3O4P	Organic acids and derivatives	Organic phosphoric acids and derivatives		0.86	66531.9	68703.9	64022.5	67541.5	69138.6	66716.3	71630.4	81627.8	77261	69925.9	86459.8	80638.4	69576.7	94702.1	68329.3	67542.6	76025.5	76928.7	61996	71448.6	96265.2	69520.3	83168.8	79730.8	71332.6	83174.6	77674.3
POS_4250	7.32	351.21	Vinpocetine	[M+H]+	C22H26N2O2	Alkaloids and derivatives	Eburnan-type alkaloids		0.716	15316	14043.8	17615	16106.2	12129.2	15425.9	23471	23164.5	26040.3	23086.2	27574.7	24799.9	10618.8	16079.2	14853.4	10268.1	18074	88137	86629.7	73876.4	77492.1	70242.6	91222.5	29064	29064.1	29193.8	29112.6
POS_1883	7.381	227.124	12-Hydroxyjasmonic acid	[M+H]+	C12H18O4	Lipids and lipid-like molecules	Fatty Acyls		0.709	42220.1	34834.7	37112.9	42233.9	33800.7	39189.8	36431.7	32876.8	35168.1	41472.7	41738.6	54273.1	36177.4	47667.2	38083.9	35089.2	34898.4	53267.4	37490.3	41195.1	52212.7	33231.7	52387.7	42732.4	36302.8	36278.3	37617.9
NEG_2493	7.391	259.023	Demethylbellidifolin	[M-H]-	C13H8O6	Organoheterocyclic compounds	Benzopyrans		0.803	44180.3	28864.7	37404.6	34941.5	78212.3	45205.6	8322.26	4716.66	6192.94	2982.78	5181.22	2219.95	5598	21146.8	6849.32	12220.5	12632.7	20397.3	26276.1	25212	20739.3	20686.6	19063.2	7224.56	13726.5	8679.68	9372.4
NEG_2683	7.397	271.101	(2r)-1-(2,4-Dihydroxyphenyl)-2-(4-methoxyphenyl)propan-1-one	[M-H]-	C16H16O4	Phenylpropanoids and polyketides	Alpha-methyldeoxybenzoin flavonoids		0.923	199159	170959	186251	193522	167131	190599	585329	513933	567740	564201	552522	568014	437022	417196	558795	403135	393819	210412	211173	205809	203977	187452	205558	163671	177694	174575	177585
NEG_1815	7.419	223.098	Olivetolic acid	[M-H]-	C12H16O4	Benzenoids	Benzene and substituted derivatives		0.839	146828	139396	133450	152623	136837	154428	16476.8	15183.6	16206.6	16682.8	16863.5	17813.1	16333.2	16241.3	22510.6	15520.3	13738.3	10859.8	10837.4	10668.8	10595.4	10598	10408.5	25668.4	28053.1	27772.3	28022.7
POS_5787	7.424	415.21	Gelomulide N	[M-H2O+H]+	C24H32O7	Organoheterocyclic compounds	Naphthofurans		0.717	9589.48	8613.24	10819.2	9220.95	8338.36	8589.28	9792.4	8743.51	8941.25	7501.2	9590.98	8912.64	10154.3	9254.3	10144	9202.39	11378.1	8254.5	7854.65	7635.78	7886.72	7055.09	9380.81	7232.81	7079.73	8278.64	7081.37
NEG_4824	7.432	355.123	(2S,3S)-3,5,7-Trihydroxy-2-(4-hydroxyphenyl)-8-(3-methylbut-2-enyl)-2,3-dihydrochromen-4-one	[M-H]-	C20H20O6	Phenylpropanoids and polyketides	Flavonoids		0.845	6714.32	5651.81	6695.61	7485.75	6409.86	6899.13	27557.2	23283.9	27643.4	26532.7	26538.3	26348.1	13260.4	12073.9	18180.8	11132.7	11757.4	8964.73	8606.53	8221.15	7660.3	7286.37	6918.67	6411.66	7503.09	7303.09	7495.17
NEG_2109	7.454	239.069	Dinoterb	[M-H]-	C10H12N2O5	Benzenoids	Phenols		0.779	21871.6	19667.1	22408.5	21963.9	18538	20423.6	24446.9	20216.7	25012.3	24149.6	25965.3	30254.5	21043.9	27233	22807.4	20254.4	23629.4	30259.1	26569.3	22582	29202.4	19083.7	31731.8	27187	23615.3	24367.3	23594
POS_3081	7.476	295.186	[6]-Gingerol	[M+H]+	C17H26O4	Benzenoids	Phenols	C10462	0.749	16388	14405.3	17254.7	18853.1	17841.5	17533.9	18533.7	21510.2	16097.6	18712.4	17378.1	23550.8	15833	17461.3	16900.6	14568	16365.1	20142.5	21543.6	21507.4	17030.9	13845.9	23658.5	22226.4	20079.7	21221	19703.9
POS_976	7.477	165.054	2-Hydroxycinnamic acid	[M+H]+	C9H8O3	Phenylpropanoids and polyketides	Cinnamic acids and derivatives	C01772	0.832	106836	93497.3	103098	108366	96558	102024	104533	99576.9	113461	108372	104740	148365	104020	137181	103388	96034	104708	148896	107837	110468	152991	93826.8	145550	138773	116755	120705	116756
POS_3502	7.478	317.171	6-[(2E,4E)-4,6-Dimethyl-2,4-octadienoyl]-2,3-dihydroxy-2-methylcyclohexanone	[M+Na]+	C17H26O4	Organic oxygen compounds	Organooxygen compounds		0.759	99634.3	82855.2	95764.3	102093	84872.7	89114.4	96121.6	88486.2	102583	101613	99529.4	146499	92380.3	120180	99807.1	78316.1	94918.4	148748	103731	99913.5	139456	79258.2	131305	131285	107526	117350	113892
NEG_3324	7.479	293.177	Gingerol	[M-H]-	C17H26O4	Benzenoids	Phenols		0.915	2.28887e+06	1.73991e+06	2.25295e+06	2.09436e+06	1.82909e+06	2.10136e+06	2.36816e+06	1.97784e+06	2.38668e+06	2.44576e+06	2.37508e+06	3.56768e+06	2.1127e+06	2.88351e+06	2.5313e+06	1.79236e+06	2.46409e+06	3.94148e+06	2.50801e+06	2.49918e+06	3.71596e+06	1.94071e+06	3.83526e+06	2.96471e+06	2.4518e+06	2.55513e+06	2.45073e+06
NEG_11142	7.479	609.339	Kaempferol 3,7-diglucoside	[M-H]-	C27H30O16	Phenylpropanoids and polyketides	Flavonoids		0.796	74680.8	39109.9	73472	66241.3	42388.1	62059.6	77032.8	54486.3	83651.5	81009.1	83229.5	190520	60465.9	111263	83003.1	39895	84142.7	216081	94167.2	93030.3	186402	46852.9	196978	117253	85925.9	94282.4	89744.6
NEG_4232	7.51	329.231	9,12,13-Trihydroxyoctadec-10-enoic acid	[M-H]-	C18H34O5	Lipids and lipid-like molecules	Fatty Acyls		0.774	32662.4	27579.2	34639	28556.1	29637.1	29499	59521.5	51367.6	58071.7	61201.2	58362.4	66469.3	48032.5	51252.2	58596.6	43580.6	59096	108640	100240	91562.1	100370	77469.3	117473	39912.3	35959.1	36701.4	35952.8
NEG_2639	7.542	269.048	Galangin	[M-H]-	C15H10O5	Phenylpropanoids and polyketides	Flavonoids	C10044	0.841	3984.31	4285.84	4624.49	4050.63	4392.51	3706.64	1464.15	2597.44	1644.39	1587.1	2306.38	1696.97	8111.73	7993.21	11382.6	7025.89	5528.75	3991.14	3473.6	4169.18	3591.74	3468.44	3754	1818.73	2676.22	2552.64	2669.54
NEG_4161	7.565	327.22	9,10-Dihydroxy-8-oxooctadec-12-enoic acid	[M-H]-	C18H32O5	Lipids and lipid-like molecules	Fatty Acyls		0.731	44168.3	32422.2	45411.9	42570.6	35681.4	37868.7	167086	126494	150619	143913	153182	156377	65680.8	60878.4	82608.7	57505.9	82484.4	85194.9	95161.9	82705.9	82064.5	65789.4	105979	37622.5	36226.7	36220.5	36218.7
POS_2118	7.587	237.231	5-Cyclohexadecen-1-one	[M+H]+	C16H28O	Organic oxygen compounds	Organooxygen compounds		0.708	87811.7	71360.9	85028.7	83698	73190.7	82993.2	81707.3	77985	84861.2	79704.1	84071.1	121078	83096.3	104716	80364.7	72731.5	82611.4	115474	80790.8	84796.9	113258	70823.8	108049	95604.5	81417.5	83431.1	81450.8
NEG_10155	7.613	563.144	8-[3,4-Dihydroxy-5-(hydroxymethyl)oxolan-2-yl]-5,7-dihydroxy-2-(4-hydroxyphenyl)-6-[3,4,5-trihydroxy-6-(hydroxymethyl)oxan-2-yl]chromen-4-one	[M-H]-	C26H28O14				0.719	21184.5	20537.8	16986.3	20882.6	22417	23187.2	19551.1	19257.2	20640.5	20460	21771.3	22137.7	18229.3	19019.5	30442.7	19091.3	12664.5	31219.2	27047.7	31003.1	34377.4	34312.8	23061.1	13135.1	16211.2	14242.7	14596.6
NEG_11728	7.626	639.229	[6-(Furan-3-yl)-6,8,12,16,21-pentahydroxy-7,15-dimethyl-9-oxo-3,17,19-trioxaheptacyclo[9.9.3.01,10.02,4.02,7.011,18.015,23]tricosan-14-yl] 2-methylbutanoate	[M+Cl]-	C31H40O12	Lipids and lipid-like molecules	Prenol lipids		0.748	268.819	272.704	63.4383	381.137	493.026	736.957	4442.19	3579.66	3791.41	2623.28	3879.76	3538.84	11494.7	10472.7	13145.9	10537.9	9219.23	452.48	206.448	430.894	236.741	256.517	627.068	2359.79	2881.19	2384.27	2689.76
NEG_3037	7.628	283.064	Genkwanin	[M-H]-	C16H12O5	Phenylpropanoids and polyketides	Flavonoids	C10046	0.862	16447.6	15381.7	15269.9	16723.8	15270.2	17053.6	8948.59	8654.73	8779.85	9023.09	8613.31	8724.22	6195.55	11965.4	18252.8	5674.19	6280.08	2639.6	4156.13	1892.91	3910.19	2007.23	2441.06	6001.59	6337.56	6332.84	6300.73
POS_1413	7.667	197.151	Neryl acetate	[M+H]+	C12H20O2	Lipids and lipid-like molecules	Fatty Acyls	C09861	0.802	84238.6	72571.7	80163.1	73382.7	67811.4	64740.9	92377.6	65713.5	75431.8	81268.9	77680.2	94109.9	83722.2	90484.9	82694.3	74105.4	67962.6	99764.2	72810.8	76057.5	92127	74482	103588	89736.5	85930.2	83196	87512.4
POS_3853	7.671	335.089	8-O-Methylrabelomycin	[M-H2O+H]+	C20H16O6	Phenylpropanoids and polyketides	Angucyclines		0.715	8491.93	7802.82	9012.75	8040.94	7014.23	8247.02	2507.16	2426.03	2259.56	2587.89	2947.04	2652.6	5561.97	5663.36	6836.27	5334.99	6864.48	6010.72	6313.19	5760.59	5475.4	4476.93	6293.7	4709.46	5291.63	4916.72	4985.38
POS_1007	7.679	167.069	Ethylparaben	[M+H]+	C9H10O3	Benzenoids	Benzene and substituted derivatives		0.814	93651.3	77755.2	102834	89510.3	80959.9	84177.2	103450	85508.1	96652.3	95229.6	92503.9	105190	108169	111616	120353	100710	124443	105281	100864	91877.5	97866.9	78291.8	110210	83692.2	77940.4	83403	83699
POS_8896	7.752	551.283	Isogomphrenin I	[M+H]+	C24H26N2O13	Organic oxygen compounds	Organooxygen compounds		0.748	5087.38	3752.29	6224.91	3779.06	3887.68	3800.61	13592.6	8105.2	10646.3	9877.28	9123.09	10070.4	6881.07	7883.56	7967.63	8177.5	8660.61	21862.8	22106.1	19422.3	18452.5	17257	17338.1	8100.63	8373.51	7464.32	9147.46
POS_4547	7.76	361.198	Cortisone	[M+H]+	C21H28O5	Lipids and lipid-like molecules	Steroids and steroid derivatives		0.811	14933.9	13608.6	15499.9	14738.3	14159.9	14485.9	14992.3	16373	14349.1	16202.2	16197.9	20439.1	14326.4	17411	15837.8	14254.6	15064	22088.3	18772.1	18878.1	20311.5	15676.3	21842.7	17084.4	17086.9	16689.5	16933.7
POS_1768	7.819	219.175	3,8-Dimethyl-5-propan-2-yl-4a,5,6,8a-tetrahydro-1H-naphthalen-2-one	[M+H]+	C15H22O	Lipids and lipid-like molecules	Prenol lipids		0.839	167694	149555	154061	181214	135529	136901	179431	132013	172749	145767	147484	228008	157332	224398	168412	151781	180147	235552	180642	189264	226193	173598	236859	183966	163798	188062	181425
POS_2114	7.824	237.185	3,7-Epoxycaryophyllan-6-One	[M+H]+	C15H24O2	Organoheterocyclic compounds	Oxepanes		0.83	92320	68038.7	102767	79959.2	65449.5	68143.9	91431.4	68990.1	94812.7	91239.1	81377.4	113596	72355.7	100536	90628	78890.7	98745.2	118259	100968	85427.4	108567	68921.1	131857	94610.2	88831.7	88397.8	88499.7
POS_3116	7.828	297.057	Disulfiram	[M+H]+	C10H20N2S4	Organic nitrogen compounds	Organonitrogen compounds	C01692	0.916	15721.4	12799	14628.9	14963.4	12952.9	14589.4	18139.8	16539.8	18709.4	18955.7	19285.7	24755.7	10751.1	14123.3	11508.2	9323.29	12955	22556.5	18233.2	16927.6	19260.1	14084.5	23545.4	17129.1	15238.6	15691.8	15207.1
POS_3331	7.829	309.112	(3S,6R,6As,7S)-6,6a,7,8-tetrahydroxy-3-methyl-3,4,5,6,7,12a-hexahydro-2H-benzo[a]anthracene-1,12-dione	[M-2H2O+H]+	C19H20O6	Benzenoids	Tetralins		0.717	10352.5	9561.86	11115.2	10049.7	10210.7	10999.2	672.635	5203.91	6566.45	4951.84	4744.46	5513.65	9157.99	10074.6	9159.94	9814.93	9616.54	25559.6	26757.1	24409.7	23672.1	21888.3	26858.9	9295.61	9656.34	9544.99	9833.33
NEG_1326	7.873	194.082	L-beta-Homotyrosine	[M-H]-	C10H13NO3	Organic acids and derivatives	Carboxylic acids and derivatives		0.774	129430	105347	134778	127544	110318	121593	133205	114255	131329	134193	131990	184391	123017	161801	135640	111679	134842	195147	139944	129508	179088	110363	190714	148330	127666	135843	132798
NEG_3683	7.885	309.204	FA 18:3;2O	[M-H]-	C18H30O4	Lipids and lipid-like molecules	Fatty Acyls		0.825	12716	11127.6	13100.2	11431.9	10293.9	9746.17	37899.7	30409.4	31674.4	35284.3	31382.3	33831.8	5944.44	18845.9	20373.1	16487.8	25216.9	279800	222792	99183.2	92863.4	227020	278368	20694.7	22044.7	15089.6	21443.6
NEG_3966	7.915	321.116	Neobavaisoflavone	[M-H]-	C20H18O4	Phenylpropanoids and polyketides	Isoflavonoids		0.814	6605.92	7862.19	6008.26	8095.24	7878.86	8489.85	18834.6	22477.6	21851.6	20636.1	23589.4	22678.1	3521.15	2986.91	6349.3	4223	1945.09	17729	15407	20620.2	22117.2	20927.8	13001.5	8888.75	10107.6	9849.92	10094.7
POS_5256	7.935	393.163	Furaquinocin C	[M+Na]+	C22H26O5	Organoheterocyclic compounds	Naphthofurans		0.726	14353.8	12888.8	15103	14732.8	13024.5	12721.2	14042.1	12949.4	15755.4	14540.1	14465.6	17795.9	13113	16396.8	14905.5	13118	14387.5	17918.7	12958.1	13666.1	16165.6	11792.6	17076.4	15806.4	14396.5	14704	14385.3
NEG_3145	7.958	285.116	Loureirin A	[M-H]-	C17H18O4				0.746	28997.1	20089.4	28411.4	26804.6	19629.2	25451	29856.2	23733.2	27773.6	28117.9	27701	39401.2	24152.4	32832.1	29454.3	20317	28628.4	44193.3	32354.1	30079.4	43587.9	21677.9	46468.4	29082.9	25295	29091.1	28987.4
POS_6151	7.975	432.239	[1,14-Dihydroxy-8-(hydroxymethyl)-4,12,12,15-tetramethyl-5-oxo-13-tetracyclo[8.5.0.02,6.011,13]pentadeca-3,8-dienyl] acetate	[M+ACN+H]+	C22H30O6	Lipids and lipid-like molecules	Prenol lipids		0.836	355537	251918	349688	274192	275286	277105	262546	214418	243093	247577	242217	242105	312357	323925	361014	319642	368697	284464	248794	228344	248105	228033	284502	208693	211240	208749	221483
POS_5373	7.975	397.199	Methylprednisolone	[M+Na]+	C22H30O5	Lipids and lipid-like molecules	Steroids and steroid derivatives		0.731	26451.9	23339.4	28729.4	25951.2	19822.5	24376.6	22351.1	19636.8	21486	20934.2	22493	22350.2	27743.3	23805.2	29802.2	27723.2	31021.3	26400.1	25381.7	23831.2	20851.9	23703.4	28825.4	21327.7	21258.2	21435.4	21485.7
POS_4319	8.009	353.229	(15Z)-9,12,13-Trihydroxy-15-octadecenoic acid	[M+Na]+	C18H34O5	Lipids and lipid-like molecules	Fatty Acyls		0.788	31549	27099.8	33015.8	29668.1	31328.3	27293.8	37046.7	30917.5	32235.7	39022.1	33079.8	47762.9	30362.3	36396.4	38814.7	31074.7	40579.7	47215.2	36846.4	33650.6	41730.2	30542	46054.8	37507.5	31928.6	36001.8	35348.6
POS_5034	8.069	381.201	4-Hydroxy-3-[(2E,6E)-4-hydroxy-3,7,11-trimethyldodeca-2,6,10-trienyl]benzoic acid	[M+Na]+	C22H30O4	Lipids and lipid-like molecules	Prenol lipids		0.708	2286.06	1722.68	2601	2481.18	2308.13	2255.18	4764.37	4689.38	5159.9	5861.87	5326.04	5760.56	3561.97	3087.1	3111.73	3673.99	4435.53	20486.9	21946.8	19100.1	18134.3	15294.4	23791.6	7312.02	6459.59	7415.61	6722.37
POS_1333	8.142	191.107	3-n-Butylphathlide	[M+H]+	C12H14O2				0.703	2419.5	2536.3	4022.02	3210.44	916.507	3280.16	8674.58	8785.69	9824.61	9131.24	6689.14	8935.88	10948.6	8586.61	11820.2	6372.57	11543.7	54902	57812.1	49753.5	47341.9	44820.8	59407.5	17204.1	16965.8	17359.3	17058.8
NEG_4445	8.198	339.127	Licocoumarone	[M-H]-	C20H20O5	Phenylpropanoids and polyketides	2-arylbenzofuran flavonoids		0.775	75950.3	102248	63375.6	85919.8	101091	95731.3	49579	60028.7	54985.4	53033.9	55810.1	53946	19342.9	22059.2	44403.5	23077.6	11298.4	27083.9	23318.9	31422.7	29301.5	33387.9	20456.5	36210.6	40120.6	38093.5	37656.9
POS_1431	8.242	198.185	1-Octylpyrrolidin-2-one	[M+H]+	C12H23NO	Organoheterocyclic compounds	Pyrrolidines		0.701	12748.3	12192.8	15028	10542.8	13458.3	13390.7	14442.4	14290.8	21418.2	15516.6	15746.6	15877	18159.5	15759.1	14687.1	12467.9	16222.7	15977	13864.6	14701.7	23245.8	11817.6	19968.5	15925.9	13611.3	20228.5	14856.4
POS_5784	8.274	415.21	(1S,2R,4aR,8aR)-1-Acetoxy-7-isopropylidene-1,4a-dimethyl-6-oxodecahydro-2-naphthalenyl 2,3-dimethyl-2-oxiranecarboxylate	[M+Na]+	C22H32O6	Lipids and lipid-like molecules	Prenol lipids		0.859	180318	110570	189975	165934	155903	159410	133688	117540	124828	125638	124201	134726	183824	161390	212778	168437	201587	147774	152244	130512	132360	122920	146422	101448	106213	97927.6	107321
POS_3669	8.278	328.246	(E)-4-[(1R,2S,3S,4R,8As)-2,3,4-trihydroxy-2,5,5,8a-tetramethyl-3,4,4a,6,7,8-hexahydro-1H-naphthalen-1-yl]but-3-en-2-one	[M+NH4]+	C18H30O4	Lipids and lipid-like molecules	Prenol lipids		0.769	11238.8	8323.46	12214.8	10406.9	10179.3	10737.7	22819.1	21248	22768.9	23398.6	21485.9	24823.5	22837.5	18508.6	22017.1	20989	25759.8	20786.7	25909.4	20837.1	19937.8	19376.4	20404.2	15743.7	15744.3	16194.2	15759.9
POS_6277	8.278	437.193	Methyl 3-[(1E,3E)-3,5-dimethyl-1,3-heptadien-1-yl]-8-hydroxy-6a,8-dimethyl-6-oxo-6a,8,9,9a-tetrahydro-6H-furo[2,3-h]isochromene-9-carboxylate	[M+Na]+	C24H30O6	Organic oxygen compounds	Organooxygen compounds		0.814	303277	259286	342332	291774	269450	272483	210166	173197	190164	186034	192897	193559	318696	295356	366960	298690	382828	225916	240028	216194	200251	196705	241729	158152	174310	160281	162309
POS_3519	8.343	318.299	2-Aminooctadecane-1,3,4-triol	[M+H]+	C18H39NO3	Organic nitrogen compounds	Organonitrogen compounds		0.822	479584	417699	533343	477730	424557	469351	440789	419044	438550	444754	431849	558356	616395	638736	587875	536019	606908	610344	541535	515565	544850	450141	615228	485534	501349	469722	489298
POS_5937	8.343	423.213	Fludrocortisone acetate	[M+H]+	C23H31FO6	Lipids and lipid-like molecules	Steroids and steroid derivatives	C00762	0.735	7045.31	6983.92	7409.26	7271.98	6439.89	6578.63	11197.4	10296.3	10567.6	10146.3	10221	11329.5	7590.16	7150.7	7932.93	7311.91	7695.02	43664	46884.1	50393.3	43780.9	48434.8	50042.9	19092.6	23451	20764	21267.5
NEG_8481	8.346	497.165	3,5-Dihydroxy-4-[3,4,5-trihydroxy-6-[[4-(2-hydroxypropan-2-yl)cyclohexene-1-carbonyl]oxymethyl]oxan-2-yl]oxybenzoic acid	[M-H]-	C23H30O12	Lipids and lipid-like molecules	Saccharolipids		0.787	64173.6	45371.5	25994	56169.8	48751.1	19671.9	58934.7	45547.3	59112.3	65239.3	22470.1	70655.2	46100.2	48011.9	56013.5	42791.5	48756	83108.3	29096.6	39142.6	65796.9	49596.2	71339.4	46236.6	46462.2	21762.1	46418
POS_3412	8.347	313.235	Dihydroxyoctadecadienoic acid	[M+H]+	C18H32O4	Lipids and lipid-like molecules	Fatty Acyls		0.709	5989.12	7472.61	10752.3	8854.08	5597.85	5109.54	15838.9	14850.8	17062.5	17503	17250	16201.4	7608.92	2711.15	7997.82	8379.04	12425.2	36289.2	37149.4	36183.9	31524.6	33055	36633.8	15389.6	15908.6	15321.1	16711.1
POS_5985	8.351	425.133	8-(2,3-Dihydroxy-3-methylbutyl)-5,7-dimethoxy-2-phenyl-2,3-dihydrochromen-4-one	[M+K]+	C22H26O6	Phenylpropanoids and polyketides	Flavonoids		0.841	77391.5	68354.6	86564.7	99980.9	78546.1	92513.1	103215	121936	126899	107721	125776	127215	144682	118888	121185	114450	120741	60607.9	61252	85241.6	73421.3	63262.8	58133.8	1532.67	569.83	1532.15	1526.46
POS_6073	8.393	428.892	Tris(1,3-dichloro-2-propyl)phosphate	[M+H]+	C9H15Cl6O4P	Organic acids and derivatives	Organic phosphoric acids and derivatives		0.863	62854.3	60097.9	65894.2	63108.4	65581.2	70480	55734.4	59270.8	62129.5	59330.7	73238.9	60613.7	67009.7	69149.4	59457.8	59151.4	50328.9	66589.3	56528.6	60225.1	71255.1	60389.6	67158.8	60483.7	61514.1	60470.2	68488
POS_5460	8.425	401.205	Reserpic acid	[M+H]+	C22H28N2O5	Alkaloids and derivatives	Corynanthean-type alkaloids		0.707	10156.8	12137.1	9571.83	9919.78	10966	9572.88	10136.7	11658.8	10641.6	9336.12	9928.72	10457.8	13814.1	14486.8	11723.3	12748	11287.5	9585	8645.44	11238.8	10314	13009.5	8362.86	1284.59	1478.65	1406.98	1467.82
POS_1662	8.429	214.25	N,N-Dimethyldodecylamine	[M+H]+	C14H31N	Organic nitrogen compounds	Organonitrogen compounds		0.747	13705.5	10662.6	12438.1	13658	11581.9	12039.5	11319.6	11612.2	12747.2	12507.7	13279.3	17089.6	12368.1	15173.1	12812.4	11453.4	11122	15067.3	11220.6	12636.1	15356.9	10921.7	13412.1	12785.9	11332.7	11596.5	11892.3
NEG_3813	8.442	313.238	12,13-Dihydroxyoctadec-9-enoic acid	[M-H]-	C18H34O4	Lipids and lipid-like molecules	Fatty Acyls		0.785	10946.2	8441.84	17998.4	9571.13	9145.32	11527.9	21611.1	12141.2	18003	18761.2	19111.7	21077.4	20468.4	20658.5	28829.1	19099.5	29655.2	17200.4	13777.1	12955.2	12031.4	11856.7	13530.3	12732.8	13843.4	5009.34	13682.9
NEG_6382	8.458	421.167	Mulberrin	[M-H]-	C25H26O6	Phenylpropanoids and polyketides	Flavonoids		0.924	43014.6	45547.3	40250.3	47299.2	44910.8	48018.9	882.492	1365.85	1129.64	1212.09	1010.27	3975.52	1392.88	1518.28	2064.12	1575.7	942.266	1081.89	1022.57	1104.41	1010.43	570.042	1292.48	7877.01	8752.59	8747.01	8553.18
POS_3649	8.487	327.077	Triphenyl phosphate	[M+H]+	C18H15O4P	Organic acids and derivatives	Organic phosphoric acids and derivatives	C06017	0.842	43698.4	45957.5	42172.7	43311.8	45326.8	39551.2	44536.9	45977.7	46350.9	40584.7	48124.9	52636.1	43749.7	49767.8	41542.2	38463.3	47999.4	50479.9	49980.2	42787.9	52999.1	45988.5	52392	48911	49182.7	43734.4	49173.5
POS_8925	8.501	553.236	(1R,2R,3R,3aS,5aS,6R,7R,10R,10aR,10cR)-1,2,6,7-Tetrahydroxy-3,7,10a,10c-tetramethyl-4-oxo-2,3,3a,4,5a,6,6a,7,10,10a,10b,10c-dodecahydro-1H-phenanthro[10,1-bc]furan-10-yl beta-D-glucopyranoside	[M+Na]+	C25H38O12	Lipids and lipid-like molecules	Prenol lipids		0.706	9631.23	10529.6	10191.8	8917.67	7736.5	7598.99	10379.1	7490.99	10062.5	9337.94	7940.69	11807.9	9821.88	12724.5	9188.26	9382.83	10643.1	13048	9977.72	10123.7	11282.4	9613.64	14697.4	9846.48	9825.45	9718.45	9846.46
POS_1464	8.524	200.235	N-Methyldodecylamine	[M+H]+	C13H29N	Organic nitrogen compounds	Organonitrogen compounds		0.815	128376	111197	116868	115733	113295	113562	128644	118402	115030	118477	117886	129403	119674	129486	133873	115375	120443	115766	127213	118780	124631	113954	129881	131370	121116	121410	121109
NEG_3259	8.542	291.196	FA 18:4;O	[M-H]-	C18H28O3	Lipids and lipid-like molecules	Fatty Acyls		0.917	79925.2	69709.5	84425.1	79592.2	70842.1	77257.1	168301	140751	141741	151861	145945	152288	179604	174621	208210	168140	212580	293436	294520	278381	277228	260915	290977	83045.3	83600.9	85994.3	83051.2
POS_3045	8.547	293.21	9s,13r-12-Oxophytodienoic Acid	[M+H]+	C18H28O3	Lipids and lipid-like molecules	Fatty Acyls		0.83	87029.8	78921.1	93089	83665.5	77623.9	80307.1	166983	145385	155219	151996	154306	161410	179639	198299	217068	174119	220963	280311	142107	184164	181211	179008	297684	171124	174900	167474	172516
POS_2580	8.547	265.187	Ammothamnine	[M+H]+	C15H24N2O2				0.783	29792.5	17638.3	35342	28425.1	23113.9	23890.7	28725.7	23389.1	30902.9	26755.2	31267.4	42047.1	29585.1	37604.6	25652.4	22078.8	26330.5	34703.7	28238.4	26617.7	31592.1	19046.3	30416	28243.3	25659.8	22263	27055.5
POS_3633	8.554	325.237	(2S,3S)-4-Methylidene-5-oxo-2-tridecyloxolane-3-carboxylic acid	[M+H]+	C19H32O4	Organoheterocyclic compounds	Lactones		0.705	23654.8	21419.3	24097	20926.3	20240	21082.9	47962.4	41667.7	43321	43441.3	50223	45710.4	37172.7	43925.3	42538.8	28782.3	42176.2	60739.5	56505.9	46823	48934.9	47034	72702.3	38084.9	40644	35051.1	38830.4
POS_2766	8.574	277.18	1,8-dimethyl-6-oxo-7-(propan-2-ylidene)-2,3,4,8-tetrahydro-1H-naphthalen-2-ylacetate	[M+H]+	C17H24O3				0.716	415991	334626	394897	374615	351508	375645	400135	380133	397079	408037	405727	550352	372074	537347	407324	357176	412270	546772	408513	364973	523442	366042	545464	470414	412635	421661	412578
NEG_3810	8.587	313.238	FA 18:1;2O	[M-H]-	C18H34O4	Lipids and lipid-like molecules	Fatty Acyls		0.808	16134.4	13276.7	14900.7	31578	15458.4	15109.4	50577.2	42737.9	41679.9	42465.4	44353.3	44389.5	56957.4	56660.8	63252.8	55155.9	56732.5	32315.2	38163.1	36985.5	33316.1	26910	29121.5	19759.7	19636.5	20438.9	19942.9
POS_5788	8.602	415.213	6-[3-[(3,4-Dimethoxyphenyl)methyl]-4-methoxy-2-(methoxymethyl)butyl]-4-methoxy-1,3-benzodioxole	[M-H2O+H]+	C24H32O7	Lignans, neolignans and related compounds	Dibenzylbutane lignans		0.792	56182.3	48049.2	65307.3	55289.8	49259.7	52503.7	126737	100419	110561	99715.7	107039	112076	60296.7	57526.9	65344.9	54818.1	66001.1	40843.9	48857	40396.6	38881.9	37393.6	51046.3	51368.7	53070.8	47584.1	51916.8
POS_7501	8.615	493.281	Cyclo(VVFF)	[M+H]+	C28H36N4O4	Organic acids and derivatives	Carboxylic acids and derivatives		0.756	49995.9	37085.2	51781.4	45073.8	40406.5	42215.8	102429	85246.3	91349	82513.7	95277.5	100464	69703	72049.4	82135.4	62087	81990.1	29020.5	28031	20447.4	28551.3	22934.1	30284.8	48799.7	48804.5	45865.1	48800.4
POS_3618	8.635	325.141	Isobavachalcone	[M+H]+	C20H20O4	Phenylpropanoids and polyketides	Linear 1,3-diarylpropanoids	C08648	0.824	122592	90488.6	121313	106403	95747.6	102405	54118.5	41954	46347.8	46531.2	47290.4	48142.5	60342.7	59248.4	70853.2	53008	66927.9	51631.5	56175.3	44480.1	47282.7	42861.8	53399	51517.9	49363.7	51514.6	51512.7
NEG_4013	8.637	323.134	Bavachin	[M-H]-	C20H20O4	Phenylpropanoids and polyketides	Flavonoids		0.932	3.13885e+06	3.80241e+06	2.42325e+06	3.7034e+06	3.59344e+06	3.97292e+06	1.33725e+06	1.93333e+06	1.9285e+06	1.58057e+06	1.96064e+06	1.86794e+06	862521	878131	2.48668e+06	909260	504967	1.21862e+06	1.03111e+06	1.64217e+06	1.75916e+06	1.71506e+06	931367	1.47605e+06	1.75292e+06	1.69791e+06	1.77224e+06
POS_3084	8.644	295.223	9-Oxooctadeca-10,12-dienoic acid	[M+H]+	C18H30O3	Lipids and lipid-like molecules	Fatty Acyls		0.737	96323.9	74217.8	101078	79577.6	82265.5	80886.1	159450	128803	134686	131569	144767	132837	112681	113054	125373	100276	138149	286626	264489	245579	240002	198508	317989	115422	124724	109220	117043
NEG_3765	8.648	311.226	9-Hydroperoxyoctadeca-10,12-dienoic acid	[M-H]-	C18H32O4	Lipids and lipid-like molecules	Fatty Acyls		0.901	388405	357798	384685	388768	340698	367712	759710	601280	638187	722394	675243	697431	389192	378579	452054	354974	439007	1.08047e+06	1.15197e+06	1.0269e+06	1.07141e+06	1.00047e+06	1.16909e+06	286021	306092	305017	306090
POS_4835	8.656	372.231	Tamoxifen	[M+H]+	C26H29NO	Phenylpropanoids and polyketides	Stilbenes	C07108	0.89	328998	234678	273272	299039	268446	273786	276052	277275	297264	295936	317095	417375	281108	376901	291695	238639	283897	405504	284911	305641	398034	242216	387132	334724	274829	280692	275111
POS_3994	8.658	339.213	Pseudocopsinine	[M+H]+	C21H26N2O2				0.789	33780.9	25066.4	31618.8	26673	22822.2	23927.5	15510.9	14563.5	12759.5	15227.3	12875.8	14385.2	13092.3	21732.3	13764.8	20144.2	16537.4	20084.3	16182.6	15305.9	13951.3	14928.3	19207.7	14319.8	17093.5	14326.3	14301.6
POS_4589	8.662	363.211	Hydrocortisone	[M+H]+	C21H30O5	Lipids and lipid-like molecules	Steroids and steroid derivatives	C00735	0.762	5001.34	3008.74	2546.03	3106.33	2560.51	3433.27	2889.54	1355.92	3072.47	3171.62	6495.53	3878.95	3140.81	2015.41	2619.29	2400.81	2684.99	49443.9	51427.3	43462	47159	32995.4	41910.7	5038.71	3869.84	4072.64	4283.64
POS_4097	8.758	343.295	Lauramidopropylbetaine	[M]+	[C19H39N2O3]+	Organic acids and derivatives	Carboxylic acids and derivatives		0.898	59426.4	55168.8	61529.5	59483.9	54840.4	55107.5	52940.2	48756.1	55155.8	53132	54518.8	61344.7	56166.5	64979.8	59564.3	42856.7	60497.9	119258	115777	108968	111615	87563.4	119873	57468.4	49250.5	51358.4	50071.5
NEG_4535	8.804	341.21	2-Hydroxy-6-[(8Z,11Z)-pentadeca-8,11,14-trienyl]benzoic acid	[M-H]-	C22H30O3	Benzenoids	Benzene and substituted derivatives		0.705	12792.5	11132.3	14038.2	14758.9	10668.9	15287.6	12966.4	14454.4	14443.2	11329.9	14907.7	17131.1	14039.6	15527	11358.6	10892.7	12848.4	15608.9	12441.5	14261.7	19232.5	10941.6	15034.2	12078.9	11456.5	12601.1	12579.5
NEG_4090	8.831	325.237	Nephromopsic acid	[M-H]-	C19H34O4	Organoheterocyclic compounds	Lactones		0.703	10244.5	10580	9571.3	12385.4	10828	10554.5	12691.9	15381.6	13575.7	11322.9	13762.4	16752.4	10451.7	12364.2	10667.9	9229.15	10294.9	24792.7	22808.5	25887.1	27757.4	24110.7	25415.2	10454.2	9585.85	12144.9	10164.8
NEG_5006	8.836	363.198	(3R,8R)-10-[(2R,5R)-3,5-Dihydroxy-6-methyloxan-2-yl]oxy-3,8-dihydroxyundecanoic acid	[M-H]-	C17H32O8	Organic oxygen compounds	Organooxygen compounds		0.768	367.934	211.034	378.552	487.59	229.155	319.29	574.557	496.608	831.91	513.803	607.295	578.62	1259.77	1280.18	3744.61	1626.06	756.735	1713.12	1541.09	2289.76	2279.82	1988.22	1260.06	1276.1	1308.18	967.145	1388.55
POS_1990	8.852	230.246	N,N-Dimethyldodecylamine N-oxide	[M+H]+	C14H31NO	Organic nitrogen compounds	Organonitrogen compounds		0.808	32568.3	31095.2	32500.3	28534.2	29728.2	32233.9	33418	31891.6	31339.3	29167.2	30904.8	37608.3	34422.7	37574.3	32542.5	27191.3	30689.5	32757.8	30785.5	25675.6	32666.4	31389.1	32505.2	34555.5	34347.7	33964.9	34093.7
POS_3258	8.869	304.298	Benzododecinium	[M]+	C21H38N	Benzenoids	Benzene and substituted derivatives		0.72	161246	140662	151562	154354	145526	145803	151692	149256	156896	153557	157608	180778	162917	177718	164122	158004	162844	167033	149217	154295	162655	136332	164583	161030	157651	156761	158783
NEG_2583	8.882	265.126	Magnolol	[M-H]-	C18H18O2	Benzenoids	Benzene and substituted derivatives		0.843	16082.8	18177.7	13504.2	18840.5	17211.9	18978.6	45306.6	51017.8	52625.4	46293.7	52627.5	52877.9	25858.9	25721.7	40426.1	25300.6	14234.6	14041.2	12297.2	17130.7	17552.1	16112.1	11473.5	16341.8	17678.1	17630.6	17613.2
POS_2983	8.905	288.291	C17-Sphinganine	[M+H]+	C17H37NO2	Organic nitrogen compounds	Organonitrogen compounds		0.842	3.29909e+06	2.91706e+06	3.25368e+06	3.25962e+06	3.00312e+06	3.13406e+06	3.3906e+06	3.29573e+06	3.5794e+06	3.45869e+06	3.44574e+06	4.44696e+06	3.80625e+06	4.53049e+06	3.68363e+06	3.71794e+06	3.5567e+06	3.9998e+06	3.13497e+06	3.19562e+06	3.86131e+06	2.83647e+06	3.95861e+06	3.67491e+06	3.3133e+06	3.33286e+06	3.32395e+06
POS_4048	8.982	341.089	Swietenocoumarin F	[M+Na]+	C17H18O6	Phenylpropanoids and polyketides	Coumarins and derivatives		0.702	12165.9	8895.02	10009.7	12165.8	10875.3	12743	10507	12025.2	10719.2	9522.07	12577.9	13201.5	10285.7	9961.83	11190.6	9728.87	11177.8	14006.3	10457.4	12820.3	12512.8	10290.7	11795.8	12362.7	10918	12109.2	12365.1
POS_3517	8.994	318.238	Drofenine	[M+H]+	C20H31NO2	Benzenoids	Benzene and substituted derivatives		0.772	35935.9	38693.5	41084	37804.4	34804.7	32656.1	39179.2	34676.3	39482	38361.5	37939.2	36853.5	36465.6	37362	38208.8	36126.9	32911.4	35204	34298.8	34291.3	33927.4	33321.2	32565	41028.3	41031.2	38468.9	40706.2
POS_741	9.002	150.112	Phentermine	[M+H]+	C10H15N	Benzenoids	Benzene and substituted derivatives	C07438	0.902	1.668e+06	1.58242e+06	1.51473e+06	1.73083e+06	1.69262e+06	1.52298e+06	1.55675e+06	1.54433e+06	1.54744e+06	1.51009e+06	1.62122e+06	1.53861e+06	1.54857e+06	1.43317e+06	1.51605e+06	1.54905e+06	1.43007e+06	1.40562e+06	1.68581e+06	1.50215e+06	1.42692e+06	1.6177e+06	878446	1.44258e+06	1.52121e+06	1.50668e+06	1.52108e+06
NEG_3261	9.005	291.198	8-(2-Oxo-5-pent-2-enylcyclopent-3-en-1-yl)octanoic acid	[M-H]-	C18H28O3	Lipids and lipid-like molecules	Fatty Acyls		0.773	10013.1	13374.8	15998.6	15312.6	16365.9	14980.2	51927.8	45478.2	49297.5	49523.2	51208.2	49768.3	35583.7	34226.5	38551.1	33924.3	31676.4	116617	102976	118916	120886	120203	102146	35751.2	35754.9	38069.2	35766.6
POS_6346	9.028	440.277	1-Dodecanoyl-sn-glycero-3-phosphocholine	[M+H]+	C20H42NO7P	Lipids and lipid-like molecules	Glycerophospholipids		0.934	74457.1	62850	79117.8	63029.6	61341.6	66070.7	22519	19081.8	18561.6	20700.7	19172.3	20161.8	15573.6	15024.5	15499.5	15058.9	17791	310513	326985	293043	270417	267245	331293	76474.3	75183.3	78824.7	77232.1
POS_3858	9.04	335.184	Strychnine sulfate	[M+H]+	C21H22N2O2.1/2H2SO4				0.74	20281.8	18381.9	25300.6	23275.3	20738.3	20517	20500	19506.2	24733.5	22189.3	25002.1	31693	20823.8	26482.1	20915.4	20127.3	21850.3	29226.8	22377.2	22293.8	26980.1	22946	28529.2	24205.3	20255.3	22213.5	22758
POS_2610	9.043	267.173	Triisobutyl phosphate	[M+H]+	C12H27O4P	Organic acids and derivatives	Organic phosphoric acids and derivatives		0.854	341636	289079	321884	296200	289589	310872	300812	323452	326887	338294	344671	363444	330867	341276	297366	302341	291646	384726	297971	332371	371790	300118	361585	342954	314998	318564	323822
NEG_3876	9.062	315.256	FA 18:0;2O	[M-H]-	C18H36O4	Lipids and lipid-like molecules	Fatty Acyls		0.85	19125.7	23727	17751.4	20133.8	14454.8	17611.2	21012.7	31628.6	21516.5	24630.9	22675.1	25609.9	40425.5	44265.6	44584.9	37182.2	42684.1	25593.8	19195.5	20770.2	25344.5	17494.6	23642.5	20495.7	16279.2	18342.3	17734.6
POS_3460	9.069	315.192	1,4a-Dimethyl-9-oxo-7-propan-2-yl-3,4,10,10a-tetrahydro-2H-phenanthrene-1-carboxylic acid	[M+H]+	C20H26O3	Lipids and lipid-like molecules	Prenol lipids		0.786	22976.6	23808	22895.7	23641.9	23082.4	19997.3	37528.8	35544.7	43895.6	30051.9	33874.1	44383.9	30927.4	27453.5	34206.7	27492.2	31174.1	33765.4	58707.1	57844.3	25364.5	24687.9	31150.5	26900.9	25685.3	26601.3	26935.2
POS_3493	9.075	317.115	(1E,4E)-1,5-Bis(4-methoxyphenyl)penta-1,4-dien-3-one	[M+Na]+	C19H18O3	Benzenoids	Phenol ethers		0.73	24163.1	20825.9	20057.7	21668.1	22156	20217.2	20849.8	21645.3	22481.4	21487.2	23188.6	28557.1	21947.2	26199.5	19223.8	20043	20887.7	23316.5	19545.3	22210.8	25181.2	20949.2	25546.6	25160.7	23936.7	23441.3	24409.7
POS_2973	9.093	288.253	Lauryl diethanolamide	[M+H]+	C16H33NO3	Lipids and lipid-like molecules	Fatty Acyls		0.876	70975	57177	65621.7	75143.5	63510.6	67998.6	67669.7	62727	65401.3	66661.2	71273.5	73660.9	64001.3	71794.4	62662.4	61756.2	73609.3	75260.4	54936.2	69420.2	70486.3	61915.7	68590.4	64299.3	59126.8	75280.8	62536.7
POS_4260	9.103	351.253	5-(5-Methoxycarbonyl-5,8a-dimethyl-2-methylidene-3,4,4a,6,7,8-hexahydro-1H-naphthalen-1-yl)-3-methylpentanoic acid	[M+H]+	C21H34O4	Lipids and lipid-like molecules	Prenol lipids		0.742	67711.8	53910.1	67465.6	53106.9	53103.3	49686.6	185785	150572	151577	143797	164308	175322	181183	179862	224053	190043	214027	400074	394312	355182	350923	312993	422097	163307	146754	163255	163237
NEG_2586	9.128	265.149	Lauryl sulfate	[M-H]-	C12H26O4S	Organic acids and derivatives	Organic sulfuric acids and derivatives		0.926	1.27016e+06	1.02053e+06	1.25517e+06	1.27012e+06	1.04849e+06	1.21127e+06	690731	621182	645172	653747	678918	836834	610126	705698	675577	547546	646358	974475	804985	815453	988554	729063	999912	646443	587520	651963	640360
POS_3047	9.13	293.21	8-[3-Oxo-2-[(E)-pent-2-enyl]cyclopenten-1-yl]octanoic acid	[M+H]+	C18H28O3	Lipids and lipid-like molecules	Fatty Acyls		0.709	58953.4	35717.7	53564.7	51607.3	35145	44095.4	43414	44864.9	69266.1	66764.8	68745.2	80247	37049.8	55363.9	46010.3	25961.2	39081.9	223388	207683	192374	171387	129018	203250	84294.5	71496.3	71206.8	75334.8
POS_3507	9.14	317.211	Cafestol	[M+H]+	C20H28O3	Organoheterocyclic compounds	Naphthofurans		0.713	10854.9	13556	17754.4	16231.9	13932	13462.6	26466.3	20038	26508	25929.5	17764.2	25487.8	35464.8	33850.6	54258.9	38091.5	49131.4	37873.3	33985.5	32512	32650.3	25637.7	33997.2	26145.9	22737.2	24642.7	25176.9
NEG_3340	9.14	293.216	8-hydroxyoctadeca-9,12,15-trienoic acid	[M-H]-	C18H30O3	Lipids and lipid-like molecules	Fatty Acyls		0.803	79506.9	73652.2	78685.5	79542.8	68880.1	79859.8	134475	135393	134256	131099	133772	139384	226382	226474	239767	216068	223247	196344	169455	211809	216019	213329	186814	83980.8	84002.3	86085.4	85290.3
NEG_3153	9.165	285.207	Hexadecanedioic acid	[M-C6H10O4-H]-	C16H30O4	Lipids and lipid-like molecules	Fatty Acyls	C19615	0.711	11548.6	10481.3	12293.7	13101.9	10069.5	10048.4	10998	10715.9	11366.4	10631.5	10840.7	14164.1	11079.8	11945.5	11199.2	9435.5	13260.9	13400.5	10958.7	11738.8	16570.1	9083.93	16403.4	10264.4	10099.2	11250.7	9793.29
NEG_3412	9.174	297.153	4-(Decan-4-yl)benzenesulfonic acid	[M-H]-	C16H26O3S	Benzenoids	Benzene and substituted derivatives		0.835	138091	124712	143761	149019	137090	131928	127438	134236	125076	136365	140351	165659	131007	161073	144478	112752	136804	192771	155517	176286	199009	145799	199362	132435	112140	134559	129752
POS_2708	9.187	273.185	Galaxolidone	[M+H]+	C18H24O2	Organoheterocyclic compounds	Benzopyrans		0.769	22276.7	17328.3	17771	18148.7	13953.8	16525.4	13973	19485.4	19052.7	19789.3	17621.1	22247.5	17134.6	18142.3	18405.3	17586.1	18387.9	24939.7	13864.7	16677.6	20489.1	17254.4	21016.6	20280.5	20281	17577.2	20297.3
NEG_3875	9.321	315.254	Methyl hexadecanoate	[M-H]-	C17H34O2				0.9	93661	78506.6	89286.4	93788	78213.3	89324	98125.1	92297.8	92976.9	95849.6	95943.1	130187	95091.4	120328	99971.4	84936.4	102688	128401	96118.4	101533	132536	86621.2	132380	107763	87092.8	99625.5	97003.8
NEG_4020	9.327	323.221	4-Methyl-5-oxo-2-tridecyl-2H-furan-3-carboxylic acid	[M-H]-	C19H32O4	Organoheterocyclic compounds	Dihydrofurans		0.824	20385.6	17642.4	20114.9	19397.8	19077.3	18712.7	18664	20983	22811.7	19357.3	19355.1	20938.7	18924.7	19985.5	17061.6	19633.8	18926.2	22956.2	22165.4	24728.8	26136.4	23963.3	22257.6	19394.7	20167.9	19694.7	21421.8
POS_5422	9.348	399.248	Tris(2-butoxyethyl) phosphate	[M+H]+	C18H39O7P	Organic acids and derivatives	Organic phosphoric acids and derivatives		0.917	376058	379852	410849	364857	357788	395327	410003	424319	401973	440614	407481	457092	379481	396315	406576	383411	384718	406212	382661	402338	389059	380807	398681	422548	419892	421823	422367
NEG_2056	9.371	235.17	Dihydroartemisinic acid	[M-H]-	C15H24O2				0.711	34647.5	30465.1	33889.9	35880.3	28528.4	32859.4	35312.1	30097.1	34416.8	35186.1	32794.4	42869.2	33505.5	39929.5	40308.9	37062	36607.4	46726	34915	41635.3	49881.1	35243.1	47745.7	37094.2	33173.3	38916.2	35350
POS_9576	9.379	583.249	Biliverdin	[M+H]+	C33H34N4O6				0.714	10548.8	10917.3	12817.4	11463.5	9939.12	11930.8	8018.01	6352.49	7002.08	6236.76	6563.25	6979.93	6751.23	7416.13	6262.45	6896.83	7690.83	3575.67	3955.63	2498.33	3054.9	2680.91	3952.27	6813.88	7584.95	7300.85	7186.67
POS_3309	9.389	307.227	(6E)-Heptadeca-6,16-diene-1,2,4-triol	[M+Na]+	C17H32O3	Lipids and lipid-like molecules	Fatty Acyls		0.733	49653.5	29922.1	48783.9	49637.1	49099.2	46555	56081.6	50584.8	54670.6	57663.2	56025.9	50375.7	19688.1	33113	36254.7	25428.8	31582.4	168761	183405	156648	148319	145672	183535	75374.1	76356.8	75236.9	78235.3
NEG_3341	9.393	293.216	13-HoTrE	[M-H]1-	C18H30O3	Lipids and lipid-like molecules	Fatty Acyls		0.794	56124.8	108089	55043	57845.5	48931.6	56445	433133	414955	427421	431426	437583	424874	436640	432765	490425	421425	403812	554588	512232	1.02341e+06	1.07188e+06	612127	759560	165716	164341	169583	167583
POS_4058	9.517	341.207	Poldine	[M+H]+	[C21H26NO3]+	Benzenoids	Benzene and substituted derivatives		0.773	7629.84	7833.41	10948.3	10675.1	9133.14	6029.66	32088.2	26820.6	29448.7	22033.8	29175.8	32166.8	57641.7	53456.8	64971.7	50379.9	55456.5	55673.5	56219	48843.5	44293	45905	49094	25649.6	27218	24618.1	25921.1
NEG_4776	9.519	353.187	Humantenine	[M-H]-	C21H26N2O3				0.776	4254.3	2871.4	4266.52	3405.61	5168.69	3754.79	25697.4	20884.3	23698.9	23195.5	23967.8	22289.9	45227.2	40268.9	50237.7	38954.4	45491.3	24430.2	23029.3	27104.7	30189.2	24054.3	21453.9	11527.7	11495.8	11726	11721
POS_2484	9.522	258.278	1-Tetradecanamine, N,N-dimethyl-, N-oxide	[M+H]+	C16H35NO	Organic nitrogen compounds	Organonitrogen compounds		0.716	86343.7	75158.8	93873.9	78870.3	76837.4	82675.6	120074	107458	109474	103712	113295	134160	105850	113751	77488.5	116177	72460.1	107445	97334.6	93655.6	104702	84109	107594	128723	116488	125293	123694
NEG_3762	9.527	311.225	(9Z,15Z)-12,13-Dihydroxyoctadeca-9,15-dienoate	[M-H]-	C18H32O4	Lipids and lipid-like molecules	Fatty Acyls		0.835	6942.3	2842.79	9485.46	9060.15	6317.48	7129.19	16278.6	14500.4	17652.4	16217.9	16461.5	14323.9	23168.5	22954.3	28317.5	22523.1	22633.1	19785.1	19431.1	33603.1	22883.3	34004.8	17605.8	14644.4	16152.5	15261	15310.6
POS_8957	9.592	555.233	2-[(2R,4As,8S,8aS)-8-[2-[(4aS,7R,8aR)-7-(1-carboxyethenyl)-1-hydroxy-4a-methyl-2-oxo-6,7,8,8a-tetrahydro-5H-naphthalen-1-yl]ethyl]-4a-methyl-7-oxo-1,2,3,4,8,8a-hexahydronaphthalen-2-yl]prop-2-enoic acid	[M-H+2Na]+	C30H38O7	Lipids and lipid-like molecules	Prenol lipids		0.738	9888.67	7622.3	10040.4	10137.8	8146.15	9706.84	12295.6	10005	13428.6	10264.8	10932.8	13412.7	10078	12010.2	9762.74	9833.18	10718.8	10615.6	9029.37	8360.45	11547.7	7384.32	11843.3	11075.8	9529.26	12622.7	10781.6
POS_3124	9.638	297.206	Hydrocinchonine	[M+H]+	C19H24N2O	Alkaloids and derivatives	Cinchona alkaloids		0.754	2.96733e+06	2.4879e+06	3.19853e+06	2.799e+06	2.55097e+06	2.6581e+06	599313	507555	549738	532229	537940	537480	92501	104246	96899.2	93586.1	108332	2.07893e+06	2.12993e+06	1.94985e+06	1.81572e+06	1.70929e+06	2.1032e+06	1.16924e+06	1.17096e+06	1.16932e+06	1.17905e+06
POS_4092	9.739	343.22	2-[(2'R,8R,8aS)-2',4,4,7,8a-Pentamethylspiro[2,3,4a,5-tetrahydro-1H-naphthalene-8,5'-oxolane]-2'-yl]acetic acid	[M+Na]+	C20H32O3	Lipids and lipid-like molecules	Prenol lipids		0.803	7376.79	7981.27	5704.86	4154.74	7736.67	4630.37	43031	38961.6	37171.5	37918.6	39128.6	37588.7	73663.7	73390.2	85681.1	75212.8	91269.6	45214.8	46876.5	44338.6	41807.5	38050.2	45638.8	31561.5	32593.4	32338.2	32433.2
POS_2391	9.741	255.084	2-Isopropylthioxanthone	[M+H]+	C16H14OS	Organoheterocyclic compounds	Thiochromenes		0.751	11107.7	9884.76	12731.6	10402.7	10578.6	10345.4	11957.1	9723.34	9575	10553	11193.2	9692.13	12970.7	13766.6	14184.9	12559.7	15311.8	12245.4	12821.1	10541.1	10104.7	10631.4	11159.5	9173.7	10112.8	9726.99	9599.44
POS_3914	9.741	337.216	Acebutolol	[M+H]+	C18H28N2O4	Organic oxygen compounds	Organooxygen compounds		0.738	5621.33	3335.34	2083.27	4131.17	3661.74	2872.27	15998	12640.8	13096.9	13918.4	13454.4	16670.8	18277.3	19864.7	27264.5	19363.7	28947.7	16468.4	15851	10990.3	15713.1	13673.6	21503.4	13628.2	13989.5	14850.4	12442.6
NEG_3815	9.747	313.241	(12Z)-9,10-Dihydroxyoctadec-12-enoic acid	[M-H]-	C18H34O4	Lipids and lipid-like molecules	Fatty Acyls	C14828	0.766	2663.22	3757.91	3626.57	7844.41	4219.88	4730.03	6204.87	8316.95	8406.85	8035.59	8013.22	13303.6	14137.2	13880.3	11948.8	12408.6	10085.9	7223.62	7249.59	11243.4	9923.1	7391.12	9666.17	5337.12	5338.01	6567.89	5515.09
NEG_2648	9.751	269.159	Estrona	[M-H]-	C18H22O2	Lipids and lipid-like molecules	Steroids and steroid derivatives		0.773	3277.68	2975.37	2776.68	3007.54	3176.17	3638.74	5728.55	7857.42	7121.87	5731.85	7338.6	7077.35	2800.78	3458.71	5551.94	2742.88	2769.45	3092.63	3159.77	2710.39	3336.46	3036.08	1851.63	3676.23	3050.44	4101.36	3530.87
NEG_13129	9.752	721.373	[2-Hydroxy-3-[3,4,5-trihydroxy-6-[[3,4,5-trihydroxy-6-(hydroxymethyl)oxan-2-yl]oxymethyl]oxan-2-yl]oxypropyl] octadeca-9,12,15-trienoate	[M+HCOO]-	C33H56O14	Lipids and lipid-like molecules	Glycerolipids		0.768	19467.1	22713.9	17642.2	21339.2	22650	21389.6	29203.8	36829.7	35371.1	28831.8	33569.3	37577.9	17097.6	18814.5	36249.7	17606.7	11790.4	24995.9	23157.4	30537.9	30407.2	30458.3	19949.4	20217.9	20220.3	19084.5	20012.9
POS_7509	9.772	493.313	Primulin	[M]+	C23H25O12	Phenylpropanoids and polyketides	Flavonoids		0.788	69597.5	90663.8	73846.4	70591.8	67707.2	73972.2	72988.9	81343.9	79076.8	68549.8	72370.3	78915.6	74923.6	75410.3	64818.4	68802	70238.6	65170.4	70387.6	65830.5	86808	76795.1	57622.7	80735.9	82523.1	80756.6	89890.9
POS_6395	9.794	443.204	Trichoverrol A	[M+Na]+	C23H32O7	Lipids and lipid-like molecules	Prenol lipids		0.804	16733.5	13789.6	17848.8	16511.2	14995.1	15269.8	19709.8	14887.8	15297.8	16016.4	15758.2	18545.5	17209.1	21817.2	21098.9	17256.2	21072.3	30356.1	30084.3	25238.8	28376.8	23282.2	35479	16567	14872	15290.4	14607.5
POS_2744	9.802	275.2	Nandrolone	[M+H]+	C18H26O2	Lipids and lipid-like molecules	Steroids and steroid derivatives	C07254	0.754	3569.43	12051	10519.2	14745.1	9895.82	14044.4	22805.5	17633.7	19386.5	21507.7	20294.4	18899.9	17761.1	19201.5	19907.7	18804.3	21808.3	147220	156463	133949	125960	115036	155035	40757.9	40474.7	42730.4	40475.1
NEG_5401	9.846	381.204	1-Myristoyl-sn-glycerol 3-phosphate	[M-H]-	C17H35O7P	Lipids and lipid-like molecules	Glycerophospholipids		0.888	19096.1	25665.7	17882	21069.6	23742.2	20016	16246.6	14919.8	15018	13338.8	16607.3	15112.1	7480.34	4665.19	11375.2	9303.39	10292.2	41506.3	35764.8	44797.7	45927.7	53421.4	33771	15117.5	16141.7	16136.2	15893.6
NEG_4400	9.874	337.145	Licochalcone A	[M-H]-	C21H22O4				0.754	19709.6	14750.1	17784.1	19325	14792.2	18389.2	18785.4	17430.3	18338.1	17953.9	19992.6	23866	16611.3	20183.5	19207.8	13846.6	18558.2	22764.7	18216	21068.3	26741.6	15182.7	23136	20176.1	18909	21571.1	20707.4
POS_2941	9.878	286.274	Pentadecanoyl-EA	[M+H]+	C17H35NO2	Organic nitrogen compounds	Organonitrogen compounds		0.743	291861	284681	291669	286301	275890	281100	267538	274418	286299	267527	278681	263944	274246	296247	272957	276301	275205	285457	273185	267595	271662	260933	281487	296108	286197	287952	286413
NEG_8609	9.893	502.301	Phosphatidylcholine lyso 18:3	[M-CH3]-	C26H48NO7P	Lipids and lipid-like molecules	Glycerophospholipids		0.781	9222.34	12303.2	7300.99	9035.56	11925.1	10752.1	10372.7	14624.5	12851.9	11701.9	14947.4	11823	16862.9	17427.4	34031.1	19244.8	10401.6	9081.61	6944.25	9808.11	10833.5	11776	6715.77	12163.5	11756.6	12447.5	12013.2
NEG_3375	9.913	295.228	9-Hydroxy-10E,12Z-octadecadienoic acid	[M-H]1-	C18H32O3	Lipids and lipid-like molecules	Fatty Acyls		0.917	50299	83464.4	79966.8	86348.2	54902.7	83744.8	207778	199627	192991	144498	209712	196382	208664	211519	222746	212322	170427	243934	213138	279861	295818	313424	194646	78400.5	78856.9	83132.5	78458.6
POS_3304	9.959	307.225	h_61_17_Epioxandrolone	[M+H]+	C19H30O3	Lipids and lipid-like molecules	Steroids and steroid derivatives		0.768	76482.9	71584.4	71827	72388.1	70287.9	68007.9	83360.6	74169.4	79478.9	81554.7	78484.5	80749.2	86579	82387.1	84729.7	83133.8	89131.6	171835	173692	90816.2	165787	157425	191878	73361	70718.1	92070.7	70756.8
NEG_9365	9.963	529.302	Kukoamine B	[M-H]-	C28H42N4O6				0.79	8500.65	6920.5	7978.63	7942.11	6238.66	8375.72	5990.47	5580.37	6292.54	7038.91	7283.43	8073.13	6260.48	6237.22	6313.42	5039.68	6432.03	21453	19498.1	21125.2	21837.8	18043.4	19969.6	5133.61	5242.79	5015.1	5747.04
NEG_3681	9.98	309.173	2-Dodecoxyethyl hydrogen sulfate	[M-H]-	C14H30O5S	Organic acids and derivatives	Organic sulfuric acids and derivatives		0.738	10123.9	7571.99	7755.07	8144.8	7619.5	9290.7	5454.24	5989.3	5930.14	3855.19	2712.11	6178.34	2717.47	1613.04	4108.09	3284.48	6172.95	7677.15	9461.39	7675.18	8669.57	6386	6021.1	5966.16	7221.75	4649.11	7704.16
NEG_5707	10.006	393.176	Triamcinolone	[M-H]-	C21H27FO6	Lipids and lipid-like molecules	Steroids and steroid derivatives		0.751	82708.9	88482.9	120976	89842.5	62405	118566	75236.4	68397.7	81251.7	69019.8	130222	84286.5	65271	109028	77720.8	55948.7	63683.5	144122	127951	128743	153742	58755.9	129622	92816.5	73172.6	76489	74293.3
POS_3518	10.01	318.297	Phytosphingosine	[M+H]+	C18H39NO3	Organic nitrogen compounds	Organonitrogen compounds	C12144	0.858	36379.6	34283.3	39842.2	39106.8	33246.6	36747.4	80369.6	68550.3	74840.8	70699.2	73591.8	76606.4	58521.3	66891.1	46133.3	72816.3	34789.6	115259	111415	95561.3	93711.8	86637.6	108590	62852.4	63422.9	58963.5	63979
NEG_3333	10.017	293.183	Hydron;tetradecyl sulfate	[M-H]-	C14H30O4S	Organic acids and derivatives	Organic sulfuric acids and derivatives		0.875	203879	207490	198593	229660	202775	231414	205305	218670	204793	199064	213780	228181	201917	232705	208344	172880	167860	280684	244883	260957	312376	260584	259809	189679	189757	232403	190237
NEG_10065	10.026	559.317	3-(Hexopyranosyloxy)-2-hydroxypropyl ester, (9Z,12Z,15Z)-9,12,15-octadecatrienoic acid	[M+FA-H]-	C27H46O9	Lipids and lipid-like molecules	Glycerolipids		0.853	40709	49958.2	34487.3	45254.5	49047.5	48390.7	46901.7	72321.6	64205.1	56360.8	67869.7	66591.5	26989.7	28841.7	75170.4	31988.4	17455.5	28882.9	27288	37078.7	39321.2	43350.8	24933.6	41127.6	42581.7	42577.8	42579.4
NEG_10130	10.062	562.322	(2-Hydroxy-3-octadeca-9,12,15-trienoyloxypropyl) 2-(trimethylazaniumyl)ethyl phosphate	[M+HCOO]-	C26H48NO7P	Lipids and lipid-like molecules	Glycerophospholipids		0.916	47823.9	61946.9	41751.1	52222.1	61748.4	57947.2	53098.5	90466.8	72340.6	64494.5	75919	74444.9	73075.7	81204	192142	88545.7	48487.2	41378.3	34372.1	44808.3	53400.4	58832	33003.3	53575.8	53572.4	53575.6	50484
POS_7113	10.083	476.275	[1-[2-Aminoethoxy(hydroxy)phosphoryl]oxy-3-hydroxypropan-2-yl] octadeca-6,9,12-trienoate	[M+H]+	C23H42NO7P	Lipids and lipid-like molecules	Glycerophospholipids		0.744	48612.5	40948.4	54739.8	45149.4	41814.8	44527.4	60024.2	48901	52922	52759.3	53506.9	53923.9	102208	105276	118404	101342	117013	37288.2	38119.1	33780.6	31171.2	30437.8	40034.6	41844.2	41846.2	42842.5	41846.7
POS_3478	10.088	316.283	2-Aminooctadec-8-ene-1,3,4-triol	[M+H]+	C18H37NO3	Organic nitrogen compounds	Organonitrogen compounds		0.787	54635.5	43662.2	48194.7	45786.1	48680.2	49581.5	41505.7	47217	52181	45160.7	50901.8	58932.7	51247.4	57383.5	47522.3	49260.2	45811.7	54922.8	48534	45971.9	50601.9	47804.5	51772	54679.2	46279.8	52714.8	51736.2
NEG_3488	10.139	299.265	Vernolic acid	[M-H]1-	C18H32O3	Lipids and lipid-like molecules	Fatty Acyls	C14826	0.844	223508	161557	224560	223128	208874	225094	246098	251970	249046	246674	253422	142174	115600	145838	122451	115573	222004	248029	214809	241688	271386	206050	251588	231810	223755	255667	227777
POS_2342	10.185	251.045	Diphenyl phosphate	[M+H]+	C12H11O4P	Organic acids and derivatives	Organic phosphoric acids and derivatives		0.769	17209.9	14363.8	18391.2	16499.1	12296.8	16508.5	16170.9	15093.9	17703.1	14057.1	17827.8	20665.6	16731.1	18054.3	19174.2	14375.1	17255.3	18379.1	16696.3	17008	16153.1	10644.4	17893.6	17988.4	16596.6	16576.9	16588.3
POS_591	10.209	137.131	Sabinene	[M+H]+	C10H16	Lipids and lipid-like molecules	Prenol lipids		0.707	7824.75	9334.81	10485.1	9953.49	4633.76	9291.57	18667.3	18723.8	23691.2	18700.4	19418.6	20540	28819.9	24541.2	32969.4	26585.3	31362.1	21772.8	20304.5	17992.4	17419.4	18394.3	18772.4	20275.4	16311.6	16287.5	17168.5
POS_4216	10.226	349.234	Avocadyne 1-acetate	[M+Na]+	C19H34O4	Lipids and lipid-like molecules	Fatty Acyls		0.755	307201	248662	341874	283051	253044	270328	295924	242001	269223	278205	270568	276453	244982	235180	267693	233630	276174	256116	257093	230864	209678	204845	267445	189109	195947	194377	199403
POS_3733	10.274	330.339	Cyclic AMP	[M+H]+	C10H12N5O6P	Nucleosides, nucleotides, and analogues	Purine nucleotides	C00575	0.898	959066	806746	973939	876821	836591	860352	1.34395e+06	1.16918e+06	1.23668e+06	1.34337e+06	1.26224e+06	1.38632e+06	974873	1.18581e+06	599695	1.14955e+06	544510	1.32342e+06	1.11877e+06	1.03765e+06	1.07296e+06	902490	1.18496e+06	1.30678e+06	1.28836e+06	1.2959e+06	1.33071e+06
NEG_4698	10.295	349.208	6,10a-Dihydroxy-4-(hydroxymethyl)-4,7,11b-trimethyl-1,2,3,4a,5,6,6a,7,11,11a-decahydronaphtho[2,1-f][1]benzofuran-9-one	[M-H]-	C20H30O5	Organoheterocyclic compounds	Naphthofurans		0.811	10682.6	9431.33	11276.7	12547.4	8794.11	10447.6	12502	10370	12446.4	13128.9	11449.5	14914.7	18279.6	20553.2	32344.5	19576	16595.6	15527.3	11179.5	11480.8	15572.4	10161.4	15673.7	12572.8	10475.8	13759.6	12258.9
POS_13478	10.304	909.477	(2S,3R,4R,5R,6S)-2-[(2R,3S,4S,5R,6R)-4-hydroxy-2-(hydroxymethyl)-6-[(1R,4S,5'S,6R,7S,8R,9S,13S,16S,18R)-5',7,9,13-tetramethylspiro[5-oxapentacyclo[10.8.0.02,9.04,8.013,18]icosane-6,2'-oxane]-16-yl]oxy-5-[(2S,3R,4S,5S,6R)-3,4,5-trihydroxy-6-(hydroxymethyl)oxan-2-yl]oxyoxan-3-yl]oxy-6-methyloxane-3,4,5-triol	[M+Na]+	C45H74O17	Lipids and lipid-like molecules	Steroids and steroid derivatives		0.787	19584.1	13648.7	19880.4	15373.4	16263.5	15401.7	23667.5	17356	21332	23327.8	21228.3	23551	10333.7	12827.2	10845.6	9907.73	14077.8	22137.4	19678.9	15640.2	16685.8	15129.3	18931.8	16666.3	16673	18120	16680.6
NEG_8680	10.307	504.316	Phosphatidylcholine lyso 18:2	[M-CH3]-	C26H50NO7P	Lipids and lipid-like molecules	Glycerophospholipids		0.78	37681.7	50757.6	33402.3	39478.8	53211.6	44778.6	62562.6	124178	97777	84602.8	93673.1	92838.6	27226.8	29976.2	94749.5	34809.1	19568.2	76536	74163.6	114408	121374	140019	72844.8	72292.4	73993.1	72875.8	71628
POS_7148	10.325	478.29	4-[5-[[4-[5-[Acetyl(hydroxy)amino]pentylamino]-4-oxobutanoyl]-hydroxyamino]pentylamino]-4-oxobutanoic acid	[M+NH4]+	C20H36N4O8	Lipids and lipid-like molecules	Fatty Acyls		0.847	136571	114050	146493	127869	113382	128241	252887	199478	212530	231763	236417	219114	205639	192363	231501	193239	232225	414343	377993	314368	317392	259263	388272	168038	166829	166907	178355
NEG_9981	10.345	555.295	Dronedarone	[M-H]-	C31H44N2O5S	Organic oxygen compounds	Organooxygen compounds		0.825	36983.2	39783.8	35153.4	33140.9	36192	35555.1	176194	242296	242181	223596	242296	244879	27909.7	29265.8	86420.3	30670.8	21535.5	34409.3	26846.2	40843.2	45379.1	45589.7	25047.6	14173	16625.9	12925.6	15408.2
POS_7232	10.407	482.323	1-Pentadecanoyl-sn-glycero-3-phosphocholine	[M+H]+	C23H48NO7P	Lipids and lipid-like molecules	Glycerophospholipids	C04230	0.858	58732.4	41316.5	66115.8	54405.9	49373.8	54622.7	48986.1	46051.3	56410.1	49734.6	52490.9	50121.9	89034.7	68284.1	85357.9	68997.3	78465.4	122403	132321	111703	97524.1	88106.3	133413	49425.2	50330.6	47995.2	54271.4
POS_3096	10.441	295.262	Methyl linoleate	[M+H]+	C19H34O2				0.955	26696.2	23989	52495.5	27588.5	20695	20838.9	599604	602329	649647	636738	654964	634952	1.48032e+06	1.32576e+06	1.53979e+06	1.33102e+06	1.52742e+06	945206	1.02372e+06	853413	801408	707552	1.06437e+06	493421	493421	497684	503300
POS_4442	10.442	356.353	N-(2-Hydroxyethyl)icosanamide	[M+H]+	C22H45NO2	Organic nitrogen compounds	Organonitrogen compounds		0.783	104695	101453	126700	104015	94151.7	102148	90508	117218	115433	109076	123231	101761	156755	133709	64376.5	160637	48177.4	280720	167825	144227	126070	136714	169777	126855	130121	126998	140500
NEG_3476	10.461	299.204	Dehydroabietic acid	[M-H]-		Lipids and lipid-like molecules	Prenol lipids		0.848	83401.6	81138	78102.2	84673	80596.4	83682.4	126923	154848	156369	138486	155076	160164	78507.6	78721.7	135161	76452.2	62735.7	66936.5	59253.5	73855.7	82573.2	77517.8	65361.5	108861	109732	113847	108866
NEG_10187	10.465	564.337	(2-Hydroxy-3-octadeca-9,12-dienoyloxypropyl) 2-(trimethylazaniumyl)ethyl phosphate	[M+HCOO]-	C26H50NO7P	Lipids and lipid-like molecules	Glycerophospholipids		0.847	249681	321545	198000	240855	297038	257976	383056	731092	560860	480989	582928	605462	193885	211169	867149	235015	140763	434308	399202	619743	674914	797511	373993	448448	450512	437446	446291
POS_3418	10.478	313.27	2,4-Dihydroxyheptadecyl acetate	[M-H2O+H]+	C19H38O4	Lipids and lipid-like molecules	Fatty Acyls		0.746	50126.7	43143.1	69760.3	111115	69690.3	38551	144365	104799	149046	132540	122599	128472	133534	134638	151399	132760	161862	401546	461364	339353	349023	307238	489735	143013	143421	135106	143435
NEG_7908	10.485	476.286	[3-[2-Aminoethoxy(hydroxy)phosphoryl]oxy-2-hydroxypropyl] octadeca-9,12-dienoate	[M-H]-	C23H44NO7P	Lipids and lipid-like molecules	Glycerophospholipids		0.891	244392	361444	221747	247637	313019	268659	285379	652810	499942	363744	503191	475871	133008	137731	834409	146068	114023	294601	272115	446169	485223	607760	292185	462346	462353	475398	462357
POS_8631	10.487	539.294	Cucurbitacin D	[M+Na]+		Lipids and lipid-like molecules	Steroids and steroid derivatives		0.762	14202	7146.02	14029.9	12069.5	7071.55	6644.71	13263.4	8311.51	16504	20835.3	14586.4	17175.3	4719.29	12740.9	15093.1	9253	17820	35214.7	40907.4	33592.4	32983.7	17285.2	24159.9	14920.1	10360.9	11526.5	10689.4
NEG_1903	10.495	227.202	Myristic acid	[M-H]-	C14H28O2	Lipids and lipid-like molecules	Fatty Acyls	C06424	0.861	142453	151640	132541	155197	139268	154144	50562.5	70668.6	64565.8	55629.4	65267.1	56345.4	28008.1	31137.2	53373.3	37355.7	27669.3	82008.4	85786.7	118679	113323	119446	81437.6	95864.2	111742	108338	111437
POS_3240	10.497	303.25	2-Monomyristin	[M+H]+	C17H34O4	Lipids and lipid-like molecules	Glycerolipids		0.814	4.21232e+06	3.11108e+06	4.38376e+06	3.67717e+06	3.37129e+06	3.93752e+06	804482	705180	742723	802992	645560	726512	431184	433305	462884	404688	490565	2.43104e+06	2.58545e+06	2.18351e+06	1.7653e+06	1.84689e+06	2.61781e+06	1.41238e+06	1.4002e+06	1.41291e+06	1.37618e+06
POS_11102	10.497	676.413	Enniatin B1	[M+Na]+	C34H59N3O9	Organic acids and derivatives	Peptidomimetics		0.748	612.074	4915.67	3143.47	5083.08	568.789	796.039	5075.95	1562.16	2052.19	1338.58	2743.13	2573.92	359.774	1959.33	3371.37	3190.98	5115.01	64273.8	72001.3	57610.9	55887.9	55966.7	70946	5591.94	3476.92	6248.29	5313.68
NEG_2693	10.5	271.233	FA 16:0;2O	[M-H]-	C16H32O3	Lipids and lipid-like molecules	Fatty Acyls		0.72	219908	263786	194645	247818	257063	260594	179051	274674	249477	210128	243550	254088	177808	188589	332738	187580	124730	154000	129254	174228	200591	188901	146786	201989	202071	229593	202296
POS_3378	10.53	311.256	Avocadene 2-acetate	[M-H2O+H]+	C19H36O4	Lipids and lipid-like molecules	Fatty Acyls		0.819	160687	108892	198071	140884	131025	137540	77090	42850.9	341704	78457.6	300107	319057	175453	221424	243229	208901	310744	36135.6	543261	42452.4	41769.4	33630	57698.3	70757.3	74161.6	71562	67993.6
NEG_10119	10.554	561.33	[2-Hydroxy-3-[3,4,5-trihydroxy-6-(hydroxymethyl)oxan-2-yl]oxypropyl] octadeca-9,12-dienoate	[M+HCOO]-	C27H48O9	Lipids and lipid-like molecules	Glycerolipids		0.704	6591.82	8620.18	6201.44	6394.3	8019.2	7285.2	7651.15	15687.5	12410.6	9837.44	12678.4	12801.2	2276.37	2602.42	9666.92	2712.04	2615.9	20464.4	20379.1	31075.5	33370.6	39859.4	20831.2	14876.2	14747.8	16877.3	14752.4
POS_12053	10.58	745.41	Naadp	[M]+	C21H28N6O18P3	Nucleosides, nucleotides, and analogues	(5'->5')-dinucleotides		0.794	8887.7	8588.24	10423.1	9765.57	8152.53	8414.09	15325.9	12718.2	16776.7	14524.5	14372.7	17037.3	8675.53	9342.27	9106.56	9071.49	9774.26	33839.7	37007.1	28698.6	28469.5	30146.7	34659.2	9973.51	10606.1	9927.54	10114.7
POS_6854	10.605	465.282	4-[3-Methyl-5-(5,6,7-trihydroxy-1,2,4a,5-tetramethyl-3,4,6,7,8,8a-hexahydro-2H-naphthalen-1-yl)pentoxy]-4-oxobutanoic acid	[M+Na]+	C24H42O7	Lipids and lipid-like molecules	Prenol lipids		0.774	45495.2	37811.1	51142.7	20757.8	38631.5	39863.1	42979.4	71634.3	84016.2	82929	45763.6	44130.1	88502.2	98545.4	92729.6	102903	100018	158268	171054	137240	135139	140036	161081	81414.8	82000.4	84351.6	81420.3
POS_10544	10.616	637.307	Thalsimine	[M+H]+	C38H40N2O7	Phenylpropanoids and polyketides	Tannins		0.714	65521	47351.1	81691.6	51028.7	47658.9	49526.5	201665	190347	203050	199037	181794	179487	67439.3	78013.7	77217.7	67765.6	95657.1	60956.5	68120.6	47280.5	46694.5	49312.8	68964.4	79417.5	79414.7	79183.6	76834.6
NEG_2369	10.659	253.22	9-Hexadecenoic acid	[M-H]-	C16H30O2	Lipids and lipid-like molecules	Fatty Acyls		0.858	43881.7	52888.2	36379.3	46964.8	47260.9	50453.8	23819.5	45705.4	39593	27314.9	38868.8	33600.7	9455.99	8920.04	24159.4	8157.94	8695.2	19020.5	21694	31668.9	29739.8	35034.7	21089.9	31587.3	38499.7	37003.1	38318.6
POS_10737	10.665	651.215	(15S,16Z,17S)-16-ethylidene-4-hydroxy-15-[(2S,3R,4S,5S,6R)-3,4,5-trihydroxy-6-(hydroxymethyl)oxan-2-yl]oxy-2,10,14,20-tetraoxatetracyclo[21.2.2.13,7.012,17]octacosa-1(25),3,5,7(28),12,23,26-heptaene-11,19-dione	[M+Na]+	C32H36O13	Phenylpropanoids and polyketides	Macrolides and analogues		0.732	75295.2	21995.9	29973.6	37085.8	17635.8	20923	14106.2	12974.1	21799.5	30595.2	18784.5	27829.7	10676.4	10663.5	7107.75	8374.38	10918.6	4746.84	5276.73	5581.21	7657.38	6887.02	6526.87	20770.3	11591.9	36694.1	18143.8
POS_3444	10.688	314.306	N-(2-Hydroxyethyl)heptadecanamide	[M+H]+	C19H39NO2	Organic nitrogen compounds	Organonitrogen compounds		0.805	176650	100820	109973	147993	164783	151207	127792	162743	175273	90064	162545	97427.1	135117	87666.8	118539	78629	166675	98484.5	131772	123157	93365.6	134982	157564	171386	164088	166429	163995
NEG_3428	10.721	297.246	9,10-Epoxystearic acid	[M-H]-	C18H34O3	Lipids and lipid-like molecules	Fatty Acyls	C19620	0.74	115380	103307	100173	148810	146242	143859	76991.4	85435.2	68992	59234.9	78835.6	72752.1	60610.3	51995.8	98228.9	65245	72710.3	138427	129376	201172	232307	246817	133660	81754.1	55379.6	84907.5	78138.8
NEG_8753	10.747	506.329	Phosphatidylcholine lyso 18:1	[M-CH3]-	C26H52NO7P	Lipids and lipid-like molecules	Glycerophospholipids		0.804	4379.36	4451.92	3902.95	4333.64	4073.01	4572.51	7458.48	11504.5	12830	8854.48	12768.4	10163.4	5153.35	4679.94	32669.9	6136.87	4952.18	37771.3	39093.3	64492.2	67429.5	81787.2	38517.4	29483	29196.5	27909.8	29484.3
NEG_3537	10.748	301.22	Abietic acid	[M-H]-	C20H30O2	Lipids and lipid-like molecules	Prenol lipids	C06087	0.811	5713.76	7804.05	9151.05	10197.6	8440.94	9348.48	11675.5	14266.2	14238	13004.9	14526.1	15559.5	8087.82	8919.04	15946.8	7418.53	7916.77	10325.8	9464.43	10094.6	12487.2	10223.4	12572.3	31518.2	31128	31893.2	31436.9
NEG_9630	10.767	540.337	1-Palmitoylphosphatidylcholine	[M+HCOO]-	C24H50NO7P	Lipids and lipid-like molecules	Glycerophospholipids		0.896	932577	903542	820376	811465	794962	721003	729002	1.45387e+06	1.08765e+06	871664	1.13123e+06	1.02017e+06	521809	489018	2.91847e+06	515049	412709	2.1668e+06	2.08921e+06	3.0693e+06	3.49564e+06	4.63693e+06	2.33321e+06	2.55262e+06	2.80183e+06	2.49727e+06	2.58438e+06
POS_8072	10.768	518.319	(2-Hydroxy-3-octadeca-6,9,12-trienoyloxypropyl) 2-(trimethylazaniumyl)ethyl phosphate	[M+H]+	C26H48NO7P	Lipids and lipid-like molecules	Glycerophospholipids		0.735	2.50672e+06	2.26749e+06	2.63194e+06	2.45182e+06	2.536e+06	2.18731e+06	2.5993e+06	2.20626e+06	2.52293e+06	2.10747e+06	2.31415e+06	2.22844e+06	2.76035e+06	3.01024e+06	2.58922e+06	2.48168e+06	2.7595e+06	5.67656e+06	6.07683e+06	5.27151e+06	6.02194e+06	4.75582e+06	7.33909e+06	2.79314e+06	2.54628e+06	2.89153e+06	2.75875e+06
POS_4843	10.769	372.309	Tetradecanoylcarnitine	[M+H]+	C21H41NO4	Lipids and lipid-like molecules	Fatty Acyls		0.75	1.40875e+06	1.34428e+06	1.4676e+06	1.389e+06	1.33627e+06	1.18092e+06	2.20789e+06	2.03481e+06	2.31406e+06	2.0378e+06	2.38642e+06	2.17998e+06	2.55941e+06	2.80366e+06	2.61702e+06	1.78004e+06	2.28684e+06	2.17088e+06	2.0976e+06	1.80859e+06	2.38125e+06	1.64e+06	2.87581e+06	1.84585e+06	1.72573e+06	1.80545e+06	1.83684e+06
POS_3923	10.772	337.272	12,19,20-Trihydroxy-14-methylenegeranylnerol	[M+H-H2O]+	C21H38O4				0.73	1.39736e+07	1.28744e+07	1.36526e+07	1.42262e+07	1.31357e+07	1.15524e+07	2.13238e+07	1.71965e+07	2.18059e+07	1.72484e+07	2.02335e+07	1.84499e+07	2.28882e+07	2.71317e+07	2.2373e+07	1.99483e+07	2.47334e+07	1.72751e+07	1.84414e+07	1.70186e+07	1.88876e+07	1.7146e+07	2.21383e+07	1.6369e+07	1.40518e+07	1.63692e+07	1.61037e+07
NEG_8032	10.772	480.313	Phosphatidylcholine lyso 16:0	[M-CH3]-	C24H50NO7P	Lipids and lipid-like molecules	Glycerophospholipids		0.743	196437	211896	178112	180460	157278	157347	163159	350342	246249	197800	265846	234151	112942	104751	805493	124728	93085.1	488111	487666	727047	825518	1.22521e+06	519550	624355	707122	624823	631199
POS_4414	10.773	355.284	[4,6-diethyl-6-(4-ethyl-2-methyloctyl)-3H-1,2-dioxin-3-yl]acetic acid	[M+H]+	C21H38O4				0.78	1.93422e+07	1.77603e+07	2.06203e+07	2.01739e+07	1.92678e+07	1.48669e+07	2.82761e+07	2.58862e+07	3.02032e+07	2.49159e+07	2.91823e+07	2.95549e+07	3.17504e+07	3.45869e+07	3.2519e+07	2.64846e+07	3.53718e+07	2.71329e+07	2.79844e+07	2.57707e+07	3.01027e+07	2.32857e+07	3.57947e+07	2.36039e+07	2.05347e+07	2.36126e+07	2.35565e+07
POS_6651	10.776	454.288	1-Hexadecanoyl-sn-glycero-3-phosphoethanolamine	[M+H]+	C21H44NO7P	Lipids and lipid-like molecules	Glycerophospholipids		0.863	722129	684839	732092	694822	705519	613555	1.45363e+06	1.2419e+06	1.51184e+06	1.23675e+06	1.39656e+06	1.29358e+06	1.43292e+06	1.53313e+06	1.21721e+06	1.25687e+06	1.14637e+06	2.608e+06	2.65137e+06	2.34516e+06	2.82677e+06	2.13762e+06	3.07691e+06	1.20882e+06	1.02271e+06	1.20845e+06	1.19947e+06
NEG_7227	10.776	452.283	2-Azaniumylethyl (3-hexadecanoyloxy-2-hydroxypropyl) phosphate	[M-H]-	C21H44NO7P	Lipids and lipid-like molecules	Glycerophospholipids		0.89	524911	637894	424023	449878	486781	404064	701256	2.11023e+06	1.19672e+06	819598	1.14157e+06	1.10047e+06	395295	371817	6.42019e+06	384766	321378	1.3965e+06	1.40747e+06	2.12432e+06	2.47985e+06	3.90645e+06	1.65633e+06	2.96096e+06	3.41135e+06	3.411e+06	3.33574e+06
POS_2923	10.777	285.2	Koninginin A	[M+H]+	C16H28O4	Organoheterocyclic compounds	Oxepanes		0.725	21252	21497.1	15573.2	18733.7	42369.4	17074.6	25673.4	35187.6	23705.4	27417.8	31384.1	30182.1	37397.9	43055.3	32081	29681.2	36544	20925.8	25849.5	20217	32510.6	25677.6	34589.9	21619.7	21650.8	25674.2	22521.2
NEG_4075	10.781	325.187	Dodecylbenzenesulfonic acid	[M-H]-	C18H30O3S	Benzenoids	Benzene and substituted derivatives		0.712	53006.2	65386.7	48862.6	57064.7	67199.5	57969	58171	64787.6	77662.8	54497.9	60462.9	63964.3	39916.8	34384.2	97037.4	48056.1	96257.2	31121.8	41566.2	41511.7	49988.3	52628.7	34099.9	53669.8	56570	55615.6	56702.9
NEG_3484	10.803	299.261	(R)-2-Hydroxystearic acid	[M-H]-	C18H36O3				0.751	80028.3	63952.4	70137.4	76647.5	66021	65179.7	74054.2	54132.5	55316.4	81062.3	45563	59879.7	62399.1	57538.9	65298.8	46635.7	65077.4	77416.1	73875.7	66385.1	81427.1	43723.5	73016.7	67758.8	63411.3	61026.9	65345.1
POS_5382	10.809	397.291	Radiclonic acid	[M+H]+	C23H40O5	Lipids and lipid-like molecules	Prenol lipids		0.719	34538.8	35601.7	31354.4	32283.5	35404.7	30751.1	29739.6	24562.6	22140.5	20550.4	28552.9	25887.5	27847.1	25918.2	23425.3	18984.2	24325.6	34400.6	33394.3	29284.9	38792.8	25185	39437.5	26271.6	20657.6	23662.1	22912.7
POS_3556	10.836	321.245	6-Oxocativic acid	[M+H]+	C20H32O3	Lipids and lipid-like molecules	Prenol lipids		0.764	144532	70154.3	95855.4	98421.8	67271.6	81043.3	34794.1	25947.9	38341.1	47753.9	34034.1	44434	53627.3	47564.2	62038.2	55868.4	43430.1	73048.5	36028.9	39832.2	67901.4	45517.8	34278.8	58758.1	50934.7	49003.5	53666.9
POS_3053	10.842	293.244	3alpha,17beta-Dihydroxy-5alpha-androstane	[M+H]+	C19H32O2	Lipids and lipid-like molecules	Steroids and steroid derivatives		0.819	18832.5	33481.7	24568.9	31052.8	23034.2	32229.1	9923.37	8643.38	13781.9	10239.3	10335.2	13471.6	17971.7	18391.7	22358.7	20679.5	25295.6	13448.8	12884.4	9924.7	11941.9	8797.42	14425.9	16037.6	16476.3	15918.4	15793.9
POS_1222	10.872	181.158	12-Hydroxydodecanoic acid	[M-2H2O+H]+	C12H24O3	Organic acids and derivatives	Hydroxy acids and derivatives	C08317	0.733	49661.4	45296.7	57290	50569.8	46546.8	44009.3	132564	100466	115629	108160	100993	97593.3	150998	142316	156496	136222	142655	115636	124048	102978	98654.5	93506.8	107561	81033.5	86681.4	75420.9	82100.5
POS_3157	10.875	299.221	Nephrosteranic acid	[M+H]+	C17H30O4	Organoheterocyclic compounds	Lactones		0.717	37397	31597	40413.3	31465.6	30152	28603.9	78445.2	66127.1	76450.9	74955	72200.9	75932.4	99635.3	98603	93550.2	88027.1	96735.5	77812.7	78962.2	75321.8	64576.5	64274.2	70876.9	54228.7	57036.2	54221.5	57026.2
POS_821	10.875	155.141	Nerol	[M+H]+	C10H18O	Lipids and lipid-like molecules	Prenol lipids	C09871	0.753	106296	112409	130257	112000	95667.2	103693	352629	266635	292365	245721	264677	253718	418693	401533	435173	351956	399108	312162	318834	254161	283618	214613	294479	211141	220566	220529	218185
NEG_2863	10.875	279.235	Linoleic acid	[M-H]-	C18H32O2	Lipids and lipid-like molecules	Fatty Acyls	C01595	0.897	477110	645935	624754	546362	690157	571843	957212	1.96384e+06	1.36344e+06	1.0217e+06	1.78103e+06	1.02777e+06	932174	698765	3.3245e+06	629921	1.00392e+06	888244	1.11092e+06	1.22069e+06	1.13576e+06	1.80998e+06	1.0814e+06	1.57586e+06	2.26054e+06	1.8297e+06	1.85776e+06
NEG_10269	10.876	566.352	(2-Hydroxy-3-octadec-9-enoyloxypropyl) 2-(trimethylazaniumyl)ethyl phosphate	[M+HCOO]-	C26H52NO7P	Lipids and lipid-like molecules	Glycerophospholipids		0.853	40007.1	60275.8	38254.9	44047.2	61688.7	43884.6	49793.8	106782	73638.6	54089	76180.1	66929.1	33594	34020.5	230595	30555	29789.4	223952	232488	265070	301376	447943	239974	187758	267493	186581	198655
POS_4945	10.878	377.267	3-[(Acetyloxy)methyl]-5-[(1R,4aR,8aR)-decahydro-5,5,8a-trimethyl-2-methylene-1-naphthalenyl]-, methyl ester, (2Z)-2-pentenoic acid	[M+H]+	C23H36O4	Lipids and lipid-like molecules	Prenol lipids		0.758	6.20081e+07	6.23991e+07	6.17942e+07	6.01699e+07	5.84937e+07	5.2385e+07	1.07743e+08	9.89793e+07	1.0007e+08	8.9949e+07	9.80437e+07	1.01543e+08	1.45157e+08	1.27741e+08	1.3525e+08	1.16435e+08	1.20006e+08	1.03665e+08	1.01586e+08	8.89261e+07	1.3568e+08	8.00626e+07	8.92062e+07	8.22467e+07	8.29763e+07	8.26125e+07	8.41785e+07
NEG_7964	10.883	478.3	2-Azaniumylethyl (2-hydroxy-3-octadec-9-enoyloxypropyl) phosphate	[M-H]-	C23H46NO7P	Lipids and lipid-like molecules	Glycerophospholipids		0.903	21242	42629.9	23308.1	21135.5	33389.7	21402.1	26951.9	110554	50867.2	32387.9	68516.8	43150.8	15765.9	15838.6	461155	14778	16375.9	57708	69968.3	91714.1	104793	207366	88232	165910	197184	177033	169625
NEG_14359	10.925	793.432	1-O-[(3beta,5xi,9xi,18xi)-3-(beta-D-Glucopyranuronosyloxy)-28-oxoolean-12-en-28-yl]-beta-D-glucopyranose	[M-H]-	C42H66O14	Lipids and lipid-like molecules	Prenol lipids		0.778	607.643	1376.32	999.626	1109.22	1237.32	453.728	1376.23	2504.28	2083.22	2103.52	2220.08	1804.78	838.427	1083.33	2986.96	425.332	1081.68	1542.31	2504.14	1896.86	2171.74	3817.22	1417.43	3023.99	3194.61	3335.55	2324.77
POS_2430	10.964	256.263	Palmitic amide	[M+H]+	C16H33NO				0.738	1.08039e+06	684920	991390	832852	767736	770283	1.14763e+06	878405	874887	855794	968827	1.0436e+06	919956	899444	902555	743923	756461	2.61027e+06	2.13475e+06	2.1903e+06	1.91056e+06	1.64685e+06	1.89865e+06	1.42082e+06	1.38306e+06	1.34581e+06	1.42196e+06
POS_11501	10.969	706.461	Solanidine base + O-Hex-dHex	[M+H]+	C39H63NO10	Lipids and lipid-like molecules	Steroids and steroid derivatives		0.805	17558.7	12161	17897.1	15946.9	11383.9	15067.5	36412	28171	25952.8	22610	33717.7	26955	33026.8	27781.6	32063.2	20138.6	29585.3	360091	347989	349122	245401	490376	285314	59590.8	42138.6	59615.5	58275.4
NEG_15390	10.974	887.515	Cy 3-coumSamb-5-Glc	[M-H]-	C41H45O22	Phenylpropanoids and polyketides	Flavonoids		0.739	1147.71	1381.15	863.722	1031.17	1155.82	866.494	1880.1	2190.57	2858.28	1934.39	2742.64	1639.53	907.356	934.159	2514.33	975.327	489.197	2561.31	4112.05	6950.91	7348.94	11158.3	4411.91	2069.68	2223.93	2730.77	1562.57
POS_6917	10.991	467.3	Cephaeline	[M+H]+	C28H38N2O4	Alkaloids and derivatives	Emetine alkaloids		0.736	16569.5	13778.2	17331.8	16308.8	8716.85	10166.5	9313.5	22692.7	19294.5	20017.1	13669.5	11027.9	19503.1	17291.6	14416.7	25121.7	17015.5	58601.4	61899.1	68452.8	46096.6	74349.2	68695.7	25655.6	29462	21992.2	30738.5
POS_11705	10.997	722.443	beta-Solanine	[M+H]+	C39H63NO11	Lipids and lipid-like molecules	Steroids and steroid derivatives		0.781	17477.5	13488.3	15259.4	20397.7	10782.6	15384.8	20304.9	15547.5	13737.8	22633.3	12611	16988.4	16052.8	12822.9	21157.4	17429.9	22598.7	84588.2	82026.5	34357.3	54542.6	63370.2	44653.4	27044.7	20979.8	26783	21491.5
POS_6046	11.042	427.3	Acetyl-Leu-Leu-Arg-al	[M+H]+	C20H38N6O4	Organic acids and derivatives	Carboxylic acids and derivatives		0.887	274689	191800	291284	222595	229299	222693	221287	238098	234393	230368	239502	262922	264187	300106	256694	264363	262035	227554	220636	229911	209013	212254	266277	187579	206193	188818	196673
POS_7916	11.062	510.354	1-Heptadecanoyl-sn-glycero-3-phosphocholine	[M+H]+	C25H52NO7P	Lipids and lipid-like molecules	Glycerophospholipids	C04230	0.848	80619.5	42051.3	66269	58007.5	53485.8	63849.3	83845.4	88314.4	90229	72630.9	89247.4	88398.3	121886	137615	127276	120025	120189	176808	177330	177970	160055	148505	208435	86254.2	89680.3	59781.6	89617.1
NEG_3563	11.08	303.238	Arachidonic acid	[M-H]-	C20H32O2	Lipids and lipid-like molecules	Fatty Acyls	C00219	0.731	2464.85	3277	2109.97	2475.46	3723.22	2135.07	4589.71	10038.2	8570.24	5226.65	7992.2	5905.74	11476.5	10953.8	43626.4	10916.7	7506.78	1403.55	2122.57	2074.68	2075.87	1980.83	2210.56	9110.46	7156.91	9232.94	8861.87
POS_3252	11.093	304.26	Fenpropimorph	[M+H]+	C20H33NO	Benzenoids	Benzene and substituted derivatives		0.783	242163	206986	231234	232011	214474	218766	345153	345716	368720	333267	354492	365487	235814	250103	203743	234539	266120	1.29193e+06	1.38171e+06	1.33475e+06	1.36927e+06	1.10696e+06	1.54954e+06	1.01688e+06	1.04079e+06	974910	1.02393e+06
POS_3238	11.107	303.228	Methyltestosterone	[M+H]+	C20H30O2	Lipids and lipid-like molecules	Steroids and steroid derivatives	C07198	0.701	213575	192704	187402	183777	207001	182595	596736	607750	631484	594175	577847	580812	732433	888128	893440	719160	1.04777e+06	501549	427967	423356	470282	324907	473424	403356	421444	408614	425657
NEG_2158	11.115	241.22	Pentadecanoic acid	[M-H]-	C15H30O2	Lipids and lipid-like molecules	Fatty Acyls	C16537	0.835	187611	239355	225197	221696	219776	190200	99689.3	161653	118621	148493	122986	162892	99020.6	134687	106752	142035	100080	166394	173449	143349	169793	106621	152772	159735	166540	171680	163701
NEG_3688	11.116	309.208	12-Hydroperoxyoctadeca-9,13,15-trienoic acid	[M-H]-	C18H30O4	Lipids and lipid-like molecules	Fatty Acyls		0.748	9742.87	19660.7	4503.35	12415.1	6621.34	13586.4	10166.9	26436.9	29077	18520.2	30705.9	25594.2	9811.51	9772.44	43529.4	14546.8	10098.1	9517.05	17895.6	5139.24	7766.04	15540.1	10108.1	19987.4	19992.4	20018.5	21922.4
POS_3623	11.124	325.195	Quinidine	[M+H]+	C20H24N2O2	Alkaloids and derivatives	Cinchona alkaloids		0.842	16084.8	97885.5	21090.7	28791.3	30615.7	49327.7	27700	230864	31164.4	185726	31347	63947.8	55625.7	124430	27261	131302	67695.9	33051.1	34057.7	43819.7	62276.8	55207.7	66341.7	75821.9	54448.7	157502	54671.8
NEG_4093	11.133	325.241	Dihidroprotolichesterinic acid	[M-H]-	C19H34O4	Organoheterocyclic compounds	Lactones		0.827	66689.2	109917	60206.4	67904.1	95585.2	95244.3	136312	282497	185852	158041	223315	182007	110647	111604	321779	148454	72829	62289.5	58504.5	74395.9	81398.2	107286	76387.3	161812	167704	173991	160140
NEG_2779	11.133	277.217	Linolenic acid	[M-H]-	C18H30O2	Lipids and lipid-like molecules	Fatty Acyls	C06427	0.745	117933	109746	71933.3	155159	172447	112333	95327.5	177992	160447	134102	194574	178145	115817	132360	200932	148834	40831.5	60118.2	71786.6	97790	94079	138697	41478.5	114658	114941	116399	122742
NEG_5352	11.135	379.157	8-Desoxygartanin	[M-H]-	C23H24O5				0.759	151930	116018	158958	125806	124029	124759	231483	206416	215407	191705	224027	225714	148260	149935	110445	148883	205980	193974	177962	148124	149821	135180	215353	188429	188428	180117	159479
NEG_4840	11.139	355.326	2-Hydroxydocosanoic acid	[M-H]-	C22H44O3	Lipids and lipid-like molecules	Fatty Acyls		0.787	20735.5	40075.1	25032	18617.8	43319.5	26658.5	27020.2	29719.4	42597.2	23509.2	34702	42165.7	23207.9	24692	51146.6	38974.6	20794.5	20111	33565.7	25824	23542.5	42209.2	26253.3	42409.2	42408.8	43198.9	44018
NEG_2955	11.139	281.244	trans-Vaccenic acid	[M-H]-	C18H34O2	Lipids and lipid-like molecules	Fatty Acyls	C08367	0.824	2.51834e+06	3.45641e+06	2.52256e+06	2.59642e+06	3.31551e+06	2.69882e+06	5.0459e+06	7.28809e+06	6.33934e+06	5.45493e+06	8.2257e+06	6.32168e+06	3.79473e+06	3.50668e+06	1.21668e+07	3.9836e+06	2.48002e+06	2.5049e+06	3.18612e+06	2.64237e+06	2.59831e+06	3.28256e+06	3.00078e+06	5.62906e+06	6.52469e+06	5.81138e+06	5.61762e+06
NEG_3745	11.14	311.17	5-(4-Sulfophenyl)undecane	[M-H]-	C17H28O3S	Benzenoids	Benzene and substituted derivatives		0.809	130646	139137	103348	125874	135879	151810	186844	263666	268835	199154	271123	236524	148924	142261	402927	163326	109909	95425.3	108804	146292	114667	157846	127174	226653	241564	164298	234798
NEG_5144	11.15	369.308	FA 22:1;2O	[M-H]-	C22H42O4	Lipids and lipid-like molecules	Fatty Acyls		0.866	20511.6	7522.73	13430.7	7285.57	13719.6	10350.6	19095.3	25578.2	24996.8	13808.2	21293.4	34608.6	5685.22	2807.99	51131.4	9278.45	2682.4	7997	7189.02	6912.47	5876.66	12117.2	7001.48	21520	19472.2	35447.5	15082.4
POS_4730	11.155	369.236	Perindopril	[M+H]+	C19H32N2O5	Organic acids and derivatives	Carboxylic acids and derivatives	C07706	0.712	600545	511234	610865	622554	593805	496881	708273	686860	636603	735423	755397	606862	663975	667408	641182	652065	775829	543034	580665	573114	698199	508469	620417	589797	583069	632427	571255
POS_3773	11.156	331.284	2-Palmitoylglycerol	[M+H]+	C19H38O4	Lipids and lipid-like molecules	Glycerolipids		0.838	6.65692e+07	4.57845e+07	6.3813e+07	6.03798e+07	5.27243e+07	5.15084e+07	5.73233e+07	4.80212e+07	4.92449e+07	5.64261e+07	6.33942e+07	5.08191e+07	5.0434e+07	5.18277e+07	4.743e+07	4.74379e+07	5.39603e+07	5.59817e+07	6.09931e+07	5.67049e+07	6.30597e+07	4.86035e+07	6.61333e+07	5.02933e+07	4.68727e+07	5.04594e+07	4.59815e+07
POS_4200	11.157	348.308	Glyceryl palmitate	[M+NH4]+	C19H38O4	Lipids and lipid-like molecules	Glycerolipids		0.9	6.21933e+06	4.14273e+06	5.90232e+06	5.42278e+06	4.69612e+06	4.8221e+06	5.32116e+06	4.23727e+06	4.4403e+06	5.2047e+06	5.56831e+06	4.54253e+06	4.45931e+06	4.55445e+06	4.18075e+06	4.30978e+06	4.73035e+06	5.03936e+06	5.54686e+06	5.16134e+06	5.73964e+06	4.44903e+06	6.0142e+06	4.47888e+06	4.17147e+06	4.58034e+06	4.09424e+06
POS_4462	11.158	357.299	Glyceryl monooleate	[M+H]+	C21H40O4	Lipids and lipid-like molecules	Glycerolipids		0.933	2.7004e+06	2.39081e+06	2.28716e+06	1.94845e+06	605174	586118	2.69324e+06	2.79145e+06	2.95852e+06	3.0683e+06	2.43658e+07	3.06852e+06	2.24454e+07	2.91575e+06	957326	2.87948e+06	2.86651e+06	7.7142e+06	7.36381e+06	7.38273e+06	8.0243e+06	2.75071e+06	7.35401e+06	2.1401e+06	3.36668e+06	1.94325e+06	2.35313e+06
POS_12028	11.17	743.436	gamma-Aminobutyrate	[M+H-H2O]+	C4H9NO2	Organic acids and derivatives	Carboxylic acids and derivatives		0.751	22589.4	12704.5	18597	17507.5	11067.7	15908.9	50957.5	45466.1	63981.7	58653.4	62894.9	61915.4	48945.5	57689.1	52508	55179.6	55081.4	49522.6	45299.9	34958	35059.3	29484.4	53039.7	34313.2	34003.7	34313.3	34313
NEG_7274	11.181	453.34	Ursonic acid	[M-H]-	C30H46O3				0.77	5905.68	13146.2	4329.75	4696.26	6207.12	6457.67	1658.39	2059.9	3263.92	2676.8	2907.3	2408.6	1282.67	1632.88	6834.71	1933.47	1684.13	3719.46	3156.79	3486.98	4013.92	15482.7	563.786	5969.05	8133.78	10610.5	6795.73
NEG_2404	11.184	255.234	Palmitic acid	[M-H]-	C16H32O2	Lipids and lipid-like molecules	Fatty Acyls	C00249	0.873	215407	181143	250841	218697	91624.1	210979	85726.1	92746.7	47852.8	53001.4	25389.3	54374.1	83435.5	65514.8	106578	79636.6	143930	187157	242618	194058	206424	346677	212754	137568	155407	192852	142003
POS_3624	11.193	325.207	(1S,4S,9S,10R,13R)-5,9-Dimethyl-14-methylidenetetracyclo[11.2.1.01,10.04,9]hexadecane-5-carboxylic acid	[M+Na]+	C20H30O2	Lipids and lipid-like molecules	Prenol lipids		0.718	229103	233029	249468	243012	264651	292332	378238	406370	379101	515014	515849	408106	446689	490408	422905	438403	485726	257327	292254	278096	354640	281325	327632	416121	378887	397009	375757
POS_8249	11.198	524.363	1-Stearoyl-sn-glycero-3-phosphocholine	[M+H]+	C26H54NO7P	Lipids and lipid-like molecules	Glycerophospholipids	C04230	0.8	58455.7	54246.6	60402.7	43632.5	35859.1	50347.7	63210	34257.3	38508	49169.6	44485.6	36866.5	66133.4	51895.6	63817	57074.6	64068	13455	18836.5	11437.5	12847.3	13784.7	14353.2	23280.2	27315.6	24206.8	23226.2
NEG_6018	11.207	405.275	3-Dehydrocholic acid	[M-H]-	C24H38O5	Lipids and lipid-like molecules	Steroids and steroid derivatives		0.73	18816.4	13490.8	14554.2	12629.5	14440.7	15782.8	16890.1	9868.6	19271.3	22177.3	16422.3	19046.4	15906.7	11939	18610.9	12444.9	15818.8	18029.4	14501.3	19281.3	18046.7	16361.5	18644.3	12335.2	18754.3	15610.6	20871.1
NEG_14814	11.212	825.473	Saikosaponin b2	[M+FA-H]-	C42H68O13				0.732	430.891	123.188	579.66	238.626	208.952	99.2779	544.424	510.098	353.354	206.721	442.094	421.377	336.287	216.845	508.387	377.034	281.829	1340.97	1029.19	2350.6	2230.98	2911.01	2003.23	915.936	956.743	957.111	691.872
NEG_4457	11.213	339.188	Canrenone	[M-H]-	C22H28O3	Lipids and lipid-like molecules	Steroids and steroid derivatives		0.704	322684	327877	273155	341986	304614	368926	363669	597105	390425	266432	500595	508165	447903	436262	367501	346560	372722	340323	340333	319135	363462	378293	411424	488802	624684	299216	520052
NEG_4313	11.236	333.206	1,10a-Dihydroxy-4,4,7,11b-tetramethyl-2,3,4,4a,5,6,6a,7,10a,11,11a,11b-dodecahydrophenanthro[3,2-b]furan-9(1H)-one	[M-H]-	C20H30O4	Organoheterocyclic compounds	Naphthofurans		0.782	26141.1	20453.9	31316.4	26560.3	18321	29059.9	22470.1	16724.9	22148.8	19994.3	34605.5	22597.9	23700.5	20155.3	23324.5	18526.5	27098.8	32905.5	36718.9	32419.1	28778.4	29732.3	26374.9	26724.8	22906.7	31760.2	24862.9
POS_2897	11.244	283.261	Oleic acid	[M+H]+	C18H34O2	Lipids and lipid-like molecules	Fatty Acyls	C00712	0.864	379853	370409	373564	410998	402855	386026	507059	482287	602987	660125	723133	610399	746892	825504	643148	694664	654104	1.03116e+06	1.03429e+06	979098	1.16043e+06	1.05471e+06	1.15878e+06	617540	573954	641374	609520
POS_2227	11.299	242.283	Dioctylamine	[M+H]+	C16H35N	Organic nitrogen compounds	Organonitrogen compounds		0.735	78338.8	92307.4	47797.3	88200.4	104935	67378.5	56302	68609.5	117440	50134.6	80009.7	53292.4	73495.1	101538	65190.6	69256.3	56498.4	103242	84650.2	124087	82703.4	114097	60865.9	62734	58170.5	57098.7	79094.4
POS_33	11.311	73.0635	Butyraldehyde	[M+H]+	C4H8O	Organic oxygen compounds	Organooxygen compounds	C01412	0.77	305343	692558	481085	576546	596251	350994	301541	570220	533239	629020	618275	539537	577304	613599	478629	552434	509134	319739	514431	383405	549815	624382	505613	602051	542200	625683	593011
NEG_1180	11.328	183.007	2,4-Dinitrophenol	[M-H]-	C6H4N2O5	Benzenoids	Phenols		0.888	28276.9	16918.3	16454.3	25662.2	12361.4	27429.4	17418.5	13494.5	4851.11	26344.2	25514.5	21579.8	10636.2	29507.6	19957.9	24028	15779.7	19791.9	10860.7	22813.3	22084.2	31838.8	20720.3	17965.5	17992.9	18552.8	18542.7
NEG_4282	11.335	331.263	Adrenic acid	[M-H]-	C22H36O2	Lipids and lipid-like molecules	Fatty Acyls	C16527	0.736	9739.72	4578.64	7766	11101.4	5723.13	8234.82	7402.56	6526.63	7258.61	7738.24	8171.66	7911.86	8272.27	7642.56	5781.16	5938.92	10010.5	10047.3	7367.9	10611	10878.9	6520.5	8151.7	5386.37	5683.3	5399.64	6752.99
NEG_3596	11.345	305.252	FA 20:3	[M-H]-	C20H34O2	Lipids and lipid-like molecules	Fatty Acyls		0.848	51945.2	73685.7	51213.1	54643.8	65624	61526.6	32508.7	68570.2	54710.4	42024.5	75959.5	53193	24285.5	25775.8	114402	23133.4	25117.6	26644.3	23171.5	30139.2	30358.1	31763.4	28124.1	54461.9	55962.9	54512.7	61649.3
NEG_3344	11.404	293.252	FA 19:2	[M-H]-	C19H34O2	Lipids and lipid-like molecules	Fatty Acyls		0.818	10294.3	18656	14732	11391.8	19008.3	10871.1	33606.4	88914.7	59125.3	47197	74091.6	57506.6	31501.7	38773.2	197795	40503	36642.6	21248.7	19804	26660.2	28428.1	24409.7	25501.4	58274.3	62228.7	60770.9	65297.3
NEG_4077	11.411	325.188	Dihydroquinine	[M-H]-	C20H26N2O2	Alkaloids and derivatives	Cinchona alkaloids		0.704	59757.5	49320.4	127447	98480.8	25756.3	46118.5	62128.1	38055.8	39005.8	62775.6	43338.6	50387.7	34544.6	36854.1	49568.3	18488.9	46050	50215.8	38633.7	50589.8	43161.1	15521.2	57999.2	54977.7	46269.8	42270.2	50221.4
NEG_15045	11.412	845.479	Ginsenoside-Rg1	[M+FA-H]-	C42H72O14				0.747	311.306	128.61	0	234.606	134.955	314.277	729.203	939.729	735.666	601.584	552.33	524.111	395.02	729.917	4616.83	374.053	570.043	869.51	1118.03	1037.31	2015.96	1759.46	1133.65	1902.72	3265.82	1904.6	1942.16
POS_3055	11.421	293.248	14-(Hydroxymethyl)-5,9-dimethyltetracyclo[11.2.1.0~1,10~.0~4,9~]hexadecan-5-ol	[M+H]+	C19H32O2	Lipids and lipid-like molecules	Prenol lipids		0.905	4.48243e+06	4.15368e+06	4.98069e+06	4.35198e+06	3.64838e+06	3.88405e+06	2.99948e+06	2.36057e+06	2.72442e+06	3.0467e+06	2.43728e+06	2.67405e+06	3.11221e+06	2.96837e+06	2.38746e+06	2.94652e+06	1.9485e+06	3.32663e+06	3.8902e+06	3.59954e+06	3.06343e+06	3.25758e+06	4.45158e+06	2.58298e+06	2.78339e+06	2.51668e+06	2.62609e+06
POS_3462	11.428	315.228	Progesterone	[M+H]+	C21H30O2	Lipids and lipid-like molecules	Steroids and steroid derivatives	C00410	0.788	488894	500600	521972	491042	453040	461160	422360	399316	416244	467126	372444	407825	520523	492806	380238	500068	336712	483042	550056	563912	483516	556998	613132	447028	474066	427381	451597
NEG_3369	11.428	295.226	FA 18:2;O	[M-H]-	C18H32O3	Lipids and lipid-like molecules	Fatty Acyls		0.747	39014	25176.1	37226.1	37499.1	25485.4	52912.3	78110.5	29614.1	59392.6	89050.2	25201.3	33693.2	39406.1	41666.7	51715.4	39949.2	90624.3	84397.2	41832.5	59152.6	58413.4	39287	88770.5	40014.5	36204	35858.8	35685.9
NEG_488	11.454	138.021	6-Hydroxynicotinic acid	[M-H]-	C6H5NO3	Organoheterocyclic compounds	Pyridines and derivatives	C01020	0.739	20693.6	33294.3	26092.4	18088	19561	27728.2	16536.5	16478.2	8619.35	27106.4	13938.2	5640.38	22196.5	32649.5	17259.9	28434.5	53810.6	64370.4	21922.4	17825.6	41263	29354.5	17264.9	9009.15	13134.7	10009.4	13746.4
POS_13184	11.465	838.635	Isobutyryl CoA	[M+H]+	C25H42N7O17P3S	Lipids and lipid-like molecules	Fatty Acyls		0.729	14848.8	17976.3	25307.8	32985.8	22179	10571.8	29363.5	12370.9	28399.7	34307.4	40073.7	39453.7	14780.3	10446	42114	13182.7	20442.7	30203.1	9554.98	17141	33150.6	14678.9	40123.4	26491.7	15843.5	26656.1	9961.6
POS_4594	11.492	363.289	2-Methoxy-4-pentadecylbenzoic acid	[M+H]+	C23H38O3	Benzenoids	Benzene and substituted derivatives		0.712	59926.4	44897.4	56847.9	58536.7	50034.4	57255.2	66468.3	55314.6	65113.1	56980.8	54410.5	54245	50097.5	53323.2	43022.6	39888.3	39954.6	62059.8	65322.7	52917.7	59448.1	52411.4	76698.1	42784.4	46529.5	39301.3	43558.3
NEG_10178	11.5	563.51	2-Oahsa	[M-H]-	C36H68O4	Lipids and lipid-like molecules	Fatty Acyls		0.851	8228.09	11011.8	6940.25	7041.23	10937.4	11923	9196.72	25945.5	24431.3	15183.2	25888.2	27080	4646.15	6886.24	53683.4	5801.27	5699.02	17958.4	15742.4	22244.1	23423.2	16044.1	24026.1	27429	33005	26231.6	29713.2
POS_2910	11.539	284.295	[3-[(1Z,9Z)-Octadeca-1,9-dienoxy]-2-octadecanoyloxypropyl] 2-(trimethylazaniumyl)ethyl phosphate	[M-H2O+H]+	C44H86NO7P	Lipids and lipid-like molecules	Glycerophospholipids		0.773	844923	766747	887227	845167	730265	770642	968478	867143	942393	627183	951034	944754	834755	848393	732113	809003	687139	2.35124e+06	2.38278e+06	2.19773e+06	2.00618e+06	1.86539e+06	2.64741e+06	1.21761e+06	1.20901e+06	1.1408e+06	1.22192e+06
NEG_2660	11.571	269.249	Heptadecanoic acid	[M-H]-	C17H34O2	Lipids and lipid-like molecules	Fatty Acyls		0.826	48231.3	48241.9	71459.8	52538.3	47354.5	50372.1	55478.1	54167.4	41585.7	60481.5	61428.1	64220	46766.1	71530	61841.9	64341.3	66282.1	53487.8	47742	47991.7	51271.5	46117.6	68461	46705.2	57488.2	56675.5	57422.6
POS_4138	11.583	345.239	Testosterone_Propionate	[M+H]+	C22H32O3	Lipids and lipid-like molecules	Steroids and steroid derivatives		0.763	46978.5	25580.9	40714.4	36743.5	23936.9	38031.1	38430.8	28935.1	36285.6	31475.4	36616.2	31970.2	34677.6	29898	35106.1	29906.2	35002	29596.3	34993.8	41052.8	43753.7	24468	40378.8	34189.2	32228.2	28276.4	33558.4
POS_5742	11.606	413.266	2-Acetoxy-4-pentadecylbenzoic acid	[M+Na]+	C24H38O4	Benzenoids	Benzene and substituted derivatives		0.859	319054	290089	313839	282205	311827	314365	329751	275459	323826	259139	305598	325569	301258	296778	302147	284344	282058	317676	265355	281046	249965	259925	298061	301386	308053	253127	308114
POS_2803	11.607	279.159	Dibutyl phthalate	[M+H]+	C16H22O4	Benzenoids	Benzene and substituted derivatives	C14214	0.894	142071	101876	142537	217086	103358	126944	135771	131371	145217	90494.6	175076	159301	144505	142645	161870	131489	201004	156148	154585	130492	125215	118582	156990	181812	124834	150209	141641
POS_5218	11.607	391.285	Dioctyl phthalate	[M+H]+	C24H38O4	Benzenoids	Benzene and substituted derivatives		0.938	496654	451308	626296	478438	498079	503497	749359	513830	372220	276524	534712	573514	552044	383608	353279	534262	595904	402643	387784	525653	530171	536869	792029	517706	517149	518236	376996
POS_1005	11.607	167.033	Phthalic acid	[M+H]+	C8H6O4	Benzenoids	Benzene and substituted derivatives	C01606	0.824	35323.6	31891.4	38145	31099.1	35446.8	31312.5	38193.2	35169.9	41357.2	32236.9	38190.1	37796.7	38460.6	30554.6	37466.6	37848.9	36836	43551.4	46458.3	36985.5	34010.4	35245.1	44216.8	36244.4	37694.6	35846.7	35842.3
NEG_4171	11.607	327.295	FA 20:0;2O	[M-H]-	C20H40O3	Lipids and lipid-like molecules	Fatty Acyls		0.856	30879.5	30074.3	42770.8	32470	30426.2	29545.7	46935.9	53514.8	40391.2	44950.5	34789.3	45217.3	51446.6	49551.6	151503	44291.5	65736.9	24118	24642.8	26776.6	23230.1	35655.8	29580.7	70815.7	68308.1	87460.6	68237.3
NEG_3651	11.643	307.269	FA 20:2	[M-H]-	C20H36O2	Lipids and lipid-like molecules	Fatty Acyls		0.848	136400	159776	150052	129031	139826	131825	152645	196954	193667	138609	159728	189801	69677.8	65796.5	391755	58809	80755.2	68022.3	78747.4	82933.9	74235.3	69250.5	79900.2	206235	212235	194799	208543
POS_4506	11.677	359.316	Glyceryl monostearate	[M+H]+	C21H42O4	Lipids and lipid-like molecules	Glycerolipids		0.838	1.89829e+07	1.51566e+07	2.25834e+07	1.73064e+07	1.73988e+07	1.72092e+07	2.82089e+07	1.89862e+07	2.353e+07	2.07661e+07	1.88679e+07	2.07055e+07	2.6295e+07	2.8693e+07	1.52496e+07	2.46958e+07	1.09406e+07	2.08086e+07	2.30605e+07	1.85959e+07	1.57753e+07	1.57102e+07	2.24491e+07	1.56009e+07	1.67601e+07	1.58245e+07	1.56014e+07
NEG_3064	11.682	283.269	Methyl heptadecanoate	[M-H]-	C18H36O2	Lipids and lipid-like molecules	Fatty Acyls		0.852	412474	318232	422327	385027	282931	348244	417611	383851	416163	341797	309042	388707	313369	254303	860068	260227	399268	353094	410953	411337	382564	406220	352150	501500	566656	494067	558701
POS_8900	11.707	551.422	Echinenone	[M+H]+	C40H54O	Lipids and lipid-like molecules	Prenol lipids	C08592	0.752	218683	260590	224787	239362	243435	228280	152928	124936	124925	119445	117124	122641	101134	169020	47945.1	130059	35943	71876.4	77242.3	75616	68639.3	62077.4	73411.7	114273	125570	128586	122231
POS_3059	11.73	293.284	(2R)-1-(5-Hydroxy-3-methylpentyl)-2,5,5,8a-tetramethyldecahydro-2-naphthalenol	[M-H2O+H]+	C20H38O2	Lipids and lipid-like molecules	Prenol lipids		0.738	116880	128991	121503	118013	123945	120429	292805	215865	235854	245510	200379	235832	179381	197746	130477	202925	99051.8	204266	222553	190074	201232	209737	225167	137419	158138	158095	154487
POS_1269	11.738	185.154	(5S)-5-Heptyloxolan-2-one	[M+H]+	C11H20O2	Organoheterocyclic compounds	Lactones		0.712	126859	147630	127995	139416	150389	135649	230084	196892	207854	214606	176457	209427	194992	233389	152076	195042	121506	233959	236698	206387	221163	239399	244337	165256	170135	184120	165555
POS_2542	11.739	263.21	(1R,2R,4aS,8aS)-2-[(2R)-2-Hydroxybutyl]-1,3-dimethyl-1,2,4a,5,6,7,8,8a-octahydro-1-naphthalenecarboxylic acid	[M-H2O+H]+	C17H28O3	Organic oxygen compounds	Organooxygen compounds		0.742	32301.6	43461	37321.7	32539	18177.5	38861.6	49335	44444.7	34329.3	82206.6	37386.7	65079.5	47669.2	16579.5	36442.6	35929.1	50789.2	32291.1	40321.2	31546.9	44210.8	52715.3	76249.8	46201.8	53045.3	58513.6	49873.9
POS_789	11.739	153.125	(1S,4R)-(+)-Fenchone	[M+H]+		Lipids and lipid-like molecules	Prenol lipids		0.721	66525.5	103790	65406.6	91316.7	95295.5	76121.1	124870	110384	109316	112004	94656.4	117401	109335	122319	96549.7	107198	72596.5	105761	120492	116657	128706	143777	119590	102630	100212	119984	100159
NEG_8218	11.746	487.348	Asiatic acid	[M-H]-	C30H48O5				0.768	1086.25	739.839	603.587	902.591	574.892	1147.29	1984.33	516.617	953.584	1701.43	1240.14	1139.55	2323.44	1839.64	10651.3	2319.64	1589.87	1904.22	2182.63	1997.81	880.366	1167.69	722.181	2523.02	2359.31	2794.08	2478.62
POS_9318	11.816	573.481	3-{7-[5-(1-hydroxyhenicosa-4,8-dien-1-yl)oxolan-2-yl]heptyl}-5-methyl-5H-furan-2-one	[M+H]+	C37H64O4				0.714	22911.4	135954	21108.5	17754.5	15926.9	22674.8	37986.4	20296.1	30194.3	31269.3	15835.1	30892.6	30101.6	35616.1	33642.7	21951.7	24392.8	54470.9	58852.7	57651.6	49129.2	59200	61919.2	28099.6	29568.4	32695.9	24225
NEG_4543	11.823	341.31	FA 21:0;2O	[M-H]-	C21H42O3	Lipids and lipid-like molecules	Fatty Acyls		0.7	22188.6	22226	25999.1	22690.4	21521.9	23106.3	30883.4	43619.3	30539.6	33401.7	33062	30064.7	47515.9	38499.5	101709	41941.8	46590	28697.4	21965.2	30464.4	27051.8	33930.2	21850.5	56876.4	54180.1	72537.8	54289.1
NEG_3065	11.917	283.269	Stearic acid	[M-H]-	C18H36O2	Lipids and lipid-like molecules	Fatty Acyls	C01530	0.852	1.06525e+07	8.70274e+06	9.07314e+06	9.32224e+06	7.78761e+06	8.79761e+06	6.71552e+06	8.66609e+06	7.79575e+06	7.29178e+06	7.45183e+06	8.01961e+06	5.46058e+06	5.12875e+06	1.58695e+07	4.96895e+06	5.86072e+06	6.05668e+06	5.43832e+06	5.95534e+06	5.6949e+06	5.50586e+06	5.83123e+06	1.16913e+07	1.2812e+07	1.0729e+07	1.30761e+07
NEG_7777	11.928	471.349	Echinocystic acid	[M-H]-		Lipids and lipid-like molecules	Prenol lipids		0.831	27225.7	29098.9	21522.6	26825.1	24232.7	27659.8	22996	45841.7	41446.7	22633.6	37912.4	40256.6	29657.4	27650.9	176632	29615.9	24897.8	6191.33	5062.92	5607.26	6774.63	5661.94	4892.98	39246.8	42469.2	36247.1	45227.8
NEG_8495	11.949	497.344	Tsugaric acid A	[M-H]-	C32H50O4				0.731	12389.8	9118.53	12747.2	3503.03	9103.04	2609.68	6824.26	6855.37	12168.7	9687.44	10825.6	6614.65	7037.25	3640.93	15505.3	4986.23	9787.41	9429.52	6572.77	8323.51	6062.06	6941.15	4006.47	14091.3	14179.4	19867.1	14341.1
NEG_3699	11.97	309.284	FA 20:1	[M-H]-	C20H38O2	Lipids and lipid-like molecules	Fatty Acyls		0.859	183051	206716	161995	156489	171436	165152	220269	315576	300053	251907	280139	306653	87436.9	93552.7	583376	91387.1	101294	172714	179301	192323	180940	164624	201276	356491	432416	325909	438115
POS_5465	11.987	401.334	7-Ketocholesterol	[M+H]+	C27H44O2	Lipids and lipid-like molecules	Steroids and steroid derivatives		0.759	108377	79410.4	104690	87717.1	66676.8	99956.1	95804.5	84297.1	123066	104369	137290	140457	63599.9	78815.4	78704.3	74065	35963	146659	185950	190438	150627	146159	210374	101793	101148	100007	101413
POS_5796	12.062	415.313	Diosgenin	[M+H]+	C27H42O3	Lipids and lipid-like molecules	Prenol lipids	C08898	0.771	34274.3	22560.1	17989.2	24099.1	22417.5	21144	19564.2	23966.5	24676.7	24037.8	22328.1	30562.8	35110.8	31473	24305.2	31984.2	26877.6	112874	105372	46764.1	90318	77098	115054	29325.7	33214.2	28598	29109.4
POS_3969	12.068	338.342	Erucamide	[M+H]+	C22H43NO	Lipids and lipid-like molecules	Fatty Acyls		0.983	6.63471e+07	4.23907e+07	7.05086e+07	5.89737e+07	5.43683e+07	5.85503e+07	6.78263e+07	5.16438e+07	7.34075e+07	6.05231e+07	5.73675e+07	7.07592e+07	9.64568e+07	1.0796e+08	6.93985e+07	9.59347e+07	6.4205e+07	1.37844e+08	1.38051e+08	1.13208e+08	1.16289e+08	9.72821e+07	1.37617e+08	1.16176e+08	1.1581e+08	1.04425e+08	1.16401e+08
NEG_3771	12.15	311.302	Arachidic acid	[M-H]-	C20H40O2	Lipids and lipid-like molecules	Fatty Acyls	C06425	0.748	27457.7	29131.8	26707.1	34028.6	22864.7	35004.7	22202.1	31779.1	26410.4	22625.7	21872	30360.8	24377.8	17519.8	39560.3	19338.4	17568.3	24253.9	25748.1	25866.6	25155.9	25461.8	18434.8	36131.1	34426.5	36978.5	36829.5
NEG_3437	12.153	297.285	FA 19:0	[M-H]-	C19H38O2	Lipids and lipid-like molecules	Fatty Acyls		0.832	68194.8	55830.8	65493	61424.2	51919	58435.5	60105.1	63251.5	68552.2	57188	62511.6	64873.7	55163.5	52367.6	74105.7	48332.7	58852.4	57855.6	59148.1	55129.4	56748.5	49366.5	56499.6	68763.6	67723.7	66227.3	72113.2
NEG_15566	12.156	911.485	Soyasapogenol B base + O-HexA-Pen-dHex	[M-H]-	C47H76O17	Lipids and lipid-like molecules	Prenol lipids		0.721	1413.67	2704.49	5645.58	1699.24	3911.2	1591.37	2003.16	1179.27	792.895	6084.3	988.825	570.469	1593.87	2464.27	11722.9	3781.57	2135.07	2539.6	2908.04	1532.62	1968.44	3043.03	1533.13	5029.12	3603.52	11100.4	3160.92
NEG_9007	12.221	515.382	FA 36:10	[M-H]-	C36H52O2	Lipids and lipid-like molecules	Fatty Acyls		0.768	19622	33934.8	18621.7	18281	30102.6	16508.6	20348.5	33156.2	32899.5	37053.2	21232	18884	19820	17340.9	32624.1	34413.8	21292.2	19692.1	18474.5	33331.6	33969.9	19482.5	31323.7	20379.7	32970.4	31150.3	32746.8
NEG_5146	12.25	369.341	FA 23:0;2O	[M-H]-	C23H46O3	Lipids and lipid-like molecules	Fatty Acyls		0.838	38634.1	37831.5	47650.7	39894.2	32817.8	40574.7	45084.4	65685.7	45229.5	49740.1	37013.1	38611.4	70435.4	62633.1	148479	58571.1	65367.5	46579.5	40807.9	37426	40486.5	50099.9	39657.4	84880.1	85118.4	104652	85244.7
POS_5804	12.256	415.358	2,3-dimethyl-5-(3,7,11,15-tetramethylhexadec-2-en-1-yl)cyclohexa-2,5-diene-1,4-dione	[M+H]+	C28H46O2				0.838	69203.3	64751	71693.7	74001.1	63767.6	64332.6	76873.2	62880.4	72637.8	63497	71731.7	67641.4	32114.1	56866.4	37341.7	62290	22276.7	197426	207473	197755	183545	171049	214526	68962.9	68990.7	77793.4	69009.3
NEG_14873	12.289	829.498	Ginsenoside F2	[M+FA-H]-	C42H72O13				0.777	6853.63	5816.59	7299.64	5716.13	5598.77	4071.67	3260.37	3542.74	3538.6	5007.54	3574.77	2555.3	2317.83	2188.83	29824.5	1923.49	2268	2637.06	3117.78	3354.5	2789.82	1339.63	3549.14	10949	10582	10950.9	8405.57
POS_3288	12.307	306.28	Cyclic cmp	[M+H]+	C9H12N3O7P	Organic oxygen compounds	Organooxygen compounds		0.897	561459	493896	610340	584001	505805	509520	597891	493648	575214	514092	579967	555831	1.09193e+06	1.07131e+06	781441	1.07172e+06	604345	281809	308538	280570	259301	248497	312458	437538	443607	477296	437488
NEG_13433	12.316	738.492	PE 36:4	[M-H]-	C41H74NO8P				0.789	54252.4	95203.1	45944.8	58417.9	40921.1	107571	31569.2	113658	26478.1	11105.2	29008.6	67894.4	80637.1	78358.9	422343	38246.3	76994.8	39189	22389.5	17055.9	41642.9	36143.8	55320.8	268545	309102	35142.4	343337
NEG_6111	12.33	409.41	FA 27:0	[M-H]-	C27H54O2	Lipids and lipid-like molecules	Fatty Acyls		0.75	30422.1	25671.2	25976.1	27314.5	28547	27588.2	27920.4	26978.3	28855.2	24994.8	27342.8	27949.8	30389.1	26038.5	23656.7	22144.8	28823.8	27618.9	22590.1	28809.9	27744.1	26876.7	29542.9	26018.3	26028	29353.2	26033.8
NEG_12981	12.358	712.501	PE 34:3	[M-H]-	C39H72NO8P				0.708	5606.31	5611.36	7292.91	5751.8	4598.15	5382.28	4365	3296.24	4017.08	3990.56	3518.12	4040.25	3461.52	3311.22	50875.7	4865.04	3414.7	3736.35	3898	3271.03	2956.86	4303.32	4976.59	10987.8	11657.5	14225.1	9011.51
NEG_13971	12.385	769.509	PG 36:4	[M-H]-	C42H75O10P				0.891	6325.05	6279.64	6635.28	6514.35	5457.83	5513.79	7023.79	6846.13	6867.52	6633.78	5589.36	6541.07	4052.54	3942.35	36056.9	4475.81	3572.04	2347.93	2526.64	2081.2	2672.33	2224.89	3151.19	13744.4	14308.4	14654.6	14088.6
NEG_7354	12.391	455.357	Betulinic acid	[M-H]-	C30H48O3	Lipids and lipid-like molecules	Prenol lipids		0.779	24660.7	26215.4	23209	20620.4	19587.7	20101.4	19894.3	24684	24096.8	20151.5	19587.6	22993.8	10521.3	9701.06	73055.4	9918.25	11549.6	10430.7	11477.8	11309	11016.3	8904.6	11832.8	45175.7	45635.6	41804.9	45631.2
NEG_12230	12.442	667.444	Ginsenoside Rh2 (S-FORM)	[M+FA-H]-	C36H62O8				0.75	21502.1	19565.3	24724.1	18027.6	15779.9	14422.1	10352.1	11573.3	11856.3	15538.6	10044.4	11272.5	8013.45	8683.35	57252.5	9013.11	9560.82	11119.7	11318.4	10803.7	11781	10517.2	11812.6	32978.8	32415.9	37165.8	32083.9
NEG_4097	12.457	325.314	Heneicosanoic acid	[M-H]-	C21H42O2	Lipids and lipid-like molecules	Fatty Acyls		0.802	19843	12863.9	13993.1	16922	12740.8	14633.6	18052.7	12767	13867.1	12467.3	14919	17350	16212.2	13418.8	11499.3	15848.3	13718.5	38495.1	16358.8	15164.1	17647.9	13019.1	15032	15313.9	14580.8	16589.5	14014
POS_13639	12.464	959.541	Soyasaponin Ba	[M+H]+	C48H78O19	Lipids and lipid-like molecules	Prenol lipids		0.72	626214	303486	328248	902691	125072	388010	196340	351163	338266	470689	413658	450975	313645	376982	114059	165824	142535	196249	178205	428906	378148	212792	393280	295378	241566	393154	285181
NEG_5462	12.483	383.356	FA 24:0;2O	[M-H]-	C24H48O3	Lipids and lipid-like molecules	Fatty Acyls		0.891	124148	118778	132344	119514	113391	124293	135080	182708	140683	143880	123938	127778	173890	156451	337217	149754	185006	131736	128823	125550	143159	139217	141115	221446	221557	257044	221854
POS_6099	12.546	429.374	All-rac-3,4-Dehydro-alpha-tocopherol	[M+H]+	C29H48O2				0.783	197211	162940	216017	181203	162986	172632	252697	205305	215119	209544	225339	222192	361320	367837	183120	382327	135776	513697	520499	466355	435274	415134	520816	234362	256214	227730	245567
NEG_12666	12.559	693.461	PG 30:0	[M-H]-	C36H71O10P				0.867	278724	366518	486789	284649	262236	249055	286459	254987	249276	543632	226165	240875	225672	253198	3.39664e+06	262046	292828	380063	369568	289337	376056	352304	360495	864602	755522	1.16585e+06	822350
NEG_13477	12.588	740.534	PE 36:3	[M-H]-	C41H76NO8P				0.883	38248.8	45925.7	17708	31879.3	30759.9	32643.8	20613.7	27206.3	25892.6	22353	19611.1	22266.8	19371	18721.6	560372	18858.4	23129.8	35496.7	42897.6	41500.5	37432	33513.8	48547.4	114933	115012	117423	116957
NEG_13011	12.611	714.518	PE 34:2	[M-H]-	C39H74NO8P				0.728	18162.6	20763.8	21590	15655.8	13568.5	15958.7	16415.7	17997.2	17213.6	16640.9	14578.5	14494.4	16336.3	16348.3	527522	13834	20772.7	10585.7	9747.56	13560.4	15705.7	12427.7	16008.6	65479	64181.3	72538.6	64233.3
NEG_15592	12.641	916.487	Solasodine base + 2H, 1O, O-Hex-Hex-Hex	[M-H]-	C45H75NO18	Lipids and lipid-like molecules	Steroids and steroid derivatives		0.777	17637.4	14460.7	19144.8	13281.3	11329.2	12324.9	12707	10045.2	12695.9	7001.27	10021.8	12286	9765.99	9451.13	63509.3	8121.17	11682.7	10644.2	12097.7	9867.54	8775.93	7691.62	11012.1	28392.5	28806.9	22920.9	27362.7
NEG_15641	12.655	925.505	Saikosaponin C	[M-H]-	C48H78O17				0.763	6037.68	6647.25	4966.17	4892.81	3270.27	4606.67	6256.04	8046.99	8387.8	2181.17	6287.26	7599.19	5687.51	5938.51	41525.3	5632.31	7027.29	6282.57	6826.19	6431.41	6498.76	6003.06	9184.31	17161.4	17745.1	16955.6	18914.6
NEG_15161	12.657	857.521	PI 36:4	[M-H]-	C45H79O13P				0.849	74251.9	78999.7	85902.8	64813.8	53950.4	58939.9	97217.3	97480.9	105919	26902.3	89334.2	113382	72949.6	67715.1	2.49443e+06	66305.6	100449	88453.9	96432.4	95636.5	91044.9	65828.1	126732	380893	408018	148367	408226
NEG_13369	12.659	734.485	Erythromycin	[M-H]-	C37H67NO13	Organic oxygen compounds	Organooxygen compounds	C01912	0.75	28472.7	31835.4	31218.2	23979.6	21938.1	23148.3	15248.5	14931.4	16728.6	13449.9	12620.2	16181.8	21177.9	22496.9	401053	21403.8	29850.2	18945.7	22861.7	20999.9	21271.8	18365.4	25436.3	93629.1	98117.1	85282.7	94884.5
POS_6012	12.673	425.372	Lupenone	[M+H]+	C30H48O				0.788	63340	75179.9	91296.4	90237.5	74322.6	16396.1	140450	87439.9	104152	116593	44264.2	96757.2	311318	352121	152225	362926	117470	85171.3	123681	98969.1	104825	87367.6	102664	129403	131540	138768	129479
POS_12759	12.694	789.471	Ginsenoside Rk1	[M+H]+	C42H70O12				0.747	74297.5	76804.9	70692.4	77613.4	71547.3	77802.2	54280.6	44386	43675.1	41653.9	43829.5	44626.8	148188	134179	97161.6	140932	73782.5	31595.7	33792	31837.9	30793.1	31483.3	32679.6	64309	71498.7	65509.2	66339.1
POS_5095	12.705	383.366	Campesterol	[M+H-H2O]+	C28H48O	Lipids and lipid-like molecules	Steroids and steroid derivatives		0.824	179678	170613	158836	177033	156294	176905	184470	159109	166856	166651	170431	177181	130040	141054	76164.5	202523	58615.9	336098	307820	330736	325231	323504	263506	186887	204106	184819	190825
NEG_13970	12.731	769.485	Ginsenoside F3	[M-H]-	C41H70O13				0.789	18502.7	12573.9	12075.7	14864.4	9031.74	12566.1	4453.37	7046.33	6019.1	4018.91	6012.26	7643.48	6316.04	5648.82	55379.9	4693.4	7444.87	6991.29	4178.23	5953.89	8864.86	6504.22	9412.55	24433.6	26640.9	14117.6	30449.7
NEG_10066	12.751	559.317	[2-Hydroxy-3-[3,4,5-trihydroxy-6-(hydroxymethyl)oxan-2-yl]oxypropyl] octadeca-9,12,15-trienoate	[M+HCOO]-	C27H46O9	Lipids and lipid-like molecules	Glycerolipids		0.702	4132.53	3061.47	4160.38	3683.12	2575.29	3622.52	1890.22	1606.62	1703.32	1893.39	1354.46	2400.37	848.533	918.321	6615.94	1700.81	1046.27	1250.82	3084.8	1839.42	1937.26	1339.46	1894	4758.59	6008.01	5812.25	5999.38
POS_2511	12.759	261.218	8-Hydroxy-9,10-epoxystearic acid	[M-3H2O+H]+	C18H34O4	Lipids and lipid-like molecules	Fatty Acyls		0.837	258917	165816	257241	245188	196873	214151	150079	60987	59900.9	98259.2	114836	59858.3	100442	107821	45805	71119.7	31919.6	105727	54325.1	93202.6	81964.2	38178.5	60990.7	120258	123245	98374.9	123347
POS_2926	12.808	285.239	2,3-Dihydroxypropyl tetradecanoate	[M-H2O+H]+	C17H34O4	Lipids and lipid-like molecules	Glycerolipids		0.755	90537.4	117859	83251.4	139159	70136.4	89600.1	52093.5	36561.3	36337.4	37515.3	33040	40829.2	16531.8	14477.7	11831.5	21394.1	6678.14	56469.7	77123.1	53247.9	26407	45350	35140.5	31875	31494.7	31881	25954.1
POS_2549	12.829	263.234	5-dodecyl-4-hydroxy-4-methylcyclopent-2-en-1-one	[M+H-H2O]+	C18H32O2				0.778	158753	114574	129933	85481.9	97484.9	92547.2	210982	125047	156896	117324	152187	155036	94757.3	188920	96174.8	122777	170030	154318	233907	165038	148065	141876	240038	113254	113336	102016	108829
POS_8902	12.833	551.498	Methyl 18-(hexadecanoyloxy)octadec-9-enoate	[M+H]+	C35H66O4				0.851	648944	587906	280088	655262	713077	245769	789258	123170	451606	572994	393700	531852	467042	516211	640445	623221	990297	467701	1.49035e+06	662658	559916	657076	944744	605624	536272	978784	282943
POS_7835	12.848	507.311	7-Hydroxy-4-[(3Z)-5-hydroxy-3-methyl-3-penten-1-yl]-4a,8,8-trimethyl-3-methylenedecahydro-2-naphthalenyl beta-D-mannopyranoside	[M+Na]+	C26H44O8	Lipids and lipid-like molecules	Prenol lipids		0.708	753408	640403	632445	1.00681e+06	807379	644966	1.0612e+06	757156	854153	903626	802083	1.06521e+06	696557	388814	746941	1.08674e+06	808003	798277	303928	421677	1.08697e+06	633625	390978	895078	896129	698949	894919
NEG_15174	12.898	859.514	PI 36:3	[M-H]-	C45H81O13P				0.773	6358.99	7171.21	4782.9	6896.22	3443.41	7344.24	3244.79	9898.68	3861.58	289.029	4776.15	7547.88	4999.25	3817.47	62335.4	2043.96	5022.43	11224.2	4557.97	11297.5	17135.2	6449	16353.8	28172.9	31865.2	9182.93	36956.1
NEG_14927	12.92	833.533	PI 34:2	[M-H]-	C43H79O13P				0.935	3.49151e+06	3.96716e+06	3.89069e+06	2.87626e+06	2.44449e+06	2.54334e+06	1.95727e+06	2.32502e+06	2.05292e+06	1.90141e+06	1.5102e+06	2.14523e+06	775718	746480	3.13702e+07	738650	1.05872e+06	1.73446e+06	2.01524e+06	1.93907e+06	1.94735e+06	1.57721e+06	2.62555e+06	1.0735e+07	1.07992e+07	1.09208e+07	1.0647e+07
NEG_15143	12.936	855.502	PI 36:5	[M-H]-	C45H77O13P				0.75	17861.4	22822.7	16390.9	17170.6	16088.2	15931.9	12345.4	16805.9	14198.2	6294.26	12488.6	15454.1	8458.39	8693.27	6591.1	8187.59	7939.81	14134.4	13745.9	15742.2	15545.9	16618.6	14564.9	15830.4	23144.6	8552.38	17577.3
POS_5659	12.941	409.38	Euphol	[M+H-H2O]+					0.75	49589.5	149760	115638	91388.1	71946.1	78197.9	80382	46938.6	91929.9	73319.8	104089	286786	62927.7	110754	144182	55987.3	158826	106349	238138	69310.1	51267.4	131968	162407	80897.6	109300	79876.7	78293.7
NEG_4484	12.941	339.332	Docosanoic acid	[M-H]-	C22H44O2	Lipids and lipid-like molecules	Fatty Acyls	C08281	0.833	215035	215138	235724	196753	176447	188197	247529	351269	245745	252731	208491	260930	176402	178522	716271	171075	193907	157494	144406	148833	152562	148201	174887	345419	375709	355912	371567
NEG_13508	12.951	742.544	PE 36:2	[M-H]-	C41H78NO8P				0.825	4635.78	3709.58	4354.38	7456.3	2341.49	6576.11	5426.74	5521.45	5460.11	2775.97	7612.93	5951.46	5349.95	4277.58	222322	4015.13	4532.18	6696.57	3699.87	6075.57	5849.4	4014.02	8079.1	27529.6	26891.6	25061.7	28236.4
NEG_13570	12.988	745.515	PG 34:2	[M-H]-	C40H75O10P				0.952	2.15258e+06	2.57855e+06	2.37454e+06	1.98493e+06	1.61808e+06	1.49985e+06	899621	1.03523e+06	987923	863619	798159	1.06285e+06	311458	310289	1.77794e+07	424113	206029	677110	795375	883128	798327	622114	931982	4.84332e+06	4.42132e+06	4.73635e+06	4.85382e+06
NEG_5048	12.991	365.346	Nervonic acid	[M-H]-	C24H46O2	Lipids and lipid-like molecules	Fatty Acyls	C08323	0.861	26263.8	22456.3	20823.6	27144.9	19708.4	28838.7	30096.7	30704.9	34320.6	30470.1	31569.9	34120.7	29064	26443.2	22612.5	24671.3	24443.7	30799.9	26439.8	31763.7	30561.6	23261.6	25790	23925.9	15934.7	22701.5	23903.6
NEG_6149	12.993	411.384	FA 26:0;2O	[M-H]-	C26H52O3	Lipids and lipid-like molecules	Fatty Acyls		0.86	51046.4	51391.1	56325.1	51335.7	52053.7	51398.5	50506.6	58634.2	53356.1	53140.5	53099.5	53073.5	65347.7	69716.6	57225.9	57702.7	49943.4	59014.1	55896.7	61009.3	61754.5	57267.9	54832.3	52791.6	48567.8	55514.5	54580.6
NEG_6444	13.046	423.419	Octacosanoic acid	[M-H]-	C28H56O2	Lipids and lipid-like molecules	Fatty Acyls		0.848	36535.4	43923	39756.8	40874.9	41189.5	41157.6	54047.5	48133.6	42258.1	41049.3	46925.2	50622.9	56860.2	55071.4	23453.8	54516	46958.3	44118.9	42739.9	48720.9	49101	51606.3	39912.2	33275.9	31719.2	40848.3	31845.7
NEG_2776	13.05	277.214	gamma-Linolenic acid	[M-H]-	C18H30O2	Lipids and lipid-like molecules	Fatty Acyls	C06426	0.722	21943.9	40002	38068	39690.4	35082.8	21925.3	33291.1	30130.6	30417.3	25781.4	19367.4	44357.2	24540.6	14561.2	53833.8	16631	31245.8	47926.9	52282.9	61119.8	54955.9	51248.3	53075.5	47369	46515.5	53100.5	48338.6
NEG_15071	13.064	847.517	PI 35:2	[M-H]-	C44H81O13P				0.727	1498.1	1313.61	1070.3	1903.99	820.47	989.296	636.323	2792.45	1473.46	432.833	1657.08	2431.5	2128.34	1904.24	1783.47	312.525	219.488	1358.51	1398.78	2060.66	2100.69	1349.57	1304.6	2871.72	3214.45	2965.38	5715.96
POS_8809	13.093	547.468	3-{7-[5-(1-hydroxynonadec-4-en-1-yl)oxolan-2-yl]heptyl}-5-methyl-5H-furan-2-one	[M+H]+	C35H64O4				0.792	1.44173e+06	821447	1.34577e+06	977596	812608	957925	450485	233665	270439	347255	314121	322203	200908	300855	47636.3	283577	77277.1	1.01867e+06	1.17674e+06	958191	992421	771758	963337	595726	636150	544906	573998
NEG_14023	13.16	771.522	PG 36:3	[M-H]-	C42H77O10P				0.739	8803.88	11366.7	12399.9	9178.84	9276.93	6205.48	3590.32	6490.77	4684.38	2026.14	4917.44	4635.08	6005.07	4654.43	222460	4644.03	7410.53	1845.16	2553.34	1811.24	2438.35	2017.75	3027.9	40218.4	36755.6	61923.1	36532.6
NEG_13896	13.162	765.476	Ginsenoside Rg5	[M-H]-	C42H70O12				0.722	7602.48	13317.5	15126.1	9287.27	10923.1	7664.7	15744.8	10666.1	7717.15	20461.6	15595.7	9185.57	12100.8	16669.3	38412.8	13130.2	14678.9	26660.2	28773.8	25013.8	31040.6	39682.1	35398.4	21437	19362.6	37882.1	19170.1
POS_5055	13.171	381.348	6-{5a,11-dimethyl-1H,2H,3H,4H,5H,6H,7H,8H,9H,9aH-cyclopenta[a]phenanthren-1-yl}-2,3-dimethylheptane	[M+H]+	C28H44				0.778	112497	130217	129173	156351	130087	99118.6	126729	125767	120802	125054	130503	136248	65929.7	77719.3	45198.6	85135.2	32089.4	238812	212775	233268	238675	221708	207814	143163	146202	122294	148500
POS_13467	13.18	907.522	Chlorophyll b from Chlorella	[M]+	C55H70MgN4O6	Organoheterocyclic compounds	Tetrapyrroles and derivatives		0.748	1109	1569.08	1885.42	784.859	303.614	500.758	37580.4	29646.2	39245.9	22890.3	29477.8	30234.8	17825.8	16596.5	6116.23	26178	4480.46	19238.1	15944.8	20267.8	24760.5	21290.3	14516.3	25083.2	27320.5	21854.3	26663.9
NEG_14230	13.206	783.485	Ginsenoside Rg2	[M-H]-	C42H72O13				0.715	44010.2	37576.7	30232.5	46488.3	39652.6	44241.6	29045.9	32011.6	36491	12822.5	33956.4	27533.3	14840.1	14166.9	32382.4	12841	18634.1	22022.7	22805	21869.6	22951.3	22933.1	23646.3	30895.4	6480.78	35396.4	28036.3
NEG_6868	13.22	439.367	Roburic acid	[M-H]-	C30H48O2				0.766	5862.15	1757.82	8437.54	4916.77	1840.86	3457.1	7231.82	1499.97	11807.5	3790.56	5460.57	4598.26	10487.3	5311.16	28587.7	4554.19	11284.5	5119.13	4650.48	3800.79	5217.97	3215.49	9296.75	6506.44	3245.45	6167.02	2465.86
NEG_4789	13.22	353.348	Tricosanoic acid	[M-H]-	C23H46O2	Lipids and lipid-like molecules	Fatty Acyls		0.785	72621.3	65237.6	67942.9	80674.5	74760.9	74813.8	74471.7	98636.4	80905.3	81732.2	86394	76822.2	87209.6	81406.3	31948.7	75373.6	89805.6	76766.1	80685.1	74986.6	83329.4	81553	79046.7	53304.2	53315.4	56349	53316.2
NEG_14940	13.262	835.519	PI 34:1	[M-H]-	C43H81O13P				0.815	38468.6	17986.7	55131.6	82002.3	44970.4	67195.5	21629	96253.2	28451.6	12711	31104.6	51667.8	17418.9	16103.7	175346	13063.8	23739.2	84206.2	38361.9	65382.8	117094	114204	120153	303542	322210	56200.2	316064
NEG_8208	13.264	487.304	Polygalic acid	[M-H]-	C29H44O6				0.812	54607.8	55711.3	62407.9	41671.8	69946.1	82441.8	60419.7	61319.1	55692.7	52219.4	50441.3	45400.7	72106.6	34929	56571.4	62424.7	67132.8	70581.8	67394.6	60315.6	85774.2	85964.9	63959.8	47384.6	51014.1	56894.9	48322.9
NEG_13139	13.281	721.513	Dipalmitoylphosphatidylglycerol	[M-H]-	C38H75O10P	Lipids and lipid-like molecules	Glycerophospholipids		0.928	170144	199031	200486	161098	126380	140606	99426.9	302409	130300	105399	84990	96759.6	97691.4	85786.9	1.16845e+06	87753	126206	159446	124385	143155	173420	241969	169447	732843	804084	803267	803207
NEG_13609	13.33	747.532	PG 34:1	[M-H]-	C40H77O10P				0.81	203387	185225	254450	195317	158767	166521	132338	175637	135386	129866	117512	119961	64374.9	61170.3	1.68699e+06	64990.5	93120.1	168736	212224	191500	193029	169861	261602	614416	602708	742378	601857
NEG_5103	13.39	367.356	Tetracosanoic acid	[M-H]-	C24H48O2	Lipids and lipid-like molecules	Fatty Acyls	C08320	0.855	23058.2	14983.7	54701.2	27692.4	27495.2	27482.9	58950.1	33678.5	22714.4	20293.6	36636.7	14599.2	34789.1	37797.5	32480.6	38406	94657.8	50592.1	66881.6	28270.5	35393.4	43876.9	84222.6	15710.2	24883.8	18034.4	14636.5
NEG_15201	13.396	861.564	PI 36:2	[M-H]-	C45H83O13P				0.888	67672	63386.9	93752	68978.5	50345.5	57591.2	68546	98974	76853.1	68535.1	65064.9	75345.2	51718.4	47086.7	868916	44039	69526.6	42092.1	53716	48396	52226.6	40945.7	61647.2	271963	265583	291748	266288
NEG_11859	13.426	647.473	1,2-Dipalmitoyl-sn-glycerol 3-phosphate	[M-H]-	C35H69O8P	Lipids and lipid-like molecules	Glycerophospholipids	C00416	0.763	3846.99	6340.82	6806.47	6259.52	5281.78	4398.17	3918.89	5692.52	3556.95	5630.91	4872.94	2544.47	3196.47	5200.85	6577.3	5312.44	3893.11	5939.93	5589.2	4995.19	6208.36	5927.09	3724.07	7204.67	6303.83	8839.92	6928.54
NEG_14071	13.472	773.543	PG 36:2	[M-H]-	C42H79O10P				0.866	25730.1	25801.8	30822.3	25672.7	21649.3	19212	14976.1	18036.4	15495.9	14327.8	13906.7	15548.9	9991.39	9976.84	135080	10538.8	11535.8	9792.09	12428	15903.7	10868.5	7717.91	11300.3	46346.8	47258.3	52382	40471.5
NEG_12333	13.482	673.491	(1-Hexadecanoyloxy-3-phosphonooxypropan-2-yl) octadec-9-enoate	[M-H]-	C37H71O8P	Lipids and lipid-like molecules	Glycerophospholipids		0.761	51344.1	93890.6	126454	85709.1	67548.7	63558.9	76250.4	77307.2	59295.7	164139	69263.3	53977.5	68616.6	66682.3	315475	77683.4	86925.4	124762	114565	102195	151275	143994	126681	183287	155964	342229	158028
POS_5350	13.495	395.369	alpha-Spinasterol	[M+H-H2O]+		Lipids and lipid-like molecules	Steroids and steroid derivatives		0.756	428998	322634	221182	430854	224593	438510	233765	290655	173409	316955	379489	395777	205414	225053	128573	192745	83755.6	293336	231394	305757	282396	300054	248040	264763	271627	265045	291770
NEG_7055	13.503	447.096	Cynaroside	[M-H]-	C21H20O11				0.794	57608.7	58790.2	29630.6	36926.9	58248.2	35080.7	9944.79	13322.4	6646.29	4554.53	9680.82	3890.03	25954.6	20369.8	34779.5	35878.5	27617.2	7762.51	17168.5	21059.4	7709.66	5217.17	4356.79	13339.2	23368.7	18231.6	22452.8
NEG_6912	13.512	441.381	FA 30:5	[M-H]-	C30H50O2	Lipids and lipid-like molecules	Fatty Acyls		0.712	20863	20213.7	21890.7	20353.1	16503.2	16929.9	7290	12846.6	10989.9	8791.34	7717.64	10500.2	12307.8	9771.59	101177	9024.33	13769.2	3758.42	3882.39	5331.71	4043.65	2741.39	4181.1	35540.1	37665.1	33004.1	37515.9
POS_10345	13.534	626.567	Asteriaceramide A	[M+H]+	C38H75NO5				0.779	85639.5	93058	77138.2	91507.3	96079.6	116039	113412	173595	175863	138723	175170	161987	33922.1	36879.8	46119.1	63843.6	30788	76202.7	35020.3	74388.9	62605.6	55492.4	39911.1	88243.3	85612.3	88869.4	88866.1
NEG_2961	13.549	281.253	Vaccenic acid	[M-H]-	C18H34O2	Lipids and lipid-like molecules	Fatty Acyls	C08367	0.827	35404.9	92428.4	48091.3	29969	82727.4	77610.5	37352.7	128393	30471.1	53850.1	30751	62513.1	41767.2	38766.9	45373.3	29723.6	41149.2	42104.7	53865.6	13756.6	18081.1	59348.7	23390.7	73861.3	96735.3	101141	69371.9
NEG_5719	13.559	393.373	FA 26:1	[M-H]-	C26H50O2	Lipids and lipid-like molecules	Fatty Acyls		0.818	12996.4	13088.3	15921.8	16661.5	18289.1	13269.5	29674.6	17941.7	24834.6	17619	20104.4	20118.5	15810.6	13665	14142.2	13257.8	19431.7	17049.4	20462.2	16390.6	15550.5	13481	12831.2	18261.8	15065.1	18675.5	12884.2
NEG_14460	13.628	799.5	Ginsenoside Rf	[M-H]-	C42H72O14				0.75	8582.33	8994.2	10991.7	8179.49	6635.64	6738.97	6641.69	7175.2	6629.84	7550.42	5085.64	6205.88	7356.89	5839.55	29858.3	6546.89	8289.94	24957.1	28844.9	26527.8	29979.9	24583.4	33054.4	30432.8	27230.7	32596.1	29702.9
NEG_13266	13.675	728.537	PE 35:2	[M-H]-	C40H76NO8P				0.842	12038.4	13464	15809.3	14243.7	11085.5	11547.8	8701.44	8383.73	7936.88	11296.3	7262.58	7884.77	15919.2	14270.2	368949	15228.3	21568.2	63890.4	83462.9	81779.1	77094.4	61561.2	97942	121076	116695	124795	120036
POS_5756	13.689	413.378	Stigmasterol	[M+H]+	C29H48O	Lipids and lipid-like molecules	Steroids and steroid derivatives		0.775	87056.6	85819.4	90692.2	86610.3	77990.7	96483	1.02535e+06	870364	972217	951329	969468	1.09258e+06	1.09511e+06	1.22968e+06	559788	1.23466e+06	455717	524254	493766	463144	471527	595475	582976	641820	641726	641866	685476
NEG_6821	13.705	437.432	FA 29:0	[M-H]-	C29H58O2	Lipids and lipid-like molecules	Fatty Acyls		0.828	26673	29093	19014.4	30079.8	29980.9	26792.9	27153.8	28584.4	26931.5	18152.5	30029.2	20029.1	29242.9	18332.4	15221.6	28573	28474.1	24815.4	16699.3	28816.2	25745.2	29040	24677.6	18652.8	17136.9	19187.6	19182.3
POS_6059	13.722	427.392	Taraxasterol	[M+H]+		Lipids and lipid-like molecules	Prenol lipids		0.758	33741.4	72907.7	58072.6	60399.7	47891.6	62201.3	204245	186661	185384	194911	198000	158164	263907	414930	132718	381268	141210	59698.3	70203.1	74674.1	67384.1	74438.7	81096.4	229811	247327	242715	249682
NEG_5411	13.734	381.372	Pentacosanoic acid	[M-H]-	C25H50O2	Lipids and lipid-like molecules	Fatty Acyls		0.86	49467	45761.5	53842.8	54908.5	47860.7	51888.6	51579.5	53680.8	58016.7	51741.2	55564.3	50103.5	52783.3	50002.2	35048.2	51576.3	55295.9	50609.2	46505.9	48716.8	51304.8	47647.7	50324	38287.7	41574.5	38017.2	38667
POS_6015	13.786	425.374	17(21)-Hopen-6-one	[M+H]+	C30H48O	Lipids and lipid-like molecules	Prenol lipids		0.806	146511	117751	168008	96800.3	119728	137584	78292.2	68609	85198	76501.8	73015.7	108175	462201	27806	12308.5	31499.6	235114	49054.4	31964.2	62187.1	33572.2	54465.3	34177.4	54850.2	45910.4	48856.6	50158.6
NEG_13638	13.866	749.544	PG 34:0	[M-H]-	C40H79O10P				0.817	8508.38	7509.17	9331.93	6726.91	5403.49	6242.89	6060.78	10817.5	5716.38	4447.02	4189.42	6018.69	5424.75	5193.61	32543.6	4131.16	7193.27	4720.08	4024.47	4104.5	4526.58	5631.84	3604.07	22068.6	22577.8	22222.5	22266.6
NEG_10599	13.949	581.532	FA 40:5	[M-H]-	C40H70O2	Lipids and lipid-like molecules	Fatty Acyls		0.833	19107.3	20185.4	19046.5	18660.2	16105.8	16224.9	17544.6	19139.1	16537.9	15780	15289	17500.7	16083.5	16000.1	29630.5	15337.9	19954.7	20765.7	16132.3	16818.3	17556.5	19179.7	19774	29586.6	29588.9	29593.5	29993
POS_10122	13.991	613.478	L-Glutathione (oxidized form)	[M+H]+	C20H32N6O12S2	Organic acids and derivatives	Carboxylic acids and derivatives		0.705	40171.3	37944	52056	54607.3	43926.6	36840.1	27185	25016.7	20126.6	26422.8	33884.6	21819.6	16532.2	23792.3	17795.7	23283.5	11270	55754.3	57712.5	54075.1	45018.1	43884.2	42916.8	32096.4	37252.3	34987.7	35642
POS_5391	14.029	397.379	6-{9a,11a-dimethyl-1H,2H,3H,3aH,3bH,4H,8H,9H,9bH,10H,11H-cyclopenta[a]phenanthren-1-yl}-3-ethyl-2-methylheptane	[M+H]+	C29H48				0.849	600972	617907	667170	722776	620629	618733	732229	798629	691564	672145	829809	676462	374798	380257	247256	575772	208126	747497	671497	777335	687107	680709	735530	606109	616529	648802	587753
POS_648	14.036	146.117	(3R,4S)-3-Azaniumyl-4-methylhexanoate	[M+H]+	C7H15NO2	Organic acids and derivatives	Carboxylic acids and derivatives		0.728	26177.4	28475.6	34309.9	33049.9	28406.7	30431.9	37850.6	31797.4	26066	32336.6	31250.7	28920.5	28893.1	29388.7	31362.3	28696.8	33676.3	25793.8	31225.3	32330.2	32488.9	29524.1	33769	30541	31186.1	31203.6	28441.6
POS_242	14.058	106.086	Diethanolamine	[M+H]+	C4H11NO2	Organic nitrogen compounds	Organonitrogen compounds	C06772	0.758	183373	207022	182412	226696	176870	157743	211431	207023	165948	198551	219984	192760	195278	184372	201667	208009	209213	184414	197356	199598	199469	195174	216508	202619	206998	204728	198529
POS_9955	14.088	605.174	Methyl (4S,5Z,6S)-5-(2-acetyloxyethylidene)-4-[2-[2-(4-hydroxyphenyl)ethoxy]-2-oxoethyl]-6-[(2S,3R,4S,5S,6R)-3,4,5-trihydroxy-6-(hydroxymethyl)oxan-2-yl]oxy-4H-pyran-3-carboxylate	[M+Na]+	C27H34O14	Lipids and lipid-like molecules	Prenol lipids		0.733	7652.19	11460.9	9671.28	9848.52	8484.74	8883.29	8586.12	8480.02	9421.59	9489.03	10643.7	10056	8613.71	9423.48	8700.77	9344.48	9657.99	10174.9	9040.63	10148.6	9262.79	9779.44	7687.78	9969.1	9347.92	9238.34	9243.86
POS_345	14.089	118.086	Betaine	[M+H]+	C5H11NO2	Organic acids and derivatives	Carboxylic acids and derivatives		0.93	44940.5	40813.6	52582.4	33528.3	38550.8	29038.8	52073.4	49167.6	29417.5	43475.7	36330.2	32401.7	36582.5	30670.8	39040.5	37538	52401.4	56058.7	51043.7	31777.5	48648.5	44325.9	49303.6	37464.4	43171.7	39243.4	36021.4
